# Supplementary material for: Systematic microRNAome profiling reveals the roles of microRNAs in milk protein metabolism and quality: insights on low-quality forage utilization
Source: PubMed Central journal article supplement (PMC4756660; doi:10.1038/srep21194), 2016-02-17
Supplement: srep21194-s1.pdf [file srep21194-s1.pdf]

**Systematic genome-wide microRNAome reveals their roles in protein metabolism associated with dairy milk quality: omics based insights on utilization of low quality forage resources**

Diming Wang<sup>1,\*,#</sup>, Guanxiang Liang<sup>1,#</sup>, Bing Wang<sup>\*</sup>, Huizeng Sun<sup>\*</sup>, Jianxin Liu<sup>\*,§</sup>, Le Luo Guan<sup>#,§</sup>

<sup>\*</sup>Institute of Dairy Sciences, College of Animal Sciences, Zhejiang University, Hangzhou, P R, China; <sup>#</sup>Department of Agricultural, Food and Nutritional Science, University of Alberta, Edmonton, Canada

<sup>1</sup>These authors contributed equally to this work.

**<sup>§</sup>Corresponding authors:**

Dr. Jianxin Liu: Tel: 86-571-88982097; Fax: 86-571-88982097; E-mail: [liujx@zju.edu.cn](mailto:liujx@zju.edu.cn)

Dr. Le Luo Guan: Tel: 1-780-4922480; Fax: 1-780-4924265; E-mail: [lguan@ualberta.ca](mailto:lguan@ualberta.ca)

## Supplementary information

**Table S1.** Function categories of the predicted targets of 20 top commonly expressed microRNAs in rumen, duodenum, jejunum, liver and mammary gland.

| <b>Function category</b>                       | <b>FDR</b> | <b># of gene</b> |
|------------------------------------------------|------------|------------------|
| Organismal Survival                            | 6.64E-28   | 759              |
| Cellular Growth and Proliferation              | 4.29E-22   | 1083             |
| Cell Death and Survival                        | 1.32E-21   | 995              |
| Cell Morphology                                | 1.23E-18   | 697              |
| Cellular Movement                              | 1.23E-18   | 643              |
| Cardiovascular System Development and Function | 1.02E-16   | 427              |
| Organismal Development                         | 1.61E-15   | 927              |
| Cellular Function and Maintenance              | 8.58E-15   | 858              |
| Tissue Morphology                              | 5.19E-14   | 710              |
| Cellular Development                           | 8.72E-13   | 999              |
| Molecular Transport                            | 2.24E-12   | 613              |
| Gene Expression                                | 2.49E-11   | 649              |
| Hematological System Development and Function  | 2.86E-11   | 539              |
| Cell Cycle                                     | 8.95E-10   | 393              |
| Organ Morphology                               | 1.52E-09   | 403              |
| Tissue Development                             | 2.50E-09   | 820              |
| Cellular Assembly and Organization             | 3.77E-09   | 560              |
| Embryonic Development                          | 5.47E-09   | 677              |
| Lipid Metabolism                               | 7.73E-09   | 394              |
| Small Molecule Biochemistry                    | 7.73E-09   | 599              |

**Table S2.** Tissue-specific miRNAs in the rumen, duodenum, jejunum, liver and mammary gland.

| MicroRNA    | Tissue        | Average |                |
|-------------|---------------|---------|----------------|
|             |               | CPM     | standard error |
| miR-1434-3p | Rumen         | 1.3     | 0.18           |
| miR-2284f   | Rumen         | 1       | 0.14           |
| miR-2299-3p | Rumen         | 1.4     | 0.15           |
| miR-2320-5p | Rumen         | 1.7     | 0.15           |
| miR-2344    | Rumen         | 1.8     | 0.3            |
| miR-2349    | Rumen         | 1.3     | 0.15           |
| miR-2368-3p | Rumen         | 1.6     | 0.14           |
| miR-2387    | Rumen         | 1.9     | 0.41           |
| miR-2425-5p | Rumen         | 1.5     | 0.4            |
| miR-2448-3p | Rumen         | 1.6     | 0.25           |
| miR-6121-3p | Rumen         | 1.4     | 0.26           |
| miR-615     | Rumen         | 2.4     | 0.28           |
| miR-6525    | Rumen         | 1.1     | 0.16           |
| miR-6527    | Rumen         | 1.9     | 0.3            |
| miR-216b    | Duodenum      | 1.2     | 0.11           |
| miR-2284p   | Duodenum      | 0.9     | 0.08           |
| miR-2285l   | Duodenum      | 1       | 0.13           |
| miR-383     | Duodenum      | 1.3     | 0.3            |
| miR-2320-3p | Jejunum       | 1       | 0.1            |
| miR-6526    | Jejunum       | 2.9     | 0.47           |
| miR-122     | Liver         | 11020.9 | 277.62         |
| miR-1247-3p | Liver         | 1.9     | 0.55           |
| miR-1940    | Liver         | 1       | 0.17           |
| miR-2399-5p | Liver         | 1.7     | 0.19           |
| miR-2415-3p | Liver         | 8.4     | 1.86           |
| miR-2483-3p | Liver         | 29.2    | 4.23           |
| miR-3957    | Liver         | 1.9     | 0.42           |
| miR-433     | Liver         | 2.6     | 0.34           |
| miR-551b    | Liver         | 1.5     | 0.22           |
| miR-6518    | Liver         | 0.8     | 0.14           |
| miR-6521    | Liver         | 1.9     | 0.25           |
| miR-758     | Liver         | 1.7     | 0.19           |
| miR-1298    | Mammary gland | 2.8     | 0.92           |
| miR-134     | Mammary gland | 0.9     | 0.12           |
| miR-196b    | Mammary gland | 62.6    | 8.01           |
| miR-2284j   | Mammary gland | 12.3    | 1.19           |
| miR-376d    | Mammary gland | 1.1     | 0.2            |

**Table S3.** Tissue-dependent differentially expressed miRNAs in the rumen, duodenum, jejunum, liver and mammary gland.

| MicroRNA   | Duodenu |         |         | Mammary |         | P      | Standard error<br>mean | Different expressed   |
|------------|---------|---------|---------|---------|---------|--------|------------------------|-----------------------|
|            | Rumen   | m       | Jejunum | Liver   | gland   |        |                        |                       |
| miR-10a    | 14558B  | 13736B  | 41168A  | 3275C   | 4047C   | <0.001 | 2700.09                | Jejunum(up)           |
| miR-223    | 65.3C   | 244.1B  | 553.5A  | 107.7C  | 37C     | <0.001 | 32.74                  | Jejunum(up)           |
| miR-145    | 2296.5A | 2241.2A | 2383.5A | 586.1C  | 1247.3B | <0.001 | 169.16                 | Liver(down)           |
| miR-199b   | 1132.6A | 1102.1A | 1187.6A | 215.6C  | 821.6B  | <0.001 | 66.63                  | Liver(down)           |
| miR-200a   | 3815.4A | 2144.7B | 1403B   | 100.8C  | 4264.8A | <0.001 | 385.28                 | Liver(down)           |
| miR-2336   | 53.4A   | 52.8A   | 53.4A   | 19C     | 44.5B   | <0.001 | 2.54                   | Liver(down)           |
| miR-324    | 12B     | 23.5A   | 25.5A   | 5C      | 13.9B   | <0.001 | 1.32                   | Liver(down)           |
| miR-34a    | 185.7A  | 108.7B  | 105B    | 51.1C   | 119.1B  | <0.001 | 11.16                  | Liver(down)           |
| miR-362-5p | 23A     | 14.4B   | 13B     | 5.2C    | 21.6A   | <0.001 | 1.39                   | Liver(down)           |
| miR-6120-3 |         |         |         |         |         |        |                        |                       |
| p          | 25.2B   | 29.5BA  | 28.2B   | 7C      | 35.2A   | <0.001 | 2.32                   | Liver(down)           |
|            |         |         |         | 21244.7 |         |        |                        |                       |
| miR-101    | 5357.2B | 2686.8C | 3050C   | A       | 6421.2B | <0.001 | 512.32                 | Liver(up)             |
| miR-144    | 9.1B    | 7.4B    | 9.4B    | 84.5A   | 13.6B   | <0.001 | 4.31                   | Liver(up)             |
| miR-154c   | 9.7C    | 19CB    | 21.2CB  | 106A    | 36.1B   | <0.001 | 6.08                   | Liver(up)             |
| miR-185    | 25.5C   | 39.2CB  | 33.9CB  | 86.4A   | 43.2B   | <0.001 | 5.68                   | Liver(up)             |
| miR-22-3p  | 39540B  | 18005C  | 19203C  | 129073A | 24654C  | <0.001 | 3329.83                | Liver(up)             |
| miR-22-5p  | 34CB    | 26.8CD  | 23.2D   | 85.3A   | 39.3B   | <0.001 | 3.42                   | Liver(up)             |
| miR-2285f  | 133.9B  | 118.8B  | 114B    | 468.7A  | 76.4C   | <0.001 | 9.48                   | Liver(up)             |
| miR-339a   | 436.3C  | 470.8C  | 480.8C  | 1349.2A | 659.9B  | <0.001 | 42.91                  | Liver(up)             |
| miR-410    | 14.7D   | 32.1CD  | 38.5CB  | 131.4A  | 57.8B   | <0.001 | 8.04                   | Liver(up)             |
| miR-411c-5 |         |         |         |         |         |        |                        |                       |
| p          | 13.8C   | 13.3C   | 17.5C   | 65.6A   | 27.7B   | <0.001 | 3.37                   | Liver(up)             |
| miR-451    | 203.9B  | 105.9B  | 131.6B  | 1063.7A | 275.1B  | <0.001 | 67.46                  | Liver(up)             |
| miR-543    | 1.8CB   | 1.2C    | 1.4C    | 10.3A   | 3.1B    | <0.001 | 0.55                   | Liver(up)             |
| miR-874    | 23.4B   | 20.9B   | 26.4B   | 176.3A  | 15.7B   | <0.001 | 4.41                   | Liver(up)             |
| miR-487b   | 5C      | 10.3CB  | 11.4CB  | 42.8A   | 17B     | <0.001 | 2.57                   | Liver(up),Rumen(down) |
| miR-146a   | 1225B   | 3664.6A | 3802A   | 1204.7B | 503.2C  | <0.001 | 199.37                 | Mammary gland(down)   |
| miR-455-3p | 106.8A  | 78.1B   | 96.2BA  | 90.2BA  | 14.4C   | <0.001 | 7.91                   | Mammary gland(down)   |
| miR-505    | 35.9B   | 33.4B   | 30.7B   | 64.2A   | 14.4C   | <0.001 | 2.18                   | Mammary gland(down)   |
| let-7c     | 1064.5B | 519.6C  | 530.1C  | 1105.7B | 2324.6A | <0.001 | 123.61                 | Mammary gland(up)     |
| miR-10b    | 28356CB | 15974CD | 37713B  | 1349D   | 98658A  | <0.001 | 5898.92                | Mammary gland(up)     |
| miR-141    | 11165B  | 6511C   | 4630C   | 285D    | 29858A  | <0.001 | 1523.83                | Mammary gland(up)     |
| miR-1839   | 145.6B  | 129B    | 125B    | 118.9B  | 362.6A  | <0.001 | 19.69                  | Mammary gland(up)     |
| miR-190a   | 15.8B   | 35.5B   | 44.1B   | 4.5B    | 108.7A  | <0.001 | 15.8                   | Mammary gland(up)     |
| miR-200c   | 1756.7B | 1031.3C | 682.5DC | 29.3D   | 5113.8A | <0.001 | 245.28                 | Mammary gland(up)     |
| miR-2285t  | 29.2B   | 33.2B   | 30B     | 73.5B   | 879.8A  | <0.001 | 69.31                  | Mammary gland(up)     |
| miR-340    | 12.8B   | 11.8B   | 10.8B   | 9B      | 28.3A   | <0.001 | 2.08                   | Mammary gland(up)     |
| miR-34c    | 4.2B    | 15B     | 10.3B   | 6.2B    | 61.8A   | <0.001 | 4.82                   | Mammary gland(up)     |

|            |         |         |         |         |         |            |         |                       |
|------------|---------|---------|---------|---------|---------|------------|---------|-----------------------|
| miR-362-3p | 8.4B    | 10.9B   | 9B      | 4.5B    | 32.9A   | <0.001     | 2.28    | Mammary gland(up)     |
|            |         |         |         |         |         | 0.04595353 |         |                       |
| miR-379    | 5.7B    | 16.4B   | 11.7B   | 13.7B   | 67.5A   | 9          | 15.38   | Mammary gland(up)     |
| miR-502a   | 2.4B    | 1.9B    | 2B      | 1.8B    | 12A     | <0.001     | 0.6     | Mammary gland(up)     |
| miR-6522   | 5.9B    | 4B      | 5.5B    | 2.4B    | 95.1A   | <0.001     | 2.15    | Mammary gland(up)     |
| miR-660    | 1465.7B | 1139.4B | 1166.1B | 936.4B  | 3656.3A | <0.001     | 179.88  | Mammary gland(up)     |
| miR-96     | 22.9B   | 13.7CB  | 9.3CB   | 1.1C    | 93.1A   | <0.001     | 5.27    | Mammary gland(up)     |
| miR-99a-5p | 684.8B  | 441.1B  | 364B    | 607.3B  | 2487.4A | <0.001     | 207.02  | Mammary gland(up)     |
| miR-139    | 33.9E   | 92.8D   | 129.3C  | 226.2A  | 161.4B  | <0.001     | 8.66    | Rumen(down)           |
| miR-2419-5 |         |         |         |         |         |            |         |                       |
| p          | 25.4C   | 196BA   | 240.5A  | 141.5B  | 196.7BA | <0.001     | 22.84   | Rumen(down)           |
| miR-450b   | 23.9C   | 122.9BA | 128.6A  | 142.9A  | 96.9B   | <0.001     | 9.8     | Rumen(down)           |
| miR-574    | 16C     | 89.7A   | 84.5A   | 42B     | 37.4B   | <0.001     | 3.4     | Rumen(down)           |
|            |         |         |         |         |         | 0.00717880 |         |                       |
| miR-1271   | 132.7A  | 48.2B   | 38B     | 4.1B    | 46.3B   | 4          | 26.43   | Rumen(up)             |
| miR-147    | 688.4A  | 40.5B   | 48.5B   | 11.7B   | 17.6B   | <0.001     | 14.49   | Rumen(up)             |
| miR-149-5p | 183.1A  | 16.1B   | 17.1B   | 22.3B   | 20B     | <0.001     | 6.13    | Rumen(up)             |
| miR-193a-3 |         |         |         |         |         |            |         |                       |
| p          | 1225.9A | 27.1C   | 28.6C   | 240.3CB | 284.9B  | <0.001     | 84.05   | Rumen(up)             |
| miR-19a    | 454.4A  | 179.4B  | 160CB   | 74D     | 97.2CD  | <0.001     | 25.31   | Rumen(up)             |
| miR-210    | 736.2A  | 41.6B   | 41.3B   | 77.9B   | 92.1B   | <0.001     | 18.04   | Rumen(up)             |
| miR-21-3p  | 808.9A  | 91.1B   | 148.4B  | 80.1B   | 79.3B   | <0.001     | 34.14   | Rumen(up)             |
| miR-224    | 104.6A  | 19.7D   | 21.3D   | 49.5B   | 32.5C   | <0.001     | 3.71    | Rumen(up)             |
|            |         |         | 2085.4C |         |         |            |         |                       |
| miR-23b-3p | 5088.2A | 2392B   | B       | 970.7D  | 1753.3C | <0.001     | 170.77  | Rumen(up)             |
|            | 11433.5 |         |         |         |         |            |         |                       |
| miR-27a-3p | A       | 2590.8B | 2833.2B | 1615.9C | 2736.7B | <0.001     | 263.84  | Rumen(up)             |
| miR-27a-5p | 23.1A   | 2.5C    | 2.6C    | 2.1C    | 7.2B    | <0.001     | 0.82    | Rumen(up)             |
| miR-27b    | 103506A | 31482CB | 33606CB | 36298B  | 30081C  | <0.001     | 1833.8  | Rumen(up)             |
| miR-31     | 4519A   | 331.7B  | 278B    | 654.1B  | 520B    | <0.001     | 145.1   | Rumen(up)             |
| miR-3431   | 125.6A  | 22.2C   | 21.7C   | 43.7B   | 40.3B   | <0.001     | 3.97    | Rumen(up)             |
| miR-378    | 55197A  | 9994B   | 8847B   | 1220C   | 1408C   | <0.001     | 1462.14 | Rumen(up)             |
| miR-378b   | 182.2A  | 48.8B   | 38.8B   | 8.1C    | 7C      | <0.001     | 5.71    | Rumen(up)             |
| miR-378c   | 2115.8A | 362.2B  | 350.3B  | 61.2C   | 95.7C   | <0.001     | 51.77   | Rumen(up)             |
|            |         |         | 1003.3C |         |         |            |         |                       |
| miR-429    | 2576.7A | 1097.8B | B       | 70.2D   | 820.1C  | <0.001     | 90.13   | Rumen(up)             |
| miR-452    | 22.1A   | 4.8D    | 4.7D    | 6.8C    | 10.6B   | <0.001     | 0.7     | Rumen(up)             |
| miR-6523   | 9.3A    | 2.1C    | 3.3B    | 2.3C    | 1.5C    | <0.001     | 0.36    | Rumen(up)             |
| miR-93     | 2398.1A | 1133.5B | 1170.7B | 728.1C  | 509.9D  | <0.001     | 58.08   | Rumen(up)             |
| miR-23a    | 3014.6A | 1000.8B | 1041.4B | 432.9C  | 1094.7B | <0.001     | 91.12   | Rumen(up),Liver(down) |
| miR-24-3p  | 3344.6A | 1659.7B | 1479.8B | 610.3C  | 1462.4B | <0.001     | 200.7   | Rumen(up),Liver(down) |
|            |         |         |         |         |         |            |         | Rumen(up),Mammary     |
| miR-708    | 179.6A  | 41.5B   | 46.4B   | 65.8B   | 14.7C   | <0.001     | 8.71    | gland(down)           |

**Table S4.** Predicted targets of tissue-dependent differentially expressed microRNAs in rumen, duodenum, jejunum, liver and mammary gland and function categories predominantly targeted by them.

| <b>MicroRNA category</b>                              | <b>Function category</b>                       | <b>FDR</b>                        | <b>#<br/>Molecules</b> |     |
|-------------------------------------------------------|------------------------------------------------|-----------------------------------|------------------------|-----|
| Rumen-up regulated                                    | Cell Death and Survival                        | 4.62E-36                          | 1411                   |     |
|                                                       | Cellular Growth and Proliferation              | 2.34E-34                          | 1505                   |     |
|                                                       | Organismal Survival                            | 4.02E-33                          | 1016                   |     |
|                                                       | Cellular Assembly and Organization             | 6.23E-28                          | 849                    |     |
|                                                       | Cellular Function and Maintenance              | 6.23E-28                          | 1253                   |     |
|                                                       | Cell Morphology                                | 8.97E-25                          | 1078                   |     |
|                                                       | Gene Expression                                | 2.93E-23                          | 942                    |     |
|                                                       | Cellular Movement                              | 5.38E-21                          | 863                    |     |
|                                                       | Molecular Transport                            | 6.31E-21                          | 966                    |     |
|                                                       | Cardiovascular System Development and Function | 2.73E-19                          | 606                    |     |
|                                                       | Cellular Development                           | 4.53E-19                          | 1394                   |     |
| Rumen-down regulated                                  | Cell Death and Survival                        | 1.26E-08                          | 513                    |     |
|                                                       | Cell Morphology                                | 4.14E-08                          | 417                    |     |
|                                                       | Cellular Growth and Proliferation              | 5.14E-08                          | 546                    |     |
|                                                       | Cellular Movement                              | 2.15E-07                          | 321                    |     |
|                                                       | Nervous System Development and Function        | 4.47E-06                          | 325                    |     |
|                                                       | Organismal Survival                            | 4.47E-06                          | 336                    |     |
|                                                       | Cellular Assembly and Organization             | 6.31E-06                          | 275                    |     |
|                                                       | Cellular Function and Maintenance              | 6.31E-06                          | 465                    |     |
|                                                       | Cellular Compromise                            | 3.45E-05                          | 84                     |     |
|                                                       | Tissue Morphology                              | 3.45E-05                          | 330                    |     |
|                                                       | Cellular Development                           | 4.63E-05                          | 511                    |     |
|                                                       | Gene Expression                                | 5.13E-05                          | 318                    |     |
|                                                       | Jejunum up-regulated                           | Cellular Development              | 0.00807                | 113 |
|                                                       |                                                | Cellular Growth and Proliferation | 0.00807                | 127 |
| Cell Signaling                                        |                                                | 0.011                             | 55                     |     |
| Cardiovascular System Development and Function        |                                                | 0.011                             | 56                     |     |
| Cellular Movement                                     |                                                | 0.0173                            | 86                     |     |
| Cell Morphology                                       |                                                | 0.0173                            | 100                    |     |
| Organismal Development                                |                                                | 0.0242                            | 74                     |     |
| Cell Death and Survival                               |                                                | 0.0294                            | 113                    |     |
| Tissue Morphology                                     |                                                | 0.0352                            | 82                     |     |
| Skeletal and Muscular System Development and Function |                                                | 0.0383                            | 47                     |     |
| Tissue Development                                    |                                                | 0.0383                            | 77                     |     |
| Nucleic Acid Metabolism                               |                                                | 0.0424                            | 9                      |     |
| Small Molecule Biochemistry                           |                                                | 0.0424                            | 44                     |     |

|                                 |                                                |             |      |
|---------------------------------|------------------------------------------------|-------------|------|
|                                 | Hair and Skin Development and Function         | 0.0473      | 22   |
|                                 | Organismal Survival                            | 0.0473      | 83   |
|                                 | Organ Morphology                               | 0.0476      | 31   |
|                                 | Cellular Assembly and Organization             | 0.0492      | 71   |
|                                 | Cellular Function and Maintenance              | 0.0492      | 71   |
| Liver up-regulated              | Cell Death and Survival                        | 6.9E-21     | 961  |
|                                 | Organismal Survival                            | 6.09E-20    | 706  |
|                                 | Cellular Growth and Proliferation              | 6.95E-19    | 1033 |
|                                 | Cell Morphology                                | 3.05E-15    | 736  |
|                                 | Cellular Assembly and Organization             | 1.02E-13    | 572  |
|                                 | Cellular Function and Maintenance              | 1.02E-13    | 838  |
|                                 | Cellular Movement                              | 3.27E-13    | 587  |
|                                 | Molecular Transport                            | 1.97E-12    | 672  |
|                                 | Cardiovascular System Development and Function | 2.78E-11    | 376  |
|                                 | Organismal Development                         | 2.78E-11    | 879  |
|                                 | Cellular Development                           | 5.72E-11    | 920  |
| Liver down-regulated            | Cellular Growth and Proliferation              | 6.67E-22    | 843  |
|                                 | Organismal Survival                            | 2.38E-21    | 553  |
|                                 | Cell Morphology                                | 2.37E-16    | 659  |
|                                 | Cellular Movement                              | 2.37E-16    | 496  |
|                                 | Cellular Assembly and Organization             | 2.37E-16    | 476  |
|                                 | Cellular Function and Maintenance              | 2.37E-16    | 715  |
|                                 | Cell Death and Survival                        | 7.71E-16    | 756  |
|                                 | Molecular Transport                            | 1.85E-12    | 491  |
|                                 | Organismal Development                         | 1.5E-11     | 681  |
|                                 | Tissue Morphology                              | 6.78E-11    | 518  |
| Mammary gland up-regulated      | Organismal Survival                            | 1.1E-18     | 589  |
|                                 | Cell Morphology                                | 1.24E-16    | 683  |
|                                 | Cellular Growth and Proliferation              | 6.17E-14    | 881  |
|                                 | Cell Death and Survival                        | 3.21E-13    | 800  |
|                                 | Cellular Assembly and Organization             | 5.07E-12    | 487  |
|                                 | Cellular Function and Maintenance              | 5.07E-12    | 695  |
|                                 | Molecular Transport                            | 2.66E-10    | 507  |
|                                 | Gene Expression                                | 3.53E-09    | 516  |
|                                 | Cellular Movement                              | 4.29E-09    | 502  |
|                                 | Cardiovascular System Development and Function | 1.48E-08    | 335  |
| Mammary gland<br>down-regulated | Organismal Survival                            | 1.31E-09    | 334  |
|                                 | Cell Death and Survival                        | 8.34E-09    | 439  |
|                                 | Cellular Growth and Proliferation              | 0.000000162 | 482  |
|                                 | Cell Morphology                                | 0.0000176   | 314  |
|                                 | Cellular Movement                              | 0.0000483   | 260  |
|                                 | Immune Cell Trafficking                        | 0.0000483   | 144  |
|                                 | Cellular Function and Maintenance              | 0.000072    | 354  |

|                                                |          |     |
|------------------------------------------------|----------|-----|
| Cellular Assembly and Organization             | 0.000113 | 243 |
| Cellular Development                           | 0.00014  | 409 |
| Cardiovascular System Development and Function | 0.000141 | 183 |
| Tissue Development                             | 0.000141 | 331 |
| Hematological System Development and Function  | 0.000152 | 248 |
| Post-Translational Modification                | 0.000164 | 142 |

---



**Table S5.** Conservation analysis miRNAs.

| <b>MicroRNA</b> | <b>Conservation</b> |
|-----------------|---------------------|
| let-7a-3p       | Poorly conserved    |
| let-7a-5p       | Highly conserved    |
| let-7b          | Highly conserved    |
| let-7d          | Highly conserved    |
| let-7e          | Highly conserved    |
| let-7f          | Highly conserved    |
| let-7g          | Highly conserved    |
| let-7i          | Highly conserved    |
| miR-1           | Highly conserved    |
| miR-100         | Highly conserved    |
| miR-103         | Highly conserved    |
| miR-106a        | Highly conserved    |
| miR-106b        | Highly conserved    |
| miR-107         | Highly conserved    |
| miR-1185        | Poorly conserved    |
| miR-1246        | Poorly conserved    |
| miR-1249        | Poorly conserved    |
| miR-125a        | Highly conserved    |
| miR-125b        | Highly conserved    |
| miR-1260b       | Poorly conserved    |
| miR-126-3p      | Poorly conserved    |
| miR-126-5p      | Poorly conserved    |
| miR-127         | Conserved           |
| miR-128         | Highly conserved    |
| miR-1291        | Poorly conserved    |
| miR-1296        | Poorly conserved    |
| miR-1306        | Poorly conserved    |
| miR-1307        | Poorly conserved    |
| miR-130a        | Highly conserved    |
| miR-130b        | Highly conserved    |
| miR-132         | Highly conserved    |
| miR-133a        | Highly conserved    |
| miR-133b        | Highly conserved    |
| miR-1343-3p     | Poorly conserved    |
| miR-136         | Conserved           |
| miR-138         | Highly conserved    |
| miR-1388-3p     | Poorly conserved    |
| miR-1388-5p     | Poorly conserved    |
| miR-140         | Poorly conserved    |
| miR-142-3p      | Poorly conserved    |
| miR-142-5p      | Poorly conserved    |
| miR-143         | Highly conserved    |

|             |                  |
|-------------|------------------|
| miR-1468    | Poorly conserved |
| miR-146b    | Highly conserved |
| miR-148a    | Highly conserved |
| miR-148b    | Highly conserved |
| miR-150     | Highly conserved |
| miR-151-3p  | Poorly conserved |
| miR-151-5p  | Poorly conserved |
| miR-152     | Highly conserved |
| miR-154b    | Poorly conserved |
| miR-155     | Highly conserved |
| miR-15a     | Highly conserved |
| miR-15b     | Highly conserved |
| miR-16a     | Highly conserved |
| miR-16b     | Highly conserved |
| miR-17-3p   | Poorly conserved |
| miR-17-5p   | Highly conserved |
| miR-1814c   | Bovine specific  |
| miR-181a    | Highly conserved |
| miR-181b    | Highly conserved |
| miR-181c    | Highly conserved |
| miR-181d    | Highly conserved |
| miR-182     | Highly conserved |
| miR-183     | Highly conserved |
| miR-186     | Conserved        |
| miR-188     | Poorly conserved |
| miR-18a     | Highly conserved |
| miR-190b    | Highly conserved |
| miR-191     | Highly conserved |
| miR-192     | Highly conserved |
| miR-193a-5p | Poorly conserved |
| miR-193b    | Highly conserved |
| miR-194     | Highly conserved |
| miR-195     | Highly conserved |
| miR-197     | Conserved        |
| miR-199a-3p | Poorly conserved |
| miR-199a-5p | Highly conserved |
| miR-199c    | Poorly conserved |
| miR-19b     | Highly conserved |
| miR-200b    | Highly conserved |
| miR-204     | Highly conserved |
| miR-20a     | Highly conserved |
| miR-214     | Highly conserved |
| miR-215     | Highly conserved |
| miR-21-5p   | Highly conserved |

|             |                  |
|-------------|------------------|
| miR-218     | Highly conserved |
| miR-219-5p  | Highly conserved |
| miR-221     | Highly conserved |
| miR-222     | Highly conserved |
| miR-2284aa  | Bovine specific  |
| miR-2284k   | Bovine specific  |
| miR-2284v   | Bovine specific  |
| miR-2284w   | Bovine specific  |
| miR-2284x   | Bovine specific  |
| miR-2284y   | Bovine specific  |
| miR-2284z   | Bovine specific  |
| miR-2285b   | Bovine specific  |
| miR-2285c   | Bovine specific  |
| miR-2285e   | Bovine specific  |
| miR-2285g   | Bovine specific  |
| miR-2285k   | Bovine specific  |
| miR-2285o   | Bovine specific  |
| miR-2285q   | Bovine specific  |
| miR-2285u   | Bovine specific  |
| miR-2299-5p | Bovine specific  |
| miR-2310    | Bovine specific  |
| miR-2332    | Poorly conserved |
| miR-2339    | Bovine specific  |
| miR-24      | Poorly conserved |
| miR-2411-3p | Poorly conserved |
| miR-2424    | Poorly conserved |
| miR-2443    | Bovine specific  |
| miR-2478    | Bovine specific  |
| miR-2484    | Bovine specific  |
| miR-2487    | Bovine specific  |
| miR-25      | Highly conserved |
| miR-26a     | Highly conserved |
| miR-26b     | Highly conserved |
| miR-28      | Conserved        |
| miR-2887    | Bovine specific  |
| miR-2904    | Bovine specific  |
| miR-296     | Poorly conserved |
| miR-29a     | Poorly conserved |
| miR-29b     | Highly conserved |
| miR-29c     | Highly conserved |
| miR-29d     | Poorly conserved |
| miR-301a    | Highly conserved |
| miR-301b    | Highly conserved |
| miR-30a-5p  | Highly conserved |

|             |                  |
|-------------|------------------|
| miR-30b-3p  | Poorly conserved |
| miR-30b-5p  | Highly conserved |
| miR-30c     | Highly conserved |
| miR-30d     | Highly conserved |
| miR-30e-5p  | Highly conserved |
| miR-30f     | Highly conserved |
| miR-32      | Highly conserved |
| miR-320a    | Conserved        |
| miR-326     | Conserved        |
| miR-328     | Conserved        |
| miR-331     | Poorly conserved |
| miR-335     | Conserved        |
| miR-338     | Highly conserved |
| miR-339b    | Conserved        |
| miR-33a     | Highly conserved |
| miR-33b     | Highly conserved |
| miR-342     | Conserved        |
| miR-3432    | Poorly conserved |
| miR-345-3p  | Poorly conserved |
| miR-345-5p  | Poorly conserved |
| miR-361     | Conserved        |
| miR-3613    | Poorly conserved |
| miR-363     | Poorly conserved |
| miR-365-3p  | Highly conserved |
| miR-369-3p  | Poorly conserved |
| miR-369-5p  | Poorly conserved |
| miR-374a    | Conserved        |
| miR-374b    | Conserved        |
| miR-375     | Poorly conserved |
| miR-376b    | Conserved        |
| miR-376e    | Conserved        |
| miR-380-3p  | Poorly conserved |
| miR-381     | Conserved        |
| miR-411a    | Poorly conserved |
| miR-411c-3p | Bovine specific  |
| miR-421     | Conserved        |
| miR-423-3p  | Poorly conserved |
| miR-423-5p  | Poorly conserved |
| miR-424-5p  | Highly conserved |
| miR-425-3p  | Poorly conserved |
| miR-425-5p  | Poorly conserved |
| miR-4286    | Poorly conserved |
| miR-432     | Poorly conserved |
| miR-449a    | Highly conserved |

|             |                  |
|-------------|------------------|
| miR-450a    | Conserved        |
| miR-454     | Highly conserved |
| miR-455-5p  | Highly conserved |
| miR-484     | Poorly conserved |
| miR-486     | Conserved        |
| miR-490     | Highly conserved |
| miR-491     | Conserved        |
| miR-493     | Poorly conserved |
| miR-494     | Conserved        |
| miR-495     | Conserved        |
| miR-497     | Highly conserved |
| miR-499     | Highly conserved |
| miR-500     | Poorly conserved |
| miR-502b    | Poorly conserved |
| miR-504     | Conserved        |
| miR-532     | Poorly conserved |
| miR-545-3p  | Poorly conserved |
| miR-545-5p  | Poorly conserved |
| miR-582     | Poorly conserved |
| miR-6119-3p | Bovine specific  |
| miR-6119-5p | Bovine specific  |
| miR-6123    | Bovine specific  |
| miR-628     | Poorly conserved |
| miR-6517    | Bovine specific  |
| miR-652     | Poorly conserved |
| miR-6520    | Bovine specific  |
| miR-6524    | Bovine specific  |
| miR-6529    | Poorly conserved |
| miR-655     | Poorly conserved |
| miR-665     | Poorly conserved |
| miR-671     | Poorly conserved |
| miR-677     | Poorly conserved |
| miR-7       | Highly conserved |
| miR-744     | Poorly conserved |
| miR-760-3p  | Poorly conserved |
| miR-769     | Poorly conserved |
| miR-877     | Poorly conserved |
| miR-92a     | Highly conserved |
| miR-92b     | Highly conserved |
| miR-95      | Poorly conserved |
| miR-9-5p    | Highly conserved |
| miR-98      | Highly conserved |
| miR-99a-3p  | Poorly conserved |
| miR-99b     | Highly conserved |

|             |                  |
|-------------|------------------|
| miR-10a     | Highly conserved |
| miR-223     | Highly conserved |
| miR-145     | Highly conserved |
| miR-199b    | Highly conserved |
| miR-200a    | Highly conserved |
| miR-2336    | Bovine specific  |
| miR-324     | Conserved        |
| miR-34a     | Highly conserved |
| miR-362-5p  | Poorly conserved |
| miR-6120-3p | Bovine specific  |
| miR-101     | Highly conserved |
| miR-144     | Highly conserved |
| miR-154c    | Poorly conserved |
| miR-185     | Conserved        |
| miR-22-3p   | Highly conserved |
| miR-22-5p   | Poorly conserved |
| miR-2285f   | Bovine specific  |
| miR-339a    | Conserved        |
| miR-410     | Conserved        |
| miR-411c-5p | Bovine specific  |
| miR-451     | Highly conserved |
| miR-543     | Conserved        |
| miR-874     | Conserved        |
| miR-487b    | Conserved        |
| miR-146a    | Highly conserved |
| miR-455-3p  | Poorly conserved |
| miR-505     | Conserved        |
| let-7c      | Highly conserved |
| miR-10b     | Highly conserved |
| miR-141     | Highly conserved |
| miR-1839    | Poorly conserved |
| miR-190a    | Highly conserved |
| miR-200c    | Highly conserved |
| miR-2285t   | Bovine specific  |
| miR-340     | Poorly conserved |
| miR-34c     | Highly conserved |
| miR-362-3p  | Conserved        |
| miR-379     | Conserved        |
| miR-502a    | Poorly conserved |
| miR-6522    | Bovine specific  |
| miR-660     | Poorly conserved |
| miR-96      | Highly conserved |
| miR-99a-5p  | Highly conserved |
| miR-139     | Highly conserved |

|             |                  |
|-------------|------------------|
| miR-2419-5p | Bovine specific  |
| miR-450b    | Poorly conserved |
| miR-574     | Poorly conserved |
| miR-1271    | Highly conserved |
| miR-147     | Poorly conserved |
| miR-149-5p  | Conserved        |
| miR-193a-3p | Highly conserved |
| miR-19a     | Highly conserved |
| miR-210     | Poorly conserved |
| miR-21-3p   | Poorly conserved |
| miR-224     | Conserved        |
| miR-23b-3p  | Highly conserved |
| miR-27a-3p  | Highly conserved |
| miR-27a-5p  | Poorly conserved |
| miR-27b     | Highly conserved |
| miR-31      | Highly conserved |
| miR-3431    | Poorly conserved |
| miR-378     | Conserved        |
| miR-378b    | Poorly conserved |
| miR-378c    | Conserved        |
| miR-429     | Highly conserved |
| miR-452     | Poorly conserved |
| miR-6523    | Bovine specific  |
| miR-93      | Highly conserved |
| miR-23a     | Highly conserved |
| miR-24-3p   | Highly conserved |
| miR-708     | Conserved        |
| miR-1434-3p | Bovine specific  |
| miR-2284f   | Bovine specific  |
| miR-2299-3p | Bovine specific  |
| miR-2320-5p | Poorly conserved |
| miR-2344    | Bovine specific  |
| miR-2349    | Bovine specific  |
| miR-2368-3p | Bovine specific  |
| miR-2387    | Poorly conserved |
| miR-2425-5p | Bovine specific  |
| miR-2448-3p | Bovine specific  |
| miR-6121-3p | Bovine specific  |
| miR-615     | Poorly conserved |
| miR-6525    | Bovine specific  |
| miR-6527    | Bovine specific  |
| miR-216b    | Highly conserved |
| miR-2284p   | Bovine specific  |
| miR-2285l   | Bovine specific  |

|             |                  |
|-------------|------------------|
| miR-383     | Highly conserved |
| miR-2320-3p | Poorly conserved |
| miR-6526    | Bovine specific  |
| miR-122     | Highly conserved |
| miR-1247-3p | Poorly conserved |
| miR-1940    | Poorly conserved |
| miR-2399-5p | Bovine specific  |
| miR-2415-3p | Bovine specific  |
| miR-2483-3p | Poorly conserved |
| miR-3957    | Poorly conserved |
| miR-433     | Conserved        |
| miR-551b    | Poorly conserved |
| miR-6518    | Bovine specific  |
| miR-6521    | Bovine specific  |
| miR-758     | Conserved        |
| miR-1298    | Poorly conserved |
| miR-134     | Conserved        |
| miR-196b    | Highly conserved |
| miR-2284j   | Bovine specific  |
| miR-376d    | Conserved        |

---



**Table S6.** Predicted function categories of top 10 highly expressed bovine specific microRNAs in rumen, duodenum, jejunum, liver and mammary gland.

| <b>Tissue</b> | <b>Diseases or Functions Annotation</b> | <b>FDR</b>       | <b># Molecules</b> |
|---------------|-----------------------------------------|------------------|--------------------|
| Rumen         | Proliferation Of Cells                  | 1.62E-19         | 881                |
|               | Organismal Death                        | 1.62E-19         | 618                |
|               | Expression Of Rna                       | 4.67E-17         | 547                |
|               | Transcription                           | 1.21E-16         | 493                |
|               | Transcription Of Rna                    | 1.79E-16         | 485                |
|               | Necrosis                                | 1.79E-16         | 636                |
|               | Cancer                                  | 3.46E-16         | 2219               |
|               | Cell Death Of Tumor Cell Lines          | 1.40E-15         | 402                |
|               | Apoptosis                               | 2.94E-15         | 645                |
|               | Organismal Death                        | 1.34E-18         | 589                |
| Duodenum      | Proliferation Of Cells                  | 2.41E-16         | 825                |
|               | Expression Of Rna                       | 2.97E-14         | 511                |
|               | Transcription                           | 7.26E-14         | 460                |
|               | Transcription Of Rna                    | 1.33E-13         | 452                |
|               | Cancer                                  | 1.36E-13         | 2097               |
|               | Neoplasia Of Epithelial Tissue          | 2.27E-13         | 1772               |
|               | Epithelial Cancer                       | 8.27E-13         | 1737               |
|               | Solid Tumor                             | 1.05E-12         | 2027               |
|               | Cell Death Of Tumor Cell Lines          | 1.53E-12         | 372                |
|               | Organismal Death                        | 1.34E-18         | 589                |
| Jejunum       | Proliferation Of Cells                  | 2.41E-16         | 825                |
|               | Expression Of Rna                       | 2.97E-14         | 511                |
|               | Transcription                           | 7.26E-14         | 460                |
|               | Transcription Of Rna                    | 1.33E-13         | 452                |
|               | Cancer                                  | 1.36E-13         | 2097               |
|               | Neoplasia Of Epithelial Tissue          | 2.27E-13         | 1772               |
|               | Epithelial Cancer                       | 8.27E-13         | 1737               |
|               | Solid Tumor                             | 1.05E-12         | 2027               |
|               | Cell Death Of Tumor Cell Lines          | 1.53E-12         | 372                |
|               | Organismal Death                        | 2.23E-16         | 640                |
| Liver         | Cancer                                  | 2.99E-16         | 2370               |
|               | Malignant Solid Tumor                   | 1.39E-15         | 2277               |
|               | Proliferation Of Cells                  | 1.94E-15         | 909                |
|               | Solid Tumor                             | 3.60E-15         | 2290               |
|               | Epithelial Cancer                       | 4.32E-14         | 1955               |
|               | Neoplasia Of Epithelial Tissue          | 8.34E-14         | 1988               |
|               | Necrosis                                | 2.42E-13         | 656                |
|               | Cell Death                              | 1.73E-12         | 823                |
|               | Expression Of Rna                       | 4.31E-12         | 551                |
|               | Mammary gland                           | Organismal Death | 3.60E-18           |

|                                |          |      |
|--------------------------------|----------|------|
| Proliferation Of Cells         | 1.41E-14 | 878  |
| Malignant Solid Tumor          | 1.41E-14 | 2197 |
| Epithelial Cancer              | 1.41E-14 | 1896 |
| Cancer                         | 1.42E-14 | 2282 |
| Solid Tumor                    | 3.56E-14 | 2209 |
| Neoplasia Of Epithelial Tissue | 3.56E-14 | 1926 |
| Necrosis                       | 7.71E-13 | 634  |
| Cell Death Of Tumor Cell Lines | 1.61E-12 | 399  |
| Cell Death                     | 2.44E-12 | 797  |
| Expression Of Rna              | 9.32E-12 | 533  |

---

**Table S7.** Correlation between feed efficiency and microRNAs in dairy rumen, duodenum, jejunum, liver, and mammary gland under different diets.

| Tissue | Di et | miRNA  | Phenotype (P<0.05) |                     |                    | Positive/negative associated with traits | AL vs RS |                      | RS vs CS |                      | AL vs CS |                      |           |
|--------|-------|--------|--------------------|---------------------|--------------------|------------------------------------------|----------|----------------------|----------|----------------------|----------|----------------------|-----------|
|        |       |        | Feed efficiency    | Nitrogen efficiency | Milk urea nitrogen |                                          | P        | log2(folde r change) | P        | log2(folde r change) | P        | log2(folde r change) |           |
|        | A     | miR-66 |                    | 0.860195            |                    |                                          | 0.1      |                      | 0.6      |                      | 0.2      |                      |           |
| Rumen  | L     | 0      | -                  | 741                 | -                  | Positive                                 | 2        | -0.20                | 3        | 0.03                 | 3        | -0.17                |           |
|        | A     | miR-23 |                    |                     |                    |                                          | 0.8      |                      | 0.8      |                      | 0.9      |                      |           |
| Rumen  | L     | 32     | -                  | -                   |                    | Positive                                 | 5        | 0.20                 | 0        | -0.23                | 9        | -0.02                |           |
|        | A     | miR-24 |                    |                     |                    |                                          | 0.8      |                      | 0.8      |                      | 0.9      |                      |           |
| Rumen  | L     | 11-3p  | -                  | -                   | 9                  | Positive                                 | 3        | 0.21                 | 4        | -0.14                | 4        | 0.07                 |           |
|        | A     | miR-34 |                    |                     |                    |                                          | 0.0      |                      | 0.6      |                      | 0.1      |                      |           |
| Rumen  | L     | 5-3p   | -                  | -                   | 631                | Positive                                 | 4        | -0.50                | 8        | 0.08                 | 2        | -0.43                |           |
|        | A     | miR-22 |                    |                     |                    |                                          | 0.6      |                      | 0.6      |                      | 0.5      |                      |           |
| Rumen  | L     | 84x    | -                  | -                   | 236                | Positive                                 | 4        | 0.10                 | 2        | 0.04                 | 3        | 0.14                 |           |
|        | A     | miR-37 |                    |                     |                    |                                          | 0.7      |                      | 0.1      |                      | 0.3      |                      |           |
| Rumen  | L     | 8b     | -                  | -                   | 971                | Positive                                 | 5        | 0.08                 | 2        | -0.32                | 6        | -0.24                | Rumen(Up) |
|        | A     | miR-37 |                    |                     |                    |                                          | 0.2      |                      | 0.1      |                      | 0.0      |                      |           |
| Rumen  | L     | 8      | -                  | -                   | 147                | Positive                                 | 7        | -0.19                | 6        | -0.26                | 3        | -0.46                | Rumen(Up) |
|        | A     | miR-13 | 0.83866            | 0.816061            |                    |                                          | 0.0      |                      | 0.1      |                      | 0.6      |                      |           |
| Rumen  | L     | 0a     | 3266               | 23                  | -                  | Positive                                 | 3        | -0.28                | 3        | 0.20                 | 6        | -0.08                |           |
|        | A     | miR-26 |                    |                     |                    |                                          | 0.1      |                      | 0.1      |                      | 0.8      |                      |           |
| Rumen  | L     | b      | -                  | 925                 | -                  | Positive                                 | 3        | -0.23                | 1        | 0.20                 | 8        | -0.03                |           |
|        | A     | miR-16 |                    |                     |                    |                                          | 0.0      |                      | 0.7      |                      | 0.0      |                      |           |
| Rumen  | L     | b      | -                  | 83                  | -                  | Positive                                 | 7        | -0.34                | 2        | -0.04                | 7        | -0.39                |           |
| Rumen  | A     | miR-12 | 0.87180            | 0.852690            | -                  | Positive                                 | 0.3      | -0.21                | 0.3      | 0.18                 | 0.8      | -0.03                |           |

|       |   |        |         |           |     |          |     |       |     |       |             |       |             |
|-------|---|--------|---------|-----------|-----|----------|-----|-------|-----|-------|-------------|-------|-------------|
|       | L | 6-5p   | 2328    | 754       |     |          | 2   | 5     | 9   |       |             |       |             |
|       | A | miR-22 |         | 0.853611  |     |          | 0.0 | 0.8   | 0.0 |       | Rumen(Speci |       |             |
| Rumen | L | 99-3p  | -       | 268       | -   | Positive | 9   | -0.83 | 4   | 0.00  | 6           | -0.83 | fic)        |
|       | A | miR-61 |         | 0.854564  |     |          | 0.1 | 0.4   | 0.0 |       |             |       |             |
| Rumen | L | 23     | -       | 557       | -   | Positive | 4   | -0.27 | 1   | -0.15 | 8           | -0.42 |             |
|       | A | miR-18 |         | 0.862239  |     |          | 0.0 | 0.3   | 0.0 |       |             |       |             |
| Rumen | L | 1d     | -       | 651       | -   | Positive | 6   | -0.26 | 3   | 0.12  | 8           | -0.14 |             |
|       | A | miR-23 | 0.93358 | 0.862844  |     |          | 0.5 | 0.0   | 0.0 |       |             |       |             |
| Rumen | L | 76     | 3849    | 117       | -   | Positive | 7   | 0.21  | 3   | -0.82 | 7           | -0.62 |             |
|       | A | miR-61 |         | 0.866912  |     |          | 0.0 | 0.6   | 0.0 |       |             |       |             |
| Rumen | L | 19-5p  | -       | 636       | -   | Positive | 6   | -0.55 | 7   | 0.07  | 5           | -0.48 |             |
|       | A | miR-65 |         | 0.931872  |     |          | 0.7 | 0.9   | 0.7 |       |             |       |             |
| Rumen | L | 2      | -       | 658       | -   | Positive | 2   | -0.11 | 8   | -0.01 | 5           | -0.12 |             |
|       | A | miR-33 | 0.81016 |           |     |          | 0.6 | 0.7   | 0.9 |       |             |       |             |
| Rumen | L | 5      | 6749    | -         | -   | Positive | 9   | -0.10 | 3   | 0.09  | 8           | -0.01 |             |
|       | A | miR-19 | 0.81936 |           |     |          | 0.9 | 0.2   | 0.2 |       |             |       |             |
| Rumen | L | 2      | 2592    | -         | -   | Positive | 0   | 0.02  | 5   | -0.18 | 2           | -0.16 |             |
|       | A | miR-61 | 0.86295 |           |     |          | 0.0 | 0.0   | 0.3 |       |             |       |             |
| Rumen | L | 20-3p  | 8742    | -         | -   | Positive | 1   | -0.64 | 4   | 0.42  | 5           | -0.22 |             |
|       | A | miR-23 | 0.94363 |           |     |          | 0.3 | 0.9   | 0.4 |       |             |       |             |
| Rumen | L | 46     | 1573    | -         | -   | Positive | 1   | -0.49 | 1   | 0.04  | 5           | -0.44 |             |
|       | A | miR-48 |         | -0.827917 |     |          | 0.2 | 0.3   | 0.8 |       |             |       |             |
| Rumen | L | 6      | -       | -         | 489 | Negative | 2   | 0.66  | 0   | -0.58 | 7           | 0.08  |             |
|       | A | miR-48 |         | -0.819711 |     |          | 0.5 | 0.2   | 0.7 |       |             |       |             |
| Rumen | L | 4      | -       | -         | 329 | Negative | 5   | 0.12  | 0   | -0.19 | 3           | -0.08 |             |
|       | A | miR-12 | -0.8213 | -0.922619 |     |          | 0.7 | 0.5   | 0.3 |       |             |       |             |
| Rumen | L | 96     | 24046   | 737       | -   | Negative | 6   | -0.07 | 2   | -0.11 | 1           | -0.18 |             |
| Rumen | A | miR-23 | -       | -0.914016 | -   | Negative | 0.2 | 1.24  | 0.1 | -0.71 | 0.5         | 0.53  | Rumen(Speci |

|       |   |        |   |           |     |          |     |       |     |       |     |             |
|-------|---|--------|---|-----------|-----|----------|-----|-------|-----|-------|-----|-------------|
|       | L | 87     |   | 374       |     | 3        |     | 1     |     | 1     |     | fic)        |
|       | A | miR-37 |   | -0.844973 |     | 0.2      |     | 0.9   |     | 0.3   |     |             |
| Rumen | L | 9      | - | 1         | -   | Negative | 5   | 1.09  | 3   | -0.07 | 2   | 1.02        |
|       | A |        |   | -0.827354 |     |          | 0.1 | 0.0   |     | 0.9   |     |             |
| Rumen | L | miR-7  | - | 199       | -   | Negative | 8   | 0.54  | 3   | -0.50 | 1   | 0.03        |
|       | A | miR-24 |   | -0.822645 |     |          | 0.3 | 0.7   |     | 0.3   |     | Rumen(Speci |
| Rumen | L | 25-5p  | - | 303       | -   | Negative | 1   | 1.06  | 7   | -0.13 | 7   | 0.94        |
|       | A | miR-49 |   | -0.819513 |     |          | 0.7 | 0.6   |     | 0.9   |     | fic)        |
| Rumen | L | 1      | - | 06        | -   | Negative | 1   | 0.17  | 3   | -0.17 | 8   | 0.00        |
|       | A |        |   | -0.818840 |     |          | 0.3 | 0.7   |     | 0.4   |     |             |
| Rumen | L | miR-1  | - | 46        | -   | Negative | 6   | 1.40  | 0   | -0.24 | 0   | 1.16        |
|       | C | miR-13 |   | 0.850884  |     |          | 0.0 | 0.3   |     | 0.0   |     |             |
| Rumen | S | 0b     | - | -         | 72  | Positive | 0   | -0.77 | 9   | -0.18 | 1   | -0.95       |
|       | C | miR-30 |   | 0.858901  |     |          | 0.1 | 0.1   |     | 0.6   |     |             |
| Rumen | S | a-5p   | - | -         | 214 | Positive | 8   | 0.23  | 6   | -0.15 | 3   | 0.08        |
|       | C | miR-13 |   | 0.816963  |     |          | 0.0 | 0.2   |     | 0.1   |     |             |
| Rumen | S | 8      | - | 946       | -   | Positive | 2   | -1.03 | 6   | 0.42  | 7   | -0.62       |
|       | C | miR-30 |   | 0.829365  |     |          | 0.0 | 0.2   |     | 0.1   |     |             |
| Rumen | S | 1a     | - | 703       | -   | Positive | 4   | -0.40 | 6   | 0.11  | 2   | -0.28       |
|       | C |        |   | 0.831316  |     |          | 0.0 | 0.6   |     | 0.0   |     |             |
| Rumen | S | miR-93 | - | 326       | -   | Positive | 2   | -0.39 | 9   | 0.05  | 3   | -0.34       |
|       | C | miR-87 |   | 0.840341  |     |          | 0.0 | 0.4   |     | 0.2   |     | Rumen(Up)   |
| Rumen | S | 7      | - | 938       | -   | Positive | 5   | -0.56 | 5   | 0.18  | 1   | -0.38       |
|       | C | miR-10 |   | 0.854437  |     |          | 0.0 | 0.1   |     | 0.0   |     |             |
| Rumen | S | 3      | - | 391       | -   | Positive | 0   | -0.49 | 3   | 0.13  | 3   | -0.36       |
|       | C | miR-22 |   | 0.856305  |     |          | 0.2 | 0.4   |     | 0.1   |     |             |
| Rumen | S | 84b    | - | 204       | -   | Positive | 7   | 0.24  | 7   | 0.29  | 4   | 0.53        |
| Rumen | C | miR-54 | - | 0.861168  | -   | Positive | 0.8 | 0.10  | 0.2 | 0.27  | 0.3 | 0.37        |

|       |   |        |         |          |           |          |     |       |     |       |     |  |                 |
|-------|---|--------|---------|----------|-----------|----------|-----|-------|-----|-------|-----|--|-----------------|
|       | S | 5-3p   |         | 765      |           |          | 1   |       | 4   |       | 7   |  |                 |
|       | C | miR-10 |         | 0.868992 |           |          | 0.0 |       | 0.6 |       | 0.1 |  |                 |
| Rumen | S | 7      | -       | 043      | -         | Positive | 2   | -0.35 | 3   | 0.06  | 2   |  | -0.29           |
|       | C | miR-33 |         | 0.872153 |           |          | 0.6 |       | 0.7 |       | 0.9 |  |                 |
| Rumen | S | 5      | -       | 436      | -         | Positive | 9   | -0.10 | 3   | 0.09  | 8   |  | -0.01           |
|       | C | miR-22 |         | 0.926048 |           |          | 0.6 |       | 0.6 |       | 0.5 |  |                 |
| Rumen | S | 84x    | -       | 841      | -         | Positive | 4   | 0.10  | 2   | 0.04  | 3   |  | 0.14            |
|       | C | miR-14 |         |          |           |          | 0.2 |       | 0.2 |       | 0.7 |  |                 |
| Rumen | S | 7      | -       | 0.937943 | -         | Positive | 0   | -0.24 | 2   | 0.18  | 2   |  | -0.06 Rumen(Up) |
|       | C | miR-58 |         | 0.956953 |           |          | 0.1 |       | 0.8 |       | 0.4 |  |                 |
| Rumen | S | 2      | -       | 612      | -         | Positive | 8   | 0.15  | 4   | -0.03 | 8   |  | 0.13            |
|       | C | miR-45 | 0.81850 |          |           |          | 0.1 |       | 0.0 |       | 0.4 |  |                 |
| Rumen | S | 5-5p   | 538     | -        | -         | Positive | 9   | -0.22 | 3   | 0.34  | 8   |  | 0.12            |
|       | C | miR-24 | 0.85445 |          |           |          | 0.0 |       | 0.0 |       | 0.7 |  |                 |
| Rumen | S | 31-3p  | 3352    | -        | -         | Positive | 5   | 1.10  | 0   | -1.00 | 3   |  | 0.10            |
|       | C | miR-14 | 0.86704 |          |           |          | 0.0 |       | 0.3 |       | 0.0 |  |                 |
| Rumen | S | 0      | 6385    | -        | -         | Positive | 4   | -0.45 | 0   | 0.13  | 7   |  | -0.32           |
|       | C | miR-22 | 0.90612 |          |           |          | 0.0 |       | 0.3 |       | 0.0 |  |                 |
| Rumen | S | 84y    | 1668    | -        | -         | Positive | 5   | 1.10  | 4   | 0.13  | 4   |  | 1.23            |
|       | C | miR-29 | 0.92281 |          |           |          | 0.6 |       | 0.0 |       | 0.4 |  |                 |
| Rumen | S | c      | 1064    | -        | -         | Positive | 8   | -0.09 | 3   | 0.27  | 6   |  | 0.18            |
|       | C | miR-36 | 0.92825 |          |           |          | 0.2 |       | 0.1 |       | 0.7 |  |                 |
| Rumen | S | 2-3p   | 7749    | -        | -         | Positive | 1   | -0.45 | 1   | 0.34  | 8   |  | -0.11           |
|       | C | miR-12 |         |          | -0.940310 |          | 0.0 |       | 0.5 |       | 0.2 |  |                 |
| Rumen | S | 49     | -       | -        | 531       | Negative | 7   | -0.62 | 0   | 0.17  | 2   |  | -0.45           |
|       | C | miR-29 |         |          | -0.925167 |          | 0.2 |       | 0.2 |       | 1.0 |  |                 |
| Rumen | S | 04     | -       | -        | 695       | Negative | 4   | -0.59 | 2   | 0.59  | 0   |  | 0.00            |
| Rumen | C | miR-28 | -       | -        | -0.877797 | Negative | 0.0 | -1.66 | 0.2 | 0.61  | 0.0 |  | -1.05           |

|       |   |        |         |   |           |          |     |       |     |       |     |       |
|-------|---|--------|---------|---|-----------|----------|-----|-------|-----|-------|-----|-------|
|       | S | 87     |         |   | 315       |          | 5   |       | 7   |       | 8   |       |
|       | C | miR-41 |         |   | -0.841724 |          | 0.5 |       | 0.4 |       | 0.6 |       |
| Rumen | S | 1c-3p  | -       | - | 437       | Negative | 7   | -0.42 | 0   | 0.68  | 7   | 0.26  |
|       | C | miR-50 |         |   | -0.836241 |          | 0.0 |       | 0.6 |       | 0.2 |       |
| Rumen | S | 4      | -       | - | 525       | Negative | 1   | -0.68 | 7   | 0.12  | 0   | -0.56 |
|       | C | miR-12 |         |   | -0.832971 |          | 0.0 |       | 0.0 |       | 0.9 |       |
| Rumen | S | 60b    | -       | - | 249       | Negative | 2   | -0.75 | 1   | 0.72  | 0   | -0.03 |
|       | C | miR-37 |         |   | -0.830032 |          | 0.2 |       | 0.5 |       | 0.5 |       |
| Rumen | S | 6e     | -       | - | 367       | Negative | 9   | -0.68 | 5   | 0.34  | 9   | -0.34 |
|       | C | miR-37 |         |   | -0.820203 |          | 0.2 |       | 0.9 |       | 0.3 |       |
| Rumen | S | 9      | -       | - | 364       | Negative | 5   | 1.09  | 3   | -0.07 | 2   | 1.02  |
|       | C | miR-33 |         |   | -0.813215 |          | 0.0 |       | 0.1 |       | 0.0 |       |
| Rumen | S | 1      | -       | - | 458       | Negative | 0   | -1.06 | 1   | 0.34  | 1   | -0.72 |
|       | C | miR-10 |         |   | -0.904270 |          | 0.1 |       | 0.9 |       | 0.1 |       |
| Rumen | S | a      | -       |   | 768       | Negative | 1   | 0.41  | 5   | 0.01  | 5   | 0.42  |
|       | C | miR-27 |         |   | -0.901282 |          | 0.0 |       | 0.2 |       | 0.0 |       |
| Rumen | S | b      | -       |   | 071       | Negative | 1   | 0.30  | 3   | -0.11 | 7   | 0.19  |
|       | C | miR-23 |         |   | -0.868055 |          | 0.7 |       | 0.7 |       | 0.5 |       |
| Rumen | S | 49     | -       |   | 792       | Negative | 9   | 0.11  | 9   | 0.12  | 9   | 0.22  |
|       | C | miR-14 |         |   | -0.859660 |          | 0.2 |       | 0.3 |       | 0.0 |       |
| Rumen | S | 6a     | -       |   | 962       | Negative | 7   | -0.37 | 0   | -0.22 | 6   | -0.60 |
|       | C | miR-99 | -0.8812 |   | -0.829890 |          | 0.0 |       | 0.3 |       | 0.0 |       |
| Rumen | S | b      | 04568   |   | 824       | Negative | 2   | 2.40  | 4   | -0.17 | 2   | 2.23  |
|       | C | miR-22 | -0.9664 |   |           |          | 0.0 |       | 0.4 |       | 0.3 |       |
| Rumen | S | 3      | 19612   | - |           | Negative | 4   | -1.39 | 7   | 0.45  | 1   | -0.94 |
|       | C | miR-19 | -0.9614 |   |           |          | 0.1 |       | 0.0 |       | 0.5 |       |
| Rumen | S | 1      | 99601   | - |           | Negative | 1   | 0.49  | 6   | -0.34 | 9   | 0.15  |
| Rumen | C | miR-12 | -0.9398 | - |           | Negative | 0.0 | 4.25  | 0.2 | -0.21 | 0.0 | 4.04  |

Rumen(Up)  
Rumen(Speci  
fic)

|       |   |        |         |          |          |          |     |       |     |       |     |             |      |
|-------|---|--------|---------|----------|----------|----------|-----|-------|-----|-------|-----|-------------|------|
|       | S | 71     | 44159   |          |          |          | 2   | 1     | 2   |       |     |             |      |
|       | C | miR-14 | -0.9309 |          |          |          | 0.0 | 0.3   | 0.0 |       |     |             |      |
| Rumen | S | 6b     | 24203   | -        | -        | Negative | 6   | -0.53 | 3   | -0.32 | 4   | -0.85       |      |
|       | C | miR-14 | -0.9116 |          |          |          | 0.2 | 0.0   | 0.9 |       |     |             |      |
| Rumen | S | 8b     | 80821   | -        | -        | Negative | 0   | 0.22  | 1   | -0.23 | 4   | -0.01       |      |
|       | C | miR-30 | -0.8616 |          |          |          | 0.5 | 0.1   | 0.6 |       |     |             |      |
| Rumen | S | b-3p   | 71238   | -        | -        | Negative | 7   | 0.26  | 9   | -0.42 | 6   | -0.15       |      |
|       | C | miR-22 | -0.8466 |          |          |          | 0.0 | 0.0   | 0.1 |       |     |             |      |
| Rumen | S | 85k    | 37693   | -        | -        | Negative | 2   | 1.30  | 4   | -0.71 | 7   | 0.59        |      |
|       | C | miR-22 | -0.8283 |          |          |          | 0.0 | 0.0   | 0.8 |       |     |             |      |
| Rumen | S | 85f    | 70327   | -        | -        | Negative | 1   | 0.48  | 0   | -0.44 | 0   | 0.04        |      |
|       | R | miR-36 |         |          | 0.813394 |          | 0.4 | 0.6   | 0.7 |       |     |             |      |
| Rumen | S | 9-5p   | -       | -        | 167      | Positive | 1   | -0.63 | 3   | 0.33  | 0   | -0.30       |      |
|       | R | miR-22 |         |          | 0.816177 |          | 0.0 | 0.8   | 0.0 |       |     | Rumen(Speci |      |
| Rumen | S | 99-3p  | -       | -        | 357      | Positive | 9   | -0.83 | 4   | 0.00  | 6   | -0.83       | fic) |
|       | R | miR-50 |         |          | 0.833421 |          | 0.0 | 0.6   | 0.2 |       |     |             |      |
| Rumen | S | 4      | -       | -        | 003      | Positive | 1   | -0.68 | 7   | 0.12  | 0   | -0.56       |      |
|       | R | miR-30 |         |          | 0.836946 |          | 0.5 | 0.1   | 0.6 |       |     |             |      |
| Rumen | S | b-3p   | -       | -        | 142      | Positive | 7   | 0.26  | 9   | -0.42 | 6   | -0.15       |      |
|       | R | miR-21 |         |          | 0.838352 |          | 0.2 | 0.0   | 0.0 |       |     |             |      |
| Rumen | S | 1      | -       | -        | 434      | Positive | 6   | 0.83  | 3   | -2.15 | 9   | -1.31       |      |
|       | R | miR-24 |         |          | 0.846324 |          | 0.7 | 0.5   | 0.4 |       |     |             |      |
| Rumen | S | 74     | -       | -        | 225      | Positive | 5   | -0.07 | 0   | -0.43 | 0   | -0.51       |      |
|       | R | miR-14 |         |          | 0.945421 |          | 0.0 | 0.0   | 0.3 |       |     |             |      |
| Rumen | S | 68     | -       | -        | 919      | Positive | 5   | 0.66  | 7   | -0.38 | 5   | 0.27        |      |
|       | R | miR-24 |         | 0.810343 |          |          | 0.6 | 0.0   | 0.2 |       |     | Rumen(Dow   |      |
| Rumen | S | 19-5p  | -       | 213      | -        | Positive | 0   | 0.23  | 9   | -0.62 | 6   | -0.39       | n)   |
| Rumen | R | miR-36 | 0.96587 | 0.842919 | -        | Positive | 0.2 | 0.34  | 0.2 | -0.16 | 0.4 | 0.18        |      |



|       |   |        |         |          |           |          |     |       |     |       |     |       |           |
|-------|---|--------|---------|----------|-----------|----------|-----|-------|-----|-------|-----|-------|-----------|
|       | S | 1      | 9926    | 341      |           | 0        | 1   | 9     |     |       |     |       |           |
|       | R | miR-50 |         | 0.856407 |           | 0.3      | 0.1 | 0.9   |     |       |     |       |           |
| Rumen | S | 2a     | -       | 014      | -         | Positive | 2   | -0.51 | 9   | 0.58  | 5   | 0.07  |           |
|       | R | miR-32 |         | 0.878410 |           |          | 0.0 | 0.7   |     | 0.0   |     |       |           |
| Rumen | S | 8      | -       | 199      | -         | Positive | 4   | 0.46  | 2   | -0.06 | 8   | 0.40  |           |
|       | R | miR-10 | 0.81986 | 0.938065 |           |          | 0.6 | 0.0   |     | 0.7   |     |       |           |
| Rumen | S | 1      | 3872    | 246      | -         | Positive | 3   | -0.16 | 1   | 0.30  | 0   | 0.14  |           |
|       | R | miR-32 | 0.87392 |          |           |          | 0.0 | 0.4   |     | 0.3   |     |       |           |
| Rumen | S | 4      | 4823    | -        | -         | Positive | 7   | -0.41 | 1   | 0.19  | 9   | -0.22 |           |
|       | R | miR-18 | 0.87822 |          |           |          | 0.0 | 0.2   |     | 0.1   |     |       |           |
| Rumen | S | 5      | 9456    | -        | -         | Positive | 3   | 0.77  | 6   | -0.29 | 5   | 0.47  |           |
|       | R | miR-15 | 0.89868 |          |           |          | 0.0 | 0.2   |     | 0.0   |     |       |           |
| Rumen | S | 3      | 572     | -        | -         | Positive | 2   | 1.58  | 0   | -0.42 | 5   | 1.17  |           |
|       | R | miR-30 | 0.92720 |          |           |          | 0.8 | 0.3   |     | 0.7   |     |       |           |
| Rumen | S | f      | 6075    | -        | -         | Positive | 8   | 0.04  | 6   | -0.12 | 7   | -0.07 |           |
|       | R | miR-24 |         |          | -0.942249 |          | 0.1 | 0.3   |     | 0.4   |     |       |           |
| Rumen | S | 31-5p  | -       | -        | 645       | Negative | 5   | -0.58 | 8   | 0.26  | 4   | -0.32 |           |
|       | R | miR-22 |         |          | -0.939555 |          | 0.0 | 0.6   |     | 0.0   |     |       |           |
| Rumen | S | 85p    | -       | -        | 912       | Negative | 2   | 0.80  | 6   | -0.12 | 7   | 0.68  |           |
|       | R | miR-70 |         |          | -0.881009 |          | 0.6 | 0.7   |     | 0.4   |     |       |           |
| Rumen | S | 8      | -       | -        | 526       | Negative | 3   | 0.17  | 1   | 0.12  | 6   | 0.29  | Rumen(Up) |
|       | R | miR-42 |         |          | -0.871909 |          | 0.1 | 0.0   |     | 0.2   |     |       |           |
| Rumen | S | 5-3p   | -       | -        | 428       | Negative | 2   | 0.80  | 3   | -0.29 | 6   | 0.51  |           |
|       | R | miR-19 |         |          | -0.870687 |          | 0.7 | 0.6   |     | 0.9   |     |       |           |
| Rumen | S | b      | -       | -        | 341       | Negative | 7   | -0.12 | 1   | 0.13  | 8   | 0.01  |           |
|       | R | miR-34 |         |          | -0.851278 |          | 0.6 | 0.3   |     | 0.8   |     |       |           |
| Rumen | S | 31     | -       | -        | 91        | Negative | 1   | -0.13 | 2   | 0.09  | 8   | -0.04 | Rumen(Up) |
| Rumen | R | miR-18 | -       | -        | -0.847735 | Negative | 0.1 | 1.06  | 0.1 | -0.21 | 0.2 | 0.85  |           |

|       |   |        |   |   |           |          |     |       |     |       |     |       |           |
|-------|---|--------|---|---|-----------|----------|-----|-------|-----|-------|-----|-------|-----------|
|       | S | 3      |   |   | 496       |          | 4   | 3     | 0   |       |     |       |           |
|       | R | miR-22 |   |   | -0.847059 |          | 0.8 | 0.6   | 0.7 |       |     |       |           |
| Rumen | S | 84n    | - | - | 822       | Negative | 8   | -0.13 | 7   | 0.28  | 8   | 0.14  |           |
|       | R | miR-23 |   |   | -0.846559 |          | 0.8 | 0.8   | 0.9 |       |     |       |           |
| Rumen | S | 32     | - | - | 414       | Negative | 5   | 0.20  | 0   | -0.23 | 9   | -0.02 |           |
|       | R | miR-18 |   |   | -0.837302 |          | 0.7 | 0.7   | 0.9 |       |     |       |           |
| Rumen | S | 1c     | - | - | 202       | Negative | 8   | -0.05 | 5   | 0.04  | 6   | -0.01 |           |
|       | R | miR-14 |   |   | -0.836072 |          | 0.2 | 0.0   | 0.9 |       |     |       |           |
| Rumen | S | 8b     | - | - | 775       | Negative | 0   | 0.22  | 1   | -0.23 | 4   | -0.01 |           |
|       | R | miR-20 |   |   | -0.811624 |          | 0.1 | 0.6   | 0.3 |       |     |       |           |
| Rumen | S | 5      | - | - | 777       | Negative | 5   | 0.29  | 3   | -0.09 | 5   | 0.20  |           |
|       | R | miR-65 |   |   | -0.907990 |          | 0.3 | 0.9   | 0.4 |       |     |       |           |
| Rumen | S | 24     | - |   | 21        | Negative | 8   | -0.15 | 9   | 0.00  | 1   | -0.16 |           |
|       | R | miR-14 |   |   | -0.858744 |          | 0.5 | 0.4   | 0.9 |       |     |       |           |
| Rumen | S | 9-5p   | - |   | 213       | Negative | 0   | -0.20 | 0   | 0.22  | 3   | 0.02  | Rumen(Up) |
|       | R | miR-18 |   |   | -0.847369 |          | 0.3 | 0.8   | 0.5 |       |     |       |           |
| Rumen | S | b      | - |   | 955       | Negative | 9   | 0.62  | 4   | -0.09 | 1   | 0.52  |           |
|       | R | miR-21 |   |   | -0.846933 |          | 0.0 | 0.7   | 0.0 |       |     |       |           |
| Rumen | S | -3p    | - |   | 456       | Negative | 3   | -0.75 | 7   | -0.06 | 1   | -0.81 | Rumen(Up) |
|       | R | miR-15 |   |   | -0.839930 |          | 0.0 | 0.0   | 0.0 |       |     |       |           |
| Rumen | S | 5      | - |   | 009       | Negative | 1   | -1.01 | 9   | 0.26  | 4   | -0.75 |           |
|       | R | miR-14 |   |   | -0.836764 |          | 0.0 | 0.0   | 0.0 |       |     |       |           |
| Rumen | S | 2-3p   | - |   | 737       | Negative | 2   | -0.71 | 4   | 0.19  | 7   | -0.52 |           |
|       | R |        |   |   | -0.835139 |          | 0.3 | 0.8   | 0.4 |       |     |       |           |
| Rumen | S | miR-25 | - |   | 285       | Negative | 3   | -0.08 | 8   | -0.02 | 5   | -0.10 |           |
|       | R | miR-22 |   |   | -0.827572 |          | 0.6 | 0.3   | 0.5 |       |     |       |           |
| Rumen | S | 84aa   | - |   | 6         | Negative | 4   | -0.09 | 5   | 0.19  | 3   | 0.10  |           |
| Rumen | R | miR-14 | - |   | -0.813965 | Negative | 0.0 | -0.53 | 0.3 | -0.32 | 0.0 | -0.85 |           |

|        |   |        |         |   |     |          |          |     |           |     |           |     |             |      |
|--------|---|--------|---------|---|-----|----------|----------|-----|-----------|-----|-----------|-----|-------------|------|
|        | S | 6b     |         |   | 151 |          |          | 6   |           | 3   |           | 4   |             |      |
|        | R | miR-14 | -0.8448 |   |     |          |          | 0.4 |           | 0.8 |           | 0.4 | Rumen(Speci |      |
| Rumen  | S | 34-3p  | 56017   | - | -   | Negative |          | 0   | -0.45     | 5   | 0.10      | 3   | -0.35       | fic) |
|        | R | miR-10 | -0.8269 |   |     |          |          | 0.0 |           | 0.1 |           | 0.0 |             |      |
| Rumen  | S | 3      | 27141   | - | -   | Negative |          | 0   | -0.49     | 3   | 0.13      | 3   | -0.36       |      |
|        |   |        |         |   |     |          |          | 0.5 |           |     |           | 0.8 |             |      |
| Duoden | A | miR-24 |         |   |     | 0.810982 |          | 89  | -0.241008 | 0.5 | 0.241008  | 88  |             |      |
| um     | L | 43     | -       | - |     | 665      | Positive | 7   | 1         | 15  | 1         | 5   | 0           |      |
|        |   |        |         |   |     |          |          | 0.1 |           | 0.7 |           | 0.1 |             |      |
| Duoden | A | miR-23 |         |   |     | 0.812296 |          | 02  | 0.209836  | 12  | -0.052327 | 60  | 0.157509    |      |
| um     | L | b-3p   | -       | - |     | 138      | Positive | 5   | 795       | 6   | 543       | 2   | 251         |      |
|        |   |        |         |   |     |          |          | 0.9 |           |     |           | 0.3 |             |      |
| Duoden | A | miR-19 |         |   |     | 0.812982 |          | 35  | 0.069041  | 0.3 | 0.833221  | 14  | 0.902263    |      |
| um     | L | 0a     | -       | - |     | 074      | Positive | 6   | 644       | 09  | 554       | 5   | 198         |      |
|        |   |        |         |   |     |          |          | 0.6 |           |     |           | 0.0 |             |      |
| Duoden | A | miR-34 |         |   |     | 0.813453 |          | 33  | 0.074989  | 0.1 | -0.233397 | 99  | -0.158408   |      |
| um     | L | 2      | -       | - |     | 674      | Positive | 1   | 375       | 28  | 794       | 7   | 419         |      |
|        |   |        |         |   |     |          |          |     |           | 0.2 |           |     |             |      |
| Duoden | A | miR-21 |         |   |     | 0.814748 |          | 0.6 | 0.106915  | 20  | -0.621488 | 0.3 | -0.514573   |      |
| um     | L | 9-5p   | -       | - |     | 819      | Positive | 84  | 204       | 5   | 377       | 11  | 173         |      |
|        |   |        |         |   |     |          |          | 0.5 |           | 0.1 |           | 0.3 |             |      |
| Duoden | A | miR-36 |         |   |     | 0.814758 |          | 81  | -0.094068 | 92  | 0.291105  | 91  | 0.197036    |      |
| um     | L | 5-3p   | -       | - |     | 008      | Positive | 4   | 324       | 5   | 171       | 1   | 847         |      |
|        |   |        |         |   |     |          |          | 0.3 |           | 0.0 |           | 0.3 |             |      |
| Duoden | A | miR-22 |         |   |     | 0.816938 |          | 51  | -0.153320 | 34  | 0.330241  | 12  | 0.176920    |      |
| um     | L | -3p    | -       | - |     | 566      | Positive | 5   | 778       | 8   | 345       | 2   | 568         |      |
| Duoden | A | miR-88 |         |   |     | 0.822157 |          | 0.2 | -0.415037 | 0.7 | 0.125530  | 0.4 | -0.289506   |      |
| um     | L | 5      | -       | - |     | 502      | Positive | 89  | 499       | 11  | 882       | 93  | 617         |      |

|        |   |        |   |   |          |     |           |     |           |     |           |
|--------|---|--------|---|---|----------|-----|-----------|-----|-----------|-----|-----------|
|        |   |        |   |   |          | 7   |           | 8   |           |     |           |
|        |   |        |   |   |          | 0.9 |           | 0.6 |           | 0.7 |           |
| Duoden | A | miR-36 |   |   | 0.822518 | 15  | 0.020037  | 85  | -0.068947 | 08  | -0.048909 |
| um     | L | 13     | - | - | 26       | 5   | 753       | 9   | 354       | 3   | 6         |
|        |   |        |   |   |          |     |           | 0.3 |           | 0.5 |           |
| Duoden | A | miR-37 |   |   | 0.822822 | 0.1 | 0.160663  | 28  | -0.107903 | 38  | 0.052759  |
| um     | L | 4b     | - | - | 9        | 78  | 432       | 8   | 998       | 8   | 434       |
|        |   |        |   |   |          | 0.5 |           | 0.4 |           | 0.9 |           |
| Duoden | A | miR-61 |   |   | 0.823510 | 68  | -0.116644 | 89  | 0.101538  | 52  | -0.015106 |
| um     | L | 19-3p  | - | - | 652      | 5   | 919       | 9   | 026       | 4   | 892       |
|        |   |        |   |   |          | 0.1 |           | 0.2 |           | 0.7 |           |
| Duoden | A | miR-29 |   |   | 0.825596 | 65  | -0.349334 | 08  | 0.272372  | 31  | -0.076961 |
| um     | L | d      | - | - | 822      | 5   | 252       | 8   | 27        | 7   | 982       |
|        |   |        |   |   |          | 0.4 |           | 0.2 |           | 0.6 |           |
| Duoden | A | miR-18 |   |   | 0.829384 | 84  | -0.185555 | 04  | 0.303392  | 33  | 0.117836  |
| um     | L | 8      | - | - | 432      | 8   | 653       | 8   | 143       | 8   | 49        |
|        |   |        |   |   |          | 0.5 |           | 0.9 |           | 0.4 |           |
| Duoden | A | miR-32 |   |   | 0.830851 | 29  | 0.144389  | 57  | 0.012711  | 43  | 0.157100  |
| um     | L | 4      | - | - | 898      | 9   | 909       | 3   | 052       | 5   | 961       |
|        |   |        |   |   |          | 0.4 |           | 0.6 |           | 0.8 |           |
| Duoden | A | miR-15 |   |   | 0.833766 | 97  | 0.113765  | 96  | -0.078838 | 32  | 0.034926  |
| um     | L | 2      | - | - | 091      | 4   | 11        | 5   | 518       | 6   | 592       |
|        |   |        |   |   |          | 0.2 |           | 0.6 |           | 0.8 |           |
| Duoden | A | miR-23 |   |   | 0.837978 | 00  | -0.289506 | 42  | 0.211504  | 42  | -0.078002 |
| um     | L | 76     | - | - | 483      | 3   | 617       | 5   | 105       | 1   | 512       |
|        |   |        |   |   |          | 0.9 |           | 0.6 |           | 0.5 |           |
| Duoden | A | miR-21 |   |   | 0.840868 | 72  | 0.006614  | 61  | 0.084647  | 62  | 0.091262  |
| um     | L | 4      | - | - | 146      | 6   | 844       | 7   | 826       | 3   | 67        |

|        |   |         |   |   |          |     |           |     |           |     |           |
|--------|---|---------|---|---|----------|-----|-----------|-----|-----------|-----|-----------|
|        |   |         |   |   |          | 0.6 |           |     | 0.1       |     |           |
| Duoden | A | miR-34  |   |   | 0.843690 | 34  | -0.095280 | 0.2 | 0.307089  | 66  | 0.211809  |
| um     | L | 32      | - | - | 338      | 5   | 503       | 12  | 586       | 9   | 082       |
|        |   |         |   |   |          |     |           |     |           |     |           |
|        |   |         |   |   |          |     |           | 0.0 |           | 0.0 |           |
| Duoden | A | let-7a- |   |   | 0.845262 | 0.5 | -0.100447 | 28  | 0.340437  | 93  | 0.239990  |
| um     | L | 5p      | - | - | 454      | 47  | 265       | 8   | 417       | 2   | 152       |
|        |   |         |   |   |          |     |           |     |           |     |           |
|        |   |         |   |   |          |     |           | 0.8 |           | 0.6 | 0.7       |
| Duoden | A | miR-29  |   |   | 0.845272 | 78  |           | 26  | 0.125530  | 72  | 0.125530  |
| um     | L | 03      | - | - | 175      | 5   | 0         | 9   | 882       | 9   | 882       |
|        |   |         |   |   |          |     |           |     |           |     |           |
|        |   |         |   |   |          |     |           | 0.0 |           | 0.0 |           |
| Duoden | A | miR-92  |   |   | 0.847287 | 79  | -0.264781 | 01  | 0.427462  | 0.2 | 0.162680  |
| um     | L | a       | - | - | 831      | 6   | 707       | 2   | 509       | 38  | 802       |
|        |   |         |   |   |          |     |           |     |           |     |           |
|        |   |         |   |   |          |     |           | 0.1 |           | 0.5 | 0.3       |
| Duoden | A | miR-15  |   |   | 0.850055 | 24  | -0.245350 | 37  | 0.103744  | 42  | -0.141606 |
| um     | L | a       | - | - | 995      | 6   | 515       | 1   | 167       | 6   | 348       |
|        |   |         |   |   |          |     |           |     |           |     |           |
|        |   |         |   |   |          |     |           | 0.2 |           | 0.0 | 0.7       |
| Duoden | A | miR-20  |   |   | 0.850683 | 80  | 0.229560  | 78  | -0.286829 | 84  | -0.057268 |
| um     | L | 0c      | - | - | 517      | 2   | 939       | 1   | 281       | 5   | 342       |
|        |   |         |   |   |          |     |           |     |           |     |           |
|        |   |         |   |   |          |     |           | 0.5 |           | 0.3 | 0.8       |
| Duoden | A | let-7a- |   |   | 0.852091 | 92  | -0.091895 | 90  | 0.133462  | 18  | 0.041566  |
| um     | L | 3p      | - | - | 371      | 2   | 866       | 8   | 359       | 8   | 493       |
|        |   |         |   |   |          |     |           |     |           |     |           |
|        |   |         |   |   |          |     |           | 0.3 |           | 0.8 | 0.3       |
| Duoden | A | miR-15  |   |   | 0.852273 | 52  | -0.307011 | 15  | -0.114130 | 97  | -0.421141 |
| um     | L | 0       | - | - | 189      | 9   | 582       | 9   | 399       | 4   | 981       |
|        |   |         |   |   |          |     |           |     |           |     |           |
|        |   |         |   |   |          |     |           | 0.9 |           | 0.7 |           |
| Duoden | A | miR-15  |   |   | 0.854291 | 0.7 | -0.087462 | 35  | -0.082462 | 88  | -0.169925 |
| um     | L | 4b      | - | - | 492      | 9   | 841       | 2   | 16        | 1   | 001       |
|        |   |         |   |   |          |     |           |     |           |     |           |
| Duoden | A | miR-36  | - | - | 0.857537 | 0.7 | -0.039892 | 0.9 | -0.013056 | 0.6 | -0.052948 |

|        |   |        |   |   |          |          |     |           |     |           |     |           |
|--------|---|--------|---|---|----------|----------|-----|-----------|-----|-----------|-----|-----------|
| um     | L | 2-3p   |   |   | 303      |          | 48  | 727       | 30  | 153       | 77  | 88        |
|        |   |        |   |   |          |          | 4   |           | 6   |           | 6   |           |
|        |   |        |   |   |          |          | 0.6 |           | 0.5 |           |     |           |
| Duoden | A | miR-45 |   |   | 0.862009 |          | 51  | -0.078297 | 27  | 0.104735  | 0.8 | 0.026437  |
| um     | L | 5-3p   | - | - | 356      | Positive | 7   | 934       | 7   | 494       | 43  | 56        |
|        |   |        |   |   |          |          | 0.8 |           | 0.0 |           | 0.0 |           |
| Duoden | A |        |   |   | 0.864873 |          | 31  | -0.036536 | 81  | 0.303729  | 73  | 0.267192  |
| um     | L | let-7b | - | - | 631      | Positive | 9   | 155       | 6   | 076       | 7   | 921       |
|        |   |        |   |   |          |          | 0.9 |           | 0.2 |           | 0.2 |           |
| Duoden | A |        |   |   | 0.865617 |          | 96  | 0.000509  | 18  | 0.141408  | 35  | 0.141918  |
| um     | L | let-7g | - | - | 627      | Positive | 9   | 172       | 2   | 898       | 6   | 07        |
|        |   |        |   |   |          |          | 0.6 |           |     |           | 0.5 |           |
| Duoden | A | miR-10 |   |   | 0.866894 |          | 27  | 0.072491  | 0.1 | -0.162659 | 44  | -0.090167 |
| um     | L | 6b     | - | - | 296      | Positive | 5   | 871       | 67  | 362       | 3   | 491       |
|        |   |        |   |   |          |          | 0.2 |           | 0.4 |           | 0.8 |           |
| Duoden | A | miR-27 |   |   | 0.868068 |          | 72  | -0.136131 | 07  | 0.114846  | 37  | -0.021285 |
| um     | L | a-3p   | - | - | 927      | Positive | 8   | 483       | 4   | 232       | 8   | 251       |
|        |   |        |   |   |          |          |     |           |     |           | 0.9 |           |
| Duoden | A |        |   |   | 0.871626 |          | 0.7 | -0.034309 | 0.7 | 0.024441  | 23  | -0.009867 |
| um     | L | miR-93 | - | - | 533      | Positive | 12  | 144       | 26  | 238       | 6   | 906       |
|        |   |        |   |   |          |          | 0.3 |           | 0.9 |           | 0.3 |           |
| Duoden | A | miR-17 |   |   | 0.873529 |          | 43  | -0.135959 | 96  |           | 57  | -0.135959 |
| um     | L | -3p    | - | - | 074      | Positive | 6   | 709       | 5   | 0         | 2   | 709       |
|        |   |        |   |   |          |          |     |           | 0.2 |           | 0.1 |           |
| Duoden | A | miR-15 |   |   | 0.874984 |          | 0.9 | 0.034194  | 81  | -0.377282 | 29  | -0.343087 |
| um     | L | 3      | - | - | 947      | Positive | 17  | 92        | 3   | 577       | 7   | 657       |
| Duoden | A | miR-22 |   |   | 0.878602 |          | 0.3 | 0.169925  | 0.3 | -0.321928 | 0.6 | -0.152003 |
| um     | L | 84t-3p | - | - | 664      | Positive | 85  | 001       | 45  | 095       | 38  | 093       |

|        |   |        |   |   |          |          |     |           |     |           |     |           |
|--------|---|--------|---|---|----------|----------|-----|-----------|-----|-----------|-----|-----------|
|        |   |        |   |   |          |          | 5   | 8         | 6   |           |     |           |
|        |   |        |   |   |          |          | 0.0 | 0.2       | 0.4 |           |     |           |
| Duoden | A | miR-65 |   |   | 0.882800 |          | 71  | 0.337034  | 28  | -0.211504 | 18  | 0.125530  |
| um     | L | 23     | - | - | 251      | Positive | 7   | 987       | 1   | 105       | 7   | 882       |
|        |   |        |   |   |          |          | 0.1 | 0.8       |     |           | 0.1 |           |
| Duoden | A | miR-54 |   |   | 0.885762 |          | 65  | -0.374395 | 54  | 0.041820  | 74  | -0.332575 |
| um     | L | 2-5p   | - | - | 694      | Positive | 1   | 515       | 2   | 176       | 8   | 339       |
|        |   |        |   |   |          |          | 0.6 | 0.6       |     |           | 0.9 |           |
| Duoden | A | miR-18 |   |   | 0.887670 |          | 80  | -0.036530 | 36  | 0.042357  | 38  | 0.005827  |
| um     | L | 6      | - | - | 904      | Positive | 8   | 37        | 7   | 565       | 7   | 195       |
|        |   |        |   |   |          |          | 0.9 | 0.2       |     |           | 0.2 |           |
| Duoden | A | miR-41 |   |   | 0.887872 |          | 75  | -0.004274 | 44  | 0.225953  | 04  | 0.221679  |
| um     | L | 0      | - | - | 33       | Positive | 5   | 655       | 1   | 754       | 5   | 099       |
|        |   |        |   |   |          |          |     |           | 0.0 |           | 0.2 |           |
| Duoden | A | miR-87 |   |   | 0.891740 |          | 0.1 | -0.464403 | 11  | 0.790904  | 36  | 0.326500  |
| um     | L | 7      | - | - | 562      | Positive | 48  | 577       | 7   | 401       | 6   | 825       |
|        |   |        |   |   |          |          | 0.1 |           | 0.4 |           | 0.4 |           |
| Duoden | A | miR-30 |   |   | 0.892497 |          | 37  | -0.175530 | 50  | 0.078948  | 14  | -0.096581 |
| um     | L | c      | - | - | 828      | Positive | 4   | 175       | 8   | 273       | 7   | 902       |
|        |   |        |   |   |          |          | 0.8 |           | 0.3 |           | 0.4 |           |
| Duoden | A | miR-30 |   |   | 0.893313 |          | 19  | -0.039946 | 00  | 0.150182  | 35  | 0.110236  |
| um     | L | b-5p   | - | - | 505      | Positive | 6   | 286       | 8   | 457       | 3   | 171       |
|        |   |        |   |   |          |          | 0.0 |           | 0.0 |           | 0.9 |           |
| Duoden | A | miR-32 |   |   | 0.893999 |          | 40  | -0.669354 | 36  | 0.669354  | 76  |           |
| um     | L | 8      | - | - | 514      | Positive | 1   | 688       | 3   | 688       | 6   | 0         |
|        |   |        |   |   |          |          | 0.3 |           | 0.5 |           | 0.6 |           |
| Duoden | A | miR-22 |   |   | 0.900193 |          | 81  | 0.117335  | 39  | -0.053860 | 70  | 0.063474  |
| um     | L | 1      | - | - | 569      | Positive | 9   | 281       | 1   | 648       | 8   | 633       |

|        |   |        |   |   |          |          |     |           |     |           |     |           |
|--------|---|--------|---|---|----------|----------|-----|-----------|-----|-----------|-----|-----------|
| Duoden | A | miR-20 |   |   | 0.902021 |          | 0.7 |           | 0.6 |           | 0.4 |           |
| um     | L | 0b     | - | - | 907      | Positive | 43  | -0.046606 | 13  | -0.075454 | 10  | -0.122060 |
|        |   |        |   |   |          |          | 5   | 768       | 8   | 01        | 5   | 778       |
| Duoden | A | miR-12 |   |   | 0.904171 |          | 0.1 |           | 0.2 |           | 0.3 |           |
| um     | L | 96     | - | - | 252      | Positive | 06  | -0.432959 | 27  | 0.231325  | 88  | -0.201633 |
|        |   |        |   |   |          |          | 8   | 407       | 6   | 546       | 3   | 861       |
| Duoden | A | miR-50 |   |   | 0.905423 |          | 0.7 |           | 0.4 |           | 0.7 |           |
| um     | L | 5      | - | - | 573      | Positive | 76  | -0.055087 | 46  | 0.116863  | 23  | 0.061776  |
|        |   |        |   |   |          |          | 7   | 56        | 3   | 758       | 4   | 198       |
| Duoden | A | miR-30 |   |   | 0.906172 |          |     |           | 0.4 |           | 0.7 |           |
| um     | L | b-3p   | - | - | 43       | Positive | 0.5 | -0.222392 | 78  | 0.347923  | 19  | 0.125530  |
|        |   |        |   |   |          |          | 71  | 421       | 3   | 303       | 9   | 882       |
| Duoden | A | miR-19 |   |   | 0.906311 |          | 0.9 |           | 0.4 |           | 0.3 |           |
| um     | L | 3a-5p  | - | - | 928      | Positive | 71  |           | 15  | 0.236067  | 12  | 0.236067  |
|        |   |        |   |   |          |          | 8   | 0         | 7   | 358       | 4   | 358       |
| Duoden | A | miR-13 |   |   | 0.909205 |          | 0.3 |           | 0.3 |           | 0.8 |           |
| um     | L | 06     | - | - | 63       | Positive | 59  | -0.325400 | 28  | 0.257496  | 05  | -0.067904 |
|        |   |        |   |   |          |          | 7   | 287       | 7   | 222       | 2   | 065       |
| Duoden | A | miR-34 |   |   | 0.912161 |          | 0.0 |           | 0.0 |           | 0.8 |           |
| um     | L | a      | - | - | 491      | Positive | 08  | 0.329722  | 76  | -0.351936 | 85  | -0.022214 |
|        |   |        |   |   |          |          | 5   | 252       | 6   | 986       | 9   | 734       |
| Duoden | A | miR-57 |   |   | 0.913736 |          | 0.7 |           |     |           | 0.6 |           |
| um     | L | 4      | - | - | 896      | Positive | 23  | -0.082819 | 0.2 | 0.174107  | 95  | 0.091287  |
|        |   |        |   |   |          |          | 2   | 528       | 45  | 28        | 3   | 752       |
| Duoden | A | miR-21 |   |   | 0.915042 |          | 0.2 |           | 0.0 |           | 0.8 |           |
| um     | L | 0      | - | - | 284      | Positive | 35  | -0.224462 | 92  | 0.276124  | 12  | 0.051662  |
|        |   |        |   |   |          |          | 7   | 285       | 9   | 405       | 1   | 12        |
| Duoden | A | miR-44 | - | - | 0.916034 | Positive | 0.8 | 0.061400  | 0.6 | 0.131244  | 0.4 | 0.192645  |



|        |   |        |   |   |          |          |     |           |     |           |     |           |
|--------|---|--------|---|---|----------|----------|-----|-----------|-----|-----------|-----|-----------|
| um     | L | 9a     |   |   | 326      |          | 90  | 545       | 39  | 533       | 03  | 078       |
|        |   |        |   |   |          |          | 5   |           | 8   |           | 9   |           |
|        |   |        |   |   |          |          | 0.1 |           | 0.0 |           | 0.6 |           |
| Duoden | A | miR-42 |   |   | 0.918202 |          | 65  | -0.460751 | 67  | 0.592585  | 16  | 0.131834  |
| um     | L | 3-3p   | - | - | 096      | Positive | 2   | 098       | 9   | 536       | 9   | 439       |
|        |   |        |   |   |          |          | 0.9 |           | 0.2 |           | 0.2 |           |
| Duoden | A | miR-65 |   |   | 0.920092 |          | 60  | -0.008752 | 97  | 0.172836  | 19  | 0.164084  |
| um     | L | 2      | - | - | 86       | Positive | 2   | 474       | 1   | 597       | 9   | 123       |
|        |   |        |   |   |          |          | 0.0 |           | 0.0 |           | 0.6 |           |
| Duoden | A | miR-42 |   |   | 0.922849 |          | 34  | -0.399520 | 61  | 0.297556  | 02  | -0.101964 |
| um     | L | 3-5p   | - | - | 551      | Positive | 1   | 581       | 7   | 22        | 4   | 361       |
|        |   |        |   |   |          |          | 0.1 |           | 0.2 |           | 0.4 |           |
| Duoden | A | miR-33 |   |   | 0.924549 |          | 10  | -0.292747 | 07  | 0.193548  | 85  | -0.099198 |
| um     | L | 9a     | - | - | 264      | Positive | 6   | 393       | 2   | 444       | 5   | 949       |
|        |   |        |   |   |          |          |     |           | 0.1 |           | 0.7 |           |
| Duoden | A | miR-49 |   |   | 0.926215 |          | 0.1 | -0.372564 | 68  | 0.416247  | 77  | 0.043683  |
| um     | L | 7      | - | - | 204      | Positive | 89  | 401       | 3   | 734       | 2   | 333       |
|        |   |        |   |   |          |          | 0.1 |           | 0.2 |           | 0.5 |           |
| Duoden | A | miR-22 |   |   | 0.930944 |          | 39  | -0.248947 | 84  | 0.131019  | 44  | -0.117928 |
| um     | L | 2      | - | - | 539      | Positive | 7   | 47        | 7   | 018       | 8   | 451       |
|        |   |        |   |   |          |          | 0.2 |           | 0.1 |           | 0.4 |           |
| Duoden | A | miR-76 |   |   | 0.936235 |          | 39  | -0.145157 | 05  | 0.224823  | 87  | 0.079666  |
| um     | L | 9      | - | - | 135      | Positive | 9   | 096       | 7   | 248       | 8   | 151       |
|        |   |        |   |   |          |          | 0.5 |           | 0.9 |           | 0.3 |           |
| Duoden | A | miR-23 |   |   | 0.940364 |          | 73  | -0.072346 | 21  | -0.013874 | 22  | -0.086221 |
| um     | L | a      | - | - | 759      | Positive | 8   | 78        | 6   | 897       | 4   | 677       |
| Duoden | A | miR-12 |   |   | 0.940664 |          | 0.2 | -0.493332 | 0.0 | 0.596836  | 0.7 | 0.103504  |
| um     | L | 49     | - | - | 233      | Positive | 03  | 025       | 74  | 601       | 11  | 576       |

|        |   |        |   |   |          |     |           |     |           |     |           |
|--------|---|--------|---|---|----------|-----|-----------|-----|-----------|-----|-----------|
|        |   |        |   |   |          | 6   |           | 8   |           | 4   |           |
|        |   |        |   |   |          | 0.0 |           | 0.0 |           | 0.6 |           |
| Duoden | A | miR-13 |   |   | 0.941824 | 51  | -0.449856 | 06  | 0.545968  | 70  | 0.096111  |
| um     | L | 07     | - | - | 408      | 9   | 477       | 2   | 369       | 1   | 893       |
|        |   |        |   |   |          | 0.2 |           | 0.4 |           | 0.5 |           |
| Duoden | A | miR-29 |   |   | 0.941957 | 50  | 0.152549  | 64  | -0.094019 | 62  | 0.058529  |
| um     | L | b      | - | - | 783      | 3   | 465       | 7   | 909       | 3   | 556       |
|        |   |        |   |   |          | 0.1 |           | 0.0 |           | 0.8 |           |
| Duoden | A | miR-33 |   |   | 0.942487 | 17  | -0.272569 | 90  | 0.254317  | 78  | -0.018252 |
| um     | L | 9b     | - | - | 774      | 7   | 768       | 7   | 189       | 9   | 579       |
|        |   |        |   |   |          |     |           | 0.0 |           | 0.0 |           |
| Duoden | A | miR-34 |   |   | 0.950959 | 0.7 | 0.046626  | 25  | 0.265142  | 54  | 0.311768  |
| um     | L | 5-3p   | - | - | 897      | 27  | 16        | 7   | 069       | 1   | 229       |
|        |   |        |   |   |          |     |           | 0.0 |           | 0.8 |           |
| Duoden | A | miR-19 |   |   | 0.952199 | 0.0 | -0.304233 | 91  | 0.281856  | 74  | -0.022376 |
| um     | L | 9b     | - | - | 411      | 35  | 097       | 6   | 556       | 7   | 541       |
|        |   |        |   |   |          |     |           | 0.0 |           | 0.1 |           |
| Duoden | A | miR-14 |   |   | 0.955298 | 0.3 | -0.174833 | 13  | 0.436099  | 86  | 0.261265  |
| um     | L | 9-5p   | - | - | 435      | 49  | 802       | 7   | 115       | 5   | 313       |
|        |   |        |   |   |          | 0.9 |           | 0.7 |           |     |           |
| Duoden | A |        |   |   | 0.959253 | 61  | 0.008460  | 48  | 0.046508  | 0.7 | 0.054968  |
| um     | L | let-7d | - | - | 788      | 3   | 075       | 4   | 866       | 17  | 941       |
|        |   |        |   |   |          | 0.0 |           | 0.1 |           |     |           |
| Duoden | A | miR-65 |   |   | 0.962390 | 83  | 0.536052  | 99  | -0.536052 | 0.9 |           |
| um     | L | 4      | - | - | 23       | 1   | 9         | 7   | 9         | 51  | 0         |
|        |   |        |   |   |          |     |           | 0.0 |           | 0.7 |           |
| Duoden | A | miR-32 |   |   | 0.970013 | 0.1 | -0.290571 | 83  | 0.342186  | 46  | 0.051615  |
| um     | L | 0a     | - | - | 577      | 1   | 415       | 3   | 934       | 7   | 518       |

|        |   |        |         |          |          |          |     |           |     |           |     |           |
|--------|---|--------|---------|----------|----------|----------|-----|-----------|-----|-----------|-----|-----------|
| Duoden | A | miR-15 |         |          | 0.971892 |          | 0.7 |           | 0.9 |           | 0.7 |           |
| um     | L | b      | -       | -        | 256      | Positive | 93  | 0.052578  | 45  | 0.010124  | 49  | 0.062702  |
|        |   |        |         |          |          |          | 6   | 281       | 1   | 217       | 9   | 499       |
|        |   |        |         |          |          |          |     |           | 0.0 |           |     |           |
| Duoden | A | miR-33 |         |          | 0.973661 |          | 0.1 | -0.385834 | 65  | 0.413633  | 0.8 | 0.027798  |
| um     | L | 1      | -       | -        | 571      | Positive | 36  | 964       | 9   | 416       | 73  | 452       |
|        |   |        |         |          |          |          | 0.3 |           | 0.3 |           |     |           |
| Duoden | A | miR-12 |         |          | 0.975771 |          | 01  | -0.193413 | 26  | 0.200603  | 0.9 | 0.007190  |
| um     | L | 8      | -       | -        | 081      | Positive | 9   | 354       | 3   | 733       | 75  | 378       |
|        |   |        |         |          |          |          | 0.2 |           | 0.4 |           | 0.8 |           |
| Duoden | A | miR-25 | -       | -        | 0.978838 | Positive | 91  | -0.081355 | 57  | 0.065326  | 85  | -0.016028 |
| um     | L |        |         |          | 568      |          | 9   | 299       | 1   | 725       | 3   | 574       |
|        |   |        |         |          |          |          | 0.4 |           | 0.8 |           | 0.4 |           |
| Duoden | A | miR-67 |         |          | 0.979122 |          | 98  | 0.222392  | 75  | 0.026967  | 38  | 0.249359  |
| um     | L | 1      | -       | -        | 836      | Positive | 1   | 421       | 9   | 048       | 5   | 469       |
|        |   |        |         |          |          |          | 0.7 |           | 0.5 |           | 0.7 |           |
| Duoden | A | miR-26 |         |          | 0.986191 |          | 37  | -0.036859 | 34  | 0.063125  | 09  | 0.026266  |
| um     | L | b      | -       | -        | 707      | Positive | 2   | 449       | 4   | 451       | 3   | 001       |
|        |   |        |         |          |          |          | 0.3 |           | 0.1 |           | 0.8 |           |
| Duoden | A | miR-76 |         |          | 0.988567 |          | 61  | -0.351472 | 80  | 0.402098  | 89  | 0.050626  |
| um     | L | 0-3p   | -       | -        | 746      | Positive | 8   | 371       | 1   | 444       | 8   | 073       |
|        |   |        |         |          |          |          | 0.2 |           | 0.6 |           | 0.3 |           |
| Duoden | A | miR-48 |         |          | 0.990642 |          | 32  | -0.272969 | 01  | 0.110728  | 86  | -0.162241 |
| um     | L | 4      | -       | -        | 616      | Positive | 2   | 959       | 4   | 477       | 3   | 482       |
|        |   |        |         |          |          |          | 0.0 |           | 0.1 |           | 0.8 |           |
| Duoden | A | miR-23 | 0.87279 | 0.842397 |          |          | 09  | -0.261570 | 24  | 0.238347  | 82  | -0.023222 |
| um     | L | 36     | 6746    | 165      | -        | Positive | 8   | 484       | 7   | 527       | 3   | 957       |
| Duoden | A | miR-22 | 0.90800 | 0.844005 | -        | Positive | 0.0 | 1         | 0.0 | -0.652076 | 0.3 | 0.347923  |

|        |   |        |         |          |           |          |     |           |     |           |     |           |
|--------|---|--------|---------|----------|-----------|----------|-----|-----------|-----|-----------|-----|-----------|
| um     | L | 85l    | 7997    | 417      |           |          | 56  | 76        | 697 | 93        | 303 |           |
|        |   |        |         |          |           |          | 2   | 2         |     | 6         |     |           |
|        |   |        |         |          |           |          | 0.1 | 0.7       |     | 0.1       |     |           |
| Duoden | A | miR-24 | 0.97524 | 0.873785 |           |          | 79  | -0.700439 | 61  | -0.206450 | 39  | -0.906890 |
| um     | L | 83-5p  | 8074    | 105      | -         | Positive | 1   | 718       | 6   | 877       | 5   | 596       |
|        |   |        |         |          |           |          | 0.5 |           |     | 0.9       |     |           |
| Duoden | A | miR-37 |         | 0.908119 |           |          | 94  | 0.209718  | 0.5 | -0.243271 | 34  | -0.033552 |
| um     | L | 9      | -       | 303      | -         | Positive | 6   | 591       | 54  | 151       | 7   | 56        |
|        |   |        |         |          |           |          | 0.2 |           | 0.3 |           | 0.6 |           |
| Duoden | A |        | 0.81262 |          |           |          | 34  | 0.354108  | 92  | -0.255784 | 93  | 0.098323  |
| um     | L | miR-7  | 237     | -        | -         | Positive | 1   | 501       | 9   | 667       | 7   | 834       |
|        |   |        |         |          |           |          | 0.5 |           | 0.1 |           | 0.4 |           |
| Duoden | A | miR-22 | 0.81366 |          |           |          | 37  | -0.321928 | 54  | 0.862496  | 31  | 0.540568  |
| um     | L | 85i    | 7379    | -        | -         | Positive | 3   | 095       | 4   | 476       | 2   | 381       |
|        |   |        |         |          |           |          | 0.7 |           | 0.9 |           | 0.8 |           |
| Duoden | A | miR-48 | 0.84237 |          |           |          | 86  | -0.070389 | 37  | 0.027744  | 87  | -0.042644 |
| um     | L | 7b     | 1752    | -        | -         | Positive | 2   | 328       | 2   | 99        | 5   | 337       |
|        |   |        |         |          |           |          | 0.0 |           | 0.3 |           | 0.8 |           |
| Duoden | A | miR-12 | 0.89126 |          |           |          | 92  | 0.259895  | 53  | -0.306476 | 67  | -0.046580 |
| um     | L | 7      | 4436    | -        | -         | Positive | 3   | 862       | 9   | 467       | 6   | 605       |
|        |   |        |         |          |           |          | 0.4 |           | 0.8 |           | 0.7 |           |
| Duoden | A | miR-65 | 0.93357 |          |           |          | 40  | 0.175086  | 15  | -0.090197 | 65  | 0.084888  |
| um     | L | 5      | 9115    | -        | -         | Positive | 9   | 707       | 2   | 809       | 9   | 898       |
|        |   |        |         |          |           |          | 0.1 |           | 0.2 |           | 0.9 |           |
| Duoden | A | miR-48 |         |          | -0.969074 |          | 26  | -0.265358 | 53  | 0.279840  | 40  | 0.014481  |
| um     | L | 6      | -       | -        | 577       | Negative | 5   | 975       | 7   | 352       | 3   | 377       |
| Duoden | A | miR-10 |         |          | -0.906889 |          | 0.2 | -0.395545 | 0.1 | 0.521094  | 0.4 | 0.125549  |
| um     | L | 0      | -       | -        | 981       | Negative | 30  | 483       | 48  | 892       | 85  | 409       |

|        |   |        |         |           |           |          |     |           |     |           |     |           |
|--------|---|--------|---------|-----------|-----------|----------|-----|-----------|-----|-----------|-----|-----------|
|        |   |        |         |           |           |          | 9   | 5         | 1   |           |     |           |
|        |   |        |         |           |           |          | 0.5 |           | 0.8 |           |     |           |
| Duoden | A | miR-10 |         |           | -0.884770 |          | 21  | 0.121049  | 0.7 | -0.092438 | 95  | 0.028611  |
| um     | L | b      | -       | -         | 039       | Negative | 6   | 776       | 21  | 719       | 8   | 057       |
|        |   |        |         |           |           |          | 0.8 |           | 0.6 |           | 0.6 |           |
| Duoden | A | miR-12 |         |           | -0.875522 |          | 98  | -0.079226 | 88  | 0.278535  | 60  | 0.199308  |
| um     | L | 4a     | -       | -         | 747       | Negative | 5   | 691       | 4   | 499       | 2   | 808       |
|        |   |        |         |           |           |          | 0.8 |           | 0.6 |           | 0.6 |           |
| Duoden | A | miR-12 |         |           | -0.875522 |          | 98  | -0.079226 | 88  | 0.278535  | 60  | 0.199308  |
| um     | L | 4b     | -       | -         | 747       | Negative | 5   | 691       | 4   | 499       | 2   | 808       |
|        |   |        |         |           |           |          | 0.6 |           | 0.1 |           | 0.1 |           |
| Duoden | A | miR-21 |         |           | -0.825008 |          | 03  | 0.224443  | 41  | -0.578122 | 42  | -0.353679 |
| um     | L | 5      | -       | -         | 21        | Negative | 8   | 388       | 7   | 883       | 4   | 495       |
|        |   |        |         |           |           |          | 0.9 |           | 0.1 |           | 0.1 |           |
| Duoden | A | miR-61 | -0.9375 | -0.889658 |           |          | 58  |           | 71  | 0.205318  | 58  | 0.205318  |
| um     | L | 23     | 06875   | 443       | -         | Negative | 2   | 0         | 5   | 908       | 9   | 908       |
|        |   |        |         |           |           |          | 0.6 |           | 0.2 |           | 0.0 |           |
| Duoden | A | miR-14 |         | -0.848890 |           |          | 56  | 0.083000  | 74  | 0.228624  | 80  | 0.311624  |
| um     | L | 5      | -       | 303       | -         | Negative | 9   | 234       | 8   | 375       | 2   | 609       |
|        |   |        |         |           |           |          | 0.4 |           | 0.4 |           | 0.7 |           |
| Duoden | A | miR-13 | -0.8844 |           |           |          | 57  | 0.145850  | 30  | -0.226770 | 35  | -0.080919 |
| um     | L | 3b     | 15424   | -         | -         | Negative | 4   | 866       | 7   | 862       | 8   | 995       |
|        |   |        |         |           |           |          | 0.0 |           | 0.3 |           | 0.3 |           |
| Duoden | A | miR-19 | -0.8842 |           |           |          | 74  | -0.359620 | 35  | 0.194417  | 25  | -0.165202 |
| um     | L | 3b     | 57079   | -         | -         | Negative | 5   | 385       | 8   | 794       | 7   | 591       |
|        |   |        |         |           |           |          | 0.3 |           | 0.5 |           | 0.9 |           |
| Duoden | A | miR-22 | -0.8511 |           |           |          | 31  | 0.415037  | 01  | -0.415037 | 14  |           |
| um     | L | 85r    | 34433   | -         | -         | Negative | 5   | 499       | 3   | 499       | 4   | 0         |

|        |   |        |         |   |          |          |     |           |     |           |     |           |
|--------|---|--------|---------|---|----------|----------|-----|-----------|-----|-----------|-----|-----------|
|        |   |        |         |   |          |          | 0.0 |           | 0.0 |           | 0.8 |           |
| Duoden | C | miR-22 |         |   | 0.833202 |          | 58  | -0.240532 | 69  | 0.263383  | 41  | 0.022850  |
| um     | S | 84z    | -       | - | 808      | Positive | 7   | 407       | 7   | 346       | 2   | 939       |
|        |   |        |         |   |          |          | 0.1 |           | 0.5 |           | 0.0 |           |
| Duoden | C | miR-13 |         |   | 0.861116 |          | 40  | 0.299560  | 14  | 0.115477  | 21  | 0.415037  |
| um     | S | 7      | -       | - | 436      | Positive | 7   | 282       | 4   | 217       | 3   | 499       |
|        |   |        |         |   |          |          | 0.4 |           | 0.8 |           | 0.4 |           |
| Duoden | C | miR-67 |         |   | 0.826849 |          | 98  | 0.222392  | 75  | 0.026967  | 38  | 0.249359  |
| um     | S | 1      | -       |   | 13       | Positive | 1   | 421       | 9   | 048       | 5   | 469       |
|        |   |        |         |   |          |          |     |           | 0.8 |           | 0.9 |           |
| Duoden | C | miR-41 |         |   | 0.834807 |          | 0.7 | 0.054861  | 47  | -0.076235 | 72  | -0.021373 |
| um     | S | 1c-5p  | -       |   | 92       | Positive | 48  | 935       | 8   | 586       | 9   | 651       |
|        |   |        |         |   |          |          | 0.9 |           | 0.5 |           | 0.4 |           |
| Duoden | C | miR-14 | 0.83794 |   | 0.851740 |          | 56  | 0.006586  | 15  | 0.096266  | 26  | 0.102853  |
| um     | S | 8a     | 5408    |   | 198      | Positive | 9   | 365       | 3   | 95        | 2   | 314       |
|        |   |        |         |   |          |          | 0.4 |           |     |           | 0.4 |           |
| Duoden | C | miR-19 |         |   | 0.876737 |          | 69  | -0.195324 | 0.1 | 0.384143  | 11  | 0.188819  |
| um     | S | 3a-3p  | -       |   | 291      | Positive | 8   | 178       | 04  | 491       | 6   | 313       |
|        |   |        |         |   |          |          | 0.8 |           | 0.1 |           | 0.1 |           |
| Duoden | C | miR-65 |         |   | 0.892277 |          | 01  | 0.054447  | 23  | 0.308122  | 65  | 0.362570  |
| um     | S | 20     | -       |   | 348      | Positive | 1   | 784       | 2   | 295       | 1   | 079       |
|        |   |        |         |   |          |          | 0.2 |           | 0.4 |           | 0.5 |           |
| Duoden | C | miR-29 | 0.81180 |   |          |          | 50  | 0.152549  | 64  | -0.094019 | 62  | 0.058529  |
| um     | S | b      | 5006    | - | -        | Positive | 3   | 465       | 7   | 909       | 3   | 556       |
|        |   |        |         |   |          |          | 0.9 |           |     |           | 0.3 |           |
| Duoden | C | miR-19 | 0.81665 |   |          |          | 35  | 0.069041  | 0.3 | 0.833221  | 14  | 0.902263  |
| um     | S | 0a     | 9325    | - | -        | Positive | 6   | 644       | 09  | 554       | 5   | 198       |
| Duoden | C | miR-1  | 0.81773 | - | -        | Positive | 0.5 | 0.153805  | 0.7 | 0.083523  | 0.2 | 0.237328  |

|        |   |        |         |   |   |          |     |           |     |           |     |           |
|--------|---|--------|---------|---|---|----------|-----|-----------|-----|-----------|-----|-----------|
| um     | S |        | 172     |   |   |          | 77  | 336       | 84  | 356       | 67  | 692       |
|        |   |        |         |   |   |          | 7   |           | 8   |           | 9   |           |
|        |   |        |         |   |   |          | 0.4 |           | 0.6 |           | 0.8 |           |
| Duoden | C | miR-15 | 0.83336 |   |   |          | 97  | 0.113765  | 96  | -0.078838 | 32  | 0.034926  |
| um     | S | 2      | 0605    | - | - | Positive | 4   | 11        | 5   | 518       | 6   | 592       |
|        |   |        |         |   |   |          | 0.6 |           | 0.2 |           | 0.0 |           |
| Duoden | C | miR-14 | 0.83890 |   |   |          | 56  | 0.083000  | 74  | 0.228624  | 80  | 0.311624  |
| um     | S | 5      | 6519    | - | - | Positive | 9   | 234       | 8   | 375       | 2   | 609       |
|        |   |        |         |   |   |          | 0.2 |           | 0.1 |           | 0.6 |           |
| Duoden | C | miR-22 | 0.85520 |   |   |          | 05  | -0.289506 | 06  | 0.459431  | 93  | 0.169925  |
| um     | S | 84p    | 8764    | - | - | Positive | 6   | 617       | 6   | 619       | 6   | 001       |
|        |   |        |         |   |   |          |     |           | 0.2 |           | 0.1 |           |
| Duoden | C | miR-15 | 0.85938 |   |   |          | 0.9 | 0.034194  | 81  | -0.377282 | 29  | -0.343087 |
| um     | S | 3      | 025     | - | - | Positive | 17  | 92        | 3   | 577       | 7   | 657       |
|        |   |        |         |   |   |          |     |           | 0.9 |           | 0.0 |           |
| Duoden | C | miR-37 | 0.86231 |   |   |          | 0.0 | 0.684498  | 14  | -0.050626 | 92  | 0.633872  |
| um     | S | 6e     | 2232    | - | - | Positive | 51  | 174       | 3   | 073       | 2   | 101       |
|        |   |        |         |   |   |          | 0.2 |           | 0.1 |           | 0.5 |           |
| Duoden | C | miR-24 | 0.86674 |   |   |          | 50  | 0.248705  | 62  | -0.334425 | 95  | -0.085720 |
| um     | S | -3p    | 6827    | - | - | Positive | 8   | 763       | 8   | 931       | 6   | 169       |
|        |   |        |         |   |   |          | 0.7 |           | 0.6 |           | 0.4 |           |
| Duoden | C | miR-20 | 0.90399 |   |   |          | 43  | -0.046606 | 13  | -0.075454 | 10  | -0.122060 |
| um     | S | 0b     | 6346    | - | - | Positive | 5   | 768       | 8   | 01        | 5   | 778       |
|        |   |        |         |   |   |          | 0.2 |           | 0.2 |           | 0.8 |           |
| Duoden | C | miR-49 | 0.90578 |   |   |          | 69  | -0.440821 | 73  | 0.476741  | 72  | 0.035919  |
| um     | S | 0      | 0931    | - | - | Positive | 6   | 525       | 4   | 099       | 9   | 574       |
| Duoden | C | miR-14 | 0.91054 |   |   |          | 0.8 | -0.036519 | 0.0 | 0.310216  | 0.0 | 0.273696  |
| um     | S | 3      | 2659    | - | - | Positive | 08  | 735       | 47  | 62        | 70  | 885       |





|        |   |        |   |   |           |          |     |           |     |           |     |           |
|--------|---|--------|---|---|-----------|----------|-----|-----------|-----|-----------|-----|-----------|
| Duoden | C | miR-34 |   |   | -0.841914 |          | 0.5 |           | 0.9 |           | 0.6 |           |
| um     | S | b      | - | - | 253       | Negative | 69  | -0.321928 | 22  | -0.056583 | 12  | -0.378511 |
|        |   |        |   |   |           |          | 4   | 095       | 8   | 528       | 7   | 623       |
| Duoden | C | miR-18 |   |   | -0.837885 |          | 0.0 |           | 0.1 |           |     |           |
| um     | S | 4      | - | - | 162       | Negative | 05  | 0.749593  | 24  | -0.730610 | 0.9 | 0.018983  |
|        |   |        |   |   |           |          | 7   | 202       | 8   | 099       | 57  | 103       |
| Duoden | C | miR-13 |   |   | -0.831343 |          | 0.4 |           |     |           | 0.7 |           |
| um     | S | 2      | - | - | 372       | Negative | 88  | -0.162446 | 0.3 | 0.220114  | 80  | 0.057667  |
|        |   |        |   |   |           |          | 7   | 822       | 59  | 251       | 8   | 429       |
| Duoden | C | miR-20 |   |   | -0.829433 |          | 0.2 |           | 0.0 |           | 0.7 |           |
| um     | S | 0c     | - | - | 597       | Negative | 80  | 0.229560  | 78  | -0.286829 | 84  | -0.057268 |
|        |   |        |   |   |           |          | 2   | 939       | 1   | 281       | 5   | 342       |
| Duoden | C | miR-34 |   |   | -0.827913 |          | 0.5 |           |     |           | 0.9 |           |
| um     | S | 5-5p   | - | - | 803       | Negative | 51  | 0.114770  | 0.4 | -0.131644 | 41  | -0.016873 |
|        |   |        |   |   |           |          | 7   | 187       | 73  | 006       | 6   | 819       |
| Duoden | C | miR-40 |   |   | -0.820838 |          | 0.1 |           |     |           | 0.8 |           |
| um     | S | 9a     | - | - | 419       | Negative | 72  | -0.425305 | 0.3 | 0.384663  | 90  | -0.040641 |
|        |   |        |   |   |           |          | 1   | 835       | 23  | 85        | 1   | 984       |
| Duoden | C | miR-24 |   |   | -0.891608 |          | 0.1 |           | 0.7 |           | 0.1 |           |
| um     | S | 83-5p  | - |   | 363       | Negative | 79  | -0.700439 | 61  | -0.206450 | 39  | -0.906890 |
|        |   |        |   |   |           |          | 1   | 718       | 6   | 877       | 5   | 596       |
| Duoden | C | miR-21 |   |   | -0.887073 |          | 0.2 |           | 0.0 |           | 0.8 |           |
| um     | S | 0      | - |   | 25        | Negative | 35  | -0.224462 | 92  | 0.276124  | 12  | 0.051662  |
|        |   |        |   |   |           |          | 7   | 285       | 9   | 405       | 1   | 12        |
| Duoden | C | miR-22 |   |   | -0.838889 |          | 0.3 |           | 0.5 |           | 0.6 |           |
| um     | S | 1      | - |   | 906       | Negative | 81  | 0.117335  | 39  | -0.053860 | 70  | 0.063474  |
|        |   |        |   |   |           |          | 9   | 281       | 1   | 648       | 8   | 633       |
| Duoden | C | miR-61 |   |   | -0.838217 |          | 0.9 |           | 0.1 | 0.205318  | 0.1 | 0.205318  |
|        |   |        |   |   |           |          | 0.9 | 0         | 0.1 | 0.205318  | 0.1 | 0.205318  |

|        |   |        |         |           |   |          |     |           |     |           |     |           |
|--------|---|--------|---------|-----------|---|----------|-----|-----------|-----|-----------|-----|-----------|
| um     | S | 23     |         | 653       |   |          | 58  | 71        | 908 | 58        | 908 |           |
|        |   |        |         |           |   |          | 2   | 5         |     | 9         |     |           |
|        |   |        |         |           |   |          | 0.1 | 0.2       |     | 0.6       |     |           |
| Duoden | C | miR-65 |         | -0.830738 |   |          | 81  | -0.204254 | 79  | 0.139886  | 51  | -0.064368 |
| um     | S | 29     | -       | 17        | - | Negative | 8   | 994       | 1   | 175       | 5   | 819       |
|        |   |        |         |           |   |          | 0.3 |           |     | 0.5       |     |           |
| Duoden | C | miR-45 |         | -0.827241 |   |          | 84  | 0.118836  | 0.7 | -0.035979 | 27  | 0.082856  |
| um     | S | 4      | -       | 102       | - | Negative | 6   | 23        | 5   | 297       | 7   | 932       |
|        |   |        |         |           |   |          | 0.1 |           |     | 0.4       |     |           |
| Duoden | C | miR-22 | -0.9778 |           |   |          | 82  | 0.130724  | 0.1 | -0.246108 | 72  | -0.115383 |
| um     | S | 85f    | 3975    | -         | - | Negative | 9   | 612       | 89  | 49        | 3   | 878       |
|        |   |        |         |           |   |          | 0.4 |           | 0.0 | 0.0       |     |           |
| Duoden | C | miR-19 | -0.9765 |           |   |          | 77  | 0.091989  | 33  | -0.256006 | 91  | -0.164016 |
| um     | S | 1      | 08932   | -         | - | Negative | 9   | 376       | 6   | 149       | 6   | 773       |
|        |   |        |         |           |   |          | 0.2 |           | 0.0 |           |     |           |
| Duoden | C | miR-22 | -0.9757 |           |   |          | 50  | 0.157322  | 60  | -0.426412 | 0.1 | -0.269089 |
| um     | S | 85k    | 61705   | -         | - | Negative | 2   | 491       | 4   | 289       | 8   | 798       |
|        |   |        |         |           |   |          | 0.0 |           | 0.1 | 0.4       |     |           |
| Duoden | C | miR-36 | -0.9518 |           |   |          | 06  | 0.401862  | 16  | -0.644905 | 80  | -0.243042 |
| um     | S | 3      | 16349   | -         | - | Negative | 2   | 111       | 1   | 041       | 9   | 931       |
|        |   |        |         |           |   |          | 0.6 |           | 0.3 |           |     |           |
| Duoden | C | miR-14 | -0.9426 |           |   |          | 93  | 0.058293  | 13  | -0.255636 | 0.3 | -0.197343 |
| um     | S | 2-3p   | 45581   | -         | - | Negative | 2   | 41        | 3   | 814       | 59  | 404       |
|        |   |        |         |           |   |          |     |           | 0.2 |           |     |           |
| Duoden | C | miR-21 | -0.9420 |           |   |          | 0.6 | 0.106915  | 20  | -0.621488 | 0.3 | -0.514573 |
| um     | S | 9-5p   | 56003   | -         | - | Negative | 84  | 204       | 5   | 377       | 11  | 173       |
| Duoden | C | miR-18 | -0.9358 |           |   |          | 0.2 | -0.248467 | 0.1 | 0.323297  | 0.6 | 0.074829  |
| um     | S | 1b     | 75534   | -         | - | Negative | 19  | 977       | 51  | 662       | 53  | 685       |

|        |   |        |         |   |   |          | 6   |           | 7   |           |     |           |
|--------|---|--------|---------|---|---|----------|-----|-----------|-----|-----------|-----|-----------|
| Duoden | C | miR-37 | -0.9126 |   |   |          | 0.1 | -0.270010 | 95  | 0.176296  | 83  | -0.093714 |
| um     | S | 8b     | 14161   | - | - | Negative | 14  | 442       | 9   | 007       | 3   | 435       |
|        |   |        |         |   |   |          | 0.1 |           | 0.2 |           | 0.7 |           |
| Duoden | C | miR-20 | -0.9111 |   |   |          | 18  | 0.500428  | 90  | -0.642447 | 84  | -0.142019 |
| um     | S | b      | 2175    | - | - | Negative | 5   | 991       | 1   | 995       | 8   | 005       |
|        |   |        |         |   |   |          | 0.0 |           | 0.3 |           | 0.2 |           |
| Duoden | C | miR-15 | -0.9093 |   |   |          | 90  | -0.167530 | 81  | -0.369030 | 32  | -0.536560 |
| um     | S | 5      | 95251   | - | - | Negative | 6   | 486       | 9   | 357       | 3   | 843       |
|        |   |        |         |   |   |          | 0.2 |           | 0.2 |           | 0.8 |           |
| Duoden | C | miR-18 | -0.9090 |   |   |          | 55  | -0.218499 | 27  | 0.266045  | 02  | 0.047546  |
| um     | S | 1a     | 45251   | - | - | Negative | 5   | 491       | 9   | 679       | 2   | 188       |
|        |   |        |         |   |   |          | 0.3 |           | 0.2 |           | 0.6 |           |
| Duoden | C | miR-22 | -0.9010 |   |   |          | 37  | -0.119739 | 97  | 0.212848  | 62  | 0.093109  |
| um     | S | 84w    | 73642   | - | - | Negative | 3   | 244       | 2   | 649       | 2   | 404       |
|        |   |        |         |   |   |          | 0.2 |           | 0.3 |           | 0.9 |           |
| Duoden | C | miR-18 | -0.8899 |   |   |          | 65  | 0.353636  | 49  | -0.353636 | 59  |           |
| um     | S | b      | 41692   | - | - | Negative | 1   | 955       | 7   | 955       | 7   | 0         |
|        |   |        |         |   |   |          | 0.5 |           | 0.0 |           | 0.3 |           |
| Duoden | C |        | -0.8881 |   |   |          | 33  | -0.089049 | 65  | 0.232968  | 46  | 0.143919  |
| um     | S | let-7i | 78447   | - | - | Negative | 1   | 621       | 9   | 936       | 6   | 315       |
|        |   |        |         |   |   |          | 0.5 |           | 0.3 |           | 0.4 |           |
| Duoden | C | miR-12 | -0.8871 |   |   |          | 91  | -0.391830 | 76  | 0.711202  | 04  | 0.319372  |
| um     | S | 46     | 84852   | - | - | Negative | 4   | 108       | 1   | 498       | 1   | 39        |
|        |   |        |         |   |   |          | 0.3 |           | 0.8 |           | 0.3 |           |
| Duoden | C | miR-15 | -0.8654 |   |   |          | 52  | -0.307011 | 15  | -0.114130 | 97  | -0.421141 |
| um     | S | 0      | 59054   | - | - | Negative | 9   | 582       | 9   | 399       | 4   | 981       |

|        |   |        |         |   |          |          |     |           |      |           |     |           |
|--------|---|--------|---------|---|----------|----------|-----|-----------|------|-----------|-----|-----------|
| Duoden | C |        | -0.8579 |   |          |          | 0.2 |           | 0.4  |           | 0.8 |           |
| um     | S | miR-25 | 62749   | - | -        | Negative | 91  | -0.081355 | 57   | 0.065326  | 85  | -0.016028 |
|        |   |        |         |   |          |          | 9   | 299       | 1    | 725       | 3   | 574       |
| Duoden | C | miR-65 | -0.8558 |   |          |          | 0.5 |           | 0.6  |           |     |           |
| um     | S | 22     | 53722   | - | -        | Negative | 89  | 0.112474  | 46   | -0.182864 | 0.8 | -0.070389 |
|        |   |        |         |   |          |          | 2   | 729       | 2    | 057       | 44  | 328       |
| Duoden | C | miR-37 | -0.8517 |   |          |          | 0.2 |           | 0.2  |           | 0.8 |           |
| um     | S | 8      | 81109   | - | -        | Negative | 78  | -0.170412 | 24   | 0.188122  | 51  | 0.017709  |
|        |   |        |         |   |          |          | 2   | 607       | 5    | 561       | 6   | 954       |
| Duoden | C |        | -0.8384 |   |          |          | 0.7 |           | 0.7  | 0.024441  | 23  | -0.009867 |
| um     | S | miR-93 | 39447   | - | -        | Negative | 12  | -0.034309 | 26   | 238       | 6   | 906       |
|        |   |        |         |   |          |          | 0.2 |           | 0.1  |           | 0.3 |           |
| Duoden | C | miR-14 | -0.8197 |   |          |          | 67  | -0.127758 | 48   | 0.179955  | 62  | 0.052197  |
| um     | S | 0      | 26748   | - | -        | Negative | 7   | 066       | 7    | 841       | 6   | 775       |
|        |   |        |         |   |          |          | 0.7 |           | 0.5  |           | 0.8 |           |
| Duoden | C | miR-22 | -0.8176 |   |          |          | 38  | -0.117356 | 79   | 0.192645  | 82  | 0.075288  |
| um     | S | 84v    | 39903   | - | -        | Negative | 8   | 951       | 3    | 078       | 7   | 127       |
|        |   |        |         |   |          |          |     |           | 0.3  |           | 0.4 |           |
| Duoden | C | miR-15 | -0.8103 |   |          |          | 0.1 |           | 0.18 | 0.099895  | 45  | -0.033861 |
| um     | S | 1-3p   | 98263   | - | -        | Negative | 84  | -0.133756 | 1    | 011       | 4   | 767       |
|        |   |        |         |   |          |          | 0.8 |           | 0.3  |           | 0.2 |           |
| Duoden | C | miR-33 | -0.8100 |   |          |          | 53  | -0.030879 | 74   | -0.189530 | 78  | -0.220409 |
| um     | S | 8      | 93078   | - | -        | Negative | 7   | 313       | 7    | 022       | 8   | 335       |
|        |   |        |         |   |          |          | 0.8 |           | 0.7  |           | 0.6 |           |
| Duoden | R | miR-24 |         |   | 0.826636 |          | 87  | -0.125530 | 97   | -0.115477 | 95  | -0.241008 |
| um     | S | 19-3p  | -       | - | 781      | Positive | 6   | 882       | 9    | 217       | 9   | 1         |
| Duoden | R | miR-18 | -       | - | 0.834685 | Positive | 0.6 | 0.118488  | 0.5  | 0.111581  | 0.3 | 0.230069  |

|        |   |        |         |   |          |          |  |     |           |     |           |     |           |
|--------|---|--------|---------|---|----------|----------|--|-----|-----------|-----|-----------|-----|-----------|
| um     | S | 2      |         |   | 271      |          |  | 28  | 251       | 97  | 015       | 13  | 266       |
|        |   |        |         |   |          |          |  | 7   |           | 7   |           | 5   |           |
|        |   |        |         |   |          |          |  |     |           | 0.0 |           | 0.1 |           |
| Duoden | R | miR-12 |         |   | 0.879591 |          |  | 0.6 | -0.099535 | 34  | 0.584962  | 62  | 0.485426  |
| um     | S | 24     | -       | - | 001      | Positive |  | 98  | 674       | 4   | 501       | 6   | 827       |
|        |   |        |         |   |          |          |  | 0.7 |           | 0.6 |           | 0.4 |           |
| Duoden | R | miR-20 |         |   | 0.910465 |          |  | 43  | -0.046606 | 13  | -0.075454 | 10  | -0.122060 |
| um     | S | 0b     | -       | - | 118      | Positive |  | 5   | 768       | 8   | 01        | 5   | 778       |
|        |   |        |         |   |          |          |  | 0.0 |           | 0.2 |           | 0.7 |           |
| Duoden | R | miR-12 | 0.81007 |   |          |          |  | 98  | -0.284257 | 48  | 0.232164  | 54  | -0.052092 |
| um     | S | 5b     | 3861    | - | -        | Positive |  | 6   | 121       | 2   | 885       | 4   | 236       |
|        |   |        |         |   |          |          |  | 0.1 |           | 0.7 |           | 0.1 |           |
| Duoden | R | miR-24 | 0.81346 |   |          |          |  | 79  | -0.700439 | 61  | -0.206450 | 39  | -0.906890 |
| um     | S | 83-5p  | 4153    | - | -        | Positive |  | 1   | 718       | 6   | 877       | 5   | 596       |
|        |   |        |         |   |          |          |  | 0.0 |           | 0.1 |           | 0.6 |           |
| Duoden | R | miR-99 | 0.81884 |   |          |          |  | 89  | -0.462081 | 53  | 0.397493  | 70  | -0.064588 |
| um     | S | b      | 5542    | - | -        | Positive |  | 7   | 738       | 1   | 363       | 4   | 375       |
|        |   |        |         |   |          |          |  | 0.6 |           | 0.6 |           | 0.9 |           |
| Duoden | R | miR-18 | 0.82104 |   |          |          |  | 80  | -0.036530 | 36  | 0.042357  | 38  | 0.005827  |
| um     | S | 6      | 8788    | - | -        | Positive |  | 8   | 37        | 7   | 565       | 7   | 195       |
|        |   |        |         |   |          |          |  | 0.4 |           | 0.0 |           | 0.0 |           |
| Duoden | R | miR-19 | 0.83542 |   |          |          |  | 77  | 0.091989  | 33  | -0.256006 | 91  | -0.164016 |
| um     | S | 1      | 0917    | - | -        | Positive |  | 9   | 376       | 6   | 149       | 6   | 773       |
|        |   |        |         |   |          |          |  | 0.3 |           | 0.2 |           | 0.7 |           |
| Duoden | R | miR-14 | 0.85053 |   |          |          |  | 02  | 0.109850  | 69  | -0.153219 | 01  | -0.043368 |
| um     | S | 8b     | 7531    | - | -        | Positive |  | 9   | 579       | 4   | 311       | 6   | 732       |
| Duoden | R | miR-10 | 0.86335 |   |          |          |  | 0.2 | -0.395545 | 0.1 | 0.521094  | 0.4 | 0.125549  |
| um     | S | 0      | 2228    | - | -        | Positive |  | 30  | 483       | 48  | 892       | 85  | 409       |

|        |   |        |         |   |   |              |     |           |     |           |     |           |
|--------|---|--------|---------|---|---|--------------|-----|-----------|-----|-----------|-----|-----------|
|        |   |        |         |   |   |              | 9   |           | 5   |           | 1   |           |
|        |   |        |         |   |   |              |     |           | 0.3 |           | 0.4 |           |
| Duoden | R | miR-15 | 0.86705 |   |   |              | 0.1 | -0.133756 | 18  | 0.099895  | 45  | -0.033861 |
| um     | S | 1-3p   | 0253    | - | - | Positive     | 84  | 778       | 1   | 011       | 4   | 767       |
|        |   |        |         |   |   |              | 0.8 |           | 0.3 |           | 0.3 |           |
| Duoden | R | miR-12 | 0.87042 |   |   |              | 62  | -0.019365 | 32  | 0.228818  | 44  | 0.209453  |
| um     | S | 9      | 1816    | - | - | Positive     | 2   | 325       | 7   | 69        | 9   | 366       |
|        |   |        |         |   |   |              | 0.8 |           | 0.3 |           | 0.3 |           |
| Duoden | R | miR-12 | 0.87042 |   |   |              | 62  | -0.019365 | 32  | 0.228818  | 44  | 0.209453  |
| um     | S | 9-5p   | 1816    | - | - | Positive     | 2   | 325       | 7   | 69        | 9   | 366       |
|        |   |        |         |   |   |              | 0.1 |           | 0.7 |           |     |           |
| Duoden | R | miR-19 | 0.89212 |   |   |              | 98  | -0.280107 | 00  | 0.087462  | 0.3 | -0.192645 |
| um     | S | 0b     | 3522    | - | - | Positive     | 7   | 919       | 6   | 841       | 64  | 078       |
|        |   |        |         |   |   |              | 0.9 |           | 0.7 |           | 0.6 |           |
| Duoden | R | miR-12 | 0.89511 |   |   |              | 82  | -0.003059 | 19  | -0.091771 | 26  | -0.094831 |
| um     | S | 71     | 5563    | - | - | Positive     | 1   | 8         | 6   | 54        | 8   | 34        |
|        |   |        |         |   |   |              | 0.2 |           | 0.0 |           | 0.4 |           |
| Duoden | R | miR-14 |         |   |   | -0.933694    | 71  | -0.210268 | 95  | 0.328041  | 53  | 0.117772  |
| um     | S | 68     | -       | - |   | 88 Negative  | 4   | 543       | 7   | 219       | 1   | 675       |
|        |   |        |         |   |   |              | 0.3 |           | 0.5 |           | 0.9 |           |
| Duoden | R | miR-22 |         |   |   | -0.915681    | 31  | 0.415037  | 01  | -0.415037 | 14  |           |
| um     | S | 85r    | -       | - |   | 141 Negative | 5   | 499       | 3   | 499       | 4   | 0         |
|        |   |        |         |   |   |              | 0.2 |           | 0.4 |           | 0.8 |           |
| Duoden | R | miR-27 |         |   |   | -0.914900    | 72  | -0.136131 | 07  | 0.114846  | 37  | -0.021285 |
| um     | S | a-3p   | -       | - |   | 373 Negative | 8   | 483       | 4   | 232       | 8   | 251       |
|        |   |        |         |   |   |              | 0.5 |           | 0.6 |           |     |           |
| Duoden | R | miR-65 |         |   |   | -0.911281    | 89  | 0.112474  | 46  | -0.182864 | 0.8 | -0.070389 |
| um     | S | 22     | -       | - |   | 805 Negative | 2   | 729       | 2   | 057       | 44  | 328       |



|         |   |        |         |   |          |          |     |           |     |           |     |           |
|---------|---|--------|---------|---|----------|----------|-----|-----------|-----|-----------|-----|-----------|
| um      | S | 6e     |         |   | 641      |          | 51  | 174       | 14  | 073       | 92  | 101       |
|         |   |        |         |   |          |          |     |           | 3   |           | 2   |           |
|         |   |        |         |   |          |          | 0.4 |           | 0.4 |           | 0.9 |           |
| Duoden  | R | miR-22 | -0.8401 |   |          |          | 96  | 0.160464  | 25  | -0.234465 | 69  | -0.074000 |
| um      | S | 85m    | 05085   | - | -        | Negative | 2   | 672       | 7   | 254       | 2   | 581       |
|         |   |        |         |   |          |          | 0.0 |           | 0.0 |           | 0.0 |           |
|         | A | miR-30 |         |   | 0.814940 |          | 98  | 0.176934  | 00  | 0.559521  | 00  | 0.736456  |
| Jejunum | L | a-5p   | -       | - | 042      | Positive | 6   | 713       | 2   | 583       | 3   | 296       |
|         |   |        |         |   |          |          | 0.2 |           | 0.4 |           | 0.8 |           |
|         | A | miR-10 |         |   | 0.819364 |          | 57  | 0.554321  | 05  | -0.434429 | 00  | 0.119892  |
| Jejunum | L | b      | -       | - | 879      | Positive | 9   | 342       | 9   | 127       | 4   | 216       |
|         |   |        |         |   |          |          |     |           | 0.2 |           | 0.4 |           |
|         | A | miR-24 |         |   | 0.825758 |          | 0.3 | 0.192645  | 37  | -0.362570 | 72  | -0.169925 |
| Jejunum | L | 43     | -       | - | 95       | Positive | 85  | 078       | 2   | 079       | 1   | 001       |
|         |   |        |         |   |          |          | 0.4 |           | 0.2 |           |     |           |
|         | A |        |         |   | 0.826365 |          | 19  | 0.164119  | 93  | 0.127111  | 0.1 | 0.291231  |
| Jejunum | L | miR-24 | -       | - | 661      | Positive | 5   | 38        | 8   | 918       | 37  | 298       |
|         |   |        |         |   |          |          | 0.0 |           | 0.0 |           | 0.0 |           |
|         | A | miR-34 |         |   | 0.834116 |          | 36  | 0.285908  | 11  | 0.267077  | 02  | 0.552986  |
| Jejunum | L | 2      | -       | - | 902      | Positive | 6   | 872       | 4   | 202       | 6   | 074       |
|         |   |        |         |   |          |          | 0.3 |           | 0.1 |           | 0.0 |           |
|         | A | miR-24 |         |   | 0.851095 |          | 38  | -0.412472 | 00  | -0.544173 | 18  | -0.956646 |
| Jejunum | L | 19-5p  | -       | - | 501      | Positive | 1   | 707       | 3   | 819       | 2   | 526       |
|         |   |        |         |   |          |          | 0.1 |           | 0.3 |           | 0.7 |           |
|         | A | miR-15 |         |   | 0.855593 |          | 69  | -0.143888 | 16  | 0.103988  | 14  | -0.039900 |
| Jejunum | L | b      | -       | - | 41       | Positive | 1   | 927       | 7   | 844       | 8   | 083       |
|         |   |        |         |   |          |          | 0.1 | 0.257792  | 0.1 | 0.425829  | 0.0 | 0.683622  |
| Jejunum | L | 7      | -       | - | 091      | Positive | 81  | 931       | 48  | 284       | 27  | 215       |



|         |   |        |         |   |          |          |          |           |          |           |          |           |
|---------|---|--------|---------|---|----------|----------|----------|-----------|----------|-----------|----------|-----------|
|         |   |        |         |   |          | 6        |          | 3         |          |           |          |           |
|         |   |        |         |   |          | 0.0      |          | 0.9       |          | 0.0       |          |           |
|         | A | miR-21 |         |   | 0.875307 | 36       | 0.359867 | 97        | 0.001105 | 69        | 0.360972 |           |
| Jejunum | L | 4      | -       | - | 874      | Positive | 4        | 252       | 1        | 09        | 5        | 342       |
|         |   |        |         |   |          |          | 0.4      |           | 0.1      |           | 0.0      |           |
|         | A | miR-24 |         |   | 0.897181 |          | 94       | -0.736965 | 29       | -0.847996 | 12       | -1.584962 |
| Jejunum | L | 19-3p  | -       | - | 156      | Positive | 3        | 594       | 4        | 907       | 5        | 501       |
|         |   |        |         |   |          |          | 0.0      |           |          |           | 0.2      |           |
|         | A | miR-13 |         |   | 0.903161 |          | 12       | 0.286761  | 0.0      | -0.475137 | 54       | -0.188375 |
| Jejunum | L | 2      | -       | - | 54       | Positive | 2        | 781       | 21       | 264       | 1        | 483       |
|         |   |        |         |   |          |          | 0.4      |           | 0.7      |           | 0.7      |           |
|         | A | miR-43 |         |   | 0.919000 |          | 78       | 0.225559  | 14       | -0.127379 | 84       | 0.098180  |
| Jejunum | L | 2      | -       | - | 253      | Positive | 9        | 7         | 5        | 306       | 3        | 394       |
|         |   |        |         |   |          |          | 0.1      |           | 0.0      |           | 0.6      |           |
|         | A | miR-19 |         |   | 0.922881 |          | 57       | 0.265382  | 19       | -0.337817 | 89       | -0.072435 |
| Jejunum | L | 3b     | -       | - | 436      | Positive | 1        | 161       | 3        | 997       | 2        | 836       |
|         |   |        |         |   |          |          | 0.5      |           | 0.0      |           | 0.0      |           |
|         | A | miR-19 |         |   | 0.939297 |          | 32       | 0.127157  | 03       | 0.495880  | 19       | 0.623038  |
| Jejunum | L | 5      | -       | - | 438      | Positive | 6        | 494       | 5        | 801       | 7        | 295       |
|         |   |        |         |   |          |          | 0.7      |           | 0.4      |           | 0.4      |           |
|         | A | miR-15 |         |   | 0.992885 |          | 27       | -0.180572 | 16       | 0.280107  | 73       | 0.099535  |
| Jejunum | L | 4b     | -       | - | 856      | Positive | 8        | 246       | 2        | 919       | 7        | 674       |
|         |   |        |         |   |          |          | 0.4      |           | 0.4      |           | 0.9      |           |
|         | A | miR-13 | 0.86240 |   |          |          | 64       | -0.126276 | 98       | 0.142019  | 22       | 0.015742  |
| Jejunum | L | 8      | 5491    | - | -        | Positive | 4        | 268       | 5        | 005       | 3        | 737       |
|         |   |        |         |   |          |          |          |           | 0.0      |           | 0.1      |           |
|         | A | miR-22 | 0.87524 |   |          |          | 0.8      | -0.137503 | 48       | 1.652076  | 30       | 1.514573  |
| Jejunum | L | 85i    | 1435    | - | -        | Positive | 09       | 524       | 3        | 697       | 8        | 173       |

|         |   |        |         |          |           |          |     |           |     |           |     |           |
|---------|---|--------|---------|----------|-----------|----------|-----|-----------|-----|-----------|-----|-----------|
|         |   |        |         |          |           |          | 0.7 |           |     |           | 0.0 |           |
|         | A | miR-24 | 0.90378 |          |           |          | 73  | 0.094636  | 0.0 | -0.878908 | 60  | -0.784271 |
| Jejunum | L | 87     | 0286    | -        | -         | Positive | 4   | 874       | 37  | 183       | 1   | 309       |
|         |   |        |         |          |           |          |     |           | 0.0 |           | 0.1 |           |
|         | A | miR-28 | 0.96443 |          |           |          | 0.9 | 0.038135  | 76  | -0.954196 | 01  | -0.916061 |
| Jejunum | L | 87     | 156     | -        | -         | Positive | 3   | 129       | 5   | 31        | 9   | 182       |
|         |   |        |         |          |           |          | 0.9 |           | 0.1 |           | 0.1 |           |
|         | A | miR-29 | 0.93644 |          |           |          | 06  | -0.044854 | 04  | -0.760329 | 08  | -0.805183 |
| Jejunum | L | 04     | 5689    | -        | -         | Positive | 5   | 236       | 3   | 587       | 5   | 823       |
|         |   |        |         |          |           |          | 0.0 |           | 0.2 |           | 0.6 |           |
|         | A | miR-48 |         | 0.895804 |           |          | 00  | 0.933389  | 17  | -0.724708 | 35  | 0.208681  |
| Jejunum | L | 6      | -       | 433      | -         | Positive | 7   | 437       | 9   | 128       | 6   | 309       |
|         |   |        |         |          |           |          |     |           | 0.5 |           | 0.1 |           |
|         | A | miR-12 |         |          | -0.985296 |          | 0.5 | 0.160464  | 63  | 0.180572  | 24  | 0.341036  |
| Jejunum | L | 77     | -       | -        | 668       | Negative | 01  | 672       | 6   | 246       | 5   | 918       |
|         |   |        |         |          |           |          | 0.0 |           | 0.5 |           | 0.0 |           |
|         | A | miR-42 |         |          | -0.956302 |          | 92  | -0.600392 | 99  | -0.173331 | 50  | -0.773724 |
| Jejunum | L | 4-3p   | -       | -        | 528       | Negative | 6   | 541       | 7   | 603       | 5   | 144       |
|         |   |        |         |          |           |          | 0.0 |           | 0.1 |           | 0.4 |           |
|         | A |        |         |          | -0.909086 |          | 24  | -0.437645 | 05  | 0.826495  | 95  | 0.388849  |
| Jejunum | L | miR-31 | -       | -        | 226       | Negative | 2   | 914       | 4   | 602       | 7   | 687       |
|         |   |        |         |          |           |          | 0.5 |           | 0.0 |           | 0.0 |           |
|         | A | miR-37 |         |          | -0.908469 |          | 21  | -0.115605 | 57  | -0.397559 | 25  | -0.513165 |
| Jejunum | L | 5      | -       | -        | 651       | Negative | 7   | 976       | 7   | 606       | 7   | 582       |
|         |   |        |         |          |           |          | 0.5 |           | 0.7 |           | 0.5 |           |
|         | A | miR-23 |         |          | -0.902493 |          | 42  | -0.111031 | 32  | -0.103093 | 02  | -0.214124 |
| Jejunum | L | 76     | -       | -        | 009       | Negative | 6   | 312       | 4   | 493       | 1   | 805       |
| Jejunum | A | miR-22 | -       | -        | -0.883949 | Negative | 0.0 | -0.472068 | <.0 | 1.519374  | 0.0 | 1.047305  |

|         |   |        |   |   |           |          |     |           |     |           |     |           |
|---------|---|--------|---|---|-----------|----------|-----|-----------|-----|-----------|-----|-----------|
|         | L | 85p    |   |   | 042       |          | 88  | 444       | 00  | 159       | 1   | 715       |
|         |   |        |   |   |           |          | 4   |           | 1   |           |     |           |
|         |   |        |   |   |           |          | 0.2 |           | 0.8 |           | 0.2 |           |
|         | A | miR-37 |   |   | -0.878195 |          | 14  | -0.295775 | 97  | -0.034765 | 27  | -0.330541 |
| Jejunum | L | 8b     | - | - | 796       | Negative | 6   | 807       | 6   | 418       | 8   | 225       |
|         |   |        |   |   |           |          | 0.6 |           | 0.3 |           | 0.5 |           |
|         | A | miR-67 |   |   | -0.855945 |          | 62  | 0.080919  | 43  | -0.206450 | 30  | -0.125530 |
| Jejunum | L | 1      | - | - | 545       | Negative | 6   | 995       | 8   | 877       | 5   | 882       |
|         |   |        |   |   |           |          | 0.5 |           | 0.6 |           | 0.9 |           |
|         | A | miR-20 |   |   | -0.853711 |          | 25  | -0.092362 | 04  | 0.104255  | 58  | 0.011893  |
| Jejunum | L | 0a     | - | - | 268       | Negative | 9   | 393       | 5   | 551       | 6   | 158       |
|         |   |        |   |   |           |          | 0.7 |           | <.0 |           | 0.0 |           |
|         | A | miR-42 |   |   | -0.847273 |          | 63  | -0.037535 | 00  | 1.153805  | 00  | 1.116269  |
| Jejunum | L | 5-3p   | - | - | 115       | Negative | 3   | 647       | 1   | 336       | 1   | 689       |
|         |   |        |   |   |           |          | 0.8 |           | 0.9 |           | 0.9 |           |
|         | A | miR-34 |   |   | -0.846621 |          | 16  | -0.128007 | 87  | 0.013674  | 10  | -0.114332 |
| Jejunum | L | c      | - | - | 514       | Negative | 8   | 612       | 8   | 937       | 9   | 675       |
|         |   |        |   |   |           |          | 0.3 |           | 0.3 |           | 0.8 |           |
|         | A | miR-37 |   |   | -0.839514 |          | 17  | -0.183248 | 25  | 0.137088  | 22  | -0.046160 |
| Jejunum | L | 8      | - | - | 175       | Negative | 3   | 997       | 2   | 035       | 7   | 961       |
|         |   |        |   |   |           |          | 0.3 |           | 0.2 |           | 0.1 |           |
|         | A | miR-19 |   |   | -0.826128 |          | 23  | -0.148989 | 82  | -0.291937 | 40  | -0.440926 |
| Jejunum | L | 4      | - | - | 247       | Negative | 5   | 428       | 7   | 278       | 4   | 706       |
|         |   |        |   |   |           |          | 0.3 |           | 0.9 |           | 0.5 |           |
|         | A | miR-37 |   |   | -0.823218 |          | 53  | -0.133330 | 13  | 0.018021  | 84  | -0.115309 |
| Jejunum | L | 8c     | - | - | 078       | Negative | 1   | 723       | 3   | 408       | 2   | 316       |
|         |   |        |   |   |           |          | 0.3 | 0.222392  | 0.3 | 0.263034  | 0.0 | 0.485426  |
| Jejunum | L | 0      | - | - | 668       | Negative | 55  | 421       | 52  | 406       | 28  | 827       |

|         |   |        |         |           |     |     |           |     |           |     |           |
|---------|---|--------|---------|-----------|-----|-----|-----------|-----|-----------|-----|-----------|
|         |   |        |         |           |     | 6   |           | 1   |           |     |           |
|         |   |        |         |           |     | 0.0 |           | 0.0 | 0.0       |     |           |
|         | A | miR-19 |         | -0.858573 |     | 23  | 0.359842  | 00  | -0.731232 | 11  | -0.371389 |
| Jejunum | L | 7      | -       | 428       | -   | 5   | 867       | 7   | 481       | 4   | 614       |
|         |   |        |         |           |     | 0.1 |           | 0.0 |           | 0.0 |           |
|         | A | miR-22 |         | -0.904671 |     | 69  | 0.144787  | 00  | 0.738357  | 00  | 0.883144  |
| Jejunum | L | 85k    | -       | 491       | -   | 8   | 25        | 4   | 15        | 1   | 4         |
|         |   |        |         |           |     | 0.2 |           |     |           | 0.8 |           |
|         | A | miR-30 | -0.8936 | -0.856331 |     | 24  | 0.387023  | 0.1 | -0.387023 | 33  |           |
| Jejunum | L | b-3p   | 12299   | 404       | -   | 7   | 123       | 72  | 123       | 5   | 0         |
|         |   |        |         |           |     | 0.7 |           | 0.2 |           | 0.0 |           |
|         | A | miR-50 |         | -0.876935 |     | 75  | 0.044807  | 33  | 0.184217  | 97  | 0.229025  |
| Jejunum | L | 5      | -       | 459       | -   | 5   | 795       | 5   | 718       | 6   | 514       |
|         |   |        |         |           |     | 0.0 |           | 0.0 |           | 0.0 |           |
|         | A | miR-65 | -0.8563 | -0.907492 |     | 07  | 0.504783  | 00  | -0.790887 | 68  | -0.286103 |
| Jejunum | L | 2      | 54004   | 091       | -   | 6   | 13        | 2   | 02        | 9   | 89        |
|         |   |        |         |           |     |     |           | 0.2 |           | 0.4 |           |
|         | C | miR-24 |         | 0.890545  |     | 0.3 | 0.192645  | 37  | -0.362570 | 72  | -0.169925 |
| Jejunum | S | 43     | -       | -         | 174 | 85  | 078       | 2   | 079       | 1   | 001       |
|         |   |        |         |           |     | 0.7 |           | 0.1 |           | 0.2 |           |
|         | C | miR-10 |         | 0.921121  |     | 75  | -0.070389 | 16  | 0.422691  | 77  | 0.352301  |
| Jejunum | S | 6a     | -       | 033       | -   | 2   | 328       | 1   | 072       | 3   | 744       |
|         |   |        |         |           |     | 0.3 |           | 0.0 |           | 0.4 |           |
|         | C | miR-12 |         | 0.970826  |     | 81  | 0.216317  | 96  | -0.338801 | 93  | -0.122484 |
| Jejunum | S | 96     | -       | 485       | -   | 9   | 907       | 4   | 913       | 7   | 007       |
|         |   |        |         |           |     |     |           | 0.1 |           | 0.5 |           |
|         | C | miR-15 |         | 0.826561  |     | 0.1 | 0.365837  | 79  | -0.235783 | 38  | 0.130053  |
| Jejunum | S | 0      | -       | 263       | -   | 15  | 59        | 5   | 64        | 3   | 949       |

|         |   |        |          |     |   |     |           |     |           |     |           |
|---------|---|--------|----------|-----|---|-----|-----------|-----|-----------|-----|-----------|
|         |   |        |          |     |   | 0.1 |           | 0.3 |           | 0.7 |           |
|         | C | miR-15 | 0.82463  |     |   | 69  | -0.143888 | 16  | 0.103988  | 14  | -0.039900 |
| Jejunum | S | b      | 9812     | -   | - | 1   | 927       | 7   | 844       | 8   | 083       |
|         |   |        |          |     |   | 0.5 |           | 0.0 |           | 0.0 |           |
|         | C | miR-18 | 0.905534 |     |   | 17  | 0.101743  | 29  | 0.231780  | 49  | 0.333523  |
| Jejunum | S | 1c     | -        | 789 | - | 4   | 865       | 4   | 059       | 6   | 924       |
|         |   |        |          |     |   | 0.6 |           | 0.0 |           | 0.0 |           |
|         | C | miR-22 | 0.85256  |     |   | 56  | -0.115477 | 09  | 0.893084  | 28  | 0.777607  |
| Jejunum | S | 85r    | 1063     | -   | - | 5   | 217       | 3   | 796       | 1   | 579       |
|         |   |        |          |     |   | 0.9 |           | 0.1 |           | 0.1 |           |
|         | C | miR-29 | 0.846121 |     |   | 06  | -0.044854 | 04  | -0.760329 | 08  | -0.805183 |
| Jejunum | S | 04     | -        | 273 | - | 5   | 236       | 3   | 587       | 5   | 823       |
|         |   |        |          |     |   | 0.4 |           | 0.0 |           | 0.0 |           |
|         | C | miR-30 | 0.87579  |     |   | 51  | -0.072750 | 32  | 0.246327  | 82  | 0.173576  |
| Jejunum | S | c      | 5253     | -   | - | 6   | 249       | 7   | 027       | 1   | 778       |
|         |   |        |          |     |   | 0.1 |           | 0.0 |           | 0.0 |           |
|         | C | miR-32 | 0.837714 |     |   | 96  | 0.148977  | 08  | -0.491448 | 30  | -0.342470 |
| Jejunum | S | 0a     | -        | 44  | - | 7   | 355       | 1   | 308       | 1   | 954       |
|         |   |        |          |     |   | 0.2 |           | 0.0 |           | 0.7 |           |
|         | C | miR-32 | 0.826837 |     |   | 36  | 0.530514  | 73  | -0.637429 | 99  | -0.106915 |
| Jejunum | S | 3      | -        | 534 | - | 9   | 717       | 5   | 921       | 4   | 204       |
|         |   |        |          |     |   | 0.5 |           | 0.7 |           | 0.7 |           |
|         | C | miR-33 | 0.89265  |     |   | 47  | 0.074478  | 10  | -0.040719 | 68  | 0.033759  |
| Jejunum | S | 9a     | 2517     | -   | - | 1   | 216       | 1   | 033       | 6   | 183       |
|         |   |        |          |     |   | 0.0 |           | 0.7 |           |     |           |
|         | C | miR-36 | 0.980851 |     |   | 87  | 0.181547  | 41  | 0.050626  | 0.0 | 0.232173  |
| Jejunum | S | 3      | -        | 135 | - | 3   | 369       | 5   | 073       | 61  | 442       |
| Jejunum | C | miR-42 | 0.88639  | -   | - | 0.7 | -0.037535 | <.0 | 1.153805  | 0.0 | 1.116269  |

|         |   |        |           |     |     |          |     |           |     |           |     |           |
|---------|---|--------|-----------|-----|-----|----------|-----|-----------|-----|-----------|-----|-----------|
|         | S | 5-3p   | 7199      |     |     |          | 63  | 647       | 00  | 336       | 00  | 689       |
|         |   |        |           |     |     |          | 3   |           | 1   |           | 1   |           |
|         |   |        |           |     |     |          | 0.2 |           | 0.5 |           | 0.1 |           |
|         | C | miR-44 | 0.837440  |     |     |          | 69  | 0.332575  | 46  | 0.169925  | 16  | 0.502500  |
| Jejunum | S | 9a     | -         | 284 | -   | Positive | 2   | 339       | 8   | 001       | 8   | 341       |
|         |   |        |           |     |     |          | 0.8 |           | 0.3 |           | 0.1 |           |
|         | C | miR-48 | 0.816158  |     |     |          | 41  | -0.028453 | 02  | -0.192164 | 49  | -0.220618 |
| Jejunum | S | 4      | -         | 627 | -   | Positive | 1   | 895       | 2   | 74        | 7   | 635       |
|         |   |        |           |     |     |          | 0.2 |           | 0.9 |           | 0.2 |           |
|         | C | miR-49 | -0.888372 |     |     |          | 49  | 0.241008  | 65  |           | 46  | 0.241008  |
| Jejunum | S | 1      | -         | -   | 456 | Negative | 9   | 1         | 6   | 0         | 3   | 1         |
|         |   |        |           |     |     |          |     |           | 0.4 |           | 0.0 |           |
|         | C | miR-24 | -0.872078 |     |     |          | 0.0 | 0.710493  | 48  | 0.459431  | 03  | 1.169925  |
| Jejunum | S | 83-5p  | -         | -   | 471 | Negative | 76  | 383       | 8   | 619       | 6   | 001       |
|         |   |        |           |     |     |          | 0.2 |           |     |           | 0.3 |           |
|         | C | miR-28 | -0.852981 |     |     |          | 74  | 1.137503  | 0.0 | -1.863938 | 22  | -0.726434 |
| Jejunum | S | 85     | -         | -   | 029 | Negative | 7   | 524       | 41  | 45        | 5   | 927       |
|         |   |        |           |     |     |          | 0.6 |           | 0.0 |           | 0.0 |           |
|         | C | miR-22 | -0.843506 |     |     |          | 69  | -0.094859 | 07  | 0.571906  | 86  | 0.477047  |
| Jejunum | S | 85b    | -         | 826 | -   | Negative | 3   | 186       | 3   | 348       | 3   | 162       |
|         |   |        |           |     |     |          | 0.7 |           | 0.0 |           |     |           |
|         | C | miR-22 | -0.839737 |     |     |          | 99  | -0.051530 | 03  | 0.529109  | 0.0 | 0.477578  |
| Jejunum | S | 85u    | -         | 001 | -   | Negative | 3   | 301       | 7   | 266       | 77  | 965       |
|         |   |        |           |     |     |          | 0.2 |           |     |           | 0.8 |           |
|         | C | miR-30 | -0.8735   |     |     |          | 24  | 0.387023  | 0.1 | -0.387023 | 33  |           |
| Jejunum | S | b-3p   | 69472     | -   | -   | Negative | 7   | 123       | 72  | 123       | 5   | 0         |
|         | C | miR-65 | -0.8843   |     |     |          | 0.6 | 0.142019  | 0.1 | -0.389946 | 0.3 | -0.247927 |
| Jejunum | S | 23     | 03747     | -   | -   | Negative | 11  | 005       | 51  | 518       | 75  | 513       |

|         |   |        |         |   |          |          |          |           |          |           |          |           |
|---------|---|--------|---------|---|----------|----------|----------|-----------|----------|-----------|----------|-----------|
|         |   |        |         |   |          | 7        |          | 5         |          | 1         |          |           |
|         |   |        |         |   |          |          |          | 0.6       |          | 0.0       |          |           |
|         | R | miR-34 |         |   | 0.819140 | 0.0      | 0.325240 | 36        | 0.050626 | 66        | 0.375866 |           |
| Jejunum | S | 5-5p   | -       | - | 477      | Positive | 83       | 829       | 8        | 073       | 6        | 902       |
|         |   |        |         |   |          |          | 0.0      |           |          | 0.7       |          |           |
|         | R | miR-36 |         |   | 0.834989 |          | 87       | 0.181547  | 41       | 0.050626  | 0.0      | 0.232173  |
| Jejunum | S | 3      | -       | - | 905      | Positive | 3        | 369       | 5        | 073       | 61       | 442       |
|         |   |        |         |   |          |          | 0.8      |           |          | 0.9       |          | 0.8       |
|         | R | miR-36 |         |   | 0.845141 |          | 64       | -0.028569 | 46       | -0.028014 | 57       | -0.056583 |
| Jejunum | S | 9-5p   | -       | - | 528      | Positive | 4        | 152       | 3        | 376       | 2        | 528       |
|         |   |        |         |   |          |          | 0.4      |           |          | 0.0       |          | 0.2       |
|         | R | miR-30 |         |   | 0.856198 |          | 08       | -0.113739 | 07       | 0.308177  | 24       | 0.194438  |
| Jejunum | S | 1a     | -       | - | 834      | Positive | 9        | 147       | 3        | 507       | 8        | 36        |
|         |   |        |         |   |          |          | 0.0      |           |          | 0.0       |          | 0.7       |
|         | R | miR-22 |         |   | 0.861179 |          | 10       | -0.486538 | 08       | 0.413186  | 22       | -0.073351 |
| Jejunum | S | 84z    | -       | - | 872      | Positive | 2        | 445       | 5        | 704       | 7        | 742       |
|         |   |        |         |   |          |          |          |           |          |           |          | 0.2       |
|         | R | miR-23 |         |   | 0.887445 |          | 0.2      | -0.216999 | 0.0      | 0.491925  | 06       | 0.274926  |
| Jejunum | S | 36     | -       | - | 029      | Positive | 19       | 163       | 02       | 464       | 2        | 302       |
|         |   |        |         |   |          |          | 0.4      |           |          | 0.9       |          | 0.3       |
|         | R | miR-18 |         |   | 0.891087 |          | 15       | -0.212512 | 88       | -0.002829 | 30       | -0.215342 |
| Jejunum | S | 2      | -       | - | 273      | Positive | 9        | 9         | 9        | 631       | 2        | 531       |
|         |   |        |         |   |          |          | 0.3      |           |          | 0.9       |          | 0.5       |
|         | R | miR-37 |         |   | 0.931257 |          | 53       | -0.133330 | 13       | 0.018021  | 84       | -0.115309 |
| Jejunum | S | 8c     | -       | - | 192      | Positive | 1        | 723       | 3        | 408       | 2        | 316       |
|         |   |        |         |   |          |          | 0.4      |           |          | 0.0       |          | 0.1       |
|         | R |        | 0.83269 |   |          |          | 10       | 0.190908  | 38       | -0.467215 | 56       | -0.276307 |
| Jejunum | S | let-7e | 1208    | - | -        | Positive | 2        | 001       | 8        | 552       | 1        | 551       |

|         |   |        |         |          |   |     |           |     |           |     |           |
|---------|---|--------|---------|----------|---|-----|-----------|-----|-----------|-----|-----------|
|         |   |        |         |          |   | 0.1 |           | <.0 |           | 0.0 |           |
|         | R | miR-10 | 0.82860 |          |   | 28  | 0.415971  | 00  | 1.322715  | 00  | 1.738686  |
| Jejunum | S | 0      | 1842    | -        | - | 1   | 585       | 1   | 163       | 6   | 747       |
|         |   |        |         |          |   | 0.1 |           | 0.0 |           | 0.0 |           |
|         | R | miR-12 | 0.89686 | 0.858389 |   | 23  | 0.247779  | 04  |           | 03  | 0.671581  |
| Jejunum | S | 5b     | 5876    | 021      | - | 5   | 684       | 1   | 0.423802  | 9   | 684       |
|         |   |        |         |          |   | 0.4 |           | 0.0 |           | 0.0 |           |
|         | R | miR-13 | 0.82782 |          |   | 64  | 0.177084  | 00  | -0.918329 | 03  | -0.741244 |
| Jejunum | S | 07     | 4761    | -        | - | 8   | 793       | 7   | 268       | 6   | 475       |
|         |   |        |         |          |   | 0.4 |           | 0.0 |           |     |           |
|         | R | miR-17 |         | 0.932595 |   | 34  | -0.124071 | 19  | -0.374303 | 0.0 | -0.498374 |
| Jejunum | S | -3p    | -       | 895      | - | 6   | 108       | 9   | 708       | 11  | 816       |
|         |   |        |         |          |   | 0.9 |           | 0.0 |           | 0.1 |           |
|         | R | miR-18 |         | 0.919277 |   | 93  | 0.002343  | 39  | 0.333705  | 70  | 0.336049  |
| Jejunum | S | a      | -       | 012      | - | 2   | 94        | 7   | 263       | 1   | 203       |
|         |   |        |         |          |   | 0.5 |           | 0.9 |           | 0.5 |           |
|         | R | miR-19 | 0.92578 | 0.927416 |   | 42  | 0.099258  | 84  | 0.002077  | 67  | 0.101336  |
| Jejunum | S | 9c     | 8242    | 854      | - | 1   | 871       | 2   | 315       | 7   | 186       |
|         |   |        |         |          |   | 0.0 |           | 0.0 |           | 0.6 |           |
|         | R | miR-19 |         | 0.889886 |   | 95  | -0.256405 | 12  | 0.333044  | 52  | 0.076638  |
| Jejunum | S | a      | -       | 965      | - | 1   | 667       | 2   | 127       | 7   | 46        |
|         |   |        |         |          |   | 0.5 |           | 0.6 |           | 0.9 |           |
|         | R | miR-20 |         | 0.921311 |   | 25  | -0.092362 | 04  | 0.104255  | 58  | 0.011893  |
| Jejunum | S | 0a     | -       | 491      | - | 9   | 393       | 5   | 551       | 6   | 158       |
|         |   |        |         |          |   | 0.9 |           | 0.0 |           | 0.0 |           |
|         | R | miR-20 |         | 0.949795 |   | 83  | 0.003240  | 13  | 0.375872  | 46  | 0.379112  |
| Jejunum | S | a      | -       | 662      | - | 2   | 452       | 1   | 419       | 9   | 871       |
| Jejunum | R | miR-22 | 0.94549 | 0.956537 | - | 0.3 | -0.104512 | 0.0 | -0.173528 | 0.0 | -0.278040 |



|         |   |        |         |          |   |          |     |           |     |           |     |           |
|---------|---|--------|---------|----------|---|----------|-----|-----------|-----|-----------|-----|-----------|
|         | S | 1      | 4695    | 039      |   |          | 71  | 047       | 78  | 238       | 25  | 284       |
|         |   |        |         |          |   |          | 3   |           | 8   |           | 3   |           |
|         |   |        |         |          |   |          | 0.2 |           | 0.2 |           | 0.8 |           |
|         | R | miR-22 | 0.81430 | 0.813495 |   |          | 35  | -0.280107 | 89  | 0.280107  | 95  |           |
| Jejunum | S | 85c    | 81      | 695      | - | Positive | 5   | 919       | 2   | 919       | 8   | 0         |
|         |   |        |         |          |   |          | 0.0 |           |     |           | 0.8 |           |
|         | R | miR-32 | 0.85069 | 0.914004 |   |          | 51  | 0.352190  | 0.1 | -0.320597 | 74  | 0.031593  |
| Jejunum | S | 4      | 7286    | 022      | - | Positive | 2   | 934       | 46  | 809       | 7   | 125       |
|         |   |        |         |          |   |          | 0.8 |           | 0.4 |           | 0.3 |           |
|         | R | miR-33 | 0.83069 | 0.844979 |   |          | 16  | -0.048094 | 78  | -0.198545 | 82  | -0.246639 |
| Jejunum | S | b      | 1593    | 119      | - | Positive | 1   | 288       | 7   | 679       | 7   | 968       |
|         |   |        |         |          |   |          | 0.0 |           |     |           | 0.5 |           |
|         | R | miR-34 | 0.96464 |          |   |          | 60  | 0.409112  | 0.0 | -0.304479 | 54  | 0.104633  |
| Jejunum | S | 31     | 7613    | -        | - | Positive | 8   | 665       | 25  | 124       | 3   | 541       |
|         |   |        |         |          |   |          | 0.7 |           | <.0 |           | 0.0 |           |
|         | R | miR-42 | 0.84825 |          |   |          | 63  | -0.037535 | 00  | 1.153805  | 00  | 1.116269  |
| Jejunum | S | 5-3p   | 9559    | -        | - | Positive | 3   | 647       | 1   | 336       | 1   | 689       |
|         |   |        |         |          |   |          |     |           |     |           | 0.0 |           |
|         | R | miR-42 |         | 0.811187 |   |          | 0.3 | -0.192732 | 0.1 | -0.383028 | 30  | -0.575761 |
| Jejunum | S | 9      | -       | 93       | - | Positive | 41  | 153       | 33  | 936       | 7   | 088       |
|         |   |        |         |          |   |          | 0.0 |           | 0.7 |           | 0.1 |           |
|         | R | miR-45 |         | 0.833421 |   |          | 90  | 0.308429  | 04  | 0.055432  | 02  | 0.363862  |
| Jejunum | S | 5-3p   | -       | 938      | - | Positive | 8   | 847       | 7   | 391       | 9   | 238       |
|         |   |        |         |          |   |          | 0.2 |           | 0.9 |           | 0.2 |           |
|         | R | miR-49 | 0.81043 |          |   |          | 49  | 0.241008  | 65  |           | 46  | 0.241008  |
| Jejunum | S | 1      | 2165    | -        | - | Positive | 9   | 1         | 6   | 0         | 3   | 1         |
|         | R | miR-50 |         | 0.813948 |   |          | 0.4 | -0.082462 | 0.0 | -0.473931 | 0.0 | -0.556393 |
| Jejunum | S | 2a     | -       | 7        | - | Positive | 95  | 16        | 35  | 188       | 32  | 349       |

|         |   |        |         |          |           |     |           |     |           |     |           |
|---------|---|--------|---------|----------|-----------|-----|-----------|-----|-----------|-----|-----------|
|         |   |        |         |          |           | 2   |           | 7   |           | 2   |           |
|         |   |        |         |          |           | 0.2 |           | 0.0 |           | 0.0 |           |
|         | R | miR-61 |         | 0.884753 |           | 35  | -0.179108 | 05  | 0.534588  | 29  | 0.355480  |
| Jejunum | S | 19-3p  | -       | 01       | -         | 4   | 324       | 3   | 978       | 3   | 655       |
|         |   |        |         |          |           | 0.6 |           | 0.1 |           | 0.3 |           |
|         | R | miR-65 | 0.91074 |          |           | 11  | 0.142019  | 51  | -0.389946 | 75  | -0.247927 |
| Jejunum | S | 23     | 4842    | -        | -         | 7   | 005       | 5   | 518       | 1   | 513       |
|         |   |        |         |          |           | 0.6 |           | 0.3 |           | 0.5 |           |
|         | R | miR-67 |         | 0.821990 |           | 62  | 0.080919  | 43  | -0.206450 | 30  | -0.125530 |
| Jejunum | S | 1      | -       | 843      | -         | 6   | 995       | 8   | 877       | 5   | 882       |
|         |   |        |         |          |           | 0.0 |           | 0.0 |           |     |           |
|         | R | miR-76 | 0.87015 |          |           | 39  | 0.493040  | 06  | -0.704544 | 0.4 | -0.211504 |
| Jejunum | S | 0-3p   | 9807    | -        | -         | 7   | 011       | 8   | 116       | 18  | 105       |
|         |   |        |         |          |           | 0.9 |           | 0.0 |           | 0.0 |           |
|         | R | miR-76 | 0.83055 |          |           | 46  | 0.009690  | 47  | -0.485640 | 55  | -0.475950 |
| Jejunum | S | 9      | 7188    | -        | -         | 3   | 057       | 7   | 496       | 1   | 439       |
|         |   |        |         |          |           | 0.9 |           | 0.1 |           | 0.0 |           |
|         | R | miR-99 |         | 0.862002 |           | 56  | 0.009277  | 15  | 0.393481  | 98  | 0.402759  |
| Jejunum | S | a-3p   | -       | 969      | -         | 8   | 814       | 4   | 356       | 6   | 17        |
|         |   |        |         |          |           | 0.4 |           | 0.0 |           | 0.0 |           |
|         | R | miR-34 |         |          | -0.947368 | 75  | 0.167186  | 11  | 0.355553  | 64  | 0.522739  |
| Jejunum | S | 32     | -       | -        | 308       | 5   | 919       | 8   | 066       | 9   | 986       |
|         |   |        |         |          |           | 0.0 |           | 0.2 |           | 0.6 |           |
|         | R | miR-48 |         |          | -0.942842 | 00  | 0.933389  | 17  | -0.724708 | 35  | 0.208681  |
| Jejunum | S | 6      | -       | -        | 301       | 7   | 437       | 9   | 128       | 6   | 309       |
|         |   |        |         |          |           | 0.1 |           | 0.0 |           | 0.6 |           |
|         | R | miR-19 |         |          | -0.920400 | 57  | 0.265382  | 19  | -0.337817 | 89  | -0.072435 |
| Jejunum | S | 3b     | -       | -        | 061       | 1   | 161       | 3   | 997       | 2   | 836       |

|         |   |        |         |           |           |          |  |     |           |     |          |     |           |
|---------|---|--------|---------|-----------|-----------|----------|--|-----|-----------|-----|----------|-----|-----------|
|         |   |        |         |           |           |          |  | 0.2 |           | 0.0 |          | 0.0 |           |
|         | R | miR-18 |         |           | -0.860130 |          |  | 05  | 0.252692  | 14  | 0.485426 | 07  | 0.738119  |
| Jejunum | S | 5      | -       | -         | 744       | Negative |  | 8   | 462       | 8   | 827      | 6   | 289       |
|         |   |        |         |           |           |          |  | 0.1 |           | <.0 |          | 0.0 |           |
|         | R | miR-12 |         |           | -0.821671 |          |  | 90  | 0.431157  | 00  | 2.258502 | 00  | 2.689659  |
| Jejunum | S | 71     | -       | -         | 013       | Negative |  | 1   | 165       | 1   | 715      | 8   | 879       |
|         |   |        |         |           |           |          |  | 0.0 |           | 0.2 |          | 0.0 |           |
|         | R | miR-87 |         |           | -0.810729 |          |  | 15  | 0.379848  | 89  | 0.185214 | 02  | 0.565062  |
| Jejunum | S | 4      | -       | -         | 811       | Negative |  | 6   | 071       | 2   | 872      | 6   | 943       |
|         |   |        |         |           |           |          |  | 0.1 |           | 0.0 |          | 0.0 |           |
|         | R | miR-99 |         |           | -0.810112 |          |  | 85  | 0.279081  | 00  | 1.055516 | 01  | 1.334597  |
| Jejunum | S | a-5p   | -       | -         | 821       | Negative |  | 2   | 56        | 1   | 051      | 5   | 611       |
|         |   |        |         |           |           |          |  |     |           | 0.3 |          | 0.3 |           |
|         | R | miR-12 |         | -0.816652 |           |          |  | 0.1 | -1.083055 | 17  | 0.742018 | 01  | -0.341036 |
| Jejunum | S | 46     | -       | 076       | -         | Negative |  | 9   | 74        | 4   | 822      | 4   | 918       |
|         |   |        |         |           |           |          |  | 0.3 |           | 0.3 |          | 0.1 |           |
|         | R | miR-14 | -0.9332 |           |           |          |  | 55  | 0.176052  | 73  | 0.168377 | 87  | 0.344429  |
| Jejunum | S | 1      | 32058   | -         | -         | Negative |  | 3   | 404       | 1   | 22       | 4   | 623       |
|         |   |        |         |           |           |          |  | 0.1 |           | 0.0 |          |     |           |
|         | R | miR-15 | -0.8377 |           |           |          |  | 74  | 0.080124  | 21  | 0.179269 | 0.0 | 0.259394  |
| Jejunum | S | 1-3p   | 59844   | -         | -         | Negative |  | 9   | 748       | 4   | 942      | 07  | 69        |
|         |   |        |         |           |           |          |  | 0.8 |           | 0.0 |          | 0.0 |           |
|         | R | miR-22 | -0.8740 |           |           |          |  | 92  | -0.033748 | 00  | 0.679740 | 62  | 0.645991  |
| Jejunum | S | 85t    | 91758   | -         | -         | Negative |  | 2   | 791       | 4   | 725      | 7   | 934       |
|         |   |        |         |           |           |          |  | 0.1 |           | 0.1 |          | 0.6 |           |
|         | R | miR-24 | -0.9388 |           |           |          |  | 00  | -0.447458 | 86  | 0.321928 | 59  | -0.125530 |
| Jejunum | S | 11-5p  | 56266   | -         | -         | Negative |  | 3   | 977       | 3   | 095      | 7   | 882       |
| Jejunum | R | miR-37 | -0.8207 | -         | -         | Negative |  | 0.9 | 0.009202  | 0.0 | 0.695831 | 0.0 | 0.705033  |

|         |   |        |         |           |          |          |     |           |     |           |     |           |
|---------|---|--------|---------|-----------|----------|----------|-----|-----------|-----|-----------|-----|-----------|
|         | S | 4a     | 43167   |           |          |          | 48  | 066       | 01  | 348       | 04  | 414       |
|         |   |        |         |           |          |          | 1   |           | 3   |           | 1   |           |
|         |   |        |         |           |          |          | 0.2 |           | 0.8 |           | 0.2 |           |
|         | R | miR-37 | -0.8111 | -0.866850 |          |          | 14  | -0.295775 | 97  | -0.034765 | 27  | -0.330541 |
| Jejunum | S | 8b     | 77882   | 862       | -        | Negative | 6   | 807       | 6   | 418       | 8   | 225       |
|         |   |        |         |           |          |          | 0.7 |           | <.0 |           | 0.0 |           |
|         | R | miR-37 | -0.8278 |           |          |          | 31  | 0.066233  | 00  | 1.727315  | 00  | 1.793549  |
| Jejunum | S | 9      | 67559   | -         | -        | Negative | 3   | 698       | 1   | 424       | 1   | 123       |
|         |   |        |         |           |          |          | 0.6 |           | 0.1 |           | 0.1 |           |
|         | R | miR-50 | -0.8360 |           |          |          | 51  | 0.093109  | 15  | 0.736965  | 17  | 0.830074  |
| Jejunum | S | 3-3p   | 66203   | -         | -        | Negative | 9   | 404       | 4   | 594       | 6   | 999       |
|         |   |        |         |           |          |          | 0.8 |           |     |           | 0.1 |           |
|         | R | miR-65 |         | -0.845051 |          |          | 24  | 0.034889  | 0.0 | 0.293435  | 09  | 0.328325  |
| Jejunum | S | 24     | -       | 043       | -        | Negative | 8   | 982       | 76  | 884       | 7   | 866       |
|         |   |        |         |           |          |          | 0.1 |           | 0.0 |           | 0.4 |           |
|         | A | miR-18 |         |           | 0.829409 |          | 10  | -0.350876 | 64  | 0.489618  | 08  | 0.138741  |
| Liver   | L | 1b     | -       | -         | 482      | Positive | 4   | 395       | 1   | 151       | 7   | 756       |
|         |   |        |         |           |          |          | 0.1 |           | 0.5 |           | 0.2 |           |
|         | A | miR-45 |         |           | 0.863725 |          | 63  | -0.624104 | 27  | 0.282316  | 89  | -0.341788 |
| Liver   | L | 0a     | -       | -         | 68       | Positive | 1   | 756       | 8   | 239       | 2   | 517       |
|         |   |        |         |           |          |          |     |           |     |           | 0.2 |           |
|         | A | miR-24 |         |           | 0.864697 |          | 0.3 | -0.573163 | 0.7 | 0.135136  | 84  | -0.438027 |
| Liver   | L | 19-5p  | -       | -         | 264      | Positive | 58  | 929       | 73  | 078       | 4   | 852       |
|         |   |        |         |           |          |          | 0.4 |           | 0.1 |           | 0.2 |           |
|         | A | miR-18 |         |           | 0.914106 |          | 31  | -0.190885 | 11  | 0.457643  | 50  | 0.266758  |
| Liver   | L | 1a     | -       | -         | 663      | Positive | 8   | 097       | 3   | 137       | 5   | 04        |
|         | A | miR-18 | 0.81498 |           |          |          | 0.6 | -0.180572 | 0.2 | 0.502500  | 0.4 | 0.321928  |
| Liver   | L | 14c    | 7831    | -         | -        | Positive | 40  | 246       | 32  | 341       | 88  | 095       |

|       |   |         |         |          |           |          |     |           |     |           |     |           |
|-------|---|---------|---------|----------|-----------|----------|-----|-----------|-----|-----------|-----|-----------|
|       |   |         |         |          |           |          | 1   | 5         | 5   |           |     |           |
|       |   |         |         |          |           |          | 0.3 | 0.4       | 0.9 |           |     |           |
|       | A | miR-19  | 0.94148 | 0.831497 |           |          | 55  | -0.179099 | 66  | 0.165365  | 27  | -0.013733 |
| Liver | L | 9a-3p   | 8439    | 583      | -         | Positive | 8   | 018       | 5   | 28        | 8   | 738       |
|       |   |         |         |          |           |          | 0.6 | 0.2       | 0.4 |           |     |           |
|       | A | miR-23  | 0.81498 |          |           |          | 40  | -0.180572 | 32  | 0.502500  | 88  | 0.321928  |
| Liver | L | 10      | 7831    | -        | -         | Positive | 1   | 246       | 5   | 341       | 5   | 095       |
|       |   |         |         |          |           |          | 0.5 | 0.5       | 0.8 |           |     |           |
|       | A | miR-23  | 0.98324 | 0.924976 |           |          | 71  | -0.160464 | 06  | 0.247927  | 02  | 0.087462  |
| Liver | L | 99-5p   | 7736    | 527      | -         | Positive | 5   | 672       | 6   | 513       | 8   | 841       |
|       |   |         |         |          |           |          | 0.8 | 0.7       | 0.8 |           |     |           |
|       | A | miR-24  | 0.84396 |          |           |          | 10  | 0.125530  | 24  | -0.241008 | 31  | -0.115477 |
| Liver | L | 03      | 2132    | -        | -         | Positive | 9   | 882       | 7   | 1         | 8   | 217       |
|       |   |         |         |          |           |          | 0.5 |           | 0.5 |           |     |           |
|       | A | miR-44  | 0.95196 |          |           |          | 15  | 0.592342  | 0.9 | -0.065095 | 45  | 0.527247  |
| Liver | L | 9a      | 7575    | -        | -         | Positive | 1   | 031       | 41  | 028       | 8   | 003       |
|       |   |         |         |          |           |          | 0.7 | 0.0       | 0.0 |           |     |           |
|       | A |         |         |          | -0.909190 |          | 04  | -0.033981 | 80  | 0.170981  | 89  | 0.137000  |
| Liver | L | let-7g  | -       | -        | 72        | Negative | 2   | 359       | 2   | 465       | 4   | 106       |
|       |   |         |         |          |           |          | 0.3 | 0.1       | 0.4 |           |     |           |
|       | A | let-7a- |         |          | -0.889641 |          | 41  | -0.090577 | 15  | 0.147208  | 60  | 0.056631  |
| Liver | L | 5p      | -       | -        | 568       | Negative | 4   | 32        | 5   | 395       | 2   | 075       |
|       |   |         |         |          |           |          | 0.5 | 0.8       |     |           |     |           |
|       | A | miR-76  |         |          | -0.884390 |          | 34  | 0.347923  | 77  |           | 0.5 | 0.347923  |
| Liver | L | 0-3p    | -       | -        | 438       | Negative | 7   | 303       | 7   | 0         | 42  | 303       |
|       |   |         |         |          |           |          |     |           | 0.9 |           | 0.7 |           |
|       | A | miR-26  |         |          | -0.874418 |          | 0.7 | 0.033611  | 91  | 0.000766  | 29  | 0.034378  |
| Liver | L | b       | -       | -        | 456       | Negative | 17  | 835       | 2   | 283       | 5   | 117       |

|       |   |        |         |           |           |          |     |           |     |           |     |           |
|-------|---|--------|---------|-----------|-----------|----------|-----|-----------|-----|-----------|-----|-----------|
|       |   |        |         |           |           |          | 0.3 |           | 0.0 |           | 0.6 |           |
|       | A | miR-14 |         |           | -0.851137 |          | 27  | 0.101664  | 28  | -0.145459 | 58  | -0.043795 |
| Liver | L | 0      | -       | -         | 476       | Negative | 9   | 092       | 4   | 397       | 5   | 305       |
|       |   |        |         |           |           |          | 0.6 |           | 0.5 |           | 0.3 |           |
|       | A | miR-36 |         |           | -0.836475 |          | 23  | 0.096215  | 90  | 0.103093  | 48  | 0.199308  |
| Liver | L | 5-5p   | -       | -         | 37        | Negative | 2   | 315       | 8   | 493       | 9   | 808       |
|       |   |        |         |           |           |          | 0.2 |           | 0.1 |           | 0.7 |           |
|       | A | miR-17 |         |           | -0.816379 |          | 72  | -0.138328 | 59  | 0.184424  | 88  | 0.046096  |
| Liver | L | -3p    | -       | -         | 337       | Negative | 2   | 157       | 6   | 571       | 2   | 415       |
|       |   |        |         |           |           |          | 0.3 |           | 0.0 |           | 0.0 |           |
|       | A |        | -0.8198 | -0.848622 |           |          | 44  | -0.514573 | 45  | -0.722466 | 01  | -1.237039 |
| Liver | L | miR-1  | 33429   | 469       | -         | Negative | 9   | 173       | 6   | 024       | 8   | 197       |
|       |   |        |         |           |           |          | 0.9 |           | 0.6 |           |     |           |
|       | A | miR-13 |         |           | -0.900926 |          | 60  | -0.013631 | 25  | -0.145294 | 0.5 | -0.158926 |
| Liver | L | 3a     | -       | 683       | -         | Negative | 2   | 866       | 6   | 137       | 77  | 002       |
|       |   |        |         |           |           |          | 0.6 |           | 0.6 |           | 0.3 |           |
|       | A | miR-19 | -0.8113 |           |           |          | 56  | 0.076235  | 51  | 0.092364  | 14  | 0.168599  |
| Liver | L | 3a-5p  | 85098   | -         | -         | Negative | 4   | 586       | 2   | 018       | 2   | 604       |
|       |   |        |         |           |           |          | 0.6 |           | 0.6 |           | 0.9 |           |
|       | A | miR-22 | -0.8311 | -0.862600 |           |          | 31  | -0.150416 | 19  | 0.158365  | 59  | 0.007948  |
| Liver | L | 85e    | 67515   | 041       | -         | Negative | 1   | 843       | 8   | 596       | 9   | 753       |
|       |   |        |         |           |           |          |     |           | 0.9 |           | 0.6 |           |
|       | A | miR-37 |         |           | -0.909938 |          | 0.7 | -0.140177 | 51  | -0.052467 | 61  | -0.192645 |
| Liver | L | 6e     | -       | 92        | -         | Negative | 54  | 658       | 4   | 42        | 4   | 078       |
|       |   |        |         |           |           |          | 0.6 |           | 0.2 |           | 0.1 |           |
|       | A | miR-42 | -0.8911 | -0.891901 |           |          | 97  | -0.050169 | 57  | 0.193166  | 95  | 0.142997  |
| Liver | L | 1      | 90145   | 45        | -         | Negative | 6   | 596       | 8   | 943       | 5   | 346       |
| Liver | A | miR-45 | -0.8565 | -0.895973 | -         | Negative | 0.5 | -0.347019 | 0.7 | 0.186364  | 0.5 | -0.160654 |

|       |   |        |         |           |     |          |     |           |     |           |     |           |
|-------|---|--------|---------|-----------|-----|----------|-----|-----------|-----|-----------|-----|-----------|
|       | L | 5-3p   | 73325   | 995       |     |          | 73  | 076       | 43  | 112       | 45  | 964       |
|       |   |        |         |           |     |          |     |           | 3   |           | 1   |           |
|       |   |        |         |           |     |          |     |           | 0.8 |           | 0.8 |           |
|       | A | miR-50 |         | -0.867967 |     |          |     | -0.078002 | 26  | 0.078002  | 26  |           |
| Liver | L | 2a     | -       | 164       | -   | Negative | 0.6 | 512       | 8   | 512       | 3   | 0         |
|       |   |        |         |           |     |          | 0.4 |           | 0.2 |           |     |           |
|       | A | miR-67 | -0.8381 | -0.836160 |     |          | 48  | 0.131244  | 86  | -0.251538 | 0.6 | -0.120294 |
| Liver | L | 1      | 02807   | 122       | -   | Negative | 1   | 533       | 8   | 767       | 26  | 234       |
|       |   |        |         |           |     |          | 0.6 |           | 0.6 |           | 0.9 |           |
|       | C | miR-22 |         | 0.846756  |     |          | 31  | -0.150416 | 19  | 0.158365  | 59  | 0.007948  |
| Liver | S | 85e    | -       | -         | 138 | Positive | 1   | 843       | 8   | 596       | 9   | 753       |
|       |   |        |         |           |     |          | 0.9 |           | 0.1 |           | 0.2 |           |
|       | C | miR-50 |         | 0.857821  |     |          | 87  |           | 72  | -0.253756 | 19  | -0.253756 |
| Liver | S | 0      | -       | -         | 023 | Positive | 5   | 0         | 1   | 592       | 3   | 592       |
|       |   |        |         |           |     |          | 0.6 |           | 0.7 |           | 0.8 |           |
|       | C | miR-14 |         | 0.867948  |     |          | 22  | -0.055360 | 42  | 0.029950  | 24  | -0.025409 |
| Liver | S | 8a     | -       | -         | 99  | Positive | 8   | 386       | 2   | 813       | 1   | 573       |
|       |   |        |         |           |     |          |     |           | 0.6 |           | 0.3 |           |
|       | C | miR-20 |         | 0.939158  |     |          | 0.6 | -0.094437 | 00  | -0.081808 | 21  | -0.176245 |
| Liver | S | a      | -       | -         | 55  | Positive | 12  | 464       | 3   | 344       | 2   | 808       |
|       |   |        |         |           |     |          | 0.6 |           | 0.8 |           | 0.5 |           |
|       | C | miR-19 |         | 0.976418  |     |          | 89  | 0.070389  | 34  | 0.036525  | 40  | 0.106915  |
| Liver | S | 7      | -       | -         | 096 | Positive | 2   | 328       | 1   | 876       | 4   | 204       |
|       |   |        |         |           |     |          | 0.6 |           |     |           | 0.1 |           |
|       | C | miR-15 |         | 0.828357  |     |          | 47  | -0.075546 | 0.4 | -0.109391 | 14  | -0.184938 |
| Liver | S | 2      | -       | 734       | -   | Positive | 7   | 932       | 83  | 934       | 2   | 867       |
|       | C | miR-20 |         | 0.821738  |     |          | 0.3 | 8.730753  | <.0 | -4.087462 | 0.3 | 4.643290  |
| Liver | S | 5      | -       | 504       | -   | Positive | 40  | 157       | 00  | 841       | 57  | 316       |

|       |   |        |         |          |   |     |           |     |           |     |           |
|-------|---|--------|---------|----------|---|-----|-----------|-----|-----------|-----|-----------|
|       |   |        |         |          |   | 4   |           | 1   |           | 9   |           |
|       |   |        |         |          |   | 0.2 |           | 0.3 |           | 0.1 |           |
|       | C | miR-22 |         | 0.940064 |   | 08  | 0.243454  | 30  | 0.144948  | 01  | 0.388402  |
| Liver | S | 84aa   | -       | 48       | - | 4   | 037       | 6   | 336       | 7   | 373       |
|       |   |        |         |          |   | 0.6 |           | 0.4 |           | 0.6 |           |
|       | C | miR-22 |         | 0.830446 |   | 63  | -0.089267 | 91  | 0.184424  | 97  | 0.095157  |
| Liver | S | 84y    | -       | 96       | - | 9   | 338       | 8   | 571       | 2   | 233       |
|       |   |        |         |          |   | 0.7 |           | 0.7 |           | 0.9 |           |
|       | C |        |         | 0.848127 |   | 06  | 0.071258  | 12  | -0.053771 | 62  | 0.017487  |
| Liver | S | miR-24 | -       | 981      | - | 2   | 683       | 4   | 256       | 1   | 427       |
|       |   |        |         |          |   |     |           |     |           | 0.2 |           |
|       | C | miR-24 |         | 0.856740 |   | 0.3 | -0.573163 | 0.7 | 0.135136  | 84  | -0.438027 |
| Liver | S | 19-5p  | -       | 298      | - | 58  | 929       | 73  | 078       | 4   | 852       |
|       |   |        |         |          |   | 0.8 |           | 0.9 |           | 0.8 |           |
|       | C | miR-30 |         | 0.838454 |   | 40  | -0.106915 | 80  |           | 59  | -0.106915 |
| Liver | S | b-3p   | -       | 144      | - | 8   | 204       | 9   | 0         | 7   | 204       |
|       |   |        |         |          |   | 0.6 |           | 0.5 |           | 0.3 |           |
|       | C | miR-36 |         | 0.876009 |   | 23  | 0.096215  | 90  | 0.103093  | 48  | 0.199308  |
| Liver | S | 5-5p   | -       | 64       | - | 2   | 315       | 8   | 493       | 9   | 808       |
|       |   |        |         |          |   | 0.1 |           | 0.5 |           | 0.3 |           |
|       | C | miR-37 | 0.86248 |          |   | 38  | 0.242430  | 15  | -0.081714 | 15  | 0.160715  |
| Liver | S | 4b     | 0894    | -        | - | 6   | 175       | 7   | 65        | 7   | 525       |
|       |   |        |         |          |   | 0.5 |           | 0.0 |           | 0.3 |           |
|       | C | miR-37 | 0.87654 |          |   | 91  | 0.418879  | 46  | 0.548869  | 00  | 0.967749  |
| Liver | S | 5      | 676     | -        | - | 8   | 566       | 9   | 498       | 7   | 064       |
|       |   |        |         |          |   | 0.6 |           |     |           | 0.8 |           |
|       | C | miR-53 |         | 0.877923 |   | 40  | 0.075208  | 0.5 | -0.043779 | 31  | 0.031429  |
| Liver | S | 2      | -       | 12       | - | 3   | 82        | 86  | 573       | 5   | 247       |



|       |   |        |         |   |           |          |     |           |     |           |     |           |             |
|-------|---|--------|---------|---|-----------|----------|-----|-----------|-----|-----------|-----|-----------|-------------|
|       |   |        |         |   |           |          | 0.7 |           | 0.3 |           | 0.4 |           |             |
|       | C | miR-9- | 0.86979 |   |           |          | 33  | -0.166897 | 34  | 0.451874  | 28  | 0.284976  |             |
| Liver | S | 5p     | 4543    | - | -         | Positive | 8   | 309       | 7   | 267       | 8   | 959       |             |
|       |   |        |         |   |           |          | 0.7 |           | 0.9 |           |     |           |             |
|       | C |        |         |   |           |          | 39  | 0.052674  | 11  | 0.020126  | 0.6 | 0.072800  |             |
| Liver | S | let-7c | -       | - | 983       | Negative | 5   | 03        | 3   | 028       | 06  | 058       |             |
|       |   |        |         |   |           |          | 0.2 |           | 0.9 |           |     |           |             |
|       | C | miR-27 |         |   |           |          | 74  | 0.612976  | 26  | -0.082462 | 0.3 | 0.530514  |             |
| Liver | S | a-5p   | -       | - | 473       | Negative | 7   | 877       | 4   | 16        | 11  | 717       |             |
|       |   |        |         |   |           |          | 0.2 |           | 0.7 |           | 0.4 |           |             |
|       | C |        |         |   |           |          | 45  | 0.111351  | 14  | -0.025479 | 32  | 0.085871  |             |
| Liver | S | let-7b | -       | - | 969       | Negative | 5   | 424       | 8   | 586       | 2   | 838       |             |
|       |   |        |         |   |           |          | 0.2 |           | 0.7 |           | 0.2 |           |             |
|       | C | miR-34 |         |   |           |          | 88  | -0.618129 | 47  | -0.203533 | 22  | -0.821662 |             |
| Liver | S | c      | -       | - | 687       | Negative | 1   | 365       | 1   | 394       | 5   | 759       |             |
|       |   |        |         |   |           |          | 0.3 |           | 0.4 |           | 0.9 |           |             |
|       | C | miR-19 |         |   |           |          | 55  | -0.179099 | 66  | 0.165365  | 27  | -0.013733 |             |
| Liver | S | 9a-3p  | -       | - | 947       | Negative | 8   | 018       | 5   | 28        | 8   | 738       |             |
|       |   |        |         |   |           |          | 0.6 |           | 0.4 |           | 0.6 |           |             |
|       | C | miR-19 |         |   |           |          | 41  | 0.100730  | 34  | -0.263034 | 10  | -0.162303 |             |
| Liver | S | 9c     | -       | - | 583       | Negative | 7   | 632       | 5   | 406       | 2   | 774       |             |
|       |   |        |         |   |           |          | 0.8 |           | 0.8 |           | 0.9 |           |             |
|       | C | miR-99 |         |   |           |          | 78  | 0.020536  | 82  | -0.028163 | 61  | -0.007626 |             |
| Liver | S | a-3p   | -       | - | 11        | Negative | 5   | 931       | 3   | 53        | 9   | 599       |             |
|       |   |        |         |   |           |          | 0.1 |           |     |           | 0.2 |           |             |
|       | C | miR-65 |         |   |           |          | 01  | -0.559427 | 0.5 | 0.222392  | 64  | -0.337034 |             |
| Liver | S | 22     | -       | - | 816       | Negative | 6   | 409       | 78  | 421       | 2   | 987       |             |
| Liver | C | miR-18 | -       | - | -0.897647 | Negative | 0.9 | 0.030161  | 0.5 | 0.149747  | 0.4 | 0.179909  | Liver(Down) |

|       |   |        |   |   |           |          |     |           |     |           |     |           |
|-------|---|--------|---|---|-----------|----------|-----|-----------|-----|-----------|-----|-----------|
|       | S | 1d     |   |   | 628       |          | 26  | 971       | 67  | 12        | 66  | 09        |
|       |   |        |   |   |           |          | 5   |           | 9   |           | 5   |           |
|       |   |        |   |   |           |          |     |           | 0.2 |           | 0.2 |           |
|       | C | miR-21 |   |   | -0.888738 |          | 0.7 | 0.035352  | 01  | -0.315744 | 42  | -0.280391 |
| Liver | S | 4      | - | - | 917       | Negative | 85  | 978       | 1   | 223       | 1   | 245       |
|       |   |        |   |   |           |          | 0.8 |           | 0.0 |           | 0.1 |           |
|       | C | miR-15 |   |   | -0.886560 |          | 12  | -0.071083 | 31  | 0.595721  | 12  | 0.524638  |
| Liver | S | 5      | - | - | 823       | Negative | 9   | 098       | 4   | 847       | 5   | 749       |
|       |   |        |   |   |           |          | 0.6 |           | 0.5 |           | 0.4 |           |
|       | C | miR-27 |   |   | -0.881092 |          | 08  | 0.067906  | 42  | 0.043498  | 28  | 0.111405  |
| Liver | S | a-3p   | - | - | 605       | Negative | 5   | 13        | 1   | 889       | 1   | 018       |
|       |   |        |   |   |           |          | 0.7 |           | 0.4 |           | 0.5 |           |
|       | C | miR-19 |   |   | -0.869198 |          | 08  | 0.070962  | 00  | -0.260342 | 53  | -0.189380 |
| Liver | S | 5      | - | - | 668       | Negative | 2   | 424       | 8   | 69        | 2   | 267       |
|       |   |        |   |   |           |          | 0.7 |           | 0.8 |           | 0.9 |           |
|       | C | miR-19 |   |   | -0.867222 |          | 14  | 0.159070  | 03  | -0.126007 | 45  | 0.033062  |
| Liver | S | 9b     | - | - | 448       | Negative | 5   | 418       | 1   | 885       | 1   | 533       |
|       |   |        |   |   |           |          | 0.3 |           | 0.7 |           | 0.5 |           |
|       | C | miR-13 |   |   | -0.859998 |          | 92  | -0.163249 | 22  | 0.070931  | 52  | -0.092317 |
| Liver | S | 0a     | - | - | 459       | Negative | 6   | 576       | 6   | 623       | 1   | 953       |
|       |   |        |   |   |           |          | 0.4 |           | 0.3 |           | 0.2 |           |
|       | C | miR-50 |   |   | -0.854587 |          | 79  | 0.519374  | 70  | 0.514573  | 45  | 1.033947  |
| Liver | S | 4      | - | - | 073       | Negative | 4   | 159       | 3   | 173       | 2   | 332       |
|       |   |        |   |   |           |          | 0.6 |           | 0.2 |           | 0.3 |           |
|       | C | miR-21 |   |   | -0.847169 |          | 11  | 0.119839  | 64  | -0.565904 | 51  | -0.446064 |
| Liver | S | 8      | - | - | 161       | Negative | 1   | 77        | 4   | 165       | 5   | 395       |
|       |   |        |   |   |           |          | 0.8 | 0.027005  | 0.4 | -0.215771 | 0.4 | -0.188766 |
| Liver | S | 9a-5p  | - | - | 265       | Negative | 78  | 387       | 11  | 823       | 64  | 436       |



|       |   |        |       |           |           |     |           |           |           |           |           |           |
|-------|---|--------|-------|-----------|-----------|-----|-----------|-----------|-----------|-----------|-----------|-----------|
|       |   |        |       |           |           | 0.5 |           | 0.6       |           | 0.2       |           |           |
|       | C | miR-20 |       | -0.857972 |           | 87  | -0.177363 | 48        | -0.117871 | 45        | -0.295234 |           |
| Liver | S | 4      | -     | 711       | -         | 6   | 299       | 3         | 058       | 8         | 356       |           |
|       |   |        |       |           |           | 0.2 |           | 0.7       |           | 0.3       |           |           |
|       | C | miR-22 |       | -0.8233   |           | 41  | 0.263668  | 99        | -0.052331 | 06        | 0.211337  |           |
| Liver | S | 85k    | 89091 | -         | -         | 1   | 697       | 8         | 464       | 9         | 233       |           |
|       |   |        |       |           |           |     |           | 0.7       |           | 0.5       |           |           |
|       | C | miR-45 |       | -0.9147   |           | 0.5 | -0.347019 | 43        | 0.186364  | 45        | -0.160654 |           |
| Liver | S | 5-3p   | 49849 | -         | -         | 73  | 076       | 3         | 112       | 1         | 964       |           |
|       |   |        |       |           |           | 0.1 |           |           |           | 0.1       |           |           |
|       | C | miR-48 |       | -0.8517   |           | 46  | 0.383328  | 0.9       | -0.012490 | 25        | 0.370837  |           |
| Liver | S | 3      | 89297 | -         | -         | 5   | 64        | 58        | 944       | 6         | 695       |           |
|       |   |        |       |           |           | 0.4 |           | 0.9       |           | 0.2       |           |           |
|       | C | miR-48 |       | -0.8639   |           | 35  | 0.119379  | 73        | 0.005088  | 96        | 0.124468  |           |
| Liver | S | 4      | 93079 | -         | -         | 9   | 56        | 5         | 877       | 7         | 436       |           |
|       |   |        |       |           |           | 0.4 |           | 0.5       |           | 0.7       |           |           |
|       | C | miR-50 |       | -0.8864   | -0.836889 | 52  | 0.190331  | 47        | -0.123988 | 55        | 0.066342  |           |
| Liver | S | 2b     | 11461 | 06        | -         | 9   | 212       | 3         | 717       | 7         | 495       | Liver(Up) |
|       |   |        |       |           |           | 0.1 |           | 0.0       |           | 0.6       |           |           |
|       | C | miR-59 |       | -0.842399 |           | 17  | -0.652076 | 79        | 0.781359  | 68        | 0.129283  |           |
| Liver | S | 2      | -     | 345       | -         | 2   | 697       | 9         | 714       | 3         | 017       |           |
|       |   |        |       |           |           | 0.2 |           | 0.5       |           | 0.1       |           |           |
|       | C | miR-65 |       | -0.8111   |           | 53  | 0.271302  | 56        | 0.099281  | 02        | 0.370583  |           |
| Liver | S | 2      | 95195 | -         | -         | 7   | 022       | 5         | 879       | 4         | 901       |           |
|       |   |        |       |           |           | 0.8 |           |           |           | 0.0       |           |           |
|       | C | miR-65 |       | -0.8113   |           | 57  | -0.041820 | 0.0       | 0.669851  | 12        | 0.628031  |           |
| Liver | S | 20     | 03571 | -         | -         | 1   | 176       | 14        | 398       | 4         | 223       |           |
| Liver | C | miR-87 |       | -0.8593   | -0.891354 | -   | 0.8       | -0.028929 | 0.8       | -0.027557 | 0.7       | -0.056487 |

|       |   |        |   |       |  |          |          |     |           |     |           |     |           |             |
|-------|---|--------|---|-------|--|----------|----------|-----|-----------|-----|-----------|-----|-----------|-------------|
|       | S | 4      |   | 81532 |  | 819      |          |     | 82        | 257 | 82        | 934 | 67        | 191         |
|       |   |        |   |       |  |          |          |     |           |     | 1         |     | 4         |             |
|       |   |        |   |       |  |          |          | 0.3 |           |     | 0.4       |     | 0.0       |             |
|       | R |        |   |       |  | 0.815105 |          | 89  | 0.080533  | 80  | 0.052105  | 77  | 0.132639  |             |
| Liver | S | miR-25 | - | -     |  | 136      | Positive | 1   | 4         | 4   | 824       | 6   | 224       |             |
|       |   |        |   |       |  |          |          | 0.7 |           |     | 0.0       |     | 0.0       |             |
|       | R |        |   |       |  | 0.823922 |          | 04  | -0.033981 | 80  | 0.170981  | 89  | 0.137000  |             |
| Liver | S | let-7g | - | -     |  | 696      | Positive | 2   | 359       | 2   | 465       | 4   | 106       | Liver(Down) |
|       |   |        |   |       |  |          |          | 0.8 |           |     | 0.1       |     | 0.1       |             |
|       | R | miR-22 |   |       |  | 0.824523 |          | 19  | 0.045514  | 17  | 0.308122  | 56  | 0.353636  |             |
| Liver | S | 84z    | - | -     |  | 768      | Positive | 5   | 659       | 6   | 295       | 1   | 955       |             |
|       |   |        |   |       |  |          |          | 0.0 |           |     | 0.0       |     | 0.7       |             |
|       | R |        |   |       |  | 0.825703 |          | 81  | -0.286650 | 72  | 0.322019  | 66  | 0.035368  |             |
| Liver | S | miR-28 | - | -     |  | 2        | Positive | 5   | 568       | 4   | 123       | 4   | 555       |             |
|       |   |        |   |       |  |          |          | 0.1 |           |     | 0.0       |     | 0.7       |             |
|       | R | miR-92 |   |       |  | 0.826682 |          | 24  | -0.230020 | 82  | 0.284401  | 63  | 0.054381  |             |
| Liver | S | a      | - | -     |  | 752      | Positive | 7   | 436       | 1   | 441       | 4   | 005       |             |
|       |   |        |   |       |  |          |          | 0.3 |           |     | 0.7       |     | 0.3       |             |
|       | R | miR-28 |   |       |  | 0.828013 |          | 00  | 1.060153  | 60  | -0.140935 | 60  | 0.919217  |             |
| Liver | S | 87     | - | -     |  | 487      | Positive | 9   | 135       | 7   | 79        | 1   | 345       |             |
|       |   |        |   |       |  |          |          | 0.1 |           |     | 0.2       |     | 0.6       |             |
|       | R |        |   |       |  | 0.831421 |          | 25  | -0.362570 | 22  | 0.231325  | 74  | -0.131244 |             |
| Liver | S | miR-95 | - | -     |  | 058      | Positive | 6   | 079       | 8   | 546       | 8   | 533       |             |
|       |   |        |   |       |  |          |          | 0.1 |           |     |           |     | 0.6       |             |
|       | R | miR-12 |   |       |  | 0.837754 |          | 33  | -0.369456 | 0.2 | 0.278691  | 52  | -0.090765 |             |
| Liver | S | 8      | - | -     |  | 875      | Positive | 5   | 465       | 43  | 001       | 2   | 464       |             |
|       |   |        |   |       |  |          |          | 0.2 | 0.243454  | 0.3 | 0.144948  | 0.1 | 0.388402  |             |
| Liver | S | 84aa   | - | -     |  | 589      | Positive | 08  | 037       | 30  | 336       | 01  | 373       |             |

|       |   |        |         |   |          |     |           |     |           |     |           |                |
|-------|---|--------|---------|---|----------|-----|-----------|-----|-----------|-----|-----------|----------------|
|       |   |        |         |   |          | 4   |           | 6   |           | 7   |           |                |
|       |   |        |         |   |          |     |           | 0.7 |           | 0.1 |           |                |
| Liver | R | miR-24 |         |   | 0.841667 | 0.4 | -0.788495 | 64  | -0.144389 | 39  | -0.932885 |                |
|       | S | 19-3p  | -       | - | 453      | 73  | 895       | 1   | 909       | 9   | 804       |                |
|       |   |        |         |   |          | 0.8 |           | 0.7 |           | 0.6 |           |                |
| Liver | R | miR-33 |         |   | 0.863618 | 78  | -0.019003 | 08  | -0.075101 | 59  | -0.094105 |                |
|       | S | b      | -       | - | 322      | 6   | 942       | 8   | 455       | 7   | 397       |                |
|       |   |        |         |   |          | 0.5 |           | 0.0 |           | 0.3 |           |                |
| Liver | R | miR-37 |         |   | 0.869761 | 91  | 0.418879  | 46  | 0.548869  | 00  | 0.967749  |                |
|       | S | 5      | -       | - | 557      | 8   | 566       | 9   | 498       | 7   | 064       |                |
|       |   |        |         |   |          | 0.8 |           | 0.7 |           | 0.9 |           |                |
| Liver | R | miR-65 |         |   | 0.872084 | 11  | -0.064130 | 63  | 0.064130  | 94  |           |                |
|       | S | 17     | -       | - | 134      | 4   | 337       | 8   | 337       | 2   | 0         |                |
|       |   |        |         |   |          |     |           |     |           | 0.6 |           |                |
| Liver | R | miR-49 |         |   | 0.901360 | 0.0 | -0.402978 | 0.0 | 0.336227  | 80  | -0.066750 | Liver(Specific |
|       | S | 7      | -       | - | 068      | 25  | 123       | 8   | 885       | 8   | 237       | )              |
|       |   |        |         |   |          |     |           | 0.0 |           | 0.3 |           |                |
| Liver | R | miR-24 |         |   | 0.915160 | 0.1 | 1.276383  | 69  | -0.628369 | 45  | 0.648014  |                |
|       | S | 87     | -       | - | 958      | 29  | 959       | 8   | 288       | 3   | 671       |                |
|       |   |        |         |   |          | 0.3 |           | 0.5 |           | 0.1 |           |                |
| Liver | R | miR-24 |         |   | 0.948077 | 04  | 0.450265  | 24  | 0.215833  | 63  | 0.666099  |                |
|       | S | 78     | -       | - | 657      | 4   | 988       | 5   | 276       | 3   | 263       |                |
|       |   |        |         |   |          | 0.1 |           | 0.4 |           | 0.2 |           |                |
| Liver | R | miR-12 | 0.85548 |   |          | 60  | 1.035623  | 89  | -0.263034 | 41  | 0.772589  |                |
|       | S | 91     | 5102    | - | -        | 6   | 91        | 4   | 406       | 7   | 504       |                |
|       |   |        |         |   |          | 0.7 |           | 0.7 |           | 0.9 |           |                |
| Liver | R | miR-12 | 0.90494 |   |          | 50  | -0.125530 | 09  | 0.125530  | 38  |           |                |
|       | S | 9-3p   | 7898    | - | -        | 7   | 882       | 6   | 882       | 3   | 0         |                |

|       |   |        |         |          |           |          |     |           |     |           |     |           |             |
|-------|---|--------|---------|----------|-----------|----------|-----|-----------|-----|-----------|-----|-----------|-------------|
|       |   |        |         |          |           |          | 0.7 |           | 0.2 |           | 0.5 |           |             |
|       | R | miR-13 | 0.81019 |          |           |          | 69  | -0.100928 | 22  | 0.302562  | 00  | 0.201633  |             |
| Liver | S | 06     | 6676    | -        | -         | Positive | 8   | 909       | 6   | 77        | 6   | 861       |             |
|       |   |        |         |          |           |          | 0.2 |           | 0.1 |           | 0.7 |           |             |
|       | R | miR-21 | 0.86746 | 0.853782 |           |          | 86  | -0.447458 | 20  | 0.584962  | 43  | 0.137503  |             |
| Liver | S | 9-5p   | 0477    | 961      | -         | Positive | 4   | 977       | 9   | 501       | 6   | 524       |             |
|       |   |        |         |          |           |          | 0.7 |           | 0.7 |           | 0.5 |           |             |
|       | R | miR-24 |         | 0.851184 |           |          | 52  | -0.064130 | 59  | -0.120294 | 37  | -0.184424 |             |
| Liver | S | 68     | -       | 736      | -         | Positive | 4   | 337       | 1   | 234       | 8   | 571       |             |
|       |   |        |         |          |           |          | 0.8 |           | 0.9 |           | 0.8 |           |             |
|       | R | miR-30 | 0.93829 |          |           |          | 40  | -0.106915 | 80  |           | 59  | -0.106915 |             |
| Liver | S | b-3p   | 7434    | -        | -         | Positive | 8   | 204       | 9   | 0         | 7   | 204       |             |
|       |   |        |         |          |           |          | 0.1 |           | 0.4 |           | 0.2 |           |             |
|       | R | miR-36 | 0.86056 | 0.810548 |           |          | 50  | -0.347923 | 32  | 0.129283  | 18  | -0.218640 |             |
| Liver | S | 13     | 2897    | 658      | -         | Positive | 9   | 303       | 2   | 017       | 6   | 286       |             |
|       |   |        |         |          |           |          | 0.9 |           | 0.4 |           | 0.5 |           |             |
|       | R | miR-15 |         |          | -0.963597 |          | 47  | 0.008322  | 64  | -0.104138 | 24  | -0.095816 |             |
| Liver | S | 1-5p   | -       | -        | 472       | Negative | 5   | 578       | 5   | 841       | 2   | 264       |             |
|       |   |        |         |          |           |          | 0.4 |           | 0.3 |           |     |           |             |
|       | R | miR-23 |         |          | -0.948770 |          | 98  | 0.141940  | 55  | -0.148716 | 0.9 | -0.006775 |             |
| Liver | S | a      | -       | -        | 277       | Negative | 9   | 945       | 4   | 445       | 77  | 501       |             |
|       |   |        |         |          |           |          | 0.0 |           | 0.0 |           | 0.8 |           |             |
|       | R |        |         |          | -0.901553 |          | 74  | 0.592575  | 17  | -0.652076 | 43  | -0.059501 |             |
| Liver | S | miR-7  | -       | -        | 119       | Negative | 6   | 685       | 7   | 697       | 1   | 012       |             |
|       |   |        |         |          |           |          | 0.4 |           | 0.1 |           | 0.4 |           |             |
|       | R | miR-36 |         |          | -0.899821 |          | 83  | 0.091565  | 46  | -0.188848 | 38  | -0.097282 |             |
| Liver | S | 1      | -       | -        | 158       | Negative | 6   | 353       | 5   | 161       | 7   | 808       |             |
| Liver | R | miR-10 | -       | -        | -0.897715 | Negative | 0.5 | 0.099553  | 0.2 | -0.398690 | 0.3 | -0.299137 | Liver(Down) |

|       |   |        |   |   |           |          |     |           |     |           |     |           |
|-------|---|--------|---|---|-----------|----------|-----|-----------|-----|-----------|-----|-----------|
|       | S | 0      |   |   | 413       |          | 83  | 924       | 53  | 968       | 78  | 044       |
|       |   |        |   |   |           |          | 2   |           |     |           | 4   |           |
|       |   |        |   |   |           |          | 0.2 |           | 0.2 |           | 0.5 |           |
|       | R | miR-99 |   |   | -0.887855 |          | 28  | 0.258908  | 36  | -0.477121 | 75  | -0.218213 |
| Liver | S | a-5p   | - | - | 645       | Negative | 5   | 149       | 2   | 649       | 1   | 5         |
|       |   |        |   |   |           |          | 0.0 |           | 0.0 |           | 0.9 |           |
|       | R | miR-37 |   |   | -0.870473 |          | 70  | 0.415695  | 62  | -0.416353 | 97  | -0.000657 |
| Liver | S | 4a     | - | - | 843       | Negative | 3   | 513       | 5   | 227       | 2   | 714       |
|       |   |        |   |   |           |          | 0.1 |           | 0.0 |           | 0.6 |           |
|       | R | miR-24 |   |   | -0.848797 |          | 06  | 0.525356  | 47  | -0.700513 | 18  | -0.175156 |
| Liver | S | -3p    | - | - | 89        | Negative | 9   | 985       | 2   | 618       | 6   | 634       |
|       |   |        |   |   |           |          |     |           | 0.6 |           | 0.8 |           |
|       | R | miR-19 |   |   | -0.847180 |          | 0.6 | 0.071157  | 99  | -0.056037 | 74  | 0.015120  |
| Liver | S | 2      | - | - | 199       | Negative | 01  | 845       | 4   | 034       | 7   | 811       |
|       |   |        |   |   |           |          | 0.2 |           | 0.7 |           | 0.3 |           |
|       | R | miR-22 |   |   | -0.829806 |          | 41  | 0.263668  | 99  | -0.052331 | 06  | 0.211337  |
| Liver | S | 85k    | - | - | 774       | Negative | 1   | 697       | 8   | 464       | 9   | 233       |
|       |   |        |   |   |           |          | 0.1 |           | 0.1 |           | 0.6 |           |
|       | R | miR-21 |   |   | -0.824079 |          | 47  | 0.472170  | 71  | -0.351531 | 88  | 0.120638  |
| Liver | S | -3p    | - | - | 486       | Negative | 5   | 73        | 3   | 808       | 3   | 923       |
|       |   |        |   |   |           |          | 0.6 |           | 0.2 |           | 0.4 |           |
|       | R | miR-18 |   |   | -0.820089 |          | 40  | -0.180572 | 32  | 0.502500  | 88  | 0.321928  |
| Liver | S | 14c    | - | - | 163       | Negative | 1   | 246       | 5   | 341       | 5   | 095       |
|       |   |        |   |   |           |          | 0.6 |           | 0.2 |           | 0.4 |           |
|       | R | miR-23 |   |   | -0.820089 |          | 40  | -0.180572 | 32  | 0.502500  | 88  | 0.321928  |
| Liver | S | 10     | - | - | 163       | Negative | 1   | 246       | 5   | 341       | 5   | 095       |
|       | R | miR-18 |   |   | -0.818464 |          | 0.9 | -0.024045 | 0.3 | -0.290590 | 0.5 | -0.314635 |
| Liver | S | 3      | - | - | 279       | Negative | 77  | 474       | 17  | 128       | 78  | 602       |



|       |   |        |         |           |           |          |     |           |     |           |    |           |
|-------|---|--------|---------|-----------|-----------|----------|-----|-----------|-----|-----------|----|-----------|
|       |   |        |         |           |           |          | 8   | 9         | 1   |           |    |           |
|       |   |        |         |           |           |          | 0.2 | 0.2       | 0.7 |           |    |           |
|       | R | miR-19 |         |           | -0.815577 |          | 75  | 0.215459  | 32  | -0.268199 | 48 | -0.052739 |
| Liver | S | 1      | -       | -         | 372       | Negative | 1   | 707       | 5   | 141       | 7  | 434       |
|       |   |        |         |           |           |          | 0.3 | 0.5       | 0.5 |           |    |           |
|       | R | miR-11 | -0.8586 |           |           |          | 19  | -0.522421 | 26  | 0.303780  | 42 | -0.218640 |
| Liver | S | 85     | 19105   | -         | -         | Negative | 6   | 035       | 1   | 748       | 5  | 286       |
|       |   |        |         |           |           |          |     | 0.4       | 0.1 |           |    |           |
|       | R | miR-15 | -0.8251 | -0.829562 |           |          | 0.1 | -0.784271 | 25  | 0.339486  | 47 | -0.444784 |
| Liver | S | 4b     | 3831    | 645       | -         | Negative | 43  | 309       | 2   | 466       | 1  | 843       |
|       |   |        |         |           |           |          | 0.2 | 0.6       | 0.5 |           |    |           |
|       | R | miR-18 |         | -0.961828 |           |          | 87  | -0.242570 | 26  | 0.102957  | 42 | -0.139613 |
| Liver | S | 1c     | -       | 734       | -         | Negative | 5   | 303       | 8   | 19        | 1  | 113       |
|       |   |        |         |           |           |          | 0.5 | 0.7       | 0.6 |           |    |           |
|       | R | miR-18 |         | -0.893541 |           |          | 13  | -0.286304 | 52  | 0.100824  | 56 | -0.185479 |
| Liver | S | 2      | -       | 442       | -         | Negative | 4   | 185       | 4   | 37        | 4  | 816       |
|       |   |        |         |           |           |          | 0.3 | 0.8       | 0.1 |           |    |           |
|       | R | miR-23 | -0.8603 |           |           |          | 38  | 0.415037  | 06  | 0.125530  | 73 | 0.540568  |
| Liver | S | 76     | 81973   | -         | -         | Negative | 6   | 499       | 6   | 882       | 9  | 381       |
|       |   |        |         |           |           |          | 0.8 | 0.7       | 0.8 |           |    |           |
|       | R | miR-24 | -0.8948 | -0.984902 |           |          | 10  | 0.125530  | 24  | -0.241008 | 31 | -0.115477 |
| Liver | S | 03     | 83834   | 674       | -         | Negative | 9   | 882       | 7   | 1         | 8  | 217       |
|       |   |        |         |           |           |          | 0.8 | 0.3       | 0.4 |           |    |           |
|       | R | miR-36 |         | -0.831487 |           |          | 02  | -0.099535 | 90  | 0.282399  | 85 | 0.182864  |
| Liver | S | 3      | -       | 008       | -         | Negative | 4   | 674       | 2   | 731       | 8  | 057       |
|       |   |        |         |           |           |          | 0.8 | 0.7       | 0.9 |           |    |           |
|       | R | miR-37 | -0.8859 |           |           |          | 17  | 0.088536  | 32  | -0.122484 | 22 | -0.033947 |
| Liver | S | 6b     | 69555   | -         | -         | Negative | 4   | 675       | 8   | 007       | 1  | 332       |



|          |   |         |   |   |           |          |     |           |     |           |     |           |           |
|----------|---|---------|---|---|-----------|----------|-----|-----------|-----|-----------|-----|-----------|-----------|
| ry gland | S | 1       |   |   | 063       |          | 34  | 725       | 11  | 225       | 22  | 5         | Gland(Up) |
|          |   |         |   |   |           |          | 5   |           | 3   |           | 1   |           |           |
|          |   |         |   |   |           |          | 0.7 |           | 0.4 |           | 0.4 |           |           |
| Mamma    | C | miR-92  |   |   | -0.904329 |          | 35  | -0.098795 | 99  | -0.168048 | 27  | -0.266843 |           |
| ry gland | S | a       | - | - | 474       | Negative | 7   | 059       | 7   | 441       | 4   | 5         |           |
|          |   |         |   |   |           |          | 0.2 |           | 0.0 |           | 0.0 |           |           |
| Mamma    | C | miR-22  |   |   | -0.901730 |          | 73  | 0.550363  | 25  | -1.568919 | 68  | -1.018555 |           |
| ry gland | S | 4       | - | - | 372       | Negative | 5   | 839       | 5   | 658       | 6   | 819       |           |
|          |   |         |   |   |           |          | 0.3 |           | 0.9 |           |     |           |           |
| Mamma    | C | miR-50  |   |   | -0.875389 |          | 46  | -0.412194 | 10  | 0.034557  | 0.2 | -0.377637 |           |
| ry gland | S | 4       | - | - | 897       | Negative | 8   | 75        | 8   | 222       | 51  | 527       |           |
|          |   |         |   |   |           |          |     |           | 0.2 |           | 0.0 |           |           |
| Mamma    | C | miR-42  |   |   | -0.872391 |          | 0.5 | -0.377772 | 67  | -0.548040 | 19  | -0.925813 |           |
| ry gland | S | 3-5p    | - | - | 262       | Negative | 34  | 368       | 2   | 736       | 7   | 105       |           |
|          |   |         |   |   |           |          | 0.0 |           | 0.0 |           | 0.1 |           |           |
| Mamma    | R | miR-33  |   |   | -0.857529 |          | 32  | 0.890051  | 02  | -1.192183 | 80  | -0.302131 |           |
| ry gland | S | 8       | - | - | 839       | Negative | 8   | 533       | 8   | 391       | 8   | 858       |           |
|          |   |         |   |   |           |          | 0.0 |           | 0.0 |           | 0.3 |           |           |
| Mamma    | R | miR-36  |   |   | -0.843793 |          | 19  | 0.869530  | 03  | -1.058459 | 69  | -0.188929 |           |
| ry gland | S | 2-5p    | - | - | 222       | Negative | 3   | 068       | 1   | 731       | 3   | 662       |           |
|          |   |         |   |   |           |          |     |           | 0.0 |           | 0.0 |           |           |
| Mamma    | R | let-7a- |   |   | -0.840848 |          | 0.0 | 0.592364  | 02  | -1.088510 | 26  | -0.496145 |           |
| ry gland | S | 3p      | - | - | 652       | Negative | 86  | 749       | 9   | 17        | 5   | 421       |           |
|          |   |         |   |   |           |          | 0.3 |           |     |           | 0.1 |           |           |
| Mamma    | R | miR-13  |   |   | -0.838025 |          | 96  | 0.689659  | 0.0 | -1.446683 | 87  | -0.757023 |           |
| ry gland | S | 5a      | - | - | 018       | Negative | 4   | 879       | 13  | 126       | 4   | 247       |           |
| Mamma    | C | miR-22  |   |   | -0.833771 |          | 0.0 | -1.688055 | 0.0 | 0.951090  | 0.1 | -0.736965 |           |
| ry gland | S | 84b     | - | - | 813       | Negative | 18  | 994       | 84  | 4         | 78  | 594       |           |

|          |   |        |   |   |           |          |           |     |           |     |           |     |
|----------|---|--------|---|---|-----------|----------|-----------|-----|-----------|-----|-----------|-----|
|          |   |        |   |   |           | 7        |           | 3   |           | 6   |           |     |
|          |   |        |   |   |           | 0.0      |           | 0.0 |           | 0.8 |           |     |
| Mamma    | C | miR-50 |   |   | -0.823799 | 33       | -1.362570 | 31  | 1.476902  | 16  | 0.114332  |     |
| ry gland | S | 2b     | - | - | 491       | Negative | 6         | 079 | 3         | 755 | 1         | 675 |
|          |   |        |   |   |           |          | 0.0       | 0.0 |           | 0.2 |           |     |
| Mamma    | R | miR-14 |   |   | -0.823582 | 05       | 1.481869  | 00  | -1.741931 | 97  | -0.260062 |     |
| ry gland | S | 4      | - | - | 286       | Negative | 5         | 008 | 8         | 847 | 9         | 839 |
|          |   |        |   |   |           |          | 0.3       | 0.0 |           | 0.4 |           |     |
| Mamma    | R | miR-28 |   |   | 0.810455  | 84       | 0.538623  | 76  | -0.906890 | 67  | -0.368266 |     |
| ry gland | S | 87     | - | - | 549       | Positive | 7         | 786 | 5         | 596 | 7         | 81  |
|          |   |        |   |   |           |          | 0.6       | 0.6 |           | 0.9 |           |     |
| Mamma    | C | miR-30 |   |   | 0.810842  | 17       | -0.387023 | 30  | 0.387023  | 00  |           |     |
| ry gland | S | b-3p   | - | - | 931       | Positive | 6         | 123 | 6         | 123 | 2         | 0   |
|          |   |        |   |   |           |          | 0.1       | 0.2 |           | 0.0 |           |     |
| Mamma    | R | miR-23 |   |   | 0.811323  | 02       | -1.547487 | 78  | 0.788495  | 68  | -0.758991 |     |
| ry gland | S | 39     | - | - | 731       | Positive | 5         | 795 | 2         | 895 | 3         | 9   |
|          |   |        |   |   |           |          | 0.9       | 0.7 |           | 0.7 |           |     |
| Mamma    | R | miR-19 |   |   | 0.812221  | 65       | 0.021965  | 50  | -0.152606 | 45  | -0.130641 |     |
| ry gland | S | 6a     | - | - | 867       | Positive | 7         | 331 | 3         | 605 | 7         | 274 |
|          |   |        |   |   |           |          | 0.1       | <.0 |           | 0.0 |           |     |
| Mamma    | A | miR-24 |   |   | 0.813847  | 34       | 0.497499  | 00  | -1.497499 | 00  |           |     |
| ry gland | L | 43     | - | - | 281       | Positive | 2         | 659 | 1         | 659 | 3         | -1  |
|          |   |        |   |   |           |          | 0.3       | 0.6 |           | 0.0 |           |     |
| Mamma    | R | miR-24 |   |   | 0.821662  | 99       |           | 91  | -0.201633 | 59  | -1.201633 |     |
| ry gland | S | 19-3p  | - | - | 618       | Positive | 3         | -1  | 3         | 861 | 7         | 861 |
|          |   |        |   |   |           |          | 0.8       | 0.1 |           | 0.0 |           |     |
| Mamma    | R | miR-22 |   |   | 0.823835  | 89       | 0.064851  | 39  | -0.568283 | 11  | -0.503432 |     |
| ry gland | S | 84w    | - | - | 17        | Positive | 3         | 144 | 9         | 76  | 6         | 615 |

|          |   |        |   |   |          |          |     |           |     |           |     |           |
|----------|---|--------|---|---|----------|----------|-----|-----------|-----|-----------|-----|-----------|
| Mamma    | R | miR-18 |   |   | 0.824265 | 0.4      |     | 0.9       |     | 0.0       |     |           |
| ry gland | S | 1a     | - | - | 196      | Positive | 08  | -0.475803 | 16  | -0.048591 | 31  | -0.524394 |
|          |   |        |   |   |          |          | 9   | 575       | 4   | 264       | 5   | 839       |
| Mamma    | A | miR-12 |   |   | 0.824853 |          | 0.7 |           | 0.1 |           | 0.1 |           |
| ry gland | L | 77     | - | - | 574      | Positive | 80  | 0.169925  | 04  |           | 82  | -0.830074 |
|          |   |        |   |   |          |          | 4   | 001       | 9   | -1        | 6   | 999       |
| Mamma    | R | miR-24 |   |   | 0.825228 |          | 0.6 |           | 0.4 |           | 0.7 |           |
| ry gland | S | 87     | - | - | 942      | Positive | 20  | 0.256339  | 04  | -0.397759 | 81  | -0.141419 |
|          |   |        |   |   |          |          | 1   | 753       | 7   | 508       | 4   | 755       |
| Mamma    | C |        |   |   | 0.825761 |          | 0.3 |           |     |           | 0.6 |           |
| ry gland | S | miR-1  | - | - | 698      | Positive | 71  | -3.668947 | 0.3 | 3.435747  | 21  | -0.233199 |
|          |   |        |   |   |          |          | 7   | 171       | 79  | 994       | 3   | 176       |
| Mamma    | A | miR-19 |   |   | 0.826361 |          | 0.5 |           | 0.8 |           | 0.4 |           |
| ry gland | L | 0a     | - | - | 442      | Positive | 28  | 0.804489  | 09  | 0.185031  | 27  | 0.989521  |
|          |   |        |   |   |          |          | 5   | 588       | 3   | 894       | 7   | 482       |
| Mamma    | R | miR-12 |   |   | 0.827796 |          | 0.1 |           | 0.2 |           | 0.4 |           |
| ry gland | S | 49     | - | - | 3        | Positive | 57  | -0.730813 | 71  | 0.478047  | 60  | -0.252766 |
|          |   |        |   |   |          |          | 1   | 367       | 7   | 297       | 5   | 07        |
| Mamma    | R | miR-24 |   |   | 0.830833 |          | 0.6 |           |     |           | 0.0 |           |
| ry gland | S | 19-5p  | - | - | 541      | Positive | 27  | -0.347355 | 0.0 | -1.073063 | 04  | -1.420419 |
|          |   |        |   |   |          |          | 3   | 648       | 17  | 462       | 6   | 111       |
| Mamma    | C | miR-29 |   |   | 0.832733 |          | 0.7 |           | 0.0 |           | 0.0 |           |
| ry gland | S | 9      | - | - | 289      | Positive | 08  | 0.094636  | 86  | 0.560714  | 07  | 0.655351  |
|          |   |        |   |   |          |          | 6   | 874       | 2   | 954       | 7   | 829       |
| Mamma    | C | miR-18 |   |   | 0.835486 |          | 0.4 |           | 0.4 |           | 0.9 |           |
| ry gland | S | a      | - | - | 17       | Positive | 70  | 0.357956  | 52  | -0.364411 | 91  | -0.006455 |
|          |   |        |   |   |          |          | 1   | 404       | 6   | 426       | 4   | 022       |
| Mamma    | C | miR-37 | - | - | 0.837517 | Positive | 0.1 | 0.628780  | 0.1 | -0.580506 | 0.8 | 0.048273  |

Mammary  
Gland(Up)

|          |   |        |   |   |          |          |     |           |     |           |     |           |           |
|----------|---|--------|---|---|----------|----------|-----|-----------|-----|-----------|-----|-----------|-----------|
| ry gland | S | 4a     |   |   | 716      |          | 46  | 461       | 31  | 609       | 35  | 852       |           |
|          |   |        |   |   |          |          | 9   |           | 1   |           | 8   |           |           |
|          |   |        |   |   |          |          | 0.0 |           | <.0 |           | 0.0 |           |           |
| Mamma    | C | miR-61 |   |   | 0.837662 |          | 56  |           | 00  | -1.705256 | 04  | -0.705256 |           |
| ry gland | S | 19-3p  | - | - | 566      | Positive | 5   | 1         | 1   | 734       | 3   | 734       |           |
|          |   |        |   |   |          |          | 0.9 |           | 0.5 |           | 0.1 |           |           |
| Mamma    | C | miR-54 |   |   | 0.840007 |          | 82  |           | 37  | 0.552541  | 12  | 0.552541  |           |
| ry gland | S | 2-5p   | - | - | 105      | Positive | 8   | 0         | 4   | 023       | 8   | 023       |           |
|          |   |        |   |   |          |          | 0.7 |           |     |           | 0.2 |           |           |
| Mamma    | R | miR-15 |   |   | 0.842788 |          | 88  | -0.145940 | 0.4 | -0.326128 | 34  | -0.472068 |           |
| ry gland | S | 4c     | - | - | 343      | Positive | 3   | 361       | 69  | 083       | 8   | 444       |           |
|          |   |        |   |   |          |          | 0.1 |           |     |           | 0.0 |           |           |
| Mamma    | R | miR-87 |   |   | 0.843363 |          | 72  | -1.901221 | 0.3 | 0.911869  | 01  | -0.989352 |           |
| ry gland | S | 7      | - | - | 802      | Positive | 7   | 846       | 68  | 09        | 4   | 756       |           |
|          |   |        |   |   |          |          | 0.4 |           | 0.0 |           | 0.3 |           |           |
| Mamma    | C | miR-19 |   |   | 0.843565 |          | 33  | 0.250413  | 58  | -0.480506 | 72  | -0.230092 |           |
| ry gland | S | b      | - | - | 154      | Positive | 4   | 685       | 6   | 447       | 2   | 762       |           |
|          |   |        |   |   |          |          |     |           | 0.0 |           | 0.2 |           |           |
| Mamma    | C | miR-20 |   |   | 0.845952 |          | 0.1 | 0.735645  | 11  | -1.100679 | 24  | -0.365034 |           |
| ry gland | S | a      | - | - | 788      | Positive | 65  | 049       | 2   | 169       | 9   | 119       |           |
|          |   |        |   |   |          |          | 0.1 |           | 0.5 |           | 0.1 |           |           |
| Mamma    | C | miR-65 |   |   | 0.847021 |          | 98  | -0.669851 | 14  | 0.222392  | 99  | -0.447458 |           |
| ry gland | S | 20     | - | - | 908      | Positive | 1   | 398       | 1   | 421       | 3   | 977       |           |
|          |   |        |   |   |          |          | 0.2 |           | 0.0 |           | 0.1 |           |           |
| Mamma    | C | miR-45 |   |   | 0.853453 |          | 08  | 0.744742  | 25  | -1.345135 | 34  | -0.600392 |           |
| ry gland | S | 4      | - | - | 682      | Positive | 2   | 945       | 7   | 486       | 5   | 541       |           |
| Mamma    | A | miR-22 |   |   | 0.855384 |          | 0.0 | -1.325964 | 0.4 | 0.447692  | 0.0 | -0.878272 | Mammary   |
| ry gland | L | 85t    | - | - | 271      | Positive | 95  | 917       | 26  | 687       | 26  | 23        | Gland(Up) |

|          |   |         |   |   |          |     |           |     |           |     |           |           |
|----------|---|---------|---|---|----------|-----|-----------|-----|-----------|-----|-----------|-----------|
|          |   |         |   |   |          | 2   |           | 2   |           | 3   |           |           |
|          |   |         |   |   |          | 0.3 |           | 0.0 |           | 0.1 |           |           |
| Mamma    | C | miR-17  |   |   | 0.858428 | 93  | 0.455025  | 40  | -0.872922 | 56  | -0.417897 |           |
| ry gland | S | -5p     | - | - | 962      | 4   | 349       | 1   | 502       | 7   | 153       |           |
|          |   |         |   |   |          |     |           |     | 0.0       |     | 0.0       |           |
| Mamma    | C | let-7a- |   |   | 0.862651 | 0.0 | 0.592364  | 02  | -1.088510 | 26  | -0.496145 |           |
| ry gland | S | 3p      | - | - | 509      | 86  | 749       | 9   | 17        | 5   | 421       |           |
|          |   |         |   |   |          | 0.4 |           | 0.2 |           |     | 0.5       |           |
| Mamma    | C | miR-22  |   |   | 0.862954 | 65  | 0.299560  | 39  | -0.547487 | 19  | -0.247927 |           |
| ry gland | S | 85o     | - | - | 899      | 1   | 282       | 5   | 795       | 7   | 513       |           |
|          |   |         |   |   |          | 0.5 |           | 0.8 |           |     | 0.4       |           |
| Mamma    | C | miR-19  |   |   | 0.866018 | 28  | 0.804489  | 09  | 0.185031  | 27  | 0.989521  | Mammary   |
| ry gland | S | 0a      | - | - | 531      | 5   | 588       | 3   | 894       | 7   | 482       | Gland(Up) |
|          |   |         |   |   |          | 0.1 |           | 0.0 |           |     | 0.2       |           |
| Mamma    | C | miR-37  |   |   | 0.869627 | 18  | 0.516556  | 28  | -0.707292 | 09  | -0.190736 |           |
| ry gland | S | 4b      | - | - | 464      | 8   | 259       | 4   | 666       | 4   | 407       |           |
|          |   |         |   |   |          | 0.4 |           | 0.9 |           |     | 0.4       |           |
| Mamma    | R | miR-22  |   |   | 0.869888 | 36  | -0.459431 | 25  |           | 46  | -0.459431 |           |
| ry gland | S | 85s     | - | - | 09       | 3   | 619       | 1   | 0         | 6   | 619       |           |
|          |   |         |   |   |          | 0.0 |           | 0.0 |           |     | 0.0       |           |
| Mamma    | C | miR-42  |   |   | 0.871427 | 64  | 1.010327  | 00  | -1.686638 | 16  | -0.676310 |           |
| ry gland | S | 9       | - | - | 343      | 1   | 657       | 2   | 222       | 2   | 565       |           |
|          |   |         |   |   |          | 0.4 |           | 0.1 |           |     | 0.5       |           |
| Mamma    | A | miR-13  |   |   | 0.872590 | 08  | -0.468725 | 12  | 0.819137  | 08  | 0.350411  |           |
| ry gland | L | 88-5p   | - | - | 801      | 8   | 37        | 8   | 152       | 8   | 782       |           |
|          |   |         |   |   |          | 0.3 |           | 0.9 |           |     | 0.0       |           |
| Mamma    | R |         |   |   | 0.874157 | 28  | -0.481822 | 72  | 0.013234  | 35  | -0.468587 | Mammary   |
| ry gland | S | let-7c  | - | - | 965      | 3   | 244       | 5   | 807       | 8   | 437       | Gland(Up) |

|          |   |        |   |   |          |          |     |           |     |           |     |           |             |  |
|----------|---|--------|---|---|----------|----------|-----|-----------|-----|-----------|-----|-----------|-------------|--|
| Mamma    | C | miR-12 |   |   | 0.878245 | 0.7      |     |           |     | 0.0       |     |           |             |  |
| ry gland | S | 96     | - | - | 831      | Positive | 84  | -0.099535 | 0.0 | -0.736965 | 10  | -0.836501 |             |  |
|          |   |        |   |   |          |          | 7   | 674       | 17  | 594       | 9   | 268       |             |  |
|          |   |        |   |   |          |          | 0.4 |           | 0.0 |           | 0.4 |           |             |  |
| Mamma    | A | miR-13 |   |   | 0.879883 |          | 25  | 0.397115  | 72  | -0.729823 | 12  | -0.332707 |             |  |
| ry gland | L | 88-3p  | - | - | 04       | Positive | 6   | 591       | 2   | 525       | 3   | 934       |             |  |
|          |   |        |   |   |          |          | 0.2 |           | 0.9 |           | 0.0 |           |             |  |
| Mamma    | R |        |   |   | 0.885115 |          | 54  | -0.354780 | 42  | -0.018479 | 14  | -0.373260 |             |  |
| ry gland | S | let-7i | - | - | 02       | Positive | 6   | 371       | 8   | 857       | 1   | 228       |             |  |
|          |   |        |   |   |          |          | 0.3 |           | 0.0 |           | 0.1 |           |             |  |
| Mamma    | C | miR-26 |   |   | 0.885697 |          | 68  | 0.365365  | 36  | -0.720613 | 28  | -0.355248 |             |  |
| ry gland | S | a      | - | - | 877      | Positive | 4   | 871       | 9   | 955       | 8   | 085       |             |  |
|          |   |        |   |   |          |          | 0.8 |           | 0.7 |           | 0.8 |           |             |  |
| Mamma    | C | miR-20 |   |   | 0.890690 |          | 28  | 0.106515  | 31  | -0.150959 | 53  | -0.044443 | Mammary     |  |
| ry gland | S | 0c     | - | - | 74       | Positive | 7   | 234       | 4   | 026       | 2   | 792       | Gland(Up)   |  |
|          |   |        |   |   |          |          | 0.9 |           | 0.6 |           |     |           |             |  |
| Mamma    | C | miR-14 |   |   | 0.911311 |          | 31  | -0.046824 | 89  | 0.187025  | 0.6 | 0.140201  | Mammary     |  |
| ry gland | S | 6a     | - | - | 087      | Positive | 3   | 712       | 5   | 774       | 97  | 063       | Gland(Down) |  |
|          |   |        |   |   |          |          | 0.0 |           |     |           | 0.0 |           |             |  |
| Mamma    | C |        |   |   | 0.919813 |          | 74  | 0.722466  | 0.0 | -1.137503 | 90  | -0.415037 |             |  |
| ry gland | S | miR-24 | - | - | 858      | Positive | 1   | 024       | 01  | 524       | 2   | 499       |             |  |
|          |   |        |   |   |          |          | 0.0 |           | 0.0 |           | 0.1 |           |             |  |
| Mamma    | C | miR-12 |   |   | 0.920598 |          | 59  | 0.985862  | 00  | -1.454957 | 40  | -0.469095 |             |  |
| ry gland | S | 6-3p   | - | - | 227      | Positive | 5   | 336       | 3   | 808       | 7   | 471       |             |  |
|          |   |        |   |   |          |          | 0.4 |           |     |           | 0.2 |           |             |  |
| Mamma    | C | miR-36 |   |   | 0.937044 |          | 51  | 0.326134  | 0.0 | -0.625628 | 01  | -0.299494 |             |  |
| ry gland | S | 1      | - | - | 652      | Positive | 3   | 206       | 9   | 861       | 6   | 656       |             |  |
| Mamma    | C | miR-15 | - | - | 0.945404 | Positive | 0.7 | -0.180572 | 0.6 | -0.197939 | 0.3 | -0.378511 |             |  |



|          |   |        |         |   |          |          |     |           |     |           |     |           |               |
|----------|---|--------|---------|---|----------|----------|-----|-----------|-----|-----------|-----|-----------|---------------|
| ry gland | S | 4b     |         |   | 38       |          | 93  | 246       | 78  | 378       | 88  | 623       |               |
|          |   |        |         |   |          |          | 1   |           | 7   |           | 9   |           |               |
|          |   |        |         |   |          |          | 0.2 |           | 0.3 |           |     |           |               |
| Mamma    | R | miR-38 |         |   | 0.946233 |          | 31  | -0.328180 | 29  | 0.254030  | 0.7 | -0.074149 |               |
| ry gland | S | 1      | -       | - | 339      | Positive | 2   | 627       | 5   | 86        | 69  | 767       |               |
|          |   |        |         |   |          |          | 0.9 |           | 0.4 |           | 0.3 |           |               |
| Mamma    | C | miR-50 |         |   | 0.946462 |          | 79  |           | 66  | -0.530514 | 63  | -0.530514 |               |
| ry gland | S | 3-3p   | -       | - | 88       | Positive | 8   | 0         | 9   | 717       | 9   | 717       |               |
|          |   |        |         |   |          |          | 0.2 |           | 0.0 |           | 0.1 |           |               |
| Mamma    | C | miR-19 |         |   | 0.949207 |          | 25  | 0.508485  | 07  | -0.923142 | 90  | -0.414656 |               |
| ry gland | S | a      | -       | - | 697      | Positive | 8   | 843       | 4   | 03        | 8   | 187       |               |
|          |   |        |         |   |          |          | 0.1 |           | 0.0 |           |     |           |               |
| Mamma    | C | miR-37 |         |   | 0.966833 |          | 01  | 0.790546  | 40  | -0.919829 | 0.6 | -0.129283 |               |
| ry gland | S | 6e     | -       | - | 127      | Positive | 8   | 634       | 4   | 651       | 63  | 017       |               |
|          |   |        |         |   |          |          | 0.0 |           | <.0 |           | 0.0 |           |               |
| Mamma    | C | miR-10 |         |   | 0.983521 |          | 51  | 0.997729  | 00  | -1.740137 | 13  | -0.742408 |               |
| ry gland | S | 6b     | -       | - | 504      | Positive | 6   | 826       | 1   | 848       | 6   | 021       |               |
|          |   |        |         |   |          |          | 0.7 |           | 0.0 |           | 0.0 |           |               |
| Mamma    | R |        |         |   | 0.905704 |          | 27  | 0.132979  | 17  | -0.715373 | 09  | -0.582393 |               |
| ry gland | S | let-7e | -       |   | 885      | Positive | 3   | 992       | 7   | 837       | 1   | 845       |               |
|          |   |        |         |   |          |          | 0.9 |           |     |           | 0.7 |           | Mammary       |
| Mamma    | R | miR-12 | 0.88884 |   |          |          | 98  |           | 0.8 | 0.383328  | 65  | 0.383328  | gland(Specifi |
| ry gland | S | 98     | 1871    | - | -        | Positive | 2   | 0         | 02  | 64        | 4   | 64        | c)            |
|          |   |        |         |   |          |          | 0.8 |           | 0.4 |           | 0.3 |           |               |
| Mamma    | R | miR-24 |         |   | 0.866328 |          | 17  | -0.095577 | 90  | 0.331205  | 53  | 0.235628  |               |
| ry gland | S | 11-5p  | -       |   | 523      | Positive | 9   | 66        | 6   | 908       | 9   | 248       |               |
| Mamma    | R | miR-24 |         |   | 0.810006 |          | 0.6 | 0.258160  | 0.0 | -1.225352 | 0.0 | -0.967191 |               |
| ry gland | S | 78     | -       |   | 097      | Positive | 19  | 865       | 03  | 471       | 12  | 607       |               |

|          |   |        |         |          |   |     |           |     |           |     |           |
|----------|---|--------|---------|----------|---|-----|-----------|-----|-----------|-----|-----------|
|          |   |        |         |          |   | 5   |           | 3   |           | 9   |           |
|          |   |        |         |          |   | 0.6 |           | 0.2 |           |     |           |
| Mamma    | R | miR-37 |         | 0.846831 |   | 07  | -0.172688 | 98  | -0.332095 | 0.0 | -0.504784 |
| ry gland | S | 5      | -       | 164      | - | 3   | 424       | 1   | 854       | 93  | 278       |
|          |   |        |         |          |   | 0.4 |           | 0.0 |           | 0.4 |           |
| Mamma    | C | miR-13 |         | 0.815193 |   | 25  | 0.397115  | 72  | -0.729823 | 12  | -0.332707 |
| ry gland | S | 88-3p  | -       | 271      | - | 6   | 591       | 2   | 525       | 3   | 934       |
|          |   |        |         |          |   |     |           | 0.0 |           | 0.0 |           |
| Mamma    | C | miR-15 | 0.84051 |          |   | 0.2 | 0.334938  | 00  | -1.032309 | 01  | -0.697370 |
| ry gland | S | b      | 8415    | -        | - | 56  | 96        | 4   | 766       | 2   | 806       |
|          |   |        |         |          |   |     |           | 0.0 |           | 0.0 |           |
| Mamma    | C | miR-17 |         | 0.908967 |   | 0.3 | 0.316672  | 00  | -0.973527 | 08  | -0.656855 |
| ry gland | S | -3p    | -       | 803      | - | 71  | 369       | 5   | 789       | 4   | 419       |
|          |   |        |         |          |   | 0.6 |           | 0.2 |           | 0.4 |           |
| Mamma    | C | miR-22 |         | 0.836621 |   | 75  | 0.241008  | 20  | -0.504042 | 84  | -0.263034 |
| ry gland | S | 85c    | -       | 997      | - | 2   | 1         | 8   | 505       | 4   | 406       |
|          |   |        |         |          |   | 0.3 |           | 0.7 |           | 0.4 |           |
| Mamma    | C | miR-23 | 0.89156 |          |   | 90  | -0.447458 | 47  | 0.206450  | 95  | -0.241008 |
| ry gland | S | 16     | 7818    | -        | - | 6   | 977       | 9   | 877       | 2   | 1         |
|          |   |        |         |          |   | 0.8 |           | 0.0 |           | 0.0 |           |
| Mamma    | C | miR-36 | 0.85824 |          |   | 50  | 0.097297  | 31  | -0.975833 | 01  | -0.878536 |
| ry gland | S | 3      | 7111    | -        | - | 9   | 201       | 9   | 689       | 8   | 488       |
|          |   |        |         |          |   | 0.0 |           | <.0 |           | 0.0 |           |
| Mamma    | C | miR-48 | 0.89359 |          |   | 33  | 0.684686  | 00  | -1.309141 | 02  | -0.624455 |
| ry gland | S | 4      | 0218    | -        | - | 3   | 75        | 1   | 94        | 5   | 19        |
|          |   |        |         |          |   | 0.6 |           | 0.9 |           | 0.4 |           |
| Mamma    | A | miR-10 |         | 0.974881 |   | 87  | -0.129064 | 71  | -0.009405 | 51  | -0.138469 |
| ry gland | L | 1      | -       | 971      | - | 4   | 275       | 2   | 395       | 2   | 67        |

|          |   |        |         |          |   |          |     |           |     |           |     |           |
|----------|---|--------|---------|----------|---|----------|-----|-----------|-----|-----------|-----|-----------|
| Mamma    | A | miR-12 | 0.88832 | 0.937224 |   |          | 0.2 |           | 0.7 |           | 0.1 |           |
| ry gland | L | 47-5p  | 9363    | 327      | - | Positive | 47  |           | 17  | 0.293731  | 81  | -0.706268 |
|          |   |        |         |          |   |          | 2   | -1        | 2   | 203       | 3   | 797       |
| Mamma    | A | miR-12 |         | 0.878621 |   |          | 0.7 |           |     |           | 0.0 |           |
| ry gland | L | 96     | -       | 954      | - | Positive | 84  | -0.099535 | 0.0 | -0.736965 | 10  | -0.836501 |
|          |   |        |         |          |   |          | 7   | 674       | 17  | 594       | 9   | 268       |
| Mamma    | A | miR-13 | 0.86493 | 0.897954 |   |          | 0.7 |           | 0.2 |           | 0.0 |           |
| ry gland | L | 06     | 053     | 729      | - | Positive | 26  | -0.171766 | 43  | -0.451379 | 09  | -0.623145 |
|          |   |        |         |          |   |          | 7   | 348       | 3   | 346       | 4   | 695       |
| Mamma    | A | miR-14 |         | 0.886361 |   |          | 0.3 |           |     |           | 0.0 |           |
| ry gland | L | 68     | -       | 706      | - | Positive | 95  | -0.650200 | 0.9 | -0.009209 | 07  | -0.659410 |
|          |   |        |         |          |   |          | 3   | 437       | 88  | 718       | 9   | 156       |
| Mamma    | A | miR-14 | 0.84513 | 0.857176 |   |          | 0.1 |           | 0.0 |           | 0.2 |           |
| ry gland | L | 8a     | 6126    | 74       | - | Positive | 55  | -0.352848 | 49  | 0.519884  | 36  | 0.167035  |
|          |   |        |         |          |   |          | 4   | 857       | 1   | 027       | 8   | 171       |
| Mamma    | A | miR-15 | 0.89494 |          |   |          | 0.9 |           |     |           | 0.0 |           |
| ry gland | L | 0      | 6955    | -        | - | Positive | 72  | -0.020157 | 0.0 | -1.125232 | 08  | -1.145390 |
|          |   |        |         |          |   |          | 1   | 744       | 24  | 971       | 4   | 714       |
| Mamma    | A | miR-16 |         | 0.835238 |   |          | 0.1 |           | 0.0 |           |     |           |
| ry gland | L | b      | -       | 43       | - | Positive | 05  | 0.669139  | 04  | -1.098308 | 0.0 | -0.429168 |
|          |   |        |         |          |   |          | 7   | 854       | 1   | 7         | 27  | 846       |
| Mamma    | A | miR-18 | 0.81701 | 0.916627 |   |          | 0.4 |           | 0.9 |           | 0.0 |           |
| ry gland | L | 1a     | 8451    | 147      | - | Positive | 08  | -0.475803 | 16  | -0.048591 | 31  | -0.524394 |
|          |   |        |         |          |   |          | 9   | 575       | 4   | 264       | 5   | 839       |
| Mamma    | A | miR-18 |         | 0.942521 |   |          | 0.2 |           | 0.7 |           | 0.0 |           |
| ry gland | L | 1b     | -       | 794      | - | Positive | 89  | -0.846788 | 72  | 0.180701  | 18  | -0.666087 |
|          |   |        |         |          |   |          | 9   | 872       | 7   | 738       | 5   | 134       |
| Mamma    | A | miR-19 | 0.99146 | 0.906234 | - | Positive | 0.9 | 0.021965  | 0.7 | -0.152606 | 0.7 | -0.130641 |

|          |   |        |         |          |   |          |     |           |     |           |     |           |               |
|----------|---|--------|---------|----------|---|----------|-----|-----------|-----|-----------|-----|-----------|---------------|
| ry gland | L | 6a     | 3631    | 743      |   |          | 65  | 331       | 50  | 605       | 45  | 274       |               |
|          |   |        |         |          |   |          | 7   |           | 3   |           | 7   |           |               |
|          |   |        |         |          |   |          | 0.9 |           | 0.8 |           | 0.9 |           | Mammary       |
| Mamma    | A | miR-19 | 0.90312 |          |   |          | 14  | -0.059172 | 54  | 0.087323  | 43  | 0.028151  | gland(Specifi |
| ry gland | L | 6b     | 9456    | -        | - | Positive | 9   | 444       | 9   | 484       | 5   | 04        | c)            |
|          |   |        |         |          |   |          | 0.2 |           |     |           | 0.0 |           |               |
| Mamma    | A | miR-20 | 0.81230 | 0.914095 |   |          | 76  | -0.659488 | 0.9 | -0.023327 | 86  | -0.682816 |               |
| ry gland | L | 5      | 4593    | 54       | - | Positive | 3   | 929       | 64  | 576       | 6   | 505       |               |
|          |   |        |         |          |   |          | 0.3 |           | 0.6 |           | 0.0 |           |               |
| Mamma    | A | miR-21 |         | 0.855113 |   |          | 12  | -0.385772 | 15  | -0.140725 | 10  | -0.526497 |               |
| ry gland | L | 0      | -       | 971      | - | Positive | 7   | 905       | 3   | 025       | 1   | 93        |               |
|          |   |        |         |          |   |          |     |           | 0.0 |           | 0.0 |           |               |
| Mamma    | A | miR-22 |         | 0.854600 |   |          | 0.5 | -0.241098 | 63  | -0.608988 | 08  | -0.850087 |               |
| ry gland | L | 2      | -       | 497      | - | Positive | 36  | 616       | 3   | 775       | 9   | 391       |               |
|          |   |        |         |          |   |          | 0.1 |           |     |           | 0.1 |           |               |
| Mamma    | A | miR-22 | 0.89849 | 0.984410 |   |          | 55  | -0.662965 | 0.9 |           | 37  | -0.662965 |               |
| ry gland | L | 84k    | 4917    | 359      | - | Positive | 9   | 013       | 66  | 0         | 5   | 013       |               |
|          |   |        |         |          |   |          | 0.2 |           | 0.0 |           |     |           |               |
| Mamma    | A | miR-22 |         | 0.983911 |   |          | 54  | 0.716207  | 10  | -1.321928 |     | -0.605721 |               |
| ry gland | L | 84n    | -       | 273      | - | Positive | 3   | 034       | 7   | 095       | 0.1 | 061       |               |
|          |   |        |         |          |   |          | 0.8 |           | 0.1 |           | 0.0 |           |               |
| Mamma    | A | miR-22 | 0.84918 | 0.829965 |   |          | 89  | 0.064851  | 39  | -0.568283 | 11  | -0.503432 |               |
| ry gland | L | 84w    | 4661    | 361      | - | Positive | 3   | 144       | 9   | 76        | 6   | 615       |               |
|          |   |        |         |          |   |          | 0.1 |           | 0.2 |           | 0.1 |           |               |
| Mamma    | A | miR-22 | 0.90651 | 0.915377 |   |          | 22  | -0.888042 | 03  | 0.656290  | 36  | -0.231751 |               |
| ry gland | L | 84x    | 2288    | 525      | - | Positive | 3   | 166       | 7   | 539       | 9   | 627       |               |
| Mamma    | A | miR-22 |         | 0.814563 |   |          | 0.1 | -0.699295 | 0.6 | 0.164781  | 0.0 | -0.534513 |               |
| ry gland | L | 84y    | -       | 556      | - | Positive | 56  | 176       | 73  | 698       | 09  | 478       |               |

|          |   |        |          |     |   |          |     |           |     |           |     |           |
|----------|---|--------|----------|-----|---|----------|-----|-----------|-----|-----------|-----|-----------|
|          |   |        |          |     |   |          | 6   | 6         | 6   |           |     |           |
|          |   |        |          |     |   |          | 0.4 | 0.7       | 0.5 |           |     |           |
| Mamma    | A | miR-23 | 0.89006  |     |   |          | 94  | -0.637429 | 56  | 0.222392  | 54  | -0.415037 |
| ry gland | L | 13-3p  | 282      | -   | - | Positive | 8   | 921       | 4   | 421       | 6   | 499       |
|          |   |        |          |     |   |          | 0.2 | 0.5       | 0.0 |           |     |           |
| Mamma    | A | miR-23 | 0.927052 |     |   |          | 84  | -1.520832 | 06  | 0.722466  | 49  | -0.798366 |
| ry gland | L | 32     | -        | 826 | - | Positive | 9   | 163       | 1   | 024       | 6   | 139       |
|          |   |        |          |     |   |          | 0.1 | 0.2       | 0.0 |           |     |           |
| Mamma    | A | miR-23 | 0.827939 |     |   |          | 02  | -1.547487 | 78  | 0.788495  | 68  | -0.758991 |
| ry gland | L | 39     | -        | 239 | - | Positive | 5   | 795       | 2   | 895       | 3   | 9         |
|          |   |        |          |     |   |          |     |           | 0.3 |           | 0.1 |           |
| Mamma    | A |        | 0.902499 |     |   |          | 0.1 | -0.348422 | 35  | 0.174909  | 65  | -0.173513 |
| ry gland | L | miR-25 | -        | 792 | - | Positive | 19  | 999       | 6   | 437       | 5   | 562       |
|          |   |        |          |     |   |          | 0.0 | 0.0       | 0.0 |           |     |           |
| Mamma    | A | miR-27 | 0.921262 |     |   |          | 19  | 0.423176  | 00  | -0.690582 | 25  | -0.267406 |
| ry gland | L | b      | -        | 387 | - | Positive | 1   | 047       | 1   | 722       | 4   | 675       |
|          |   |        |          |     |   |          | 0.1 | 0.3       | 0.0 |           |     |           |
| Mamma    | A | miR-29 | 0.87217  |     |   |          | 42  | -1.006426 | 92  | 0.465053  | 26  | -0.541373 |
| ry gland | L | 6      | 731      | -   | - | Positive | 4   | 269       | 9   | 037       | 4   | 232       |
|          |   |        |          |     |   |          | 0.5 | 0.0       | 0.1 |           |     |           |
| Mamma    | A |        | 0.93494  |     |   |          | 82  | 0.293692  | 20  | -0.813302 | 49  | -0.519610 |
| ry gland | L | miR-31 | 2573     | -   | - | Positive | 5   | 678       | 2   | 897       | 7   | 219       |
|          |   |        |          |     |   |          | 0.4 | 0.6       | 0.0 |           |     |           |
| Mamma    | A | miR-32 | 0.837440 |     |   |          | 59  | -0.351069 | 77  | -0.155479 | 18  | -0.506548 |
| ry gland | L | 0a     | -        | 709 | - | Positive | 2   | 768       | 5   | 138       | 6   | 906       |
|          |   |        |          |     |   |          | 0.3 | 0.2       | 0.0 |           |     |           |
| Mamma    | A | miR-32 | 0.948885 |     |   |          | 06  | -0.430634 | 16  | -0.358686 | 05  | -0.789320 |
| ry gland | L | 8      | -        | 107 | - | Positive | 2   | 354       | 3   | 645       | 2   | 999       |



|          |   |        |         |           |     |          |  |     |           |     |           |     |           |
|----------|---|--------|---------|-----------|-----|----------|--|-----|-----------|-----|-----------|-----|-----------|
| ry gland | L | 20     |         |           | 227 |          |  | 98  | 398       | 14  | 421       | 99  | 977       |
|          |   |        |         |           |     |          |  | 1   |           | 1   |           | 3   |           |
|          |   |        |         |           |     |          |  | 0.2 |           | 0.6 |           | 0.0 |           |
| Mamma    | A | miR-74 | 0.87217 |           |     |          |  | 41  | -0.703606 | 47  | -0.195015 | 32  | -0.898622 |
| ry gland | L | 4      | 6912    | -         | -   | Positive |  | 9   | 997       | 2   | 982       | 3   | 98        |
|          |   |        |         |           |     |          |  | 0.4 |           | 0.6 |           | 0.1 |           |
| Mamma    | A | miR-76 |         | 0.925622  |     |          |  | 80  | -0.177573 | 22  | -0.105127 | 54  | -0.282701 |
| ry gland | L | 9      | -       | 888       | -   | Positive |  | 8   | 917       | 3   | 522       | 2   | 439       |
|          |   |        |         |           |     |          |  | 0.3 |           | 0.0 |           | 0.1 |           |
| Mamma    | A | miR-92 | 0.87103 | 0.819980  |     |          |  | 00  | 0.250512  | 03  | -0.593486 | 22  | -0.342974 |
| ry gland | L | b      | 7404    | 196       | -   | Positive |  | 3   | 486       | 7   | 573       | 7   | 087       |
|          |   |        |         |           |     |          |  | 0.6 |           | 0.5 |           | 0.0 |           |
| Mamma    | A |        | 0.95375 | 0.850683  |     |          |  | 15  | -0.353636 | 88  | -0.309328 | 62  | -0.662965 |
| ry gland | L | miR-95 | 7175    | 187       | -   | Positive |  | 8   | 955       | 1   | 058       | 9   | 013       |
|          |   |        |         |           |     |          |  | 0.3 |           | 0.4 |           | 0.8 |           |
| Mamma    | A | miR-9- | 0.91183 | 0.839179  |     |          |  | 95  | -0.826668 | 29  | 0.721698  | 49  | -0.104969 |
| ry gland | L | 5p     | 9926    | 592       | -   | Positive |  | 4   | 397       | 9   | 838       | 3   | 56        |
|          |   |        |         |           |     |          |  | 0.6 |           | 0.8 |           | 0.2 |           |
| Mamma    | A | miR-99 |         | 0.865219  |     |          |  | 56  | -0.164786 | 13  | -0.070328 | 68  | -0.235114 |
| ry gland | L | a-3p   | -       | 426       | -   | Positive |  | 7   | 278       | 9   | 042       | 8   | 32        |
|          |   |        |         |           |     |          |  |     |           | 0.2 |           | 0.0 |           |
| Mamma    | R | miR-12 |         | -0.821070 |     |          |  | 0.9 | -0.019658 | 72  | 0.584484  | 14  | 0.564825  |
| ry gland | S | 7      | -       | 122       | -   | Negative |  | 64  | 431       | 7   | 329       | 5   | 899       |
|          |   |        |         |           |     |          |  | 0.2 |           |     |           | 0.4 |           |
| Mamma    | R | miR-12 |         | -0.849925 |     |          |  | 17  | -1.165490 | 0.1 | 1.764469  | 40  | 0.598979  |
| ry gland | S | 71     | -       | 525       | -   | Negative |  | 3   | 03        | 06  | 109       | 5   | 079       |
| Mamma    | R | miR-14 |         | -0.853224 |     |          |  | 0.6 | -0.193217 | 0.1 | 0.591910  | 0.2 | 0.398693  |
| ry gland | S | 8b     | -       | 048       | -   | Negative |  | 32  | 323       | 12  | 797       | 51  | 474       |

|          |   |        |           |           |   |          |     |           |     |           |     |           |
|----------|---|--------|-----------|-----------|---|----------|-----|-----------|-----|-----------|-----|-----------|
|          |   |        |           |           |   |          | 2   |           | 1   |           | 8   |           |
|          |   |        |           |           |   |          |     |           | 0.0 |           | 0.0 |           |
| Mamma    | R | miR-15 | -0.8560   |           |   |          | 0.2 | 0.334938  | 00  | -1.032309 | 01  | -0.697370 |
| ry gland | S | b      | 55826     | -         | - | Negative | 56  | 96        | 4   | 766       | 2   | 806       |
|          |   |        |           |           |   |          | 0.5 |           | 0.1 |           | 0.3 |           |
| Mamma    | R | miR-18 | -0.810880 |           |   |          | 98  | -0.578125 | 73  | 1.715305  | 60  | 1.137180  |
| ry gland | S | 3      | -         | 756       | - | Negative | 9   | 071       | 3   | 519       | 2   | 448       |
|          |   |        |           |           |   |          | 0.4 |           | 0.4 |           | 0.9 |           |
| Mamma    | R | miR-18 | -0.838470 |           |   |          | 70  | 0.357956  | 52  | -0.364411 | 91  | -0.006455 |
| ry gland | S | a      | -         | 924       | - | Negative | 1   | 404       | 6   | 426       | 4   | 022       |
|          |   |        |           |           |   |          |     |           | 0.5 |           | 0.3 |           |
| Mamma    | R | miR-19 | -0.913615 |           |   |          | 0.8 | 0.074002  | 99  | 0.272778  | 06  | 0.346780  |
| ry gland | S | 1      | -         | 749       | - | Negative | 92  | 561       | 2   | 268       | 8   | 828       |
|          |   |        |           |           |   |          |     |           | 0.1 |           | 0.5 |           |
| Mamma    | R | miR-19 | -0.9303   | -0.969122 |   |          | 0.0 | 0.223469  | 88  | -0.159565 | 61  | 0.063904  |
| ry gland | S | 2      | 53353     | 217       | - | Negative | 98  | 962       | 2   | 951       | 2   | 012       |
|          |   |        |           |           |   |          | 0.6 |           | 0.2 |           | 0.5 |           |
| Mamma    | R | miR-21 | -0.934168 |           |   |          | 87  | -0.285043 | 05  | 0.714155  | 73  | 0.429112  |
| ry gland | S | -3p    | -         | 356       | - | Negative | 3   | 027       | 7   | 711       | 2   | 684       |
|          |   |        |           |           |   |          | 0.3 |           | 0.2 |           | 0.3 |           |
| Mamma    | R | miR-22 | -0.874544 |           |   |          | 70  | -0.363470 | 47  | 0.529348  | 63  | 0.165878  |
| ry gland | S | 85k    | -         | 796       | - | Negative | 2   | 357       | 2   | 526       | 8   | 168       |
|          |   |        |           |           |   |          | 0.4 |           | 0.7 |           | 0.5 |           |
| Mamma    | R | miR-23 | -0.859431 |           |   |          | 94  | -0.637429 | 56  | 0.222392  | 54  | -0.415037 |
| ry gland | S | 13-3p  | -         | 057       | - | Negative | 8   | 921       | 4   | 421       | 6   | 499       |
|          |   |        |           |           |   |          | 0.1 |           | 0.0 |           | 0.0 |           |
| Mamma    | R | miR-29 | -0.8426   | -0.841986 |   |          | 51  | 0.876425  | 00  | -1.465292 | 94  | -0.588866 |
| ry gland | S | d      | 76149     | 008       | - | Negative | 8   | 315       | 4   | 27        | 6   | 955       |



|          |   |        |         |           |   |          |     |           |     |           |     |           |               |    |
|----------|---|--------|---------|-----------|---|----------|-----|-----------|-----|-----------|-----|-----------|---------------|----|
| Mamma    | R | miR-41 | -0.9005 | -0.831536 |   |          | 0.2 |           | 0.7 |           | 0.1 |           |               |    |
| ry gland | S | 1c-3p  | 32844   | 311       | - | Negative | 79  | 0.757143  | 94  | 0.149747  | 56  | 0.906890  |               |    |
|          |   |        |         |           |   |          | 7   | 476       | 7   | 12        | 8   | 596       |               |    |
| Mamma    | R | miR-44 | -0.8835 |           |   |          | 0.2 |           | 0.3 |           |     |           |               |    |
| ry gland | S | 9a     | 65605   | -         | - | Negative | 27  | -0.369233 | 20  | 0.369233  | 0.9 |           |               |    |
|          |   |        |         |           |   |          | 4   | 81        | 4   | 81        | 38  | 0         |               |    |
| Mamma    | R | miR-87 |         | -0.816597 |   |          | 0.9 |           | 0.7 |           | 0.1 |           |               |    |
| ry gland | S | 4      | -       | 489       | - | Negative | 87  | -0.008878 | 22  | 0.209176  | 14  | 0.200298  |               |    |
|          |   |        |         |           |   |          | 3   | 151       | 4   | 802       | 4   | 65        |               |    |
| Mamma    | R |        |         | -0.893378 |   |          | 0.0 |           |     |           |     |           |               |    |
| ry gland | S | miR-96 | -       | 412       | - | Negative | 86  | 0.878364  | 0.0 | -1.409327 | 0.0 | -0.530963 | Mammary       |    |
|          |   |        |         |           |   |          | 6   | 348       | 01  | 839       | 79  | 49        | Gland(Up)     |    |
| Mamma    | R | miR-99 |         | -0.929175 |   |          | 0.8 |           | 0.5 |           |     |           |               |    |
| ry gland | S | a-5p   | -       | 073       | - | Negative | 51  | -0.132228 | 45  | 0.437150  | 0.5 | 0.304921  | Mammary       |    |
|          |   |        |         |           |   |          | 4   | 905       | 9   | 101       | 5   | 196       | Gland(Up)     |    |
| Mamma    | C |        | -0.8145 | -0.828583 |   |          |     |           | 0.1 |           | 0.0 |           |               |    |
| ry gland | S | let-7b | 85517   | 347       | - | Negative | 0.8 | -0.061446 | 13  | -0.420345 | 33  | -0.481792 |               |    |
|          |   |        |         |           |   |          | 6   | 624       | 7   | 663       | 4   | 287       |               |    |
| Mamma    | C |        |         | -0.851422 |   |          | 0.3 |           | 0.9 |           | 0.0 |           |               |    |
| ry gland | S | let-7c | -       | 284       | - | Negative | 28  | -0.481822 | 72  | 0.013234  | 35  | -0.468587 | Mammary       |    |
|          |   |        |         |           |   |          | 3   | 244       | 5   | 807       | 8   | 437       | Gland(Up)     |    |
| Mamma    | C | miR-12 | -0.9745 |           |   |          | 0.9 |           |     |           | 0.7 |           |               |    |
| ry gland | S | 98     | 00864   | -         | - | Negative | 98  |           | 0.8 | 0.383328  | 65  | 0.383328  | Mammary       |    |
|          |   |        |         |           |   |          | 2   | 0         | 02  | 64        | 4   | 64        | gland(Specifi | c) |
| Mamma    | C | miR-13 | -0.8501 |           |   |          | 0.8 |           | 0.3 |           | 0.3 |           |               |    |
| ry gland | S | 2      | 09916   | -         | - | Negative | 01  | 0.107484  | 72  | -0.364340 | 44  | -0.256855 |               |    |
|          |   |        |         |           |   |          | 8   | 427       | 9   | 258       | 1   | 831       |               |    |
| Mamma    | C | miR-14 | -0.8699 | -         | - | Negative | 0.3 | -0.281598 | 0.9 | -0.018264 | 0.1 | -0.299862 |               |    |

|          |   |        |         |   |   |          |     |           |     |           |     |           |
|----------|---|--------|---------|---|---|----------|-----|-----------|-----|-----------|-----|-----------|
| ry gland | S | 0      | 21215   |   |   |          | 70  | 156       | 44  | 234       | 92  | 39        |
|          |   |        |         |   |   |          | 9   |           | 6   |           | 5   |           |
|          |   |        |         |   |   |          | 0.5 |           |     |           | 0.0 |           |
| Mamma    | C | miR-14 | -0.8586 |   |   |          | 50  | -0.394717 | 0.2 | -0.600229 | 21  | -0.994946 |
| ry gland | S | 9-5p   | 95374   | - | - | Negative | 2   | 515       | 31  | 257       | 5   | 772       |
|          |   |        |         |   |   |          | 0.8 |           | 0.0 |           | 0.0 |           |
| Mamma    | C | miR-18 | -0.8273 |   |   |          | 94  | 0.048363  | 21  | -0.769387 | 21  | -0.721024 |
| ry gland | S | 8      | 55142   | - | - | Negative | 8   | 022       | 3   | 072       | 2   | 05        |
|          |   |        |         |   |   |          | 0.7 |           | 0.8 |           | 0.7 |           |
| Mamma    | C | miR-19 | -0.8272 |   |   |          | 48  | -0.201047 | 79  | 0.072149  | 46  | -0.128897 |
| ry gland | S | 3a-5p  | 22944   | - | - | Negative | 2   | 519       | 7   | 786       | 6   | 733       |
|          |   |        |         |   |   |          | 0.4 |           | 0.0 |           | 0.2 |           |
| Mamma    | C | miR-19 | -0.8455 |   |   |          | 22  | 0.393622  | 76  | -0.755496 | 27  | -0.361873 |
| ry gland | S | 9c     | 47182   | - | - | Negative | 8   | 911       | 6   | 877       | 7   | 966       |
|          |   |        |         |   |   |          | 0.4 |           | 0.5 |           |     |           |
| Mamma    | C | miR-37 | -0.8393 |   |   |          | 92  | -0.304334 | 48  | -0.190430 | 0.0 | -0.494764 |
| ry gland | S | 8c     | 37869   | - | - | Negative | 2   | 035       | 8   | 657       | 54  | 692       |
|          |   |        |         |   |   |          | 0.3 |           | 0.3 |           | 0.8 |           |
| Mamma    | C | miR-38 | -0.8598 |   |   |          | 81  | -1.425305 | 92  | 1.384663  | 64  | -0.040641 |
| ry gland | S | 2      | 98807   | - | - | Negative | 2   | 835       | 7   | 85        | 4   | 984       |
|          |   |        |         |   |   |          | 0.1 |           | 0.3 |           | 0.4 |           |
| Mamma    | C | miR-42 | -0.8463 |   |   |          | 69  | 0.703256  | 79  | -0.468188 | 04  | 0.235067  |
| ry gland | S | 4-5p   | 97003   | - | - | Negative | 8   | 233       | 9   | 978       | 5   | 254       |
|          |   |        |         |   |   |          | 0.3 |           |     |           | 0.9 |           |
| Mamma    | C | miR-43 | -0.8363 |   |   |          | 86  | -0.459431 | 0.3 | 0.459431  | 98  |           |
| ry gland | S | 2      | 74536   | - | - | Negative | 8   | 619       | 67  | 619       | 2   | 0         |
| Mamma    | C | miR-45 | -0.9564 |   |   |          | 0.0 | 0.972920  | 0.0 | -1.069821 | 0.7 | -0.096900 |
| ry gland | S | 0a     | 37415   | - | - | Negative | 75  | 466       | 30  | 449       | 80  | 984       |

|          |   |        |         |           |   |          |     |           |     |           |     |                     |
|----------|---|--------|---------|-----------|---|----------|-----|-----------|-----|-----------|-----|---------------------|
|          |   |        |         |           |   |          | 5   |           | 3   |           | 4   |                     |
|          |   |        |         |           |   |          | 0.2 |           | 0.0 |           | 0.5 |                     |
| Mamma    | C | miR-45 | -0.9443 |           |   |          | 56  | 0.576042  | 85  | -0.733678 | 76  | -0.157636           |
| ry gland | S | 0b     | 65241   | -         | - | Negative | 8   | 122       | 7   | 335       | 6   | 213                 |
|          |   |        |         |           |   |          | 0.6 |           |     |           | 0.3 |                     |
| Mamma    | C | miR-45 | -0.8831 |           |   |          | 58  | 0.229481  | 0.2 | -0.559871 | 59  | -0.330389           |
| ry gland | S | 5-3p   | 39774   | -         | - | Negative | 9   | 846       | 61  | 52        | 1   | 674                 |
|          |   |        |         |           |   |          |     |           |     |           | 0.3 | Mammary Gland(Down) |
| Mamma    | C | miR-48 | -0.9875 |           |   |          | 0.8 | 0.169925  | 0.1 | -0.700439 | 03  | -0.530514           |
| ry gland | S | 3      | 76005   | -         | - | Negative | 74  | 001       | 94  | 718       | 9   | 717                 |
|          |   |        |         |           |   |          | 0.0 |           |     |           | 0.1 |                     |
| Mamma    | C | miR-58 | -0.8527 |           |   |          | 50  | 0.839535  | 0.0 | -1.306661 | 39  | -0.467126           |
| ry gland | S | 2      | 1451    | -         | - | Negative | 9   | 328       | 05  | 338       | 6   | 01                  |
|          |   |        |         |           |   |          | 0.3 |           | 0.5 |           | 0.8 |                     |
| Mamma    | C | miR-65 | -0.8284 |           |   |          | 43  | 0.584962  | 59  | -0.485426 | 00  | 0.099535            |
| ry gland | S | 31     | 98744   | -         | - | Negative | 7   | 501       | 9   | 827       | 1   | 674                 |
|          |   |        |         |           |   |          | 0.1 |           | 0.1 |           | 0.8 |                     |
| Mamma    | C | miR-65 | -0.8576 |           |   |          | 75  | 0.812914  | 72  | -0.709409 | 02  | 0.103504            |
| ry gland | S | 5      | 16788   | -         | - | Negative | 8   | 447       | 4   | 872       | 5   | 576                 |
|          |   |        |         |           |   |          | 0.5 |           | 0.5 |           | 0.1 |                     |
| Mamma    | C | miR-76 | -0.8983 |           |   |          | 50  | -0.398549 | 37  | -0.311944 | 26  | -0.710493           |
| ry gland | S | 0-3p   | 80811   | -         | - | Negative | 7   | 376       | 4   | 006       | 3   | 383                 |
|          |   |        |         |           |   |          | 0.9 |           | 0.0 |           | 0.0 |                     |
| Mamma    | C | miR-88 | -0.8857 |           |   |          | 91  | 0.007455  | 54  | -0.823988 | 48  | -0.816532           |
| ry gland | S | 5      | 21659   | -         | - | Negative | 8   | 805       | 8   | 656       | 9   | 851                 |
|          |   |        |         |           |   |          | 0.7 |           | 0.0 |           | 0.0 |                     |
| Mamma    | A | miR-10 |         | -0.852843 |   |          | 56  | -0.127953 | 10  | 1.000285  | 84  | 0.872332            |
| ry gland | L | b      |         |           | 8 | Negative | 5   | 009       | 7   | 677       | 5   | 668                 |
|          |   |        |         |           |   |          |     |           |     |           |     | Mammary Gland(Up)   |

|          |   |        |         |           |   |          |     |           |     |          |     |           |           |
|----------|---|--------|---------|-----------|---|----------|-----|-----------|-----|----------|-----|-----------|-----------|
| Mamma    | A | miR-12 |         | -0.837195 |   |          | 0.2 |           |     |          | 0.4 |           |           |
| ry gland | L | 71     | -       | 801       | - | Negative | 17  | -1.165490 | 0.1 | 1.764469 | 40  | 0.598979  |           |
|          |   |        |         |           |   |          | 3   | 03        | 06  | 109      | 5   | 079       |           |
|          |   |        |         |           |   |          | 0.1 |           | 0.0 |          | 0.2 |           |           |
| Mamma    | A | miR-14 |         | -0.884138 |   |          | 11  | -1.247750 | 57  | 1.780410 | 62  | 0.532659  |           |
| ry gland | L | 6b     | -       | 619       | - | Negative | 3   | 918       | 2   | 768      | 4   | 85        |           |
|          |   |        |         |           |   |          | 0.8 |           | 0.5 |          |     |           |           |
| Mamma    | A | miR-99 |         | -0.870173 |   |          | 51  | -0.132228 | 45  | 0.437150 | 0.5 | 0.304921  | Mammary   |
| ry gland | L | a-5p   | -       | 156       | - | Negative | 4   | 905       | 9   | 101      | 5   | 196       | Gland(Up) |
|          |   |        |         |           |   |          | 0.4 |           | 0.5 |          | 0.7 |           |           |
| Mamma    | A | miR-99 | -0.8512 | -0.923209 |   |          | 25  | -0.538375 | 24  | 0.426524 | 47  | -0.111850 |           |
| ry gland | L | b      | 84443   | 297       | - | Negative | 4   | 624       | 8   | 989      | 1   | 636       |           |

**Table S8.** Amino acids related functions targeted by microRNAs associated with feed efficiency, nitrogen efficiency or milk urea nitrogen content in rumen, duodenum, jejunum, liver and mammary gland.

| <b>Amino acids related functions</b> |                |                    |                                  |            |                        |
|--------------------------------------|----------------|--------------------|----------------------------------|------------|------------------------|
| <b>Tissue</b>                        | <b>Diet</b>    | <b>Correlation</b> | <b>Function</b>                  | <b>FDR</b> | <b>number of miRNA</b> |
| Rumen                                | Alfalfa<br>hay | Positive           | transport of amino acids         | 1.53E-04   | 13                     |
| Rumen                                | Alfalfa<br>hay | Positive           | metabolism of amino acids        | 5.15E-03   | 13                     |
| Rumen                                | Alfalfa<br>hay | Negative           | release of L-amino acid          | 4.51E-04   | 13                     |
| Rumen                                | Rice<br>straw  | Negative           | phosphorylation of L-amino acid  | 2.72E-06   | 18                     |
| Rumen                                | Rice<br>straw  | Negative           | transport of amino acids         | 8.01E-06   | 13                     |
| Rumen                                | Rice<br>straw  | Negative           | release of amino acids           | 5.01E-05   | 17                     |
| Duodenum                             | Alfalfa<br>hay | Positive           | transport of amino acids         | 4.30E-02   | 12                     |
| Duodenum                             | Alfalfa<br>hay | Negative           | phosphorylation of L-amino acid  | 3.93E-09   | 68                     |
| Duodenum                             | Alfalfa<br>hay | Negative           | release of L-amino acid          | 8.89E-06   | 58                     |
| Duodenum                             | Corn<br>stover | Positive           | release of amino acids           | 9.01E-05   | 32                     |
| Duodenum                             | Corn<br>stover | Negative           | transport of amino acids         | 4.15E-05   | 22                     |
| Duodenum                             | Corn<br>stover | Negative           | phosphorylation of L-amino acid  | 5.30E-05   | 30                     |
| Duodenum                             | Corn<br>stover | Negative           | abnormal quantity of amino acids | 2.55E-04   | 26                     |
| Jejunum                              | Alfalfa<br>hay | Positive           | transport of alpha-amino acid    | 2.45E-04   | 17                     |
| Jejunum                              | Alfalfa<br>hay | Negative           | phosphorylation of L-amino acid  | 5.45E-04   | 20                     |
| Jejunum                              | Alfalfa<br>hay | Negative           | transport of amino acids         | 7.96E-04   | 20                     |
| Jejunum                              | Corn<br>stover | Positive           | phosphorylation of L-amino acid  | 4.11E-04   | 17                     |
| Jejunum                              | Rice<br>straw  | Positive           | phosphorylation of L-amino acid  | 8.20E-07   | 14                     |

|         |                |          |                                 |          |    |
|---------|----------------|----------|---------------------------------|----------|----|
| Jejunum | Rice<br>straw  | Positive | transport of amino acids        | 1.59E-05 | 15 |
| Jejunum | Rice<br>straw  | Negative | transport of amino acids        | 1.36E-03 | 6  |
| Liver   | Alfalfa<br>hay | Positive | phosphorylation of amino acids  | 2.36E-06 | 14 |
| Liver   | Alfalfa<br>hay | Negative | phosphorylation of L-amino acid | 2.62E-05 | 13 |
| Liver   | Corn<br>stover | Positive | phosphorylation of L-amino acid | 3.45E-06 | 36 |
| Liver   | Rice<br>straw  | Negative | phosphorylation of L-amino acid | 2.26E-06 | 29 |
| Mammary | Alfalfa<br>hay | Positive | phosphorylation of amino acids  | 1.83E-08 | 44 |
| Mammary | Alfalfa<br>hay | Negative | transport of amino acids        | 9.23E-03 | 10 |
| Mammary | Corn<br>stover | Positive | phosphorylation of L-amino acid | 7.76E-04 | 13 |
| Mammary | Corn<br>stover | Positive | release of amino acids          | 2.74E-03 | 14 |
| Mammary | Corn<br>stover | Negative | phosphorylation of L-amino acid | 3.93E-08 | 49 |
| Mammary | Rice<br>straw  | Negative | phosphorylation of L-amino acid | 2.66E-06 | 31 |
| Mammary | Rice<br>straw  | Negative | transport of amino acids        | 3.91E-04 | 28 |

---

#### All the Functions

---

| Tissue | Diet           | Correlation | Diseases or Functions Annotation | p-Value  | # Molecules |
|--------|----------------|-------------|----------------------------------|----------|-------------|
| Rumen  | Alfalfa<br>hay | Positive    | organismal death                 | 3.95E-22 | 643         |
| Rumen  | Alfalfa<br>hay | Positive    | morbidity or mortality           | 1.15E-21 | 647         |
| Rumen  | Alfalfa<br>hay | Positive    | cancer                           | 1.51E-18 | 2319        |
| Rumen  | Alfalfa<br>hay | Positive    | proliferation of cells           | 4.61E-18 | 900         |
| Rumen  | Alfalfa<br>hay | Positive    | malignant solid tumor            | 7.81E-18 | 2290        |
| Rumen  | Alfalfa<br>hay | Positive    | cell death                       | 4.53E-17 | 819         |
| Rumen  | Alfalfa<br>hay | Positive    | morphology of cells              | 5.03E-16 | 513         |
| Rumen  | Alfalfa        | Positive    | transport of molecule            | 8.27E-16 | 437         |

|       |         |          |                                       |          |      |
|-------|---------|----------|---------------------------------------|----------|------|
|       | hay     |          |                                       |          |      |
|       | Alfalfa |          |                                       |          |      |
| Rumen | hay     | Positive | necrosis                              | 1.48E-14 | 642  |
|       | Alfalfa |          |                                       |          |      |
| Rumen | hay     | Positive | apoptosis                             | 6.68E-13 | 648  |
|       | Alfalfa |          |                                       |          |      |
| Rumen | hay     | Positive | quantity of cells                     | 1.96E-10 | 446  |
|       | Alfalfa |          |                                       |          |      |
| Rumen | hay     | Positive | abnormal morphology of cells          | 1.51E-09 | 330  |
|       | Alfalfa |          |                                       |          |      |
| Rumen | hay     | Positive | quantity of leukocytes                | 1.73E-09 | 250  |
|       | Alfalfa |          |                                       |          |      |
| Rumen | hay     | Positive | cell death of connective tissue cells | 1.74E-09 | 175  |
|       | Alfalfa |          |                                       |          |      |
| Rumen | hay     | Positive | epithelial cancer                     | 2.12E-09 | 1867 |
|       | Alfalfa |          |                                       |          |      |
| Rumen | hay     | Positive | transcription                         | 2.72E-09 | 488  |
|       | Alfalfa |          |                                       |          |      |
| Rumen | hay     | Positive | expression of RNA                     | 3.17E-09 | 520  |
|       | Alfalfa |          |                                       |          |      |
| Rumen | hay     | Positive | tumorigenesis of tissue               | 4.81E-09 | 1909 |
|       | Alfalfa |          |                                       |          |      |
| Rumen | hay     | Positive | neoplasia of epithelial tissue        | 4.81E-09 | 1880 |
|       | Alfalfa |          |                                       |          |      |
| Rumen | hay     | Positive | quantity of blood cells               | 4.81E-09 | 273  |
|       | Alfalfa |          |                                       |          |      |
| Rumen | hay     | Positive | development of body trunk             | 5.21E-09 | 293  |
|       | Alfalfa |          |                                       |          |      |
| Rumen | hay     | Positive | organization of cytoplasm             | 5.63E-09 | 385  |
|       | Alfalfa |          |                                       |          |      |
| Rumen | hay     | Positive | cellular homeostasis                  | 7.29E-09 | 382  |
|       | Alfalfa |          |                                       |          |      |
| Rumen | hay     | Positive | concentration of lipid                | 1.12E-08 | 221  |
|       | Alfalfa |          |                                       |          |      |
| Rumen | hay     | Positive | cell movement                         | 1.36E-08 | 511  |
|       | Alfalfa |          |                                       |          |      |
| Rumen | hay     | Positive | perinatal death                       | 2.36E-08 | 168  |
|       | Alfalfa |          |                                       |          |      |
| Rumen | hay     | Positive | Movement Disorders                    | 2.90E-08 | 276  |
|       | Alfalfa |          |                                       |          |      |
| Rumen | hay     | Positive | digestive system cancer               | 5.13E-08 | 1604 |
|       | Alfalfa |          |                                       |          |      |
| Rumen | hay     | Positive | digestive organ tumor                 | 5.13E-08 | 1618 |
| Rumen | Alfalfa | Positive | organization of cytoskeleton          | 5.28E-08 | 349  |

|       |         |          |                                           |          |      |
|-------|---------|----------|-------------------------------------------|----------|------|
|       | hay     |          |                                           |          |      |
|       | Alfalfa |          |                                           |          |      |
| Rumen | hay     | Positive | Growth Failure                            | 7.03E-08 | 167  |
|       | Alfalfa |          |                                           |          |      |
| Rumen | hay     | Positive | transcription of RNA                      | 8.10E-08 | 448  |
|       | Alfalfa |          |                                           |          |      |
| Rumen | hay     | Positive | abdominal neoplasm                        | 1.17E-07 | 1854 |
|       | Alfalfa |          |                                           |          |      |
| Rumen | hay     | Positive | synthesis of lipid                        | 1.56E-07 | 193  |
|       | Alfalfa |          |                                           |          |      |
| Rumen | hay     | Positive | vasculogenesis                            | 1.74E-07 | 198  |
|       | Alfalfa |          |                                           |          |      |
| Rumen | hay     | Positive | development of lymphatic system           | 1.93E-07 | 106  |
|       | Alfalfa |          |                                           |          |      |
| Rumen | hay     | Positive | abdominal cancer                          | 2.97E-07 | 1830 |
|       | Alfalfa |          |                                           |          |      |
| Rumen | hay     | Positive | Organ Degeneration                        | 2.97E-07 | 139  |
|       | Alfalfa |          |                                           |          |      |
| Rumen | hay     | Positive | development of blood cells                | 3.11E-07 | 177  |
|       | Alfalfa |          |                                           |          |      |
| Rumen | hay     | Positive | morphology of cardiovascular system       | 3.39E-07 | 169  |
|       | Alfalfa |          |                                           |          |      |
| Rumen | hay     | Positive | migration of cells                        | 3.55E-07 | 453  |
|       | Alfalfa |          |                                           |          |      |
| Rumen | hay     | Positive | quantity of mononuclear leukocytes        | 3.57E-07 | 196  |
|       | Alfalfa |          |                                           |          |      |
| Rumen | hay     | Positive | uptake of monosaccharide                  | 3.57E-07 | 83   |
|       | Alfalfa |          |                                           |          |      |
| Rumen | hay     | Positive | microtubule dynamics                      | 3.99E-07 | 297  |
|       | Alfalfa |          |                                           |          |      |
| Rumen | hay     | Positive | differentiation of cells                  | 4.03E-07 | 526  |
|       | Alfalfa |          |                                           |          |      |
| Rumen | hay     | Positive | development of leukocytes                 | 4.31E-07 | 161  |
|       | Alfalfa |          |                                           |          |      |
| Rumen | hay     | Positive | size of body                              | 4.56E-07 | 222  |
|       | Alfalfa |          |                                           |          |      |
| Rumen | hay     | Positive | uptake of carbohydrate                    | 4.66E-07 | 88   |
|       | Alfalfa |          |                                           |          |      |
| Rumen | hay     | Positive | autosomal recessive disease               | 7.39E-07 | 237  |
|       | Alfalfa |          |                                           |          |      |
| Rumen | hay     | Positive | development of lymphatic system component | 7.39E-07 | 92   |
|       | Alfalfa |          |                                           |          |      |
| Rumen | hay     | Positive | cell movement of tumor cell lines         | 7.48E-07 | 221  |
| Rumen | Alfalfa | Positive | cell death of fibroblast cell lines       | 7.65E-07 | 121  |



|       |         |          |                                              |          |     |
|-------|---------|----------|----------------------------------------------|----------|-----|
|       | hay     |          |                                              |          |     |
|       | Alfalfa |          |                                              |          |     |
| Rumen | hay     | Positive | abnormal morphology of thoracic cavity       | 9.04E-07 | 159 |
|       | Alfalfa |          |                                              |          |     |
| Rumen | hay     | Positive | cell survival                                | 9.96E-07 | 340 |
|       | Alfalfa |          |                                              |          |     |
| Rumen | hay     | Positive | formation of cytoskeleton                    | 1.02E-06 | 108 |
|       | Alfalfa |          |                                              |          |     |
| Rumen | hay     | Positive | quantity of lymphocytes                      | 1.02E-06 | 187 |
|       | Alfalfa |          |                                              |          |     |
| Rumen | hay     | Positive | formation of lymphatic system component      | 1.20E-06 | 87  |
|       | Alfalfa |          |                                              |          |     |
| Rumen | hay     | Positive | cell death of tumor cell lines               | 1.23E-06 | 368 |
|       | Alfalfa |          |                                              |          |     |
| Rumen | hay     | Positive | development of vasculature                   | 1.25E-06 | 118 |
|       | Alfalfa |          |                                              |          |     |
| Rumen | hay     | Positive | organization of organelle                    | 1.26E-06 | 147 |
|       | Alfalfa |          |                                              |          |     |
| Rumen | hay     | Positive | cell viability                               | 1.26E-06 | 319 |
|       | Alfalfa |          |                                              |          |     |
| Rumen | hay     | Positive | development of cytoplasm                     | 1.69E-06 | 128 |
|       | Alfalfa |          |                                              |          |     |
| Rumen | hay     | Positive | morphology of bone                           | 1.75E-06 | 125 |
|       | Alfalfa |          |                                              |          |     |
| Rumen | hay     | Positive | uptake of D-hexose                           | 1.91E-06 | 69  |
|       | Alfalfa |          |                                              |          |     |
| Rumen | hay     | Positive | angiogenesis                                 | 1.99E-06 | 231 |
|       | Alfalfa |          |                                              |          |     |
| Rumen | hay     | Positive | formation of cells                           | 2.07E-06 | 248 |
|       | Alfalfa |          |                                              |          |     |
| Rumen | hay     | Positive | dyskinesia                                   | 2.38E-06 | 164 |
|       | Alfalfa |          |                                              |          |     |
| Rumen | hay     | Positive | neuromuscular disease                        | 2.55E-06 | 225 |
|       | Alfalfa |          |                                              |          |     |
| Rumen | hay     | Positive | abnormal morphology of bone                  | 2.55E-06 | 121 |
|       | Alfalfa |          |                                              |          |     |
| Rumen | hay     | Positive | uptake of D-glucose                          | 2.55E-06 | 68  |
|       | Alfalfa |          |                                              |          |     |
| Rumen | hay     | Positive | development of connective tissue             | 2.80E-06 | 105 |
|       | Alfalfa |          |                                              |          |     |
| Rumen | hay     | Positive | abnormal morphology of cardiovascular system | 2.83E-06 | 152 |
|       | Alfalfa |          |                                              |          |     |
| Rumen | hay     | Positive | growth of organism                           | 2.86E-06 | 214 |
| Rumen | Alfalfa | Positive | neurological signs                           | 3.76E-06 | 171 |

|       |         |          |                                          |          |     |
|-------|---------|----------|------------------------------------------|----------|-----|
|       | hay     |          |                                          |          |     |
|       | Alfalfa |          |                                          |          |     |
| Rumen | hay     | Positive | Huntington's Disease                     | 3.94E-06 | 153 |
|       | Alfalfa |          |                                          |          |     |
| Rumen | hay     | Positive | abnormal morphology of head              | 4.87E-06 | 212 |
|       | Alfalfa |          |                                          |          |     |
| Rumen | hay     | Positive | formation of lymphoid organ              | 5.08E-06 | 78  |
|       | Alfalfa |          |                                          |          |     |
| Rumen | hay     | Positive | neonatal death                           | 6.65E-06 | 120 |
|       | Alfalfa |          |                                          |          |     |
| Rumen | hay     | Positive | development of lymphocytes               | 6.65E-06 | 147 |
|       | Alfalfa |          |                                          |          |     |
| Rumen | hay     | Positive | abnormal morphology of epithelial tissue | 6.65E-06 | 115 |
|       | Alfalfa |          |                                          |          |     |
| Rumen | hay     | Positive | fatty acid metabolism                    | 6.65E-06 | 158 |
|       | Alfalfa |          |                                          |          |     |
| Rumen | hay     | Positive | epilepsy                                 | 7.35E-06 | 88  |
|       | Alfalfa |          |                                          |          |     |
| Rumen | hay     | Positive | epileptic seizure                        | 8.72E-06 | 53  |
|       | Alfalfa |          |                                          |          |     |
| Rumen | hay     | Positive | neuronal cell death                      | 9.18E-06 | 176 |
|       | Alfalfa |          |                                          |          |     |
| Rumen | hay     | Positive | Lymphocyte homeostasis                   | 1.10E-05 | 144 |
|       | Alfalfa |          |                                          |          |     |
| Rumen | hay     | Positive | transcription of DNA                     | 1.10E-05 | 363 |
|       | Alfalfa |          |                                          |          |     |
| Rumen | hay     | Positive | T cell development                       | 1.10E-05 | 134 |
|       | Alfalfa |          |                                          |          |     |
| Rumen | hay     | Positive | disorder of basal ganglia                | 1.13E-05 | 195 |
|       | Alfalfa |          |                                          |          |     |
| Rumen | hay     | Positive | proliferation of blood cells             | 1.16E-05 | 212 |
|       | Alfalfa |          |                                          |          |     |
| Rumen | hay     | Positive | homeostasis of leukocytes                | 1.23E-05 | 146 |
|       | Alfalfa |          |                                          |          |     |
| Rumen | hay     | Positive | degeneration of cells                    | 1.23E-05 | 96  |
|       | Alfalfa |          |                                          |          |     |
| Rumen | hay     | Positive | accumulation of lipid                    | 1.23E-05 | 85  |
|       | Alfalfa |          |                                          |          |     |
| Rumen | hay     | Positive | degeneration of nervous system           | 1.33E-05 | 82  |
|       | Alfalfa |          |                                          |          |     |
| Rumen | hay     | Positive | quantity of phagocytes                   | 1.34E-05 | 115 |
|       | Alfalfa |          |                                          |          |     |
| Rumen | hay     | Positive | morphology of body cavity                | 1.36E-05 | 289 |
| Rumen | Alfalfa | Positive | morphology of head                       | 1.36E-05 | 219 |

|       |         |          |                                          |          |     |
|-------|---------|----------|------------------------------------------|----------|-----|
|       | hay     |          |                                          |          |     |
|       | Alfalfa |          |                                          |          |     |
| Rumen | hay     | Positive | formation of actin filaments             | 1.59E-05 | 86  |
|       | Alfalfa |          |                                          |          |     |
| Rumen | hay     | Positive | apoptosis of tumor cell lines            | 1.60E-05 | 292 |
|       | Alfalfa |          |                                          |          |     |
| Rumen | hay     | Positive | abnormal morphology of body cavity       | 1.64E-05 | 277 |
|       | Alfalfa |          |                                          |          |     |
| Rumen | hay     | Positive | abnormal morphology of skull             | 1.76E-05 | 65  |
|       | Alfalfa |          |                                          |          |     |
| Rumen | hay     | Positive | function of leukocytes                   | 1.78E-05 | 141 |
|       | Alfalfa |          |                                          |          |     |
| Rumen | hay     | Positive | proliferation of neuronal cells          | 1.79E-05 | 150 |
|       | Alfalfa |          |                                          |          |     |
| Rumen | hay     | Positive | T cell homeostasis                       | 1.79E-05 | 136 |
|       | Alfalfa |          |                                          |          |     |
| Rumen | hay     | Positive | differentiation of connective tissue     | 2.02E-05 | 185 |
|       | Alfalfa |          |                                          |          |     |
| Rumen | hay     | Positive | Viral Infection                          | 2.03E-05 | 377 |
|       | Alfalfa |          |                                          |          |     |
| Rumen | hay     | Positive | proliferation of immune cells            | 2.07E-05 | 199 |
|       | Alfalfa |          |                                          |          |     |
| Rumen | hay     | Positive | transport of alpha-amino acid            | 2.15E-05 | 27  |
|       | Alfalfa |          |                                          |          |     |
| Rumen | hay     | Positive | migration of blood cells                 | 2.22E-05 | 217 |
|       | Alfalfa |          |                                          |          |     |
| Rumen | hay     | Positive | apoptosis of fibroblast cell lines       | 2.27E-05 | 91  |
|       | Alfalfa |          |                                          |          |     |
| Rumen | hay     | Positive | leukocyte migration                      | 2.94E-05 | 216 |
|       | Alfalfa |          |                                          |          |     |
| Rumen | hay     | Positive | abnormal morphology of abdomen           | 3.03E-05 | 217 |
|       | Alfalfa |          |                                          |          |     |
| Rumen | hay     | Positive | seizure disorder                         | 3.27E-05 | 124 |
|       | Alfalfa |          |                                          |          |     |
| Rumen | hay     | Positive | concentration of phospholipid            | 3.91E-05 | 55  |
|       | Alfalfa |          |                                          |          |     |
| Rumen | hay     | Positive | apoptosis of epithelial cell lines       | 3.91E-05 | 65  |
|       | Alfalfa |          |                                          |          |     |
| Rumen | hay     | Positive | ubiquitination of protein                | 3.91E-05 | 91  |
|       | Alfalfa |          |                                          |          |     |
| Rumen | hay     | Positive | morphology of vessel                     | 3.98E-05 | 85  |
|       | Alfalfa |          |                                          |          |     |
| Rumen | hay     | Positive | proliferation of connective tissue cells | 4.21E-05 | 152 |
| Rumen | Alfalfa | Positive | ubiquitination                           | 4.41E-05 | 92  |

|       |         |          |                                            |          |     |
|-------|---------|----------|--------------------------------------------|----------|-----|
|       | hay     |          |                                            |          |     |
|       | Alfalfa |          |                                            |          |     |
| Rumen | hay     | Positive | cell death of cervical cancer cell lines   | 5.29E-05 | 95  |
|       | Alfalfa |          |                                            |          |     |
| Rumen | hay     | Positive | proliferation of tumor cell lines          | 5.46E-05 | 360 |
|       | Alfalfa |          |                                            |          |     |
| Rumen | hay     | Positive | Neurodegeneration                          | 5.46E-05 | 85  |
|       | Alfalfa |          |                                            |          |     |
| Rumen | hay     | Positive | quantity of reactive oxygen species        | 5.46E-05 | 53  |
|       | Alfalfa |          |                                            |          |     |
| Rumen | hay     | Positive | formation of filaments                     | 5.46E-05 | 106 |
|       | Alfalfa |          |                                            |          |     |
| Rumen | hay     | Positive | abnormal morphology of reproductive system | 5.46E-05 | 132 |
|       | Alfalfa |          |                                            |          |     |
| Rumen | hay     | Positive | quantity of T lymphocytes                  | 5.59E-05 | 138 |
|       | Alfalfa |          |                                            |          |     |
| Rumen | hay     | Positive | cell death of epithelial cells             | 6.00E-05 | 129 |
|       | Alfalfa |          |                                            |          |     |
| Rumen | hay     | Positive | fibrogenesis                               | 6.00E-05 | 109 |
|       | Alfalfa |          |                                            |          |     |
| Rumen | hay     | Positive | degeneration of neurons                    | 6.00E-05 | 68  |
|       | Alfalfa |          |                                            |          |     |
| Rumen | hay     | Positive | transport of inorganic cation              | 6.10E-05 | 95  |
|       | Alfalfa |          |                                            |          |     |
| Rumen | hay     | Positive | transport of carbohydrate                  | 6.15E-05 | 57  |
|       | Alfalfa |          |                                            |          |     |
| Rumen | hay     | Positive | necrosis of epithelial tissue              | 6.34E-05 | 150 |
|       | Alfalfa |          |                                            |          |     |
| Rumen | hay     | Positive | Edema                                      | 6.38E-05 | 93  |
|       | Alfalfa |          |                                            |          |     |
| Rumen | hay     | Positive | formation of actin stress fibers           | 6.65E-05 | 68  |
|       | Alfalfa |          |                                            |          |     |
| Rumen | hay     | Positive | activation of cells                        | 6.78E-05 | 237 |
|       | Alfalfa |          |                                            |          |     |
| Rumen | hay     | Positive | protein kinase cascade                     | 7.00E-05 | 111 |
|       | Alfalfa |          |                                            |          |     |
| Rumen | hay     | Positive | morphology of respiratory system           | 7.01E-05 | 85  |
|       | Alfalfa |          |                                            |          |     |
| Rumen | hay     | Positive | differentiation of connective tissue cells | 7.22E-05 | 162 |
|       | Alfalfa |          |                                            |          |     |
| Rumen | hay     | Positive | metabolism of carbohydrate                 | 7.32E-05 | 157 |
|       | Alfalfa |          |                                            |          |     |
| Rumen | hay     | Positive | transport of metal                         | 7.92E-05 | 90  |
| Rumen | Alfalfa | Positive | transactivation                            | 7.94E-05 | 147 |

|       |         |          |                                           |          |     |
|-------|---------|----------|-------------------------------------------|----------|-----|
|       | hay     |          |                                           |          |     |
|       | Alfalfa |          |                                           |          |     |
| Rumen | hay     | Positive | morphology of heart                       | 8.02E-05 | 107 |
|       | Alfalfa |          |                                           |          |     |
| Rumen | hay     | Positive | growth of connective tissue               | 8.12E-05 | 162 |
|       | Alfalfa |          |                                           |          |     |
| Rumen | hay     | Positive | cellular degradation                      | 8.62E-05 | 71  |
|       | Alfalfa |          |                                           |          |     |
| Rumen | hay     | Positive | concentration of fatty acid               | 8.97E-05 | 77  |
|       | Alfalfa |          |                                           |          |     |
| Rumen | hay     | Positive | development of abdomen                    | 9.01E-05 | 147 |
|       | Alfalfa |          |                                           |          |     |
| Rumen | hay     | Positive | transport of cation                       | 9.41E-05 | 106 |
|       | Alfalfa |          |                                           |          |     |
| Rumen | hay     | Positive | quantity of connective tissue             | 1.03E-04 | 152 |
|       | Alfalfa |          |                                           |          |     |
| Rumen | hay     | Positive | cell movement of leukocytes               | 1.03E-04 | 189 |
|       | Alfalfa |          |                                           |          |     |
| Rumen | hay     | Positive | generation of reactive oxygen species     | 1.06E-04 | 59  |
|       | Alfalfa |          |                                           |          |     |
| Rumen | hay     | Positive | cell spreading                            | 1.06E-04 | 76  |
|       | Alfalfa |          |                                           |          |     |
| Rumen | hay     | Positive | oral squamous cell carcinoma              | 1.08E-04 | 52  |
|       | Alfalfa |          |                                           |          |     |
| Rumen | hay     | Positive | transport of metal ion                    | 1.15E-04 | 86  |
|       | Alfalfa |          |                                           |          |     |
| Rumen | hay     | Positive | function of blood cells                   | 1.15E-04 | 148 |
|       | Alfalfa |          |                                           |          |     |
| Rumen | hay     | Positive | abnormal morphology of respiratory system | 1.18E-04 | 83  |
|       | Alfalfa |          |                                           |          |     |
| Rumen | hay     | Positive | morphology of reproductive system         | 1.28E-04 | 136 |
|       | Alfalfa |          |                                           |          |     |
| Rumen | hay     | Positive | activation of blood cells                 | 1.29E-04 | 184 |
|       | Alfalfa |          |                                           |          |     |
| Rumen | hay     | Positive | cell death of breast cancer cell lines    | 1.34E-04 | 89  |
|       | Alfalfa |          |                                           |          |     |
| Rumen | hay     | Positive | cell death of epithelial cell lines       | 1.34E-04 | 77  |
|       | Alfalfa |          |                                           |          |     |
| Rumen | hay     | Positive | quantity of steroid                       | 1.35E-04 | 120 |
|       | Alfalfa |          |                                           |          |     |
| Rumen | hay     | Positive | differentiation of leukocytes             | 1.35E-04 | 167 |
|       | Alfalfa |          |                                           |          |     |
| Rumen | hay     | Positive | transport of ion                          | 1.35E-04 | 129 |
| Rumen | Alfalfa | Positive | proliferation of fibroblast cell lines    | 1.39E-04 | 110 |

|       |         |          |                                            |          |     |
|-------|---------|----------|--------------------------------------------|----------|-----|
|       | hay     |          |                                            |          |     |
|       | Alfalfa |          |                                            |          |     |
| Rumen | hay     | Positive | differentiation of mononuclear leukocytes  | 1.41E-04 | 137 |
|       | Alfalfa |          |                                            |          |     |
| Rumen | hay     | Positive | formation of cellular protrusions          | 1.45E-04 | 218 |
|       | Alfalfa |          |                                            |          |     |
| Rumen | hay     | Positive | differentiation of lymphocytes             | 1.46E-04 | 127 |
|       | Alfalfa |          |                                            |          |     |
| Rumen | hay     | Positive | accumulation of steroid                    | 1.52E-04 | 28  |
|       | Alfalfa |          |                                            |          |     |
| Rumen | hay     | Positive | transport of amino acids                   | 1.53E-04 | 41  |
|       | Alfalfa |          |                                            |          |     |
| Rumen | hay     | Positive | seizures                                   | 1.62E-04 | 104 |
|       | Alfalfa |          |                                            |          |     |
| Rumen | hay     | Positive | transport of monosaccharide                | 1.64E-04 | 47  |
|       | Alfalfa |          |                                            |          |     |
| Rumen | hay     | Positive | apoptosis of kidney cell lines             | 1.80E-04 | 66  |
|       | Alfalfa |          |                                            |          |     |
| Rumen | hay     | Positive | proliferation of ovarian cancer cell lines | 1.82E-04 | 41  |
|       | Alfalfa |          |                                            |          |     |
| Rumen | hay     | Positive | quantity of antigen presenting cells       | 1.86E-04 | 75  |
|       | Alfalfa |          |                                            |          |     |
| Rumen | hay     | Positive | demyelination of central nervous system    | 1.91E-04 | 18  |
|       | Alfalfa |          |                                            |          |     |
| Rumen | hay     | Positive | morphology of endothelial tissue           | 1.91E-04 | 28  |
|       | Alfalfa |          |                                            |          |     |
| Rumen | hay     | Positive | HIV infection                              | 1.91E-04 | 175 |
|       | Alfalfa |          |                                            |          |     |
| Rumen | hay     | Positive | chronic myeloid leukemia                   | 1.92E-04 | 34  |
|       | Alfalfa |          |                                            |          |     |
| Rumen | hay     | Positive | cell movement of myeloid cells             | 1.98E-04 | 136 |
|       | Alfalfa |          |                                            |          |     |
| Rumen | hay     | Positive | homing of cells                            | 1.99E-04 | 140 |
|       | Alfalfa |          |                                            |          |     |
| Rumen | hay     | Positive | abnormal quantity of lipid                 | 2.01E-04 | 44  |
|       | Alfalfa |          |                                            |          |     |
| Rumen | hay     | Positive | morphology of digestive system             | 2.01E-04 | 143 |
|       | Alfalfa |          |                                            |          |     |
| Rumen | hay     | Positive | morphology of cardiovascular tissue        | 2.08E-04 | 29  |
|       | Alfalfa |          |                                            |          |     |
| Rumen | hay     | Positive | proliferation of lymphocytes               | 2.08E-04 | 178 |
|       | Alfalfa |          |                                            |          |     |
| Rumen | hay     | Positive | synthesis of reactive oxygen species       | 2.14E-04 | 122 |
| Rumen | Alfalfa | Positive | synthesis of fatty acid                    | 2.18E-04 | 83  |

|       |         |          |                                          |          |     |
|-------|---------|----------|------------------------------------------|----------|-----|
|       | hay     |          |                                          |          |     |
|       | Alfalfa |          |                                          |          |     |
| Rumen | hay     | Positive | abnormal morphology of body wall         | 2.18E-04 | 33  |
|       | Alfalfa |          |                                          |          |     |
| Rumen | hay     | Positive | depolarization of mitochondrial membrane | 2.25E-04 | 14  |
|       | Alfalfa |          |                                          |          |     |
| Rumen | hay     | Positive | morphology of blood vessel               | 2.25E-04 | 76  |
|       | Alfalfa |          |                                          |          |     |
| Rumen | hay     | Positive | infection by Retroviridae                | 2.27E-04 | 176 |
|       | Alfalfa |          |                                          |          |     |
| Rumen | hay     | Positive | apoptosis of embryonic cell lines        | 2.28E-04 | 52  |
|       | Alfalfa |          |                                          |          |     |
| Rumen | hay     | Positive | morphology of genital organ              | 2.28E-04 | 109 |
|       | Alfalfa |          |                                          |          |     |
| Rumen | hay     | Positive | mass of organism                         | 2.31E-04 | 88  |
|       | Alfalfa |          |                                          |          |     |
| Rumen | hay     | Positive | transport of L-amino acid                | 2.31E-04 | 23  |
|       | Alfalfa |          |                                          |          |     |
| Rumen | hay     | Positive | demyelination                            | 2.37E-04 | 37  |
|       | Alfalfa |          |                                          |          |     |
| Rumen | hay     | Positive | transport of sterol                      | 2.39E-04 | 39  |
|       | Alfalfa |          |                                          |          |     |
| Rumen | hay     | Positive | proliferation of mononuclear leukocytes  | 2.40E-04 | 180 |
|       | Alfalfa |          |                                          |          |     |
| Rumen | hay     | Positive | binding of DNA                           | 2.47E-04 | 131 |
|       | Alfalfa |          |                                          |          |     |
| Rumen | hay     | Positive | apoptosis of breast cancer cell lines    | 2.47E-04 | 77  |
|       | Alfalfa |          |                                          |          |     |
| Rumen | hay     | Positive | depolarization of cellular membrane      | 2.55E-04 | 27  |
|       | Alfalfa |          |                                          |          |     |
| Rumen | hay     | Positive | metabolism of reactive oxygen species    | 2.62E-04 | 126 |
|       | Alfalfa |          |                                          |          |     |
| Rumen | hay     | Positive | abnormal morphology of digestive system  | 2.82E-04 | 136 |
|       | Alfalfa |          |                                          |          |     |
| Rumen | hay     | Positive | oral cavity carcinoma                    | 2.85E-04 | 55  |
|       | Alfalfa |          |                                          |          |     |
| Rumen | hay     | Positive | abnormal morphology of heart             | 2.88E-04 | 99  |
|       | Alfalfa |          |                                          |          |     |
| Rumen | hay     | Positive | cellular infiltration by leukocytes      | 2.88E-04 | 100 |
|       | Alfalfa |          |                                          |          |     |
| Rumen | hay     | Positive | concentration of sterol                  | 2.95E-04 | 81  |
|       | Alfalfa |          |                                          |          |     |
| Rumen | hay     | Positive | interphase                               | 3.08E-04 | 161 |
| Rumen | Alfalfa | Positive | growth of neurites                       | 3.08E-04 | 117 |

|       |         |          |                                        |          |     |
|-------|---------|----------|----------------------------------------|----------|-----|
|       | hay     |          |                                        |          |     |
|       | Alfalfa |          |                                        |          |     |
| Rumen | hay     | Positive | quantity of IgM                        | 3.21E-04 | 41  |
|       | Alfalfa |          |                                        |          |     |
| Rumen | hay     | Positive | targeting of protein                   | 3.29E-04 | 39  |
|       | Alfalfa |          |                                        |          |     |
| Rumen | hay     | Positive | urination disorder                     | 3.29E-04 | 77  |
|       | Alfalfa |          |                                        |          |     |
| Rumen | hay     | Positive | migration of tumor cell lines          | 3.39E-04 | 172 |
|       | Alfalfa |          |                                        |          |     |
| Rumen | hay     | Positive | behavior                               | 3.43E-04 | 234 |
|       | Alfalfa |          |                                        |          |     |
| Rumen | hay     | Positive | abnormal morphology of rib             | 3.52E-04 | 24  |
|       | Alfalfa |          |                                        |          |     |
| Rumen | hay     | Positive | secretory pathway                      | 3.60E-04 | 55  |
|       | Alfalfa |          |                                        |          |     |
| Rumen | hay     | Positive | concentration of cholesterol           | 3.60E-04 | 77  |
|       | Alfalfa |          |                                        |          |     |
| Rumen | hay     | Positive | growth of embryo                       | 3.67E-04 | 120 |
|       | Alfalfa |          |                                        |          |     |
| Rumen | hay     | Positive | activation of leukocytes               | 3.70E-04 | 170 |
|       | Alfalfa |          |                                        |          |     |
| Rumen | hay     | Positive | oral cancer                            | 3.70E-04 | 62  |
|       | Alfalfa |          |                                        |          |     |
| Rumen | hay     | Positive | abnormal morphology of rib cage        | 3.70E-04 | 29  |
|       | Alfalfa |          |                                        |          |     |
| Rumen | hay     | Positive | cell cycle progression                 | 3.80E-04 | 246 |
|       | Alfalfa |          |                                        |          |     |
| Rumen | hay     | Positive | transport of carboxylic acid           | 3.81E-04 | 36  |
|       | Alfalfa |          |                                        |          |     |
| Rumen | hay     | Positive | quantity of lymphatic system component | 3.87E-04 | 97  |
|       | Alfalfa |          |                                        |          |     |
| Rumen | hay     | Positive | dysgenesis                             | 3.89E-04 | 134 |
|       | Alfalfa |          |                                        |          |     |
| Rumen | hay     | Positive | metabolism of protein                  | 3.92E-04 | 230 |
|       | Alfalfa |          |                                        |          |     |
| Rumen | hay     | Positive | morphology of rib                      | 3.92E-04 | 25  |
|       | Alfalfa |          |                                        |          |     |
| Rumen | hay     | Positive | proliferation of embryonic cells       | 4.00E-04 | 67  |
|       | Alfalfa |          |                                        |          |     |
| Rumen | hay     | Positive | abnormal morphology of genital organ   | 4.08E-04 | 104 |
|       | Alfalfa |          |                                        |          |     |
| Rumen | hay     | Positive | transport of D-glucose                 | 4.10E-04 | 42  |
| Rumen | Alfalfa | Positive | colony formation of cells              | 4.24E-04 | 123 |



|       |         |          |                                          |          |     |
|-------|---------|----------|------------------------------------------|----------|-----|
|       | hay     |          |                                          |          |     |
|       | Alfalfa |          |                                          |          |     |
| Rumen | hay     | Positive | attachment of cells                      | 4.28E-04 | 40  |
|       | Alfalfa |          |                                          |          |     |
| Rumen | hay     | Positive | colony formation                         | 4.46E-04 | 133 |
|       | Alfalfa |          |                                          |          |     |
| Rumen | hay     | Positive | transport of glutamine family amino acid | 4.64E-04 | 20  |
|       | Alfalfa |          |                                          |          |     |
| Rumen | hay     | Positive | cartilage development                    | 4.78E-04 | 42  |
|       | Alfalfa |          |                                          |          |     |
| Rumen | hay     | Positive | binding of lymphatic system cells        | 4.97E-04 | 12  |
|       | Alfalfa |          |                                          |          |     |
| Rumen | hay     | Positive | cytopenia                                | 5.23E-04 | 78  |
|       | Alfalfa |          |                                          |          |     |
| Rumen | hay     | Positive | quantity of B lymphocytes                | 5.27E-04 | 89  |
|       | Alfalfa |          |                                          |          |     |
| Rumen | hay     | Positive | morphology of vesicles                   | 5.28E-04 | 14  |
|       | Alfalfa |          |                                          |          |     |
| Rumen | hay     | Positive | invasion of tissue                       | 5.33E-04 | 54  |
|       | Alfalfa |          |                                          |          |     |
| Rumen | hay     | Positive | autosomal dominant disease               | 5.76E-04 | 155 |
|       | Alfalfa |          |                                          |          |     |
| Rumen | hay     | Positive | apoptosis of cervical cancer cell lines  | 5.90E-04 | 74  |
|       | Alfalfa |          |                                          |          |     |
| Rumen | hay     | Positive | transport of cholesterol                 | 6.23E-04 | 37  |
|       | Alfalfa |          |                                          |          |     |
| Rumen | hay     | Positive | Hypoplasia                               | 6.23E-04 | 125 |
|       | Alfalfa |          |                                          |          |     |
| Rumen | hay     | Positive | morphology of connective tissue          | 6.23E-04 | 115 |
|       | Alfalfa |          |                                          |          |     |
| Rumen | hay     | Positive | long-term potentiation                   | 6.27E-04 | 65  |
|       | Alfalfa |          |                                          |          |     |
| Rumen | hay     | Positive | quantity of thymocytes                   | 6.27E-04 | 62  |
|       | Alfalfa |          |                                          |          |     |
| Rumen | hay     | Positive | quantity of carbohydrate                 | 6.27E-04 | 128 |
|       | Alfalfa |          |                                          |          |     |
| Rumen | hay     | Positive | morphology of axial skeleton             | 6.31E-04 | 55  |
|       | Alfalfa |          |                                          |          |     |
| Rumen | hay     | Positive | mitosis                                  | 6.31E-04 | 123 |
|       | Alfalfa |          |                                          |          |     |
| Rumen | hay     | Positive | synthesis of testosterone                | 6.44E-04 | 19  |
|       | Alfalfa |          |                                          |          |     |
| Rumen | hay     | Positive | abnormal morphology of blood vessel      | 6.44E-04 | 70  |
| Rumen | Alfalfa | Positive | transport of L-glutamic acid             | 6.62E-04 | 13  |

|       |         |          |                                           |          |     |
|-------|---------|----------|-------------------------------------------|----------|-----|
|       | hay     |          |                                           |          |     |
|       | Alfalfa |          |                                           |          |     |
| Rumen | hay     | Positive | development of cardiovascular tissue      | 6.63E-04 | 94  |
|       | Alfalfa |          |                                           |          |     |
| Rumen | hay     | Positive | infection of cells                        | 6.69E-04 | 190 |
|       | Alfalfa |          |                                           |          |     |
| Rumen | hay     | Positive | retinal degeneration                      | 6.72E-04 | 68  |
|       | Alfalfa |          |                                           |          |     |
| Rumen | hay     | Positive | differentiation of blood cells            | 6.89E-04 | 200 |
|       | Alfalfa |          |                                           |          |     |
| Rumen | hay     | Positive | length of cells                           | 7.02E-04 | 31  |
|       | Alfalfa |          |                                           |          |     |
| Rumen | hay     | Positive | proliferation of fibroblasts              | 7.16E-04 | 90  |
|       | Alfalfa |          |                                           |          |     |
| Rumen | hay     | Positive | transmembrane potential of mitochondria   | 7.23E-04 | 58  |
|       | Alfalfa |          |                                           |          |     |
| Rumen | hay     | Positive | growth of embryonic tissue                | 7.31E-04 | 72  |
|       | Alfalfa |          |                                           |          |     |
| Rumen | hay     | Positive | phosphorylation of protein                | 7.34E-04 | 176 |
|       | Alfalfa |          |                                           |          |     |
| Rumen | hay     | Positive | cognition                                 | 7.64E-04 | 113 |
|       | Alfalfa |          |                                           |          |     |
| Rumen | hay     | Positive | function of lymphocytes                   | 7.70E-04 | 87  |
|       | Alfalfa |          |                                           |          |     |
| Rumen | hay     | Positive | accumulation of sterol                    | 7.71E-04 | 23  |
|       | Alfalfa |          |                                           |          |     |
| Rumen | hay     | Positive | recruitment of neutrophils                | 7.78E-04 | 51  |
|       | Alfalfa |          |                                           |          |     |
| Rumen | hay     | Positive | abnormal morphology of axial skeleton     | 7.78E-04 | 53  |
|       | Alfalfa |          |                                           |          |     |
| Rumen | hay     | Positive | dysmyelination                            | 7.78E-04 | 39  |
|       | Alfalfa |          |                                           |          |     |
| Rumen | hay     | Positive | dyspnea                                   | 7.78E-04 | 39  |
|       | Alfalfa |          |                                           |          |     |
| Rumen | hay     | Positive | transactivation of RNA                    | 8.13E-04 | 133 |
|       | Alfalfa |          |                                           |          |     |
| Rumen | hay     | Positive | abnormal morphology of internal genitalia | 8.28E-04 | 89  |
|       | Alfalfa |          |                                           |          |     |
| Rumen | hay     | Positive | abnormal morphology of pulmonary alveolus | 8.45E-04 | 34  |
|       | Alfalfa |          |                                           |          |     |
| Rumen | hay     | Positive | hypersensitive reaction                   | 8.67E-04 | 107 |
|       | Alfalfa |          |                                           |          |     |
| Rumen | hay     | Positive | female genital tract serous cancer        | 8.72E-04 | 97  |
| Rumen | Alfalfa | Positive | mammary tumor                             | 8.72E-04 | 369 |

|       |         |          |                                              |          |     |
|-------|---------|----------|----------------------------------------------|----------|-----|
|       | hay     |          |                                              |          |     |
|       | Alfalfa |          |                                              |          |     |
| Rumen | hay     | Positive | transport of monovalent inorganic cation     | 8.81E-04 | 58  |
|       | Alfalfa |          |                                              |          |     |
| Rumen | hay     | Positive | concentration of phosphatidic acid           | 9.00E-04 | 39  |
|       | Alfalfa |          |                                              |          |     |
| Rumen | hay     | Positive | recruitment of phagocytes                    | 9.01E-04 | 65  |
|       | Alfalfa |          |                                              |          |     |
| Rumen | hay     | Positive | chemotaxis of cells                          | 9.24E-04 | 129 |
|       | Alfalfa |          |                                              |          |     |
| Rumen | hay     | Positive | infection by RNA virus                       | 9.27E-04 | 204 |
|       | Alfalfa |          |                                              |          |     |
| Rumen | hay     | Positive | quantity of lymphoid organ                   | 9.32E-04 | 79  |
|       | Alfalfa |          |                                              |          |     |
| Rumen | hay     | Positive | export of molecule                           | 9.99E-04 | 76  |
|       | Alfalfa |          |                                              |          |     |
| Rumen | hay     | Positive | synthesis of terpenoid                       | 1.06E-03 | 73  |
|       | Alfalfa |          |                                              |          |     |
| Rumen | hay     | Positive | congenital anomaly of musculoskeletal system | 1.07E-03 | 175 |
|       | Alfalfa |          |                                              |          |     |
| Rumen | hay     | Positive | apoptosis of connective tissue cells         | 1.10E-03 | 76  |
|       | Alfalfa |          |                                              |          |     |
| Rumen | hay     | Positive | infection by HIV-1                           | 1.10E-03 | 147 |
|       | Alfalfa |          |                                              |          |     |
| Rumen | hay     | Positive | flux of lipid                                | 1.10E-03 | 37  |
|       | Alfalfa |          |                                              |          |     |
| Rumen | hay     | Positive | differentiation of T lymphocytes             | 1.10E-03 | 95  |
|       | Alfalfa |          |                                              |          |     |
| Rumen | hay     | Positive | neurodegeneration of neurites                | 1.10E-03 | 28  |
|       | Alfalfa |          |                                              |          |     |
| Rumen | hay     | Positive | morphology of muscle                         | 1.13E-03 | 85  |
|       | Alfalfa |          |                                              |          |     |
| Rumen | hay     | Positive | B-cell leukemia                              | 1.16E-03 | 34  |
|       | Alfalfa |          |                                              |          |     |
| Rumen | hay     | Positive | transport of steroid                         | 1.17E-03 | 43  |
|       | Alfalfa |          |                                              |          |     |
| Rumen | hay     | Positive | cell movement of macrophages                 | 1.19E-03 | 69  |
|       | Alfalfa |          |                                              |          |     |
| Rumen | hay     | Positive | proliferation of muscle cells                | 1.19E-03 | 93  |
|       | Alfalfa |          |                                              |          |     |
| Rumen | hay     | Positive | formation of thymus gland                    | 1.20E-03 | 45  |
|       | Alfalfa |          |                                              |          |     |
| Rumen | hay     | Positive | transport of acidic amino acid               | 1.24E-03 | 16  |
| Rumen | Alfalfa | Positive | hypoplasia of organ                          | 1.25E-03 | 110 |

|       |         |          |                                       |          |     |
|-------|---------|----------|---------------------------------------|----------|-----|
|       | hay     |          |                                       |          |     |
|       | Alfalfa |          |                                       |          |     |
| Rumen | hay     | Positive | formation of leukocytes               | 1.26E-03 | 44  |
|       | Alfalfa |          |                                       |          |     |
| Rumen | hay     | Positive | quantity of macrophages               | 1.27E-03 | 54  |
|       | Alfalfa |          |                                       |          |     |
| Rumen | hay     | Positive | formation of reactive oxygen species  | 1.27E-03 | 27  |
|       | Alfalfa |          |                                       |          |     |
| Rumen | hay     | Positive | synthesis of nucleotide               | 1.29E-03 | 91  |
|       | Alfalfa |          |                                       |          |     |
| Rumen | hay     | Positive | Hypertrophy                           | 1.29E-03 | 116 |
|       | Alfalfa |          |                                       |          |     |
| Rumen | hay     | Positive | synthesis of carbohydrate             | 1.32E-03 | 105 |
|       | Alfalfa |          |                                       |          |     |
| Rumen | hay     | Positive | stress response of cells              | 1.37E-03 | 39  |
|       | Alfalfa |          |                                       |          |     |
| Rumen | hay     | Positive | differentiation of epithelial tissue  | 1.40E-03 | 90  |
|       | Alfalfa |          |                                       |          |     |
| Rumen | hay     | Positive | cytostasis of tumor cell lines        | 1.43E-03 | 44  |
|       | Alfalfa |          |                                       |          |     |
| Rumen | hay     | Positive | neurotransmission                     | 1.47E-03 | 102 |
|       | Alfalfa |          |                                       |          |     |
| Rumen | hay     | Positive | relaxation of muscle                  | 1.48E-03 | 26  |
|       | Alfalfa |          |                                       |          |     |
| Rumen | hay     | Positive | chronic B-cell leukemia               | 1.50E-03 | 23  |
|       | Alfalfa |          |                                       |          |     |
| Rumen | hay     | Positive | formation of lymphocytes              | 1.50E-03 | 36  |
|       | Alfalfa |          |                                       |          |     |
| Rumen | hay     | Positive | cell death of kidney cell lines       | 1.52E-03 | 77  |
|       | Alfalfa |          |                                       |          |     |
| Rumen | hay     | Positive | concentration of choline-phospholipid | 1.53E-03 | 18  |
|       | Alfalfa |          |                                       |          |     |
| Rumen | hay     | Positive | secretion of molecule                 | 1.53E-03 | 133 |
|       | Alfalfa |          |                                       |          |     |
| Rumen | hay     | Positive | serous neoplasm                       | 1.53E-03 | 146 |
|       | Alfalfa |          |                                       |          |     |
| Rumen | hay     | Positive | function of smooth muscle             | 1.57E-03 | 28  |
|       | Alfalfa |          |                                       |          |     |
| Rumen | hay     | Positive | hepatocellular carcinoma              | 1.59E-03 | 892 |
|       | Alfalfa |          |                                       |          |     |
| Rumen | hay     | Positive | function of cardiovascular system     | 1.59E-03 | 92  |
|       | Alfalfa |          |                                       |          |     |
| Rumen | hay     | Positive | binding of endothelial cells          | 1.61E-03 | 31  |
| Rumen | Alfalfa | Positive | repair of DNA                         | 1.61E-03 | 74  |

|       |         |          |                                       |          |     |
|-------|---------|----------|---------------------------------------|----------|-----|
|       | hay     |          |                                       |          |     |
|       | Alfalfa |          |                                       |          |     |
| Rumen | hay     | Positive | recruitment of cells                  | 1.61E-03 | 89  |
|       | Alfalfa |          |                                       |          |     |
| Rumen | hay     | Positive | congenital malformation of skeleton   | 1.61E-03 | 104 |
|       | Alfalfa |          |                                       |          |     |
| Rumen | hay     | Positive | formation of mononuclear leukocytes   | 1.66E-03 | 37  |
|       | Alfalfa |          |                                       |          |     |
| Rumen | hay     | Positive | necroptosis of fibroblast cell lines  | 1.67E-03 | 22  |
|       | Alfalfa |          |                                       |          |     |
| Rumen | hay     | Positive | cell movement of granulocytes         | 1.70E-03 | 92  |
|       | Alfalfa |          |                                       |          |     |
| Rumen | hay     | Positive | migration of muscle cells             | 1.70E-03 | 45  |
|       | Alfalfa |          |                                       |          |     |
| Rumen | hay     | Positive | abnormal morphology of nervous system | 1.70E-03 | 171 |
|       | Alfalfa |          |                                       |          |     |
| Rumen | hay     | Positive | development of endothelial tissue     | 1.70E-03 | 91  |
|       | Alfalfa |          |                                       |          |     |
| Rumen | hay     | Positive | bone mineral density                  | 1.70E-03 | 47  |
|       | Alfalfa |          |                                       |          |     |
| Rumen | hay     | Positive | efflux of lipid                       | 1.74E-03 | 35  |
|       | Alfalfa |          |                                       |          |     |
| Rumen | hay     | Positive | metabolism of nucleoside triphosphate | 1.75E-03 | 39  |
|       | Alfalfa |          |                                       |          |     |
| Rumen | hay     | Positive | dephosphorylation of protein          | 1.78E-03 | 50  |
|       | Alfalfa |          |                                       |          |     |
| Rumen | hay     | Positive | cell movement of phagocytes           | 1.83E-03 | 132 |
|       | Alfalfa |          |                                       |          |     |
| Rumen | hay     | Positive | survival of organism                  | 1.83E-03 | 166 |
|       | Alfalfa |          |                                       |          |     |
| Rumen | hay     | Positive | organization of nucleus               | 1.84E-03 | 32  |
|       | Alfalfa |          |                                       |          |     |
| Rumen | hay     | Positive | abnormal morphology of jaw            | 1.85E-03 | 29  |
|       | Alfalfa |          |                                       |          |     |
| Rumen | hay     | Positive | recruitment of macrophages            | 1.85E-03 | 31  |
|       | Alfalfa |          |                                       |          |     |
| Rumen | hay     | Positive | synthesis of cholesterol              | 1.85E-03 | 21  |
|       | Alfalfa |          |                                       |          |     |
| Rumen | hay     | Positive | cell death of kidney cells            | 1.85E-03 | 87  |
|       | Alfalfa |          |                                       |          |     |
| Rumen | hay     | Positive | cellular infiltration                 | 1.85E-03 | 107 |
|       | Alfalfa |          |                                       |          |     |
| Rumen | hay     | Positive | transmigration of cells               | 1.85E-03 | 43  |
| Rumen | Alfalfa | Positive | morphology of vertebral column        | 1.88E-03 | 40  |

|       |         |          |                                              |          |     |
|-------|---------|----------|----------------------------------------------|----------|-----|
|       | hay     |          |                                              |          |     |
|       | Alfalfa |          |                                              |          |     |
| Rumen | hay     | Positive | development of genitourinary system          | 1.88E-03 | 206 |
|       | Alfalfa |          |                                              |          |     |
| Rumen | hay     | Positive | binding of blood vessel                      | 1.88E-03 | 8   |
|       | Alfalfa |          |                                              |          |     |
| Rumen | hay     | Positive | invasion of cells                            | 1.92E-03 | 202 |
|       | Alfalfa |          |                                              |          |     |
| Rumen | hay     | Positive | activation of lymphocytes                    | 1.93E-03 | 112 |
|       | Alfalfa |          |                                              |          |     |
| Rumen | hay     | Positive | locally advanced carcinoma                   | 1.93E-03 | 9   |
|       | Alfalfa |          |                                              |          |     |
| Rumen | hay     | Positive | morphology of skeleton                       | 1.95E-03 | 71  |
|       | Alfalfa |          |                                              |          |     |
| Rumen | hay     | Positive | development of hematopoietic system          | 1.96E-03 | 64  |
|       | Alfalfa |          |                                              |          |     |
| Rumen | hay     | Positive | breast or ovarian cancer                     | 1.99E-03 | 422 |
|       | Alfalfa |          |                                              |          |     |
| Rumen | hay     | Positive | cell movement of neutrophils                 | 1.99E-03 | 75  |
|       | Alfalfa |          |                                              |          |     |
| Rumen | hay     | Positive | arrest in mitosis of tumor cell lines        | 1.99E-03 | 22  |
|       | Alfalfa |          |                                              |          |     |
| Rumen | hay     | Positive | cell viability of cerebral cortex cells      | 1.99E-03 | 22  |
|       | Alfalfa |          |                                              |          |     |
| Rumen | hay     | Positive | hepatobiliary system cancer                  | 2.02E-03 | 922 |
|       | Alfalfa |          |                                              |          |     |
| Rumen | hay     | Positive | quantity of epinephrine                      | 2.04E-03 | 17  |
|       | Alfalfa |          |                                              |          |     |
| Rumen | hay     | Positive | apoptosis of endothelial cells               | 2.04E-03 | 49  |
|       | Alfalfa |          |                                              |          |     |
| Rumen | hay     | Positive | chronic myeloproliferative disorder          | 2.05E-03 | 43  |
|       | Alfalfa |          |                                              |          |     |
| Rumen | hay     | Positive | abnormal morphology of skeleton              | 2.06E-03 | 69  |
|       | Alfalfa |          |                                              |          |     |
| Rumen | hay     | Positive | apoptosis of dermal cells                    | 2.07E-03 | 27  |
|       | Alfalfa |          |                                              |          |     |
| Rumen | hay     | Positive | apoptosis of cerebral cortex cells           | 2.09E-03 | 31  |
|       | Alfalfa |          |                                              |          |     |
| Rumen | hay     | Positive | apoptosis of skin                            | 2.09E-03 | 28  |
|       | Alfalfa |          |                                              |          |     |
| Rumen | hay     | Positive | cell death of hematopoietic progenitor cells | 2.09E-03 | 59  |
|       | Alfalfa |          |                                              |          |     |
| Rumen | hay     | Positive | morphology of nervous system                 | 2.09E-03 | 183 |
| Rumen | Alfalfa | Positive | stimulation of hepatoma cell lines           | 2.09E-03 | 6   |

|       |         |          |                                          |          |     |
|-------|---------|----------|------------------------------------------|----------|-----|
|       | hay     |          |                                          |          |     |
|       | Alfalfa |          |                                          |          |     |
| Rumen | hay     | Positive | morphology of jaw                        | 2.09E-03 | 30  |
|       | Alfalfa |          |                                          |          |     |
| Rumen | hay     | Positive | attachment of tumor cell lines           | 2.11E-03 | 16  |
|       | Alfalfa |          |                                          |          |     |
| Rumen | hay     | Positive | generation of lymphocytes                | 2.17E-03 | 39  |
|       | Alfalfa |          |                                          |          |     |
| Rumen | hay     | Positive | learning                                 | 2.17E-03 | 102 |
|       | Alfalfa |          |                                          |          |     |
| Rumen | hay     | Positive | apoptosis of neurons                     | 2.19E-03 | 106 |
|       | Alfalfa |          |                                          |          |     |
| Rumen | hay     | Positive | craniofacial abnormality                 | 2.19E-03 | 88  |
|       | Alfalfa |          |                                          |          |     |
| Rumen | hay     | Positive | quantity of natural killer T lymphocytes | 2.21E-03 | 21  |
|       | Alfalfa |          |                                          |          |     |
| Rumen | hay     | Positive | abnormal morphology of adipose tissue    | 2.27E-03 | 34  |
|       | Alfalfa |          |                                          |          |     |
| Rumen | hay     | Positive | recruitment of myeloid cells             | 2.28E-03 | 59  |
|       | Alfalfa |          |                                          |          |     |
| Rumen | hay     | Positive | internalization of lipid                 | 2.29E-03 | 11  |
|       | Alfalfa |          |                                          |          |     |
| Rumen | hay     | Positive | liver cancer                             | 2.31E-03 | 917 |
|       | Alfalfa |          |                                          |          |     |
| Rumen | hay     | Positive | cell death of embryonic cells            | 2.31E-03 | 33  |
|       | Alfalfa |          |                                          |          |     |
| Rumen | hay     | Positive | metabolism of membrane lipid derivative  | 2.36E-03 | 95  |
|       | Alfalfa |          |                                          |          |     |
| Rumen | hay     | Positive | cell death of hematopoietic cells        | 2.36E-03 | 61  |
|       | Alfalfa |          |                                          |          |     |
| Rumen | hay     | Positive | function of muscle                       | 2.37E-03 | 86  |
|       | Alfalfa |          |                                          |          |     |
| Rumen | hay     | Positive | accumulation of triacylglycerol          | 2.42E-03 | 27  |
|       | Alfalfa |          |                                          |          |     |
| Rumen | hay     | Positive | autophagy                                | 2.42E-03 | 92  |
|       | Alfalfa |          |                                          |          |     |
| Rumen | hay     | Positive | cell tethering or rolling                | 2.44E-03 | 29  |
|       | Alfalfa |          |                                          |          |     |
| Rumen | hay     | Positive | morphology of endothelial cells          | 2.47E-03 | 20  |
|       | Alfalfa |          |                                          |          |     |
| Rumen | hay     | Positive | quantity of subcutaneous fat             | 2.47E-03 | 20  |
|       | Alfalfa |          |                                          |          |     |
| Rumen | hay     | Positive | metabolism of sphingolipid               | 2.54E-03 | 38  |
| Rumen | Alfalfa | Positive | autophagy of cells                       | 2.54E-03 | 67  |

|       |         |          |                                      |          |      |
|-------|---------|----------|--------------------------------------|----------|------|
|       | hay     |          |                                      |          |      |
|       | Alfalfa |          |                                      |          |      |
| Rumen | hay     | Positive | cell death of fibroblasts            | 2.54E-03 | 67   |
|       | Alfalfa |          |                                      |          |      |
| Rumen | hay     | Positive | exocytosis                           | 2.56E-03 | 50   |
|       | Alfalfa |          |                                      |          |      |
| Rumen | hay     | Positive | proliferation of T lymphocytes       | 2.57E-03 | 143  |
|       | Alfalfa |          |                                      |          |      |
| Rumen | hay     | Positive | differentiation of epithelial cells  | 2.63E-03 | 78   |
|       | Alfalfa |          |                                      |          |      |
| Rumen | hay     | Positive | outgrowth of cells                   | 2.65E-03 | 105  |
|       | Alfalfa |          |                                      |          |      |
| Rumen | hay     | Positive | hyperplasia of tissue                | 2.66E-03 | 51   |
|       | Alfalfa |          |                                      |          |      |
| Rumen | hay     | Positive | transport of long chain fatty acid   | 2.66E-03 | 12   |
|       | Alfalfa |          |                                      |          |      |
| Rumen | hay     | Positive | G1 phase                             | 2.66E-03 | 95   |
|       | Alfalfa |          |                                      |          |      |
| Rumen | hay     | Positive | breast or colorectal cancer          | 2.66E-03 | 1047 |
|       | Alfalfa |          |                                      |          |      |
| Rumen | hay     | Positive | synthesis of sphingolipid            | 2.71E-03 | 32   |
|       | Alfalfa |          |                                      |          |      |
| Rumen | hay     | Positive | quantity of hematopoietic cells      | 2.71E-03 | 107  |
|       | Alfalfa |          |                                      |          |      |
| Rumen | hay     | Positive | metabolism of peptide                | 2.71E-03 | 49   |
|       | Alfalfa |          |                                      |          |      |
| Rumen | hay     | Positive | maturation of cells                  | 2.73E-03 | 110  |
|       | Alfalfa |          |                                      |          |      |
| Rumen | hay     | Positive | activation of mononuclear leukocytes | 2.76E-03 | 116  |
|       | Alfalfa |          |                                      |          |      |
| Rumen | hay     | Positive | length of neurons                    | 2.78E-03 | 26   |
|       | Alfalfa |          |                                      |          |      |
| Rumen | hay     | Positive | Dermatitis                           | 2.78E-03 | 105  |
|       | Alfalfa |          |                                      |          |      |
| Rumen | hay     | Positive | cell death of skin                   | 2.78E-03 | 30   |
|       | Alfalfa |          |                                      |          |      |
| Rumen | hay     | Positive | liver lesion                         | 2.78E-03 | 922  |
|       | Alfalfa |          |                                      |          |      |
| Rumen | hay     | Positive | accumulation of acylglycerol         | 2.81E-03 | 28   |
|       | Alfalfa |          |                                      |          |      |
| Rumen | hay     | Positive | outgrowth of neurons                 | 2.84E-03 | 99   |
|       | Alfalfa |          |                                      |          |      |
| Rumen | hay     | Positive | abnormal morphology of lung          | 2.87E-03 | 48   |
| Rumen | Alfalfa | Positive | apoptosis of hippocampus             | 2.89E-03 | 14   |



|       |         |          |                                             |          |     |
|-------|---------|----------|---------------------------------------------|----------|-----|
|       | hay     |          |                                             |          |     |
|       | Alfalfa |          |                                             |          |     |
| Rumen | hay     | Positive | synthesis of DNA                            | 2.94E-03 | 101 |
|       | Alfalfa |          |                                             |          |     |
| Rumen | hay     | Positive | neoplasia of lymphoid organ                 | 2.94E-03 | 42  |
|       | Alfalfa |          |                                             |          |     |
| Rumen | hay     | Positive | syndromic mental retardation                | 2.94E-03 | 42  |
|       | Alfalfa |          |                                             |          |     |
| Rumen | hay     | Positive | morphology of mouth                         | 2.95E-03 | 37  |
|       | Alfalfa |          |                                             |          |     |
| Rumen | hay     | Positive | liver tumor                                 | 2.95E-03 | 921 |
|       | Alfalfa |          |                                             |          |     |
| Rumen | hay     | Positive | morphology of capillary vessel              | 2.99E-03 | 18  |
|       | Alfalfa |          |                                             |          |     |
| Rumen | hay     | Positive | accumulation of cholesterol                 | 3.00E-03 | 20  |
|       | Alfalfa |          |                                             |          |     |
| Rumen | hay     | Positive | outgrowth of neurites                       | 3.05E-03 | 98  |
|       | Alfalfa |          |                                             |          |     |
| Rumen | hay     | Positive | synthesis of steroid                        | 3.15E-03 | 65  |
|       | Alfalfa |          |                                             |          |     |
| Rumen | hay     | Positive | efflux of sterol                            | 3.15E-03 | 31  |
|       | Alfalfa |          |                                             |          |     |
| Rumen | hay     | Positive | necrosis of kidney                          | 3.20E-03 | 89  |
|       | Alfalfa |          |                                             |          |     |
| Rumen | hay     | Positive | psoriatic arthritis                         | 3.22E-03 | 25  |
|       | Alfalfa |          |                                             |          |     |
| Rumen | hay     | Positive | vascularization                             | 3.23E-03 | 60  |
|       | Alfalfa |          |                                             |          |     |
| Rumen | hay     | Positive | cardiogenesis                               | 3.23E-03 | 113 |
|       | Alfalfa |          |                                             |          |     |
| Rumen | hay     | Positive | cell death of embryonic cell lines          | 3.27E-03 | 61  |
|       | Alfalfa |          |                                             |          |     |
| Rumen | hay     | Positive | proliferation of lymphatic system cells     | 3.27E-03 | 52  |
|       | Alfalfa |          |                                             |          |     |
| Rumen | hay     | Positive | morphology of lung                          | 3.27E-03 | 49  |
|       | Alfalfa |          |                                             |          |     |
| Rumen | hay     | Positive | morphology of gonad                         | 3.28E-03 | 92  |
|       | Alfalfa |          |                                             |          |     |
| Rumen | hay     | Positive | apoptosis of neuroblastoma cell lines       | 3.29E-03 | 34  |
|       | Alfalfa |          |                                             |          |     |
| Rumen | hay     | Positive | concentration of ATP                        | 3.29E-03 | 34  |
|       | Alfalfa |          |                                             |          |     |
| Rumen | hay     | Positive | abnormal morphology of vertebrae            | 3.31E-03 | 37  |
| Rumen | Alfalfa | Positive | abnormal morphology of hepatobiliary system | 3.33E-03 | 53  |

|       |         |          |                                            |          |     |
|-------|---------|----------|--------------------------------------------|----------|-----|
|       | hay     |          |                                            |          |     |
|       | Alfalfa |          |                                            |          |     |
| Rumen | hay     | Positive | morphology of vessel component             | 3.35E-03 | 19  |
|       | Alfalfa |          |                                            |          |     |
| Rumen | hay     | Positive | morphology of heart ventricle              | 3.36E-03 | 50  |
|       | Alfalfa |          |                                            |          |     |
| Rumen | hay     | Positive | ataxia                                     | 3.36E-03 | 65  |
|       | Alfalfa |          |                                            |          |     |
| Rumen | hay     | Positive | quantity of hematopoietic progenitor cells | 3.41E-03 | 106 |
|       | Alfalfa |          |                                            |          |     |
| Rumen | hay     | Positive | development of digestive system            | 3.43E-03 | 93  |
|       | Alfalfa |          |                                            |          |     |
| Rumen | hay     | Positive | degeneration of central nervous system     | 3.44E-03 | 36  |
|       | Alfalfa |          |                                            |          |     |
| Rumen | hay     | Positive | cell death of endothelial cells            | 3.57E-03 | 52  |
|       | Alfalfa |          |                                            |          |     |
| Rumen | hay     | Positive | abnormal morphology of vertebral column    | 3.57E-03 | 38  |
|       | Alfalfa |          |                                            |          |     |
| Rumen | hay     | Positive | concentration of acylglycerol              | 3.58E-03 | 82  |
|       | Alfalfa |          |                                            |          |     |
| Rumen | hay     | Positive | production of reactive oxygen species      | 3.58E-03 | 89  |
|       | Alfalfa |          |                                            |          |     |
| Rumen | hay     | Positive | angiogenesis of lesion                     | 3.58E-03 | 35  |
|       | Alfalfa |          |                                            |          |     |
| Rumen | hay     | Positive | concentration of Ca <sup>2+</sup>          | 3.58E-03 | 35  |
|       | Alfalfa |          |                                            |          |     |
| Rumen | hay     | Positive | coagulation                                | 3.70E-03 | 50  |
|       | Alfalfa |          |                                            |          |     |
| Rumen | hay     | Positive | apoptosis of hippocampal neurons           | 3.71E-03 | 12  |
|       | Alfalfa |          |                                            |          |     |
| Rumen | hay     | Positive | demyelination of spinal cord               | 3.71E-03 | 12  |
|       | Alfalfa |          |                                            |          |     |
| Rumen | hay     | Positive | cell death of dermal cells                 | 3.78E-03 | 28  |
|       | Alfalfa |          |                                            |          |     |
| Rumen | hay     | Positive | formation of blood cells                   | 3.81E-03 | 51  |
|       | Alfalfa |          |                                            |          |     |
| Rumen | hay     | Positive | recruitment of granulocytes                | 3.81E-03 | 55  |
|       | Alfalfa |          |                                            |          |     |
| Rumen | hay     | Positive | transport of lipid                         | 3.82E-03 | 61  |
|       | Alfalfa |          |                                            |          |     |
| Rumen | hay     | Positive | granulation tissue                         | 3.83E-03 | 14  |
|       | Alfalfa |          |                                            |          |     |
| Rumen | hay     | Positive | cognitive impairment                       | 3.84E-03 | 81  |
| Rumen | Alfalfa | Positive | metabolism of nucleotide                   | 3.87E-03 | 105 |

|       |         |          |                                           |          |     |
|-------|---------|----------|-------------------------------------------|----------|-----|
|       | hay     |          |                                           |          |     |
|       | Alfalfa |          |                                           |          |     |
| Rumen | hay     | Positive | activation of neuroglia                   | 3.88E-03 | 36  |
|       | Alfalfa |          |                                           |          |     |
| Rumen | hay     | Positive | metabolism of DNA                         | 3.96E-03 | 96  |
|       | Alfalfa |          |                                           |          |     |
| Rumen | hay     | Positive | morphology of lymphatic system component  | 3.96E-03 | 100 |
|       | Alfalfa |          |                                           |          |     |
| Rumen | hay     | Positive | mental retardation                        | 4.06E-03 | 59  |
|       | Alfalfa |          |                                           |          |     |
| Rumen | hay     | Positive | cell movement of muscle cells             | 4.06E-03 | 47  |
|       | Alfalfa |          |                                           |          |     |
| Rumen | hay     | Positive | abnormal morphology of embryonic tissue   | 4.17E-03 | 129 |
|       | Alfalfa |          |                                           |          |     |
| Rumen | hay     | Positive | uptake of 2-deoxyglucose                  | 4.24E-03 | 30  |
|       | Alfalfa |          |                                           |          |     |
| Rumen | hay     | Positive | atelectasis                               | 4.30E-03 | 23  |
|       | Alfalfa |          |                                           |          |     |
| Rumen | hay     | Positive | midline defect                            | 4.31E-03 | 66  |
|       | Alfalfa |          |                                           |          |     |
| Rumen | hay     | Positive | remodeling of bone                        | 4.37E-03 | 49  |
|       | Alfalfa |          |                                           |          |     |
| Rumen | hay     | Positive | apoptosis of vascular endothelial cells   | 4.39E-03 | 28  |
|       | Alfalfa |          |                                           |          |     |
| Rumen | hay     | Positive | mitosis of cervical cancer cell lines     | 4.39E-03 | 28  |
|       | Alfalfa |          |                                           |          |     |
| Rumen | hay     | Positive | quantity of glycosphingolipid             | 4.39E-03 | 28  |
|       | Alfalfa |          |                                           |          |     |
| Rumen | hay     | Positive | mitosis of tumor cell lines               | 4.40E-03 | 36  |
|       | Alfalfa |          |                                           |          |     |
| Rumen | hay     | Positive | angiogenesis of tumor                     | 4.40E-03 | 33  |
|       | Alfalfa |          |                                           |          |     |
| Rumen | hay     | Positive | neurodegeneration of axons                | 4.41E-03 | 25  |
|       | Alfalfa |          |                                           |          |     |
| Rumen | hay     | Positive | quantity of IL-6 in blood                 | 4.41E-03 | 25  |
|       | Alfalfa |          |                                           |          |     |
| Rumen | hay     | Positive | B-cell lymphoproliferative disorder       | 4.46E-03 | 96  |
|       | Alfalfa |          |                                           |          |     |
| Rumen | hay     | Positive | abnormal morphology of endothelial tissue | 4.46E-03 | 20  |
|       | Alfalfa |          |                                           |          |     |
| Rumen | hay     | Positive | formation of T lymphocytes                | 4.55E-03 | 32  |
|       | Alfalfa |          |                                           |          |     |
| Rumen | hay     | Positive | abnormal morphology of gonad              | 4.69E-03 | 88  |
| Rumen | Alfalfa | Positive | development of reproductive system        | 4.69E-03 | 170 |

|       |         |          |                                                |          |     |
|-------|---------|----------|------------------------------------------------|----------|-----|
|       | hay     |          |                                                |          |     |
|       | Alfalfa |          |                                                |          |     |
| Rumen | hay     | Positive | cell movement of leukemia cell lines           | 4.73E-03 | 37  |
|       | Alfalfa |          |                                                |          |     |
| Rumen | hay     | Positive | bleeding of brain                              | 4.75E-03 | 21  |
|       | Alfalfa |          |                                                |          |     |
| Rumen | hay     | Positive | recruitment of leukocytes                      | 4.80E-03 | 79  |
|       | Alfalfa |          |                                                |          |     |
| Rumen | hay     | Positive | concentration of phosphatidylcholine           | 4.83E-03 | 15  |
|       | Alfalfa |          |                                                |          |     |
| Rumen | hay     | Positive | movement of mesenchymal stem cells             | 4.90E-03 | 11  |
|       | Alfalfa |          |                                                |          |     |
| Rumen | hay     | Positive | branching of cells                             | 4.94E-03 | 89  |
|       | Alfalfa |          |                                                |          |     |
| Rumen | hay     | Positive | binding of guanosine 5'-O-(3-thiotriphosphate) | 4.96E-03 | 22  |
|       | Alfalfa |          |                                                |          |     |
| Rumen | hay     | Positive | delayed hypersensitive reaction                | 4.96E-03 | 36  |
|       | Alfalfa |          |                                                |          |     |
| Rumen | hay     | Positive | recruitment of antigen presenting cells        | 5.01E-03 | 33  |
|       | Alfalfa |          | metabolism of nucleic acid component or        |          |     |
| Rumen | hay     | Positive | derivative                                     | 5.09E-03 | 122 |
|       | Alfalfa |          |                                                |          |     |
| Rumen | hay     | Positive | recruitment of blood cells                     | 5.09E-03 | 80  |
|       | Alfalfa |          |                                                |          |     |
| Rumen | hay     | Positive | I-kappaB kinase/NF-kappaB cascade              | 5.10E-03 | 45  |
|       | Alfalfa |          |                                                |          |     |
| Rumen | hay     | Positive | formation of plasma membrane projections       | 5.13E-03 | 139 |
|       | Alfalfa |          |                                                |          |     |
| Rumen | hay     | Positive | cell rolling of blood cells                    | 5.13E-03 | 24  |
|       | Alfalfa |          |                                                |          |     |
| Rumen | hay     | Positive | synthesis of sterol                            | 5.13E-03 | 24  |
|       | Alfalfa |          |                                                |          |     |
| Rumen | hay     | Positive | binding of hematopoietic progenitor cells      | 5.13E-03 | 9   |
|       | Alfalfa |          | gap junctional intercellular communication of  |          |     |
| Rumen | hay     | Positive | cells                                          | 5.13E-03 | 9   |
|       | Alfalfa |          |                                                |          |     |
| Rumen | hay     | Positive | abnormal morphology of capillary vessel        | 5.13E-03 | 17  |
|       | Alfalfa |          |                                                |          |     |
| Rumen | hay     | Positive | cell death of pericytes                        | 5.14E-03 | 12  |
|       | Alfalfa |          |                                                |          |     |
| Rumen | hay     | Positive | apoptosis of epidermal cells                   | 5.14E-03 | 25  |
|       | Alfalfa |          |                                                |          |     |
| Rumen | hay     | Positive | Ovarian Cancer and Tumors                      | 5.15E-03 | 174 |
| Rumen | Alfalfa | Positive | metabolism of amino acids                      | 5.15E-03 | 43  |

|       |         |          |                                                |          |      |
|-------|---------|----------|------------------------------------------------|----------|------|
|       | hay     |          |                                                |          |      |
|       | Alfalfa |          |                                                |          |      |
| Rumen | hay     | Positive | apoptosis of heart cell lines                  | 5.16E-03 | 13   |
|       | Alfalfa |          |                                                |          |      |
| Rumen | hay     | Positive | synthesis of prostaglandin E2                  | 5.23E-03 | 37   |
|       | Alfalfa |          |                                                |          |      |
| Rumen | hay     | Positive | differentiation of embryonic tissue            | 5.26E-03 | 63   |
|       | Alfalfa |          |                                                |          |      |
| Rumen | hay     | Positive | size of lesion                                 | 5.26E-03 | 63   |
|       | Alfalfa |          |                                                |          |      |
| Rumen | hay     | Positive | steroid metabolism                             | 5.26E-03 | 63   |
|       | Alfalfa |          |                                                |          |      |
| Rumen | hay     | Positive | cell viability of central nervous system cells | 5.27E-03 | 31   |
|       | Alfalfa |          |                                                |          |      |
| Rumen | hay     | Positive | leukocytosis                                   | 5.27E-03 | 31   |
|       | Alfalfa |          |                                                |          |      |
| Rumen | hay     | Positive | replication of Human cytomegalovirus           | 5.33E-03 | 6    |
|       | Alfalfa |          |                                                |          |      |
| Rumen | hay     | Negative | proliferation of cells                         | 5.24E-25 | 1072 |
|       | Alfalfa |          |                                                |          |      |
| Rumen | hay     | Negative | cell death                                     | 2.81E-23 | 974  |
|       | Alfalfa |          |                                                |          |      |
| Rumen | hay     | Negative | cancer                                         | 2.67E-22 | 2716 |
|       | Alfalfa |          |                                                |          |      |
| Rumen | hay     | Negative | necrosis                                       | 5.55E-22 | 774  |
|       | Alfalfa |          |                                                |          |      |
| Rumen | hay     | Negative | malignant solid tumor                          | 3.41E-21 | 2681 |
|       | Alfalfa |          |                                                |          |      |
| Rumen | hay     | Negative | organismal death                               | 9.45E-21 | 722  |
|       | Alfalfa |          |                                                |          |      |
| Rumen | hay     | Negative | apoptosis                                      | 9.45E-21 | 785  |
|       | Alfalfa |          |                                                |          |      |
| Rumen | hay     | Negative | morbidity or mortality                         | 9.45E-21 | 730  |
|       | Alfalfa |          |                                                |          |      |
| Rumen | hay     | Negative | cellular homeostasis                           | 3.19E-18 | 483  |
|       | Alfalfa |          |                                                |          |      |
| Rumen | hay     | Negative | organization of cytoplasm                      | 1.99E-16 | 478  |
|       | Alfalfa |          |                                                |          |      |
| Rumen | hay     | Negative | morphology of cells                            | 2.51E-16 | 585  |
|       | Alfalfa |          |                                                |          |      |
| Rumen | hay     | Negative | cell movement                                  | 8.58E-16 | 629  |
|       | Alfalfa |          |                                                |          |      |
| Rumen | hay     | Negative | cell death of tumor cell lines                 | 8.91E-16 | 473  |
| Rumen | Alfalfa | Negative | quantity of cells                              | 2.68E-15 | 534  |

|       |         |          |                                              |          |     |
|-------|---------|----------|----------------------------------------------|----------|-----|
|       | hay     |          |                                              |          |     |
|       | Alfalfa |          |                                              |          |     |
| Rumen | hay     | Negative | morphology of cardiovascular system          | 2.91E-15 | 221 |
|       | Alfalfa |          |                                              |          |     |
| Rumen | hay     | Negative | cell survival                                | 5.52E-15 | 434 |
|       | Alfalfa |          |                                              |          |     |
| Rumen | hay     | Negative | apoptosis of tumor cell lines                | 7.08E-15 | 385 |
|       | Alfalfa |          |                                              |          |     |
| Rumen | hay     | Negative | expression of RNA                            | 8.42E-15 | 628 |
|       | Alfalfa |          |                                              |          |     |
| Rumen | hay     | Negative | cell viability                               | 9.98E-15 | 408 |
|       | Alfalfa |          |                                              |          |     |
| Rumen | hay     | Negative | migration of cells                           | 1.09E-14 | 565 |
|       | Alfalfa |          |                                              |          |     |
| Rumen | hay     | Negative | Movement Disorders                           | 5.71E-14 | 340 |
|       | Alfalfa |          |                                              |          |     |
| Rumen | hay     | Negative | transport of molecule                        | 9.98E-14 | 485 |
|       | Alfalfa |          |                                              |          |     |
| Rumen | hay     | Negative | transcription                                | 1.12E-13 | 583 |
|       | Alfalfa |          |                                              |          |     |
| Rumen | hay     | Negative | organization of cytoskeleton                 | 1.82E-13 | 427 |
|       | Alfalfa |          |                                              |          |     |
| Rumen | hay     | Negative | angiogenesis                                 | 1.88E-13 | 296 |
|       | Alfalfa |          |                                              |          |     |
| Rumen | hay     | Negative | development of vasculature                   | 3.99E-13 | 154 |
|       | Alfalfa |          |                                              |          |     |
| Rumen | hay     | Negative | transcription of RNA                         | 8.71E-13 | 543 |
|       | Alfalfa |          |                                              |          |     |
| Rumen | hay     | Negative | abnormal morphology of cardiovascular system | 1.01E-12 | 197 |
|       | Alfalfa |          |                                              |          |     |
| Rumen | hay     | Negative | microtubule dynamics                         | 1.35E-12 | 367 |
|       | Alfalfa |          |                                              |          |     |
| Rumen | hay     | Negative | disorder of basal ganglia                    | 1.85E-12 | 253 |
|       | Alfalfa |          |                                              |          |     |
| Rumen | hay     | Negative | vasculogenesis                               | 2.49E-12 | 244 |
|       | Alfalfa |          |                                              |          |     |
| Rumen | hay     | Negative | quantity of blood cells                      | 2.49E-12 | 324 |
|       | Alfalfa |          |                                              |          |     |
| Rumen | hay     | Negative | neuromuscular disease                        | 1.15E-11 | 282 |
|       | Alfalfa |          |                                              |          |     |
| Rumen | hay     | Negative | cell viability of tumor cell lines           | 1.27E-11 | 253 |
|       | Alfalfa |          |                                              |          |     |
| Rumen | hay     | Negative | dyskinesia                                   | 1.55E-11 | 207 |
| Rumen | Alfalfa | Negative | cell spreading                               | 1.79E-11 | 106 |

|       |         |          |                                           |          |      |
|-------|---------|----------|-------------------------------------------|----------|------|
|       | hay     |          |                                           |          |      |
|       | Alfalfa |          |                                           |          |      |
| Rumen | hay     | Negative | quantity of leukocytes                    | 1.79E-11 | 290  |
|       | Alfalfa |          |                                           |          |      |
| Rumen | hay     | Negative | neurological signs                        | 4.61E-11 | 215  |
|       | Alfalfa |          |                                           |          |      |
| Rumen | hay     | Negative | size of body                              | 6.01E-11 | 270  |
|       | Alfalfa |          |                                           |          |      |
| Rumen | hay     | Negative | formation of cellular protrusions         | 6.25E-11 | 284  |
|       | Alfalfa |          |                                           |          |      |
| Rumen | hay     | Negative | cell movement of tumor cell lines         | 6.38E-11 | 270  |
|       | Alfalfa |          |                                           |          |      |
| Rumen | hay     | Negative | Growth Failure                            | 8.31E-11 | 199  |
|       | Alfalfa |          |                                           |          |      |
| Rumen | hay     | Negative | morphology of vessel                      | 1.28E-10 | 113  |
|       | Alfalfa |          |                                           |          |      |
| Rumen | hay     | Negative | migration of tumor cell lines             | 1.94E-10 | 228  |
|       | Alfalfa |          |                                           |          |      |
| Rumen | hay     | Negative | tumorigenesis of tissue                   | 2.09E-10 | 2229 |
|       | Alfalfa |          |                                           |          |      |
| Rumen | hay     | Negative | epithelial cancer                         | 2.43E-10 | 2175 |
|       | Alfalfa |          |                                           |          |      |
| Rumen | hay     | Negative | development of body trunk                 | 2.61E-10 | 338  |
|       | Alfalfa |          |                                           |          |      |
| Rumen | hay     | Negative | neoplasia of epithelial tissue            | 2.61E-10 | 2194 |
|       | Alfalfa |          |                                           |          |      |
| Rumen | hay     | Negative | Huntington's Disease                      | 3.04E-10 | 190  |
|       | Alfalfa |          |                                           |          |      |
| Rumen | hay     | Negative | proliferation of neuronal cells           | 3.87E-10 | 190  |
|       | Alfalfa |          |                                           |          |      |
| Rumen | hay     | Negative | cell death of connective tissue cells     | 1.03E-09 | 196  |
|       | Alfalfa |          |                                           |          |      |
| Rumen | hay     | Negative | small GTPase mediated signal transduction | 1.04E-09 | 73   |
|       | Alfalfa |          |                                           |          |      |
| Rumen | hay     | Negative | morphology of blood vessel                | 1.14E-09 | 103  |
|       | Alfalfa |          |                                           |          |      |
| Rumen | hay     | Negative | ubiquitination                            | 1.33E-09 | 119  |
|       | Alfalfa |          |                                           |          |      |
| Rumen | hay     | Negative | neuronal cell death                       | 1.69E-09 | 217  |
|       | Alfalfa |          |                                           |          |      |
| Rumen | hay     | Negative | invasion of cells                         | 2.06E-09 | 268  |
|       | Alfalfa |          |                                           |          |      |
| Rumen | hay     | Negative | transcription of DNA                      | 2.06E-09 | 441  |
| Rumen | Alfalfa | Negative | abnormal morphology of thoracic cavity    | 2.26E-09 | 190  |

|       |         |          |                                          |          |     |
|-------|---------|----------|------------------------------------------|----------|-----|
|       | hay     |          |                                          |          |     |
|       | Alfalfa |          |                                          |          |     |
| Rumen | hay     | Negative | growth of organism                       | 3.23E-09 | 258 |
|       | Alfalfa |          |                                          |          |     |
| Rumen | hay     | Negative | Viral Infection                          | 3.59E-09 | 459 |
|       | Alfalfa |          |                                          |          |     |
| Rumen | hay     | Negative | seizure disorder                         | 4.03E-09 | 156 |
|       | Alfalfa |          |                                          |          |     |
| Rumen | hay     | Negative | colony formation of cells                | 4.78E-09 | 162 |
|       | Alfalfa |          |                                          |          |     |
| Rumen | hay     | Negative | necrosis of epithelial tissue            | 5.59E-09 | 189 |
|       | Alfalfa |          |                                          |          |     |
| Rumen | hay     | Negative | synthesis of lipid                       | 8.40E-09 | 223 |
|       | Alfalfa |          |                                          |          |     |
| Rumen | hay     | Negative | ubiquitination of protein                | 8.46E-09 | 115 |
|       | Alfalfa |          |                                          |          |     |
| Rumen | hay     | Negative | abnormal morphology of cells             | 9.35E-09 | 368 |
|       | Alfalfa |          |                                          |          |     |
| Rumen | hay     | Negative | morphology of heart                      | 1.11E-08 | 136 |
|       | Alfalfa |          |                                          |          |     |
| Rumen | hay     | Negative | proliferation of muscle cells            | 1.11E-08 | 126 |
|       | Alfalfa |          |                                          |          |     |
| Rumen | hay     | Negative | development of cytoplasm                 | 1.19E-08 | 152 |
|       | Alfalfa |          |                                          |          |     |
| Rumen | hay     | Negative | quantity of lymphocytes                  | 1.40E-08 | 220 |
|       | Alfalfa |          |                                          |          |     |
| Rumen | hay     | Negative | development of epithelial tissue         | 1.56E-08 | 167 |
|       | Alfalfa |          |                                          |          |     |
| Rumen | hay     | Negative | cell movement of blood cells             | 1.61E-08 | 265 |
|       | Alfalfa |          |                                          |          |     |
| Rumen | hay     | Negative | function of cardiovascular system        | 1.61E-08 | 125 |
|       | Alfalfa |          |                                          |          |     |
| Rumen | hay     | Negative | morphology of body cavity                | 1.93E-08 | 348 |
|       | Alfalfa |          |                                          |          |     |
| Rumen | hay     | Negative | migration of blood cells                 | 1.93E-08 | 264 |
|       | Alfalfa |          |                                          |          |     |
| Rumen | hay     | Negative | cell death of cervical cancer cell lines | 2.35E-08 | 119 |
|       | Alfalfa |          |                                          |          |     |
| Rumen | hay     | Negative | cell death of blood cells                | 2.44E-08 | 215 |
|       | Alfalfa |          |                                          |          |     |
| Rumen | hay     | Negative | abnormal morphology of blood vessel      | 2.47E-08 | 94  |
|       | Alfalfa |          |                                          |          |     |
| Rumen | hay     | Negative | leukocyte migration                      | 2.51E-08 | 263 |
| Rumen | Alfalfa | Negative | proliferation of tumor cell lines        | 2.59E-08 | 437 |



|       |         |          |                                          |          |      |
|-------|---------|----------|------------------------------------------|----------|------|
|       | hay     |          |                                          |          |      |
|       | Alfalfa |          |                                          |          |      |
| Rumen | hay     | Negative | transactivation                          | 2.79E-08 | 183  |
|       | Alfalfa |          |                                          |          |      |
| Rumen | hay     | Negative | quantity of mononuclear leukocytes       | 2.90E-08 | 226  |
|       | Alfalfa |          |                                          |          |      |
| Rumen | hay     | Negative | abdominal neoplasm                       | 3.50E-08 | 2159 |
|       | Alfalfa |          |                                          |          |      |
| Rumen | hay     | Negative | cell death of heart cells                | 3.96E-08 | 80   |
|       | Alfalfa |          |                                          |          |      |
| Rumen | hay     | Negative | cell death of heart                      | 4.99E-08 | 82   |
|       | Alfalfa |          |                                          |          |      |
| Rumen | hay     | Negative | apoptosis of neuroblastoma cell lines    | 5.48E-08 | 50   |
|       | Alfalfa |          |                                          |          |      |
| Rumen | hay     | Negative | cell death of immune cells               | 5.90E-08 | 204  |
|       | Alfalfa |          |                                          |          |      |
| Rumen | hay     | Negative | colony formation                         | 6.06E-08 | 170  |
|       | Alfalfa |          |                                          |          |      |
| Rumen | hay     | Negative | activation of cells                      | 6.06E-08 | 289  |
|       | Alfalfa |          |                                          |          |      |
| Rumen | hay     | Negative | inflammatory response                    | 6.36E-08 | 236  |
|       | Alfalfa |          |                                          |          |      |
| Rumen | hay     | Negative | epilepsy                                 | 6.36E-08 | 105  |
|       | Alfalfa |          |                                          |          |      |
| Rumen | hay     | Negative | degeneration of nervous system           | 6.36E-08 | 99   |
|       | Alfalfa |          |                                          |          |      |
| Rumen | hay     | Negative | autophagy                                | 7.64E-08 | 124  |
|       | Alfalfa |          |                                          |          |      |
| Rumen | hay     | Negative | Neurodegeneration                        | 8.68E-08 | 105  |
|       | Alfalfa |          |                                          |          |      |
| Rumen | hay     | Negative | cell death of neuroblastoma cell lines   | 9.09E-08 | 71   |
|       | Alfalfa |          |                                          |          |      |
| Rumen | hay     | Negative | abdominal cancer                         | 9.11E-08 | 2131 |
|       | Alfalfa |          |                                          |          |      |
| Rumen | hay     | Negative | perinatal death                          | 9.87E-08 | 185  |
|       | Alfalfa |          |                                          |          |      |
| Rumen | hay     | Negative | abnormal morphology of epithelial tissue | 9.93E-08 | 136  |
|       | Alfalfa |          |                                          |          |      |
| Rumen | hay     | Negative | Organ Degeneration                       | 9.93E-08 | 157  |
|       | Alfalfa |          |                                          |          |      |
| Rumen | hay     | Negative | endocytosis                              | 1.03E-07 | 115  |
|       | Alfalfa |          |                                          |          |      |
| Rumen | hay     | Negative | epileptic seizure                        | 1.14E-07 | 63   |
| Rumen | Alfalfa | Negative | growth of embryo                         | 1.27E-07 | 152  |

|       |         |          |                                              |          |     |
|-------|---------|----------|----------------------------------------------|----------|-----|
|       | hay     |          |                                              |          |     |
|       | Alfalfa |          |                                              |          |     |
| Rumen | hay     | Negative | seizures                                     | 1.35E-07 | 130 |
|       | Alfalfa |          |                                              |          |     |
| Rumen | hay     | Negative | migration of breast cancer cell lines        | 1.35E-07 | 86  |
|       | Alfalfa |          |                                              |          |     |
| Rumen | hay     | Negative | protein kinase cascade                       | 1.60E-07 | 136 |
|       | Alfalfa |          |                                              |          |     |
| Rumen | hay     | Negative | formation of cytoskeleton                    | 1.82E-07 | 123 |
|       | Alfalfa |          |                                              |          |     |
| Rumen | hay     | Negative | abnormal morphology of heart                 | 1.86E-07 | 125 |
|       | Alfalfa |          |                                              |          |     |
| Rumen | hay     | Negative | behavior                                     | 1.88E-07 | 289 |
|       | Alfalfa |          |                                              |          |     |
| Rumen | hay     | Negative | homing                                       | 1.95E-07 | 178 |
|       | Alfalfa |          |                                              |          |     |
| Rumen | hay     | Negative | development of cardiovascular tissue         | 1.96E-07 | 121 |
|       | Alfalfa |          |                                              |          |     |
| Rumen | hay     | Negative | growth of neurites                           | 1.97E-07 | 147 |
|       | Alfalfa |          |                                              |          |     |
| Rumen | hay     | Negative | growth of plasma membrane projections        | 2.21E-07 | 148 |
|       | Alfalfa |          |                                              |          |     |
| Rumen | hay     | Negative | cell viability of cervical cancer cell lines | 2.29E-07 | 78  |
|       | Alfalfa |          |                                              |          |     |
| Rumen | hay     | Negative | cell cycle progression                       | 2.64E-07 | 303 |
|       | Alfalfa |          |                                              |          |     |
| Rumen | hay     | Negative | abnormal morphology of body cavity           | 3.01E-07 | 327 |
|       | Alfalfa |          |                                              |          |     |
| Rumen | hay     | Negative | quantity of connective tissue                | 3.02E-07 | 185 |
|       | Alfalfa |          |                                              |          |     |
| Rumen | hay     | Negative | development of leukocytes                    | 3.27E-07 | 181 |
|       | Alfalfa |          |                                              |          |     |
| Rumen | hay     | Negative | cell movement of connective tissue cells     | 3.27E-07 | 78  |
|       | Alfalfa |          |                                              |          |     |
| Rumen | hay     | Negative | cell movement of leukocytes                  | 3.29E-07 | 229 |
|       | Alfalfa |          |                                              |          |     |
| Rumen | hay     | Negative | proliferation of connective tissue cells     | 3.48E-07 | 182 |
|       | Alfalfa |          |                                              |          |     |
| Rumen | hay     | Negative | development of endothelial tissue            | 3.53E-07 | 119 |
|       | Alfalfa |          |                                              |          |     |
| Rumen | hay     | Negative | proliferation of smooth muscle cells         | 3.78E-07 | 96  |
|       | Alfalfa |          |                                              |          |     |
| Rumen | hay     | Negative | differentiation of cells                     | 3.82E-07 | 602 |
| Rumen | Alfalfa | Negative | cell movement of breast cancer cell lines    | 3.90E-07 | 97  |

|       |         |          |                                          |          |      |
|-------|---------|----------|------------------------------------------|----------|------|
|       | hay     |          |                                          |          |      |
|       | Alfalfa |          |                                          |          |      |
| Rumen | hay     | Negative | cell death of epithelial cell lines      | 4.14E-07 | 95   |
|       | Alfalfa |          |                                          |          |      |
| Rumen | hay     | Negative | morphology of artery                     | 4.14E-07 | 58   |
|       | Alfalfa |          |                                          |          |      |
| Rumen | hay     | Negative | phosphorylation of protein               | 4.14E-07 | 220  |
|       | Alfalfa |          |                                          |          |      |
| Rumen | hay     | Negative | cell transformation                      | 4.67E-07 | 145  |
|       | Alfalfa |          |                                          |          |      |
| Rumen | hay     | Negative | cell movement of fibroblasts             | 4.77E-07 | 66   |
|       | Alfalfa |          |                                          |          |      |
| Rumen | hay     | Negative | cell death of cardiomyocytes             | 4.87E-07 | 75   |
|       | Alfalfa |          |                                          |          |      |
| Rumen | hay     | Negative | sprouting                                | 5.24E-07 | 124  |
|       | Alfalfa |          |                                          |          |      |
| Rumen | hay     | Negative | necrosis of cardiac muscle               | 5.30E-07 | 76   |
|       | Alfalfa |          |                                          |          |      |
| Rumen | hay     | Negative | digestive system cancer                  | 6.73E-07 | 1847 |
|       | Alfalfa |          |                                          |          |      |
| Rumen | hay     | Negative | homing of cells                          | 6.75E-07 | 171  |
|       | Alfalfa |          |                                          |          |      |
| Rumen | hay     | Negative | cell death of fibroblast cell lines      | 6.77E-07 | 135  |
|       | Alfalfa |          |                                          |          |      |
| Rumen | hay     | Negative | abnormal morphology of artery            | 7.05E-07 | 56   |
|       | Alfalfa |          |                                          |          |      |
| Rumen | hay     | Negative | transactivation of RNA                   | 7.17E-07 | 167  |
|       | Alfalfa |          |                                          |          |      |
| Rumen | hay     | Negative | synthesis of DNA                         | 7.56E-07 | 132  |
|       | Alfalfa |          |                                          |          |      |
| Rumen | hay     | Negative | outgrowth of plasma membrane projections | 8.56E-07 | 129  |
|       | Alfalfa |          |                                          |          |      |
| Rumen | hay     | Negative | cell movement of endothelial cells       | 8.81E-07 | 114  |
|       | Alfalfa |          |                                          |          |      |
| Rumen | hay     | Negative | digestive organ tumor                    | 8.98E-07 | 1862 |
|       | Alfalfa |          |                                          |          |      |
| Rumen | hay     | Negative | development of blood cells               | 9.20E-07 | 196  |
|       | Alfalfa |          |                                          |          |      |
| Rumen | hay     | Negative | apoptosis of heart cells                 | 9.20E-07 | 67   |
|       | Alfalfa |          |                                          |          |      |
| Rumen | hay     | Negative | formation of muscle                      | 9.20E-07 | 126  |
|       | Alfalfa |          |                                          |          |      |
| Rumen | hay     | Negative | fibrogenesis                             | 9.20E-07 | 130  |
| Rumen | Alfalfa | Negative | outgrowth of neurons                     | 9.20E-07 | 129  |

|       |         |          |                                         |          |     |
|-------|---------|----------|-----------------------------------------|----------|-----|
|       | hay     |          |                                         |          |     |
|       | Alfalfa |          |                                         |          |     |
| Rumen | hay     | Negative | outgrowth of neurites                   | 9.20E-07 | 128 |
|       | Alfalfa |          |                                         |          |     |
| Rumen | hay     | Negative | synthesis of nitric oxide               | 9.72E-07 | 92  |
|       | Alfalfa |          |                                         |          |     |
| Rumen | hay     | Negative | growth of epithelial tissue             | 1.06E-06 | 203 |
|       | Alfalfa |          |                                         |          |     |
| Rumen | hay     | Negative | metabolism of carbohydrate              | 1.14E-06 | 187 |
|       | Alfalfa |          |                                         |          |     |
| Rumen | hay     | Negative | cell movement of myeloid cells          | 1.16E-06 | 165 |
|       | Alfalfa |          |                                         |          |     |
| Rumen | hay     | Negative | cell death of epithelial cells          | 1.30E-06 | 153 |
|       | Alfalfa |          |                                         |          |     |
| Rumen | hay     | Negative | cell death of kidney cells              | 1.38E-06 | 112 |
|       | Alfalfa |          |                                         |          |     |
| Rumen | hay     | Negative | development of lymphatic system         | 1.39E-06 | 114 |
|       | Alfalfa |          |                                         |          |     |
| Rumen | hay     | Negative | cell death of carcinoma cell lines      | 1.39E-06 | 94  |
|       | Alfalfa |          |                                         |          |     |
| Rumen | hay     | Negative | concentration of lipid                  | 1.44E-06 | 237 |
|       | Alfalfa |          |                                         |          |     |
| Rumen | hay     | Negative | cell death of tumor                     | 1.44E-06 | 121 |
|       | Alfalfa |          |                                         |          |     |
| Rumen | hay     | Negative | endothelial cell development            | 1.55E-06 | 113 |
|       | Alfalfa |          |                                         |          |     |
| Rumen | hay     | Negative | necrosis of kidney                      | 1.58E-06 | 116 |
|       | Alfalfa |          |                                         |          |     |
| Rumen | hay     | Negative | quantity of T lymphocytes               | 1.58E-06 | 163 |
|       | Alfalfa |          |                                         |          |     |
| Rumen | hay     | Negative | outgrowth of cells                      | 1.73E-06 | 135 |
|       | Alfalfa |          |                                         |          |     |
| Rumen | hay     | Negative | apoptosis of blood cells                | 1.73E-06 | 152 |
|       | Alfalfa |          |                                         |          |     |
| Rumen | hay     | Negative | survival of organism                    | 1.73E-06 | 208 |
|       | Alfalfa |          |                                         |          |     |
| Rumen | hay     | Negative | apoptosis of epithelial cell lines      | 1.95E-06 | 76  |
|       | Alfalfa |          |                                         |          |     |
| Rumen | hay     | Negative | growth of connective tissue             | 1.96E-06 | 192 |
|       | Alfalfa |          |                                         |          |     |
| Rumen | hay     | Negative | cell viability of cerebral cortex cells | 1.98E-06 | 30  |
|       | Alfalfa |          |                                         |          |     |
| Rumen | hay     | Negative | necrosis of tumor                       | 1.99E-06 | 120 |
| Rumen | Alfalfa | Negative | chemotaxis                              | 2.20E-06 | 165 |

|       |         |          |                                            |          |     |
|-------|---------|----------|--------------------------------------------|----------|-----|
|       | hay     |          |                                            |          |     |
|       | Alfalfa |          |                                            |          |     |
| Rumen | hay     | Negative | fatty acid metabolism                      | 2.23E-06 | 180 |
|       | Alfalfa |          |                                            |          |     |
| Rumen | hay     | Negative | proliferation of embryonic stem cell lines | 2.29E-06 | 15  |
|       | Alfalfa |          |                                            |          |     |
| Rumen | hay     | Negative | proliferation of fibroblasts               | 2.44E-06 | 112 |
|       | Alfalfa |          |                                            |          |     |
| Rumen | hay     | Negative | function of blood cells                    | 2.44E-06 | 176 |
|       | Alfalfa |          |                                            |          |     |
| Rumen | hay     | Negative | recruitment of cells                       | 2.44E-06 | 113 |
|       | Alfalfa |          |                                            |          |     |
| Rumen | hay     | Negative | development of lymphocytes                 | 2.49E-06 | 167 |
|       | Alfalfa |          |                                            |          |     |
| Rumen | hay     | Negative | apoptosis of cervical cancer cell lines    | 2.52E-06 | 92  |
|       | Alfalfa |          |                                            |          |     |
| Rumen | hay     | Negative | development of mononuclear leukocytes      | 2.66E-06 | 168 |
|       | Alfalfa |          |                                            |          |     |
| Rumen | hay     | Negative | formation of cells                         | 2.71E-06 | 280 |
|       | Alfalfa |          |                                            |          |     |
| Rumen | hay     | Negative | formation of actin stress fibers           | 2.79E-06 | 80  |
|       | Alfalfa |          |                                            |          |     |
| Rumen | hay     | Negative | aggregation of cells                       | 2.82E-06 | 104 |
|       | Alfalfa |          |                                            |          |     |
| Rumen | hay     | Negative | secretion of molecule                      | 3.03E-06 | 166 |
|       | Alfalfa |          |                                            |          |     |
| Rumen | hay     | Negative | formation of filaments                     | 3.05E-06 | 124 |
|       | Alfalfa |          |                                            |          |     |
| Rumen | hay     | Negative | cellular infiltration                      | 3.12E-06 | 135 |
|       | Alfalfa |          |                                            |          |     |
| Rumen | hay     | Negative | cell death of breast cancer cell lines     | 3.26E-06 | 106 |
|       | Alfalfa |          |                                            |          |     |
| Rumen | hay     | Negative | function of leukocytes                     | 3.26E-06 | 162 |
|       | Alfalfa |          |                                            |          |     |
| Rumen | hay     | Negative | cell death of muscle                       | 3.31E-06 | 109 |
|       | Alfalfa |          |                                            |          |     |
| Rumen | hay     | Negative | apoptosis of cardiomyocytes                | 3.31E-06 | 64  |
|       | Alfalfa |          |                                            |          |     |
| Rumen | hay     | Negative | synthesis of fatty acid                    | 3.36E-06 | 100 |
|       | Alfalfa |          |                                            |          |     |
| Rumen | hay     | Negative | cellular infiltration by leukocytes        | 3.36E-06 | 121 |
|       | Alfalfa |          |                                            |          |     |
| Rumen | hay     | Negative | differentiation of leukocytes              | 3.57E-06 | 198 |
| Rumen | Alfalfa | Negative | invasion of tumor cell lines               | 3.78E-06 | 196 |

|       |         |          |                                         |          |     |
|-------|---------|----------|-----------------------------------------|----------|-----|
|       | hay     |          |                                         |          |     |
|       | Alfalfa |          |                                         |          |     |
| Rumen | hay     | Negative | quantity of lymphatic system component  | 3.78E-06 | 118 |
|       | Alfalfa |          |                                         |          |     |
| Rumen | hay     | Negative | proliferation of embryonic cell lines   | 4.22E-06 | 56  |
|       | Alfalfa |          |                                         |          |     |
| Rumen | hay     | Negative | migration of endothelial cells          | 4.58E-06 | 104 |
|       | Alfalfa |          |                                         |          |     |
| Rumen | hay     | Negative | morphology of cardiovascular tissue     | 4.58E-06 | 35  |
|       | Alfalfa |          |                                         |          |     |
| Rumen | hay     | Negative | cell death of muscle cells              | 4.63E-06 | 106 |
|       | Alfalfa |          |                                         |          |     |
| Rumen | hay     | Negative | cellular infiltration of cells          | 4.64E-06 | 123 |
|       | Alfalfa |          |                                         |          |     |
| Rumen | hay     | Negative | necrosis of muscle                      | 4.65E-06 | 108 |
|       | Alfalfa |          |                                         |          |     |
| Rumen | hay     | Negative | autosomal dominant disease              | 4.71E-06 | 188 |
|       | Alfalfa |          |                                         |          |     |
| Rumen | hay     | Negative | quantity of lymphoid organ              | 5.42E-06 | 98  |
|       | Alfalfa |          |                                         |          |     |
| Rumen | hay     | Negative | cell death of cerebral cortex cells     | 5.54E-06 | 76  |
|       | Alfalfa |          |                                         |          |     |
| Rumen | hay     | Negative | cell death of T lymphocytes             | 5.54E-06 | 100 |
|       | Alfalfa |          |                                         |          |     |
| Rumen | hay     | Negative | cellular degradation                    | 5.55E-06 | 83  |
|       | Alfalfa |          |                                         |          |     |
| Rumen | hay     | Negative | metabolism of membrane lipid derivative | 5.83E-06 | 120 |
|       | Alfalfa |          |                                         |          |     |
| Rumen | hay     | Negative | apoptosis of leukocytes                 | 5.83E-06 | 139 |
|       | Alfalfa |          |                                         |          |     |
| Rumen | hay     | Negative | degeneration of cells                   | 5.83E-06 | 108 |
|       | Alfalfa |          |                                         |          |     |
| Rumen | hay     | Negative | chemotaxis of cells                     | 5.95E-06 | 158 |
|       | Alfalfa |          |                                         |          |     |
| Rumen | hay     | Negative | quantity of hematopoietic cells         | 6.16E-06 | 135 |
|       | Alfalfa |          |                                         |          |     |
| Rumen | hay     | Negative | migration of connective tissue cells    | 6.59E-06 | 62  |
|       | Alfalfa |          |                                         |          |     |
| Rumen | hay     | Negative | T cell development                      | 6.92E-06 | 151 |
|       | Alfalfa |          |                                         |          |     |
| Rumen | hay     | Negative | apoptosis of carcinoma cell lines       | 7.66E-06 | 80  |
|       | Alfalfa |          |                                         |          |     |
| Rumen | hay     | Negative | development of neurons                  | 7.98E-06 | 225 |
| Rumen | Alfalfa | Negative | growth of lesion                        | 8.00E-06 | 229 |

|       |         |          |                                              |          |     |
|-------|---------|----------|----------------------------------------------|----------|-----|
|       | hay     |          |                                              |          |     |
|       | Alfalfa |          |                                              |          |     |
| Rumen | hay     | Negative | quantity of hematopoietic progenitor cells   | 8.52E-06 | 134 |
|       | Alfalfa |          |                                              |          |     |
| Rumen | hay     | Negative | cell death of kidney cell lines              | 8.59E-06 | 96  |
|       | Alfalfa |          |                                              |          |     |
| Rumen | hay     | Negative | size of animal                               | 8.59E-06 | 61  |
|       | Alfalfa |          |                                              |          |     |
| Rumen | hay     | Negative | degeneration of neurons                      | 9.45E-06 | 78  |
|       | Alfalfa |          |                                              |          |     |
| Rumen | hay     | Negative | differentiation of neuronal progenitor cells | 9.76E-06 | 23  |
|       | Alfalfa |          |                                              |          |     |
| Rumen | hay     | Negative | morphology of endothelial tissue             | 9.98E-06 | 33  |
|       | Alfalfa |          |                                              |          |     |
| Rumen | hay     | Negative | cell death of pheochromocytoma cell lines    | 9.98E-06 | 44  |
|       | Alfalfa |          |                                              |          |     |
| Rumen | hay     | Negative | growth of tumor                              | 1.02E-05 | 228 |
|       | Alfalfa |          |                                              |          |     |
| Rumen | hay     | Negative | recruitment of blood cells                   | 1.03E-05 | 103 |
|       | Alfalfa |          |                                              |          |     |
| Rumen | hay     | Negative | apoptosis of muscle                          | 1.15E-05 | 84  |
|       | Alfalfa |          |                                              |          |     |
| Rumen | hay     | Negative | quantity of thymus gland                     | 1.16E-05 | 76  |
|       | Alfalfa |          |                                              |          |     |
| Rumen | hay     | Negative | metabolism of protein                        | 1.30E-05 | 273 |
|       | Alfalfa |          |                                              |          |     |
| Rumen | hay     | Negative | cell death of mononuclear leukocytes         | 1.36E-05 | 121 |
|       | Alfalfa |          |                                              |          |     |
| Rumen | hay     | Negative | cell death of tumor cells                    | 1.44E-05 | 114 |
|       | Alfalfa |          |                                              |          |     |
| Rumen | hay     | Negative | hydrolysis of lipid                          | 1.44E-05 | 63  |
|       | Alfalfa |          |                                              |          |     |
| Rumen | hay     | Negative | infection by Retroviridae                    | 1.45E-05 | 207 |
|       | Alfalfa |          |                                              |          |     |
| Rumen | hay     | Negative | apoptosis of fibroblast cell lines           | 1.47E-05 | 102 |
|       | Alfalfa |          |                                              |          |     |
| Rumen | hay     | Negative | morphology of muscle                         | 1.47E-05 | 104 |
|       | Alfalfa |          |                                              |          |     |
| Rumen | hay     | Negative | proliferation of blood cells                 | 1.47E-05 | 239 |
|       | Alfalfa |          |                                              |          |     |
| Rumen | hay     | Negative | quantity of thymocytes                       | 1.48E-05 | 75  |
|       | Alfalfa |          |                                              |          |     |
| Rumen | hay     | Negative | cell death of central nervous system cells   | 1.51E-05 | 92  |
| Rumen | Alfalfa | Negative | apoptosis of connective tissue cells         | 1.53E-05 | 93  |

|       |         |          |                                              |          |     |
|-------|---------|----------|----------------------------------------------|----------|-----|
|       | hay     |          |                                              |          |     |
|       | Alfalfa |          |                                              |          |     |
| Rumen | hay     | Negative | morphology of connective tissue              | 1.54E-05 | 138 |
|       | Alfalfa |          |                                              |          |     |
| Rumen | hay     | Negative | cardiogenesis                                | 1.60E-05 | 141 |
|       | Alfalfa |          |                                              |          |     |
| Rumen | hay     | Negative | apoptosis of muscle cells                    | 1.65E-05 | 83  |
|       | Alfalfa |          |                                              |          |     |
| Rumen | hay     | Negative | congenital anomaly of musculoskeletal system | 1.65E-05 | 211 |
|       | Alfalfa |          |                                              |          |     |
| Rumen | hay     | Negative | activation of DNA endogenous promoter        | 1.65E-05 | 332 |
|       | Alfalfa |          |                                              |          |     |
| Rumen | hay     | Negative | interphase                                   | 1.65E-05 | 190 |
|       | Alfalfa |          |                                              |          |     |
| Rumen | hay     | Negative | migration of fibroblasts                     | 1.65E-05 | 50  |
|       | Alfalfa |          |                                              |          |     |
| Rumen | hay     | Negative | homeostasis of leukocytes                    | 1.75E-05 | 163 |
|       | Alfalfa |          |                                              |          |     |
| Rumen | hay     | Negative | morphology of respiratory system             | 1.76E-05 | 97  |
|       | Alfalfa |          |                                              |          |     |
| Rumen | hay     | Negative | morphology of endothelial cells              | 1.83E-05 | 26  |
|       | Alfalfa |          |                                              |          |     |
| Rumen | hay     | Negative | activation of enzyme                         | 1.84E-05 | 118 |
|       | Alfalfa |          |                                              |          |     |
| Rumen | hay     | Negative | autophagy of cells                           | 1.89E-05 | 84  |
|       | Alfalfa |          |                                              |          |     |
| Rumen | hay     | Negative | cell death of fibroblasts                    | 1.89E-05 | 84  |
|       | Alfalfa |          |                                              |          |     |
| Rumen | hay     | Negative | vascularization                              | 2.00E-05 | 76  |
|       | Alfalfa |          |                                              |          |     |
| Rumen | hay     | Negative | Lymphocyte homeostasis                       | 2.05E-05 | 160 |
|       | Alfalfa |          |                                              |          |     |
| Rumen | hay     | Negative | cell death of lymphocytes                    | 2.05E-05 | 117 |
|       | Alfalfa |          |                                              |          |     |
| Rumen | hay     | Negative | female genital tract serous cancer           | 2.05E-05 | 117 |
|       | Alfalfa |          |                                              |          |     |
| Rumen | hay     | Negative | development of lymphatic system component    | 2.20E-05 | 96  |
|       | Alfalfa |          |                                              |          |     |
| Rumen | hay     | Negative | T cell homeostasis                           | 2.30E-05 | 152 |
|       | Alfalfa |          |                                              |          |     |
| Rumen | hay     | Negative | consumption of oxygen                        | 2.34E-05 | 53  |
|       | Alfalfa |          |                                              |          |     |
| Rumen | hay     | Negative | differentiation of muscle cell lines         | 2.38E-05 | 55  |
| Rumen | Alfalfa | Negative | Thrombosis                                   | 2.38E-05 | 57  |



|       |         |          |                                           |          |     |
|-------|---------|----------|-------------------------------------------|----------|-----|
|       | hay     |          |                                           |          |     |
|       | Alfalfa |          |                                           |          |     |
| Rumen | hay     | Negative | recruitment of leukocytes                 | 2.50E-05 | 100 |
|       | Alfalfa |          |                                           |          |     |
| Rumen | hay     | Negative | morphology of head                        | 2.58E-05 | 246 |
|       | Alfalfa |          |                                           |          |     |
| Rumen | hay     | Negative | Bleeding                                  | 2.67E-05 | 127 |
|       | Alfalfa |          |                                           |          |     |
| Rumen | hay     | Negative | activation of leukocytes                  | 2.68E-05 | 200 |
|       | Alfalfa |          |                                           |          |     |
| Rumen | hay     | Negative | abnormal morphology of respiratory system | 2.76E-05 | 95  |
|       | Alfalfa |          |                                           |          |     |
| Rumen | hay     | Negative | cell death of hematopoietic cell lines    | 2.82E-05 | 74  |
|       | Alfalfa |          |                                           |          |     |
| Rumen | hay     | Negative | apoptosis of hematopoietic cell lines     | 2.82E-05 | 67  |
|       | Alfalfa |          |                                           |          |     |
| Rumen | hay     | Negative | morphogenesis of neurons                  | 2.92E-05 | 127 |
|       | Alfalfa |          |                                           |          |     |
| Rumen | hay     | Negative | cell movement of granulocytes             | 3.27E-05 | 112 |
|       | Alfalfa |          |                                           |          |     |
| Rumen | hay     | Negative | infection by RNA virus                    | 3.27E-05 | 243 |
|       | Alfalfa |          |                                           |          |     |
| Rumen | hay     | Negative | neuritogenesis                            | 3.31E-05 | 169 |
|       | Alfalfa |          |                                           |          |     |
| Rumen | hay     | Negative | differentiation of blood cells            | 3.33E-05 | 237 |
|       | Alfalfa |          |                                           |          |     |
| Rumen | hay     | Negative | quantity of myeloid cells                 | 3.35E-05 | 108 |
|       | Alfalfa |          |                                           |          |     |
| Rumen | hay     | Negative | activation of blood cells                 | 3.35E-05 | 212 |
|       | Alfalfa |          |                                           |          |     |
| Rumen | hay     | Negative | cell death of cortical neurons            | 3.62E-05 | 58  |
|       | Alfalfa |          |                                           |          |     |
| Rumen | hay     | Negative | growth of lymphatic system component      | 3.62E-05 | 63  |
|       | Alfalfa |          |                                           |          |     |
| Rumen | hay     | Negative | size of embryo                            | 3.73E-05 | 108 |
|       | Alfalfa |          |                                           |          |     |
| Rumen | hay     | Negative | organization of organelle                 | 3.93E-05 | 157 |
|       | Alfalfa |          |                                           |          |     |
| Rumen | hay     | Negative | proliferation of fibroblast cell lines    | 3.96E-05 | 126 |
|       | Alfalfa |          |                                           |          |     |
| Rumen | hay     | Negative | infection by lentivirus                   | 3.96E-05 | 203 |
|       | Alfalfa |          |                                           |          |     |
| Rumen | hay     | Negative | cell movement of hepatoma cell lines      | 3.97E-05 | 34  |
| Rumen | Alfalfa | Negative | neurodegeneration of neurites             | 3.97E-05 | 34  |

|       |         |          |                                              |          |     |
|-------|---------|----------|----------------------------------------------|----------|-----|
|       | hay     |          |                                              |          |     |
|       | Alfalfa |          |                                              |          |     |
| Rumen | hay     | Negative | cleavage of lipid                            | 3.97E-05 | 65  |
|       | Alfalfa |          |                                              |          |     |
| Rumen | hay     | Negative | formation of eye                             | 3.97E-05 | 130 |
|       | Alfalfa |          |                                              |          |     |
| Rumen | hay     | Negative | formation of plasma membrane projections     | 4.05E-05 | 172 |
|       | Alfalfa |          |                                              |          |     |
| Rumen | hay     | Negative | transmembrane potential of mitochondria      | 4.08E-05 | 69  |
|       | Alfalfa |          |                                              |          |     |
| Rumen | hay     | Negative | proliferation of immune cells                | 4.12E-05 | 223 |
|       | Alfalfa |          |                                              |          |     |
| Rumen | hay     | Negative | proliferation of hematopoietic cells         | 4.23E-05 | 80  |
|       | Alfalfa |          |                                              |          |     |
| Rumen | hay     | Negative | differentiation of muscle                    | 4.26E-05 | 93  |
|       | Alfalfa |          |                                              |          |     |
| Rumen | hay     | Negative | neonatal death                               | 4.32E-05 | 130 |
|       | Alfalfa |          |                                              |          |     |
| Rumen | hay     | Negative | ruffling                                     | 4.51E-05 | 39  |
|       | Alfalfa |          |                                              |          |     |
| Rumen | hay     | Negative | proliferation of lymphatic system cells      | 4.58E-05 | 65  |
|       | Alfalfa |          |                                              |          |     |
| Rumen | hay     | Negative | HIV infection                                | 4.60E-05 | 202 |
|       | Alfalfa |          |                                              |          |     |
| Rumen | hay     | Negative | development of body axis                     | 4.61E-05 | 289 |
|       | Alfalfa |          |                                              |          |     |
| Rumen | hay     | Negative | paraproteinemia                              | 4.66E-05 | 102 |
|       | Alfalfa |          |                                              |          |     |
| Rumen | hay     | Negative | cell death of myeloma cell lines             | 5.03E-05 | 35  |
|       | Alfalfa |          |                                              |          |     |
| Rumen | hay     | Negative | formation of lamellipodia                    | 5.07E-05 | 54  |
|       | Alfalfa |          |                                              |          |     |
| Rumen | hay     | Negative | development of hematopoietic system          | 5.24E-05 | 78  |
|       | Alfalfa |          |                                              |          |     |
| Rumen | hay     | Negative | cell death of endothelial cells              | 5.29E-05 | 65  |
|       | Alfalfa |          |                                              |          |     |
| Rumen | hay     | Negative | advanced malignant tumor                     | 5.57E-05 | 236 |
|       | Alfalfa |          |                                              |          |     |
| Rumen | hay     | Negative | apoptosis of B-lymphocyte derived cell lines | 5.65E-05 | 43  |
|       | Alfalfa |          |                                              |          |     |
| Rumen | hay     | Negative | hypertrophy of heart                         | 5.81E-05 | 102 |
|       | Alfalfa |          |                                              |          |     |
| Rumen | hay     | Negative | mass of organism                             | 5.83E-05 | 101 |
| Rumen | Alfalfa | Negative | recruitment of macrophages                   | 5.84E-05 | 38  |

|       |         |          |                                                 |          |     |
|-------|---------|----------|-------------------------------------------------|----------|-----|
|       | hay     |          |                                                 |          |     |
|       | Alfalfa |          |                                                 |          |     |
| Rumen | hay     | Negative | cell death of malignant tumor                   | 5.94E-05 | 92  |
|       | Alfalfa |          |                                                 |          |     |
| Rumen | hay     | Negative | formation of actin filaments                    | 5.94E-05 | 93  |
|       | Alfalfa |          |                                                 |          |     |
| Rumen | hay     | Negative | cell death of leukocyte cell lines              | 6.10E-05 | 65  |
|       | Alfalfa |          |                                                 |          |     |
| Rumen | hay     | Negative | aggregation of blood platelets                  | 6.14E-05 | 62  |
|       | Alfalfa |          |                                                 |          |     |
| Rumen | hay     | Negative | cell viability of neuroblastoma cell lines      | 6.24E-05 | 25  |
|       | Alfalfa |          |                                                 |          |     |
| Rumen | hay     | Negative | I-kappaB kinase/NF-kappaB cascade               | 6.24E-05 | 57  |
|       | Alfalfa |          |                                                 |          |     |
| Rumen | hay     | Negative | quantity of B lymphocytes                       | 6.24E-05 | 104 |
|       | Alfalfa |          |                                                 |          |     |
| Rumen | hay     | Negative | blood protein disorder                          | 6.31E-05 | 112 |
|       | Alfalfa |          |                                                 |          |     |
| Rumen | hay     | Negative | concentration of Ca <sup>2+</sup>               | 6.35E-05 | 44  |
|       | Alfalfa |          |                                                 |          |     |
| Rumen | hay     | Negative | invasion of tissue                              | 6.36E-05 | 63  |
|       | Alfalfa |          |                                                 |          |     |
| Rumen | hay     | Negative | proliferation of hematopoietic progenitor cells | 6.36E-05 | 76  |
|       | Alfalfa |          |                                                 |          |     |
| Rumen | hay     | Negative | quantity of IL-6 in blood                       | 6.42E-05 | 32  |
|       | Alfalfa |          |                                                 |          |     |
| Rumen | hay     | Negative | development of head                             | 6.50E-05 | 270 |
|       | Alfalfa |          |                                                 |          |     |
| Rumen | hay     | Negative | apoptosis of leukocyte cell lines               | 6.55E-05 | 58  |
|       | Alfalfa |          |                                                 |          |     |
| Rumen | hay     | Negative | function of blood vessel                        | 6.64E-05 | 23  |
|       | Alfalfa |          |                                                 |          |     |
| Rumen | hay     | Negative | autophagy of fibroblast cell lines              | 6.70E-05 | 18  |
|       | Alfalfa |          |                                                 |          |     |
| Rumen | hay     | Negative | transformation of fibroblast cell lines         | 6.74E-05 | 80  |
|       | Alfalfa |          |                                                 |          |     |
| Rumen | hay     | Negative | apoptosis of neurons                            | 6.82E-05 | 128 |
|       | Alfalfa |          |                                                 |          |     |
| Rumen | hay     | Negative | apoptosis of fibroblasts                        | 6.86E-05 | 69  |
|       | Alfalfa |          |                                                 |          |     |
| Rumen | hay     | Negative | plasma cell dyscrasia                           | 6.92E-05 | 101 |
|       | Alfalfa |          |                                                 |          |     |
| Rumen | hay     | Negative | uptake of monosaccharide                        | 6.92E-05 | 83  |
| Rumen | Alfalfa | Negative | cell death of brain cells                       | 6.97E-05 | 84  |

|       |         |          |                                               |          |     |
|-------|---------|----------|-----------------------------------------------|----------|-----|
|       | hay     |          |                                               |          |     |
|       | Alfalfa |          |                                               |          |     |
| Rumen | hay     | Negative | apoptosis of T lymphocytes                    | 7.05E-05 | 86  |
|       | Alfalfa |          |                                               |          |     |
| Rumen | hay     | Negative | apoptosis of breast cancer cell lines         | 7.09E-05 | 88  |
|       | Alfalfa |          |                                               |          |     |
| Rumen | hay     | Negative | mitosis                                       | 7.09E-05 | 144 |
|       | Alfalfa |          |                                               |          |     |
| Rumen | hay     | Negative | cell death of brain                           | 7.09E-05 | 89  |
|       | Alfalfa |          |                                               |          |     |
| Rumen | hay     | Negative | metastasis                                    | 7.13E-05 | 213 |
|       | Alfalfa |          |                                               |          |     |
| Rumen | hay     | Negative | cell movement of phagocytes                   | 7.20E-05 | 158 |
|       | Alfalfa |          |                                               |          |     |
| Rumen | hay     | Negative | cell death of B-lymphocyte derived cell lines | 7.45E-05 | 44  |
|       | Alfalfa |          |                                               |          |     |
| Rumen | hay     | Negative | catabolism of protein                         | 7.45E-05 | 172 |
|       | Alfalfa |          |                                               |          |     |
| Rumen | hay     | Negative | function of macrophages                       | 7.45E-05 | 58  |
|       | Alfalfa |          |                                               |          |     |
| Rumen | hay     | Negative | branching of cells                            | 7.56E-05 | 110 |
|       | Alfalfa |          |                                               |          |     |
| Rumen | hay     | Negative | cell viability of cortical neurons            | 7.70E-05 | 20  |
|       | Alfalfa |          |                                               |          |     |
| Rumen | hay     | Negative | branching of neurites                         | 7.74E-05 | 85  |
|       | Alfalfa |          |                                               |          |     |
| Rumen | hay     | Negative | engulfment of cells                           | 7.74E-05 | 120 |
|       | Alfalfa |          |                                               |          |     |
| Rumen | hay     | Negative | formation of vascular lesion                  | 7.74E-05 | 40  |
|       | Alfalfa |          |                                               |          |     |
| Rumen | hay     | Negative | apoptosis of myeloma cell lines               | 8.00E-05 | 31  |
|       | Alfalfa |          |                                               |          |     |
| Rumen | hay     | Negative | function of muscle                            | 8.07E-05 | 104 |
|       | Alfalfa |          |                                               |          |     |
| Rumen | hay     | Negative | congenital malformation of skeleton           | 8.63E-05 | 124 |
|       | Alfalfa |          |                                               |          |     |
| Rumen | hay     | Negative | proliferation of endothelial cells            | 8.72E-05 | 94  |
|       | Alfalfa |          |                                               |          |     |
| Rumen | hay     | Negative | necrosis of malignant tumor                   | 8.77E-05 | 91  |
|       | Alfalfa |          |                                               |          |     |
| Rumen | hay     | Negative | abnormal morphology of head                   | 8.99E-05 | 231 |
|       | Alfalfa |          |                                               |          |     |
| Rumen | hay     | Negative | transport of carboxylic acid                  | 8.99E-05 | 41  |
| Rumen | Alfalfa | Negative | synaptic transmission                         | 9.22E-05 | 101 |

|       |         |          |                                           |          |     |
|-------|---------|----------|-------------------------------------------|----------|-----|
|       | hay     |          |                                           |          |     |
|       | Alfalfa |          |                                           |          |     |
| Rumen | hay     | Negative | aggregation of blood cells                | 9.67E-05 | 73  |
|       | Alfalfa |          |                                           |          |     |
| Rumen | hay     | Negative | quantity of lymphatic system cells        | 9.72E-05 | 84  |
|       | Alfalfa |          |                                           |          |     |
| Rumen | hay     | Negative | branching of neurons                      | 9.80E-05 | 87  |
|       | Alfalfa |          |                                           |          |     |
| Rumen | hay     | Negative | neurotransmission                         | 9.99E-05 | 121 |
|       | Alfalfa |          |                                           |          |     |
| Rumen | hay     | Negative | cell viability of connective tissue cells | 1.00E-04 | 45  |
|       | Alfalfa |          |                                           |          |     |
| Rumen | hay     | Negative | homo-oligomerization of protein           | 1.00E-04 | 45  |
|       | Alfalfa |          |                                           |          |     |
| Rumen | hay     | Negative | development of phagocytes                 | 1.03E-04 | 30  |
|       | Alfalfa |          |                                           |          |     |
| Rumen | hay     | Negative | apoptosis of endothelial cells            | 1.05E-04 | 59  |
|       | Alfalfa |          |                                           |          |     |
| Rumen | hay     | Negative | development of abdomen                    | 1.05E-04 | 165 |
|       | Alfalfa |          |                                           |          |     |
| Rumen | hay     | Negative | S phase                                   | 1.05E-04 | 80  |
|       | Alfalfa |          |                                           |          |     |
| Rumen | hay     | Negative | Hypertrophy                               | 1.06E-04 | 137 |
|       | Alfalfa |          |                                           |          |     |
| Rumen | hay     | Negative | quantity of muscle                        | 1.07E-04 | 44  |
|       | Alfalfa |          |                                           |          |     |
| Rumen | hay     | Negative | migration of myeloid cells                | 1.07E-04 | 54  |
|       | Alfalfa |          |                                           |          |     |
| Rumen | hay     | Negative | uptake of carbohydrate                    | 1.08E-04 | 88  |
|       | Alfalfa |          |                                           |          |     |
| Rumen | hay     | Negative | cell death of liver                       | 1.10E-04 | 74  |
|       | Alfalfa |          |                                           |          |     |
| Rumen | hay     | Negative | damage of epithelial tissue               | 1.10E-04 | 37  |
|       | Alfalfa |          |                                           |          |     |
| Rumen | hay     | Negative | immune response of cells                  | 1.11E-04 | 163 |
|       | Alfalfa |          |                                           |          |     |
| Rumen | hay     | Negative | recruitment of phagocytes                 | 1.13E-04 | 76  |
|       | Alfalfa |          |                                           |          |     |
| Rumen | hay     | Negative | cell movement of muscle cells             | 1.15E-04 | 58  |
|       | Alfalfa |          |                                           |          |     |
| Rumen | hay     | Negative | morphology of reproductive system         | 1.19E-04 | 153 |
|       | Alfalfa |          |                                           |          |     |
| Rumen | hay     | Negative | cell death of cancer cells                | 1.20E-04 | 90  |
| Rumen | Alfalfa | Negative | entry into S phase                        | 1.21E-04 | 47  |

|       |         |          |                                                |          |     |
|-------|---------|----------|------------------------------------------------|----------|-----|
|       | hay     |          |                                                |          |     |
|       | Alfalfa |          |                                                |          |     |
| Rumen | hay     | Negative | cell viability of central nervous system cells | 1.22E-04 | 39  |
|       | Alfalfa |          |                                                |          |     |
| Rumen | hay     | Negative | abnormal morphology of reproductive system     | 1.24E-04 | 146 |
|       | Alfalfa |          |                                                |          |     |
| Rumen | hay     | Negative | transport of synaptic vesicles                 | 1.24E-04 | 27  |
|       | Alfalfa |          |                                                |          |     |
| Rumen | hay     | Negative | morphogenesis of neurites                      | 1.25E-04 | 122 |
|       | Alfalfa |          |                                                |          |     |
| Rumen | hay     | Negative | assembly of protein-protein complex            | 1.25E-04 | 60  |
|       | Alfalfa |          |                                                |          |     |
| Rumen | hay     | Negative | apoptosis of pheochromocytoma cell lines       | 1.26E-04 | 33  |
|       | Alfalfa |          |                                                |          |     |
| Rumen | hay     | Negative | autophosphorylation of protein                 | 1.28E-04 | 52  |
|       | Alfalfa |          |                                                |          |     |
| Rumen | hay     | Negative | stress response of cells                       | 1.30E-04 | 46  |
|       | Alfalfa |          |                                                |          |     |
| Rumen | hay     | Negative | morphology of heart ventricle                  | 1.30E-04 | 61  |
|       | Alfalfa |          |                                                |          |     |
| Rumen | hay     | Negative | migration of hepatoma cell lines               | 1.30E-04 | 30  |
|       | Alfalfa |          |                                                |          |     |
| Rumen | hay     | Negative | shape change of neurons                        | 1.32E-04 | 88  |
|       | Alfalfa |          |                                                |          |     |
| Rumen | hay     | Negative | replication of RNA virus                       | 1.36E-04 | 145 |
|       | Alfalfa |          |                                                |          |     |
| Rumen | hay     | Negative | quantity of muscle cells                       | 1.39E-04 | 40  |
|       | Alfalfa |          |                                                |          |     |
| Rumen | hay     | Negative | craniofacial abnormality                       | 1.40E-04 | 105 |
|       | Alfalfa |          |                                                |          |     |
| Rumen | hay     | Negative | astrocytosis of hippocampus                    | 1.41E-04 | 9   |
|       | Alfalfa |          |                                                |          |     |
| Rumen | hay     | Negative | ion homeostasis of cells                       | 1.47E-04 | 158 |
|       | Alfalfa |          |                                                |          |     |
| Rumen | hay     | Negative | permeability of cells                          | 1.48E-04 | 35  |
|       | Alfalfa |          |                                                |          |     |
| Rumen | hay     | Negative | cell movement of vascular smooth muscle cells  | 1.48E-04 | 39  |
|       | Alfalfa |          |                                                |          |     |
| Rumen | hay     | Negative | abnormal morphology of endothelial tissue      | 1.49E-04 | 25  |
|       | Alfalfa |          |                                                |          |     |
| Rumen | hay     | Negative | influx of cation                               | 1.49E-04 | 61  |
|       | Alfalfa |          |                                                |          |     |
| Rumen | hay     | Negative | degeneration of central nervous system         | 1.52E-04 | 44  |
| Rumen | Alfalfa | Negative | necrosis of liver                              | 1.54E-04 | 73  |

|       |         |          |                                         |          |     |
|-------|---------|----------|-----------------------------------------|----------|-----|
|       | hay     |          |                                         |          |     |
|       | Alfalfa |          |                                         |          |     |
| Rumen | hay     | Negative | sensory system development              | 1.56E-04 | 38  |
|       | Alfalfa |          |                                         |          |     |
| Rumen | hay     | Negative | quantity of phagocytes                  | 1.56E-04 | 123 |
|       | Alfalfa |          |                                         |          |     |
| Rumen | hay     | Negative | recruitment of antigen presenting cells | 1.57E-04 | 41  |
|       | Alfalfa |          |                                         |          |     |
| Rumen | hay     | Negative | cell movement of neutrophils            | 1.63E-04 | 89  |
|       | Alfalfa |          |                                         |          |     |
| Rumen | hay     | Negative | transmigration of cells                 | 1.63E-04 | 51  |
|       | Alfalfa |          |                                         |          |     |
| Rumen | hay     | Negative | growth of embryonic tissue              | 1.64E-04 | 83  |
|       | Alfalfa |          |                                         |          |     |
| Rumen | hay     | Negative | apoptosis of cerebral cortex cells      | 1.64E-04 | 37  |
|       | Alfalfa |          |                                         |          |     |
| Rumen | hay     | Negative | vascularization of body region          | 1.66E-04 | 45  |
|       | Alfalfa |          |                                         |          |     |
| Rumen | hay     | Negative | synthesis of carbohydrate               | 1.69E-04 | 123 |
|       | Alfalfa |          |                                         |          |     |
| Rumen | hay     | Negative | apoptosis of kidney cell lines          | 1.73E-04 | 73  |
|       | Alfalfa |          |                                         |          |     |
| Rumen | hay     | Negative | concentration of phospholipid           | 1.75E-04 | 58  |
|       | Alfalfa |          |                                         |          |     |
| Rumen | hay     | Negative | degeneration of brain                   | 1.75E-04 | 42  |
|       | Alfalfa |          |                                         |          |     |
| Rumen | hay     | Negative | shape change of tumor cell lines        | 1.78E-04 | 50  |
|       | Alfalfa |          |                                         |          |     |
| Rumen | hay     | Negative | peripheral vascular disease             | 1.82E-04 | 111 |
|       | Alfalfa |          |                                         |          |     |
| Rumen | hay     | Negative | function of heart                       | 1.90E-04 | 71  |
|       | Alfalfa |          |                                         |          |     |
| Rumen | hay     | Negative | binding of DNA                          | 1.96E-04 | 148 |
|       | Alfalfa |          |                                         |          |     |
| Rumen | hay     | Negative | hydrolysis of phospholipid              | 1.96E-04 | 43  |
|       | Alfalfa |          |                                         |          |     |
| Rumen | hay     | Negative | benign neoplasia                        | 2.02E-04 | 252 |
|       | Alfalfa |          |                                         |          |     |
| Rumen | hay     | Negative | size of lesion                          | 2.02E-04 | 77  |
|       | Alfalfa |          |                                         |          |     |
| Rumen | hay     | Negative | morphogenesis of axons                  | 2.15E-04 | 30  |
|       | Alfalfa |          |                                         |          |     |
| Rumen | hay     | Negative | atrophy of muscle                       | 2.15E-04 | 48  |
| Rumen | Alfalfa | Negative | cell death of skin                      | 2.15E-04 | 36  |

|       |         |          |                                             |          |     |
|-------|---------|----------|---------------------------------------------|----------|-----|
|       | hay     |          |                                             |          |     |
|       | Alfalfa |          |                                             |          |     |
| Rumen | hay     | Negative | formation of filopodia                      | 2.15E-04 | 53  |
|       | Alfalfa |          |                                             |          |     |
| Rumen | hay     | Negative | atherogenesis                               | 2.16E-04 | 29  |
|       | Alfalfa |          |                                             |          |     |
| Rumen | hay     | Negative | development of sensory organ                | 2.17E-04 | 159 |
|       | Alfalfa |          |                                             |          |     |
| Rumen | hay     | Negative | hyperesthesia                               | 2.17E-04 | 39  |
|       | Alfalfa |          |                                             |          |     |
| Rumen | hay     | Negative | cell death of liver cells                   | 2.24E-04 | 61  |
|       | Alfalfa |          |                                             |          |     |
| Rumen | hay     | Negative | cell death of hepatoma cell lines           | 2.25E-04 | 54  |
|       | Alfalfa |          |                                             |          |     |
| Rumen | hay     | Negative | length of cells                             | 2.25E-04 | 35  |
|       | Alfalfa |          |                                             |          |     |
| Rumen | hay     | Negative | apoptosis of hepatoma cell lines            | 2.29E-04 | 49  |
|       | Alfalfa |          | abnormal morphology of vascular endothelial |          |     |
| Rumen | hay     | Negative | cells                                       | 2.33E-04 | 18  |
|       | Alfalfa |          |                                             |          |     |
| Rumen | hay     | Negative | infection of cells                          | 2.38E-04 | 219 |
|       | Alfalfa |          |                                             |          |     |
| Rumen | hay     | Negative | replication of virus                        | 2.40E-04 | 158 |
|       | Alfalfa |          |                                             |          |     |
| Rumen | hay     | Negative | proliferation of myeloid cells              | 2.45E-04 | 40  |
|       | Alfalfa |          |                                             |          |     |
| Rumen | hay     | Negative | apoptosis of lymphoma cell lines            | 2.46E-04 | 56  |
|       | Alfalfa |          |                                             |          |     |
| Rumen | hay     | Negative | cell death of embryonic cell lines          | 2.46E-04 | 73  |
|       | Alfalfa |          |                                             |          |     |
| Rumen | hay     | Negative | apoptosis of cortical neurons               | 2.66E-04 | 31  |
|       | Alfalfa |          |                                             |          |     |
| Rumen | hay     | Negative | morphology of vascular endothelial cells    | 2.72E-04 | 21  |
|       | Alfalfa |          |                                             |          |     |
| Rumen | hay     | Negative | apoptosis of mononuclear leukocytes         | 2.72E-04 | 104 |
|       | Alfalfa |          |                                             |          |     |
| Rumen | hay     | Negative | cell death of stem cells                    | 2.72E-04 | 30  |
|       | Alfalfa |          |                                             |          |     |
| Rumen | hay     | Negative | metabolism of phospholipid                  | 2.73E-04 | 71  |
|       | Alfalfa |          |                                             |          |     |
| Rumen | hay     | Negative | apoptosis of lymphocytes                    | 2.86E-04 | 101 |
|       | Alfalfa |          |                                             |          |     |
| Rumen | hay     | Negative | quantity of metal                           | 3.02E-04 | 141 |
| Rumen | Alfalfa | Negative | abnormal morphology of digestive system     | 3.03E-04 | 153 |



|       |         |          |                                             |          |     |
|-------|---------|----------|---------------------------------------------|----------|-----|
|       | hay     |          |                                             |          |     |
|       | Alfalfa |          |                                             |          |     |
| Rumen | hay     | Negative | cell death of sarcoma cell lines            | 3.03E-04 | 69  |
|       | Alfalfa |          |                                             |          |     |
| Rumen | hay     | Negative | entry into interphase                       | 3.18E-04 | 49  |
|       | Alfalfa |          |                                             |          |     |
| Rumen | hay     | Negative | infection of embryonic cell lines           | 3.18E-04 | 82  |
|       | Alfalfa |          |                                             |          |     |
| Rumen | hay     | Negative | infection of epithelial cell lines          | 3.18E-04 | 82  |
|       | Alfalfa |          |                                             |          |     |
| Rumen | hay     | Negative | abnormal morphology of heart ventricle      | 3.18E-04 | 55  |
|       | Alfalfa |          |                                             |          |     |
| Rumen | hay     | Negative | adhesion of tumor cell lines                | 3.51E-04 | 85  |
|       | Alfalfa |          |                                             |          |     |
| Rumen | hay     | Negative | Edema                                       | 3.55E-04 | 100 |
|       | Alfalfa |          |                                             |          |     |
| Rumen | hay     | Negative | cell movement of carcinoma cell lines       | 3.56E-04 | 63  |
|       | Alfalfa |          |                                             |          |     |
| Rumen | hay     | Negative | apoptosis of microglia                      | 3.56E-04 | 11  |
|       | Alfalfa |          |                                             |          |     |
| Rumen | hay     | Negative | entrance of Ca <sup>2+</sup>                | 3.64E-04 | 28  |
|       | Alfalfa |          |                                             |          |     |
| Rumen | hay     | Negative | contractility of heart                      | 3.70E-04 | 55  |
|       | Alfalfa |          |                                             |          |     |
| Rumen | hay     | Negative | proliferation of epithelial cells           | 3.71E-04 | 139 |
|       | Alfalfa |          |                                             |          |     |
| Rumen | hay     | Negative | development of connective tissue            | 3.71E-04 | 107 |
|       | Alfalfa |          |                                             |          |     |
| Rumen | hay     | Negative | synaptic transmission of nervous tissue     | 3.71E-04 | 37  |
|       | Alfalfa |          |                                             |          |     |
| Rumen | hay     | Negative | migration of muscle cells                   | 3.73E-04 | 52  |
|       | Alfalfa |          |                                             |          |     |
| Rumen | hay     | Negative | connective or soft tissue tumor             | 3.78E-04 | 194 |
|       | Alfalfa |          |                                             |          |     |
| Rumen | hay     | Negative | biosynthesis of polyunsaturated fatty acids | 3.82E-04 | 68  |
|       | Alfalfa |          |                                             |          |     |
| Rumen | hay     | Negative | cell viability of brain cells               | 3.84E-04 | 33  |
|       | Alfalfa |          |                                             |          |     |
| Rumen | hay     | Negative | long-term potentiation                      | 3.97E-04 | 73  |
|       | Alfalfa |          |                                             |          |     |
| Rumen | hay     | Negative | activation of neuroglia                     | 3.97E-04 | 43  |
|       | Alfalfa |          |                                             |          |     |
| Rumen | hay     | Negative | neurodegeneration of cerebral cortex        | 4.15E-04 | 22  |
| Rumen | Alfalfa | Negative | arrest in proliferation of cells            | 4.16E-04 | 65  |

|       |         |          |                                            |          |     |
|-------|---------|----------|--------------------------------------------|----------|-----|
|       | hay     |          |                                            |          |     |
|       | Alfalfa |          |                                            |          |     |
| Rumen | hay     | Negative | influx of inorganic cation                 | 4.18E-04 | 59  |
|       | Alfalfa |          |                                            |          |     |
| Rumen | hay     | Negative | abnormal morphology of embryonic tissue    | 4.33E-04 | 153 |
|       | Alfalfa |          |                                            |          |     |
| Rumen | hay     | Negative | neurodegeneration of axons                 | 4.39E-04 | 30  |
|       | Alfalfa |          |                                            |          |     |
| Rumen | hay     | Negative | morphology of digestive system             | 4.39E-04 | 159 |
|       | Alfalfa |          |                                            |          |     |
| Rumen | hay     | Negative | serous neoplasm                            | 4.42E-04 | 169 |
|       | Alfalfa |          |                                            |          |     |
| Rumen | hay     | Negative | branching of axons                         | 4.51E-04 | 29  |
|       | Alfalfa |          |                                            |          |     |
| Rumen | hay     | Negative | release of L-amino acid                    | 4.51E-04 | 29  |
|       | Alfalfa |          |                                            |          |     |
| Rumen | hay     | Negative | cognitive impairment                       | 4.52E-04 | 96  |
|       | Alfalfa |          |                                            |          |     |
| Rumen | hay     | Negative | abnormal morphology of abdomen             | 4.52E-04 | 237 |
|       | Alfalfa |          |                                            |          |     |
| Rumen | hay     | Negative | formation of lung                          | 4.57E-04 | 88  |
|       | Alfalfa |          |                                            |          |     |
| Rumen | hay     | Negative | activation of central nervous system cells | 4.60E-04 | 28  |
|       | Alfalfa |          |                                            |          |     |
| Rumen | hay     | Negative | development of antigen presenting cells    | 4.64E-04 | 25  |
|       | Alfalfa |          |                                            |          |     |
| Rumen | hay     | Negative | abnormal morphology of muscle              | 4.79E-04 | 92  |
|       | Alfalfa |          |                                            |          |     |
| Rumen | hay     | Negative | cell spreading of tumor cell lines         | 4.80E-04 | 36  |
|       | Alfalfa |          |                                            |          |     |
| Rumen | hay     | Negative | autosomal recessive disease                | 4.88E-04 | 248 |
|       | Alfalfa |          |                                            |          |     |
| Rumen | hay     | Negative | function of antigen presenting cells       | 4.96E-04 | 73  |
|       | Alfalfa |          |                                            |          |     |
| Rumen | hay     | Negative | release of neurotransmitter                | 5.01E-04 | 49  |
|       | Alfalfa |          |                                            |          |     |
| Rumen | hay     | Negative | binding of filaments                       | 5.11E-04 | 18  |
|       | Alfalfa |          |                                            |          |     |
| Rumen | hay     | Negative | targeting of protein                       | 5.12E-04 | 42  |
|       | Alfalfa |          |                                            |          |     |
| Rumen | hay     | Negative | migration of vascular smooth muscle cells  | 5.12E-04 | 35  |
|       | Alfalfa |          |                                            |          |     |
| Rumen | hay     | Negative | morphology of blood cells                  | 5.16E-04 | 118 |
| Rumen | Alfalfa | Negative | morphology of nervous system               | 5.20E-04 | 213 |

|       |         |          |                                             |          |     |
|-------|---------|----------|---------------------------------------------|----------|-----|
|       | hay     |          |                                             |          |     |
|       | Alfalfa |          |                                             |          |     |
| Rumen | hay     | Negative | apoptosis of dermal cells                   | 5.21E-04 | 31  |
|       | Alfalfa |          |                                             |          |     |
| Rumen | hay     | Negative | differentiation of connective tissue cells  | 5.23E-04 | 177 |
|       | Alfalfa |          |                                             |          |     |
| Rumen | hay     | Negative | quantity of metal ion                       | 5.45E-04 | 125 |
|       | Alfalfa |          |                                             |          |     |
| Rumen | hay     | Negative | flux of cation                              | 5.47E-04 | 89  |
|       | Alfalfa |          |                                             |          |     |
| Rumen | hay     | Negative | migration of fibroblast cell lines          | 5.51E-04 | 43  |
|       | Alfalfa |          |                                             |          |     |
| Rumen | hay     | Negative | transport of vesicles                       | 5.56E-04 | 41  |
|       | Alfalfa |          |                                             |          |     |
| Rumen | hay     | Negative | function of lymphocytes                     | 5.72E-04 | 98  |
|       | Alfalfa |          |                                             |          |     |
| Rumen | hay     | Negative | cell death of dermal cells                  | 5.81E-04 | 33  |
|       | Alfalfa |          |                                             |          |     |
| Rumen | hay     | Negative | infection of kidney cell lines              | 5.86E-04 | 83  |
|       | Alfalfa |          |                                             |          |     |
| Rumen | hay     | Negative | function of synapse                         | 5.92E-04 | 10  |
|       | Alfalfa |          |                                             |          |     |
| Rumen | hay     | Negative | differentiation of T lymphocytes            | 6.05E-04 | 108 |
|       | Alfalfa |          |                                             |          |     |
| Rumen | hay     | Negative | juvenile rheumatoid arthritis               | 6.06E-04 | 40  |
|       | Alfalfa |          |                                             |          |     |
| Rumen | hay     | Negative | engulfment of leukocytes                    | 6.06E-04 | 50  |
|       | Alfalfa |          |                                             |          |     |
| Rumen | hay     | Negative | congenital anomaly of cardiovascular system | 6.07E-04 | 68  |
|       | Alfalfa |          |                                             |          |     |
| Rumen | hay     | Negative | differentiation of lymphocytes              | 6.09E-04 | 139 |
|       | Alfalfa |          |                                             |          |     |
| Rumen | hay     | Negative | transport of carbohydrate                   | 6.09E-04 | 59  |
|       | Alfalfa |          |                                             |          |     |
| Rumen | hay     | Negative | apoptosis of skin                           | 6.09E-04 | 32  |
|       | Alfalfa |          |                                             |          |     |
| Rumen | hay     | Negative | invasion of tumor                           | 6.11E-04 | 72  |
|       | Alfalfa |          |                                             |          |     |
| Rumen | hay     | Negative | proliferation of myeloid progenitor cells   | 6.11E-04 | 17  |
|       | Alfalfa |          |                                             |          |     |
| Rumen | hay     | Negative | sarcoma                                     | 6.14E-04 | 117 |
|       | Alfalfa |          |                                             |          |     |
| Rumen | hay     | Negative | flux of ion                                 | 6.15E-04 | 93  |
| Rumen | Alfalfa | Negative | formation of muscle cells                   | 6.24E-04 | 55  |

|       |         |          |                                   |          |      |
|-------|---------|----------|-----------------------------------|----------|------|
|       | hay     |          |                                   |          |      |
|       | Alfalfa |          |                                   |          |      |
| Rumen | hay     | Negative | cell death of leukemia cell lines | 6.24E-04 | 92   |
|       | Alfalfa |          |                                   |          |      |
| Rumen | hay     | Negative | atherosclerotic lesion            | 6.31E-04 | 48   |
|       | Rice    |          |                                   |          |      |
| Rumen | straw   | Positive | proliferation of cells            | 1.63E-34 | 1224 |
|       | Rice    |          |                                   |          |      |
| Rumen | straw   | Positive | organismal death                  | 1.06E-33 | 850  |
|       | Rice    |          |                                   |          |      |
| Rumen | straw   | Positive | morbidity or mortality            | 3.21E-33 | 857  |
|       | Rice    |          |                                   |          |      |
| Rumen | straw   | Positive | malignant solid tumor             | 5.86E-32 | 3030 |
|       | Rice    |          |                                   |          |      |
| Rumen | straw   | Positive | cancer                            | 1.60E-31 | 3060 |
|       | Rice    |          |                                   |          |      |
| Rumen | straw   | Positive | cell death                        | 4.08E-23 | 1068 |
|       | Rice    |          |                                   |          |      |
| Rumen | straw   | Positive | morphology of cells               | 8.90E-22 | 668  |
|       | Rice    |          |                                   |          |      |
| Rumen | straw   | Positive | necrosis                          | 1.49E-21 | 846  |
|       | Rice    |          |                                   |          |      |
| Rumen | straw   | Positive | apoptosis                         | 3.35E-21 | 864  |
|       | Rice    |          |                                   |          |      |
| Rumen | straw   | Positive | tumorigenesis of tissue           | 6.28E-21 | 2555 |
|       | Rice    |          |                                   |          |      |
| Rumen | straw   | Positive | epithelial cancer                 | 1.30E-20 | 2494 |
|       | Rice    |          |                                   |          |      |
| Rumen | straw   | Positive | neoplasia of epithelial tissue    | 2.04E-20 | 2514 |
|       | Rice    |          |                                   |          |      |
| Rumen | straw   | Positive | expression of RNA                 | 2.04E-20 | 719  |
|       | Rice    |          |                                   |          |      |
| Rumen | straw   | Positive | transcription                     | 3.63E-20 | 674  |
|       | Rice    |          |                                   |          |      |
| Rumen | straw   | Positive | abdominal neoplasm                | 3.57E-19 | 2489 |
|       | Rice    |          |                                   |          |      |
| Rumen | straw   | Positive | transport of molecule             | 5.24E-19 | 557  |
|       | Rice    |          |                                   |          |      |
| Rumen | straw   | Positive | organization of cytoplasm         | 6.52E-19 | 533  |
|       | Rice    |          |                                   |          |      |
| Rumen | straw   | Positive | transcription of RNA              | 1.79E-18 | 626  |
|       | Rice    |          |                                   |          |      |
| Rumen | straw   | Positive | abdominal cancer                  | 3.66E-18 | 2456 |
| Rumen | Rice    | Positive | cell movement                     | 2.03E-17 | 698  |

|       |       |          |                                       |          |      |
|-------|-------|----------|---------------------------------------|----------|------|
|       | straw |          |                                       |          |      |
|       | Rice  |          |                                       |          |      |
| Rumen | straw | Positive | migration of cells                    | 4.88E-16 | 627  |
|       | Rice  |          |                                       |          |      |
| Rumen | straw | Positive | cell death of tumor cell lines        | 8.04E-16 | 517  |
|       | Rice  |          |                                       |          |      |
| Rumen | straw | Positive | organization of organelle             | 1.07E-15 | 214  |
|       | Rice  |          |                                       |          |      |
| Rumen | straw | Positive | cell death of connective tissue cells | 8.53E-15 | 232  |
|       | Rice  |          |                                       |          |      |
| Rumen | straw | Positive | differentiation of cells              | 2.58E-14 | 716  |
|       | Rice  |          |                                       |          |      |
| Rumen | straw | Positive | vasculogenesis                        | 2.84E-14 | 273  |
|       | Rice  |          |                                       |          |      |
| Rumen | straw | Positive | organization of cytoskeleton          | 3.14E-14 | 471  |
|       | Rice  |          |                                       |          |      |
| Rumen | straw | Positive | apoptosis of tumor cell lines         | 3.14E-14 | 417  |
|       | Rice  |          |                                       |          |      |
| Rumen | straw | Positive | angiogenesis                          | 4.42E-14 | 325  |
|       | Rice  |          |                                       |          |      |
| Rumen | straw | Positive | cell survival                         | 5.73E-14 | 469  |
|       | Rice  |          |                                       |          |      |
| Rumen | straw | Positive | quantity of cells                     | 9.40E-14 | 576  |
|       | Rice  |          |                                       |          |      |
| Rumen | straw | Positive | digestive system cancer               | 9.40E-14 | 2120 |
|       | Rice  |          |                                       |          |      |
| Rumen | straw | Positive | cell viability                        | 1.39E-13 | 440  |
|       | Rice  |          |                                       |          |      |
| Rumen | straw | Positive | digestive organ tumor                 | 1.85E-13 | 2136 |
|       | Rice  |          |                                       |          |      |
| Rumen | straw | Positive | Movement Disorders                    | 3.50E-13 | 367  |
|       | Rice  |          |                                       |          |      |
| Rumen | straw | Positive | transcription of DNA                  | 5.97E-13 | 505  |
|       | Rice  |          |                                       |          |      |
| Rumen | straw | Positive | growth of organism                    | 2.58E-12 | 296  |
|       | Rice  |          |                                       |          |      |
| Rumen | straw | Positive | synthesis of lipid                    | 5.90E-12 | 257  |
|       | Rice  |          |                                       |          |      |
| Rumen | straw | Positive | Viral Infection                       | 7.88E-12 | 521  |
|       | Rice  |          |                                       |          |      |
| Rumen | straw | Positive | microtubule dynamics                  | 9.44E-12 | 397  |
|       | Rice  |          |                                       |          |      |
| Rumen | straw | Positive | invasion of cells                     | 2.53E-11 | 302  |
| Rumen | Rice  | Positive | cellular homeostasis                  | 2.77E-11 | 492  |

|       |       |          |                                              |          |     |
|-------|-------|----------|----------------------------------------------|----------|-----|
|       | straw |          |                                              |          |     |
|       | Rice  |          |                                              |          |     |
| Rumen | straw | Positive | abnormal morphology of cells                 | 3.15E-11 | 418 |
|       | Rice  |          |                                              |          |     |
| Rumen | straw | Positive | growth of connective tissue                  | 3.60E-11 | 232 |
|       | Rice  |          |                                              |          |     |
| Rumen | straw | Positive | development of body trunk                    | 4.55E-11 | 374 |
|       | Rice  |          |                                              |          |     |
| Rumen | straw | Positive | congenital anomaly of musculoskeletal system | 4.55E-11 | 260 |
|       | Rice  |          |                                              |          |     |
| Rumen | straw | Positive | proliferation of tumor cell lines            | 4.85E-11 | 498 |
|       | Rice  |          |                                              |          |     |
| Rumen | straw | Positive | proliferation of connective tissue cells     | 5.95E-11 | 215 |
|       | Rice  |          |                                              |          |     |
| Rumen | straw | Positive | interphase                                   | 9.36E-11 | 234 |
|       | Rice  |          |                                              |          |     |
| Rumen | straw | Positive | morphology of cardiovascular system          | 1.34E-10 | 222 |
|       | Rice  |          |                                              |          |     |
| Rumen | straw | Positive | transactivation                              | 1.34E-10 | 209 |
|       | Rice  |          |                                              |          |     |
| Rumen | straw | Positive | size of body                                 | 2.06E-10 | 292 |
|       | Rice  |          |                                              |          |     |
| Rumen | straw | Positive | cell death of fibroblasts                    | 2.18E-10 | 107 |
|       | Rice  |          |                                              |          |     |
| Rumen | straw | Positive | morphology of body cavity                    | 2.19E-10 | 393 |
|       | Rice  |          |                                              |          |     |
| Rumen | straw | Positive | growth of embryo                             | 2.45E-10 | 176 |
|       | Rice  |          |                                              |          |     |
| Rumen | straw | Positive | invasion of tumor cell lines                 | 2.46E-10 | 235 |
|       | Rice  |          |                                              |          |     |
| Rumen | straw | Positive | function of leukocytes                       | 4.83E-10 | 194 |
|       | Rice  |          |                                              |          |     |
| Rumen | straw | Positive | cell cycle progression                       | 5.53E-10 | 348 |
|       | Rice  |          |                                              |          |     |
| Rumen | straw | Positive | phosphorylation of protein                   | 5.53E-10 | 255 |
|       | Rice  |          |                                              |          |     |
| Rumen | straw | Positive | apoptosis of connective tissue cells         | 6.39E-10 | 116 |
|       | Rice  |          |                                              |          |     |
| Rumen | straw | Positive | protein kinase cascade                       | 1.09E-09 | 156 |
|       | Rice  |          |                                              |          |     |
| Rumen | straw | Positive | perinatal death                              | 1.40E-09 | 210 |
|       | Rice  |          |                                              |          |     |
| Rumen | straw | Positive | formation of cytoskeleton                    | 1.49E-09 | 141 |
| Rumen | Rice  | Positive | activation of DNA endogenous promoter        | 1.50E-09 | 393 |

|       |       |          |                                         |          |     |
|-------|-------|----------|-----------------------------------------|----------|-----|
|       | straw |          |                                         |          |     |
|       | Rice  |          |                                         |          |     |
| Rumen | straw | Positive | quantity of leukocytes                  | 1.61E-09 | 307 |
|       | Rice  |          |                                         |          |     |
| Rumen | straw | Positive | function of blood cells                 | 1.89E-09 | 207 |
|       | Rice  |          |                                         |          |     |
| Rumen | straw | Positive | cell movement of tumor cell lines       | 4.02E-09 | 286 |
|       | Rice  |          |                                         |          |     |
| Rumen | straw | Positive | formation of cellular protrusions       | 4.25E-09 | 301 |
|       | Rice  |          |                                         |          |     |
| Rumen | straw | Positive | development of vasculature              | 4.25E-09 | 153 |
|       | Rice  |          |                                         |          |     |
| Rumen | straw | Positive | migration of tumor cell lines           | 4.98E-09 | 242 |
|       | Rice  |          |                                         |          |     |
| Rumen | straw | Positive | congenital malformation of skeleton     | 5.29E-09 | 154 |
|       | Rice  |          |                                         |          |     |
| Rumen | straw | Positive | quantity of blood cells                 | 5.29E-09 | 337 |
|       | Rice  |          |                                         |          |     |
| Rumen | straw | Positive | concentration of lipid                  | 5.84E-09 | 273 |
|       | Rice  |          |                                         |          |     |
| Rumen | straw | Positive | growth of epithelial tissue             | 7.80E-09 | 233 |
|       | Rice  |          |                                         |          |     |
| Rumen | straw | Positive | craniofacial abnormality                | 8.22E-09 | 132 |
|       | Rice  |          |                                         |          |     |
| Rumen | straw | Positive | uptake of carbohydrate                  | 8.31E-09 | 111 |
|       | Rice  |          |                                         |          |     |
| Rumen | straw | Positive | transactivation of RNA                  | 8.31E-09 | 191 |
|       | Rice  |          |                                         |          |     |
| Rumen | straw | Positive | morphology of nervous system            | 8.41E-09 | 264 |
|       | Rice  |          |                                         |          |     |
| Rumen | straw | Positive | metabolism of membrane lipid derivative | 8.64E-09 | 142 |
|       | Rice  |          |                                         |          |     |
| Rumen | straw | Positive | abnormal morphology of thoracic cavity  | 9.39E-09 | 204 |
|       | Rice  |          |                                         |          |     |
| Rumen | straw | Positive | abnormal morphology of nervous system   | 9.68E-09 | 246 |
|       | Rice  |          |                                         |          |     |
| Rumen | straw | Positive | secretory pathway                       | 1.06E-08 | 80  |
|       | Rice  |          |                                         |          |     |
| Rumen | straw | Positive | learning                                | 1.21E-08 | 151 |
|       | Rice  |          |                                         |          |     |
| Rumen | straw | Positive | necrosis of epithelial tissue           | 1.31E-08 | 204 |
|       | Rice  |          |                                         |          |     |
| Rumen | straw | Positive | cell movement of fibroblasts            | 1.47E-08 | 75  |
| Rumen | Rice  | Positive | quantity of connective tissue           | 1.53E-08 | 208 |

|       |       |          |                                                 |          |      |
|-------|-------|----------|-------------------------------------------------|----------|------|
|       | straw |          |                                                 |          |      |
|       | Rice  |          |                                                 |          |      |
| Rumen | straw | Positive | cognition                                       | 1.56E-08 | 162  |
|       | Rice  |          |                                                 |          |      |
| Rumen | straw | Positive | abnormal morphology of body cavity              | 1.65E-08 | 367  |
|       | Rice  |          |                                                 |          |      |
| Rumen | straw | Positive | cell death of cervical cancer cell lines        | 1.94E-08 | 129  |
|       | Rice  |          |                                                 |          |      |
| Rumen | straw | Positive | abdominal adenocarcinoma                        | 2.26E-08 | 1670 |
|       | Rice  |          |                                                 |          |      |
| Rumen | straw | Positive | proliferation of hematopoietic progenitor cells | 2.50E-08 | 94   |
|       | Rice  |          |                                                 |          |      |
| Rumen | straw | Positive | mitosis                                         | 2.90E-08 | 174  |
|       | Rice  |          |                                                 |          |      |
| Rumen | straw | Positive | ubiquitination                                  | 2.90E-08 | 124  |
|       | Rice  |          |                                                 |          |      |
| Rumen | straw | Positive | apoptosis of fibroblast cell lines              | 3.37E-08 | 121  |
|       | Rice  |          |                                                 |          |      |
| Rumen | straw | Positive | quantity of lymphocytes                         | 3.48E-08 | 238  |
|       | Rice  |          |                                                 |          |      |
| Rumen | straw | Positive | degeneration of cells                           | 3.51E-08 | 126  |
|       | Rice  |          |                                                 |          |      |
| Rumen | straw | Positive | uptake of monosaccharide                        | 3.51E-08 | 102  |
|       | Rice  |          |                                                 |          |      |
| Rumen | straw | Positive | development of cytoplasm                        | 3.51E-08 | 163  |
|       | Rice  |          |                                                 |          |      |
| Rumen | straw | Positive | Growth Failure                                  | 3.51E-08 | 205  |
|       | Rice  |          |                                                 |          |      |
| Rumen | straw | Positive | ubiquitination of protein                       | 3.55E-08 | 122  |
|       | Rice  |          |                                                 |          |      |
| Rumen | straw | Positive | neuromuscular disease                           | 3.55E-08 | 290  |
|       | Rice  |          |                                                 |          |      |
| Rumen | straw | Positive | proliferation of neuronal cells                 | 3.66E-08 | 198  |
|       | Rice  |          |                                                 |          |      |
| Rumen | straw | Positive | fibrogenesis                                    | 3.74E-08 | 147  |
|       | Rice  |          |                                                 |          |      |
| Rumen | straw | Positive | abnormal morphology of cardiovascular system    | 4.56E-08 | 195  |
|       | Rice  |          |                                                 |          |      |
| Rumen | straw | Positive | accumulation of lipid                           | 4.94E-08 | 111  |
|       | Rice  |          |                                                 |          |      |
| Rumen | straw | Positive | adenocarcinoma                                  | 5.49E-08 | 1823 |
|       | Rice  |          |                                                 |          |      |
| Rumen | straw | Positive | formation of cells                              | 5.80E-08 | 318  |
| Rumen | Rice  | Positive | quantity of mononuclear leukocytes              | 6.24E-08 | 245  |



|       |       |          |                                          |          |     |
|-------|-------|----------|------------------------------------------|----------|-----|
|       | straw |          |                                          |          |     |
|       | Rice  |          |                                          |          |     |
| Rumen | straw | Positive | morphology of heart                      | 7.91E-08 | 144 |
|       | Rice  |          |                                          |          |     |
| Rumen | straw | Positive | neurological signs                       | 9.22E-08 | 219 |
|       | Rice  |          |                                          |          |     |
| Rumen | straw | Positive | cell death of epithelial cells           | 9.32E-08 | 172 |
|       | Rice  |          |                                          |          |     |
| Rumen | straw | Positive | cell viability of tumor cell lines       | 9.39E-08 | 257 |
|       | Rice  |          |                                          |          |     |
| Rumen | straw | Positive | vascularization                          | 9.72E-08 | 90  |
|       | Rice  |          |                                          |          |     |
| Rumen | straw | Positive | degeneration of nervous system           | 1.19E-07 | 106 |
|       | Rice  |          |                                          |          |     |
| Rumen | straw | Positive | development of cardiovascular tissue     | 1.23E-07 | 132 |
|       | Rice  |          |                                          |          |     |
| Rumen | straw | Positive | cellular degradation                     | 1.84E-07 | 95  |
|       | Rice  |          |                                          |          |     |
| Rumen | straw | Positive | morphology of head                       | 1.90E-07 | 284 |
|       | Rice  |          |                                          |          |     |
| Rumen | straw | Positive | formation of filaments                   | 2.02E-07 | 140 |
|       | Rice  |          |                                          |          |     |
| Rumen | straw | Positive | S phase                                  | 2.03E-07 | 97  |
|       | Rice  |          |                                          |          |     |
| Rumen | straw | Positive | autosomal recessive disease              | 2.06E-07 | 297 |
|       | Rice  |          |                                          |          |     |
| Rumen | straw | Positive | degeneration of neurons                  | 2.08E-07 | 90  |
|       | Rice  |          |                                          |          |     |
| Rumen | straw | Positive | proliferation of hematopoietic cells     | 2.13E-07 | 95  |
|       | Rice  |          |                                          |          |     |
| Rumen | straw | Positive | Huntington's Disease                     | 2.25E-07 | 194 |
|       | Rice  |          |                                          |          |     |
| Rumen | straw | Positive | Organ Degeneration                       | 2.60E-07 | 169 |
|       | Rice  |          |                                          |          |     |
| Rumen | straw | Positive | dyskinesia                               | 3.28E-07 | 206 |
|       | Rice  |          |                                          |          |     |
| Rumen | straw | Positive | binding of DNA                           | 3.28E-07 | 177 |
|       | Rice  |          |                                          |          |     |
| Rumen | straw | Positive | cell movement of connective tissue cells | 3.51E-07 | 84  |
|       | Rice  |          |                                          |          |     |
| Rumen | straw | Positive | cell death of epithelial cell lines      | 3.65E-07 | 103 |
|       | Rice  |          |                                          |          |     |
| Rumen | straw | Positive | disorder of basal ganglia                | 4.33E-07 | 250 |
| Rumen | Rice  | Positive | development of blood cells               | 4.60E-07 | 216 |

|       |       |          |                                      |          |      |
|-------|-------|----------|--------------------------------------|----------|------|
|       | straw |          |                                      |          |      |
|       | Rice  |          |                                      |          |      |
| Rumen | straw | Positive | seizures                             | 4.66E-07 | 139  |
|       | Rice  |          |                                      |          |      |
| Rumen | straw | Positive | development of epithelial tissue     | 4.69E-07 | 175  |
|       | Rice  |          |                                      |          |      |
| Rumen | straw | Positive | abnormal morphology of head          | 4.80E-07 | 269  |
|       | Rice  |          |                                      |          |      |
| Rumen | straw | Positive | apoptosis of fibroblasts             | 5.30E-07 | 82   |
|       | Rice  |          |                                      |          |      |
| Rumen | straw | Positive | migration of connective tissue cells | 5.95E-07 | 70   |
|       | Rice  |          |                                      |          |      |
| Rumen | straw | Positive | exocytosis                           | 5.95E-07 | 73   |
|       | Rice  |          |                                      |          |      |
| Rumen | straw | Positive | synthesis of DNA                     | 6.24E-07 | 144  |
|       | Rice  |          |                                      |          |      |
| Rumen | straw | Positive | proliferation of fibroblasts         | 6.97E-07 | 124  |
|       | Rice  |          |                                      |          |      |
| Rumen | straw | Positive | congenital encephalopathy            | 7.26E-07 | 108  |
|       | Rice  |          |                                      |          |      |
| Rumen | straw | Positive | abdominal carcinoma                  | 7.55E-07 | 1676 |
|       | Rice  |          |                                      |          |      |
| Rumen | straw | Positive | genital tumor                        | 8.13E-07 | 1154 |
|       | Rice  |          |                                      |          |      |
| Rumen | straw | Positive | Neurodegeneration                    | 8.81E-07 | 110  |
|       | Rice  |          |                                      |          |      |
| Rumen | straw | Positive | congenital malformation of brain     | 8.84E-07 | 107  |
|       | Rice  |          |                                      |          |      |
| Rumen | straw | Positive | uptake of D-hexose                   | 8.91E-07 | 83   |
|       | Rice  |          |                                      |          |      |
| Rumen | straw | Positive | replication of virus                 | 9.48E-07 | 187  |
|       | Rice  |          |                                      |          |      |
| Rumen | straw | Positive | female genital neoplasm              | 9.74E-07 | 1022 |
|       | Rice  |          |                                      |          |      |
| Rumen | straw | Positive | development of leukocytes            | 1.06E-06 | 195  |
|       | Rice  |          |                                      |          |      |
| Rumen | straw | Positive | uptake of D-glucose                  | 1.09E-06 | 82   |
|       | Rice  |          |                                      |          |      |
| Rumen | straw | Positive | cell death of fibroblast cell lines  | 1.11E-06 | 146  |
|       | Rice  |          |                                      |          |      |
| Rumen | straw | Positive | growth of embryonic tissue           | 1.11E-06 | 99   |
|       | Rice  |          |                                      |          |      |
| Rumen | straw | Positive | replication of RNA virus             | 1.11E-06 | 170  |
| Rumen | Rice  | Positive | seizure disorder                     | 1.12E-06 | 159  |

|       |       |          |                                         |          |      |  |
|-------|-------|----------|-----------------------------------------|----------|------|--|
|       | straw |          |                                         |          |      |  |
|       | Rice  |          |                                         |          |      |  |
| Rumen | straw | Positive | apoptosis of cervical cancer cell lines | 1.16E-06 | 101  |  |
|       | Rice  |          |                                         |          |      |  |
| Rumen | straw | Positive | development of endothelial tissue       | 1.24E-06 | 127  |  |
|       | Rice  |          |                                         |          |      |  |
| Rumen | straw | Positive | cell movement of endothelial cells      | 1.40E-06 | 123  |  |
|       | Rice  |          |                                         |          |      |  |
| Rumen | straw | Positive | endothelial cell development            | 1.40E-06 | 123  |  |
|       | Rice  |          |                                         |          |      |  |
| Rumen | straw | Positive | development of connective tissue        | 1.74E-06 | 128  |  |
|       | Rice  |          |                                         |          |      |  |
| Rumen | straw | Positive | neuritogenesis                          | 1.95E-06 | 192  |  |
|       | Rice  |          |                                         |          |      |  |
| Rumen | straw | Positive | vascularization of body region          | 2.04E-06 | 54   |  |
|       | Rice  |          |                                         |          |      |  |
| Rumen | straw | Positive | gastrointestinal tract cancer           | 2.04E-06 | 1422 |  |
|       | Rice  |          |                                         |          |      |  |
| Rumen | straw | Positive | cell transformation                     | 2.10E-06 | 155  |  |
|       | Rice  |          |                                         |          |      |  |
| Rumen | straw | Positive | growth of lesion                        | 2.15E-06 | 255  |  |
|       | Rice  |          |                                         |          |      |  |
| Rumen | straw | Positive | cell movement of leukocytes             | 2.16E-06 | 246  |  |
|       | Rice  |          |                                         |          |      |  |
| Rumen | straw | Positive | differentiation of epithelial tissue    | 2.22E-06 | 124  |  |
|       | Rice  |          |                                         |          |      |  |
| Rumen | straw | Positive | hepatocellular carcinoma                | 2.24E-06 | 1188 |  |
|       | Rice  |          |                                         |          |      |  |
| Rumen | straw | Positive | development of lymphatic system         | 2.35E-06 | 123  |  |
|       | Rice  |          |                                         |          |      |  |
| Rumen | straw | Positive | gastrointestinal carcinoma              | 2.38E-06 | 1280 |  |
|       | Rice  |          |                                         |          |      |  |
| Rumen | straw | Positive | morphology of respiratory system        | 2.43E-06 | 109  |  |
|       | Rice  |          |                                         |          |      |  |
| Rumen | straw | Positive | formation of skin                       | 2.48E-06 | 126  |  |
|       | Rice  |          |                                         |          |      |  |
| Rumen | straw | Positive | growth of tumor                         | 2.66E-06 | 254  |  |
|       | Rice  |          |                                         |          |      |  |
| Rumen | straw | Positive | migration of fibroblasts                | 2.70E-06 | 56   |  |
|       | Rice  |          |                                         |          |      |  |
| Rumen | straw | Positive | cell spreading                          | 2.84E-06 | 98   |  |
|       | Rice  |          |                                         |          |      |  |
| Rumen | straw | Positive | proliferation of epithelial cells       | 2.84E-06 | 164  |  |
| Rumen | Rice  | Positive | development of abdomen                  | 2.88E-06 | 190  |  |

|       |       |          |                                           |          |      |
|-------|-------|----------|-------------------------------------------|----------|------|
|       | straw |          |                                           |          |      |
|       | Rice  |          |                                           |          |      |
| Rumen | straw | Positive | morphology of bone                        | 2.99E-06 | 151  |
|       | Rice  |          |                                           |          |      |
| Rumen | straw | Positive | proliferation of blood cells              | 3.03E-06 | 267  |
|       | Rice  |          |                                           |          |      |
| Rumen | straw | Positive | metabolism of carbohydrate                | 3.34E-06 | 202  |
|       | Rice  |          |                                           |          |      |
| Rumen | straw | Positive | abnormal morphology of respiratory system | 3.57E-06 | 107  |
|       | Rice  |          |                                           |          |      |
| Rumen | straw | Positive | cell movement of blood cells              | 3.66E-06 | 276  |
|       | Rice  |          |                                           |          |      |
| Rumen | straw | Positive | differentiation of tumor cell lines       | 3.75E-06 | 129  |
|       | Rice  |          |                                           |          |      |
| Rumen | straw | Positive | midline defect                            | 4.02E-06 | 94   |
|       | Rice  |          |                                           |          |      |
| Rumen | straw | Positive | migration of blood cells                  | 4.24E-06 | 275  |
|       | Rice  |          |                                           |          |      |
| Rumen | straw | Positive | growth of muscle tissue                   | 4.27E-06 | 127  |
|       | Rice  |          |                                           |          |      |
| Rumen | straw | Positive | formation of actin filaments              | 4.30E-06 | 106  |
|       | Rice  |          |                                           |          |      |
| Rumen | straw | Positive | proliferation of endothelial cells        | 4.38E-06 | 108  |
|       | Rice  |          |                                           |          |      |
| Rumen | straw | Positive | abnormal morphology of heart              | 4.41E-06 | 130  |
|       | Rice  |          |                                           |          |      |
| Rumen | straw | Positive | formation of plasma membrane projections  | 4.47E-06 | 194  |
|       | Rice  |          |                                           |          |      |
| Rumen | straw | Positive | transport of protein                      | 4.49E-06 | 105  |
|       | Rice  |          |                                           |          |      |
| Rumen | straw | Positive | arthritis                                 | 4.53E-06 | 293  |
|       | Rice  |          |                                           |          |      |
| Rumen | straw | Positive | formation of lymphatic system component   | 4.60E-06 | 102  |
|       | Rice  |          |                                           |          |      |
| Rumen | straw | Positive | quantity of glycosphingolipid             | 4.60E-06 | 41   |
|       | Rice  |          |                                           |          |      |
| Rumen | straw | Positive | hepatobiliary system cancer               | 4.67E-06 | 1226 |
|       | Rice  |          |                                           |          |      |
| Rumen | straw | Positive | migration of endothelial cells            | 4.70E-06 | 113  |
|       | Rice  |          |                                           |          |      |
| Rumen | straw | Positive | proliferation of muscle cells             | 4.97E-06 | 126  |
|       | Rice  |          |                                           |          |      |
| Rumen | straw | Positive | concentration of phospholipid             | 5.04E-06 | 68   |
| Rumen | Rice  | Positive | leukocyte migration                       | 5.04E-06 | 274  |

|       |       |          |                                            |          |      |  |
|-------|-------|----------|--------------------------------------------|----------|------|--|
|       | straw |          |                                            |          |      |  |
|       | Rice  |          |                                            |          |      |  |
| Rumen | straw | Positive | development of lymphatic system component  | 5.12E-06 | 107  |  |
|       | Rice  |          |                                            |          |      |  |
| Rumen | straw | Positive | arthropathy                                | 5.48E-06 | 297  |  |
|       | Rice  |          |                                            |          |      |  |
| Rumen | straw | Positive | morphogenesis of neurons                   | 5.98E-06 | 142  |  |
|       | Rice  |          |                                            |          |      |  |
| Rumen | straw | Positive | synthesis of carbohydrate                  | 5.98E-06 | 142  |  |
|       | Rice  |          |                                            |          |      |  |
| Rumen | straw | Positive | behavior                                   | 6.19E-06 | 307  |  |
|       | Rice  |          |                                            |          |      |  |
| Rumen | straw | Positive | formation of lymphoid organ                | 6.32E-06 | 93   |  |
|       | Rice  |          |                                            |          |      |  |
| Rumen | straw | Positive | T cell development                         | 7.01E-06 | 165  |  |
|       | Rice  |          |                                            |          |      |  |
| Rumen | straw | Positive | quantity of metal ion                      | 7.30E-06 | 147  |  |
|       | Rice  |          |                                            |          |      |  |
| Rumen | straw | Positive | abnormal morphology of bone                | 7.54E-06 | 145  |  |
|       | Rice  |          |                                            |          |      |  |
| Rumen | straw | Positive | cell movement of myeloid cells             | 7.59E-06 | 176  |  |
|       | Rice  |          |                                            |          |      |  |
| Rumen | straw | Positive | survival of organism                       | 7.76E-06 | 224  |  |
|       | Rice  |          |                                            |          |      |  |
| Rumen | straw | Positive | liver cancer                               | 7.90E-06 | 1218 |  |
|       | Rice  |          |                                            |          |      |  |
| Rumen | straw | Positive | formation of actin stress fibers           | 7.97E-06 | 85   |  |
|       | Rice  |          |                                            |          |      |  |
| Rumen | straw | Positive | differentiation of bone cells              | 8.00E-06 | 136  |  |
|       | Rice  |          |                                            |          |      |  |
| Rumen | straw | Positive | proliferation of smooth muscle cells       | 8.04E-06 | 99   |  |
|       | Rice  |          |                                            |          |      |  |
| Rumen | straw | Positive | cell death of blood cells                  | 8.05E-06 | 221  |  |
|       | Rice  |          |                                            |          |      |  |
| Rumen | straw | Positive | cell death of T lymphocytes                | 8.08E-06 | 108  |  |
|       | Rice  |          |                                            |          |      |  |
| Rumen | straw | Positive | Gastrointestinal Tract Cancer and Tumors   | 8.13E-06 | 1436 |  |
|       | Rice  |          |                                            |          |      |  |
| Rumen | straw | Positive | abnormal morphology of abdomen             | 8.13E-06 | 274  |  |
|       | Rice  |          |                                            |          |      |  |
| Rumen | straw | Positive | differentiation of bone                    | 8.16E-06 | 137  |  |
|       | Rice  |          |                                            |          |      |  |
| Rumen | straw | Positive | differentiation of connective tissue cells | 8.64E-06 | 206  |  |
| Rumen | Rice  | Positive | quantity of carbohydrate                   | 9.16E-06 | 169  |  |

|       |       |          |                                           |          |      |
|-------|-------|----------|-------------------------------------------|----------|------|
|       | straw |          |                                           |          |      |
|       | Rice  |          |                                           |          |      |
| Rumen | straw | Positive | synthesis of nitric oxide                 | 9.35E-06 | 96   |
|       | Rice  |          |                                           |          |      |
| Rumen | straw | Positive | quantity of metal                         | 9.50E-06 | 163  |
|       | Rice  |          |                                           |          |      |
| Rumen | straw | Positive | oxidation of palmitic acid                | 9.65E-06 | 24   |
|       | Rice  |          |                                           |          |      |
| Rumen | straw | Positive | quantity of B lymphocytes                 | 9.65E-06 | 117  |
|       | Rice  |          |                                           |          |      |
| Rumen | straw | Positive | morphogenesis of neurites                 | 9.81E-06 | 139  |
|       | Rice  |          |                                           |          |      |
| Rumen | straw | Positive | growth of neurites                        | 1.02E-05 | 152  |
|       | Rice  |          |                                           |          |      |
| Rumen | straw | Positive | paraproteinemia                           | 1.03E-05 | 114  |
|       | Rice  |          |                                           |          |      |
| Rumen | straw | Positive | liver tumor                               | 1.05E-05 | 1224 |
|       | Rice  |          |                                           |          |      |
| Rumen | straw | Positive | development of neurons                    | 1.08E-05 | 246  |
|       | Rice  |          |                                           |          |      |
| Rumen | straw | Positive | differentiation of epithelial cells       | 1.08E-05 | 107  |
|       | Rice  |          |                                           |          |      |
| Rumen | straw | Positive | attachment of cells                       | 1.10E-05 | 52   |
|       | Rice  |          |                                           |          |      |
| Rumen | straw | Positive | sprouting                                 | 1.10E-05 | 129  |
|       | Rice  |          |                                           |          |      |
| Rumen | straw | Positive | epileptic seizure                         | 1.12E-05 | 62   |
|       | Rice  |          |                                           |          |      |
| Rumen | straw | Positive | morphology of central nervous system      | 1.13E-05 | 167  |
|       | Rice  |          |                                           |          |      |
| Rumen | straw | Positive | arrest in interphase                      | 1.15E-05 | 138  |
|       | Rice  |          |                                           |          |      |
| Rumen | straw | Positive | plasticity of synapse                     | 1.16E-05 | 47   |
|       | Rice  |          |                                           |          |      |
| Rumen | straw | Positive | development of digestive system           | 1.16E-05 | 128  |
|       | Rice  |          |                                           |          |      |
| Rumen | straw | Positive | small GTPase mediated signal transduction | 1.22E-05 | 67   |
|       | Rice  |          |                                           |          |      |
| Rumen | straw | Positive | peripheral vascular disease               | 1.24E-05 | 127  |
|       | Rice  |          |                                           |          |      |
| Rumen | straw | Positive | Edema                                     | 1.28E-05 | 116  |
|       | Rice  |          |                                           |          |      |
| Rumen | straw | Positive | secretion of molecule                     | 1.29E-05 | 178  |
| Rumen | Rice  | Positive | export of molecule                        | 1.34E-05 | 101  |

|       |       |          |                                        |          |      |
|-------|-------|----------|----------------------------------------|----------|------|
|       | straw |          |                                        |          |      |
|       | Rice  |          |                                        |          |      |
| Rumen | straw | Positive | transport of carbohydrate              | 1.34E-05 | 70   |
|       | Rice  |          |                                        |          |      |
| Rumen | straw | Positive | breast or colorectal cancer            | 1.36E-05 | 1387 |
|       | Rice  |          |                                        |          |      |
| Rumen | straw | Positive | tubulation of endothelial cells        | 1.40E-05 | 46   |
|       | Rice  |          |                                        |          |      |
| Rumen | straw | Positive | immune response of cells               | 1.42E-05 | 184  |
|       | Rice  |          |                                        |          |      |
| Rumen | straw | Positive | quantity of sphingolipid               | 1.42E-05 | 42   |
|       | Rice  |          |                                        |          |      |
| Rumen | straw | Positive | colony formation of cells              | 1.51E-05 | 160  |
|       | Rice  |          |                                        |          |      |
| Rumen | straw | Positive | plasma cell dyscrasia                  | 1.53E-05 | 113  |
|       | Rice  |          |                                        |          |      |
| Rumen | straw | Positive | concentration of fatty acid            | 1.54E-05 | 96   |
|       | Rice  |          |                                        |          |      |
| Rumen | straw | Positive | apoptosis of epithelial cell lines     | 1.54E-05 | 79   |
|       | Rice  |          |                                        |          |      |
| Rumen | straw | Positive | homeostasis of blood cells             | 1.54E-05 | 179  |
|       | Rice  |          |                                        |          |      |
| Rumen | straw | Positive | long-term potentiation                 | 1.57E-05 | 85   |
|       | Rice  |          |                                        |          |      |
| Rumen | straw | Positive | T cell homeostasis                     | 1.59E-05 | 167  |
|       | Rice  |          |                                        |          |      |
| Rumen | straw | Positive | development of lymphocytes             | 1.65E-05 | 178  |
|       | Rice  |          |                                        |          |      |
| Rumen | straw | Positive | Rheumatic Disease                      | 1.66E-05 | 329  |
|       | Rice  |          |                                        |          |      |
| Rumen | straw | Positive | branching of cells                     | 1.79E-05 | 123  |
|       | Rice  |          |                                        |          |      |
| Rumen | straw | Positive | differentiation of embryonic tissue    | 1.80E-05 | 88   |
|       | Rice  |          |                                        |          |      |
| Rumen | straw | Positive | development of mononuclear leukocytes  | 1.83E-05 | 179  |
|       | Rice  |          | abnormal morphology of central nervous |          |      |
| Rumen | straw | Positive | system                                 | 1.83E-05 | 157  |
|       | Rice  |          |                                        |          |      |
| Rumen | straw | Positive | concentration of cholesterol           | 1.91E-05 | 99   |
|       | Rice  |          |                                        |          |      |
| Rumen | straw | Positive | repair of DNA                          | 1.91E-05 | 99   |
|       | Rice  |          |                                        |          |      |
| Rumen | straw | Positive | homeostasis of leukocytes              | 1.96E-05 | 178  |
| Rumen | Rice  | Positive | function of myeloid cells              | 1.99E-05 | 83   |

|       |       |          |                                          |          |      |
|-------|-------|----------|------------------------------------------|----------|------|
|       | straw |          |                                          |          |      |
|       | Rice  |          |                                          |          |      |
| Rumen | straw | Positive | stage 3 cancer                           | 1.99E-05 | 51   |
|       | Rice  |          |                                          |          |      |
| Rumen | straw | Positive | differentiation of connective tissue     | 1.99E-05 | 229  |
|       | Rice  |          |                                          |          |      |
| Rumen | straw | Positive | function of lymphocytes                  | 1.99E-05 | 114  |
|       | Rice  |          |                                          |          |      |
| Rumen | straw | Positive | gonadal tumor                            | 1.99E-05 | 255  |
|       | Rice  |          |                                          |          |      |
| Rumen | straw | Positive | Lymphocyte homeostasis                   | 2.00E-05 | 175  |
|       | Rice  |          |                                          |          |      |
| Rumen | straw | Positive | benign neoplasia                         | 2.08E-05 | 285  |
|       | Rice  |          |                                          |          |      |
| Rumen | straw | Positive | outgrowth of neurites                    | 2.12E-05 | 133  |
|       | Rice  |          |                                          |          |      |
| Rumen | straw | Positive | development of reproductive system       | 2.16E-05 | 231  |
|       | Rice  |          | metabolism of nucleic acid component or  |          |      |
| Rumen | straw | Positive | derivative                               | 2.25E-05 | 167  |
|       | Rice  |          |                                          |          |      |
| Rumen | straw | Positive | proliferation of embryonic cells         | 2.25E-05 | 86   |
|       | Rice  |          |                                          |          |      |
| Rumen | straw | Positive | binding of protein binding site          | 2.26E-05 | 98   |
|       | Rice  |          |                                          |          |      |
| Rumen | straw | Positive | infection by RNA virus                   | 2.26E-05 | 268  |
|       | Rice  |          |                                          |          |      |
| Rumen | straw | Positive | apoptosis of blood cells                 | 2.31E-05 | 160  |
|       | Rice  |          |                                          |          |      |
| Rumen | straw | Positive | abnormal morphology of epithelial tissue | 2.43E-05 | 137  |
|       | Rice  |          |                                          |          |      |
| Rumen | straw | Positive | cell death of tumor                      | 2.46E-05 | 126  |
|       | Rice  |          |                                          |          |      |
| Rumen | straw | Positive | multiple congenital anomalies            | 2.51E-05 | 138  |
|       | Rice  |          |                                          |          |      |
| Rumen | straw | Positive | cell death of immune cells               | 2.52E-05 | 208  |
|       | Rice  |          |                                          |          |      |
| Rumen | straw | Positive | cell death of lymphocytes                | 2.55E-05 | 127  |
|       | Rice  |          |                                          |          |      |
| Rumen | straw | Positive | neonatal death                           | 2.64E-05 | 143  |
|       | Rice  |          |                                          |          |      |
| Rumen | straw | Positive | homing of cells                          | 2.70E-05 | 178  |
|       | Rice  |          |                                          |          |      |
| Rumen | straw | Positive | tumorigenesis of genital organ           | 2.72E-05 | 1101 |
| Rumen | Rice  | Positive | cell death of thymocytes                 | 3.00E-05 | 55   |



|       |       |          |                                             |          |      |
|-------|-------|----------|---------------------------------------------|----------|------|
|       | straw |          |                                             |          |      |
|       | Rice  |          |                                             |          |      |
| Rumen | straw | Positive | metabolism of nucleoside triphosphate       | 3.01E-05 | 52   |
|       | Rice  |          |                                             |          |      |
| Rumen | straw | Positive | development of genitourinary system         | 3.15E-05 | 273  |
|       | Rice  |          |                                             |          |      |
| Rumen | straw | Positive | polyarticular juvenile rheumatoid arthritis | 3.18E-05 | 36   |
|       | Rice  |          |                                             |          |      |
| Rumen | straw | Positive | cell death of mononuclear leukocytes        | 3.18E-05 | 130  |
|       | Rice  |          |                                             |          |      |
| Rumen | straw | Positive | differentiation of embryonic cells          | 3.18E-05 | 79   |
|       | Rice  |          |                                             |          |      |
| Rumen | straw | Positive | metabolism of protein                       | 3.29E-05 | 297  |
|       | Rice  |          |                                             |          |      |
| Rumen | straw | Positive | neovascularization                          | 3.42E-05 | 59   |
|       | Rice  |          |                                             |          |      |
| Rumen | straw | Positive | recruitment of antigen presenting cells     | 3.42E-05 | 46   |
|       | Rice  |          |                                             |          |      |
| Rumen | straw | Positive | fatty acid metabolism                       | 3.42E-05 | 190  |
|       | Rice  |          |                                             |          |      |
| Rumen | straw | Positive | peripheral arterial disease                 | 3.42E-05 | 74   |
|       | Rice  |          |                                             |          |      |
| Rumen | straw | Positive | synthesis of steroid                        | 3.48E-05 | 88   |
|       | Rice  |          |                                             |          |      |
| Rumen | straw | Positive | tubulation of cells                         | 3.64E-05 | 54   |
|       | Rice  |          |                                             |          |      |
| Rumen | straw | Positive | colon cancer                                | 3.70E-05 | 1042 |
|       | Rice  |          |                                             |          |      |
| Rumen | straw | Positive | colony formation                            | 3.70E-05 | 171  |
|       | Rice  |          |                                             |          |      |
| Rumen | straw | Positive | organization of filaments                   | 3.71E-05 | 72   |
|       | Rice  |          |                                             |          |      |
| Rumen | straw | Positive | proliferation of immune cells               | 3.89E-05 | 245  |
|       | Rice  |          |                                             |          |      |
| Rumen | straw | Positive | Encephalitis                                | 3.96E-05 | 99   |
|       | Rice  |          |                                             |          |      |
| Rumen | straw | Positive | oxidation of long chain fatty acid          | 3.97E-05 | 29   |
|       | Rice  |          |                                             |          |      |
| Rumen | straw | Positive | intestinal tumor                            | 4.06E-05 | 1218 |
|       | Rice  |          |                                             |          |      |
| Rumen | straw | Positive | neuronal cell death                         | 4.08E-05 | 213  |
|       | Rice  |          |                                             |          |      |
| Rumen | straw | Positive | blood protein disorder                      | 4.08E-05 | 123  |
| Rumen | Rice  | Positive | tumorigenesis of reproductive tract         | 4.09E-05 | 965  |

|       |       |          |                                        |          |      |
|-------|-------|----------|----------------------------------------|----------|------|
|       | straw |          |                                        |          |      |
|       | Rice  |          |                                        |          |      |
| Rumen | straw | Positive | cell death of neuroblastoma cell lines | 4.35E-05 | 68   |
|       | Rice  |          |                                        |          |      |
| Rumen | straw | Positive | cartilage development                  | 4.42E-05 | 53   |
|       | Rice  |          |                                        |          |      |
| Rumen | straw | Positive | inflammation of central nervous system | 4.43E-05 | 101  |
|       | Rice  |          |                                        |          |      |
| Rumen | straw | Positive | intestinal cancer                      | 4.48E-05 | 1200 |
|       | Rice  |          |                                        |          |      |
| Rumen | straw | Positive | quantity of T lymphocytes              | 4.68E-05 | 170  |
|       | Rice  |          |                                        |          |      |
| Rumen | straw | Positive | concentration of sterol                | 4.69E-05 | 102  |
|       | Rice  |          |                                        |          |      |
| Rumen | straw | Positive | tumorigenesis of gonad                 | 4.72E-05 | 249  |
|       | Rice  |          |                                        |          |      |
| Rumen | straw | Positive | cell movement of phagocytes            | 4.96E-05 | 174  |
|       | Rice  |          |                                        |          |      |
| Rumen | straw | Positive | cell movement of muscle cells          | 5.00E-05 | 64   |
|       | Rice  |          |                                        |          |      |
| Rumen | straw | Positive | cell death of breast cancer cell lines | 5.01E-05 | 110  |
|       | Rice  |          |                                        |          |      |
| Rumen | straw | Positive | proliferation of embryonic cell lines  | 5.03E-05 | 57   |
|       | Rice  |          |                                        |          |      |
| Rumen | straw | Positive | colorectal neoplasia                   | 5.12E-05 | 1213 |
|       | Rice  |          |                                        |          |      |
| Rumen | straw | Positive | neoplasia of colon                     | 5.12E-05 | 1043 |
|       | Rice  |          |                                        |          |      |
| Rumen | straw | Positive | necrosis of tumor                      | 5.18E-05 | 124  |
|       | Rice  |          |                                        |          |      |
| Rumen | straw | Positive | apoptosis of neuroblastoma cell lines  | 5.19E-05 | 46   |
|       | Rice  |          |                                        |          |      |
| Rumen | straw | Positive | colorectal cancer                      | 5.29E-05 | 1197 |
|       | Rice  |          |                                        |          |      |
| Rumen | straw | Positive | homing                                 | 5.33E-05 | 181  |
|       | Rice  |          |                                        |          |      |
| Rumen | straw | Positive | memory                                 | 5.38E-05 | 87   |
|       | Rice  |          |                                        |          |      |
| Rumen | straw | Positive | tumorigenesis of intestine             | 5.40E-05 | 1045 |
|       | Rice  |          |                                        |          |      |
| Rumen | straw | Positive | quantity of Ca <sup>2+</sup>           | 5.47E-05 | 132  |
|       | Rice  |          |                                        |          |      |
| Rumen | straw | Positive | branching of neurites                  | 5.55E-05 | 93   |
| Rumen | Rice  | Positive | infection by Retroviridae              | 5.55E-05 | 223  |

|       |       |          |                                               |          |      |
|-------|-------|----------|-----------------------------------------------|----------|------|
|       | straw |          |                                               |          |      |
|       | Rice  |          |                                               |          |      |
| Rumen | straw | Positive | biosynthesis of nucleoside triphosphate       | 5.58E-05 | 41   |
|       | Rice  |          |                                               |          |      |
| Rumen | straw | Positive | movement of vascular endothelial cells        | 5.78E-05 | 64   |
|       | Rice  |          |                                               |          |      |
| Rumen | straw | Positive | epilepsy                                      | 5.82E-05 | 102  |
|       | Rice  |          |                                               |          |      |
| Rumen | straw | Positive | colorectal carcinoma                          | 6.06E-05 | 1040 |
|       | Rice  |          |                                               |          |      |
| Rumen | straw | Positive | activation of enzyme                          | 6.07E-05 | 126  |
|       | Rice  |          |                                               |          |      |
| Rumen | straw | Positive | apoptosis of embryonic cells                  | 6.07E-05 | 38   |
|       | Rice  |          |                                               |          |      |
| Rumen | straw | Positive | colon tumor                                   | 6.07E-05 | 1045 |
|       | Rice  |          |                                               |          |      |
| Rumen | straw | Positive | abnormal morphology of embryonic tissue       | 6.07E-05 | 173  |
|       | Rice  |          |                                               |          |      |
| Rumen | straw | Positive | chemotaxis of cells                           | 6.07E-05 | 167  |
|       | Rice  |          |                                               |          |      |
| Rumen | straw | Positive | concentration of acylglycerol                 | 6.07E-05 | 110  |
|       | Rice  |          |                                               |          |      |
| Rumen | straw | Positive | serous neoplasm                               | 6.23E-05 | 191  |
|       | Rice  |          |                                               |          |      |
| Rumen | straw | Positive | metabolism of triacylglycerol                 | 6.40E-05 | 39   |
|       | Rice  |          |                                               |          |      |
| Rumen | straw | Positive | infection of cells                            | 6.41E-05 | 245  |
|       | Rice  |          |                                               |          |      |
| Rumen | straw | Positive | activation of cells                           | 6.53E-05 | 296  |
|       | Rice  |          |                                               |          |      |
| Rumen | straw | Positive | apoptosis of epithelial cells                 | 7.07E-05 | 95   |
|       | Rice  |          |                                               |          |      |
| Rumen | straw | Positive | outgrowth of cells                            | 7.25E-05 | 139  |
|       | Rice  |          |                                               |          |      |
| Rumen | straw | Positive | cell death of kidney cells                    | 7.26E-05 | 114  |
|       | Rice  |          |                                               |          |      |
| Rumen | straw | Positive | ion homeostasis of cells                      | 7.35E-05 | 175  |
|       | Rice  |          |                                               |          |      |
| Rumen | straw | Positive | development of gastrointestinal tract         | 7.39E-05 | 88   |
|       | Rice  |          |                                               |          |      |
| Rumen | straw | Positive | proliferation of central nervous system cells | 7.47E-05 | 54   |
|       | Rice  |          |                                               |          |      |
| Rumen | straw | Positive | concentration of Ca <sup>2+</sup>             | 7.90E-05 | 47   |
| Rumen | Rice  | Positive | Ovarian Cancer and Tumors                     | 7.90E-05 | 233  |

|       |       |          |                                       |          |      |
|-------|-------|----------|---------------------------------------|----------|------|
|       | straw |          |                                       |          |      |
|       | Rice  |          |                                       |          |      |
| Rumen | straw | Positive | cell movement of macrophages          | 7.90E-05 | 89   |
|       | Rice  |          |                                       |          |      |
| Rumen | straw | Positive | morphology of skeleton                | 7.95E-05 | 93   |
|       | Rice  |          |                                       |          |      |
| Rumen | straw | Positive | biosynthesis of purine ribonucleotide | 8.17E-05 | 39   |
|       | Rice  |          |                                       |          |      |
| Rumen | straw | Positive | cell death of kidney cell lines       | 8.27E-05 | 100  |
|       | Rice  |          |                                       |          |      |
| Rumen | straw | Positive | size of bone                          | 8.46E-05 | 92   |
|       | Rice  |          |                                       |          |      |
| Rumen | straw | Positive | differentiation of smooth muscle      | 8.63E-05 | 28   |
|       | Rice  |          |                                       |          |      |
| Rumen | straw | Positive | recruitment of phagocytes             | 8.63E-05 | 83   |
|       | Rice  |          |                                       |          |      |
| Rumen | straw | Positive | morphology of vessel                  | 8.69E-05 | 101  |
|       | Rice  |          |                                       |          |      |
| Rumen | straw | Positive | urogenital cancer                     | 8.78E-05 | 1239 |
|       | Rice  |          |                                       |          |      |
| Rumen | straw | Positive | genital tract cancer                  | 8.93E-05 | 1085 |
|       | Rice  |          |                                       |          |      |
| Rumen | straw | Positive | apoptosis of T lymphocytes            | 8.93E-05 | 93   |
|       | Rice  |          |                                       |          |      |
| Rumen | straw | Positive | epithelial-mesenchymal transition     | 9.27E-05 | 71   |
|       | Rice  |          |                                       |          |      |
| Rumen | straw | Positive | cell movement of neutrophils          | 9.34E-05 | 98   |
|       | Rice  |          |                                       |          |      |
| Rumen | straw | Positive | entry into S phase                    | 9.34E-05 | 51   |
|       | Rice  |          |                                       |          |      |
| Rumen | straw | Positive | encephalomyelitis                     | 9.34E-05 | 86   |
|       | Rice  |          |                                       |          |      |
| Rumen | straw | Positive | infection by lentivirus               | 9.47E-05 | 220  |
|       | Rice  |          |                                       |          |      |
| Rumen | straw | Positive | cognitive impairment                  | 9.55E-05 | 108  |
|       | Rice  |          |                                       |          |      |
| Rumen | straw | Positive | chemotaxis                            | 9.55E-05 | 171  |
|       | Rice  |          |                                       |          |      |
| Rumen | straw | Positive | maturation of cells                   | 9.78E-05 | 145  |
|       | Rice  |          |                                       |          |      |
| Rumen | straw | Positive | cell movement of smooth muscle cells  | 9.84E-05 | 57   |
|       | Rice  |          |                                       |          |      |
| Rumen | straw | Positive | cell death of tumor cells             | 9.85E-05 | 120  |
| Rumen | Rice  | Positive | morphology of reproductive system     | 9.96E-05 | 168  |

|       |       |          |                                              |          |     |
|-------|-------|----------|----------------------------------------------|----------|-----|
|       | straw |          |                                              |          |     |
|       | Rice  |          |                                              |          |     |
| Rumen | straw | Positive | female genital tract cancer                  | 1.00E-04 | 954 |
|       | Rice  |          |                                              |          |     |
| Rumen | straw | Positive | invasion of prostate cancer cell lines       | 1.02E-04 | 39  |
|       | Rice  |          |                                              |          |     |
| Rumen | straw | Positive | formation of focal adhesions                 | 1.03E-04 | 55  |
|       | Rice  |          |                                              |          |     |
| Rumen | straw | Positive | cell death of hematopoietic progenitor cells | 1.03E-04 | 77  |
|       | Rice  |          |                                              |          |     |
| Rumen | straw | Positive | recruitment of macrophages                   | 1.05E-04 | 40  |
|       | Rice  |          |                                              |          |     |
| Rumen | straw | Positive | differentiation of osteoblasts               | 1.05E-04 | 92  |
|       | Rice  |          |                                              |          |     |
| Rumen | straw | Positive | abnormal morphology of skeleton              | 1.05E-04 | 90  |
|       | Rice  |          |                                              |          |     |
| Rumen | straw | Positive | apoptosis of leukocytes                      | 1.05E-04 | 145 |
|       | Rice  |          |                                              |          |     |
| Rumen | straw | Positive | spatial learning                             | 1.06E-04 | 64  |
|       | Rice  |          |                                              |          |     |
| Rumen | straw | Positive | HIV infection                                | 1.06E-04 | 219 |
|       | Rice  |          |                                              |          |     |
| Rumen | straw | Positive | MAPKKK cascade                               | 1.10E-04 | 70  |
|       | Rice  |          |                                              |          |     |
| Rumen | straw | Positive | cell death of embryonic cells                | 1.12E-04 | 43  |
|       | Rice  |          |                                              |          |     |
| Rumen | straw | Positive | proliferation of myeloid cells               | 1.13E-04 | 44  |
|       | Rice  |          |                                              |          |     |
| Rumen | straw | Positive | homeostasis of ion                           | 1.13E-04 | 80  |
|       | Rice  |          |                                              |          |     |
| Rumen | straw | Positive | reorganization of cytoskeleton               | 1.13E-04 | 66  |
|       | Rice  |          |                                              |          |     |
| Rumen | straw | Positive | function of cardiovascular system            | 1.15E-04 | 119 |
|       | Rice  |          |                                              |          |     |
| Rumen | straw | Positive | transport of monosaccharide                  | 1.18E-04 | 56  |
|       | Rice  |          |                                              |          |     |
| Rumen | straw | Positive | engulfment of cells                          | 1.18E-04 | 130 |
|       | Rice  |          |                                              |          |     |
| Rumen | straw | Positive | Waldenstrom's macroglobulinemia              | 1.18E-04 | 65  |
|       | Rice  |          |                                              |          |     |
| Rumen | straw | Positive | synthesis of nucleotide                      | 1.18E-04 | 117 |
|       | Rice  |          |                                              |          |     |
| Rumen | straw | Positive | differentiation of muscle                    | 1.20E-04 | 99  |
| Rumen | Rice  | Positive | size of embryo                               | 1.22E-04 | 115 |

|       |       |          |                                           |          |     |
|-------|-------|----------|-------------------------------------------|----------|-----|
|       | straw |          |                                           |          |     |
|       | Rice  |          |                                           |          |     |
| Rumen | straw | Positive | synthesis of terpenoid                    | 1.24E-04 | 93  |
|       | Rice  |          |                                           |          |     |
| Rumen | straw | Positive | morphology of brain                       | 1.30E-04 | 147 |
|       | Rice  |          |                                           |          |     |
| Rumen | straw | Positive | chronic myeloid leukemia                  | 1.30E-04 | 40  |
|       | Rice  |          |                                           |          |     |
| Rumen | straw | Positive | differentiation of dermal cells           | 1.31E-04 | 58  |
|       | Rice  |          |                                           |          |     |
| Rumen | straw | Positive | growth of lymphatic system component      | 1.31E-04 | 66  |
|       | Rice  |          |                                           |          |     |
| Rumen | straw | Positive | metabolism of nucleotide                  | 1.32E-04 | 139 |
|       | Rice  |          |                                           |          |     |
| Rumen | straw | Positive | apoptosis of mononuclear leukocytes       | 1.35E-04 | 115 |
|       | Rice  |          |                                           |          |     |
| Rumen | straw | Positive | organization of cells                     | 1.38E-04 | 32  |
|       | Rice  |          |                                           |          |     |
| Rumen | straw | Positive | cell death of pheochromocytoma cell lines | 1.38E-04 | 44  |
|       | Rice  |          |                                           |          |     |
| Rumen | straw | Positive | demyelination                             | 1.38E-04 | 44  |
|       | Rice  |          |                                           |          |     |
| Rumen | straw | Positive | experimental autoimmune encephalomyelitis | 1.40E-04 | 85  |
|       | Rice  |          |                                           |          |     |
| Rumen | straw | Positive | mass of organism                          | 1.42E-04 | 108 |
|       | Rice  |          |                                           |          |     |
| Rumen | straw | Positive | necrosis of kidney                        | 1.44E-04 | 117 |
|       | Rice  |          |                                           |          |     |
| Rumen | straw | Positive | development of head                       | 1.53E-04 | 294 |
|       | Rice  |          |                                           |          |     |
| Rumen | straw | Positive | quantity of connective tissue cells       | 1.55E-04 | 79  |
|       | Rice  |          |                                           |          |     |
| Rumen | straw | Positive | oral cancer                               | 1.61E-04 | 76  |
|       | Rice  |          |                                           |          |     |
| Rumen | straw | Positive | neoplasia of cells                        | 1.62E-04 | 140 |
|       | Rice  |          |                                           |          |     |
| Rumen | straw | Positive | morphology of lymphatic system component  | 1.64E-04 | 132 |
|       | Rice  |          |                                           |          |     |
| Rumen | straw | Positive | organization of cellular membrane         | 1.66E-04 | 48  |
|       | Rice  |          |                                           |          |     |
| Rumen | straw | Positive | cell death of embryonic cell lines        | 1.67E-04 | 80  |
|       | Rice  |          |                                           |          |     |
| Rumen | straw | Positive | I-kappaB kinase/NF-kappaB cascade         | 1.68E-04 | 60  |
| Rumen | Rice  | Positive | cell death of lymphoid organ              | 1.68E-04 | 60  |

|       |       |          |                                                        |          |     |
|-------|-------|----------|--------------------------------------------------------|----------|-----|
|       | straw |          |                                                        |          |     |
|       | Rice  |          |                                                        |          |     |
| Rumen | straw | Positive | vascularization of eye                                 | 1.68E-04 | 43  |
|       | Rice  |          |                                                        |          |     |
| Rumen | straw | Positive | exencephaly                                            | 1.68E-04 | 45  |
|       | Rice  |          |                                                        |          |     |
| Rumen | straw | Positive | function of T lymphocytes                              | 1.68E-04 | 86  |
|       | Rice  |          |                                                        |          |     |
| Rumen | straw | Positive | proliferation of fibroblast cell lines                 | 1.69E-04 | 134 |
|       | Rice  |          |                                                        |          |     |
| Rumen | straw | Positive | respiratory system development                         | 1.69E-04 | 110 |
|       | Rice  |          |                                                        |          |     |
| Rumen | straw | Positive | cell death of hematopoietic cells                      | 1.75E-04 | 79  |
|       | Rice  |          |                                                        |          |     |
| Rumen | straw | Positive | accumulation of steroid                                | 1.78E-04 | 32  |
|       | Rice  |          |                                                        |          |     |
| Rumen | straw | Positive | differentiation of keratinocytes                       | 1.78E-04 | 53  |
|       | Rice  |          |                                                        |          |     |
| Rumen | straw | Positive | development of body axis                               | 1.83E-04 | 313 |
|       | Rice  |          |                                                        |          |     |
| Rumen | straw | Positive | mass of connective tissue                              | 1.84E-04 | 68  |
|       | Rice  |          |                                                        |          |     |
| Rumen | straw | Positive | differentiation of epidermal cells                     | 1.87E-04 | 57  |
|       | Rice  |          |                                                        |          |     |
| Rumen | straw | Positive | growth of skin                                         | 1.87E-04 | 73  |
|       | Rice  |          |                                                        |          |     |
| Rumen | straw | Positive | apoptosis of lymphocytes                               | 1.95E-04 | 111 |
|       | Rice  |          |                                                        |          |     |
| Rumen | straw | Positive | migration of sarcoma cell lines                        | 1.96E-04 | 30  |
|       | Rice  |          |                                                        |          |     |
| Rumen | straw | Positive | morphology of limb                                     | 1.96E-04 | 77  |
|       | Rice  |          |                                                        |          |     |
| Rumen | straw | Positive | dysmyelination                                         | 1.98E-04 | 48  |
|       | Rice  |          |                                                        |          |     |
| Rumen | straw | Positive | cell movement of granulocytes                          | 1.98E-04 | 118 |
|       | Rice  |          |                                                        |          |     |
| Rumen | straw | Positive | apoptosis of kidney cell lines                         | 1.98E-04 | 79  |
|       | Rice  |          |                                                        |          |     |
| Rumen | straw | Positive | intermediate disease stage peripheral arterial disease | 1.98E-04 | 55  |
|       | Rice  |          |                                                        |          |     |
| Rumen | straw | Positive | replication of Influenza virus                         | 2.05E-04 | 94  |
|       | Rice  |          |                                                        |          |     |
| Rumen | straw | Positive | Schizophrenia                                          | 2.05E-04 | 135 |
| Rumen | Rice  | Positive | cellular infiltration by leukocytes                    | 2.05E-04 | 123 |

|       |       |          |                                            |          |      |
|-------|-------|----------|--------------------------------------------|----------|------|
|       | straw |          |                                            |          |      |
|       | Rice  |          |                                            |          |      |
| Rumen | straw | Positive | double-stranded DNA break repair of cells  | 2.05E-04 | 24   |
|       | Rice  |          |                                            |          |      |
| Rumen | straw | Positive | abnormal morphology of brain               | 2.05E-04 | 140  |
|       | Rice  |          |                                            |          |      |
| Rumen | straw | Positive | activation of endothelial cells            | 2.06E-04 | 28   |
|       | Rice  |          |                                            |          |      |
| Rumen | straw | Positive | proliferation of tumor cells               | 2.11E-04 | 147  |
|       | Rice  |          |                                            |          |      |
| Rumen | straw | Positive | development of hematopoietic system        | 2.11E-04 | 82   |
|       | Rice  |          |                                            |          |      |
| Rumen | straw | Positive | long-term potentiation of synapse          | 2.15E-04 | 52   |
|       | Rice  |          |                                            |          |      |
| Rumen | straw | Positive | migration of muscle cells                  | 2.17E-04 | 57   |
|       | Rice  |          |                                            |          |      |
| Rumen | straw | Positive | benign neoplasm of female genital organ    | 2.18E-04 | 134  |
|       | Rice  |          |                                            |          |      |
| Rumen | straw | Positive | Fibrosis                                   | 2.21E-04 | 165  |
|       | Rice  |          |                                            |          |      |
| Rumen | straw | Positive | autophagy                                  | 2.21E-04 | 119  |
|       | Rice  |          |                                            |          |      |
| Rumen | straw | Positive | development of connective tissue cells     | 2.29E-04 | 74   |
|       | Rice  |          |                                            |          |      |
| Rumen | straw | Positive | fusion of vesicles                         | 2.31E-04 | 29   |
|       | Rice  |          |                                            |          |      |
| Rumen | straw | Positive | cellular infiltration by macrophages       | 2.32E-04 | 55   |
|       | Rice  |          |                                            |          |      |
| Rumen | straw | Positive | abnormal morphology of limb                | 2.32E-04 | 76   |
|       | Rice  |          |                                            |          |      |
| Rumen | straw | Positive | gastrointestinal adenocarcinoma            | 2.34E-04 | 1183 |
|       | Rice  |          |                                            |          |      |
| Rumen | straw | Positive | tumorigenesis of malignant tumor           | 2.35E-04 | 88   |
|       | Rice  |          |                                            |          |      |
| Rumen | straw | Positive | neurotransmission                          | 2.39E-04 | 130  |
|       | Rice  |          |                                            |          |      |
| Rumen | straw | Positive | abnormal morphology of skull               | 2.40E-04 | 73   |
|       | Rice  |          |                                            |          |      |
| Rumen | straw | Positive | abnormal morphology of reproductive system | 2.40E-04 | 158  |
|       | Rice  |          |                                            |          |      |
| Rumen | straw | Positive | schizophrenia spectrum disorder            | 2.41E-04 | 140  |
|       | Rice  |          |                                            |          |      |
| Rumen | straw | Positive | G1 phase                                   | 2.44E-04 | 123  |
| Rumen | Rice  | Positive | proliferation of bone marrow cells         | 2.45E-04 | 43   |



|       |       |          |                                           |          |     |
|-------|-------|----------|-------------------------------------------|----------|-----|
|       | straw |          |                                           |          |     |
|       | Rice  |          |                                           |          |     |
| Rumen | straw | Positive | quantity of bone                          | 2.51E-04 | 81  |
|       | Rice  |          |                                           |          |     |
| Rumen | straw | Positive | resorption of bone                        | 2.52E-04 | 57  |
|       | Rice  |          |                                           |          |     |
| Rumen | straw | Positive | formation of lung                         | 2.57E-04 | 97  |
|       | Rice  |          |                                           |          |     |
| Rumen | straw | Positive | cell movement of sarcoma cell lines       | 2.68E-04 | 35  |
|       | Rice  |          |                                           |          |     |
| Rumen | straw | Positive | Dermatitis                                | 2.68E-04 | 136 |
|       | Rice  |          |                                           |          |     |
| Rumen | straw | Positive | development of phagocytes                 | 2.74E-04 | 31  |
|       | Rice  |          |                                           |          |     |
| Rumen | straw | Positive | morphology of muscle                      | 2.76E-04 | 107 |
|       | Rice  |          |                                           |          |     |
| Rumen | straw | Positive | morphology of genital organ               | 2.76E-04 | 133 |
|       | Rice  |          |                                           |          |     |
| Rumen | straw | Positive | connective or soft tissue tumor           | 2.79E-04 | 214 |
|       | Rice  |          |                                           |          |     |
| Rumen | straw | Positive | cell death of hepatoma cell lines         | 2.84E-04 | 58  |
|       | Rice  |          |                                           |          |     |
| Rumen | straw | Positive | quantity of diacylglycerol                | 2.84E-04 | 24  |
|       | Rice  |          |                                           |          |     |
| Rumen | straw | Positive | cell viability of connective tissue cells | 2.84E-04 | 47  |
|       | Rice  |          |                                           |          |     |
| Rumen | straw | Positive | entry into interphase                     | 2.89E-04 | 53  |
|       | Rice  |          |                                           |          |     |
| Rumen | straw | Positive | ossification of bone                      | 2.89E-04 | 53  |
|       | Rice  |          |                                           |          |     |
| Rumen | straw | Positive | organization of actin filaments           | 2.89E-04 | 38  |
|       | Rice  |          |                                           |          |     |
| Rumen | straw | Positive | exocytosis by cells                       | 2.92E-04 | 45  |
|       | Rice  |          |                                           |          |     |
| Rumen | straw | Positive | migration of vascular endothelial cells   | 2.93E-04 | 57  |
|       | Rice  |          |                                           |          |     |
| Rumen | straw | Positive | excitatory postsynaptic potential         | 2.94E-04 | 44  |
|       | Rice  |          |                                           |          |     |
| Rumen | straw | Positive | juvenile rheumatoid arthritis             | 2.94E-04 | 44  |
|       | Rice  |          |                                           |          |     |
| Rumen | straw | Positive | proliferation of epithelial cell lines    | 2.95E-04 | 76  |
|       | Rice  |          |                                           |          |     |
| Rumen | straw | Positive | morphology of neuroglia                   | 2.96E-04 | 42  |
| Rumen | Rice  | Positive | proliferation of mononuclear leukocytes   | 3.11E-04 | 223 |

|       |       |          |                                        |          |      |
|-------|-------|----------|----------------------------------------|----------|------|
|       | straw |          |                                        |          |      |
|       | Rice  |          |                                        |          |      |
| Rumen | straw | Positive | cell death of heart                    | 3.14E-04 | 75   |
|       | Rice  |          |                                        |          |      |
| Rumen | straw | Positive | migration of cancer cells              | 3.17E-04 | 65   |
|       | Rice  |          |                                        |          |      |
| Rumen | straw | Positive | quantity of lymphatic system component | 3.18E-04 | 119  |
|       | Rice  |          |                                        |          |      |
| Rumen | straw | Positive | synthesis of triacylglycerol           | 3.21E-04 | 27   |
|       | Rice  |          |                                        |          |      |
| Rumen | straw | Positive | uterine tumor                          | 3.27E-04 | 892  |
|       | Rice  |          |                                        |          |      |
| Rumen | straw | Positive | morphology of skin                     | 3.27E-04 | 88   |
|       | Rice  |          |                                        |          |      |
| Rumen | straw | Positive | morphology of axial skeleton           | 3.28E-04 | 67   |
|       | Rice  |          |                                        |          |      |
| Rumen | straw | Positive | function of phagocytes                 | 3.28E-04 | 98   |
|       | Rice  |          |                                        |          |      |
| Rumen | straw | Positive | apoptosis of neutrophils               | 3.31E-04 | 25   |
|       | Rice  |          |                                        |          |      |
| Rumen | straw | Positive | inflammation of organ                  | 3.32E-04 | 345  |
|       | Rice  |          |                                        |          |      |
| Rumen | straw | Positive | differentiation of leukocytes          | 3.36E-04 | 204  |
|       | Rice  |          |                                        |          |      |
| Rumen | straw | Positive | differentiation of nervous system      | 3.36E-04 | 154  |
|       | Rice  |          |                                        |          |      |
| Rumen | straw | Positive | neural tube defect                     | 3.36E-04 | 53   |
|       | Rice  |          |                                        |          |      |
| Rumen | straw | Positive | death of embryo                        | 3.49E-04 | 52   |
|       | Rice  |          |                                        |          |      |
| Rumen | straw | Positive | synaptic transmission of cells         | 3.57E-04 | 81   |
|       | Rice  |          |                                        |          |      |
| Rumen | straw | Positive | neovascularization of organ            | 3.62E-04 | 40   |
|       | Rice  |          |                                        |          |      |
| Rumen | straw | Positive | abnormal morphology of cerebral cortex | 3.66E-04 | 62   |
|       | Rice  |          |                                        |          |      |
| Rumen | straw | Positive | cell movement of tumor cells           | 3.66E-04 | 62   |
|       | Rice  |          |                                        |          |      |
| Rumen | straw | Negative | proliferation of cells                 | 5.24E-46 | 1570 |
|       | Rice  |          |                                        |          |      |
| Rumen | straw | Negative | cancer                                 | 1.70E-43 | 3953 |
|       | Rice  |          |                                        |          |      |
| Rumen | straw | Negative | malignant solid tumor                  | 3.99E-41 | 3902 |
| Rumen | Rice  | Negative | organismal death                       | 7.25E-38 | 1060 |

|       |       |          |                                |          |      |
|-------|-------|----------|--------------------------------|----------|------|
|       | straw |          |                                |          |      |
|       | Rice  |          |                                |          |      |
| Rumen | straw | Negative | morbidity or mortality         | 2.02E-37 | 1070 |
|       | Rice  |          |                                |          |      |
| Rumen | straw | Negative | cell death                     | 4.96E-37 | 1400 |
|       | Rice  |          |                                |          |      |
| Rumen | straw | Negative | necrosis                       | 5.04E-32 | 1100 |
|       | Rice  |          |                                |          |      |
| Rumen | straw | Negative | morphology of cells            | 3.19E-30 | 860  |
|       | Rice  |          |                                |          |      |
| Rumen | straw | Negative | apoptosis                      | 2.69E-29 | 1113 |
|       | Rice  |          |                                |          |      |
| Rumen | straw | Negative | cell movement                  | 2.97E-25 | 906  |
|       | Rice  |          |                                |          |      |
| Rumen | straw | Negative | organization of cytoplasm      | 1.01E-24 | 681  |
|       | Rice  |          |                                |          |      |
| Rumen | straw | Negative | transport of molecule          | 3.14E-24 | 709  |
|       | Rice  |          |                                |          |      |
| Rumen | straw | Negative | abdominal neoplasm             | 5.03E-24 | 3199 |
|       | Rice  |          |                                |          |      |
| Rumen | straw | Negative | tumorigenesis of tissue        | 4.61E-23 | 3264 |
|       | Rice  |          |                                |          |      |
| Rumen | straw | Negative | neoplasia of epithelial tissue | 3.00E-22 | 3210 |
|       | Rice  |          |                                |          |      |
| Rumen | straw | Negative | abdominal cancer               | 3.82E-22 | 3153 |
|       | Rice  |          |                                |          |      |
| Rumen | straw | Negative | cell survival                  | 1.74E-21 | 614  |
|       | Rice  |          |                                |          |      |
| Rumen | straw | Negative | epithelial cancer              | 3.42E-21 | 3175 |
|       | Rice  |          |                                |          |      |
| Rumen | straw | Negative | cell viability                 | 4.24E-21 | 577  |
|       | Rice  |          |                                |          |      |
| Rumen | straw | Negative | cell death of tumor cell lines | 4.86E-21 | 662  |
|       | Rice  |          |                                |          |      |
| Rumen | straw | Negative | migration of cells             | 8.13E-21 | 801  |
|       | Rice  |          |                                |          |      |
| Rumen | straw | Negative | organization of cytoskeleton   | 1.07E-20 | 611  |
|       | Rice  |          |                                |          |      |
| Rumen | straw | Negative | digestive organ tumor          | 1.91E-20 | 2771 |
|       | Rice  |          |                                |          |      |
| Rumen | straw | Negative | digestive system cancer        | 1.99E-20 | 2747 |
|       | Rice  |          |                                |          |      |
| Rumen | straw | Negative | cellular homeostasis           | 1.81E-19 | 653  |
| Rumen | Rice  | Negative | expression of RNA              | 6.31E-19 | 880  |

|       |       |          |                                     |          |     |
|-------|-------|----------|-------------------------------------|----------|-----|
|       | straw |          |                                     |          |     |
|       | Rice  |          |                                     |          |     |
| Rumen | straw | Negative | differentiation of cells            | 1.28E-18 | 916 |
|       | Rice  |          |                                     |          |     |
| Rumen | straw | Negative | abnormal morphology of cells        | 1.77E-18 | 552 |
|       | Rice  |          |                                     |          |     |
| Rumen | straw | Negative | angiogenesis                        | 1.18E-17 | 411 |
|       | Rice  |          |                                     |          |     |
| Rumen | straw | Negative | transcription                       | 1.73E-17 | 817 |
|       | Rice  |          |                                     |          |     |
| Rumen | straw | Negative | microtubule dynamics                | 2.54E-17 | 516 |
|       | Rice  |          |                                     |          |     |
| Rumen | straw | Negative | transcription of RNA                | 3.97E-17 | 765 |
|       | Rice  |          |                                     |          |     |
| Rumen | straw | Negative | apoptosis of tumor cell lines       | 4.92E-17 | 525 |
|       | Rice  |          |                                     |          |     |
| Rumen | straw | Negative | morphology of cardiovascular system | 7.51E-17 | 293 |
|       | Rice  |          |                                     |          |     |
| Rumen | straw | Negative | vasculogenesis                      | 3.43E-16 | 338 |
|       | Rice  |          |                                     |          |     |
| Rumen | straw | Negative | synthesis of lipid                  | 2.94E-14 | 322 |
|       | Rice  |          |                                     |          |     |
| Rumen | straw | Negative | perinatal death                     | 2.94E-14 | 274 |
|       | Rice  |          |                                     |          |     |
| Rumen | straw | Negative | morphology of body cavity           | 4.98E-14 | 505 |
|       | Rice  |          |                                     |          |     |
| Rumen | straw | Negative | formation of cellular protrusions   | 6.49E-14 | 394 |
|       | Rice  |          |                                     |          |     |
| Rumen | straw | Negative | development of body trunk           | 7.14E-14 | 475 |
|       | Rice  |          |                                     |          |     |
| Rumen | straw | Negative | concentration of lipid              | 8.06E-14 | 358 |
|       | Rice  |          |                                     |          |     |
| Rumen | straw | Negative | quantity of cells                   | 8.06E-14 | 714 |
|       | Rice  |          |                                     |          |     |
| Rumen | straw | Negative | transcription of DNA                | 9.43E-14 | 629 |
|       | Rice  |          |                                     |          |     |
| Rumen | straw | Negative | cell movement of tumor cell lines   | 1.17E-13 | 373 |
|       | Rice  |          |                                     |          |     |
| Rumen | straw | Negative | size of body                        | 1.70E-13 | 372 |
|       | Rice  |          |                                     |          |     |
| Rumen | straw | Negative | phosphorylation of protein          | 1.70E-13 | 327 |
|       | Rice  |          |                                     |          |     |
| Rumen | straw | Negative | proliferation of tumor cell lines   | 1.71E-13 | 632 |
| Rumen | Rice  | Negative | Movement Disorders                  | 1.94E-13 | 451 |

|       |       |          |                                              |          |     |
|-------|-------|----------|----------------------------------------------|----------|-----|
|       | straw |          |                                              |          |     |
|       | Rice  |          |                                              |          |     |
| Rumen | straw | Negative | abnormal morphology of epithelial tissue     | 2.34E-13 | 199 |
|       | Rice  |          |                                              |          |     |
| Rumen | straw | Negative | cell viability of tumor cell lines           | 8.66E-13 | 341 |
|       | Rice  |          |                                              |          |     |
| Rumen | straw | Negative | development of cytoplasm                     | 1.88E-12 | 214 |
|       | Rice  |          |                                              |          |     |
| Rumen | straw | Negative | abnormal morphology of cardiovascular system | 2.53E-12 | 256 |
|       | Rice  |          |                                              |          |     |
| Rumen | straw | Negative | cell death of connective tissue cells        | 2.53E-12 | 270 |
|       | Rice  |          |                                              |          |     |
| Rumen | straw | Negative | growth of organism                           | 2.66E-12 | 361 |
|       | Rice  |          |                                              |          |     |
| Rumen | straw | Negative | abnormal morphology of body cavity           | 3.03E-12 | 476 |
|       | Rice  |          |                                              |          |     |
| Rumen | straw | Negative | abnormal morphology of thoracic cavity       | 6.45E-12 | 262 |
|       | Rice  |          |                                              |          |     |
| Rumen | straw | Negative | organization of organelle                    | 7.21E-12 | 243 |
|       | Rice  |          |                                              |          |     |
| Rumen | straw | Negative | interphase                                   | 8.16E-12 | 289 |
|       | Rice  |          |                                              |          |     |
| Rumen | straw | Negative | neurological signs                           | 8.37E-12 | 287 |
|       | Rice  |          |                                              |          |     |
| Rumen | straw | Negative | morphology of heart                          | 1.47E-11 | 188 |
|       | Rice  |          |                                              |          |     |
| Rumen | straw | Negative | transactivation                              | 1.66E-11 | 257 |
|       | Rice  |          |                                              |          |     |
| Rumen | straw | Negative | necrosis of epithelial tissue                | 1.82E-11 | 261 |
|       | Rice  |          |                                              |          |     |
| Rumen | straw | Negative | protein kinase cascade                       | 1.88E-11 | 194 |
|       | Rice  |          |                                              |          |     |
| Rumen | straw | Negative | quantity of blood cells                      | 2.06E-11 | 429 |
|       | Rice  |          |                                              |          |     |
| Rumen | straw | Negative | quantity of leukocytes                       | 2.17E-11 | 387 |
|       | Rice  |          |                                              |          |     |
| Rumen | straw | Negative | quantity of connective tissue                | 2.40E-11 | 266 |
|       | Rice  |          |                                              |          |     |
| Rumen | straw | Negative | dyskinesia                                   | 3.20E-11 | 271 |
|       | Rice  |          |                                              |          |     |
| Rumen | straw | Negative | development of vasculature                   | 3.20E-11 | 192 |
|       | Rice  |          |                                              |          |     |
| Rumen | straw | Negative | disorder of basal ganglia                    | 3.69E-11 | 329 |
| Rumen | Rice  | Negative | abnormal morphology of head                  | 4.02E-11 | 354 |

|       |       |          |                                          |          |     |
|-------|-------|----------|------------------------------------------|----------|-----|
|       | straw |          |                                          |          |     |
|       | Rice  |          |                                          |          |     |
| Rumen | straw | Negative | invasion of cells                        | 6.92E-11 | 367 |
|       | Rice  |          |                                          |          |     |
| Rumen | straw | Negative | cell death of epithelial cells           | 8.10E-11 | 222 |
|       | Rice  |          |                                          |          |     |
| Rumen | straw | Negative | morphology of head                       | 8.16E-11 | 369 |
|       | Rice  |          |                                          |          |     |
| Rumen | straw | Negative | cell death of cervical cancer cell lines | 8.90E-11 | 163 |
|       | Rice  |          |                                          |          |     |
| Rumen | straw | Negative | chorea                                   | 1.11E-10 | 253 |
|       | Rice  |          |                                          |          |     |
| Rumen | straw | Negative | Huntington's Disease                     | 1.22E-10 | 252 |
|       | Rice  |          |                                          |          |     |
| Rumen | straw | Negative | morphology of connective tissue          | 2.12E-10 | 206 |
|       | Rice  |          |                                          |          |     |
| Rumen | straw | Negative | Growth Failure                           | 2.67E-10 | 260 |
|       | Rice  |          |                                          |          |     |
| Rumen | straw | Negative | transactivation of RNA                   | 3.48E-10 | 238 |
|       | Rice  |          |                                          |          |     |
| Rumen | straw | Negative | formation of cytoskeleton                | 4.47E-10 | 171 |
|       | Rice  |          |                                          |          |     |
| Rumen | straw | Negative | abnormal morphology of abdomen           | 5.87E-10 | 365 |
|       | Rice  |          |                                          |          |     |
| Rumen | straw | Negative | proliferation of blood cells             | 6.01E-10 | 352 |
|       | Rice  |          |                                          |          |     |
| Rumen | straw | Negative | activation of DNA endogenous promoter    | 6.83E-10 | 488 |
|       | Rice  |          |                                          |          |     |
| Rumen | straw | Negative | migration of tumor cell lines            | 6.84E-10 | 300 |
|       | Rice  |          |                                          |          |     |
| Rumen | straw | Negative | proliferation of connective tissue cells | 6.93E-10 | 256 |
|       | Rice  |          |                                          |          |     |
| Rumen | straw | Negative | cell movement of blood cells             | 6.93E-10 | 364 |
|       | Rice  |          |                                          |          |     |
| Rumen | straw | Negative | cell transformation                      | 6.98E-10 | 204 |
|       | Rice  |          |                                          |          |     |
| Rumen | straw | Negative | migration of blood cells                 | 7.48E-10 | 363 |
|       | Rice  |          |                                          |          |     |
| Rumen | straw | Negative | apoptosis of cervical cancer cell lines  | 7.54E-10 | 132 |
|       | Rice  |          |                                          |          |     |
| Rumen | straw | Negative | metabolism of protein                    | 8.92E-10 | 400 |
|       | Rice  |          |                                          |          |     |
| Rumen | straw | Negative | leukocyte migration                      | 9.06E-10 | 362 |
| Rumen | Rice  | Negative | cell death of epithelial cell lines      | 9.29E-10 | 132 |

|       |       |          |                                           |          |     |
|-------|-------|----------|-------------------------------------------|----------|-----|
|       | straw |          |                                           |          |     |
|       | Rice  |          |                                           |          |     |
| Rumen | straw | Negative | growth of epithelial tissue               | 9.29E-10 | 289 |
|       | Rice  |          |                                           |          |     |
| Rumen | straw | Negative | development of body axis                  | 9.82E-10 | 429 |
|       | Rice  |          |                                           |          |     |
| Rumen | straw | Negative | growth of connective tissue               | 1.02E-09 | 275 |
|       | Rice  |          |                                           |          |     |
| Rumen | straw | Negative | Viral Infection                           | 1.13E-09 | 631 |
|       | Rice  |          |                                           |          |     |
| Rumen | straw | Negative | morphology of nervous system              | 1.20E-09 | 328 |
|       | Rice  |          |                                           |          |     |
| Rumen | straw | Negative | proliferation of neuronal cells           | 1.36E-09 | 248 |
|       | Rice  |          |                                           |          |     |
| Rumen | straw | Negative | concentration of fatty acid               | 1.67E-09 | 130 |
|       | Rice  |          |                                           |          |     |
| Rumen | straw | Negative | formation of muscle                       | 1.89E-09 | 177 |
|       | Rice  |          |                                           |          |     |
| Rumen | straw | Negative | growth of muscle tissue                   | 2.68E-09 | 167 |
|       | Rice  |          |                                           |          |     |
| Rumen | straw | Negative | abnormal morphology of heart              | 2.70E-09 | 171 |
|       | Rice  |          |                                           |          |     |
| Rumen | straw | Negative | activation of enzyme                      | 2.70E-09 | 173 |
|       | Rice  |          |                                           |          |     |
| Rumen | straw | Negative | proliferation of muscle cells             | 2.86E-09 | 166 |
|       | Rice  |          |                                           |          |     |
| Rumen | straw | Negative | development of head                       | 3.06E-09 | 400 |
|       | Rice  |          |                                           |          |     |
| Rumen | straw | Negative | neuronal cell death                       | 3.10E-09 | 287 |
|       | Rice  |          |                                           |          |     |
| Rumen | straw | Negative | autophagy                                 | 3.78E-09 | 167 |
|       | Rice  |          |                                           |          |     |
| Rumen | straw | Negative | growth of embryo                          | 4.93E-09 | 207 |
|       | Rice  |          |                                           |          |     |
| Rumen | straw | Negative | proliferation of immune cells             | 5.01E-09 | 328 |
|       | Rice  |          |                                           |          |     |
| Rumen | straw | Negative | survival of organism                      | 5.78E-09 | 294 |
|       | Rice  |          |                                           |          |     |
| Rumen | straw | Negative | morphology of respiratory system          | 6.11E-09 | 141 |
|       | Rice  |          |                                           |          |     |
| Rumen | straw | Negative | abnormal morphology of nervous system     | 6.45E-09 | 302 |
|       | Rice  |          |                                           |          |     |
| Rumen | straw | Negative | ubiquitination                            | 7.10E-09 | 151 |
| Rumen | Rice  | Negative | abnormal morphology of respiratory system | 7.10E-09 | 139 |

|       |       |          |                                         |          |      |
|-------|-------|----------|-----------------------------------------|----------|------|
|       | straw |          |                                         |          |      |
|       | Rice  |          |                                         |          |      |
| Rumen | straw | Negative | invasion of tumor cell lines            | 7.37E-09 | 279  |
|       | Rice  |          |                                         |          |      |
| Rumen | straw | Negative | neuromuscular disease                   | 7.82E-09 | 361  |
|       | Rice  |          |                                         |          |      |
| Rumen | straw | Negative | neonatal death                          | 9.53E-09 | 191  |
|       | Rice  |          |                                         |          |      |
| Rumen | straw | Negative | morphology of bone                      | 1.07E-08 | 195  |
|       | Rice  |          |                                         |          |      |
| Rumen | straw | Negative | function of cardiovascular system       | 1.34E-08 | 163  |
|       | Rice  |          |                                         |          |      |
| Rumen | straw | Negative | ubiquitination of protein               | 1.34E-08 | 148  |
|       | Rice  |          |                                         |          |      |
| Rumen | straw | Negative | autosomal recessive disease             | 1.34E-08 | 374  |
|       | Rice  |          |                                         |          |      |
| Rumen | straw | Negative | breast or colorectal cancer             | 1.61E-08 | 1802 |
|       | Rice  |          |                                         |          |      |
| Rumen | straw | Negative | cell death of blood cells               | 1.61E-08 | 288  |
|       | Rice  |          |                                         |          |      |
| Rumen | straw | Negative | metabolism of carbohydrate              | 2.02E-08 | 260  |
|       | Rice  |          |                                         |          |      |
| Rumen | straw | Negative | fatty acid metabolism                   | 2.22E-08 | 252  |
|       | Rice  |          |                                         |          |      |
| Rumen | straw | Negative | secretion of molecule                   | 2.25E-08 | 233  |
|       | Rice  |          |                                         |          |      |
| Rumen | straw | Negative | dysgenesis                              | 2.75E-08 | 228  |
|       | Rice  |          |                                         |          |      |
| Rumen | straw | Negative | abnormal morphology of bone             | 2.80E-08 | 188  |
|       | Rice  |          |                                         |          |      |
| Rumen | straw | Negative | quantity of lymphocytes                 | 2.92E-08 | 292  |
|       | Rice  |          |                                         |          |      |
| Rumen | straw | Negative | degeneration of nervous system          | 2.93E-08 | 129  |
|       | Rice  |          |                                         |          |      |
| Rumen | straw | Negative | Organ Degeneration                      | 3.00E-08 | 210  |
|       | Rice  |          |                                         |          |      |
| Rumen | straw | Negative | cell movement of leukocytes             | 3.48E-08 | 314  |
|       | Rice  |          |                                         |          |      |
| Rumen | straw | Negative | quantity of mononuclear leukocytes      | 3.72E-08 | 302  |
|       | Rice  |          |                                         |          |      |
| Rumen | straw | Negative | accumulation of lipid                   | 4.78E-08 | 133  |
|       | Rice  |          |                                         |          |      |
| Rumen | straw | Negative | morphology of digestive system          | 4.96E-08 | 239  |
| Rumen | Rice  | Negative | abnormal morphology of embryonic tissue | 5.12E-08 | 230  |



|       |       |          |                                              |          |     |
|-------|-------|----------|----------------------------------------------|----------|-----|
|       | straw |          |                                              |          |     |
|       | Rice  |          |                                              |          |     |
| Rumen | straw | Negative | apoptosis of epithelial cell lines           | 5.50E-08 | 103 |
|       | Rice  |          |                                              |          |     |
| Rumen | straw | Negative | proliferation of mononuclear leukocytes      | 5.88E-08 | 302 |
|       | Rice  |          |                                              |          |     |
| Rumen | straw | Negative | cell death of fibroblast cell lines          | 5.99E-08 | 183 |
|       | Rice  |          |                                              |          |     |
| Rumen | straw | Negative | Hypoplasia                                   | 6.18E-08 | 213 |
|       | Rice  |          |                                              |          |     |
| Rumen | straw | Negative | engulfment of cells                          | 6.59E-08 | 175 |
|       | Rice  |          |                                              |          |     |
| Rumen | straw | Negative | abnormal morphology of digestive system      | 6.94E-08 | 228 |
|       | Rice  |          |                                              |          |     |
| Rumen | straw | Negative | formation of cells                           | 8.09E-08 | 392 |
|       | Rice  |          |                                              |          |     |
| Rumen | straw | Negative | proliferation of lymphocytes                 | 8.15E-08 | 297 |
|       | Rice  |          |                                              |          |     |
| Rumen | straw | Negative | development of abdomen                       | 8.82E-08 | 241 |
|       | Rice  |          |                                              |          |     |
| Rumen | straw | Negative | development of lymphatic system component    | 9.51E-08 | 136 |
|       | Rice  |          |                                              |          |     |
| Rumen | straw | Negative | fibrogenesis                                 | 9.61E-08 | 176 |
|       | Rice  |          |                                              |          |     |
| Rumen | straw | Negative | congenital anomaly of musculoskeletal system | 9.62E-08 | 300 |
|       | Rice  |          |                                              |          |     |
| Rumen | straw | Negative | cell cycle progression                       | 1.28E-07 | 414 |
|       | Rice  |          |                                              |          |     |
| Rumen | straw | Negative | cardiogenesis                                | 1.28E-07 | 199 |
|       | Rice  |          |                                              |          |     |
| Rumen | straw | Negative | autosomal dominant disease                   | 1.35E-07 | 262 |
|       | Rice  |          |                                              |          |     |
| Rumen | straw | Negative | adhesion of tumor cell lines                 | 1.38E-07 | 127 |
|       | Rice  |          |                                              |          |     |
| Rumen | straw | Negative | seizure disorder                             | 1.38E-07 | 198 |
|       | Rice  |          |                                              |          |     |
| Rumen | straw | Negative | growth of embryonic tissue                   | 1.39E-07 | 122 |
|       | Rice  |          |                                              |          |     |
| Rumen | straw | Negative | differentiation of connective tissue cells   | 1.40E-07 | 264 |
|       | Rice  |          |                                              |          |     |
| Rumen | straw | Negative | cell death of immune cells                   | 1.65E-07 | 270 |
|       | Rice  |          |                                              |          |     |
| Rumen | straw | Negative | development of digestive system              | 1.77E-07 | 164 |
| Rumen | Rice  | Negative | Neurodegeneration                            | 1.78E-07 | 135 |

|       |       |          |                                         |          |      |
|-------|-------|----------|-----------------------------------------|----------|------|
|       | straw |          |                                         |          |      |
|       | Rice  |          |                                         |          |      |
| Rumen | straw | Negative | differentiation of connective tissue    | 1.89E-07 | 296  |
|       | Rice  |          |                                         |          |      |
| Rumen | straw | Negative | function of blood cells                 | 1.89E-07 | 242  |
|       | Rice  |          |                                         |          |      |
| Rumen | straw | Negative | proliferation of fibroblasts            | 1.90E-07 | 152  |
|       | Rice  |          |                                         |          |      |
| Rumen | straw | Negative | morphology of vessel                    | 1.90E-07 | 134  |
|       | Rice  |          |                                         |          |      |
| Rumen | straw | Negative | function of leukocytes                  | 2.05E-07 | 223  |
|       | Rice  |          |                                         |          |      |
| Rumen | straw | Negative | cell death of muscle cells              | 2.12E-07 | 145  |
|       | Rice  |          |                                         |          |      |
| Rumen | straw | Negative | quantity of lymphoid organ              | 2.28E-07 | 134  |
|       | Rice  |          |                                         |          |      |
| Rumen | straw | Negative | formation of filaments                  | 2.41E-07 | 169  |
|       | Rice  |          |                                         |          |      |
| Rumen | straw | Negative | quantity of lymphatic system component  | 2.67E-07 | 161  |
|       | Rice  |          |                                         |          |      |
| Rumen | straw | Negative | endocytosis                             | 3.26E-07 | 148  |
|       | Rice  |          |                                         |          |      |
| Rumen | straw | Negative | quantity of T lymphocytes               | 3.69E-07 | 221  |
|       | Rice  |          |                                         |          |      |
| Rumen | straw | Negative | cell spreading                          | 4.03E-07 | 121  |
|       | Rice  |          |                                         |          |      |
| Rumen | straw | Negative | development of lymphatic system         | 4.46E-07 | 152  |
|       | Rice  |          |                                         |          |      |
| Rumen | straw | Negative | proliferation of embryonic cells        | 4.48E-07 | 110  |
|       | Rice  |          |                                         |          |      |
| Rumen | straw | Negative | metabolism of membrane lipid derivative | 4.51E-07 | 164  |
|       | Rice  |          |                                         |          |      |
| Rumen | straw | Negative | arrest in interphase                    | 4.74E-07 | 175  |
|       | Rice  |          |                                         |          |      |
| Rumen | straw | Negative | Bleeding                                | 4.81E-07 | 178  |
|       | Rice  |          |                                         |          |      |
| Rumen | straw | Negative | mass of connective tissue               | 4.82E-07 | 91   |
|       | Rice  |          |                                         |          |      |
| Rumen | straw | Negative | binding of DNA                          | 4.82E-07 | 215  |
|       | Rice  |          |                                         |          |      |
| Rumen | straw | Negative | hepatocellular carcinoma                | 4.82E-07 | 1515 |
|       | Rice  |          |                                         |          |      |
| Rumen | straw | Negative | cell death of muscle                    | 4.82E-07 | 147  |
| Rumen | Rice  | Negative | catabolism of protein                   | 4.82E-07 | 246  |

|       |       |          |                                          |          |      |
|-------|-------|----------|------------------------------------------|----------|------|
|       | straw |          |                                          |          |      |
|       | Rice  |          |                                          |          |      |
| Rumen | straw | Negative | hepatobiliary system cancer              | 4.82E-07 | 1569 |
|       | Rice  |          |                                          |          |      |
| Rumen | straw | Negative | formation of filopodia                   | 5.06E-07 | 77   |
|       | Rice  |          |                                          |          |      |
| Rumen | straw | Negative | proliferation of smooth muscle cells     | 5.26E-07 | 124  |
|       | Rice  |          |                                          |          |      |
| Rumen | straw | Negative | synthesis of DNA                         | 5.26E-07 | 175  |
|       | Rice  |          |                                          |          |      |
| Rumen | straw | Negative | replication of virus                     | 5.41E-07 | 230  |
|       | Rice  |          |                                          |          |      |
| Rumen | straw | Negative | morphology of cardiovascular tissue      | 6.06E-07 | 45   |
|       | Rice  |          |                                          |          |      |
| Rumen | straw | Negative | necrosis of muscle                       | 6.16E-07 | 146  |
|       | Rice  |          |                                          |          |      |
| Rumen | straw | Negative | gastrointestinal tract cancer            | 6.45E-07 | 1814 |
|       | Rice  |          |                                          |          |      |
| Rumen | straw | Negative | activation of cells                      | 7.05E-07 | 384  |
|       | Rice  |          |                                          |          |      |
| Rumen | straw | Negative | abnormal morphology of skeleton          | 7.22E-07 | 118  |
|       | Rice  |          |                                          |          |      |
| Rumen | straw | Negative | liver tumor                              | 7.37E-07 | 1570 |
|       | Rice  |          |                                          |          |      |
| Rumen | straw | Negative | liver cancer                             | 7.39E-07 | 1560 |
|       | Rice  |          |                                          |          |      |
| Rumen | straw | Negative | apoptosis of fibroblast cell lines       | 7.46E-07 | 140  |
|       | Rice  |          |                                          |          |      |
| Rumen | straw | Negative | Gastrointestinal Tract Cancer and Tumors | 8.02E-07 | 1841 |
|       | Rice  |          |                                          |          |      |
| Rumen | straw | Negative | morphology of skeleton                   | 8.04E-07 | 121  |
|       | Rice  |          |                                          |          |      |
| Rumen | straw | Negative | cell death of kidney cells               | 8.22E-07 | 148  |
|       | Rice  |          |                                          |          |      |
| Rumen | straw | Negative | proliferation of epithelial cells        | 8.22E-07 | 203  |
|       | Rice  |          |                                          |          |      |
| Rumen | straw | Negative | replication of RNA virus                 | 8.74E-07 | 208  |
|       | Rice  |          |                                          |          |      |
| Rumen | straw | Negative | cell death of kidney cell lines          | 9.00E-07 | 130  |
|       | Rice  |          |                                          |          |      |
| Rumen | straw | Negative | respiratory system development           | 9.09E-07 | 145  |
|       | Rice  |          |                                          |          |      |
| Rumen | straw | Negative | activation of Protein kinase             | 9.26E-07 | 110  |
| Rumen | Rice  | Negative | formation of lung                        | 9.76E-07 | 129  |

|       |       |          |                                       |          |     |
|-------|-------|----------|---------------------------------------|----------|-----|
|       | straw |          |                                       |          |     |
|       | Rice  |          |                                       |          |     |
| Rumen | straw | Negative | Hypertrophy                           | 1.15E-06 | 195 |
|       | Rice  |          |                                       |          |     |
| Rumen | straw | Negative | peripheral arterial disease           | 1.15E-06 | 94  |
|       | Rice  |          |                                       |          |     |
| Rumen | straw | Negative | cell movement of endothelial cells    | 1.20E-06 | 149 |
|       | Rice  |          |                                       |          |     |
| Rumen | straw | Negative | mass of adipose tissue                | 1.39E-06 | 85  |
|       | Rice  |          |                                       |          |     |
| Rumen | straw | Negative | behavior                              | 1.40E-06 | 386 |
|       | Rice  |          |                                       |          |     |
| Rumen | straw | Negative | development of epithelial tissue      | 1.41E-06 | 211 |
|       | Rice  |          |                                       |          |     |
| Rumen | straw | Negative | apoptosis of neurons                  | 1.55E-06 | 180 |
|       | Rice  |          |                                       |          |     |
| Rumen | straw | Negative | growth of neurites                    | 1.59E-06 | 190 |
|       | Rice  |          |                                       |          |     |
| Rumen | straw | Negative | formation of eye                      | 1.61E-06 | 181 |
|       | Rice  |          |                                       |          |     |
| Rumen | straw | Negative | morphology of skin                    | 1.61E-06 | 117 |
|       | Rice  |          |                                       |          |     |
| Rumen | straw | Negative | differentiation of muscle cell lines  | 1.62E-06 | 74  |
|       | Rice  |          |                                       |          |     |
| Rumen | straw | Negative | vascularization                       | 1.62E-06 | 103 |
|       | Rice  |          |                                       |          |     |
| Rumen | straw | Negative | autophagy of cells                    | 1.72E-06 | 114 |
|       | Rice  |          |                                       |          |     |
| Rumen | straw | Negative | homing of cells                       | 1.73E-06 | 226 |
|       | Rice  |          |                                       |          |     |
| Rumen | straw | Negative | function of muscle                    | 1.82E-06 | 146 |
|       | Rice  |          |                                       |          |     |
| Rumen | straw | Negative | benign neoplasia                      | 1.86E-06 | 362 |
|       | Rice  |          |                                       |          |     |
| Rumen | straw | Negative | proliferation of hematopoietic cells  | 1.99E-06 | 110 |
|       | Rice  |          |                                       |          |     |
| Rumen | straw | Negative | synthesis of fatty acid               | 2.06E-06 | 132 |
|       | Rice  |          |                                       |          |     |
| Rumen | straw | Negative | function of smooth muscle             | 2.06E-06 | 46  |
|       | Rice  |          |                                       |          |     |
| Rumen | straw | Negative | cell movement of fibroblasts          | 2.08E-06 | 82  |
|       | Rice  |          |                                       |          |     |
| Rumen | straw | Negative | growth of plasma membrane projections | 2.09E-06 | 191 |
| Rumen | Rice  | Negative | morphology of reproductive system     | 2.11E-06 | 217 |

|       |       |          |                                            |          |     |
|-------|-------|----------|--------------------------------------------|----------|-----|
|       | straw |          |                                            |          |     |
|       | Rice  |          |                                            |          |     |
| Rumen | straw | Negative | neuritogenesis                             | 2.15E-06 | 235 |
|       | Rice  |          |                                            |          |     |
| Rumen | straw | Negative | transformation of fibroblast cell lines    | 2.16E-06 | 111 |
|       | Rice  |          |                                            |          |     |
| Rumen | straw | Negative | migration of connective tissue cells       | 2.18E-06 | 81  |
|       | Rice  |          |                                            |          |     |
| Rumen | straw | Negative | abnormal morphology of reproductive system | 2.19E-06 | 207 |
|       | Rice  |          |                                            |          |     |
| Rumen | straw | Negative | morphology of endothelial tissue           | 2.40E-06 | 42  |
|       | Rice  |          |                                            |          |     |
| Rumen | straw | Negative | polymerization of protein                  | 2.49E-06 | 154 |
|       | Rice  |          |                                            |          |     |
| Rumen | straw | Negative | cognition                                  | 2.49E-06 | 186 |
|       | Rice  |          |                                            |          |     |
| Rumen | straw | Negative | seizures                                   | 2.51E-06 | 165 |
|       | Rice  |          |                                            |          |     |
| Rumen | straw | Negative | cell movement of connective tissue cells   | 2.52E-06 | 97  |
|       | Rice  |          |                                            |          |     |
| Rumen | straw | Negative | small GTPase mediated signal transduction  | 2.55E-06 | 82  |
|       | Rice  |          |                                            |          |     |
| Rumen | straw | Negative | phosphorylation of L-amino acid            | 2.72E-06 | 96  |
|       | Rice  |          |                                            |          |     |
| Rumen | straw | Negative | morphology of central nervous system       | 2.87E-06 | 208 |
|       | Rice  |          |                                            |          |     |
| Rumen | straw | Negative | differentiation of embryonic tissue        | 3.05E-06 | 109 |
|       | Rice  |          |                                            |          |     |
| Rumen | straw | Negative | interphase of tumor cell lines             | 3.13E-06 | 153 |
|       | Rice  |          |                                            |          |     |
| Rumen | straw | Negative | shape change of tumor cell lines           | 3.24E-06 | 70  |
|       | Rice  |          |                                            |          |     |
| Rumen | straw | Negative | morphology of genital organ                | 3.32E-06 | 174 |
|       | Rice  |          |                                            |          |     |
| Rumen | straw | Negative | synthesis of reactive oxygen species       | 3.46E-06 | 195 |
|       | Rice  |          |                                            |          |     |
| Rumen | straw | Negative | transport of alpha-amino acid              | 3.55E-06 | 37  |
|       | Rice  |          |                                            |          |     |
| Rumen | straw | Negative | cellular infiltration                      | 3.57E-06 | 179 |
|       | Rice  |          |                                            |          |     |
| Rumen | straw | Negative | transport of protein                       | 3.65E-06 | 127 |
|       | Rice  |          |                                            |          |     |
| Rumen | straw | Negative | abnormal morphology of endothelial tissue  | 3.77E-06 | 34  |
| Rumen | Rice  | Negative | peripheral vascular disease                | 3.85E-06 | 157 |

|       |       |          |                                                 |          |     |
|-------|-------|----------|-------------------------------------------------|----------|-----|
|       | straw |          |                                                 |          |     |
|       | Rice  |          |                                                 |          |     |
| Rumen | straw | Negative | epileptic seizure                               | 3.98E-06 | 75  |
|       | Rice  |          |                                                 |          |     |
| Rumen | straw | Negative | homing                                          | 4.07E-06 | 230 |
|       | Rice  |          |                                                 |          |     |
| Rumen | straw | Negative | quantity of carbohydrate                        | 4.17E-06 | 209 |
|       | Rice  |          |                                                 |          |     |
| Rumen | straw | Negative | cell death of sarcoma cell lines                | 4.18E-06 | 98  |
|       | Rice  |          |                                                 |          |     |
| Rumen | straw | Negative | differentiation of muscle                       | 4.25E-06 | 127 |
|       | Rice  |          |                                                 |          |     |
| Rumen | straw | Negative | neovascularization                              | 4.46E-06 | 73  |
|       | Rice  |          |                                                 |          |     |
| Rumen | straw | Negative | proliferation of hematopoietic progenitor cells | 4.54E-06 | 104 |
|       | Rice  |          |                                                 |          |     |
| Rumen | straw | Negative | proliferation of T lymphocytes                  | 4.58E-06 | 241 |
|       | Rice  |          |                                                 |          |     |
| Rumen | straw | Negative | proliferation of fibroblast cell lines          | 4.63E-06 | 173 |
|       | Rice  |          |                                                 |          |     |
| Rumen | straw | Negative | development of blood cells                      | 4.63E-06 | 259 |
|       | Rice  |          |                                                 |          |     |
| Rumen | straw | Negative | Dermatitis                                      | 4.75E-06 | 177 |
|       | Rice  |          |                                                 |          |     |
| Rumen | straw | Negative | formation of plasma membrane projections        | 4.75E-06 | 238 |
|       | Rice  |          |                                                 |          |     |
| Rumen | straw | Negative | cell death of embryonic cell lines              | 4.86E-06 | 103 |
|       | Rice  |          |                                                 |          |     |
| Rumen | straw | Negative | cell death of heart cells                       | 5.23E-06 | 95  |
|       | Rice  |          |                                                 |          |     |
| Rumen | straw | Negative | glandular intraepithelial neoplasm              | 5.23E-06 | 58  |
|       | Rice  |          |                                                 |          |     |
| Rumen | straw | Negative | cellular infiltration by leukocytes             | 5.51E-06 | 159 |
|       | Rice  |          |                                                 |          |     |
| Rumen | straw | Negative | apoptosis of epithelial cells                   | 5.57E-06 | 120 |
|       | Rice  |          |                                                 |          |     |
| Rumen | straw | Negative | disorder of lipid metabolism                    | 5.65E-06 | 86  |
|       | Rice  |          |                                                 |          |     |
| Rumen | straw | Negative | stress response of cells                        | 5.71E-06 | 63  |
|       | Rice  |          |                                                 |          |     |
| Rumen | straw | Negative | development of cardiovascular tissue            | 5.87E-06 | 152 |
|       | Rice  |          |                                                 |          |     |
| Rumen | straw | Negative | synthesis of carbohydrate                       | 5.92E-06 | 173 |
| Rumen | Rice  | Negative | damage of epithelial tissue                     | 5.98E-06 | 50  |

|       |       |          |                                          |          |      |
|-------|-------|----------|------------------------------------------|----------|------|
|       | straw |          |                                          |          |      |
|       | Rice  |          |                                          |          |      |
| Rumen | straw | Negative | necrosis of kidney                       | 6.05E-06 | 150  |
|       | Rice  |          |                                          |          |      |
| Rumen | straw | Negative | growth of tumor                          | 6.43E-06 | 311  |
|       | Rice  |          |                                          |          |      |
| Rumen | straw | Negative | growth of lymphatic system component     | 6.49E-06 | 84   |
|       | Rice  |          |                                          |          |      |
| Rumen | straw | Negative | breast or ovarian cancer                 | 6.69E-06 | 709  |
|       | Rice  |          |                                          |          |      |
| Rumen | straw | Negative | formation of actin filaments             | 6.69E-06 | 127  |
|       | Rice  |          |                                          |          |      |
| Rumen | straw | Negative | morphology of brain                      | 6.97E-06 | 188  |
|       | Rice  |          |                                          |          |      |
| Rumen | straw | Negative | cellular infiltration of cells           | 7.13E-06 | 162  |
|       | Rice  |          |                                          |          |      |
| Rumen | straw | Negative | adenocarcinoma                           | 7.69E-06 | 2293 |
|       | Rice  |          |                                          |          |      |
| Rumen | straw | Negative | apoptosis of blood cells                 | 7.71E-06 | 199  |
|       | Rice  |          |                                          |          |      |
| Rumen | straw | Negative | differentiation of muscle cells          | 7.71E-06 | 118  |
|       | Rice  |          |                                          |          |      |
| Rumen | straw | Negative | S phase                                  | 7.81E-06 | 110  |
|       | Rice  |          |                                          |          |      |
| Rumen | straw | Negative | cell death of cardiomyocytes             | 7.90E-06 | 92   |
|       | Rice  |          |                                          |          |      |
| Rumen | straw | Negative | quantity of epithelial tissue            | 7.90E-06 | 78   |
|       | Rice  |          |                                          |          |      |
| Rumen | straw | Negative | transport of amino acids                 | 8.01E-06 | 61   |
|       | Rice  |          |                                          |          |      |
| Rumen | straw | Negative | morphology of lymphatic system component | 8.32E-06 | 169  |
|       | Rice  |          |                                          |          |      |
| Rumen | straw | Negative | abnormal morphology of genital organ     | 8.36E-06 | 166  |
|       | Rice  |          |                                          |          |      |
| Rumen | straw | Negative | apoptosis of heart                       | 8.50E-06 | 83   |
|       | Rice  |          |                                          |          |      |
| Rumen | straw | Negative | generation of blood cells                | 8.71E-06 | 73   |
|       | Rice  |          |                                          |          |      |
| Rumen | straw | Negative | morphology of muscle cells               | 8.71E-06 | 73   |
|       | Rice  |          |                                          |          |      |
| Rumen | straw | Negative | organization of actin cytoskeleton       | 9.21E-06 | 125  |
|       | Rice  |          |                                          |          |      |
| Rumen | straw | Negative | cell death of heart                      | 9.33E-06 | 97   |
| Rumen | Rice  | Negative | apoptosis of connective tissue cells     | 9.34E-06 | 123  |

|       |       |          |                                                |          |     |
|-------|-------|----------|------------------------------------------------|----------|-----|
|       | straw |          |                                                |          |     |
|       | Rice  |          |                                                |          |     |
| Rumen | straw | Negative | death of perinatal stage organism              | 9.69E-06 | 40  |
|       | Rice  |          |                                                |          |     |
| Rumen | straw | Negative | morphology of muscle                           | 9.69E-06 | 138 |
|       | Rice  |          |                                                |          |     |
| Rumen | straw | Negative | orientation of cells                           | 9.71E-06 | 78  |
|       | Rice  |          |                                                |          |     |
| Rumen | straw | Negative | long-term potentiation                         | 9.71E-06 | 103 |
|       | Rice  |          |                                                |          |     |
| Rumen | straw | Negative | cancer of secretory structure                  | 9.77E-06 | 727 |
|       | Rice  |          |                                                |          |     |
| Rumen | straw | Negative | prostatic intraepithelial neoplasia            | 9.77E-06 | 55  |
|       | Rice  |          |                                                |          |     |
| Rumen | straw | Negative | cell death of fibroblasts                      | 9.78E-06 | 111 |
|       | Rice  |          |                                                |          |     |
| Rumen | straw | Negative | development of sensory organ                   | 9.81E-06 | 224 |
|       | Rice  |          |                                                |          |     |
| Rumen | straw | Negative | quantity of hematopoietic progenitor cells     | 9.95E-06 | 178 |
|       | Rice  |          |                                                |          |     |
| Rumen | straw | Negative | ion homeostasis of cells                       | 1.02E-05 | 221 |
|       | Rice  |          | intermediate disease stage peripheral arterial |          |     |
| Rumen | straw | Negative | disease                                        | 1.02E-05 | 70  |
|       | Rice  |          | metabolism of nucleic acid component or        |          |     |
| Rumen | straw | Negative | derivative                                     | 1.02E-05 | 207 |
|       | Rice  |          |                                                |          |     |
| Rumen | straw | Negative | learning                                       | 1.03E-05 | 169 |
|       | Rice  |          |                                                |          |     |
| Rumen | straw | Negative | development of gastrointestinal tract          | 1.05E-05 | 110 |
|       | Rice  |          |                                                |          |     |
| Rumen | straw | Negative | sprouting                                      | 1.06E-05 | 157 |
|       | Rice  |          |                                                |          |     |
| Rumen | straw | Negative | secretory pathway                              | 1.07E-05 | 85  |
|       | Rice  |          |                                                |          |     |
| Rumen | straw | Negative | apoptosis of heart cells                       | 1.09E-05 | 82  |
|       | Rice  |          |                                                |          |     |
| Rumen | straw | Negative | Edema                                          | 1.11E-05 | 141 |
|       | Rice  |          |                                                |          |     |
| Rumen | straw | Negative | midline defect                                 | 1.14E-05 | 111 |
|       | Rice  |          |                                                |          |     |
| Rumen | straw | Negative | epilepsy                                       | 1.18E-05 | 127 |
|       | Rice  |          |                                                |          |     |
| Rumen | straw | Negative | hypersensitive reaction                        | 1.19E-05 | 173 |
| Rumen | Rice  | Negative | advanced stage peripheral arterial disease     | 1.21E-05 | 67  |



|       |       |          |                                               |          |      |
|-------|-------|----------|-----------------------------------------------|----------|------|
|       | straw |          |                                               |          |      |
|       | Rice  |          |                                               |          |      |
| Rumen | straw | Negative | gastrointestinal carcinoma                    | 1.21E-05 | 1615 |
|       | Rice  |          |                                               |          |      |
| Rumen | straw | Negative | transport of L-amino acid                     | 1.22E-05 | 33   |
|       | Rice  |          |                                               |          |      |
| Rumen | straw | Negative | metabolism of monosaccharide                  | 1.22E-05 | 56   |
|       | Rice  |          |                                               |          |      |
| Rumen | straw | Negative | G2 phase                                      | 1.22E-05 | 112  |
|       | Rice  |          |                                               |          |      |
| Rumen | straw | Negative | morphology of heart ventricle                 | 1.22E-05 | 83   |
|       | Rice  |          |                                               |          |      |
| Rumen | straw | Negative | apoptosis of cardiomyocytes                   | 1.23E-05 | 80   |
|       | Rice  |          |                                               |          |      |
| Rumen | straw | Negative | formation of lymphatic system component       | 1.23E-05 | 121  |
|       | Rice  |          |                                               |          |      |
| Rumen | straw | Negative | organization of filaments                     | 1.23E-05 | 88   |
|       | Rice  |          |                                               |          |      |
| Rumen | straw | Negative | generation of T lymphocytes                   | 1.33E-05 | 53   |
|       | Rice  |          |                                               |          |      |
| Rumen | straw | Negative | release of L-amino acid                       | 1.34E-05 | 40   |
|       | Rice  |          | abnormal morphology of central nervous system |          |      |
| Rumen | straw | Negative |                                               | 1.36E-05 | 193  |
|       | Rice  |          |                                               |          |      |
| Rumen | straw | Negative | cell movement of mononuclear leukocytes       | 1.36E-05 | 185  |
|       | Rice  |          |                                               |          |      |
| Rumen | straw | Negative | metabolism of reactive oxygen species         | 1.42E-05 | 199  |
|       | Rice  |          |                                               |          |      |
| Rumen | straw | Negative | endothelial cell development                  | 1.46E-05 | 144  |
|       | Rice  |          |                                               |          |      |
| Rumen | straw | Negative | fusion of cellular membrane                   | 1.46E-05 | 31   |
|       | Rice  |          |                                               |          |      |
| Rumen | straw | Negative | abnormal morphology of skull                  | 1.46E-05 | 93   |
|       | Rice  |          |                                               |          |      |
| Rumen | straw | Negative | infection by RNA virus                        | 1.47E-05 | 334  |
|       | Rice  |          |                                               |          |      |
| Rumen | straw | Negative | generation of leukocytes                      | 1.47E-05 | 71   |
|       | Rice  |          |                                               |          |      |
| Rumen | straw | Negative | morphology of blood vessel                    | 1.47E-05 | 117  |
|       | Rice  |          |                                               |          |      |
| Rumen | straw | Negative | synthesis of terpenoid                        | 1.47E-05 | 117  |
|       | Rice  |          |                                               |          |      |
| Rumen | straw | Negative | morphology of skull                           | 1.48E-05 | 95   |
| Rumen | Rice  | Negative | outgrowth of neurites                         | 1.48E-05 | 163  |

|       |       |          |                                          |          |     |
|-------|-------|----------|------------------------------------------|----------|-----|
|       | straw |          |                                          |          |     |
|       | Rice  |          |                                          |          |     |
| Rumen | straw | Negative | apoptosis of muscle                      | 1.53E-05 | 109 |
|       | Rice  |          |                                          |          |     |
| Rumen | straw | Negative | outgrowth of plasma membrane projections | 1.53E-05 | 164 |
|       | Rice  |          |                                          |          |     |
| Rumen | straw | Negative | uptake of carbohydrate                   | 1.54E-05 | 120 |
|       | Rice  |          |                                          |          |     |
| Rumen | straw | Negative | development of neurons                   | 1.57E-05 | 303 |
|       | Rice  |          |                                          |          |     |
| Rumen | straw | Negative | formation of lymphoid organ              | 1.66E-05 | 110 |
|       | Rice  |          |                                          |          |     |
| Rumen | straw | Negative | apoptosis of kidney cell lines           | 1.66E-05 | 100 |
|       | Rice  |          |                                          |          |     |
| Rumen | straw | Negative | abnormal morphology of skin              | 1.66E-05 | 102 |
|       | Rice  |          |                                          |          |     |
| Rumen | straw | Negative | cellular degradation                     | 1.66E-05 | 106 |
|       | Rice  |          |                                          |          |     |
| Rumen | straw | Negative | morphology of pulmonary alveolus         | 1.66E-05 | 54  |
|       | Rice  |          |                                          |          |     |
| Rumen | straw | Negative | transmembrane potential of mitochondria  | 1.68E-05 | 91  |
|       | Rice  |          |                                          |          |     |
| Rumen | straw | Negative | migration of endothelial cells           | 1.69E-05 | 134 |
|       | Rice  |          |                                          |          |     |
| Rumen | straw | Negative | homeostasis of leukocytes                | 1.73E-05 | 219 |
|       | Rice  |          |                                          |          |     |
| Rumen | straw | Negative | degeneration of cells                    | 1.75E-05 | 140 |
|       | Rice  |          |                                          |          |     |
| Rumen | straw | Negative | interphase of cervical cancer cell lines | 1.88E-05 | 40  |
|       | Rice  |          |                                          |          |     |
| Rumen | straw | Negative | modification of peptide                  | 1.91E-05 | 49  |
|       | Rice  |          |                                          |          |     |
| Rumen | straw | Negative | incidence of tumor                       | 1.91E-05 | 131 |
|       | Rice  |          |                                          |          |     |
| Rumen | straw | Negative | abnormal morphology of brain             | 1.91E-05 | 178 |
|       | Rice  |          |                                          |          |     |
| Rumen | straw | Negative | abnormal morphology of body wall         | 1.93E-05 | 48  |
|       | Rice  |          |                                          |          |     |
| Rumen | straw | Negative | apoptosis of muscle cells                | 1.93E-05 | 108 |
|       | Rice  |          |                                          |          |     |
| Rumen | straw | Negative | development of endothelial tissue        | 1.93E-05 | 148 |
|       | Rice  |          |                                          |          |     |
| Rumen | straw | Negative | cell death of bone cancer cell lines     | 1.95E-05 | 76  |
| Rumen | Rice  | Negative | inflammatory response                    | 1.96E-05 | 301 |

|       |       |          |                                        |          |     |
|-------|-------|----------|----------------------------------------|----------|-----|
|       | straw |          |                                        |          |     |
|       | Rice  |          |                                        |          |     |
| Rumen | straw | Negative | quantity of adipose tissue             | 1.99E-05 | 115 |
|       | Rice  |          |                                        |          |     |
| Rumen | straw | Negative | development of leukocytes              | 2.12E-05 | 231 |
|       | Rice  |          |                                        |          |     |
| Rumen | straw | Negative | metabolism of DNA                      | 2.14E-05 | 160 |
|       | Rice  |          |                                        |          |     |
| Rumen | straw | Negative | infection by Retroviridae              | 2.15E-05 | 279 |
|       | Rice  |          |                                        |          |     |
| Rumen | straw | Negative | oxidation of lipid                     | 2.16E-05 | 90  |
|       | Rice  |          |                                        |          |     |
| Rumen | straw | Negative | formation of skin                      | 2.19E-05 | 148 |
|       | Rice  |          |                                        |          |     |
| Rumen | straw | Negative | female genital tract serous cancer     | 2.26E-05 | 155 |
|       | Rice  |          |                                        |          |     |
| Rumen | straw | Negative | branching of cells                     | 2.29E-05 | 149 |
|       | Rice  |          |                                        |          |     |
| Rumen | straw | Negative | chemotaxis of cells                    | 2.31E-05 | 208 |
|       | Rice  |          |                                        |          |     |
| Rumen | straw | Negative | concentration of sterol                | 2.39E-05 | 125 |
|       | Rice  |          |                                        |          |     |
| Rumen | straw | Negative | release of L-glutamic acid             | 2.50E-05 | 38  |
|       | Rice  |          |                                        |          |     |
| Rumen | straw | Negative | cell death of hematopoietic cells      | 2.50E-05 | 99  |
|       | Rice  |          |                                        |          |     |
| Rumen | straw | Negative | differentiation of epithelial tissue   | 2.50E-05 | 145 |
|       | Rice  |          |                                        |          |     |
| Rumen | straw | Negative | polarization of cells                  | 2.58E-05 | 75  |
|       | Rice  |          |                                        |          |     |
| Rumen | straw | Negative | relaxation of muscle                   | 2.64E-05 | 40  |
|       | Rice  |          |                                        |          |     |
| Rumen | straw | Negative | morphology of lung                     | 2.67E-05 | 80  |
|       | Rice  |          |                                        |          |     |
| Rumen | straw | Negative | adhesion of endothelial cell lines     | 2.70E-05 | 22  |
|       | Rice  |          |                                        |          |     |
| Rumen | straw | Negative | colony formation                       | 2.71E-05 | 211 |
|       | Rice  |          |                                        |          |     |
| Rumen | straw | Negative | oxidation of fatty acid                | 2.76E-05 | 74  |
|       | Rice  |          |                                        |          |     |
| Rumen | straw | Negative | cell death of neuroblastoma cell lines | 2.77E-05 | 82  |
|       | Rice  |          |                                        |          |     |
| Rumen | straw | Negative | plasticity of synapse                  | 2.82E-05 | 54  |
| Rumen | Rice  | Negative | Lymphocyte homeostasis                 | 2.86E-05 | 214 |

|       |       |          |                                               |          |     |
|-------|-------|----------|-----------------------------------------------|----------|-----|
|       | straw |          |                                               |          |     |
|       | Rice  |          |                                               |          |     |
| Rumen | straw | Negative | proliferation of vascular smooth muscle cells | 2.88E-05 | 67  |
|       | Rice  |          |                                               |          |     |
| Rumen | straw | Negative | size of lesion                                | 2.89E-05 | 105 |
|       | Rice  |          |                                               |          |     |
| Rumen | straw | Negative | quantity of thymus gland                      | 2.92E-05 | 97  |
|       | Rice  |          |                                               |          |     |
| Rumen | straw | Negative | development of connective tissue              | 2.92E-05 | 149 |
|       | Rice  |          |                                               |          |     |
| Rumen | straw | Negative | cell death of brain                           | 2.97E-05 | 119 |
|       | Rice  |          |                                               |          |     |
| Rumen | straw | Negative | cell movement of myeloid cells                | 3.04E-05 | 212 |
|       | Rice  |          |                                               |          |     |
| Rumen | straw | Negative | abnormal morphology of internal genitalia     | 3.07E-05 | 141 |
|       | Rice  |          |                                               |          |     |
| Rumen | straw | Negative | generation of lymphocytes                     | 3.09E-05 | 62  |
|       | Rice  |          |                                               |          |     |
| Rumen | straw | Negative | colony formation of cells                     | 3.18E-05 | 194 |
|       | Rice  |          |                                               |          |     |
| Rumen | straw | Negative | transport of carbohydrate                     | 3.35E-05 | 82  |
|       | Rice  |          |                                               |          |     |
| Rumen | straw | Negative | cell death of leukemia cell lines             | 3.40E-05 | 129 |
|       | Rice  |          |                                               |          |     |
| Rumen | straw | Negative | morphology of endothelial cells               | 3.43E-05 | 31  |
|       | Rice  |          |                                               |          |     |
| Rumen | straw | Negative | HIV infection                                 | 3.46E-05 | 275 |
|       | Rice  |          |                                               |          |     |
| Rumen | straw | Negative | congenital malformation of skeleton           | 3.51E-05 | 168 |
|       | Rice  |          |                                               |          |     |
| Rumen | straw | Negative | MAPKKK cascade                                | 3.54E-05 | 86  |
|       | Rice  |          |                                               |          |     |
| Rumen | straw | Negative | accumulation of steroid                       | 3.62E-05 | 39  |
|       | Rice  |          |                                               |          |     |
| Rumen | straw | Negative | quantity of antigen presenting cells          | 3.70E-05 | 113 |
|       | Rice  |          |                                               |          |     |
| Rumen | straw | Negative | synthesis of nitric oxide                     | 3.70E-05 | 113 |
|       | Rice  |          |                                               |          |     |
| Rumen | straw | Negative | cell viability of cervical cancer cell lines  | 3.70E-05 | 92  |
|       | Rice  |          |                                               |          |     |
| Rumen | straw | Negative | degeneration of central nervous system        | 3.87E-05 | 58  |
|       | Rice  |          |                                               |          |     |
| Rumen | straw | Negative | mammary tumor                                 | 3.89E-05 | 605 |
| Rumen | Rice  | Negative | uptake of monosaccharide                      | 4.14E-05 | 110 |

|       |       |          |                                              |          |     |
|-------|-------|----------|----------------------------------------------|----------|-----|
|       | straw |          |                                              |          |     |
|       | Rice  |          |                                              |          |     |
| Rumen | straw | Negative | I-kappaB kinase/NF-kappaB cascade            | 4.14E-05 | 74  |
|       | Rice  |          |                                              |          |     |
| Rumen | straw | Negative | chemotaxis                                   | 4.18E-05 | 213 |
|       | Rice  |          |                                              |          |     |
| Rumen | straw | Negative | mass of fat pad                              | 4.29E-05 | 50  |
|       | Rice  |          |                                              |          |     |
| Rumen | straw | Negative | cell movement of lymphocytes                 | 4.46E-05 | 157 |
|       | Rice  |          |                                              |          |     |
| Rumen | straw | Negative | concentration of triacylglycerol             | 4.59E-05 | 124 |
|       | Rice  |          |                                              |          |     |
| Rumen | straw | Negative | morphology of mouth                          | 4.70E-05 | 59  |
|       | Rice  |          |                                              |          |     |
| Rumen | straw | Negative | exocytosis                                   | 4.75E-05 | 80  |
|       | Rice  |          |                                              |          |     |
| Rumen | straw | Negative | transport of ion                             | 4.78E-05 | 198 |
|       | Rice  |          |                                              |          |     |
| Rumen | straw | Negative | cell death of liver cells                    | 4.90E-05 | 82  |
|       | Rice  |          |                                              |          |     |
| Rumen | straw | Negative | hypoplasia of organ                          | 4.95E-05 | 176 |
|       | Rice  |          |                                              |          |     |
| Rumen | straw | Negative | migration of fibroblasts                     | 4.95E-05 | 62  |
|       | Rice  |          |                                              |          |     |
| Rumen | straw | Negative | formation of vesicles                        | 4.96E-05 | 53  |
|       | Rice  |          |                                              |          |     |
| Rumen | straw | Negative | release of amino acids                       | 5.01E-05 | 44  |
|       | Rice  |          |                                              |          |     |
| Rumen | straw | Negative | metabolism of nucleotide                     | 5.08E-05 | 173 |
|       | Rice  |          |                                              |          |     |
| Rumen | straw | Negative | cell death of hematopoietic progenitor cells | 5.27E-05 | 94  |
|       | Rice  |          |                                              |          |     |
| Rumen | straw | Negative | metabolism of sphingolipid                   | 5.63E-05 | 60  |
|       | Rice  |          |                                              |          |     |
| Rumen | straw | Negative | concentration of acylglycerol                | 5.69E-05 | 134 |
|       | Rice  |          |                                              |          |     |
| Rumen | straw | Negative | infection by HIV-1                           | 5.83E-05 | 236 |
|       | Rice  |          |                                              |          |     |
| Rumen | straw | Negative | cell death of central nervous system cells   | 5.83E-05 | 118 |
|       | Rice  |          |                                              |          |     |
| Rumen | straw | Negative | transport of glutamine family amino acid     | 5.92E-05 | 28  |
|       | Rice  |          |                                              |          |     |
| Rumen | straw | Negative | accumulation of fatty acid                   | 5.94E-05 | 25  |
| Rumen | Rice  | Negative | vascularization of body region               | 5.94E-05 | 59  |

|       |       |          |                                           |          |      |
|-------|-------|----------|-------------------------------------------|----------|------|
|       | straw |          |                                           |          |      |
|       | Rice  |          |                                           |          |      |
| Rumen | straw | Negative | neural tube defect                        | 5.94E-05 | 66   |
|       | Rice  |          |                                           |          |      |
| Rumen | straw | Negative | arteriosclerosis                          | 5.97E-05 | 184  |
|       | Rice  |          |                                           |          |      |
| Rumen | straw | Negative | apoptosis of neuroblastoma cell lines     | 6.11E-05 | 54   |
|       | Rice  |          |                                           |          |      |
| Rumen | straw | Negative | degeneration of neurons                   | 6.14E-05 | 98   |
|       | Rice  |          |                                           |          |      |
| Rumen | straw | Negative | cell viability of connective tissue cells | 6.28E-05 | 58   |
|       | Rice  |          |                                           |          |      |
| Rumen | straw | Negative | proliferation of endothelial cells        | 6.32E-05 | 125  |
|       | Rice  |          |                                           |          |      |
| Rumen | straw | Negative | metabolism of glycolipid                  | 6.33E-05 | 65   |
|       | Rice  |          |                                           |          |      |
| Rumen | straw | Negative | development of lymphocytes                | 6.33E-05 | 215  |
|       | Rice  |          |                                           |          |      |
| Rumen | straw | Negative | autophosphorylation of protein            | 6.33E-05 | 68   |
|       | Rice  |          |                                           |          |      |
| Rumen | straw | Negative | morphology of gonad                       | 6.33E-05 | 150  |
|       | Rice  |          |                                           |          |      |
| Rumen | straw | Negative | cytopenia                                 | 6.38E-05 | 120  |
|       | Rice  |          |                                           |          |      |
| Rumen | straw | Negative | quantity of protein in blood              | 6.38E-05 | 198  |
|       | Rice  |          |                                           |          |      |
| Rumen | straw | Negative | function of phagocytes                    | 6.49E-05 | 123  |
|       | Rice  |          |                                           |          |      |
| Rumen | straw | Negative | uterine serous papillary cancer           | 6.66E-05 | 95   |
|       | Rice  |          |                                           |          |      |
| Rumen | straw | Negative | quantity of phagocytes                    | 6.68E-05 | 167  |
|       | Rice  |          |                                           |          |      |
| Rumen | straw | Negative | high bone mass disease                    | 6.71E-05 | 36   |
|       | Rice  |          |                                           |          |      |
| Rumen | straw | Negative | T cell development                        | 6.79E-05 | 196  |
|       | Rice  |          |                                           |          |      |
| Rumen | straw | Negative | abdominal adenocarcinoma                  | 6.80E-05 | 2075 |
|       | Rice  |          |                                           |          |      |
| Rumen | straw | Negative | cell viability of fibroblast cell lines   | 6.93E-05 | 51   |
|       | Rice  |          |                                           |          |      |
| Rumen | straw | Negative | activation of leukocytes                  | 6.94E-05 | 268  |
|       | Rice  |          |                                           |          |      |
| Rumen | straw | Negative | concentration of cholesterol              | 7.17E-05 | 117  |
| Rumen | Rice  | Negative | formation of thymus gland                 | 7.19E-05 | 69   |

|       |       |          |                                         |          |     |
|-------|-------|----------|-----------------------------------------|----------|-----|
|       | straw |          |                                         |          |     |
|       | Rice  |          |                                         |          |     |
| Rumen | straw | Negative | cell death of cerebral cortex cells     | 7.19E-05 | 94  |
|       | Rice  |          |                                         |          |     |
| Rumen | straw | Negative | cell death of tumor                     | 7.31E-05 | 151 |
|       | Rice  |          |                                         |          |     |
| Rumen | straw | Negative | morphogenesis of neurons                | 7.43E-05 | 167 |
|       | Rice  |          |                                         |          |     |
| Rumen | straw | Negative | atherosclerosis                         | 7.54E-05 | 181 |
|       | Rice  |          |                                         |          |     |
| Rumen | straw | Negative | production of reactive oxygen species   | 7.56E-05 | 145 |
|       | Rice  |          |                                         |          |     |
| Rumen | straw | Negative | apoptosis of embryonic cell lines       | 7.64E-05 | 76  |
|       | Rice  |          |                                         |          |     |
| Rumen | straw | Negative | development of mononuclear leukocytes   | 7.66E-05 | 216 |
|       | Rice  |          |                                         |          |     |
| Rumen | straw | Negative | vaso-occlusion                          | 7.68E-05 | 187 |
|       | Rice  |          |                                         |          |     |
| Rumen | straw | Negative | morphology of epithelial cells          | 7.78E-05 | 93  |
|       | Rice  |          |                                         |          |     |
| Rumen | straw | Negative | apoptosis of hematopoietic cells        | 7.78E-05 | 89  |
|       | Rice  |          |                                         |          |     |
| Rumen | straw | Negative | outgrowth of cells                      | 7.98E-05 | 170 |
|       | Rice  |          |                                         |          |     |
| Rumen | straw | Negative | cell movement of kidney cell lines      | 8.07E-05 | 61  |
|       | Rice  |          |                                         |          |     |
| Rumen | straw | Negative | formation of muscle cells               | 8.23E-05 | 75  |
|       | Rice  |          |                                         |          |     |
| Rumen | straw | Negative | arrest in proliferation of cells        | 8.49E-05 | 88  |
|       | Rice  |          |                                         |          |     |
| Rumen | straw | Negative | quantity of steroid                     | 8.52E-05 | 182 |
|       | Rice  |          |                                         |          |     |
| Rumen | straw | Negative | accumulation of sterol                  | 8.58E-05 | 33  |
|       | Rice  |          |                                         |          |     |
| Rumen | straw | Negative | intraepithelial neoplasia               | 8.58E-05 | 60  |
|       | Rice  |          |                                         |          |     |
| Rumen | straw | Negative | quantity of interleukin                 | 8.58E-05 | 60  |
|       | Rice  |          |                                         |          |     |
| Rumen | straw | Negative | proliferation of lymphatic system cells | 9.05E-05 | 83  |
|       | Rice  |          |                                         |          |     |
| Rumen | straw | Negative | occlusion of artery                     | 9.05E-05 | 185 |
|       | Rice  |          |                                         |          |     |
| Rumen | straw | Negative | abnormal morphology of lung             | 9.19E-05 | 76  |
| Rumen | Rice  | Negative | proliferation of mesenchymal cells      | 9.22E-05 | 42  |

|       |       |          |                                   |          |      |
|-------|-------|----------|-----------------------------------|----------|------|
|       | straw |          |                                   |          |      |
|       | Rice  |          |                                   |          |      |
| Rumen | straw | Negative | abnormal morphology of gonad      | 9.22E-05 | 144  |
|       | Rice  |          |                                   |          |      |
| Rumen | straw | Negative | allergy                           | 9.24E-05 | 159  |
|       | Rice  |          |                                   |          |      |
| Rumen | straw | Negative | recruitment of cells              | 9.32E-05 | 141  |
|       | Rice  |          |                                   |          |      |
| Rumen | straw | Negative | size of embryo                    | 9.32E-05 | 141  |
|       | Rice  |          |                                   |          |      |
| Rumen | straw | Negative | progression of tumor              | 9.33E-05 | 68   |
|       | Rice  |          |                                   |          |      |
| Rumen | straw | Negative | serine phosphorylation of peptide | 9.46E-05 | 39   |
|       | Rice  |          |                                   |          |      |
| Rumen | straw | Negative | colon cancer                      | 9.52E-05 | 1316 |
|       | Rice  |          |                                   |          |      |
| Rumen | straw | Negative | influx of cation                  | 9.54E-05 | 80   |
|       | Rice  |          |                                   |          |      |
| Rumen | straw | Negative | T cell homeostasis                | 9.59E-05 | 200  |
|       | Rice  |          |                                   |          |      |
| Rumen | straw | Negative | neovascularization of organ       | 9.59E-05 | 49   |
|       | Rice  |          |                                   |          |      |
| Rumen | straw | Negative | G1 phase                          | 9.64E-05 | 153  |
|       | Rice  |          |                                   |          |      |
| Rumen | straw | Negative | quantity of thymocytes            | 9.72E-05 | 94   |
|       | Rice  |          |                                   |          |      |
| Rumen | straw | Negative | morphology of lymphoid organ      | 9.91E-05 | 154  |
|       | Rice  |          |                                   |          |      |
| Rumen | straw | Negative | transport of cation               | 9.91E-05 | 158  |
|       | Rice  |          |                                   |          |      |
| Rumen | straw | Negative | apoptosis of liver                | 9.91E-05 | 67   |
|       | Rice  |          |                                   |          |      |
| Rumen | straw | Negative | transport of monosaccharide       | 9.91E-05 | 67   |
|       | Rice  |          |                                   |          |      |
| Rumen | straw | Negative | occlusion of blood vessel         | 1.02E-04 | 187  |
|       | Rice  |          |                                   |          |      |
| Rumen | straw | Negative | size of cells                     | 1.03E-04 | 168  |
|       | Rice  |          |                                   |          |      |
| Rumen | straw | Negative | flux of ion                       | 1.03E-04 | 128  |
|       | Rice  |          |                                   |          |      |
| Rumen | straw | Negative | colon tumor                       | 1.04E-04 | 1323 |
|       | Rice  |          |                                   |          |      |
| Rumen | straw | Negative | apoptosis of leukocytes           | 1.04E-04 | 178  |
| Rumen | Rice  | Negative | neoplasia of colon                | 1.05E-04 | 1319 |



|       |        |          |                                       |          |      |  |
|-------|--------|----------|---------------------------------------|----------|------|--|
|       | straw  |          |                                       |          |      |  |
|       | Rice   |          |                                       |          |      |  |
| Rumen | straw  | Negative | proliferation of bone marrow cells    | 1.06E-04 | 52   |  |
|       | Rice   |          |                                       |          |      |  |
| Rumen | straw  | Negative | long-term potentiation of synapse     | 1.06E-04 | 63   |  |
|       | Rice   |          |                                       |          |      |  |
| Rumen | straw  | Negative | migration of smooth muscle cells      | 1.06E-04 | 63   |  |
|       | Rice   |          |                                       |          |      |  |
| Rumen | straw  | Negative | transport of metal                    | 1.06E-04 | 132  |  |
|       | Rice   |          |                                       |          |      |  |
| Rumen | straw  | Negative | modification of palmitic acid         | 1.07E-04 | 26   |  |
|       | Rice   |          |                                       |          |      |  |
| Rumen | straw  | Negative | accumulation of cells                 | 1.08E-04 | 139  |  |
|       | Rice   |          |                                       |          |      |  |
| Rumen | straw  | Negative | activation of blood cells             | 1.09E-04 | 284  |  |
|       | Rice   |          |                                       |          |      |  |
| Rumen | straw  | Negative | colorectal neoplasia                  | 1.09E-04 | 1537 |  |
|       | Rice   |          |                                       |          |      |  |
| Rumen | straw  | Negative | serous neoplasm                       | 1.09E-04 | 234  |  |
|       | Rice   |          |                                       |          |      |  |
| Rumen | straw  | Negative | quantity of muscle cells              | 1.10E-04 | 51   |  |
|       | Rice   |          |                                       |          |      |  |
| Rumen | straw  | Negative | abnormal morphology of axial skeleton | 1.11E-04 | 80   |  |
|       | Rice   |          |                                       |          |      |  |
| Rumen | straw  | Negative | quantity of metal                     | 1.12E-04 | 193  |  |
|       | Corn   |          |                                       |          |      |  |
| Rumen | stover | Positive | proliferation of cells                | 6.36E-51 | 1545 |  |
|       | Corn   |          |                                       |          |      |  |
| Rumen | stover | Positive | morbidity or mortality                | 2.78E-41 | 1057 |  |
|       | Corn   |          |                                       |          |      |  |
| Rumen | stover | Positive | organismal death                      | 3.69E-41 | 1044 |  |
|       | Corn   |          |                                       |          |      |  |
| Rumen | stover | Positive | cancer                                | 1.75E-38 | 3805 |  |
|       | Corn   |          |                                       |          |      |  |
| Rumen | stover | Positive | cell death                            | 6.71E-38 | 1364 |  |
|       | Corn   |          |                                       |          |      |  |
| Rumen | stover | Positive | malignant solid tumor                 | 3.33E-37 | 3759 |  |
|       | Corn   |          |                                       |          |      |  |
| Rumen | stover | Positive | necrosis                              | 5.93E-33 | 1073 |  |
|       | Corn   |          |                                       |          |      |  |
| Rumen | stover | Positive | organization of cytoplasm             | 2.20E-32 | 692  |  |
|       | Corn   |          |                                       |          |      |  |
| Rumen | stover | Positive | apoptosis                             | 2.39E-32 | 1095 |  |
| Rumen | Corn   | Positive | cell movement                         | 1.77E-29 | 899  |  |

|       |        |          |                                |          |      |
|-------|--------|----------|--------------------------------|----------|------|
|       | stover |          |                                |          |      |
|       | Corn   |          |                                |          |      |
| Rumen | stover | Positive | organization of cytoskeleton   | 2.34E-29 | 629  |
|       | Corn   |          |                                |          |      |
| Rumen | stover | Positive | morphology of cells            | 1.05E-26 | 821  |
|       | Corn   |          |                                |          |      |
| Rumen | stover | Positive | tumorigenesis of tissue        | 8.05E-25 | 3169 |
|       | Corn   |          |                                |          |      |
| Rumen | stover | Positive | neoplasia of epithelial tissue | 7.91E-24 | 3116 |
|       | Corn   |          |                                |          |      |
| Rumen | stover | Positive | migration of cells             | 2.09E-23 | 791  |
|       | Corn   |          |                                |          |      |
| Rumen | stover | Positive | epithelial cancer              | 2.36E-23 | 3086 |
|       | Corn   |          |                                |          |      |
| Rumen | stover | Positive | abdominal neoplasm             | 3.68E-22 | 3084 |
|       | Corn   |          |                                |          |      |
| Rumen | stover | Positive | expression of RNA              | 8.02E-22 | 870  |
|       | Corn   |          |                                |          |      |
| Rumen | stover | Positive | microtubule dynamics           | 2.47E-21 | 519  |
|       | Corn   |          |                                |          |      |
| Rumen | stover | Positive | digestive organ tumor          | 1.79E-20 | 2683 |
|       | Corn   |          |                                |          |      |
| Rumen | stover | Positive | abdominal cancer               | 1.80E-20 | 3040 |
|       | Corn   |          |                                |          |      |
| Rumen | stover | Positive | quantity of cells              | 2.25E-20 | 728  |
|       | Corn   |          |                                |          |      |
| Rumen | stover | Positive | digestive system cancer        | 2.25E-20 | 2659 |
|       | Corn   |          |                                |          |      |
| Rumen | stover | Positive | cellular homeostasis           | 6.13E-20 | 637  |
|       | Corn   |          |                                |          |      |
| Rumen | stover | Positive | transcription                  | 1.80E-19 | 804  |
|       | Corn   |          |                                |          |      |
| Rumen | stover | Positive | cell death of tumor cell lines | 5.72E-19 | 634  |
|       | Corn   |          |                                |          |      |
| Rumen | stover | Positive | transcription of RNA           | 3.15E-18 | 749  |
|       | Corn   |          |                                |          |      |
| Rumen | stover | Positive | transport of molecule          | 1.59E-17 | 658  |
|       | Corn   |          |                                |          |      |
| Rumen | stover | Positive | differentiation of cells       | 6.10E-17 | 880  |
|       | Corn   |          |                                |          |      |
| Rumen | stover | Positive | cell survival                  | 7.37E-17 | 576  |
|       | Corn   |          |                                |          |      |
| Rumen | stover | Positive | quantity of blood cells        | 8.83E-17 | 442  |
| Rumen | Corn   | Positive | cell viability                 | 8.83E-17 | 542  |

|       |        |          |                                        |          |     |
|-------|--------|----------|----------------------------------------|----------|-----|
|       | stover |          |                                        |          |     |
|       | Corn   |          |                                        |          |     |
| Rumen | stover | Positive | quantity of leukocytes                 | 1.67E-16 | 399 |
|       | Corn   |          |                                        |          |     |
| Rumen | stover | Positive | Viral Infection                        | 2.46E-16 | 652 |
|       | Corn   |          |                                        |          |     |
| Rumen | stover | Positive | apoptosis of tumor cell lines          | 3.03E-16 | 507 |
|       | Corn   |          |                                        |          |     |
| Rumen | stover | Positive | angiogenesis                           | 3.85E-16 | 394 |
|       | Corn   |          |                                        |          |     |
| Rumen | stover | Positive | formation of cellular protrusions      | 4.79E-16 | 392 |
|       | Corn   |          |                                        |          |     |
| Rumen | stover | Positive | cell movement of tumor cell lines      | 6.88E-16 | 372 |
|       | Corn   |          |                                        |          |     |
| Rumen | stover | Positive | vasculogenesis                         | 1.30E-15 | 327 |
|       | Corn   |          |                                        |          |     |
| Rumen | stover | Positive | size of body                           | 1.08E-14 | 367 |
|       | Corn   |          |                                        |          |     |
| Rumen | stover | Positive | morphology of body cavity              | 1.63E-14 | 493 |
|       | Corn   |          |                                        |          |     |
| Rumen | stover | Positive | morphology of cardiovascular system    | 2.40E-14 | 277 |
|       | Corn   |          |                                        |          |     |
| Rumen | stover | Positive | abnormal morphology of cells           | 2.99E-14 | 517 |
|       | Corn   |          |                                        |          |     |
| Rumen | stover | Positive | proliferation of tumor cell lines      | 4.57E-14 | 617 |
|       | Corn   |          |                                        |          |     |
| Rumen | stover | Positive | development of body trunk              | 9.52E-14 | 461 |
|       | Corn   |          |                                        |          |     |
| Rumen | stover | Positive | abnormal morphology of body cavity     | 1.01E-13 | 470 |
|       | Corn   |          |                                        |          |     |
| Rumen | stover | Positive | metabolism of carbohydrate             | 2.22E-13 | 274 |
|       | Corn   |          |                                        |          |     |
| Rumen | stover | Positive | Movement Disorders                     | 1.12E-12 | 435 |
|       | Corn   |          |                                        |          |     |
| Rumen | stover | Positive | abnormal morphology of thoracic cavity | 1.20E-12 | 258 |
|       | Corn   |          |                                        |          |     |
| Rumen | stover | Positive | transcription of DNA                   | 1.58E-12 | 604 |
|       | Corn   |          |                                        |          |     |
| Rumen | stover | Positive | formation of cells                     | 2.11E-12 | 406 |
|       | Corn   |          |                                        |          |     |
| Rumen | stover | Positive | invasion of cells                      | 2.30E-12 | 364 |
|       | Corn   |          |                                        |          |     |
| Rumen | stover | Positive | function of blood cells                | 4.01E-12 | 256 |
| Rumen | Corn   | Positive | protein kinase cascade                 | 5.61E-12 | 191 |

|       |        |          |                                              |          |     |
|-------|--------|----------|----------------------------------------------|----------|-----|
|       | stover |          |                                              |          |     |
|       | Corn   |          |                                              |          |     |
| Rumen | stover | Positive | migration of tumor cell lines                | 6.33E-12 | 301 |
|       | Corn   |          |                                              |          |     |
| Rumen | stover | Positive | homing of cells                              | 6.56E-12 | 244 |
|       | Corn   |          |                                              |          |     |
| Rumen | stover | Positive | function of leukocytes                       | 6.78E-12 | 236 |
|       | Corn   |          |                                              |          |     |
| Rumen | stover | Positive | homing                                       | 7.46E-12 | 250 |
|       | Corn   |          |                                              |          |     |
| Rumen | stover | Positive | development of vasculature                   | 9.79E-12 | 189 |
|       | Corn   |          |                                              |          |     |
| Rumen | stover | Positive | cell movement of blood cells                 | 1.01E-11 | 363 |
|       | Corn   |          |                                              |          |     |
| Rumen | stover | Positive | migration of blood cells                     | 1.11E-11 | 362 |
|       | Corn   |          |                                              |          |     |
| Rumen | stover | Positive | leukocyte migration                          | 1.41E-11 | 361 |
|       | Corn   |          |                                              |          |     |
| Rumen | stover | Positive | cell death of blood cells                    | 1.72E-11 | 294 |
|       | Corn   |          |                                              |          |     |
| Rumen | stover | Positive | concentration of lipid                       | 1.74E-11 | 338 |
|       | Corn   |          |                                              |          |     |
| Rumen | stover | Positive | abnormal morphology of cardiovascular system | 1.79E-11 | 246 |
|       | Corn   |          |                                              |          |     |
| Rumen | stover | Positive | cell movement of leukocytes                  | 2.30E-11 | 321 |
|       | Corn   |          |                                              |          |     |
| Rumen | stover | Positive | quantity of lymphocytes                      | 3.35E-11 | 298 |
|       | Corn   |          |                                              |          |     |
| Rumen | stover | Positive | phosphorylation of protein                   | 4.37E-11 | 308 |
|       | Corn   |          |                                              |          |     |
| Rumen | stover | Positive | cell cycle progression                       | 5.05E-11 | 422 |
|       | Corn   |          |                                              |          |     |
| Rumen | stover | Positive | proliferation of neuronal cells              | 6.69E-11 | 247 |
|       | Corn   |          |                                              |          |     |
| Rumen | stover | Positive | quantity of mononuclear leukocytes           | 7.23E-11 | 307 |
|       | Corn   |          |                                              |          |     |
| Rumen | stover | Positive | organization of organelle                    | 1.19E-10 | 232 |
|       | Corn   |          |                                              |          |     |
| Rumen | stover | Positive | cell viability of tumor cell lines           | 1.30E-10 | 322 |
|       | Corn   |          |                                              |          |     |
| Rumen | stover | Positive | degeneration of nervous system               | 1.55E-10 | 133 |
|       | Corn   |          |                                              |          |     |
| Rumen | stover | Positive | transactivation                              | 1.87E-10 | 246 |
| Rumen | Corn   | Positive | perinatal death                              | 2.01E-10 | 252 |

|       |        |          |                                          |          |     |
|-------|--------|----------|------------------------------------------|----------|-----|
|       | stover |          |                                          |          |     |
|       | Corn   |          |                                          |          |     |
| Rumen | stover | Positive | activation of cells                      | 2.03E-10 | 394 |
|       | Corn   |          |                                          |          |     |
| Rumen | stover | Positive | cell movement of endothelial cells       | 2.06E-10 | 159 |
|       | Corn   |          |                                          |          |     |
| Rumen | stover | Positive | growth of epithelial tissue              | 2.29E-10 | 284 |
|       | Corn   |          |                                          |          |     |
| Rumen | stover | Positive | ubiquitination of protein                | 2.72E-10 | 150 |
|       | Corn   |          |                                          |          |     |
| Rumen | stover | Positive | ubiquitination                           | 2.72E-10 | 152 |
|       | Corn   |          |                                          |          |     |
| Rumen | stover | Positive | Growth Failure                           | 4.76E-10 | 252 |
|       | Corn   |          |                                          |          |     |
| Rumen | stover | Positive | growth of organism                       | 5.65E-10 | 340 |
|       | Corn   |          |                                          |          |     |
| Rumen | stover | Positive | cell movement of myeloid cells           | 7.61E-10 | 229 |
|       | Corn   |          |                                          |          |     |
| Rumen | stover | Positive | cell death of immune cells               | 7.84E-10 | 274 |
|       | Corn   |          |                                          |          |     |
| Rumen | stover | Positive | morphology of nervous system             | 7.84E-10 | 320 |
|       | Corn   |          |                                          |          |     |
| Rumen | stover | Positive | development of cytoplasm                 | 8.35E-10 | 199 |
|       | Corn   |          |                                          |          |     |
| Rumen | stover | Positive | development of lymphatic system          | 9.09E-10 | 158 |
|       | Corn   |          |                                          |          |     |
| Rumen | stover | Positive | proliferation of blood cells             | 9.97E-10 | 341 |
|       | Corn   |          |                                          |          |     |
| Rumen | stover | Positive | interphase                               | 1.09E-09 | 272 |
|       | Corn   |          |                                          |          |     |
| Rumen | stover | Positive | Neurodegeneration                        | 1.22E-09 | 139 |
|       | Corn   |          |                                          |          |     |
| Rumen | stover | Positive | abnormal morphology of embryonic tissue  | 1.23E-09 | 231 |
|       | Corn   |          |                                          |          |     |
| Rumen | stover | Positive | invasion of tumor cell lines             | 1.31E-09 | 275 |
|       | Corn   |          |                                          |          |     |
| Rumen | stover | Positive | development of epithelial tissue         | 1.35E-09 | 219 |
|       | Corn   |          |                                          |          |     |
| Rumen | stover | Positive | cell death of cervical cancer cell lines | 1.44E-09 | 155 |
|       | Corn   |          |                                          |          |     |
| Rumen | stover | Positive | synthesis of lipid                       | 1.44E-09 | 293 |
|       | Corn   |          |                                          |          |     |
| Rumen | stover | Positive | development of blood cells               | 1.47E-09 | 270 |
| Rumen | Corn   | Positive | growth of tumor                          | 1.55E-09 | 323 |

|       |        |          |                                       |          |      |
|-------|--------|----------|---------------------------------------|----------|------|
|       | stover |          |                                       |          |      |
|       | Corn   |          |                                       |          |      |
| Rumen | stover | Positive | morphology of head                    | 1.62E-09 | 352  |
|       | Corn   |          |                                       |          |      |
| Rumen | stover | Positive | abnormal morphology of head           | 1.77E-09 | 336  |
|       | Corn   |          |                                       |          |      |
| Rumen | stover | Positive | chemotaxis                            | 1.92E-09 | 229  |
|       | Corn   |          |                                       |          |      |
| Rumen | stover | Positive | infection of cells                    | 1.92E-09 | 323  |
|       | Corn   |          |                                       |          |      |
| Rumen | stover | Positive | infection by Retroviridae             | 2.04E-09 | 294  |
|       | Corn   |          |                                       |          |      |
| Rumen | stover | Positive | organization of actin cytoskeleton    | 2.04E-09 | 135  |
|       | Corn   |          |                                       |          |      |
| Rumen | stover | Positive | chemotaxis of cells                   | 2.25E-09 | 222  |
|       | Corn   |          |                                       |          |      |
| Rumen | stover | Positive | formation of cytoskeleton             | 2.38E-09 | 164  |
|       | Corn   |          |                                       |          |      |
| Rumen | stover | Positive | development of leukocytes             | 2.39E-09 | 245  |
|       | Corn   |          |                                       |          |      |
| Rumen | stover | Positive | cell movement of phagocytes           | 2.57E-09 | 230  |
|       | Corn   |          |                                       |          |      |
| Rumen | stover | Positive | cell spreading                        | 2.72E-09 | 125  |
|       | Corn   |          |                                       |          |      |
| Rumen | stover | Positive | infection by RNA virus                | 3.23E-09 | 347  |
|       | Corn   |          |                                       |          |      |
| Rumen | stover | Positive | dysmyelination                        | 3.55E-09 | 68   |
|       | Corn   |          |                                       |          |      |
| Rumen | stover | Positive | benign neoplasia                      | 3.56E-09 | 368  |
|       | Corn   |          |                                       |          |      |
| Rumen | stover | Positive | accumulation of cells                 | 3.81E-09 | 154  |
|       | Corn   |          |                                       |          |      |
| Rumen | stover | Positive | hepatobiliary system cancer           | 4.47E-09 | 1541 |
|       | Corn   |          |                                       |          |      |
| Rumen | stover | Positive | development of connective tissue      | 4.57E-09 | 161  |
|       | Corn   |          |                                       |          |      |
| Rumen | stover | Positive | infection by lentivirus               | 5.56E-09 | 290  |
|       | Corn   |          |                                       |          |      |
| Rumen | stover | Positive | HIV infection                         | 6.17E-09 | 289  |
|       | Corn   |          |                                       |          |      |
| Rumen | stover | Positive | growth of plasma membrane projections | 6.18E-09 | 197  |
|       | Corn   |          |                                       |          |      |
| Rumen | stover | Positive | transactivation of RNA                | 6.84E-09 | 226  |
| Rumen | Corn   | Positive | differentiation of leukocytes         | 6.84E-09 | 274  |

|       |        |          |                                           |          |      |
|-------|--------|----------|-------------------------------------------|----------|------|
|       | stover |          |                                           |          |      |
|       | Corn   |          |                                           |          |      |
| Rumen | stover | Positive | liver tumor                               | 7.10E-09 | 1542 |
|       | Corn   |          |                                           |          |      |
| Rumen | stover | Positive | formation of lymphoid organ               | 7.21E-09 | 119  |
|       | Corn   |          |                                           |          |      |
| Rumen | stover | Positive | growth of neurites                        | 7.45E-09 | 195  |
|       | Corn   |          |                                           |          |      |
| Rumen | stover | Positive | outgrowth of plasma membrane projections  | 7.45E-09 | 174  |
|       | Corn   |          |                                           |          |      |
| Rumen | stover | Positive | liver cancer                              | 7.45E-09 | 1532 |
|       | Corn   |          |                                           |          |      |
| Rumen | stover | Positive | hepatocellular carcinoma                  | 7.56E-09 | 1486 |
|       | Corn   |          |                                           |          |      |
| Rumen | stover | Positive | development of neurons                    | 7.91E-09 | 314  |
|       | Corn   |          |                                           |          |      |
| Rumen | stover | Positive | development of abdomen                    | 8.41E-09 | 239  |
|       | Corn   |          |                                           |          |      |
| Rumen | stover | Positive | development of lymphatic system component | 8.69E-09 | 136  |
|       | Corn   |          |                                           |          |      |
| Rumen | stover | Positive | abnormal morphology of abdomen            | 8.81E-09 | 348  |
|       | Corn   |          |                                           |          |      |
| Rumen | stover | Positive | demyelination                             | 9.62E-09 | 61   |
|       | Corn   |          |                                           |          |      |
| Rumen | stover | Positive | development of cardiovascular tissue      | 1.08E-08 | 159  |
|       | Corn   |          |                                           |          |      |
| Rumen | stover | Positive | Organ Degeneration                        | 1.14E-08 | 206  |
|       | Corn   |          |                                           |          |      |
| Rumen | stover | Positive | cell death of connective tissue cells     | 1.14E-08 | 247  |
|       | Corn   |          |                                           |          |      |
| Rumen | stover | Positive | formation of lymphatic system component   | 1.14E-08 | 129  |
|       | Corn   |          |                                           |          |      |
| Rumen | stover | Positive | cell movement of neutrophils              | 1.14E-08 | 131  |
|       | Corn   |          |                                           |          |      |
| Rumen | stover | Positive | abnormal morphology of nervous system     | 1.19E-08 | 292  |
|       | Corn   |          |                                           |          |      |
| Rumen | stover | Positive | outgrowth of neurites                     | 1.22E-08 | 172  |
|       | Corn   |          |                                           |          |      |
| Rumen | stover | Positive | cell movement of granulocytes             | 1.24E-08 | 159  |
|       | Corn   |          |                                           |          |      |
| Rumen | stover | Positive | differentiation of blood cells            | 1.36E-08 | 335  |
|       | Corn   |          |                                           |          |      |
| Rumen | stover | Positive | colony formation of cells                 | 1.43E-08 | 205  |
| Rumen | Corn   | Positive | accumulation of lipid                     | 1.69E-08 | 131  |

|       |        |          |                                          |          |     |
|-------|--------|----------|------------------------------------------|----------|-----|
|       | stover |          |                                          |          |     |
|       | Corn   |          |                                          |          |     |
| Rumen | stover | Positive | autophagy                                | 1.88E-08 | 160 |
|       | Corn   |          |                                          |          |     |
| Rumen | stover | Positive | survival of organism                     | 1.88E-08 | 283 |
|       | Corn   |          |                                          |          |     |
| Rumen | stover | Positive | neuronal cell death                      | 1.89E-08 | 275 |
|       | Corn   |          |                                          |          |     |
| Rumen | stover | Positive | autosomal recessive disease              | 2.00E-08 | 362 |
|       | Corn   |          |                                          |          |     |
| Rumen | stover | Positive | proliferation of connective tissue cells | 2.15E-08 | 242 |
|       | Corn   |          |                                          |          |     |
| Rumen | stover | Positive | accumulation of blood cells              | 2.47E-08 | 123 |
|       | Corn   |          |                                          |          |     |
| Rumen | stover | Positive | concentration of fatty acid              | 2.47E-08 | 123 |
|       | Corn   |          |                                          |          |     |
| Rumen | stover | Positive | development of hematopoietic system      | 2.70E-08 | 111 |
|       | Corn   |          |                                          |          |     |
| Rumen | stover | Positive | cellular degradation                     | 2.78E-08 | 113 |
|       | Corn   |          |                                          |          |     |
| Rumen | stover | Positive | replication of RNA virus                 | 2.88E-08 | 209 |
|       | Corn   |          |                                          |          |     |
| Rumen | stover | Positive | morphology of heart                      | 2.99E-08 | 171 |
|       | Corn   |          |                                          |          |     |
| Rumen | stover | Positive | disorder of basal ganglia                | 3.25E-08 | 305 |
|       | Corn   |          |                                          |          |     |
| Rumen | stover | Positive | fibrogenesis                             | 3.31E-08 | 173 |
|       | Corn   |          |                                          |          |     |
| Rumen | stover | Positive | colony formation                         | 3.49E-08 | 220 |
|       | Corn   |          |                                          |          |     |
| Rumen | stover | Positive | migration of endothelial cells           | 3.95E-08 | 141 |
|       | Corn   |          |                                          |          |     |
| Rumen | stover | Positive | development of lymphocytes               | 4.09E-08 | 226 |
|       | Corn   |          |                                          |          |     |
| Rumen | stover | Positive | necrosis of epithelial tissue            | 4.26E-08 | 239 |
|       | Corn   |          |                                          |          |     |
| Rumen | stover | Positive | apoptosis of blood cells                 | 4.90E-08 | 204 |
|       | Corn   |          |                                          |          |     |
| Rumen | stover | Positive | growth of embryo                         | 5.10E-08 | 197 |
|       | Corn   |          |                                          |          |     |
| Rumen | stover | Positive | development of endothelial tissue        | 5.16E-08 | 155 |
|       | Corn   |          |                                          |          |     |
| Rumen | stover | Positive | proliferation of immune cells            | 5.19E-08 | 313 |
| Rumen | Corn   | Positive | development of mononuclear leukocytes    | 5.38E-08 | 227 |



|       |        |          |                                      |          |     |
|-------|--------|----------|--------------------------------------|----------|-----|
|       | stover |          |                                      |          |     |
|       | Corn   |          |                                      |          |     |
| Rumen | stover | Positive | mitosis                              | 5.53E-08 | 204 |
|       | Corn   |          |                                      |          |     |
| Rumen | stover | Positive | infection by HIV-1                   | 6.20E-08 | 246 |
|       | Corn   |          |                                      |          |     |
| Rumen | stover | Positive | synthesis of carbohydrate            | 6.28E-08 | 177 |
|       | Corn   |          |                                      |          |     |
| Rumen | stover | Positive | cell death of epithelial cells       | 6.31E-08 | 204 |
|       | Corn   |          |                                      |          |     |
| Rumen | stover | Positive | degeneration of neurons              | 6.42E-08 | 106 |
|       | Corn   |          |                                      |          |     |
| Rumen | stover | Positive | T cell development                   | 6.67E-08 | 206 |
|       | Corn   |          |                                      |          |     |
| Rumen | stover | Positive | neuromuscular disease                | 6.84E-08 | 345 |
|       | Corn   |          |                                      |          |     |
| Rumen | stover | Positive | proliferation of hematopoietic cells | 6.86E-08 | 112 |
|       | Corn   |          |                                      |          |     |
| Rumen | stover | Positive | outgrowth of cells                   | 7.00E-08 | 180 |
|       | Corn   |          |                                      |          |     |
| Rumen | stover | Positive | neonatal death                       | 7.63E-08 | 182 |
|       | Corn   |          |                                      |          |     |
| Rumen | stover | Positive | cell movement of fibroblasts         | 7.67E-08 | 84  |
|       | Corn   |          |                                      |          |     |
| Rumen | stover | Positive | degeneration of cells                | 7.68E-08 | 146 |
|       | Corn   |          |                                      |          |     |
| Rumen | stover | Positive | formation of filaments               | 9.20E-08 | 166 |
|       | Corn   |          |                                      |          |     |
| Rumen | stover | Positive | Lymphocyte homeostasis               | 9.88E-08 | 221 |
|       | Corn   |          |                                      |          |     |
| Rumen | stover | Positive | neuritogenesis                       | 1.03E-07 | 235 |
|       | Corn   |          |                                      |          |     |
| Rumen | stover | Positive | metabolism of protein                | 1.05E-07 | 376 |
|       | Corn   |          |                                      |          |     |
| Rumen | stover | Positive | neurological signs                   | 1.06E-07 | 260 |
|       | Corn   |          |                                      |          |     |
| Rumen | stover | Positive | endothelial cell development         | 1.10E-07 | 149 |
|       | Corn   |          |                                      |          |     |
| Rumen | stover | Positive | uptake of carbohydrate               | 1.11E-07 | 125 |
|       | Corn   |          |                                      |          |     |
| Rumen | stover | Positive | dyskinesia                           | 1.25E-07 | 247 |
|       | Corn   |          |                                      |          |     |
| Rumen | stover | Positive | growth of connective tissue          | 1.28E-07 | 257 |
| Rumen | Corn   | Positive | morphology of connective tissue      | 1.30E-07 | 189 |

|       |        |          |                                                 |          |     |
|-------|--------|----------|-------------------------------------------------|----------|-----|
|       | stover |          |                                                 |          |     |
|       | Corn   |          |                                                 |          |     |
| Rumen | stover | Positive | homeostasis of leukocytes                       | 1.33E-07 | 224 |
|       | Corn   |          |                                                 |          |     |
| Rumen | stover | Positive | formation of blood cells                        | 1.40E-07 | 89  |
|       | Corn   |          |                                                 |          |     |
| Rumen | stover | Positive | development of body axis                        | 1.44E-07 | 403 |
|       | Corn   |          |                                                 |          |     |
| Rumen | stover | Positive | replication of virus                            | 1.58E-07 | 226 |
|       | Corn   |          |                                                 |          |     |
| Rumen | stover | Positive | proliferation of lymphatic system cells         | 1.63E-07 | 90  |
|       | Corn   |          |                                                 |          |     |
| Rumen | stover | Positive | T cell homeostasis                              | 1.79E-07 | 209 |
|       | Corn   |          |                                                 |          |     |
| Rumen | stover | Positive | proliferation of hematopoietic progenitor cells | 1.81E-07 | 106 |
|       | Corn   |          |                                                 |          |     |
| Rumen | stover | Positive | formation of thymus gland                       | 1.83E-07 | 75  |
|       | Corn   |          |                                                 |          |     |
| Rumen | stover | Positive | quantity of T lymphocytes                       | 1.84E-07 | 216 |
|       | Corn   |          |                                                 |          |     |
| Rumen | stover | Positive | uptake of monosaccharide                        | 1.84E-07 | 116 |
|       | Corn   |          |                                                 |          |     |
| Rumen | stover | Positive | fatty acid metabolism                           | 1.98E-07 | 240 |
|       | Corn   |          |                                                 |          |     |
| Rumen | stover | Positive | cell movement of connective tissue cells        | 1.98E-07 | 98  |
|       | Corn   |          |                                                 |          |     |
| Rumen | stover | Positive | activation of DNA endogenous promoter           | 2.03E-07 | 457 |
|       | Corn   |          |                                                 |          |     |
| Rumen | stover | Positive | proliferation of mononuclear leukocytes         | 2.07E-07 | 290 |
|       | Corn   |          |                                                 |          |     |
| Rumen | stover | Positive | cell transformation                             | 2.14E-07 | 188 |
|       | Corn   |          |                                                 |          |     |
| Rumen | stover | Positive | chorea                                          | 2.14E-07 | 231 |
|       | Corn   |          |                                                 |          |     |
| Rumen | stover | Positive | abnormal morphology of heart                    | 2.14E-07 | 159 |
|       | Corn   |          |                                                 |          |     |
| Rumen | stover | Positive | I-kappaB kinase/NF-kappaB cascade               | 2.30E-07 | 79  |
|       | Corn   |          |                                                 |          |     |
| Rumen | stover | Positive | morphology of vessel                            | 2.30E-07 | 130 |
|       | Corn   |          |                                                 |          |     |
| Rumen | stover | Positive | vascularization                                 | 2.32E-07 | 103 |
|       | Corn   |          |                                                 |          |     |
| Rumen | stover | Positive | Huntington's Disease                            | 2.34E-07 | 230 |
| Rumen | Corn   | Positive | formation of plasma membrane projections        | 2.36E-07 | 238 |

|       |        |          |                                              |          |     |
|-------|--------|----------|----------------------------------------------|----------|-----|
|       | stover |          |                                              |          |     |
|       | Corn   |          |                                              |          |     |
| Rumen | stover | Positive | binding of DNA                               | 2.58E-07 | 210 |
|       | Corn   |          |                                              |          |     |
| Rumen | stover | Positive | formation of leukocytes                      | 2.63E-07 | 73  |
|       | Corn   |          |                                              |          |     |
| Rumen | stover | Positive | S phase                                      | 3.28E-07 | 112 |
|       | Corn   |          |                                              |          |     |
| Rumen | stover | Positive | female genital tract serous cancer           | 3.40E-07 | 159 |
|       | Corn   |          |                                              |          |     |
| Rumen | stover | Positive | congenital anomaly of musculoskeletal system | 3.40E-07 | 288 |
|       | Corn   |          |                                              |          |     |
| Rumen | stover | Positive | morphology of blood vessel                   | 3.76E-07 | 120 |
|       | Corn   |          |                                              |          |     |
| Rumen | stover | Positive | apoptosis of connective tissue cells         | 3.87E-07 | 125 |
|       | Corn   |          |                                              |          |     |
| Rumen | stover | Positive | apoptosis of pheochromocytoma cell lines     | 4.21E-07 | 46  |
|       | Corn   |          |                                              |          |     |
| Rumen | stover | Positive | development of head                          | 4.21E-07 | 375 |
|       | Corn   |          |                                              |          |     |
| Rumen | stover | Positive | proliferation of lymphocytes                 | 4.57E-07 | 284 |
|       | Corn   |          |                                              |          |     |
| Rumen | stover | Positive | small GTPase mediated signal transduction    | 4.99E-07 | 82  |
|       | Corn   |          |                                              |          |     |
| Rumen | stover | Positive | migration of myeloid cells                   | 5.20E-07 | 75  |
|       | Corn   |          |                                              |          |     |
| Rumen | stover | Positive | midline defect                               | 5.27E-07 | 113 |
|       | Corn   |          |                                              |          |     |
| Rumen | stover | Positive | proliferation of epithelial cells            | 5.47E-07 | 198 |
|       | Corn   |          |                                              |          |     |
| Rumen | stover | Positive | arrest in interphase                         | 8.10E-07 | 169 |
|       | Corn   |          |                                              |          |     |
| Rumen | stover | Positive | cell death of T lymphocytes                  | 8.52E-07 | 131 |
|       | Corn   |          |                                              |          |     |
| Rumen | stover | Positive | epileptic seizure                            | 8.92E-07 | 75  |
|       | Corn   |          |                                              |          |     |
| Rumen | stover | Positive | inflammatory response                        | 8.92E-07 | 301 |
|       | Corn   |          |                                              |          |     |
| Rumen | stover | Positive | mass of organism                             | 9.20E-07 | 138 |
|       | Corn   |          |                                              |          |     |
| Rumen | stover | Positive | accumulation of leukocytes                   | 9.46E-07 | 113 |
|       | Corn   |          |                                              |          |     |
| Rumen | stover | Positive | size of animal                               | 1.06E-06 | 79  |
| Rumen | Corn   | Positive | apoptosis of cervical cancer cell lines      | 1.18E-06 | 118 |

|       |        |          |                                            |          |     |
|-------|--------|----------|--------------------------------------------|----------|-----|
|       | stover |          |                                            |          |     |
|       | Corn   |          |                                            |          |     |
| Rumen | stover | Positive | recruitment of cells                       | 1.19E-06 | 146 |
|       | Corn   |          |                                            |          |     |
| Rumen | stover | Positive | cell death of mononuclear leukocytes       | 1.23E-06 | 161 |
|       | Corn   |          |                                            |          |     |
| Rumen | stover | Positive | quantity of hematopoietic cells            | 1.23E-06 | 178 |
|       | Corn   |          |                                            |          |     |
| Rumen | stover | Positive | proliferation of endothelial cells         | 1.23E-06 | 129 |
|       | Corn   |          |                                            |          |     |
| Rumen | stover | Positive | autosomal dominant disease                 | 1.34E-06 | 249 |
|       | Corn   |          |                                            |          |     |
| Rumen | stover | Positive | cell death of epithelial cell lines        | 1.40E-06 | 118 |
|       | Corn   |          |                                            |          |     |
| Rumen | stover | Positive | synthesis of fatty acid                    | 1.46E-06 | 129 |
|       | Corn   |          |                                            |          |     |
| Rumen | stover | Positive | abnormal morphology of reproductive system | 1.46E-06 | 202 |
|       | Corn   |          |                                            |          |     |
| Rumen | stover | Positive | quantity of hematopoietic progenitor cells | 1.56E-06 | 177 |
|       | Corn   |          |                                            |          |     |
| Rumen | stover | Positive | migration of phagocytes                    | 1.59E-06 | 115 |
|       | Corn   |          |                                            |          |     |
| Rumen | stover | Positive | cell death of pheochromocytoma cell lines  | 1.63E-06 | 56  |
|       | Corn   |          |                                            |          |     |
| Rumen | stover | Positive | arthropathy                                | 1.68E-06 | 361 |
|       | Corn   |          |                                            |          |     |
| Rumen | stover | Positive | proliferation of fibroblasts               | 1.68E-06 | 144 |
|       | Corn   |          |                                            |          |     |
| Rumen | stover | Positive | peripheral arterial disease                | 1.72E-06 | 91  |
|       | Corn   |          |                                            |          |     |
| Rumen | stover | Positive | proliferation of embryonic cells           | 1.75E-06 | 105 |
|       | Corn   |          |                                            |          |     |
| Rumen | stover | Positive | long-term potentiation                     | 1.76E-06 | 103 |
|       | Corn   |          |                                            |          |     |
| Rumen | stover | Positive | activation of enzyme                       | 1.84E-06 | 157 |
|       | Corn   |          |                                            |          |     |
| Rumen | stover | Positive | seizures                                   | 1.84E-06 | 161 |
|       | Corn   |          |                                            |          |     |
| Rumen | stover | Positive | proliferation of fibroblast cell lines     | 1.86E-06 | 170 |
|       | Corn   |          |                                            |          |     |
| Rumen | stover | Positive | morphology of reproductive system          | 1.87E-06 | 211 |
|       | Corn   |          |                                            |          |     |
| Rumen | stover | Positive | abnormal morphology of epithelial tissue   | 2.00E-06 | 168 |
| Rumen | Corn   | Positive | migration of connective tissue cells       | 2.10E-06 | 79  |

|       |        |          |                                                |          |     |
|-------|--------|----------|------------------------------------------------|----------|-----|
|       | stover |          |                                                |          |     |
|       | Corn   |          |                                                |          |     |
| Rumen | stover | Positive | Bleeding                                       | 2.12E-06 | 170 |
|       | Corn   |          |                                                |          |     |
| Rumen | stover | Positive | morphology of lymphatic system component       | 2.22E-06 | 167 |
|       | Corn   |          |                                                |          |     |
| Rumen | stover | Positive | function of phagocytes                         | 2.29E-06 | 126 |
|       | Corn   |          |                                                |          |     |
| Rumen | stover | Positive | reorganization of cytoskeleton                 | 2.31E-06 | 83  |
|       | Corn   |          |                                                |          |     |
| Rumen | stover | Positive | formation of T lymphocytes                     | 2.35E-06 | 54  |
|       | Corn   |          |                                                |          |     |
| Rumen | stover | Positive | cell movement of antigen presenting cells      | 2.36E-06 | 142 |
|       | Corn   |          |                                                |          |     |
| Rumen | stover | Positive | quantity of connective tissue                  | 2.45E-06 | 235 |
|       | Corn   |          |                                                |          |     |
| Rumen | stover | Positive | metabolism of membrane lipid derivative        | 2.67E-06 | 156 |
|       | Corn   |          | intermediate disease stage peripheral arterial |          |     |
| Rumen | stover | Positive | disease                                        | 2.69E-06 | 70  |
|       | Corn   |          |                                                |          |     |
| Rumen | stover | Positive | organization of filaments                      | 2.76E-06 | 88  |
|       | Corn   |          |                                                |          |     |
| Rumen | stover | Positive | growth of lymphatic system component           | 2.86E-06 | 83  |
|       | Corn   |          |                                                |          |     |
| Rumen | stover | Positive | cell death of lymphocytes                      | 2.96E-06 | 155 |
|       | Corn   |          |                                                |          |     |
| Rumen | stover | Positive | Cytosis                                        | 2.98E-06 | 131 |
|       | Corn   |          |                                                |          |     |
| Rumen | stover | Positive | proliferation of bone marrow cells             | 3.05E-06 | 55  |
|       | Corn   |          |                                                |          |     |
| Rumen | stover | Positive | muscle tumor                                   | 3.23E-06 | 146 |
|       | Corn   |          |                                                |          |     |
| Rumen | stover | Positive | blood protein disorder                         | 3.39E-06 | 151 |
|       | Corn   |          |                                                |          |     |
| Rumen | stover | Positive | formation of hematopoietic progenitor cells    | 3.54E-06 | 58  |
|       | Corn   |          |                                                |          |     |
| Rumen | stover | Positive | connective or soft tissue tumor                | 3.55E-06 | 271 |
|       | Corn   |          |                                                |          |     |
| Rumen | stover | Positive | activation of blood cells                      | 3.57E-06 | 286 |
|       | Corn   |          |                                                |          |     |
| Rumen | stover | Positive | arthritis                                      | 3.63E-06 | 353 |
|       | Corn   |          |                                                |          |     |
| Rumen | stover | Positive | metabolism of monosaccharide                   | 3.92E-06 | 56  |
| Rumen | Corn   | Positive | homing of blood cells                          | 4.03E-06 | 152 |

|       |        |          |                                        |          |     |
|-------|--------|----------|----------------------------------------|----------|-----|
|       | stover |          |                                        |          |     |
|       | Corn   |          |                                        |          |     |
| Rumen | stover | Positive | concentration of phospholipid          | 4.07E-06 | 79  |
|       | Corn   |          |                                        |          |     |
| Rumen | stover | Positive | behavior                               | 4.08E-06 | 371 |
|       | Corn   |          |                                        |          |     |
| Rumen | stover | Positive | migration of granulocytes              | 4.12E-06 | 64  |
|       | Corn   |          |                                        |          |     |
| Rumen | stover | Positive | cell death of tumor                    | 4.12E-06 | 153 |
|       | Corn   |          |                                        |          |     |
| Rumen | stover | Positive | morphology of bone                     | 4.25E-06 | 178 |
|       | Corn   |          |                                        |          |     |
| Rumen | stover | Positive | abnormal morphology of bone            | 4.29E-06 | 173 |
|       | Corn   |          |                                        |          |     |
| Rumen | stover | Positive | formation of mononuclear leukocytes    | 4.34E-06 | 59  |
|       | Corn   |          |                                        |          |     |
| Rumen | stover | Positive | morphology of central nervous system   | 4.46E-06 | 201 |
|       | Corn   |          |                                        |          |     |
| Rumen | stover | Positive | proliferation of T lymphocytes         | 4.49E-06 | 234 |
|       | Corn   |          |                                        |          |     |
| Rumen | stover | Positive | engulfment of cells                    | 4.73E-06 | 162 |
|       | Corn   |          |                                        |          |     |
| Rumen | stover | Positive | formation of lymphocytes               | 4.87E-06 | 57  |
|       | Corn   |          |                                        |          |     |
| Rumen | stover | Positive | necrosis of tumor                      | 5.23E-06 | 152 |
|       | Corn   |          |                                        |          |     |
| Rumen | stover | Positive | function of cardiovascular system      | 5.23E-06 | 148 |
|       | Corn   |          |                                        |          |     |
| Rumen | stover | Positive | movement of vascular endothelial cells | 5.49E-06 | 78  |
|       | Corn   |          |                                        |          |     |
| Rumen | stover | Positive | cell death of fibroblasts              | 5.63E-06 | 109 |
|       | Corn   |          |                                        |          |     |
| Rumen | stover | Positive | apoptosis of leukocytes                | 5.63E-06 | 180 |
|       | Corn   |          |                                        |          |     |
| Rumen | stover | Positive | growth of muscle tissue                | 6.24E-06 | 149 |
|       | Corn   |          |                                        |          |     |
| Rumen | stover | Positive | recruitment of leukocytes              | 6.31E-06 | 131 |
|       | Corn   |          |                                        |          |     |
| Rumen | stover | Positive | quantity of carbohydrate               | 6.35E-06 | 202 |
|       | Corn   |          |                                        |          |     |
| Rumen | stover | Positive | chemotaxis of myeloid cells            | 6.35E-06 | 119 |
|       | Corn   |          |                                        |          |     |
| Rumen | stover | Positive | differentiation of T lymphocytes       | 6.62E-06 | 151 |
| Rumen | Corn   | Positive | chemotaxis of phagocytes               | 6.71E-06 | 120 |

|       |        |          |                                              |          |      |
|-------|--------|----------|----------------------------------------------|----------|------|
|       | stover |          |                                              |          |      |
|       | Corn   |          |                                              |          |      |
| Rumen | stover | Positive | ruffling                                     | 6.77E-06 | 50   |
|       | Corn   |          |                                              |          |      |
| Rumen | stover | Positive | differentiation of mononuclear leukocytes    | 6.93E-06 | 210  |
|       | Corn   |          |                                              |          |      |
| Rumen | stover | Positive | breast or colorectal cancer                  | 7.23E-06 | 1711 |
|       | Corn   |          |                                              |          |      |
| Rumen | stover | Positive | homing of leukocytes                         | 7.30E-06 | 150  |
|       | Corn   |          | abnormal morphology of central nervous       |          |      |
| Rumen | stover | Positive | system                                       | 7.39E-06 | 189  |
|       | Corn   |          |                                              |          |      |
| Rumen | stover | Positive | entrance of Ca <sup>2+</sup>                 | 7.44E-06 | 38   |
|       | Corn   |          |                                              |          |      |
| Rumen | stover | Positive | function of mononuclear leukocytes           | 8.03E-06 | 137  |
|       | Corn   |          |                                              |          |      |
| Rumen | stover | Positive | uptake of D-hexose                           | 8.03E-06 | 93   |
|       | Corn   |          |                                              |          |      |
| Rumen | stover | Positive | quantity of macrophages                      | 8.03E-06 | 85   |
|       | Corn   |          |                                              |          |      |
| Rumen | stover | Positive | neurotransmission                            | 8.03E-06 | 163  |
|       | Corn   |          |                                              |          |      |
| Rumen | stover | Positive | quantity of myeloid cells                    | 8.36E-06 | 142  |
|       | Corn   |          |                                              |          |      |
| Rumen | stover | Positive | transport of protein                         | 8.61E-06 | 122  |
|       | Corn   |          |                                              |          |      |
| Rumen | stover | Positive | branching of cells                           | 8.61E-06 | 147  |
|       | Corn   |          |                                              |          |      |
| Rumen | stover | Positive | development of digestive system              | 8.73E-06 | 152  |
|       | Corn   |          |                                              |          |      |
| Rumen | stover | Positive | cell viability of cervical cancer cell lines | 8.73E-06 | 92   |
|       | Corn   |          |                                              |          |      |
| Rumen | stover | Positive | uptake of D-glucose                          | 8.73E-06 | 92   |
|       | Corn   |          |                                              |          |      |
| Rumen | stover | Positive | quantity of phagocytes                       | 8.73E-06 | 167  |
|       | Corn   |          |                                              |          |      |
| Rumen | stover | Positive | formation of muscle                          | 8.76E-06 | 157  |
|       | Corn   |          |                                              |          |      |
| Rumen | stover | Positive | concentration of phosphatidic acid           | 8.86E-06 | 60   |
|       | Corn   |          |                                              |          |      |
| Rumen | stover | Positive | growth of embryonic tissue                   | 9.23E-06 | 112  |
|       | Corn   |          |                                              |          |      |
| Rumen | stover | Positive | differentiation of connective tissue cells   | 9.32E-06 | 246  |
| Rumen | Corn   | Positive | apoptosis of epithelial cell lines           | 9.45E-06 | 93   |

|       |        |          |                                         |          |     |
|-------|--------|----------|-----------------------------------------|----------|-----|
|       | stover |          |                                         |          |     |
|       | Corn   |          |                                         |          |     |
| Rumen | stover | Positive | cell movement of lymphocytes            | 9.67E-06 | 156 |
|       | Corn   |          |                                         |          |     |
| Rumen | stover | Positive | morphogenesis of neurons                | 9.80E-06 | 167 |
|       | Corn   |          |                                         |          |     |
| Rumen | stover | Positive | serous neoplasm                         | 9.80E-06 | 234 |
|       | Corn   |          |                                         |          |     |
| Rumen | stover | Positive | recruitment of blood cells              | 9.80E-06 | 132 |
|       | Corn   |          |                                         |          |     |
| Rumen | stover | Positive | autophagy of cells                      | 9.90E-06 | 108 |
|       | Corn   |          |                                         |          |     |
| Rumen | stover | Positive | function of lymphocytes                 | 9.90E-06 | 136 |
|       | Corn   |          |                                         |          |     |
| Rumen | stover | Positive | infection of embryonic cell lines       | 1.07E-05 | 112 |
|       | Corn   |          |                                         |          |     |
| Rumen | stover | Positive | infection of epithelial cell lines      | 1.07E-05 | 112 |
|       | Corn   |          |                                         |          |     |
| Rumen | stover | Positive | congenital malformation of skeleton     | 1.07E-05 | 166 |
|       | Corn   |          |                                         |          |     |
| Rumen | stover | Positive | death of perinatal stage organism       | 1.08E-05 | 39  |
|       | Corn   |          |                                         |          |     |
| Rumen | stover | Positive | cell death of stem cells                | 1.09E-05 | 40  |
|       | Corn   |          |                                         |          |     |
| Rumen | stover | Positive | proliferation of muscle cells           | 1.09E-05 | 147 |
|       | Corn   |          |                                         |          |     |
| Rumen | stover | Positive | benign neoplasm of female genital organ | 1.09E-05 | 167 |
|       | Corn   |          |                                         |          |     |
| Rumen | stover | Positive | proliferation of tumor cells            | 1.15E-05 | 183 |
|       | Corn   |          |                                         |          |     |
| Rumen | stover | Positive | seizure disorder                        | 1.15E-05 | 183 |
|       | Corn   |          |                                         |          |     |
| Rumen | stover | Positive | abnormal morphology of blood vessel     | 1.15E-05 | 108 |
|       | Corn   |          |                                         |          |     |
| Rumen | stover | Positive | homing of endothelial cells             | 1.15E-05 | 32  |
|       | Corn   |          |                                         |          |     |
| Rumen | stover | Positive | differentiation of lymphocytes          | 1.17E-05 | 193 |
|       | Corn   |          |                                         |          |     |
| Rumen | stover | Positive | paraproteinemia                         | 1.20E-05 | 134 |
|       | Corn   |          |                                         |          |     |
| Rumen | stover | Positive | skin abnormality                        | 1.20E-05 | 94  |
|       | Corn   |          |                                         |          |     |
| Rumen | stover | Positive | breast or ovarian cancer                | 1.20E-05 | 684 |
| Rumen | Corn   | Positive | cell movement of mononuclear leukocytes | 1.21E-05 | 180 |



|       |        |          |                                          |          |      |
|-------|--------|----------|------------------------------------------|----------|------|
|       | stover |          |                                          |          |      |
|       | Corn   |          |                                          |          |      |
| Rumen | stover | Positive | cell death of tumor cells                | 1.22E-05 | 147  |
|       | Corn   |          |                                          |          |      |
| Rumen | stover | Positive | quantity of antigen presenting cells     | 1.22E-05 | 112  |
|       | Corn   |          |                                          |          |      |
| Rumen | stover | Positive | synthesis of nitric oxide                | 1.22E-05 | 112  |
|       | Corn   |          |                                          |          |      |
| Rumen | stover | Positive | formation of thymocytes                  | 1.27E-05 | 48   |
|       | Corn   |          |                                          |          |      |
| Rumen | stover | Positive | quantity of lymphatic system component   | 1.29E-05 | 149  |
|       | Corn   |          |                                          |          |      |
| Rumen | stover | Positive | differentiation of connective tissue     | 1.29E-05 | 276  |
|       | Corn   |          |                                          |          |      |
| Rumen | stover | Positive | formation of skin                        | 1.30E-05 | 145  |
|       | Corn   |          |                                          |          |      |
| Rumen | stover | Positive | craniofacial abnormality                 | 1.31E-05 | 141  |
|       | Corn   |          |                                          |          |      |
| Rumen | stover | Positive | Gastrointestinal Tract Cancer and Tumors | 1.34E-05 | 1764 |
|       | Corn   |          |                                          |          |      |
| Rumen | stover | Positive | abnormal morphology of lymphoid organ    | 1.47E-05 | 149  |
|       | Corn   |          |                                          |          |      |
| Rumen | stover | Positive | formation of eye                         | 1.47E-05 | 171  |
|       | Corn   |          |                                          |          |      |
| Rumen | stover | Positive | Hypoplasia                               | 1.47E-05 | 195  |
|       | Corn   |          |                                          |          |      |
| Rumen | stover | Positive | formation of actin filaments             | 1.48E-05 | 122  |
|       | Corn   |          |                                          |          |      |
| Rumen | stover | Positive | gastrointestinal carcinoma               | 1.50E-05 | 1561 |
|       | Corn   |          |                                          |          |      |
| Rumen | stover | Positive | quantity of lymphoid organ               | 1.54E-05 | 123  |
|       | Corn   |          |                                          |          |      |
| Rumen | stover | Positive | smooth muscle tumor                      | 1.64E-05 | 121  |
|       | Corn   |          |                                          |          |      |
| Rumen | stover | Positive | cell death of cerebral cortex cells      | 1.69E-05 | 94   |
|       | Corn   |          |                                          |          |      |
| Rumen | stover | Positive | cell death of muscle cells               | 1.73E-05 | 133  |
|       | Corn   |          |                                          |          |      |
| Rumen | stover | Positive | plasma cell dyscrasia                    | 1.73E-05 | 133  |
|       | Corn   |          |                                          |          |      |
| Rumen | stover | Positive | development of sensory organ             | 1.74E-05 | 216  |
|       | Corn   |          |                                          |          |      |
| Rumen | stover | Positive | formation of lamellipodia                | 1.74E-05 | 69   |
| Rumen | Corn   | Positive | cell movement of muscle cells            | 1.75E-05 | 76   |

|       |        |          |                                      |          |      |
|-------|--------|----------|--------------------------------------|----------|------|
|       | stover |          |                                      |          |      |
|       | Corn   |          |                                      |          |      |
| Rumen | stover | Positive | adhesion of immune cells             | 1.77E-05 | 138  |
|       | Corn   |          |                                      |          |      |
| Rumen | stover | Positive | infection of kidney cell lines       | 1.84E-05 | 114  |
|       | Corn   |          |                                      |          |      |
| Rumen | stover | Positive | length of cells                      | 1.84E-05 | 46   |
|       | Corn   |          |                                      |          |      |
| Rumen | stover | Positive | oral cancer                          | 1.84E-05 | 93   |
|       | Corn   |          |                                      |          |      |
| Rumen | stover | Positive | morphology of respiratory system     | 1.84E-05 | 124  |
|       | Corn   |          |                                      |          |      |
| Rumen | stover | Positive | cellular infiltration of blood cells | 2.03E-05 | 152  |
|       | Corn   |          |                                      |          |      |
| Rumen | stover | Positive | transmigration of cells              | 2.07E-05 | 67   |
|       | Corn   |          |                                      |          |      |
| Rumen | stover | Positive | morphology of brain                  | 2.11E-05 | 180  |
|       | Corn   |          |                                      |          |      |
| Rumen | stover | Positive | peripheral vascular disease          | 2.12E-05 | 149  |
|       | Corn   |          |                                      |          |      |
| Rumen | stover | Positive | quantity of IL-6 in blood            | 2.12E-05 | 40   |
|       | Corn   |          |                                      |          |      |
| Rumen | stover | Positive | morphology of digestive system       | 2.12E-05 | 218  |
|       | Corn   |          |                                      |          |      |
| Rumen | stover | Positive | genital tumor                        | 2.18E-05 | 1396 |
|       | Corn   |          |                                      |          |      |
| Rumen | stover | Positive | adhesion of tumor cell lines         | 2.23E-05 | 115  |
|       | Corn   |          |                                      |          |      |
| Rumen | stover | Positive | multiple congenital anomalies        | 2.30E-05 | 164  |
|       | Corn   |          |                                      |          |      |
| Rumen | stover | Positive | morphology of lymphoid organ         | 2.34E-05 | 153  |
|       | Corn   |          |                                      |          |      |
| Rumen | stover | Positive | formation of muscle cells            | 2.34E-05 | 75   |
|       | Corn   |          |                                      |          |      |
| Rumen | stover | Positive | cell movement of macrophages         | 2.34E-05 | 107  |
|       | Corn   |          |                                      |          |      |
| Rumen | stover | Positive | oral tumor                           | 2.40E-05 | 120  |
|       | Corn   |          |                                      |          |      |
| Rumen | stover | Positive | apoptosis of epithelial cells        | 2.47E-05 | 114  |
|       | Corn   |          |                                      |          |      |
| Rumen | stover | Positive | synaptic transmission                | 2.57E-05 | 133  |
|       | Corn   |          |                                      |          |      |
| Rumen | stover | Positive | oral squamous cell carcinoma         | 2.57E-05 | 74   |
| Rumen | Corn   | Positive | binding of protein binding site      | 2.58E-05 | 115  |

|       |        |          |                                        |          |      |
|-------|--------|----------|----------------------------------------|----------|------|
|       | stover |          |                                        |          |      |
|       | Corn   |          |                                        |          |      |
| Rumen | stover | Positive | adenocarcinoma                         | 2.65E-05 | 2209 |
|       | Corn   |          |                                        |          |      |
| Rumen | stover | Positive | dysgenesis                             | 2.68E-05 | 206  |
|       | Corn   |          |                                        |          |      |
| Rumen | stover | Positive | colony formation of tumor cell lines   | 2.73E-05 | 110  |
|       | Corn   |          |                                        |          |      |
| Rumen | stover | Positive | metabolism of DNA                      | 2.73E-05 | 155  |
|       | Corn   |          |                                        |          |      |
| Rumen | stover | Positive | Thrombosis                             | 2.73E-05 | 71   |
|       | Corn   |          |                                        |          |      |
| Rumen | stover | Positive | cellular infiltration by leukocytes    | 2.84E-05 | 151  |
|       | Corn   |          |                                        |          |      |
| Rumen | stover | Positive | degeneration of central nervous system | 2.84E-05 | 57   |
|       | Corn   |          |                                        |          |      |
| Rumen | stover | Positive | apoptosis of muscle                    | 2.85E-05 | 105  |
|       | Corn   |          |                                        |          |      |
| Rumen | stover | Positive | gastrointestinal tract cancer          | 2.86E-05 | 1732 |
|       | Corn   |          |                                        |          |      |
| Rumen | stover | Positive | cell movement of smooth muscle cells   | 2.88E-05 | 68   |
|       | Corn   |          |                                        |          |      |
| Rumen | stover | Positive | abnormal morphology of brain           | 2.89E-05 | 172  |
|       | Corn   |          |                                        |          |      |
| Rumen | stover | Positive | adhesion of blood cells                | 2.89E-05 | 147  |
|       | Corn   |          |                                        |          |      |
| Rumen | stover | Positive | metabolism of hexose                   | 2.97E-05 | 48   |
|       | Corn   |          |                                        |          |      |
| Rumen | stover | Positive | cognition                              | 3.01E-05 | 175  |
|       | Corn   |          |                                        |          |      |
| Rumen | stover | Positive | invasion of tumor                      | 3.03E-05 | 98   |
|       | Corn   |          |                                        |          |      |
| Rumen | stover | Positive | cell death of muscle                   | 3.06E-05 | 135  |
|       | Corn   |          |                                        |          |      |
| Rumen | stover | Positive | cellular infiltration                  | 3.08E-05 | 169  |
|       | Corn   |          |                                        |          |      |
| Rumen | stover | Positive | morphogenesis of neurites              | 3.08E-05 | 162  |
|       | Corn   |          |                                        |          |      |
| Rumen | stover | Positive | metabolism of polysaccharide           | 3.13E-05 | 96   |
|       | Corn   |          |                                        |          |      |
| Rumen | stover | Positive | mammary tumor                          | 3.19E-05 | 587  |
|       | Corn   |          |                                        |          |      |
| Rumen | stover | Positive | fertility                              | 3.26E-05 | 142  |
| Rumen | Corn   | Positive | advanced malignant tumor               | 3.31E-05 | 314  |

|       |        |          |                                           |          |      |
|-------|--------|----------|-------------------------------------------|----------|------|
|       | stover |          |                                           |          |      |
|       | Corn   |          |                                           |          |      |
| Rumen | stover | Positive | differentiation of muscle cell lines      | 3.55E-05 | 68   |
|       | Corn   |          |                                           |          |      |
| Rumen | stover | Positive | abdominal adenocarcinoma                  | 3.61E-05 | 2011 |
|       | Corn   |          |                                           |          |      |
| Rumen | stover | Positive | apoptosis of muscle cells                 | 3.66E-05 | 104  |
|       | Corn   |          |                                           |          |      |
| Rumen | stover | Positive | activation of leukocytes                  | 3.68E-05 | 262  |
|       | Corn   |          |                                           |          |      |
| Rumen | stover | Positive | shape change of tumor cell lines          | 3.71E-05 | 65   |
|       | Corn   |          |                                           |          |      |
| Rumen | stover | Positive | abnormal morphology of respiratory system | 3.75E-05 | 121  |
|       | Corn   |          |                                           |          |      |
| Rumen | stover | Positive | recruitment of phagocytes                 | 3.77E-05 | 99   |
|       | Corn   |          |                                           |          |      |
| Rumen | stover | Positive | necrosis of muscle                        | 3.85E-05 | 134  |
|       | Corn   |          |                                           |          |      |
| Rumen | stover | Positive | size of embryo                            | 3.87E-05 | 139  |
|       | Corn   |          |                                           |          |      |
| Rumen | stover | Positive | cell movement of leukemia cell lines      | 3.87E-05 | 59   |
|       | Corn   |          |                                           |          |      |
| Rumen | stover | Positive | stress response of cells                  | 3.87E-05 | 59   |
|       | Corn   |          |                                           |          |      |
| Rumen | stover | Positive | quantity of B lymphocytes                 | 3.94E-05 | 135  |
|       | Corn   |          |                                           |          |      |
| Rumen | stover | Positive | migration of muscle cells                 | 3.95E-05 | 69   |
|       | Corn   |          |                                           |          |      |
| Rumen | stover | Positive | morphology of cardiovascular tissue       | 4.01E-05 | 40   |
|       | Corn   |          |                                           |          |      |
| Rumen | stover | Positive | recruitment of macrophages                | 4.09E-05 | 47   |
|       | Corn   |          |                                           |          |      |
| Rumen | stover | Positive | proliferation of smooth muscle cells      | 4.11E-05 | 113  |
|       | Corn   |          |                                           |          |      |
| Rumen | stover | Positive | synthesis of polysaccharide               | 4.11E-05 | 75   |
|       | Corn   |          |                                           |          |      |
| Rumen | stover | Positive | chronic psoriasis                         | 4.11E-05 | 61   |
|       | Corn   |          |                                           |          |      |
| Rumen | stover | Positive | Dermatitis                                | 4.12E-05 | 167  |
|       | Corn   |          |                                           |          |      |
| Rumen | stover | Positive | cell death of hematopoietic cell lines    | 4.17E-05 | 93   |
|       | Corn   |          |                                           |          |      |
| Rumen | stover | Positive | learning                                  | 4.21E-05 | 161  |
| Rumen | Corn   | Positive | apoptosis of T lymphocytes                | 4.33E-05 | 111  |

|       |        |          |                                               |          |     |
|-------|--------|----------|-----------------------------------------------|----------|-----|
|       | stover |          |                                               |          |     |
|       | Corn   |          |                                               |          |     |
| Rumen | stover | Positive | apoptosis of mononuclear leukocytes           | 4.33E-05 | 139 |
|       | Corn   |          |                                               |          |     |
| Rumen | stover | Positive | development of hematopoietic tissue           | 4.39E-05 | 54  |
|       | Corn   |          |                                               |          |     |
| Rumen | stover | Positive | cell death of brain                           | 4.44E-05 | 115 |
|       | Corn   |          |                                               |          |     |
| Rumen | stover | Positive | oral cavity carcinoma                         | 4.44E-05 | 80  |
|       | Corn   |          |                                               |          |     |
| Rumen | stover | Positive | quantity of lymphatic system cells            | 4.57E-05 | 109 |
|       | Corn   |          |                                               |          |     |
| Rumen | stover | Positive | Ovarian Cancer and Tumors                     | 4.63E-05 | 282 |
|       | Corn   |          |                                               |          |     |
| Rumen | stover | Positive | benign connective or soft tissue neoplasm     | 4.64E-05 | 142 |
|       | Corn   |          |                                               |          |     |
| Rumen | stover | Positive | leiomyomatosis                                | 4.70E-05 | 113 |
|       | Corn   |          |                                               |          |     |
| Rumen | stover | Positive | formation of filopodia                        | 4.77E-05 | 69  |
|       | Corn   |          |                                               |          |     |
| Rumen | stover | Positive | function of antigen presenting cells          | 4.77E-05 | 98  |
|       | Corn   |          |                                               |          |     |
| Rumen | stover | Positive | growth of skin                                | 4.88E-05 | 88  |
|       | Corn   |          |                                               |          |     |
| Rumen | stover | Positive | cell death of breast cancer cell lines        | 4.94E-05 | 130 |
|       | Corn   |          |                                               |          |     |
| Rumen | stover | Positive | susceptibility to endotoxin shock             | 4.94E-05 | 25  |
|       | Corn   |          |                                               |          |     |
| Rumen | stover | Positive | formation of actin stress fibers              | 4.97E-05 | 96  |
|       | Corn   |          |                                               |          |     |
| Rumen | stover | Positive | chronic myeloproliferative disorder           | 5.07E-05 | 66  |
|       | Corn   |          |                                               |          |     |
| Rumen | stover | Positive | apoptosis of neurons                          | 5.08E-05 | 167 |
|       | Corn   |          |                                               |          |     |
| Rumen | stover | Positive | chemotaxis of endothelial cells               | 5.11E-05 | 30  |
|       | Corn   |          |                                               |          |     |
| Rumen | stover | Positive | cellular infiltration of cells                | 5.11E-05 | 153 |
|       | Corn   |          |                                               |          |     |
| Rumen | stover | Positive | cell death of B-lymphocyte derived cell lines | 5.14E-05 | 55  |
|       | Corn   |          |                                               |          |     |
| Rumen | stover | Positive | immune response of cells                      | 5.23E-05 | 216 |
|       | Corn   |          |                                               |          |     |
| Rumen | stover | Positive | apoptosis of cerebral cortex cells            | 5.25E-05 | 47  |
| Rumen | Corn   | Positive | chronic myeloid leukemia                      | 5.25E-05 | 47  |

|       |        |          |                                              |          |     |
|-------|--------|----------|----------------------------------------------|----------|-----|
|       | stover |          |                                              |          |     |
|       | Corn   |          |                                              |          |     |
| Rumen | stover | Positive | sprouting                                    | 5.31E-05 | 149 |
|       | Corn   |          |                                              |          |     |
| Rumen | stover | Positive | cell death of cortical neurons               | 5.31E-05 | 72  |
|       | Corn   |          |                                              |          |     |
| Rumen | stover | Positive | G1 phase                                     | 5.40E-05 | 150 |
|       | Corn   |          |                                              |          |     |
| Rumen | stover | Positive | migration of breast cancer cell lines        | 5.51E-05 | 98  |
|       | Corn   |          |                                              |          |     |
| Rumen | stover | Positive | morphology of endothelial tissue             | 5.62E-05 | 38  |
|       | Corn   |          |                                              |          |     |
| Rumen | stover | Positive | grade 1 lymphocytic cancer                   | 5.67E-05 | 33  |
|       | Corn   |          |                                              |          |     |
| Rumen | stover | Positive | synthesis of DNA                             | 5.69E-05 | 160 |
|       | Corn   |          |                                              |          |     |
| Rumen | stover | Positive | metastasis                                   | 5.74E-05 | 282 |
|       | Corn   |          |                                              |          |     |
| Rumen | stover | Positive | migration of cancer cells                    | 5.74E-05 | 79  |
|       | Corn   |          |                                              |          |     |
| Rumen | stover | Positive | transport of carbohydrate                    | 5.74E-05 | 79  |
|       | Corn   |          |                                              |          |     |
| Rumen | stover | Positive | cell death of sarcoma cell lines             | 5.84E-05 | 91  |
|       | Corn   |          |                                              |          |     |
| Rumen | stover | Positive | gonadal tumor                                | 5.85E-05 | 303 |
|       | Corn   |          |                                              |          |     |
| Rumen | stover | Positive | apoptosis of B-lymphocyte derived cell lines | 5.87E-05 | 53  |
|       | Corn   |          |                                              |          |     |
| Rumen | stover | Positive | quantity of interleukin                      | 5.87E-05 | 59  |
|       | Corn   |          |                                              |          |     |
| Rumen | stover | Positive | activation of Protein kinase                 | 6.07E-05 | 100 |
|       | Corn   |          |                                              |          |     |
| Rumen | stover | Positive | differentiation of epithelial tissue         | 6.09E-05 | 139 |
|       | Corn   |          |                                              |          |     |
| Rumen | stover | Positive | secretory pathway                            | 6.21E-05 | 80  |
|       | Corn   |          |                                              |          |     |
| Rumen | stover | Positive | differentiation of tumor cell lines          | 6.26E-05 | 146 |
|       | Corn   |          |                                              |          |     |
| Rumen | stover | Positive | abnormal morphology of skeleton              | 6.28E-05 | 107 |
|       | Corn   |          |                                              |          |     |
| Rumen | stover | Positive | function of myeloid cells                    | 6.28E-05 | 95  |
|       | Corn   |          |                                              |          |     |
| Rumen | stover | Positive | accumulation of myeloid cells                | 6.36E-05 | 72  |
| Rumen | Corn   | Positive | formation of connective tissue cells         | 6.37E-05 | 85  |

|       |        |          |                                         |          |     |
|-------|--------|----------|-----------------------------------------|----------|-----|
|       | stover |          |                                         |          |     |
|       | Corn   |          |                                         |          |     |
| Rumen | stover | Positive | migration of tumor cells                | 6.38E-05 | 90  |
|       | Corn   |          |                                         |          |     |
| Rumen | stover | Positive | migration of fibroblasts                | 6.74E-05 | 60  |
|       | Corn   |          |                                         |          |     |
| Rumen | stover | Positive | quantity of immunoglobulin              | 6.78E-05 | 116 |
|       | Corn   |          |                                         |          |     |
| Rumen | stover | Positive | apoptosis of lymphocytes                | 6.90E-05 | 134 |
|       | Corn   |          |                                         |          |     |
| Rumen | stover | Positive | development of genitourinary system     | 7.02E-05 | 326 |
|       | Corn   |          |                                         |          |     |
| Rumen | stover | Positive | migration of smooth muscle cells        | 7.03E-05 | 62  |
|       | Corn   |          |                                         |          |     |
| Rumen | stover | Positive | development of connective tissue cells  | 7.06E-05 | 89  |
|       | Corn   |          |                                         |          |     |
| Rumen | stover | Positive | morphology of genital organ             | 7.20E-05 | 162 |
|       | Corn   |          |                                         |          |     |
| Rumen | stover | Positive | cell death of embryonic cells           | 7.21E-05 | 50  |
|       | Corn   |          |                                         |          |     |
| Rumen | stover | Positive | quantity of thymocytes                  | 7.21E-05 | 92  |
|       | Corn   |          |                                         |          |     |
| Rumen | stover | Positive | abnormal morphology of digestive system | 7.22E-05 | 205 |
|       | Corn   |          |                                         |          |     |
| Rumen | stover | Positive | development of bone marrow              | 7.42E-05 | 53  |
|       | Corn   |          |                                         |          |     |
| Rumen | stover | Positive | hereditary neuropathy                   | 7.57E-05 | 68  |
|       | Corn   |          |                                         |          |     |
| Rumen | stover | Positive | migration of leukemia cell lines        | 7.81E-05 | 37  |
|       | Corn   |          |                                         |          |     |
| Rumen | stover | Positive | replication of Influenza virus          | 7.98E-05 | 113 |
|       | Corn   |          |                                         |          |     |
| Rumen | stover | Positive | invasion of tissue                      | 8.14E-05 | 79  |
|       | Corn   |          |                                         |          |     |
| Rumen | stover | Positive | aggregation of cells                    | 8.14E-05 | 126 |
|       | Corn   |          |                                         |          |     |
| Rumen | stover | Positive | neovascularization                      | 8.33E-05 | 67  |
|       | Corn   |          |                                         |          |     |
| Rumen | stover | Positive | cell movement of tumor cells            | 8.37E-05 | 75  |
|       | Corn   |          |                                         |          |     |
| Rumen | stover | Positive | bone mineral density                    | 8.44E-05 | 71  |
|       | Corn   |          |                                         |          |     |
| Rumen | stover | Positive | uterine serous papillary cancer         | 8.45E-05 | 92  |
| Rumen | Corn   | Positive | attachment of cells                     | 8.62E-05 | 57  |

|       |        |          |                               |          |      |
|-------|--------|----------|-------------------------------|----------|------|
|       | stover |          |                               |          |      |
|       | Corn   |          |                               |          |      |
| Rumen | stover | Positive | chronic inflammatory disorder | 8.64E-05 | 355  |
|       | Corn   |          |                               |          |      |
| Rumen | stover | Positive | accumulation of granulocytes  | 8.79E-05 | 47   |
|       | Corn   |          |                               |          |      |
| Rumen | stover | Positive | proliferation of cancer cells | 8.84E-05 | 140  |
|       | Corn   |          |                               |          |      |
| Rumen | stover | Positive | entry into S phase            | 9.06E-05 | 59   |
|       | Corn   |          |                               |          |      |
| Rumen | stover | Positive | generation of lymphocytes     | 9.06E-05 | 59   |
|       | Corn   |          |                               |          |      |
| Rumen | stover | Positive | formation of lung             | 9.12E-05 | 117  |
|       | Corn   |          |                               |          |      |
| Rumen | stover | Negative | organismal death              | 2.27E-27 | 650  |
|       | Corn   |          |                               |          |      |
| Rumen | stover | Negative | proliferation of cells        | 2.27E-27 | 926  |
|       | Corn   |          |                               |          |      |
| Rumen | stover | Negative | morbidity or mortality        | 7.15E-27 | 654  |
|       | Corn   |          |                               |          |      |
| Rumen | stover | Negative | morphology of cells           | 3.69E-22 | 529  |
|       | Corn   |          |                               |          |      |
| Rumen | stover | Negative | cell death                    | 2.28E-21 | 823  |
|       | Corn   |          |                               |          |      |
| Rumen | stover | Negative | malignant solid tumor         | 2.66E-20 | 2245 |
|       | Corn   |          |                               |          |      |
| Rumen | stover | Negative | necrosis                      | 3.23E-20 | 656  |
|       | Corn   |          |                               |          |      |
| Rumen | stover | Negative | cancer                        | 3.42E-20 | 2268 |
|       | Corn   |          |                               |          |      |
| Rumen | stover | Negative | apoptosis                     | 5.31E-19 | 665  |
|       | Corn   |          |                               |          |      |
| Rumen | stover | Negative | cell movement                 | 6.97E-19 | 554  |
|       | Corn   |          |                               |          |      |
| Rumen | stover | Negative | cell survival                 | 6.42E-17 | 383  |
|       | Corn   |          |                               |          |      |
| Rumen | stover | Negative | organization of cytoplasm     | 7.28E-17 | 414  |
|       | Corn   |          |                               |          |      |
| Rumen | stover | Negative | quantity of cells             | 2.47E-16 | 464  |
|       | Corn   |          |                               |          |      |
| Rumen | stover | Negative | transport of molecule         | 1.51E-15 | 426  |
|       | Corn   |          |                               |          |      |
| Rumen | stover | Negative | cell viability                | 1.67E-15 | 356  |
| Rumen | Corn   | Negative | migration of cells            | 3.17E-15 | 488  |



|       |        |          |                                              |          |      |
|-------|--------|----------|----------------------------------------------|----------|------|
|       | stover |          |                                              |          |      |
|       | Corn   |          |                                              |          |      |
| Rumen | stover | Negative | organization of cytoskeleton                 | 3.17E-15 | 376  |
|       | Corn   |          |                                              |          |      |
| Rumen | stover | Negative | transcription                                | 7.33E-15 | 506  |
|       | Corn   |          |                                              |          |      |
| Rumen | stover | Negative | expression of RNA                            | 1.46E-14 | 537  |
|       | Corn   |          |                                              |          |      |
| Rumen | stover | Negative | transcription of RNA                         | 3.39E-14 | 473  |
|       | Corn   |          |                                              |          |      |
| Rumen | stover | Negative | vasculogenesis                               | 1.53E-13 | 217  |
|       | Corn   |          |                                              |          |      |
| Rumen | stover | Negative | cell movement of tumor cell lines            | 2.08E-13 | 244  |
|       | Corn   |          |                                              |          |      |
| Rumen | stover | Negative | development of vasculature                   | 3.68E-13 | 136  |
|       | Corn   |          |                                              |          |      |
| Rumen | stover | Negative | morphology of cardiovascular system          | 7.31E-13 | 186  |
|       | Corn   |          |                                              |          |      |
| Rumen | stover | Negative | proliferation of tumor cell lines            | 7.51E-13 | 399  |
|       | Corn   |          |                                              |          |      |
| Rumen | stover | Negative | tumorigenesis of tissue                      | 7.82E-13 | 1888 |
|       | Corn   |          |                                              |          |      |
| Rumen | stover | Negative | transcription of DNA                         | 1.30E-12 | 395  |
|       | Corn   |          |                                              |          |      |
| Rumen | stover | Negative | invasion of cells                            | 1.37E-12 | 245  |
|       | Corn   |          |                                              |          |      |
| Rumen | stover | Negative | abnormal morphology of cells                 | 1.42E-12 | 335  |
|       | Corn   |          |                                              |          |      |
| Rumen | stover | Negative | proliferation of connective tissue cells     | 1.66E-12 | 178  |
|       | Corn   |          |                                              |          |      |
| Rumen | stover | Negative | cell death of tumor cell lines               | 1.74E-12 | 392  |
|       | Corn   |          |                                              |          |      |
| Rumen | stover | Negative | neoplasia of epithelial tissue               | 2.61E-12 | 1856 |
|       | Corn   |          |                                              |          |      |
| Rumen | stover | Negative | angiogenesis                                 | 6.08E-12 | 251  |
|       | Corn   |          |                                              |          |      |
| Rumen | stover | Negative | growth of connective tissue                  | 9.27E-12 | 188  |
|       | Corn   |          |                                              |          |      |
| Rumen | stover | Negative | microtubule dynamics                         | 9.27E-12 | 313  |
|       | Corn   |          |                                              |          |      |
| Rumen | stover | Negative | abnormal morphology of cardiovascular system | 1.07E-11 | 169  |
|       | Corn   |          |                                              |          |      |
| Rumen | stover | Negative | epithelial cancer                            | 1.26E-11 | 1835 |
| Rumen | Corn   | Negative | differentiation of cells                     | 2.12E-11 | 541  |

|       |        |          |                                        |          |      |
|-------|--------|----------|----------------------------------------|----------|------|
|       | stover |          |                                        |          |      |
|       | Corn   |          |                                        |          |      |
| Rumen | stover | Negative | apoptosis of tumor cell lines          | 2.54E-11 | 317  |
|       | Corn   |          |                                        |          |      |
| Rumen | stover | Negative | perinatal death                        | 6.08E-11 | 173  |
|       | Corn   |          |                                        |          |      |
| Rumen | stover | Negative | cellular homeostasis                   | 1.69E-10 | 381  |
|       | Corn   |          |                                        |          |      |
| Rumen | stover | Negative | morphology of body cavity              | 2.32E-10 | 309  |
|       | Corn   |          |                                        |          |      |
| Rumen | stover | Negative | abnormal morphology of thoracic cavity | 2.50E-10 | 169  |
|       | Corn   |          |                                        |          |      |
| Rumen | stover | Negative | quantity of leukocytes                 | 2.95E-10 | 246  |
|       | Corn   |          |                                        |          |      |
| Rumen | stover | Negative | cell viability of tumor cell lines     | 3.53E-10 | 214  |
|       | Corn   |          |                                        |          |      |
| Rumen | stover | Negative | quantity of blood cells                | 5.47E-10 | 270  |
|       | Corn   |          |                                        |          |      |
| Rumen | stover | Negative | formation of cells                     | 5.47E-10 | 260  |
|       | Corn   |          |                                        |          |      |
| Rumen | stover | Negative | Movement Disorders                     | 5.47E-10 | 277  |
|       | Corn   |          |                                        |          |      |
| Rumen | stover | Negative | cell death of connective tissue cells  | 7.99E-10 | 171  |
|       | Corn   |          |                                        |          |      |
| Rumen | stover | Negative | abdominal neoplasm                     | 9.52E-10 | 1824 |
|       | Corn   |          |                                        |          |      |
| Rumen | stover | Negative | abnormal morphology of body cavity     | 1.05E-09 | 294  |
|       | Corn   |          |                                        |          |      |
| Rumen | stover | Negative | migration of tumor cell lines          | 1.12E-09 | 195  |
|       | Corn   |          |                                        |          |      |
| Rumen | stover | Negative | ubiquitination                         | 1.12E-09 | 105  |
|       | Corn   |          |                                        |          |      |
| Rumen | stover | Negative | morphology of heart                    | 1.37E-09 | 122  |
|       | Corn   |          |                                        |          |      |
| Rumen | stover | Negative | ubiquitination of protein              | 1.99E-09 | 103  |
|       | Corn   |          |                                        |          |      |
| Rumen | stover | Negative | invasion of tumor cell lines           | 2.32E-09 | 184  |
|       | Corn   |          |                                        |          |      |
| Rumen | stover | Negative | cell transformation                    | 4.32E-09 | 134  |
|       | Corn   |          |                                        |          |      |
| Rumen | stover | Negative | transactivation                        | 5.34E-09 | 162  |
|       | Corn   |          |                                        |          |      |
| Rumen | stover | Negative | colony formation                       | 5.42E-09 | 152  |
| Rumen | Corn   | Negative | digestive organ tumor                  | 6.60E-09 | 1584 |

|       |        |          |                                        |          |      |
|-------|--------|----------|----------------------------------------|----------|------|
|       | stover |          |                                        |          |      |
|       | Corn   |          |                                        |          |      |
| Rumen | stover | Negative | proliferation of fibroblast cell lines | 7.97E-09 | 124  |
|       | Corn   |          |                                        |          |      |
| Rumen | stover | Negative | abdominal cancer                       | 9.57E-09 | 1796 |
|       | Corn   |          |                                        |          |      |
| Rumen | stover | Negative | formation of cellular protrusions      | 9.57E-09 | 236  |
|       | Corn   |          |                                        |          |      |
| Rumen | stover | Negative | organization of organelle              | 1.53E-08 | 151  |
|       | Corn   |          |                                        |          |      |
| Rumen | stover | Negative | transactivation of RNA                 | 1.53E-08 | 152  |
|       | Corn   |          |                                        |          |      |
| Rumen | stover | Negative | size of body                           | 1.83E-08 | 223  |
|       | Corn   |          |                                        |          |      |
| Rumen | stover | Negative | digestive system cancer                | 1.97E-08 | 1566 |
|       | Corn   |          |                                        |          |      |
| Rumen | stover | Negative | development of cytoplasm               | 1.97E-08 | 132  |
|       | Corn   |          |                                        |          |      |
| Rumen | stover | Negative | colony formation of cells              | 2.22E-08 | 139  |
|       | Corn   |          |                                        |          |      |
| Rumen | stover | Negative | development of connective tissue       | 3.49E-08 | 109  |
|       | Corn   |          |                                        |          |      |
| Rumen | stover | Negative | morphology of vessel                   | 3.81E-08 | 93   |
|       | Corn   |          |                                        |          |      |
| Rumen | stover | Negative | quantity of mononuclear leukocytes     | 4.17E-08 | 195  |
|       | Corn   |          |                                        |          |      |
| Rumen | stover | Negative | protein kinase cascade                 | 4.17E-08 | 121  |
|       | Corn   |          |                                        |          |      |
| Rumen | stover | Negative | disorder of basal ganglia              | 4.60E-08 | 202  |
|       | Corn   |          |                                        |          |      |
| Rumen | stover | Negative | growth of epithelial tissue            | 4.64E-08 | 182  |
|       | Corn   |          |                                        |          |      |
| Rumen | stover | Negative | proliferation of blood cells           | 4.87E-08 | 219  |
|       | Corn   |          |                                        |          |      |
| Rumen | stover | Negative | neuromuscular disease                  | 5.15E-08 | 228  |
|       | Corn   |          |                                        |          |      |
| Rumen | stover | Negative | quantity of lymphocytes                | 5.33E-08 | 188  |
|       | Corn   |          |                                        |          |      |
| Rumen | stover | Negative | abnormal morphology of heart           | 6.66E-08 | 111  |
|       | Corn   |          |                                        |          |      |
| Rumen | stover | Negative | differentiation of epithelial tissue   | 7.50E-08 | 105  |
|       | Corn   |          |                                        |          |      |
| Rumen | stover | Negative | activation of DNA endogenous promoter  | 7.70E-08 | 299  |
| Rumen | Corn   | Negative | formation of cytoskeleton              | 7.70E-08 | 109  |

|       |        |          |                                            |          |     |
|-------|--------|----------|--------------------------------------------|----------|-----|
|       | stover |          |                                            |          |     |
|       | Corn   |          |                                            |          |     |
| Rumen | stover | Negative | proliferation of fibroblasts               | 9.87E-08 | 103 |
|       | Corn   |          |                                            |          |     |
| Rumen | stover | Negative | proliferation of immune cells              | 1.03E-07 | 206 |
|       | Corn   |          |                                            |          |     |
| Rumen | stover | Negative | apoptosis of heart cells                   | 1.05E-07 | 62  |
|       | Corn   |          |                                            |          |     |
| Rumen | stover | Negative | proliferation of neuronal cells            | 1.19E-07 | 156 |
|       | Corn   |          |                                            |          |     |
| Rumen | stover | Negative | development of body trunk                  | 1.50E-07 | 277 |
|       | Corn   |          |                                            |          |     |
| Rumen | stover | Negative | morphology of reproductive system          | 1.50E-07 | 146 |
|       | Corn   |          |                                            |          |     |
| Rumen | stover | Negative | abnormal morphology of abdomen             | 1.67E-07 | 224 |
|       | Corn   |          |                                            |          |     |
| Rumen | stover | Negative | abnormal morphology of epithelial tissue   | 1.77E-07 | 118 |
|       | Corn   |          |                                            |          |     |
| Rumen | stover | Negative | cell movement of endothelial cells         | 2.22E-07 | 102 |
|       | Corn   |          |                                            |          |     |
| Rumen | stover | Negative | abnormal morphology of reproductive system | 2.44E-07 | 139 |
|       | Corn   |          |                                            |          |     |
| Rumen | stover | Negative | growth of organism                         | 2.55E-07 | 214 |
|       | Corn   |          |                                            |          |     |
| Rumen | stover | Negative | dyskinesia                                 | 2.67E-07 | 164 |
|       | Corn   |          |                                            |          |     |
| Rumen | stover | Negative | cell cycle progression                     | 3.26E-07 | 260 |
|       | Corn   |          |                                            |          |     |
| Rumen | stover | Negative | morphology of blood vessel                 | 3.40E-07 | 84  |
|       | Corn   |          |                                            |          |     |
| Rumen | stover | Negative | cell death of fibroblast cell lines        | 3.44E-07 | 119 |
|       | Corn   |          |                                            |          |     |
| Rumen | stover | Negative | Viral Infection                            | 3.74E-07 | 380 |
|       | Corn   |          |                                            |          |     |
| Rumen | stover | Negative | apoptosis of fibroblast cell lines         | 3.74E-07 | 95  |
|       | Corn   |          |                                            |          |     |
| Rumen | stover | Negative | migration of endothelial cells             | 3.74E-07 | 95  |
|       | Corn   |          |                                            |          |     |
| Rumen | stover | Negative | fibrogenesis                               | 3.88E-07 | 115 |
|       | Corn   |          |                                            |          |     |
| Rumen | stover | Negative | neurological signs                         | 4.18E-07 | 171 |
|       | Corn   |          |                                            |          |     |
| Rumen | stover | Negative | long-term potentiation                     | 4.44E-07 | 74  |
| Rumen | Corn   | Negative | differentiation of epithelial cells        | 5.06E-07 | 91  |

|       |        |          |                                         |          |     |
|-------|--------|----------|-----------------------------------------|----------|-----|
|       | stover |          |                                         |          |     |
|       | Corn   |          |                                         |          |     |
| Rumen | stover | Negative | apoptosis of cardiomyocytes             | 5.41E-07 | 59  |
|       | Corn   |          |                                         |          |     |
| Rumen | stover | Negative | neonatal death                          | 5.75E-07 | 121 |
|       | Corn   |          |                                         |          |     |
| Rumen | stover | Negative | growth of muscle tissue                 | 6.76E-07 | 105 |
|       | Corn   |          |                                         |          |     |
| Rumen | stover | Negative | Edema                                   | 6.81E-07 | 98  |
|       | Corn   |          |                                         |          |     |
| Rumen | stover | Negative | phosphorylation of protein              | 7.21E-07 | 189 |
|       | Corn   |          |                                         |          |     |
| Rumen | stover | Negative | growth of plasma membrane projections   | 7.21E-07 | 127 |
|       | Corn   |          |                                         |          |     |
| Rumen | stover | Negative | proliferation of lymphocytes            | 7.51E-07 | 187 |
|       | Corn   |          |                                         |          |     |
| Rumen | stover | Negative | migration of vascular endothelial cells | 7.78E-07 | 54  |
|       | Corn   |          |                                         |          |     |
| Rumen | stover | Negative | morphology of cardiac muscle            | 7.78E-07 | 54  |
|       | Corn   |          |                                         |          |     |
| Rumen | stover | Negative | formation of skin                       | 8.70E-07 | 103 |
|       | Corn   |          |                                         |          |     |
| Rumen | stover | Negative | proliferation of muscle cells           | 8.87E-07 | 104 |
|       | Corn   |          |                                         |          |     |
| Rumen | stover | Negative | proliferation of mononuclear leukocytes | 9.46E-07 | 189 |
|       | Corn   |          |                                         |          |     |
| Rumen | stover | Negative | cell death of heart cells               | 1.11E-06 | 67  |
|       | Corn   |          |                                         |          |     |
| Rumen | stover | Negative | formation of filaments                  | 1.11E-06 | 110 |
|       | Corn   |          |                                         |          |     |
| Rumen | stover | Negative | seizure disorder                        | 1.14E-06 | 127 |
|       | Corn   |          |                                         |          |     |
| Rumen | stover | Negative | interphase                              | 1.15E-06 | 170 |
|       | Corn   |          |                                         |          |     |
| Rumen | stover | Negative | morphology of muscle                    | 1.19E-06 | 95  |
|       | Corn   |          |                                         |          |     |
| Rumen | stover | Negative | development of lymphatic system         | 1.22E-06 | 100 |
|       | Corn   |          |                                         |          |     |
| Rumen | stover | Negative | growth of neurites                      | 1.22E-06 | 125 |
|       | Corn   |          |                                         |          |     |
| Rumen | stover | Negative | apoptosis of muscle                     | 1.27E-06 | 77  |
|       | Corn   |          |                                         |          |     |
| Rumen | stover | Negative | accumulation of lipid                   | 1.28E-06 | 86  |
| Rumen | Corn   | Negative | development of cardiovascular tissue    | 1.28E-06 | 103 |

|       |        |          |                                          |          |     |
|-------|--------|----------|------------------------------------------|----------|-----|
|       | stover |          |                                          |          |     |
|       | Corn   |          |                                          |          |     |
| Rumen | stover | Negative | fatty acid metabolism                    | 1.28E-06 | 157 |
|       | Corn   |          |                                          |          |     |
| Rumen | stover | Negative | morphology of respiratory system         | 1.28E-06 | 89  |
|       | Corn   |          |                                          |          |     |
| Rumen | stover | Negative | Huntington's Disease                     | 1.28E-06 | 151 |
|       | Corn   |          |                                          |          |     |
| Rumen | stover | Negative | growth of tumor                          | 1.42E-06 | 201 |
|       | Corn   |          |                                          |          |     |
| Rumen | stover | Negative | organization of actin cytoskeleton       | 1.87E-06 | 86  |
|       | Corn   |          |                                          |          |     |
| Rumen | stover | Negative | apoptosis of muscle cells                | 2.03E-06 | 76  |
|       | Corn   |          |                                          |          |     |
| Rumen | stover | Negative | quantity of T lymphocytes                | 2.09E-06 | 141 |
|       | Corn   |          |                                          |          |     |
| Rumen | stover | Negative | quantity of lymphatic system component   | 2.26E-06 | 104 |
|       | Corn   |          |                                          |          |     |
| Rumen | stover | Negative | homing of cells                          | 2.32E-06 | 146 |
|       | Corn   |          |                                          |          |     |
| Rumen | stover | Negative | abnormal morphology of blood vessel      | 2.46E-06 | 77  |
|       | Corn   |          |                                          |          |     |
| Rumen | stover | Negative | neuronal cell death                      | 2.52E-06 | 174 |
|       | Corn   |          |                                          |          |     |
| Rumen | stover | Negative | uptake of carbohydrate                   | 2.63E-06 | 83  |
|       | Corn   |          |                                          |          |     |
| Rumen | stover | Negative | morphology of head                       | 2.93E-06 | 217 |
|       | Corn   |          |                                          |          |     |
| Rumen | stover | Negative | proliferation of epidermal cells         | 3.24E-06 | 53  |
|       | Corn   |          |                                          |          |     |
| Rumen | stover | Negative | cell death of blood cells                | 3.49E-06 | 176 |
|       | Corn   |          |                                          |          |     |
| Rumen | stover | Negative | movement of vascular endothelial cells   | 3.59E-06 | 56  |
|       | Corn   |          |                                          |          |     |
| Rumen | stover | Negative | cell movement of connective tissue cells | 3.72E-06 | 66  |
|       | Corn   |          |                                          |          |     |
| Rumen | stover | Negative | cell spreading                           | 4.07E-06 | 79  |
|       | Corn   |          |                                          |          |     |
| Rumen | stover | Negative | morphology of genital organ              | 4.07E-06 | 114 |
|       | Corn   |          |                                          |          |     |
| Rumen | stover | Negative | proliferation of smooth muscle cells     | 4.44E-06 | 81  |
|       | Corn   |          |                                          |          |     |
| Rumen | stover | Negative | function of cardiovascular system        | 4.44E-06 | 101 |
| Rumen | Corn   | Negative | morphogenesis of neurons                 | 4.44E-06 | 114 |

|       |        |          |                                           |          |     |
|-------|--------|----------|-------------------------------------------|----------|-----|
|       | stover |          |                                           |          |     |
|       | Corn   |          |                                           |          |     |
| Rumen | stover | Negative | uptake of monosaccharide                  | 4.64E-06 | 77  |
|       | Corn   |          |                                           |          |     |
| Rumen | stover | Negative | abnormal morphology of respiratory system | 4.77E-06 | 86  |
|       | Corn   |          |                                           |          |     |
| Rumen | stover | Negative | development of endothelial tissue         | 4.79E-06 | 100 |
|       | Corn   |          |                                           |          |     |
| Rumen | stover | Negative | migration of blood cells                  | 5.03E-06 | 215 |
|       | Corn   |          |                                           |          |     |
| Rumen | stover | Negative | endothelial cell development              | 5.03E-06 | 97  |
|       | Corn   |          |                                           |          |     |
| Rumen | stover | Negative | morphology of connective tissue           | 5.16E-06 | 122 |
|       | Corn   |          |                                           |          |     |
| Rumen | stover | Negative | abnormal morphology of head               | 5.16E-06 | 206 |
|       | Corn   |          |                                           |          |     |
| Rumen | stover | Negative | epilepsy                                  | 5.19E-06 | 86  |
|       | Corn   |          |                                           |          |     |
| Rumen | stover | Negative | quantity of lymphoid organ                | 5.19E-06 | 86  |
|       | Corn   |          |                                           |          |     |
| Rumen | stover | Negative | homing                                    | 5.19E-06 | 148 |
|       | Corn   |          |                                           |          |     |
| Rumen | stover | Negative | morphogenesis of neurites                 | 5.67E-06 | 112 |
|       | Corn   |          |                                           |          |     |
| Rumen | stover | Negative | formation of actin filaments              | 6.36E-06 | 85  |
|       | Corn   |          |                                           |          |     |
| Rumen | stover | Negative | differentiation of epidermal cells        | 6.40E-06 | 51  |
|       | Corn   |          |                                           |          |     |
| Rumen | stover | Negative | leukocyte migration                       | 6.48E-06 | 214 |
|       | Corn   |          |                                           |          |     |
| Rumen | stover | Negative | development of lymphatic system component | 6.48E-06 | 86  |
|       | Corn   |          |                                           |          |     |
| Rumen | stover | Negative | differentiation of skin                   | 6.71E-06 | 55  |
|       | Corn   |          |                                           |          |     |
| Rumen | stover | Negative | outgrowth of plasma membrane projections  | 6.71E-06 | 109 |
|       | Corn   |          |                                           |          |     |
| Rumen | stover | Negative | growth of skin                            | 6.93E-06 | 64  |
|       | Corn   |          |                                           |          |     |
| Rumen | stover | Negative | sprouting                                 | 7.18E-06 | 104 |
|       | Corn   |          |                                           |          |     |
| Rumen | stover | Negative | morphology of skin                        | 7.22E-06 | 77  |
|       | Corn   |          |                                           |          |     |
| Rumen | stover | Negative | cell death of cardiomyocytes              | 7.22E-06 | 63  |
| Rumen | Corn   | Negative | outgrowth of neurons                      | 7.22E-06 | 109 |

|       |                |          |                                      |          |     |
|-------|----------------|----------|--------------------------------------|----------|-----|
|       | stover<br>Corn |          |                                      |          |     |
| Rumen | stover<br>Corn | Negative | outgrowth of cells                   | 7.22E-06 | 115 |
| Rumen | stover<br>Corn | Negative | morphology of muscle cells           | 7.27E-06 | 51  |
| Rumen | stover<br>Corn | Negative | development of blood cells           | 7.35E-06 | 165 |
| Rumen | stover<br>Corn | Negative | growth of embryo                     | 7.36E-06 | 125 |
| Rumen | stover<br>Corn | Negative | development of genitourinary system  | 7.59E-06 | 217 |
| Rumen | stover<br>Corn | Negative | outgrowth of neurites                | 7.75E-06 | 108 |
| Rumen | stover<br>Corn | Negative | abnormal morphology of genital organ | 7.75E-06 | 109 |
| Rumen | stover<br>Corn | Negative | development of epithelial tissue     | 7.75E-06 | 134 |
| Rumen | stover<br>Corn | Negative | morphology of nervous system         | 7.81E-06 | 194 |
| Rumen | stover<br>Corn | Negative | concentration of lipid               | 7.84E-06 | 200 |
| Rumen | stover<br>Corn | Negative | dysgenesis                           | 8.41E-06 | 139 |
| Rumen | stover<br>Corn | Negative | S phase                              | 8.57E-06 | 74  |
| Rumen | stover<br>Corn | Negative | cell death of immune cells           | 9.31E-06 | 166 |
| Rumen | stover<br>Corn | Negative | development of leukocytes            | 9.31E-06 | 150 |
| Rumen | stover<br>Corn | Negative | morphology of digestive system       | 9.31E-06 | 146 |
| Rumen | stover<br>Corn | Negative | chemotaxis of cells                  | 9.45E-06 | 136 |
| Rumen | stover<br>Corn | Negative | cell movement of fibroblasts         | 1.01E-05 | 55  |
| Rumen | stover<br>Corn | Negative | Growth Failure                       | 1.03E-05 | 152 |
| Rumen | stover<br>Corn | Negative | differentiation of keratinocytes     | 1.05E-05 | 47  |
| Rumen | stover<br>Corn | Negative | quantity of thymus gland             | 1.07E-05 | 67  |
| Rumen | stover<br>Corn | Negative | cell spreading of kidney cell lines  | 1.09E-05 | 14  |
| Rumen | stover<br>Corn | Negative | T cell development                   | 1.11E-05 | 130 |



|       |        |          |                                          |          |     |
|-------|--------|----------|------------------------------------------|----------|-----|
|       | stover |          |                                          |          |     |
|       | Corn   |          |                                          |          |     |
| Rumen | stover | Negative | quantity of metal                        | 1.12E-05 | 129 |
|       | Corn   |          |                                          |          |     |
| Rumen | stover | Negative | differentiation of connective tissue     | 1.20E-05 | 181 |
|       | Corn   |          |                                          |          |     |
| Rumen | stover | Negative | neuritogenesis                           | 1.29E-05 | 148 |
|       | Corn   |          |                                          |          |     |
| Rumen | stover | Negative | migration of connective tissue cells     | 1.44E-05 | 54  |
|       | Corn   |          |                                          |          |     |
| Rumen | stover | Negative | quantity of thymocytes                   | 1.50E-05 | 66  |
|       | Corn   |          |                                          |          |     |
| Rumen | stover | Negative | differentiation of muscle                | 1.51E-05 | 83  |
|       | Corn   |          |                                          |          |     |
| Rumen | stover | Negative | chemotaxis                               | 1.55E-05 | 139 |
|       | Corn   |          |                                          |          |     |
| Rumen | stover | Negative | apoptosis of leukocyte cell lines        | 1.76E-05 | 53  |
|       | Corn   |          |                                          |          |     |
| Rumen | stover | Negative | synthesis of fatty acid                  | 1.78E-05 | 85  |
|       | Corn   |          |                                          |          |     |
| Rumen | stover | Negative | proliferation of T lymphocytes           | 1.85E-05 | 152 |
|       | Corn   |          |                                          |          |     |
| Rumen | stover | Negative | T cell homeostasis                       | 1.91E-05 | 132 |
|       | Corn   |          |                                          |          |     |
| Rumen | stover | Negative | hyperplasia of tissue                    | 1.96E-05 | 57  |
|       | Corn   |          |                                          |          |     |
| Rumen | stover | Negative | cell movement of leukocytes              | 1.99E-05 | 188 |
|       | Corn   |          |                                          |          |     |
| Rumen | stover | Negative | apoptosis of carcinoma cell lines        | 2.02E-05 | 69  |
|       | Corn   |          |                                          |          |     |
| Rumen | stover | Negative | formation of plasma membrane projections | 2.07E-05 | 150 |
|       | Corn   |          |                                          |          |     |
| Rumen | stover | Negative | potentiation of synapse                  | 2.15E-05 | 46  |
|       | Corn   |          |                                          |          |     |
| Rumen | stover | Negative | formation of lymphatic system component  | 2.16E-05 | 80  |
|       | Corn   |          |                                          |          |     |
| Rumen | stover | Negative | abnormal morphology of digestive system  | 2.31E-05 | 138 |
|       | Corn   |          |                                          |          |     |
| Rumen | stover | Negative | necrosis of epithelial tissue            | 2.31E-05 | 148 |
|       | Corn   |          |                                          |          |     |
| Rumen | stover | Negative | Hypoplasia                               | 2.31E-05 | 129 |
|       | Corn   |          |                                          |          |     |
| Rumen | stover | Negative | synthesis of lipid                       | 2.32E-05 | 176 |
| Rumen | Corn   | Negative | cell movement of myeloid cells           | 2.32E-05 | 137 |

|       |        |          |                                              |          |     |
|-------|--------|----------|----------------------------------------------|----------|-----|
|       | stover |          |                                              |          |     |
|       | Corn   |          |                                              |          |     |
| Rumen | stover | Negative | uptake of D-glucose                          | 2.32E-05 | 63  |
|       | Corn   |          |                                              |          |     |
| Rumen | stover | Negative | neoplasia of cells                           | 2.32E-05 | 115 |
|       | Corn   |          |                                              |          |     |
| Rumen | stover | Negative | metastasis                                   | 2.32E-05 | 186 |
|       | Corn   |          |                                              |          |     |
| Rumen | stover | Negative | cell movement of phagocytes                  | 2.37E-05 | 139 |
|       | Corn   |          |                                              |          |     |
| Rumen | stover | Negative | development of reproductive system           | 2.37E-05 | 181 |
|       | Corn   |          |                                              |          |     |
| Rumen | stover | Negative | Lymphocyte homeostasis                       | 2.41E-05 | 138 |
|       | Corn   |          |                                              |          |     |
| Rumen | stover | Negative | quantity of connective tissue                | 2.41E-05 | 151 |
|       | Corn   |          |                                              |          |     |
| Rumen | stover | Negative | abnormal morphology of interalveolar septa   | 2.51E-05 | 18  |
|       | Corn   |          |                                              |          |     |
| Rumen | stover | Negative | proliferation of epithelial cells            | 2.54E-05 | 126 |
|       | Corn   |          |                                              |          |     |
| Rumen | stover | Negative | cell death of T lymphocytes                  | 2.58E-05 | 85  |
|       | Corn   |          |                                              |          |     |
| Rumen | stover | Negative | homeostasis of leukocytes                    | 2.66E-05 | 140 |
|       | Corn   |          |                                              |          |     |
| Rumen | stover | Negative | function of leukocytes                       | 2.67E-05 | 136 |
|       | Corn   |          |                                              |          |     |
| Rumen | stover | Negative | cell death of carcinoma cell lines           | 2.72E-05 | 78  |
|       | Corn   |          |                                              |          |     |
| Rumen | stover | Negative | function of blood cells                      | 2.82E-05 | 147 |
|       | Corn   |          |                                              |          |     |
| Rumen | stover | Negative | abnormal morphology of internal genitalia    | 2.82E-05 | 93  |
|       | Corn   |          |                                              |          |     |
| Rumen | stover | Negative | cell death of fibroblasts                    | 2.88E-05 | 73  |
|       | Corn   |          |                                              |          |     |
| Rumen | stover | Negative | formation of lymphoid organ                  | 2.88E-05 | 73  |
|       | Corn   |          |                                              |          |     |
| Rumen | stover | Negative | differentiation of muscle cells              | 2.93E-05 | 77  |
|       | Corn   |          |                                              |          |     |
| Rumen | stover | Negative | cell viability of carcinoma cell lines       | 2.95E-05 | 44  |
|       | Corn   |          |                                              |          |     |
| Rumen | stover | Negative | apoptosis of B-lymphocyte derived cell lines | 2.96E-05 | 39  |
|       | Corn   |          |                                              |          |     |
| Rumen | stover | Negative | transport of carbohydrate                    | 3.46E-05 | 56  |
| Rumen | Corn   | Negative | long-term potentiation of synapse            | 3.46E-05 | 45  |

|       |        |          |                                            |          |     |
|-------|--------|----------|--------------------------------------------|----------|-----|
|       | stover |          |                                            |          |     |
|       | Corn   |          |                                            |          |     |
| Rumen | stover | Negative | cell death of leukocyte cell lines         | 3.49E-05 | 58  |
|       | Corn   |          |                                            |          |     |
| Rumen | stover | Negative | development of body axis                   | 3.49E-05 | 248 |
|       | Corn   |          |                                            |          |     |
| Rumen | stover | Negative | development of mononuclear leukocytes      | 3.49E-05 | 140 |
|       | Corn   |          |                                            |          |     |
| Rumen | stover | Negative | differentiation of connective tissue cells | 3.55E-05 | 159 |
|       | Corn   |          |                                            |          |     |
| Rumen | stover | Negative | development of lymphocytes                 | 3.55E-05 | 139 |
|       | Corn   |          |                                            |          |     |
| Rumen | stover | Negative | metabolism of protein                      | 3.62E-05 | 231 |
|       | Corn   |          |                                            |          |     |
| Rumen | stover | Negative | proliferation of keratinocytes             | 3.95E-05 | 46  |
|       | Corn   |          |                                            |          |     |
| Rumen | stover | Negative | survival of organism                       | 4.13E-05 | 172 |
|       | Corn   |          |                                            |          |     |
| Rumen | stover | Negative | formation of filopodia                     | 4.17E-05 | 49  |
|       | Corn   |          |                                            |          |     |
| Rumen | stover | Negative | generation of lymphocytes                  | 4.22E-05 | 43  |
|       | Corn   |          |                                            |          |     |
| Rumen | stover | Negative | proliferation of hematopoietic cells       | 4.60E-05 | 70  |
|       | Corn   |          |                                            |          |     |
| Rumen | stover | Negative | morphology of bone                         | 4.73E-05 | 115 |
|       | Corn   |          |                                            |          |     |
| Rumen | stover | Negative | stress response of cells                   | 5.17E-05 | 42  |
|       | Corn   |          |                                            |          |     |
| Rumen | stover | Negative | G1/S phase transition                      | 5.26E-05 | 60  |
|       | Corn   |          |                                            |          |     |
| Rumen | stover | Negative | cell death of dermal cells                 | 5.26E-05 | 32  |
|       | Corn   |          |                                            |          |     |
| Rumen | stover | Negative | hypersensitive reaction                    | 5.47E-05 | 110 |
|       | Corn   |          |                                            |          |     |
| Rumen | stover | Negative | apoptosis of dermal cells                  | 5.69E-05 | 30  |
|       | Corn   |          |                                            |          |     |
| Rumen | stover | Negative | epileptic seizure                          | 5.69E-05 | 49  |
|       | Corn   |          |                                            |          |     |
| Rumen | stover | Negative | quantity of metal ion                      | 5.70E-05 | 113 |
|       | Corn   |          |                                            |          |     |
| Rumen | stover | Negative | seizures                                   | 5.78E-05 | 103 |
|       | Corn   |          |                                            |          |     |
| Rumen | stover | Negative | Dermatitis                                 | 5.81E-05 | 111 |
| Rumen | Corn   | Negative | mitosis                                    | 5.91E-05 | 125 |

|       |        |          |                                       |          |     |
|-------|--------|----------|---------------------------------------|----------|-----|
|       | stover |          |                                       |          |     |
|       | Corn   |          |                                       |          |     |
| Rumen | stover | Negative | apoptosis of skin                     | 6.09E-05 | 31  |
|       | Corn   |          |                                       |          |     |
| Rumen | stover | Negative | transport of carboxylic acid          | 6.18E-05 | 37  |
|       | Corn   |          |                                       |          |     |
| Rumen | stover | Negative | degeneration of nervous system        | 6.18E-05 | 77  |
|       | Corn   |          |                                       |          |     |
| Rumen | stover | Negative | formation of actin stress fibers      | 6.18E-05 | 66  |
|       | Corn   |          |                                       |          |     |
| Rumen | stover | Negative | formation of osteoclasts              | 6.18E-05 | 38  |
|       | Corn   |          |                                       |          |     |
| Rumen | stover | Negative | morphology of gonad                   | 6.37E-05 | 98  |
|       | Corn   |          |                                       |          |     |
| Rumen | stover | Negative | advanced malignant tumor              | 6.37E-05 | 202 |
|       | Corn   |          |                                       |          |     |
| Rumen | stover | Negative | branching of cells                    | 6.39E-05 | 96  |
|       | Corn   |          |                                       |          |     |
| Rumen | stover | Negative | replication of RNA virus              | 6.49E-05 | 127 |
|       | Corn   |          |                                       |          |     |
| Rumen | stover | Negative | development of head                   | 6.66E-05 | 231 |
|       | Corn   |          |                                       |          |     |
| Rumen | stover | Negative | synthesis of reactive oxygen species  | 6.72E-05 | 121 |
|       | Corn   |          |                                       |          |     |
| Rumen | stover | Negative | apoptosis of breast cancer cell lines | 6.73E-05 | 77  |
|       | Corn   |          |                                       |          |     |
| Rumen | stover | Negative | development of neurons                | 6.76E-05 | 188 |
|       | Corn   |          |                                       |          |     |
| Rumen | stover | Negative | cell death of muscle cells            | 6.87E-05 | 88  |
|       | Corn   |          |                                       |          |     |
| Rumen | stover | Negative | colony formation of tumor cell lines  | 6.98E-05 | 74  |
|       | Corn   |          |                                       |          |     |
| Rumen | stover | Negative | formation of connective tissue cells  | 6.98E-05 | 59  |
|       | Corn   |          |                                       |          |     |
| Rumen | stover | Negative | concentration of fatty acid           | 7.12E-05 | 75  |
|       | Corn   |          |                                       |          |     |
| Rumen | stover | Negative | formation of vesicles                 | 7.24E-05 | 37  |
|       | Corn   |          |                                       |          |     |
| Rumen | stover | Negative | shape change of kidney cell lines     | 7.34E-05 | 23  |
|       | Corn   |          |                                       |          |     |
| Rumen | stover | Negative | differentiation of blood cells        | 7.63E-05 | 201 |
|       | Corn   |          |                                       |          |     |
| Rumen | stover | Negative | quantity of epithelial tissue         | 7.64E-05 | 51  |
| Rumen | Corn   | Negative | generation of blood cells             | 7.66E-05 | 48  |

|       |        |          |                                                 |          |     |
|-------|--------|----------|-------------------------------------------------|----------|-----|
|       | stover |          |                                                 |          |     |
|       | Corn   |          |                                                 |          |     |
| Rumen | stover | Negative | cell death of melanoma cell lines               | 8.19E-05 | 68  |
|       | Corn   |          |                                                 |          |     |
| Rumen | stover | Negative | cancer of cells                                 | 8.45E-05 | 69  |
|       | Corn   |          |                                                 |          |     |
| Rumen | stover | Negative | apoptosis of blood cells                        | 8.45E-05 | 124 |
|       | Corn   |          |                                                 |          |     |
| Rumen | stover | Negative | cell death of hepatoma cell lines               | 8.46E-05 | 49  |
|       | Corn   |          |                                                 |          |     |
| Rumen | stover | Negative | cell death of cerebral cortex cells             | 8.47E-05 | 63  |
|       | Corn   |          |                                                 |          |     |
| Rumen | stover | Negative | cell death of pheochromocytoma cell lines       | 8.64E-05 | 37  |
|       | Corn   |          |                                                 |          |     |
| Rumen | stover | Negative | cell death of breast cancer cell lines          | 8.97E-05 | 87  |
|       | Corn   |          |                                                 |          |     |
| Rumen | stover | Negative | synthesis of prostaglandin                      | 9.27E-05 | 50  |
|       | Corn   |          |                                                 |          |     |
| Rumen | stover | Negative | congenital anomaly of musculoskeletal system    | 9.48E-05 | 177 |
|       | Corn   |          |                                                 |          |     |
| Rumen | stover | Negative | branching of neurites                           | 9.48E-05 | 74  |
|       | Corn   |          |                                                 |          |     |
| Rumen | stover | Negative | proliferation of hematopoietic progenitor cells | 9.49E-05 | 66  |
|       | Corn   |          |                                                 |          |     |
| Rumen | stover | Negative | differentiation of leukocytes                   | 9.56E-05 | 163 |
|       | Corn   |          |                                                 |          |     |
| Rumen | stover | Negative | abnormal morphology of muscle                   | 9.56E-05 | 83  |
|       | Corn   |          |                                                 |          |     |
| Rumen | stover | Negative | cell death of epithelial cells                  | 9.61E-05 | 124 |
|       | Corn   |          |                                                 |          |     |
| Rumen | stover | Negative | inflammation of organ                           | 9.61E-05 | 271 |
|       | Corn   |          |                                                 |          |     |
| Rumen | stover | Negative | abnormal morphology of gonad                    | 9.62E-05 | 94  |
|       | Corn   |          |                                                 |          |     |
| Rumen | stover | Negative | branching of neurons                            | 9.64E-05 | 76  |
|       | Corn   |          |                                                 |          |     |
| Rumen | stover | Negative | cell death of skin                              | 9.64E-05 | 33  |
|       | Corn   |          |                                                 |          |     |
| Rumen | stover | Negative | activation of Protein kinase                    | 9.95E-05 | 68  |
|       | Corn   |          |                                                 |          |     |
| Rumen | stover | Negative | cell death of epidermal cells                   | 1.04E-04 | 30  |
|       | Corn   |          |                                                 |          |     |
| Rumen | stover | Negative | abnormal morphology of skin                     | 1.05E-04 | 66  |
| Rumen | Corn   | Negative | development of connective tissue cells          | 1.09E-04 | 61  |

|       |        |          |                                           |          |     |
|-------|--------|----------|-------------------------------------------|----------|-----|
|       | stover |          |                                           |          |     |
|       | Corn   |          |                                           |          |     |
| Rumen | stover | Negative | apoptosis of connective tissue cells      | 1.10E-04 | 78  |
|       | Corn   |          |                                           |          |     |
| Rumen | stover | Negative | tumorigenesis of malignant tumor          | 1.10E-04 | 72  |
|       | Corn   |          |                                           |          |     |
| Rumen | stover | Negative | formation of leukocytes                   | 1.10E-04 | 46  |
|       | Corn   |          |                                           |          |     |
| Rumen | stover | Negative | replication of virus                      | 1.12E-04 | 138 |
|       | Corn   |          |                                           |          |     |
| Rumen | stover | Negative | apoptosis of hematopoietic cell lines     | 1.12E-04 | 57  |
|       | Corn   |          |                                           |          |     |
| Rumen | stover | Negative | organization of filaments                 | 1.12E-04 | 57  |
|       | Corn   |          |                                           |          |     |
| Rumen | stover | Negative | abnormal morphology of bone               | 1.12E-04 | 110 |
|       | Corn   |          |                                           |          |     |
| Rumen | stover | Negative | abnormal morphology of nervous system     | 1.13E-04 | 174 |
|       | Corn   |          |                                           |          |     |
| Rumen | stover | Negative | cognition                                 | 1.13E-04 | 114 |
|       | Corn   |          |                                           |          |     |
| Rumen | stover | Negative | cell death of muscle                      | 1.14E-04 | 89  |
|       | Corn   |          |                                           |          |     |
| Rumen | stover | Negative | activation of enzyme                      | 1.18E-04 | 99  |
|       | Corn   |          |                                           |          |     |
| Rumen | stover | Negative | cell death of neuroblastoma cell lines    | 1.20E-04 | 54  |
|       | Corn   |          |                                           |          |     |
| Rumen | stover | Negative | cell movement of antigen presenting cells | 1.24E-04 | 90  |
|       | Corn   |          |                                           |          |     |
| Rumen | stover | Negative | endocytosis                               | 1.24E-04 | 89  |
|       | Corn   |          |                                           |          |     |
| Rumen | stover | Negative | metabolism of reactive oxygen species     | 1.25E-04 | 124 |
|       | Corn   |          |                                           |          |     |
| Rumen | stover | Negative | quantity of cellular protrusions          | 1.25E-04 | 46  |
|       | Corn   |          |                                           |          |     |
| Rumen | stover | Negative | migration of fibroblasts                  | 1.26E-04 | 42  |
|       | Corn   |          |                                           |          |     |
| Rumen | stover | Negative | metabolism of prostaglandin               | 1.26E-04 | 51  |
|       | Corn   |          |                                           |          |     |
| Rumen | stover | Negative | G1 phase                                  | 1.27E-04 | 99  |
|       | Corn   |          |                                           |          |     |
| Rumen | stover | Negative | quantity of carbohydrate                  | 1.30E-04 | 128 |
|       | Corn   |          |                                           |          |     |
| Rumen | stover | Negative | quantity of B lymphocytes                 | 1.35E-04 | 89  |
| Rumen | Corn   | Negative | formation of mononuclear leukocytes       | 1.37E-04 | 39  |

|       |        |          |                                           |          |     |
|-------|--------|----------|-------------------------------------------|----------|-----|
|       | stover |          |                                           |          |     |
|       | Corn   |          |                                           |          |     |
| Rumen | stover | Negative | shape change of neurites                  | 1.38E-04 | 75  |
|       | Corn   |          |                                           |          |     |
| Rumen | stover | Negative | cell movement of breast cancer cell lines | 1.40E-04 | 76  |
|       | Corn   |          |                                           |          |     |
| Rumen | stover | Negative | apoptosis of neuroblastoma cell lines     | 1.40E-04 | 37  |
|       | Corn   |          |                                           |          |     |
| Rumen | stover | Negative | cell movement of epithelial cells         | 1.41E-04 | 43  |
|       | Corn   |          |                                           |          |     |
| Rumen | stover | Negative | behavior                                  | 1.49E-04 | 230 |
|       | Corn   |          |                                           |          |     |
| Rumen | stover | Negative | infection by Retroviridae                 | 1.49E-04 | 172 |
|       | Corn   |          |                                           |          |     |
| Rumen | stover | Negative | aggregation of cells                      | 1.63E-04 | 84  |
|       | Corn   |          |                                           |          |     |
| Rumen | stover | Negative | I-kappaB kinase/NF-kappaB cascade         | 1.63E-04 | 49  |
|       | Corn   |          |                                           |          |     |
| Rumen | stover | Negative | apoptosis of cervical cancer cell lines   | 1.67E-04 | 74  |
|       | Corn   |          |                                           |          |     |
| Rumen | stover | Negative | development of abdomen                    | 1.72E-04 | 141 |
|       | Corn   |          |                                           |          |     |
| Rumen | stover | Negative | apoptosis of epidermal cells              | 1.72E-04 | 28  |
|       | Corn   |          |                                           |          |     |
| Rumen | stover | Negative | binding of DNA                            | 1.72E-04 | 128 |
|       | Corn   |          |                                           |          |     |
| Rumen | stover | Negative | congenital malformation of skeleton       | 1.73E-04 | 106 |
|       | Corn   |          |                                           |          |     |
| Rumen | stover | Negative | transmigration of cells                   | 1.74E-04 | 45  |
|       | Corn   |          |                                           |          |     |
| Rumen | stover | Negative | size of animal                            | 1.74E-04 | 50  |
|       | Corn   |          |                                           |          |     |
| Rumen | stover | Negative | function of muscle                        | 1.74E-04 | 89  |
|       | Corn   |          |                                           |          |     |
| Rumen | stover | Negative | differentiation of tumor cell lines       | 1.80E-04 | 96  |
|       | Corn   |          |                                           |          |     |
| Rumen | stover | Negative | generation of leukocytes                  | 1.92E-04 | 46  |
|       | Corn   |          |                                           |          |     |
| Rumen | stover | Negative | Neurodegeneration                         | 1.92E-04 | 80  |
|       | Corn   |          |                                           |          |     |
| Rumen | stover | Negative | cell death of hematopoietic cell lines    | 1.95E-04 | 62  |
|       | Corn   |          |                                           |          |     |
| Rumen | stover | Negative | hypoplasia of organ                       | 1.99E-04 | 111 |
| Rumen | Corn   | Negative | accumulation of reactive oxygen species   | 1.99E-04 | 27  |

|       |        |          |                                             |          |     |
|-------|--------|----------|---------------------------------------------|----------|-----|
|       | stover |          |                                             |          |     |
|       | Corn   |          |                                             |          |     |
| Rumen | stover | Negative | congenital heart disease                    | 2.02E-04 | 57  |
|       | Corn   |          |                                             |          |     |
| Rumen | stover | Negative | cell death of keratinocytes                 | 2.13E-04 | 28  |
|       | Corn   |          |                                             |          |     |
| Rumen | stover | Negative | morphology of cardiovascular tissue         | 2.13E-04 | 28  |
|       | Corn   |          |                                             |          |     |
| Rumen | stover | Negative | transport of cation                         | 2.17E-04 | 101 |
|       | Corn   |          |                                             |          |     |
| Rumen | stover | Negative | development of hematopoietic system         | 2.17E-04 | 66  |
|       | Corn   |          |                                             |          |     |
| Rumen | stover | Negative | generation of reactive oxygen species       | 2.17E-04 | 56  |
|       | Corn   |          |                                             |          |     |
| Rumen | stover | Negative | dendritic growth/branching                  | 2.19E-04 | 59  |
|       | Corn   |          |                                             |          |     |
| Rumen | stover | Negative | maturation of cells                         | 2.20E-04 | 113 |
|       | Corn   |          |                                             |          |     |
| Rumen | stover | Negative | secretory pathway                           | 2.21E-04 | 54  |
|       | Corn   |          |                                             |          |     |
| Rumen | stover | Negative | apoptosis of pheochromocytoma cell lines    | 2.21E-04 | 29  |
|       | Corn   |          |                                             |          |     |
| Rumen | stover | Negative | autosomal dominant disease                  | 2.22E-04 | 153 |
|       | Corn   |          |                                             |          |     |
| Rumen | stover | Negative | generation of cells                         | 2.28E-04 | 69  |
|       | Corn   |          |                                             |          |     |
| Rumen | stover | Negative | quantity of Ca <sup>2+</sup>                | 2.28E-04 | 102 |
|       | Corn   |          |                                             |          |     |
| Rumen | stover | Negative | transport of monosaccharide                 | 2.28E-04 | 45  |
|       | Corn   |          |                                             |          |     |
| Rumen | stover | Negative | quantity of macrophages                     | 2.30E-04 | 55  |
|       | Corn   |          |                                             |          |     |
| Rumen | stover | Negative | congenital anomaly of cardiovascular system | 2.31E-04 | 61  |
|       | Corn   |          |                                             |          |     |
| Rumen | stover | Negative | apoptosis of leukocytes                     | 2.34E-04 | 113 |
|       | Corn   |          |                                             |          |     |
| Rumen | stover | Negative | metastasis of cells                         | 2.36E-04 | 66  |
|       | Corn   |          |                                             |          |     |
| Rumen | stover | Negative | morphology of epidermis                     | 2.36E-04 | 41  |
|       | Corn   |          |                                             |          |     |
| Rumen | stover | Negative | synthesis of DNA                            | 2.36E-04 | 104 |
|       | Corn   |          |                                             |          |     |
| Rumen | stover | Negative | migration of stomach cancer cell lines      | 2.41E-04 | 12  |
| Rumen | Corn   | Negative | relaxation of muscle                        | 2.42E-04 | 27  |



|       |        |          |                                            |          |     |
|-------|--------|----------|--------------------------------------------|----------|-----|
|       | stover |          |                                            |          |     |
|       | Corn   |          |                                            |          |     |
| Rumen | stover | Negative | proliferation of endothelial cells         | 2.46E-04 | 80  |
|       | Corn   |          |                                            |          |     |
| Rumen | stover | Negative | apoptosis of epithelial cell lines         | 2.48E-04 | 60  |
|       | Corn   |          |                                            |          |     |
| Rumen | stover | Negative | function of smooth muscle                  | 2.69E-04 | 29  |
|       | Corn   |          |                                            |          |     |
| Rumen | stover | Negative | morphology of cardiomyocytes               | 2.69E-04 | 29  |
|       | Corn   |          |                                            |          |     |
| Rumen | stover | Negative | formation of lymphocytes                   | 2.69E-04 | 37  |
|       | Corn   |          |                                            |          |     |
| Rumen | stover | Negative | cardiogenesis                              | 2.70E-04 | 116 |
|       | Corn   |          |                                            |          |     |
| Rumen | stover | Negative | cell death of hematopoietic cells          | 2.71E-04 | 63  |
|       | Corn   |          |                                            |          |     |
| Rumen | stover | Negative | transport of inorganic cation              | 2.85E-04 | 89  |
|       | Corn   |          |                                            |          |     |
| Rumen | stover | Negative | development of digestive system            | 2.87E-04 | 96  |
|       | Corn   |          |                                            |          |     |
| Rumen | stover | Negative | inflammatory response                      | 2.87E-04 | 183 |
|       | Corn   |          |                                            |          |     |
| Rumen | stover | Negative | apoptosis of hepatoma cell lines           | 2.88E-04 | 43  |
|       | Corn   |          |                                            |          |     |
| Rumen | stover | Negative | abnormal morphology of endothelial tissue  | 2.97E-04 | 22  |
|       | Corn   |          |                                            |          |     |
| Rumen | stover | Negative | morphology of stratum corneum              | 3.04E-04 | 16  |
|       | Corn   |          |                                            |          |     |
| Rumen | stover | Negative | cell death of epithelial cell lines        | 3.18E-04 | 73  |
|       | Corn   |          |                                            |          |     |
| Rumen | stover | Negative | cell movement of stomach cancer cell lines | 3.26E-04 | 13  |
|       | Corn   |          |                                            |          |     |
| Rumen | stover | Negative | replication of Hepatitis C virus           | 3.29E-04 | 25  |
|       | Corn   |          |                                            |          |     |
| Rumen | stover | Negative | midline defect                             | 3.38E-04 | 69  |
|       | Corn   |          |                                            |          |     |
| Rumen | stover | Negative | biosynthesis of purine ribonucleotide      | 3.41E-04 | 31  |
|       | Corn   |          |                                            |          |     |
| Rumen | stover | Negative | necrosis of tumor                          | 3.41E-04 | 95  |
|       | Corn   |          |                                            |          |     |
| Rumen | stover | Negative | cell death of tumor cells                  | 3.50E-04 | 93  |
|       | Corn   |          |                                            |          |     |
| Rumen | stover | Negative | arrest in interphase                       | 3.50E-04 | 103 |
| Rumen | Corn   | Negative | apoptosis of keratinocytes                 | 3.52E-04 | 26  |

|       |        |          |                                               |          |     |
|-------|--------|----------|-----------------------------------------------|----------|-----|
|       | stover |          |                                               |          |     |
|       | Corn   |          |                                               |          |     |
| Rumen | stover | Negative | HIV infection                                 | 3.62E-04 | 168 |
|       | Corn   |          |                                               |          |     |
| Rumen | stover | Negative | cell death of lymphocytes                     | 3.62E-04 | 96  |
|       | Corn   |          |                                               |          |     |
| Rumen | stover | Negative | differentiation of lymphocytes                | 3.62E-04 | 121 |
|       | Corn   |          |                                               |          |     |
| Rumen | stover | Negative | apoptosis of fibroblasts                      | 3.63E-04 | 58  |
|       | Corn   |          |                                               |          |     |
| Rumen | stover | Negative | abnormal morphology of embryonic tissue       | 3.77E-04 | 132 |
|       | Corn   |          |                                               |          |     |
| Rumen | stover | Negative | metabolism of carbohydrate                    | 3.86E-04 | 148 |
|       | Corn   |          |                                               |          |     |
| Rumen | stover | Negative | mass of genitourinary system                  | 3.86E-04 | 76  |
|       | Corn   |          |                                               |          |     |
| Rumen | stover | Negative | morphology of lung                            | 3.87E-04 | 51  |
|       | Corn   |          |                                               |          |     |
| Rumen | stover | Negative | arrest in proliferation of cells              | 3.93E-04 | 57  |
|       | Corn   |          |                                               |          |     |
| Rumen | stover | Negative | generation of T lymphocytes                   | 3.98E-04 | 34  |
|       | Corn   |          |                                               |          |     |
| Rumen | stover | Negative | cell death of thymocytes                      | 4.02E-04 | 42  |
|       | Corn   |          |                                               |          |     |
| Rumen | stover | Negative | learning                                      | 4.02E-04 | 103 |
|       | Corn   |          |                                               |          |     |
| Rumen | stover | Negative | respiratory system development                | 4.02E-04 | 86  |
|       | Corn   |          |                                               |          |     |
| Rumen | stover | Negative | morphology of heart ventricle                 | 4.02E-04 | 52  |
|       | Corn   |          |                                               |          |     |
| Rumen | stover | Negative | chronic myeloid leukemia                      | 4.02E-04 | 32  |
|       | Corn   |          |                                               |          |     |
| Rumen | stover | Negative | import of cation                              | 4.02E-04 | 12  |
|       | Corn   |          |                                               |          |     |
| Rumen | stover | Negative | apoptosis of T lymphocytes                    | 4.12E-04 | 72  |
|       | Corn   |          |                                               |          |     |
| Rumen | stover | Negative | allergy                                       | 4.23E-04 | 100 |
|       | Corn   |          |                                               |          |     |
| Rumen | stover | Negative | oxidative stress response of cells            | 4.26E-04 | 21  |
|       | Corn   |          |                                               |          |     |
| Rumen | stover | Negative | chemotaxis of antigen presenting cells        | 4.33E-04 | 43  |
|       | Corn   |          |                                               |          |     |
| Rumen | stover | Negative | proliferation of vascular smooth muscle cells | 4.33E-04 | 43  |
| Rumen | Corn   | Negative | shape change of tumor cell lines              | 4.33E-04 | 43  |

|       |        |          |                                             |          |     |
|-------|--------|----------|---------------------------------------------|----------|-----|
|       | stover |          |                                             |          |     |
|       | Corn   |          |                                             |          |     |
| Rumen | stover | Negative | autosomal recessive disease                 | 4.57E-04 | 212 |
|       | Corn   |          |                                             |          |     |
| Rumen | stover | Negative | cell death of mononuclear leukocytes        | 4.73E-04 | 98  |
|       | Corn   |          |                                             |          |     |
| Rumen | stover | Negative | formation of blood cells                    | 4.74E-04 | 53  |
|       | Corn   |          |                                             |          |     |
| Rumen | stover | Negative | cell movement of granulocytes               | 4.79E-04 | 92  |
|       | Corn   |          |                                             |          |     |
| Rumen | stover | Negative | tyrosine phosphorylation of protein         | 4.89E-04 | 51  |
|       | Corn   |          |                                             |          |     |
| Rumen | stover | Negative | cell movement of muscle cells               | 5.01E-04 | 49  |
|       | Corn   |          |                                             |          |     |
| Rumen | stover | Negative | scattering of cells                         | 5.06E-04 | 25  |
|       | Corn   |          |                                             |          |     |
| Rumen | stover | Negative | secretion of molecule                       | 5.10E-04 | 132 |
|       | Corn   |          |                                             |          |     |
| Rumen | stover | Negative | infection by RNA virus                      | 5.27E-04 | 200 |
|       | Corn   |          |                                             |          |     |
| Rumen | stover | Negative | morphology of endothelial tissue            | 5.35E-04 | 26  |
|       | Corn   |          |                                             |          |     |
| Rumen | stover | Negative | morphology of lymphatic system component    | 5.50E-04 | 102 |
|       | Corn   |          |                                             |          |     |
| Rumen | stover | Negative | morphology of myocardium                    | 5.53E-04 | 34  |
|       | Corn   |          |                                             |          |     |
| Rumen | stover | Negative | ruffling                                    | 5.77E-04 | 32  |
|       | Corn   |          |                                             |          |     |
| Rumen | stover | Negative | cell death of central nervous system cells  | 6.06E-04 | 74  |
|       | Corn   |          |                                             |          |     |
| Rumen | stover | Negative | chemotaxis of myeloid cells                 | 6.06E-04 | 74  |
|       | Corn   |          |                                             |          |     |
| Rumen | stover | Negative | benign neoplasia                            | 6.08E-04 | 212 |
|       | Corn   |          |                                             |          |     |
| Rumen | stover | Negative | cell movement of prostate cancer cell lines | 6.12E-04 | 36  |
|       | Corn   |          |                                             |          |     |
| Rumen | stover | Negative | Thrombosis                                  | 6.19E-04 | 46  |
|       | Corn   |          |                                             |          |     |
| Rumen | stover | Negative | synthesis of prostaglandin E2               | 6.24E-04 | 39  |
|       | Corn   |          |                                             |          |     |
| Rumen | stover | Negative | differentiation of smooth muscle            | 6.27E-04 | 22  |
|       | Corn   |          |                                             |          |     |
| Rumen | stover | Negative | atrophy of muscle                           | 6.48E-04 | 41  |
| Rumen | Corn   | Negative | cell death of cervical cancer cell lines    | 6.52E-04 | 87  |

|       |        |          |                                              |          |     |
|-------|--------|----------|----------------------------------------------|----------|-----|
|       | stover |          |                                              |          |     |
|       | Corn   |          |                                              |          |     |
| Rumen | stover | Negative | morphology of mouth                          | 6.53E-04 | 38  |
|       | Corn   |          |                                              |          |     |
| Rumen | stover | Negative | migration of muscle cells                    | 6.60E-04 | 45  |
|       | Corn   |          |                                              |          |     |
| Rumen | stover | Negative | differentiation of mononuclear leukocytes    | 6.69E-04 | 129 |
|       | Corn   |          |                                              |          |     |
| Rumen | stover | Negative | dephosphorylation of protein                 | 6.69E-04 | 50  |
|       | Corn   |          |                                              |          |     |
| Rumen | stover | Negative | hypertrophy of heart                         | 6.71E-04 | 84  |
|       | Corn   |          |                                              |          |     |
| Rumen | stover | Negative | transport of D-glucose                       | 6.79E-04 | 40  |
|       | Corn   |          |                                              |          |     |
| Rumen | stover | Negative | reorganization of cytoskeleton               | 6.98E-04 | 51  |
|       | Corn   |          |                                              |          |     |
| Rumen | stover | Negative | progression of tumor                         | 7.01E-04 | 44  |
|       | Corn   |          |                                              |          |     |
| Rumen | stover | Negative | transformation of fibroblast cell lines      | 7.01E-04 | 66  |
|       | Corn   |          |                                              |          |     |
| Rumen | stover | Negative | development of gastrointestinal tract        | 7.05E-04 | 67  |
|       | Corn   |          |                                              |          |     |
| Rumen | stover | Negative | expansion of cells                           | 7.09E-04 | 76  |
|       | Corn   |          |                                              |          |     |
| Rumen | stover | Negative | metabolism of nucleoside triphosphate        | 7.12E-04 | 39  |
|       | Corn   |          |                                              |          |     |
| Rumen | stover | Negative | Hypertrophy                                  | 7.23E-04 | 114 |
|       | Corn   |          |                                              |          |     |
| Rumen | stover | Negative | hepatobiliary system cancer                  | 7.36E-04 | 904 |
|       | Corn   |          |                                              |          |     |
| Rumen | stover | Negative | differentiation of T lymphocytes             | 7.43E-04 | 93  |
|       | Corn   |          |                                              |          |     |
| Rumen | stover | Negative | size of embryo                               | 7.43E-04 | 88  |
|       | Corn   |          |                                              |          |     |
| Rumen | stover | Negative | angiogenesis of eye                          | 7.43E-04 | 18  |
|       | Corn   |          |                                              |          |     |
| Rumen | stover | Negative | senescence of cells                          | 7.43E-04 | 63  |
|       | Corn   |          |                                              |          |     |
| Rumen | stover | Negative | liver cancer                                 | 7.47E-04 | 900 |
|       | Corn   |          |                                              |          |     |
| Rumen | stover | Negative | morphology of pulmonary alveolus             | 7.52E-04 | 34  |
|       | Corn   |          |                                              |          |     |
| Rumen | stover | Negative | cell death of hematopoietic progenitor cells | 7.72E-04 | 59  |
| Rumen | Corn   | Negative | urination disorder                           | 7.72E-04 | 73  |

|       |        |          |                                       |          |     |
|-------|--------|----------|---------------------------------------|----------|-----|
|       | stover |          |                                       |          |     |
|       | Corn   |          |                                       |          |     |
| Rumen | stover | Negative | formation of vascular lesion          | 7.72E-04 | 33  |
|       | Corn   |          |                                       |          |     |
| Rumen | stover | Negative | synthesis of nitric oxide             | 7.72E-04 | 70  |
|       | Corn   |          |                                       |          |     |
| Rumen | stover | Negative | infection of cells                    | 7.81E-04 | 184 |
|       | Corn   |          |                                       |          |     |
| Rumen | stover | Negative | concentration of acylglycerol         | 7.83E-04 | 83  |
|       | Corn   |          |                                       |          |     |
| Rumen | stover | Negative | quantity of hematopoietic cells       | 7.90E-04 | 107 |
|       | Corn   |          |                                       |          |     |
| Rumen | stover | Negative | catabolism of protein                 | 8.03E-04 | 142 |
|       | Corn   |          |                                       |          |     |
| Rumen | stover | Negative | activation of cells                   | 8.09E-04 | 222 |
|       | Corn   |          |                                       |          |     |
| Rumen | stover | Negative | migration of breast cancer cell lines | 8.11E-04 | 63  |
|       | Corn   |          |                                       |          |     |
| Rumen | stover | Negative | mammary tumor                         | 8.14E-04 | 359 |
|       | Corn   |          |                                       |          |     |
| Rumen | stover | Negative | engulfment of cells                   | 8.14E-04 | 99  |
|       | Corn   |          |                                       |          |     |
| Rumen | stover | Negative | homeostasis of inorganic cation       | 8.24E-04 | 50  |
|       | Corn   |          |                                       |          |     |
| Rumen | stover | Negative | Organ Degeneration                    | 8.27E-04 | 118 |
|       | Corn   |          |                                       |          |     |
| Rumen | stover | Negative | chemotaxis of phagocytes              | 8.27E-04 | 74  |
|       | Corn   |          |                                       |          |     |
| Rumen | stover | Negative | export of molecule                    | 8.27E-04 | 74  |
|       | Corn   |          |                                       |          |     |
| Rumen | stover | Negative | liver tumor                           | 8.27E-04 | 905 |
|       | Corn   |          |                                       |          |     |
| Rumen | stover | Negative | G2 phase                              | 8.27E-04 | 68  |
|       | Corn   |          |                                       |          |     |
| Rumen | stover | Negative | repair of DNA                         | 8.27E-04 | 73  |
|       | Corn   |          |                                       |          |     |
| Rumen | stover | Negative | cell death of brain cells             | 8.28E-04 | 69  |
|       | Corn   |          |                                       |          |     |
| Rumen | stover | Negative | peripheral vascular disease           | 8.38E-04 | 93  |
|       | Corn   |          |                                       |          |     |
| Rumen | stover | Negative | tumorigenesis of epithelial neoplasm  | 8.40E-04 | 48  |
|       | Corn   |          |                                       |          |     |
| Rumen | stover | Negative | necrosis of liver                     | 8.61E-04 | 61  |
| Rumen | Corn   | Negative | progressive motor neuropathy          | 8.95E-04 | 124 |

|       |        |          |                                             |          |      |
|-------|--------|----------|---------------------------------------------|----------|------|
|       | stover |          |                                             |          |      |
|       | Corn   |          |                                             |          |      |
| Rumen | stover | Negative | cell death of brain                         | 9.04E-04 | 73   |
|       | Corn   |          |                                             |          |      |
| Rumen | stover | Negative | biosynthesis of polyunsaturated fatty acids | 9.12E-04 | 58   |
|       | Corn   |          |                                             |          |      |
| Rumen | stover | Negative | polyubiquitination                          | 9.18E-04 | 25   |
|       | Corn   |          |                                             |          |      |
| Rumen | stover | Negative | biosynthesis of nucleoside triphosphate     | 9.39E-04 | 31   |
|       | Corn   |          |                                             |          |      |
| Rumen | stover | Negative | morphology of fibroblast cell lines         | 9.46E-04 | 26   |
|       | Corn   |          |                                             |          |      |
| Rumen | stover | Negative | peripheral arterial disease                 | 9.50E-04 | 55   |
|       | Corn   |          |                                             |          |      |
| Rumen | stover | Negative | apoptosis of kidney cell lines              | 9.50E-04 | 61   |
|       | Corn   |          |                                             |          |      |
| Rumen | stover | Negative | quantity of neurons                         | 9.50E-04 | 101  |
|       | Corn   |          |                                             |          |      |
| Rumen | stover | Negative | infection by HIV-1                          | 9.55E-04 | 143  |
|       | Corn   |          |                                             |          |      |
| Rumen | stover | Negative | formation of lung                           | 9.70E-04 | 75   |
|       | Corn   |          |                                             |          |      |
| Rumen | stover | Negative | hepatocellular carcinoma                    | 9.73E-04 | 871  |
|       | Corn   |          |                                             |          |      |
| Rumen | stover | Negative | synthesis of eicosanoid                     | 9.86E-04 | 57   |
|       | Corn   |          |                                             |          |      |
| Rumen | stover | Negative | breast or colorectal cancer                 | 9.97E-04 | 1026 |
|       | Corn   |          |                                             |          |      |
| Rumen | stover | Negative | development of exocrine gland               | 1.00E-03 | 58   |
|       | Corn   |          |                                             |          |      |
| Rumen | stover | Negative | exocytosis                                  | 1.02E-03 | 50   |
|       | Corn   |          |                                             |          |      |
| Rumen | stover | Negative | formation of T lymphocytes                  | 1.04E-03 | 33   |
|       | Corn   |          |                                             |          |      |
| Rumen | stover | Negative | quantity of hematopoietic progenitor cells  | 1.04E-03 | 106  |
|       | Corn   |          |                                             |          |      |
| Rumen | stover | Negative | colony formation of lung cancer cell lines  | 1.04E-03 | 17   |
|       | Corn   |          |                                             |          |      |
| Rumen | stover | Negative | abnormal morphology of artery               | 1.06E-03 | 41   |
|       | Corn   |          |                                             |          |      |
| Rumen | stover | Negative | cell movement of neutrophils                | 1.06E-03 | 74   |
|       | Corn   |          |                                             |          |      |
| Rumen | stover | Negative | apoptosis of melanoma cell lines            | 1.06E-03 | 36   |
| Rumen | Corn   | Negative | transport of metal                          | 1.06E-03 | 82   |

|          | stover  |          |                                |          |      |
|----------|---------|----------|--------------------------------|----------|------|
|          | Alfalfa |          |                                |          |      |
| Duodenum | hay     | Positive | proliferation of cells         | 5.46E-12 | 586  |
|          | Alfalfa |          |                                |          |      |
| Duodenum | hay     | Positive | necrosis                       | 1.69E-11 | 429  |
|          | Alfalfa |          |                                |          |      |
| Duodenum | hay     | Positive | organization of cytoplasm      | 2.10E-11 | 279  |
|          | Alfalfa |          |                                |          |      |
| Duodenum | hay     | Positive | cell death                     | 2.75E-10 | 526  |
|          | Alfalfa |          |                                |          |      |
| Duodenum | hay     | Positive | organismal death               | 5.65E-10 | 395  |
|          | Alfalfa |          |                                |          |      |
| Duodenum | hay     | Positive | morbidity or mortality         | 1.51E-09 | 397  |
|          | Alfalfa |          |                                |          |      |
| Duodenum | hay     | Positive | organization of cytoskeleton   | 2.22E-09 | 249  |
|          | Alfalfa |          |                                |          |      |
| Duodenum | hay     | Positive | apoptosis                      | 3.76E-09 | 424  |
|          | Alfalfa |          |                                |          |      |
| Duodenum | hay     | Positive | transport of molecule          | 1.14E-08 | 277  |
|          | Alfalfa |          |                                |          |      |
| Duodenum | hay     | Positive | morphology of cells            | 2.02E-08 | 323  |
|          | Alfalfa |          |                                |          |      |
| Duodenum | hay     | Positive | cancer                         | 3.21E-08 | 1463 |
|          | Alfalfa |          |                                |          |      |
| Duodenum | hay     | Positive | microtubule dynamics           | 3.21E-08 | 212  |
|          | Alfalfa |          |                                |          |      |
| Duodenum | hay     | Positive | malignant solid tumor          | 6.27E-08 | 1445 |
|          | Alfalfa |          |                                |          |      |
| Duodenum | hay     | Positive | cell death of tumor cell lines | 1.21E-07 | 259  |
|          | Alfalfa |          |                                |          |      |
| Duodenum | hay     | Positive | dyskinesia                     | 1.34E-07 | 122  |
|          | Alfalfa |          |                                |          |      |
| Duodenum | hay     | Positive | cellular homeostasis           | 2.08E-07 | 257  |
|          | Alfalfa |          |                                |          |      |
| Duodenum | hay     | Positive | cell movement                  | 3.20E-07 | 341  |
|          | Alfalfa |          |                                |          |      |
| Duodenum | hay     | Positive | neurological signs             | 3.20E-07 | 126  |
|          | Alfalfa |          |                                |          |      |
| Duodenum | hay     | Positive | Huntington's Disease           | 4.87E-07 | 113  |
|          | Alfalfa |          |                                |          |      |
| Duodenum | hay     | Positive | apoptosis of tumor cell lines  | 4.87E-07 | 210  |
|          | Alfalfa |          |                                |          |      |
| Duodenum | hay     | Positive | transcription of DNA           | 6.52E-07 | 256  |
| Duodenum | Alfalfa | Positive | expression of RNA              | 7.53E-07 | 341  |

|          |         |          |                                          |          |      |
|----------|---------|----------|------------------------------------------|----------|------|
|          | hay     |          |                                          |          |      |
|          | Alfalfa |          |                                          |          |      |
| Duodenum | hay     | Positive | transcription of RNA                     | 1.07E-06 | 300  |
|          | Alfalfa |          |                                          |          |      |
| Duodenum | hay     | Positive | disorder of basal ganglia                | 1.75E-06 | 141  |
|          | Alfalfa |          |                                          |          |      |
| Duodenum | hay     | Positive | Movement Disorders                       | 2.78E-06 | 184  |
|          | Alfalfa |          |                                          |          |      |
| Duodenum | hay     | Positive | epileptic seizure                        | 6.09E-06 | 41   |
|          | Alfalfa |          |                                          |          |      |
| Duodenum | hay     | Positive | formation of cellular protrusions        | 6.79E-06 | 159  |
|          | Alfalfa |          |                                          |          |      |
| Duodenum | hay     | Positive | transcription                            | 6.79E-06 | 314  |
|          | Alfalfa |          |                                          |          |      |
| Duodenum | hay     | Positive | differentiation of cells                 | 9.42E-06 | 348  |
|          | Alfalfa |          |                                          |          |      |
| Duodenum | hay     | Positive | proliferation of tumor cell lines        | 9.42E-06 | 251  |
|          | Alfalfa |          |                                          |          |      |
| Duodenum | hay     | Positive | epithelial cancer                        | 1.64E-05 | 1189 |
|          | Alfalfa |          |                                          |          |      |
| Duodenum | hay     | Positive | proliferation of neuronal cells          | 1.90E-05 | 107  |
|          | Alfalfa |          |                                          |          |      |
| Duodenum | hay     | Positive | size of body                             | 1.90E-05 | 149  |
|          | Alfalfa |          |                                          |          |      |
| Duodenum | hay     | Positive | transactivation                          | 2.27E-05 | 107  |
|          | Alfalfa |          |                                          |          |      |
| Duodenum | hay     | Positive | seizures                                 | 3.26E-05 | 78   |
|          | Alfalfa |          |                                          |          |      |
| Duodenum | hay     | Positive | homing of cells                          | 3.57E-05 | 103  |
|          | Alfalfa |          |                                          |          |      |
| Duodenum | hay     | Positive | neoplasia of epithelial tissue           | 3.84E-05 | 1196 |
|          | Alfalfa |          |                                          |          |      |
| Duodenum | hay     | Positive | migration of cells                       | 3.87E-05 | 296  |
|          | Alfalfa |          |                                          |          |      |
| Duodenum | hay     | Positive | chemotaxis of cells                      | 3.87E-05 | 98   |
|          | Alfalfa |          |                                          |          |      |
| Duodenum | hay     | Positive | proliferation of connective tissue cells | 4.33E-05 | 108  |
|          | Alfalfa |          |                                          |          |      |
| Duodenum | hay     | Positive | transactivation of RNA                   | 5.16E-05 | 100  |
|          | Alfalfa |          |                                          |          |      |
| Duodenum | hay     | Positive | apoptosis of cervical cancer cell lines  | 5.16E-05 | 58   |
|          | Alfalfa |          |                                          |          |      |
| Duodenum | hay     | Positive | neuromuscular disease                    | 6.19E-05 | 151  |
| Duodenum | Alfalfa | Positive | invasion of cells                        | 6.19E-05 | 149  |



|          |         |          |                                          |          |      |
|----------|---------|----------|------------------------------------------|----------|------|
|          | hay     |          |                                          |          |      |
|          | Alfalfa |          |                                          |          |      |
| Duodenum | hay     | Positive | activation of DNA endogenous promoter    | 6.74E-05 | 198  |
|          | Alfalfa |          |                                          |          |      |
| Duodenum | hay     | Positive | angiogenesis                             | 7.47E-05 | 154  |
|          | Alfalfa |          |                                          |          |      |
| Duodenum | hay     | Positive | tumorigenesis of tissue                  | 8.12E-05 | 1211 |
|          | Alfalfa |          |                                          |          |      |
| Duodenum | hay     | Positive | development of body trunk                | 8.32E-05 | 184  |
|          | Alfalfa |          |                                          |          |      |
| Duodenum | hay     | Positive | neuritogenesis                           | 8.68E-05 | 105  |
|          | Alfalfa |          |                                          |          |      |
| Duodenum | hay     | Positive | development of neurons                   | 9.27E-05 | 135  |
|          | Alfalfa |          |                                          |          |      |
| Duodenum | hay     | Positive | growth of connective tissue              | 1.03E-04 | 114  |
|          | Alfalfa |          |                                          |          |      |
| Duodenum | hay     | Positive | seizure disorder                         | 1.06E-04 | 87   |
|          | Alfalfa |          |                                          |          |      |
| Duodenum | hay     | Positive | cell death of cervical cancer cell lines | 1.11E-04 | 68   |
|          | Alfalfa |          |                                          |          |      |
| Duodenum | hay     | Positive | formation of cytoskeleton                | 1.14E-04 | 72   |
|          | Alfalfa |          |                                          |          |      |
| Duodenum | hay     | Positive | formation of plasma membrane projections | 1.44E-04 | 106  |
|          | Alfalfa |          |                                          |          |      |
| Duodenum | hay     | Positive | development of cytoplasm                 | 1.64E-04 | 85   |
|          | Alfalfa |          |                                          |          |      |
| Duodenum | hay     | Positive | degeneration of nervous system           | 1.77E-04 | 57   |
|          | Alfalfa |          |                                          |          |      |
| Duodenum | hay     | Positive | quantity of cells                        | 2.02E-04 | 272  |
|          | Alfalfa |          |                                          |          |      |
| Duodenum | hay     | Positive | degeneration of cells                    | 2.02E-04 | 66   |
|          | Alfalfa |          |                                          |          |      |
| Duodenum | hay     | Positive | neuronal cell death                      | 2.14E-04 | 118  |
|          | Alfalfa |          |                                          |          |      |
| Duodenum | hay     | Positive | cell survival                            | 2.15E-04 | 220  |
|          | Alfalfa |          |                                          |          |      |
| Duodenum | hay     | Positive | cell death of connective tissue cells    | 2.23E-04 | 106  |
|          | Alfalfa |          |                                          |          |      |
| Duodenum | hay     | Positive | apoptosis of connective tissue cells     | 2.27E-04 | 58   |
|          | Alfalfa |          |                                          |          |      |
| Duodenum | hay     | Positive | cell spreading of fibroblast cell lines  | 2.31E-04 | 17   |
|          | Alfalfa |          |                                          |          |      |
| Duodenum | hay     | Positive | Growth Failure                           | 2.61E-04 | 105  |
| Duodenum | Alfalfa | Positive | growth of neurites                       | 2.65E-04 | 84   |

|          |         |          |                                        |          |     |
|----------|---------|----------|----------------------------------------|----------|-----|
|          | hay     |          |                                        |          |     |
|          | Alfalfa |          |                                        |          |     |
| Duodenum | hay     | Positive | abnormal morphology of thoracic cavity | 2.81E-04 | 103 |
|          | Alfalfa |          |                                        |          |     |
| Duodenum | hay     | Positive | transport of carbohydrate              | 2.88E-04 | 41  |
|          | Alfalfa |          |                                        |          |     |
| Duodenum | hay     | Positive | cell movement of tumor cell lines      | 3.37E-04 | 142 |
|          | Alfalfa |          |                                        |          |     |
| Duodenum | hay     | Positive | branching of cells                     | 3.56E-04 | 69  |
|          | Alfalfa |          |                                        |          |     |
| Duodenum | hay     | Positive | shape change of fibroblast cell lines  | 3.89E-04 | 23  |
|          | Alfalfa |          |                                        |          |     |
| Duodenum | hay     | Positive | epilepsy                               | 3.95E-04 | 59  |
|          | Alfalfa |          |                                        |          |     |
| Duodenum | hay     | Positive | metabolism of reactive oxygen species  | 3.97E-04 | 89  |
|          | Alfalfa |          |                                        |          |     |
| Duodenum | hay     | Positive | Organ Degeneration                     | 3.97E-04 | 88  |
|          | Alfalfa |          |                                        |          |     |
| Duodenum | hay     | Positive | congenital malformation of skeleton    | 4.16E-04 | 77  |
|          | Alfalfa |          |                                        |          |     |
| Duodenum | hay     | Positive | frequency of head and neck tumor       | 5.03E-04 | 6   |
|          | Alfalfa |          |                                        |          |     |
| Duodenum | hay     | Positive | morphogenesis of neurons               | 5.03E-04 | 77  |
|          | Alfalfa |          |                                        |          |     |
| Duodenum | hay     | Positive | vasculogenesis                         | 5.27E-04 | 124 |
|          | Alfalfa |          |                                        |          |     |
| Duodenum | hay     | Positive | synthesis of reactive oxygen species   | 6.53E-04 | 85  |
|          | Alfalfa |          |                                        |          |     |
| Duodenum | hay     | Positive | morphology of connective tissue        | 6.61E-04 | 82  |
|          | Alfalfa |          |                                        |          |     |
| Duodenum | hay     | Positive | organization of organelle              | 6.61E-04 | 94  |
|          | Alfalfa |          |                                        |          |     |
| Duodenum | hay     | Positive | morphology of cardiovascular system    | 6.86E-04 | 106 |
|          | Alfalfa |          |                                        |          |     |
| Duodenum | hay     | Positive | quantity of blood cells                | 7.73E-04 | 165 |
|          | Alfalfa |          |                                        |          |     |
| Duodenum | hay     | Positive | degeneration of neurons                | 7.73E-04 | 47  |
|          | Alfalfa |          |                                        |          |     |
| Duodenum | hay     | Positive | cell viability                         | 7.82E-04 | 203 |
|          | Alfalfa |          |                                        |          |     |
| Duodenum | hay     | Positive | morphogenesis of neurites              | 8.51E-04 | 75  |
|          | Alfalfa |          |                                        |          |     |
| Duodenum | hay     | Positive | colony formation                       | 8.51E-04 | 93  |
| Duodenum | Alfalfa | Positive | size of animal                         | 8.65E-04 | 37  |

|          |         |          |                                             |          |      |
|----------|---------|----------|---------------------------------------------|----------|------|
|          | hay     |          |                                             |          |      |
|          | Alfalfa |          |                                             |          |      |
| Duodenum | hay     | Positive | colony formation of cells                   | 9.55E-04 | 86   |
|          | Alfalfa |          |                                             |          |      |
| Duodenum | hay     | Positive | craniofacial abnormality                    | 9.75E-04 | 65   |
|          | Alfalfa |          |                                             |          |      |
| Duodenum | hay     | Positive | outgrowth of cells                          | 9.75E-04 | 77   |
|          | Alfalfa |          |                                             |          |      |
| Duodenum | hay     | Positive | cellular degradation                        | 9.75E-04 | 49   |
|          | Alfalfa |          |                                             |          |      |
| Duodenum | hay     | Positive | adhesion of carcinoma cell lines            | 9.75E-04 | 13   |
|          | Alfalfa |          |                                             |          |      |
| Duodenum | hay     | Positive | Edema                                       | 1.08E-03 | 63   |
|          | Alfalfa |          |                                             |          |      |
| Duodenum | hay     | Positive | quantity of leukocytes                      | 1.11E-03 | 148  |
|          | Alfalfa |          |                                             |          |      |
| Duodenum | hay     | Positive | outgrowth of neurites                       | 1.26E-03 | 72   |
|          | Alfalfa |          |                                             |          |      |
| Duodenum | hay     | Positive | formation of filaments                      | 1.26E-03 | 71   |
|          | Alfalfa |          | abnormal morphology of vascular endothelial |          |      |
| Duodenum | hay     | Positive | cells                                       | 1.29E-03 | 13   |
|          | Alfalfa |          |                                             |          |      |
| Duodenum | hay     | Positive | shape change of kidney cell lines           | 1.29E-03 | 17   |
|          | Alfalfa |          |                                             |          |      |
| Duodenum | hay     | Positive | fibrogenesis                                | 1.30E-03 | 73   |
|          | Alfalfa |          |                                             |          |      |
| Duodenum | hay     | Positive | cell spreading                              | 1.34E-03 | 52   |
|          | Alfalfa |          |                                             |          |      |
| Duodenum | hay     | Positive | abnormal morphology of epithelial tissue    | 1.34E-03 | 74   |
|          | Alfalfa |          |                                             |          |      |
| Duodenum | hay     | Positive | development of vasculature                  | 1.34E-03 | 74   |
|          | Alfalfa |          |                                             |          |      |
| Duodenum | hay     | Positive | sprouting                                   | 1.36E-03 | 69   |
|          | Alfalfa |          |                                             |          |      |
| Duodenum | hay     | Positive | transformation of fibroblast cell lines     | 1.36E-03 | 49   |
|          | Alfalfa |          |                                             |          |      |
| Duodenum | hay     | Positive | digestive system cancer                     | 1.36E-03 | 1008 |
|          | Alfalfa |          |                                             |          |      |
| Duodenum | hay     | Positive | Neurodegeneration                           | 1.37E-03 | 57   |
|          | Alfalfa |          |                                             |          |      |
| Duodenum | hay     | Positive | abnormal morphology of cells                | 1.39E-03 | 196  |
|          | Alfalfa |          |                                             |          |      |
| Duodenum | hay     | Positive | synthesis of lipid                          | 1.43E-03 | 118  |
| Duodenum | Alfalfa | Positive | transport of monosaccharide                 | 1.46E-03 | 33   |

|          |         |          |                                       |          |      |
|----------|---------|----------|---------------------------------------|----------|------|
|          | hay     |          |                                       |          |      |
|          | Alfalfa |          |                                       |          |      |
| Duodenum | hay     | Positive | perinatal death                       | 1.64E-03 | 100  |
|          | Alfalfa |          |                                       |          |      |
| Duodenum | hay     | Positive | function of cardiovascular system     | 1.68E-03 | 66   |
|          | Alfalfa |          |                                       |          |      |
| Duodenum | hay     | Positive | abnormal quantity of lipid            | 1.69E-03 | 31   |
|          | Alfalfa |          |                                       |          |      |
| Duodenum | hay     | Positive | cell death of cerebral cortex cells   | 1.83E-03 | 44   |
|          | Alfalfa |          |                                       |          |      |
| Duodenum | hay     | Positive | digestive organ tumor                 | 1.95E-03 | 1015 |
|          | Alfalfa |          |                                       |          |      |
| Duodenum | hay     | Positive | apoptosis of epithelial cell lines    | 2.05E-03 | 43   |
|          | Alfalfa |          |                                       |          |      |
| Duodenum | hay     | Positive | production of reactive oxygen species | 2.14E-03 | 65   |
|          | Alfalfa |          |                                       |          |      |
| Duodenum | hay     | Positive | growth of lesion                      | 2.18E-03 | 129  |
|          | Alfalfa |          |                                       |          |      |
| Duodenum | hay     | Positive | cell death of embryonic stem cells    | 2.22E-03 | 14   |
|          | Alfalfa |          |                                       |          |      |
| Duodenum | hay     | Positive | oxidation of palmitic acid            | 2.22E-03 | 14   |
|          | Alfalfa |          |                                       |          |      |
| Duodenum | hay     | Positive | formation of cells                    | 2.53E-03 | 155  |
|          | Alfalfa |          |                                       |          |      |
| Duodenum | hay     | Positive | cell transformation                   | 2.59E-03 | 79   |
|          | Alfalfa |          |                                       |          |      |
| Duodenum | hay     | Positive | morphology of endothelial cells       | 2.79E-03 | 16   |
|          | Alfalfa |          |                                       |          |      |
| Duodenum | hay     | Positive | oral cancer                           | 2.82E-03 | 43   |
|          | Alfalfa |          |                                       |          |      |
| Duodenum | hay     | Positive | cell death of brain                   | 2.84E-03 | 53   |
|          | Alfalfa |          |                                       |          |      |
| Duodenum | hay     | Positive | cell movement of phagocytes           | 2.85E-03 | 92   |
|          | Alfalfa |          |                                       |          |      |
| Duodenum | hay     | Positive | growth of tumor                       | 2.89E-03 | 128  |
|          | Alfalfa |          |                                       |          |      |
| Duodenum | hay     | Positive | cell movement of macrophages          | 2.96E-03 | 49   |
|          | Alfalfa |          |                                       |          |      |
| Duodenum | hay     | Positive | quantity of TNF in blood              | 3.00E-03 | 19   |
|          | Alfalfa |          |                                       |          |      |
| Duodenum | hay     | Positive | cell death of brain cells             | 3.00E-03 | 50   |
|          | Alfalfa |          |                                       |          |      |
| Duodenum | hay     | Positive | transport of water                    | 3.09E-03 | 9    |
| Duodenum | Alfalfa | Positive | adjuvant arthritis                    | 3.26E-03 | 11   |

|          |         |          |                                              |          |      |
|----------|---------|----------|----------------------------------------------|----------|------|
|          | hay     |          |                                              |          |      |
|          | Alfalfa |          |                                              |          |      |
| Duodenum | hay     | Positive | fatty acid oxidation disorder                | 3.35E-03 | 10   |
|          | Alfalfa |          |                                              |          |      |
| Duodenum | hay     | Positive | inflammatory response                        | 3.40E-03 | 125  |
|          | Alfalfa |          |                                              |          |      |
| Duodenum | hay     | Positive | cell movement of leukocytes                  | 3.81E-03 | 123  |
|          | Alfalfa |          |                                              |          |      |
| Duodenum | hay     | Positive | abnormal morphology of cardiovascular system | 3.81E-03 | 94   |
|          | Alfalfa |          |                                              |          |      |
| Duodenum | hay     | Positive | necrosis of epithelial tissue                | 3.96E-03 | 97   |
|          | Alfalfa |          |                                              |          |      |
| Duodenum | hay     | Positive | cell death of epithelial cell lines          | 3.96E-03 | 51   |
|          | Alfalfa |          |                                              |          |      |
| Duodenum | hay     | Positive | congenital anomaly of digestive system       | 3.96E-03 | 43   |
|          | Alfalfa |          |                                              |          |      |
| Duodenum | hay     | Positive | quantity of thymocytes                       | 3.96E-03 | 43   |
|          | Alfalfa |          |                                              |          |      |
| Duodenum | hay     | Positive | cycling of centrosome                        | 4.10E-03 | 20   |
|          | Alfalfa |          |                                              |          |      |
| Duodenum | hay     | Positive | morphology of cardiovascular tissue          | 4.10E-03 | 20   |
|          | Alfalfa |          |                                              |          |      |
| Duodenum | hay     | Positive | morphology of vascular endothelial cells     | 4.12E-03 | 14   |
|          | Alfalfa |          |                                              |          |      |
| Duodenum | hay     | Positive | branching of neurites                        | 4.43E-03 | 50   |
|          | Alfalfa |          |                                              |          |      |
| Duodenum | hay     | Positive | abnormal morphology of endothelial tissue    | 4.62E-03 | 16   |
|          | Alfalfa |          |                                              |          |      |
| Duodenum | hay     | Positive | cell death of epithelial cells               | 4.71E-03 | 83   |
|          | Alfalfa |          |                                              |          |      |
| Duodenum | hay     | Positive | shape change of neurites                     | 4.77E-03 | 51   |
|          | Alfalfa |          |                                              |          |      |
| Duodenum | hay     | Positive | abdominal neoplasm                           | 4.78E-03 | 1163 |
|          | Alfalfa |          |                                              |          |      |
| Duodenum | hay     | Positive | transport of D-glucose                       | 4.78E-03 | 29   |
|          | Alfalfa |          |                                              |          |      |
| Duodenum | hay     | Positive | midline defect                               | 4.79E-03 | 48   |
|          | Alfalfa |          |                                              |          |      |
| Duodenum | hay     | Positive | formation of actin filaments                 | 4.80E-03 | 54   |
|          | Alfalfa |          |                                              |          |      |
| Duodenum | hay     | Positive | formation of thymus gland                    | 4.85E-03 | 32   |
|          | Alfalfa |          |                                              |          |      |
| Duodenum | hay     | Positive | autosomal recessive disease                  | 5.10E-03 | 144  |
| Duodenum | Alfalfa | Positive | concentration of fatty acid                  | 5.25E-03 | 50   |

|          |         |          |                                        |          |      |
|----------|---------|----------|----------------------------------------|----------|------|
|          | hay     |          |                                        |          |      |
|          | Alfalfa |          |                                        |          |      |
| Duodenum | hay     | Positive | osmotic water permeability of cells    | 5.34E-03 | 4    |
|          | Alfalfa |          |                                        |          |      |
| Duodenum | hay     | Positive | cell movement of myeloid cells         | 5.34E-03 | 89   |
|          | Alfalfa |          |                                        |          |      |
| Duodenum | hay     | Positive | inborn error of lipid metabolism       | 5.34E-03 | 11   |
|          | Alfalfa |          |                                        |          |      |
| Duodenum | hay     | Positive | oral squamous cell carcinoma           | 5.69E-03 | 34   |
|          | Alfalfa |          |                                        |          |      |
| Duodenum | hay     | Positive | development of head                    | 5.82E-03 | 152  |
|          | Alfalfa |          |                                        |          |      |
| Duodenum | hay     | Positive | migration of tumor cell lines          | 5.86E-03 | 113  |
|          | Alfalfa |          |                                        |          |      |
| Duodenum | hay     | Positive | cell death of hippocampal cells        | 5.89E-03 | 21   |
|          | Alfalfa |          |                                        |          |      |
| Duodenum | hay     | Positive | cell spreading of kidney cell lines    | 5.95E-03 | 9    |
|          | Alfalfa |          |                                        |          |      |
| Duodenum | hay     | Positive | cell death of immune cells             | 6.36E-03 | 106  |
|          | Alfalfa |          |                                        |          |      |
| Duodenum | hay     | Positive | morphology of body cavity              | 6.39E-03 | 181  |
|          | Alfalfa |          |                                        |          |      |
| Duodenum | hay     | Positive | differentiation of connective tissue   | 6.54E-03 | 116  |
|          | Alfalfa |          |                                        |          |      |
| Duodenum | hay     | Positive | multiple congenital anomalies          | 6.69E-03 | 71   |
|          | Alfalfa |          |                                        |          |      |
| Duodenum | hay     | Positive | oxidation of fatty acid                | 6.75E-03 | 33   |
|          | Alfalfa |          |                                        |          |      |
| Duodenum | hay     | Positive | Viral Infection                        | 7.33E-03 | 237  |
|          | Alfalfa |          |                                        |          |      |
| Duodenum | hay     | Positive | proliferation of fibroblast cell lines | 7.40E-03 | 71   |
|          | Alfalfa |          |                                        |          |      |
| Duodenum | hay     | Positive | cell movement of carcinoma cell lines  | 7.67E-03 | 38   |
|          | Alfalfa |          |                                        |          |      |
| Duodenum | hay     | Positive | cell death of hippocampal neurons      | 7.93E-03 | 19   |
|          | Alfalfa |          |                                        |          |      |
| Duodenum | hay     | Positive | abdominal cancer                       | 7.93E-03 | 1147 |
|          | Alfalfa |          |                                        |          |      |
| Duodenum | hay     | Positive | neutrophilia                           | 8.04E-03 | 15   |
|          | Alfalfa |          |                                        |          |      |
| Duodenum | hay     | Positive | attachment of cells                    | 8.10E-03 | 27   |
|          | Alfalfa |          |                                        |          |      |
| Duodenum | hay     | Positive | consumption of oxygen                  | 8.21E-03 | 30   |
| Duodenum | Alfalfa | Positive | morphology of nervous system           | 8.21E-03 | 123  |

|          |         |          |                                            |          |     |
|----------|---------|----------|--------------------------------------------|----------|-----|
|          | hay     |          |                                            |          |     |
|          | Alfalfa |          |                                            |          |     |
| Duodenum | hay     | Positive | quantity of connective tissue              | 8.32E-03 | 97  |
|          | Alfalfa |          |                                            |          |     |
| Duodenum | hay     | Positive | axonogenesis                               | 8.32E-03 | 41  |
|          | Alfalfa |          |                                            |          |     |
| Duodenum | hay     | Positive | invasion of tumor cell lines               | 8.35E-03 | 106 |
|          | Alfalfa |          |                                            |          |     |
| Duodenum | hay     | Positive | oxidation of long chain fatty acid         | 8.42E-03 | 16  |
|          | Alfalfa |          |                                            |          |     |
| Duodenum | hay     | Positive | formation of actin stress fibers           | 8.69E-03 | 43  |
|          | Alfalfa |          |                                            |          |     |
| Duodenum | hay     | Positive | familial dementia                          | 8.94E-03 | 12  |
|          | Alfalfa |          |                                            |          |     |
| Duodenum | hay     | Positive | cell death of breast cancer cell lines     | 9.24E-03 | 57  |
|          | Alfalfa |          |                                            |          |     |
| Duodenum | hay     | Positive | leukocyte migration                        | 9.41E-03 | 135 |
|          | Alfalfa |          |                                            |          |     |
| Duodenum | hay     | Positive | mass of organism                           | 9.77E-03 | 57  |
|          | Alfalfa |          |                                            |          |     |
| Duodenum | hay     | Positive | transport of carboxylic acid               | 1.00E-02 | 24  |
|          | Alfalfa |          |                                            |          |     |
| Duodenum | hay     | Positive | oral cavity carcinoma                      | 1.00E-02 | 36  |
|          | Alfalfa |          |                                            |          |     |
| Duodenum | hay     | Positive | mass of adipose tissue                     | 1.03E-02 | 35  |
|          | Alfalfa |          |                                            |          |     |
| Duodenum | hay     | Positive | fatty acid metabolism                      | 1.08E-02 | 96  |
|          | Alfalfa |          |                                            |          |     |
| Duodenum | hay     | Positive | concentration of lipid                     | 1.08E-02 | 126 |
|          | Alfalfa |          |                                            |          |     |
| Duodenum | hay     | Positive | familial Alzheimer's disease               | 1.08E-02 | 9   |
|          | Alfalfa |          |                                            |          |     |
| Duodenum | hay     | Positive | abnormal morphology of head                | 1.09E-02 | 129 |
|          | Alfalfa |          |                                            |          |     |
| Duodenum | hay     | Positive | differentiation of connective tissue cells | 1.09E-02 | 102 |
|          | Alfalfa |          |                                            |          |     |
| Duodenum | hay     | Positive | migration of carcinoma cell lines          | 1.10E-02 | 32  |
|          | Alfalfa |          |                                            |          |     |
| Duodenum | hay     | Positive | morphology of head                         | 1.12E-02 | 135 |
|          | Alfalfa |          |                                            |          |     |
| Duodenum | hay     | Positive | hydrolysis of GTP                          | 1.12E-02 | 16  |
|          | Alfalfa |          |                                            |          |     |
| Duodenum | hay     | Positive | small GTPase mediated signal transduction  | 1.12E-02 | 34  |
| Duodenum | Alfalfa | Positive | proliferation of embryonic cell lines      | 1.12E-02 | 30  |

|          |         |          |                                         |          |     |
|----------|---------|----------|-----------------------------------------|----------|-----|
|          | hay     |          |                                         |          |     |
|          | Alfalfa |          |                                         |          |     |
| Duodenum | hay     | Positive | size of embryo                          | 1.13E-02 | 60  |
|          | Alfalfa |          |                                         |          |     |
| Duodenum | hay     | Positive | Bleeding                                | 1.14E-02 | 70  |
|          | Alfalfa |          |                                         |          |     |
| Duodenum | hay     | Positive | autosomal dominant disease              | 1.14E-02 | 101 |
|          | Alfalfa |          |                                         |          |     |
| Duodenum | hay     | Positive | quantity of mononuclear leukocytes      | 1.14E-02 | 115 |
|          | Alfalfa |          |                                         |          |     |
| Duodenum | hay     | Positive | quantity of lymphocytes                 | 1.14E-02 | 111 |
|          | Alfalfa |          |                                         |          |     |
| Duodenum | hay     | Positive | cell death of blood cells               | 1.14E-02 | 109 |
|          | Alfalfa |          |                                         |          |     |
| Duodenum | hay     | Positive | paralysis                               | 1.18E-02 | 31  |
|          | Alfalfa |          |                                         |          |     |
| Duodenum | hay     | Positive | cellular infiltration by macrophages    | 1.20E-02 | 30  |
|          | Alfalfa |          |                                         |          |     |
| Duodenum | hay     | Positive | homo-oligomerization of protein         | 1.22E-02 | 26  |
|          | Alfalfa |          |                                         |          |     |
| Duodenum | hay     | Positive | neonatal death                          | 1.23E-02 | 72  |
|          | Alfalfa |          |                                         |          |     |
| Duodenum | hay     | Positive | morphology of heart                     | 1.24E-02 | 67  |
|          | Alfalfa |          |                                         |          |     |
| Duodenum | hay     | Positive | morphology of respiratory system        | 1.24E-02 | 53  |
|          | Alfalfa |          |                                         |          |     |
| Duodenum | hay     | Positive | cell death of fibroblasts               | 1.24E-02 | 46  |
|          | Alfalfa |          |                                         |          |     |
| Duodenum | hay     | Positive | accumulation of reactive oxygen species | 1.24E-02 | 18  |
|          | Alfalfa |          |                                         |          |     |
| Duodenum | hay     | Positive | morphology of endothelial tissue        | 1.24E-02 | 18  |
|          | Alfalfa |          |                                         |          |     |
| Duodenum | hay     | Positive | metabolism of protein                   | 1.24E-02 | 148 |
|          | Alfalfa |          |                                         |          |     |
| Duodenum | hay     | Positive | barrier function of skin                | 1.25E-02 | 11  |
|          | Alfalfa |          |                                         |          |     |
| Duodenum | hay     | Positive | morphology of stratum corneum           | 1.25E-02 | 11  |
|          | Alfalfa |          |                                         |          |     |
| Duodenum | hay     | Positive | ruffling                                | 1.31E-02 | 22  |
|          | Alfalfa |          |                                         |          |     |
| Duodenum | hay     | Positive | quantity of lipid peroxide              | 1.31E-02 | 7   |
|          | Alfalfa |          |                                         |          |     |
| Duodenum | hay     | Positive | cell death of fibroblast cell lines     | 1.31E-02 | 70  |
| Duodenum | Alfalfa | Positive | behavior                                | 1.31E-02 | 150 |



|          |         |          |                                           |          |     |
|----------|---------|----------|-------------------------------------------|----------|-----|
|          | hay     |          |                                           |          |     |
|          | Alfalfa |          |                                           |          |     |
| Duodenum | hay     | Positive | proliferation of fibroblasts              | 1.33E-02 | 59  |
|          | Alfalfa |          |                                           |          |     |
| Duodenum | hay     | Positive | formation of skin                         | 1.36E-02 | 61  |
|          | Alfalfa |          |                                           |          |     |
| Duodenum | hay     | Positive | secretion of molecule                     | 1.36E-02 | 88  |
|          | Alfalfa |          |                                           |          |     |
| Duodenum | hay     | Positive | thermogenesis                             | 1.38E-02 | 15  |
|          | Alfalfa |          |                                           |          |     |
| Duodenum | hay     | Positive | development of abdomen                    | 1.40E-02 | 92  |
|          | Alfalfa |          |                                           |          |     |
| Duodenum | hay     | Positive | abnormal morphology of respiratory system | 1.43E-02 | 52  |
|          | Alfalfa |          |                                           |          |     |
| Duodenum | hay     | Positive | autophagy                                 | 1.47E-02 | 62  |
|          | Alfalfa |          |                                           |          |     |
| Duodenum | hay     | Positive | abnormal morphology of stratum corneum    | 1.48E-02 | 10  |
|          | Alfalfa |          |                                           |          |     |
| Duodenum | hay     | Positive | arrest in proliferation of cells          | 1.50E-02 | 38  |
|          | Alfalfa |          |                                           |          |     |
| Duodenum | hay     | Positive | quantity of lymphoid organ                | 1.51E-02 | 52  |
|          | Alfalfa |          |                                           |          |     |
| Duodenum | hay     | Positive | mass of connective tissue                 | 1.52E-02 | 36  |
|          | Alfalfa |          |                                           |          |     |
| Duodenum | hay     | Positive | fusion of cellular membrane               | 1.52E-02 | 14  |
|          | Alfalfa |          |                                           |          |     |
| Duodenum | hay     | Positive | apoptosis of melanoma cell lines          | 1.52E-02 | 25  |
|          | Alfalfa |          |                                           |          |     |
| Duodenum | hay     | Positive | development of body axis                  | 1.56E-02 | 158 |
|          | Alfalfa |          |                                           |          |     |
| Duodenum | hay     | Positive | cell viability of tumor cell lines        | 1.56E-02 | 120 |
|          | Alfalfa |          |                                           |          |     |
| Duodenum | hay     | Positive | cell movement of antigen presenting cells | 1.61E-02 | 58  |
|          | Alfalfa |          |                                           |          |     |
| Duodenum | hay     | Positive | abnormal morphology of body cavity        | 1.61E-02 | 170 |
|          | Alfalfa |          |                                           |          |     |
| Duodenum | hay     | Positive | abnormal morphology of mandibular angle   | 1.61E-02 | 4   |
|          | Alfalfa |          |                                           |          |     |
| Duodenum | hay     | Positive | frequency of brain tumor                  | 1.61E-02 | 4   |
|          | Alfalfa |          |                                           |          |     |
| Duodenum | hay     | Positive | targeting of protein                      | 1.65E-02 | 25  |
|          | Alfalfa |          |                                           |          |     |
| Duodenum | hay     | Positive | proliferation of epidermal cells          | 1.65E-02 | 31  |
| Duodenum | Alfalfa | Positive | development of genitourinary system       | 1.68E-02 | 135 |

|          |         |          |                                          |          |     |
|----------|---------|----------|------------------------------------------|----------|-----|
|          | hay     |          |                                          |          |     |
|          | Alfalfa |          |                                          |          |     |
| Duodenum | hay     | Positive | abnormal morphology of nervous system    | 1.77E-02 | 112 |
|          | Alfalfa |          |                                          |          |     |
| Duodenum | hay     | Positive | cell death of hepatoma cell lines        | 1.80E-02 | 31  |
|          | Alfalfa |          |                                          |          |     |
| Duodenum | hay     | Positive | beta-oxidation of fatty acid             | 1.80E-02 | 17  |
|          | Alfalfa |          |                                          |          |     |
| Duodenum | hay     | Positive | cell movement of fibroblasts             | 1.81E-02 | 33  |
|          | Alfalfa |          |                                          |          |     |
| Duodenum | hay     | Positive | morphology of gonad                      | 1.81E-02 | 62  |
|          | Alfalfa |          |                                          |          |     |
| Duodenum | hay     | Positive | internalization of lipid                 | 1.83E-02 | 8   |
|          | Alfalfa |          |                                          |          |     |
| Duodenum | hay     | Positive | exocytosis                               | 1.86E-02 | 34  |
|          | Alfalfa |          |                                          |          |     |
| Duodenum | hay     | Positive | secretory pathway                        | 1.92E-02 | 35  |
|          | Alfalfa |          |                                          |          |     |
| Duodenum | hay     | Positive | transport of glutamine family amino acid | 1.94E-02 | 13  |
|          | Alfalfa |          |                                          |          |     |
| Duodenum | hay     | Positive | ubiquitination of protein                | 1.94E-02 | 55  |
|          | Alfalfa |          |                                          |          |     |
| Duodenum | hay     | Positive | phosphorylation of protein               | 2.06E-02 | 113 |
|          | Alfalfa |          |                                          |          |     |
| Duodenum | hay     | Positive | angiosarcoma                             | 2.08E-02 | 16  |
|          | Alfalfa |          |                                          |          |     |
| Duodenum | hay     | Positive | apoptosis of hepatoma cell lines         | 2.08E-02 | 28  |
|          | Alfalfa |          |                                          |          |     |
| Duodenum | hay     | Positive | cell cycle progression                   | 2.17E-02 | 156 |
|          | Alfalfa |          |                                          |          |     |
| Duodenum | hay     | Positive | formation of lymphocytes                 | 2.17E-02 | 24  |
|          | Alfalfa |          |                                          |          |     |
| Duodenum | hay     | Positive | morphology of bone                       | 2.21E-02 | 72  |
|          | Alfalfa |          |                                          |          |     |
| Duodenum | hay     | Positive | activation of JUN kinase                 | 2.22E-02 | 11  |
|          | Alfalfa |          |                                          |          |     |
| Duodenum | hay     | Positive | activation of enzyme                     | 2.22E-02 | 63  |
|          | Alfalfa |          |                                          |          |     |
| Duodenum | hay     | Positive | survival of vascular endothelial cells   | 2.24E-02 | 10  |
|          | Alfalfa |          |                                          |          |     |
| Duodenum | hay     | Positive | congenital malformation of face          | 2.24E-02 | 28  |
|          | Alfalfa |          |                                          |          |     |
| Duodenum | hay     | Positive | septic shock                             | 2.24E-02 | 28  |
| Duodenum | Alfalfa | Positive | morphology of vessel                     | 2.25E-02 | 51  |

|          |         |          |                                                  |          |    |
|----------|---------|----------|--------------------------------------------------|----------|----|
|          | hay     |          |                                                  |          |    |
|          | Alfalfa |          |                                                  |          |    |
| Duodenum | hay     | Positive | apoptosis of cerebral cortex cells               | 2.26E-02 | 21 |
|          | Alfalfa |          |                                                  |          |    |
| Duodenum | hay     | Positive | cyclopia                                         | 2.26E-02 | 6  |
|          | Alfalfa |          |                                                  |          |    |
| Duodenum | hay     | Positive | morphology of vasculature                        | 2.27E-02 | 30 |
|          | Alfalfa |          |                                                  |          |    |
| Duodenum | hay     | Positive | cell death of smooth muscle cells                | 2.29E-02 | 22 |
|          | Alfalfa |          |                                                  |          |    |
| Duodenum | hay     | Positive | apoptosis of fibroblast cell lines               | 2.38E-02 | 54 |
|          | Alfalfa |          |                                                  |          |    |
| Duodenum | hay     | Positive | oxidation of lipid                               | 2.39E-02 | 37 |
|          | Alfalfa |          |                                                  |          |    |
| Duodenum | hay     | Positive | proliferation of keratinocytes                   | 2.39E-02 | 28 |
|          | Alfalfa |          |                                                  |          |    |
| Duodenum | hay     | Positive | morphology of genital organ                      | 2.39E-02 | 68 |
|          | Alfalfa |          |                                                  |          |    |
| Duodenum | hay     | Positive | frequency of malignant tumor                     | 2.41E-02 | 5  |
|          | Alfalfa |          |                                                  |          |    |
| Duodenum | hay     | Positive | apoptosis of breast cancer cell lines            | 2.41E-02 | 48 |
|          | Alfalfa |          |                                                  |          |    |
| Duodenum | hay     | Positive | development of digestive system                  | 2.42E-02 | 62 |
|          | Alfalfa |          |                                                  |          |    |
| Duodenum | hay     | Positive | S phase                                          | 2.46E-02 | 44 |
|          | Alfalfa |          |                                                  |          |    |
| Duodenum | hay     | Positive | frequency of tumor                               | 2.47E-02 | 7  |
|          | Alfalfa |          |                                                  |          |    |
| Duodenum | hay     | Positive | cell movement of lung cancer cell lines          | 2.50E-02 | 22 |
|          | Alfalfa |          |                                                  |          |    |
| Duodenum | hay     | Positive | quantity of lymphatic system component           | 2.59E-02 | 61 |
|          | Alfalfa |          |                                                  |          |    |
| Duodenum | hay     | Positive | S phase of fibroblast cell lines                 | 2.59E-02 | 13 |
|          | Alfalfa |          |                                                  |          |    |
| Duodenum | hay     | Positive | arrest in proliferation of fibroblast cell lines | 2.59E-02 | 11 |
|          | Alfalfa |          |                                                  |          |    |
| Duodenum | hay     | Positive | high bone mass disease                           | 2.60E-02 | 16 |
|          | Alfalfa |          |                                                  |          |    |
| Duodenum | hay     | Positive | shape change of epithelial cell lines            | 2.62E-02 | 9  |
|          | Alfalfa |          |                                                  |          |    |
| Duodenum | hay     | Positive | polyarticular juvenile rheumatoid arthritis      | 2.69E-02 | 18 |
|          | Alfalfa |          |                                                  |          |    |
| Duodenum | hay     | Positive | cell death of muscle                             | 2.73E-02 | 56 |
| Duodenum | Alfalfa | Positive | apoptosis of embryonic cell lines                | 2.77E-02 | 32 |

|          |         |          |                                                 |          |     |
|----------|---------|----------|-------------------------------------------------|----------|-----|
|          | hay     |          |                                                 |          |     |
|          | Alfalfa |          |                                                 |          |     |
| Duodenum | hay     | Positive | proliferation of cervical cancer cell lines     | 2.77E-02 | 35  |
|          | Alfalfa |          |                                                 |          |     |
| Duodenum | hay     | Positive | congenital anomaly of musculoskeletal system    | 2.78E-02 | 112 |
|          | Alfalfa |          |                                                 |          |     |
| Duodenum | hay     | Positive | cell movement of connective tissue cells        | 2.88E-02 | 38  |
|          | Alfalfa |          |                                                 |          |     |
| Duodenum | hay     | Positive | cell movement of neutrophils                    | 2.91E-02 | 49  |
|          | Alfalfa |          |                                                 |          |     |
| Duodenum | hay     | Positive | bleeding of tissue                              | 3.01E-02 | 13  |
|          | Alfalfa |          |                                                 |          |     |
| Duodenum | hay     | Positive | formation of T lymphocytes                      | 3.01E-02 | 22  |
|          | Alfalfa |          |                                                 |          |     |
| Duodenum | hay     | Positive | aggregation of cells                            | 3.02E-02 | 53  |
|          | Alfalfa |          |                                                 |          |     |
| Duodenum | hay     | Positive | transport of L-amino acid                       | 3.04E-02 | 14  |
|          | Alfalfa |          |                                                 |          |     |
| Duodenum | hay     | Positive | entry into S phase of fibroblast cell lines     | 3.04E-02 | 8   |
|          | Alfalfa |          |                                                 |          |     |
| Duodenum | hay     | Positive | apoptosis of neurons                            | 3.05E-02 | 69  |
|          | Alfalfa |          |                                                 |          |     |
| Duodenum | hay     | Positive | cell death of melanoma cell lines               | 3.05E-02 | 42  |
|          | Alfalfa |          |                                                 |          |     |
| Duodenum | hay     | Positive | metabolism of membrane lipid derivative         | 3.10E-02 | 62  |
|          | Alfalfa |          |                                                 |          |     |
| Duodenum | hay     | Positive | sensitivity of cells                            | 3.11E-02 | 26  |
|          | Alfalfa |          |                                                 |          |     |
| Duodenum | hay     | Positive | cell death of stem cells                        | 3.14E-02 | 17  |
|          | Alfalfa |          |                                                 |          |     |
| Duodenum | hay     | Positive | abnormal morphology of bone                     | 3.15E-02 | 69  |
|          | Alfalfa |          |                                                 |          |     |
| Duodenum | hay     | Positive | cell movement of endothelial cells              | 3.17E-02 | 57  |
|          | Alfalfa |          |                                                 |          |     |
| Duodenum | hay     | Positive | autophagy of cells                              | 3.17E-02 | 44  |
|          | Alfalfa |          |                                                 |          |     |
| Duodenum | hay     | Positive | quantity of type II pneumocytes                 | 3.20E-02 | 6   |
|          | Alfalfa |          |                                                 |          |     |
| Duodenum | hay     | Positive | frequency of thymic lymphoma                    | 3.20E-02 | 3   |
|          | Alfalfa |          |                                                 |          |     |
| Duodenum | hay     | Positive | structural integrity of intercellular junctions | 3.20E-02 | 3   |
|          | Alfalfa |          |                                                 |          |     |
| Duodenum | hay     | Positive | juvenile rheumatoid arthritis                   | 3.20E-02 | 23  |
| Duodenum | Alfalfa | Positive | cellular infiltration of phagocytes             | 3.20E-02 | 31  |

|          |         |          |                                                  |          |    |
|----------|---------|----------|--------------------------------------------------|----------|----|
|          | hay     |          |                                                  |          |    |
|          | Alfalfa |          |                                                  |          |    |
| Duodenum | hay     | Positive | quantity of reactive oxygen species              | 3.20E-02 | 31 |
|          | Alfalfa |          |                                                  |          |    |
| Duodenum | hay     | Positive | abnormal morphology of second branchial arch     | 3.20E-02 | 7  |
|          | Alfalfa |          |                                                  |          |    |
| Duodenum | hay     | Positive | adhesion of sarcoma cell lines                   | 3.20E-02 | 7  |
|          | Alfalfa |          |                                                  |          |    |
| Duodenum | hay     | Positive | formation of cerebral ventricles                 | 3.20E-02 | 7  |
|          | Alfalfa |          |                                                  |          |    |
| Duodenum | hay     | Positive | fusion of vertebrae                              | 3.20E-02 | 12 |
|          | Alfalfa |          |                                                  |          |    |
| Duodenum | hay     | Positive | congenital anomaly of mouth                      | 3.20E-02 | 29 |
|          | Alfalfa |          |                                                  |          |    |
| Duodenum | hay     | Positive | neurodegeneration of neurites                    | 3.20E-02 | 18 |
|          | Alfalfa |          |                                                  |          |    |
| Duodenum | hay     | Positive | morphology of skin                               | 3.21E-02 | 45 |
|          | Alfalfa |          |                                                  |          |    |
| Duodenum | hay     | Positive | morphology of reproductive system                | 3.22E-02 | 83 |
|          | Alfalfa |          |                                                  |          |    |
| Duodenum | hay     | Positive | apoptosis of fibroblasts                         | 3.25E-02 | 37 |
|          | Alfalfa |          |                                                  |          |    |
| Duodenum | hay     | Positive | transport of alpha-amino acid                    | 3.25E-02 | 15 |
|          | Alfalfa |          |                                                  |          |    |
| Duodenum | hay     | Positive | apoptosis of kidney cell lines                   | 3.25E-02 | 40 |
|          | Alfalfa |          |                                                  |          |    |
| Duodenum | hay     | Positive | fragmentation of DNA fragment                    | 3.25E-02 | 13 |
|          | Alfalfa |          |                                                  |          |    |
| Duodenum | hay     | Positive | cell death of dermal cells                       | 3.25E-02 | 19 |
|          | Alfalfa |          |                                                  |          |    |
| Duodenum | hay     | Positive | abnormal morphology of cervix                    | 3.25E-02 | 4  |
|          | Alfalfa |          |                                                  |          |    |
| Duodenum | hay     | Positive | advanced angiosarcoma                            | 3.25E-02 | 4  |
|          | Alfalfa |          |                                                  |          |    |
| Duodenum | hay     | Positive | elongation of fibroblast cell lines              | 3.25E-02 | 4  |
|          | Alfalfa |          |                                                  |          |    |
| Duodenum | hay     | Positive | extrahepatic bile duct cancer                    | 3.25E-02 | 4  |
|          | Alfalfa |          |                                                  |          |    |
| Duodenum | hay     | Positive | import of L-glutamic acid                        | 3.25E-02 | 4  |
|          | Alfalfa |          |                                                  |          |    |
| Duodenum | hay     | Positive | metastatic triple negative breast adenocarcinoma | 3.25E-02 | 4  |
|          | Alfalfa |          |                                                  |          |    |
| Duodenum | hay     | Positive | resectable gallbladder cancer                    | 3.25E-02 | 4  |
| Duodenum | Alfalfa | Positive | stage 4 HER2 negative hormone receptor           | 3.25E-02 | 4  |

|          |         |          |                                                        |          |     |
|----------|---------|----------|--------------------------------------------------------|----------|-----|
|          | hay     |          | negative breast cancer                                 |          |     |
|          | Alfalfa |          |                                                        |          |     |
| Duodenum | hay     | Positive | stage 4 triple negative breast adenocarcinoma          | 3.25E-02 | 4   |
|          | Alfalfa |          |                                                        |          |     |
| Duodenum | hay     | Positive | unresectable pancreatic cancer                         | 3.25E-02 | 4   |
|          | Alfalfa |          |                                                        |          |     |
| Duodenum | hay     | Positive | cell death of skin                                     | 3.26E-02 | 20  |
|          | Alfalfa |          |                                                        |          |     |
| Duodenum | hay     | Positive | mammary tumor                                          | 3.26E-02 | 234 |
|          | Alfalfa |          |                                                        |          |     |
| Duodenum | hay     | Positive | differentiation of epidermal cells                     | 3.29E-02 | 29  |
|          | Alfalfa |          |                                                        |          |     |
| Duodenum | hay     | Positive | dendritic growth/branching                             | 3.33E-02 | 37  |
|          | Alfalfa |          |                                                        |          |     |
| Duodenum | hay     | Positive | growth of organism                                     | 3.35E-02 | 125 |
|          | Alfalfa |          |                                                        |          |     |
| Duodenum | hay     | Positive | differentiation of blood cells                         | 3.41E-02 | 126 |
|          | Alfalfa |          |                                                        |          |     |
| Duodenum | hay     | Positive | intermediate disease stage peripheral arterial disease | 3.41E-02 | 28  |
|          | Alfalfa |          |                                                        |          |     |
| Duodenum | hay     | Positive | cell death of muscle cells                             | 3.41E-02 | 54  |
|          | Alfalfa |          |                                                        |          |     |
| Duodenum | hay     | Positive | breast or colorectal cancer                            | 3.42E-02 | 670 |
|          | Alfalfa |          |                                                        |          |     |
| Duodenum | hay     | Positive | generation of reactive oxygen species                  | 3.47E-02 | 35  |
|          | Alfalfa |          |                                                        |          |     |
| Duodenum | hay     | Positive | necrosis of muscle                                     | 3.49E-02 | 55  |
|          | Alfalfa |          |                                                        |          |     |
| Duodenum | hay     | Positive | abnormal morphology of skull                           | 3.49E-02 | 37  |
|          | Alfalfa |          |                                                        |          |     |
| Duodenum | hay     | Positive | oligomerization of protein                             | 3.49E-02 | 40  |
|          | Alfalfa |          |                                                        |          |     |
| Duodenum | hay     | Positive | grasping                                               | 3.49E-02 | 15  |
|          | Alfalfa |          |                                                        |          |     |
| Duodenum | hay     | Positive | abnormal quantity of fatty acid                        | 3.49E-02 | 8   |
|          | Alfalfa |          |                                                        |          |     |
| Duodenum | hay     | Positive | hydrolysis of nucleotide                               | 3.49E-02 | 23  |
|          | Alfalfa |          |                                                        |          |     |
| Duodenum | hay     | Positive | metabolism of carnitine                                | 3.49E-02 | 5   |
|          | Alfalfa |          |                                                        |          |     |
| Duodenum | hay     | Positive | secretion of alpha granules                            | 3.49E-02 | 5   |
|          | Alfalfa |          |                                                        |          |     |
| Duodenum | hay     | Positive | formation of thymocytes                                | 3.49E-02 | 20  |
| Duodenum | Alfalfa | Positive | internalization by tumor cell lines                    | 3.50E-02 | 22  |

|          |         |          |                                              |          |    |
|----------|---------|----------|----------------------------------------------|----------|----|
|          | hay     |          |                                              |          |    |
|          | Alfalfa |          |                                              |          |    |
| Duodenum | hay     | Positive | interphase of fibroblast cell lines          | 3.50E-02 | 22 |
|          | Alfalfa |          |                                              |          |    |
| Duodenum | hay     | Positive | Shock Response                               | 3.54E-02 | 30 |
|          | Alfalfa |          |                                              |          |    |
| Duodenum | hay     | Positive | formation of leukocytes                      | 3.57E-02 | 28 |
|          | Alfalfa |          |                                              |          |    |
| Duodenum | hay     | Positive | abnormal morphology of gonad                 | 3.64E-02 | 58 |
|          | Alfalfa |          |                                              |          |    |
| Duodenum | hay     | Positive | catabolism of protein                        | 3.69E-02 | 92 |
|          | Alfalfa |          |                                              |          |    |
| Duodenum | hay     | Positive | internalization of cells                     | 3.69E-02 | 29 |
|          | Alfalfa |          |                                              |          |    |
| Duodenum | hay     | Positive | apoptosis of muscle                          | 3.77E-02 | 43 |
|          | Alfalfa |          |                                              |          |    |
| Duodenum | hay     | Positive | homing of blood cells                        | 3.77E-02 | 60 |
|          | Alfalfa |          |                                              |          |    |
| Duodenum | hay     | Positive | morphology of blood vessel                   | 3.83E-02 | 46 |
|          | Alfalfa |          |                                              |          |    |
| Duodenum | hay     | Positive | leukocytosis                                 | 3.83E-02 | 21 |
|          | Alfalfa |          |                                              |          |    |
| Duodenum | hay     | Positive | cell viability of cervical cancer cell lines | 3.86E-02 | 37 |
|          | Alfalfa |          |                                              |          |    |
| Duodenum | hay     | Positive | protein kinase cascade                       | 3.91E-02 | 66 |
|          | Alfalfa |          |                                              |          |    |
| Duodenum | hay     | Positive | adhesion of lung cancer cell lines           | 3.93E-02 | 7  |
|          | Alfalfa |          |                                              |          |    |
| Duodenum | hay     | Positive | dephosphorylation of protein                 | 3.93E-02 | 32 |
|          | Alfalfa |          |                                              |          |    |
| Duodenum | hay     | Positive | mitosis of tumor cell lines                  | 4.01E-02 | 24 |
|          | Alfalfa |          |                                              |          |    |
| Duodenum | hay     | Positive | differentiation of smooth muscle             | 4.01E-02 | 14 |
|          | Alfalfa |          |                                              |          |    |
| Duodenum | hay     | Positive | dilation of heart ventricle                  | 4.01E-02 | 12 |
|          | Alfalfa |          |                                              |          |    |
| Duodenum | hay     | Positive | differentiation of epithelial tissue         | 4.03E-02 | 57 |
|          | Alfalfa |          |                                              |          |    |
| Duodenum | hay     | Positive | mass of genitourinary system                 | 4.05E-02 | 48 |
|          | Alfalfa |          |                                              |          |    |
| Duodenum | hay     | Positive | quantity of D-sphingosine                    | 4.05E-02 | 6  |
|          | Alfalfa |          |                                              |          |    |
| Duodenum | hay     | Positive | tubulogenesis of endothelial cells           | 4.05E-02 | 6  |
| Duodenum | Alfalfa | Positive | abnormal morphology of vasculature           | 4.06E-02 | 28 |

|          |         |          |                                           |          |     |
|----------|---------|----------|-------------------------------------------|----------|-----|
|          | hay     |          |                                           |          |     |
|          | Alfalfa |          |                                           |          |     |
| Duodenum | hay     | Positive | migration of connective tissue cells      | 4.07E-02 | 31  |
|          | Alfalfa |          |                                           |          |     |
| Duodenum | hay     | Positive | polarization of tumor cell lines          | 4.12E-02 | 10  |
|          | Alfalfa |          |                                           |          |     |
| Duodenum | hay     | Positive | interphase                                | 4.27E-02 | 99  |
|          | Alfalfa |          |                                           |          |     |
| Duodenum | hay     | Positive | transport of amino acids                  | 4.30E-02 | 24  |
|          | Alfalfa |          |                                           |          |     |
| Duodenum | hay     | Positive | morphology of second branchial arch       | 4.30E-02 | 8   |
|          | Alfalfa |          |                                           |          |     |
| Duodenum | hay     | Positive | transport of L-glutamic acid              | 4.30E-02 | 8   |
|          | Alfalfa |          |                                           |          |     |
| Duodenum | hay     | Positive | oxidative stress                          | 4.32E-02 | 15  |
|          | Alfalfa |          |                                           |          |     |
| Duodenum | hay     | Positive | metabolism of carbohydrate                | 4.33E-02 | 94  |
|          | Alfalfa |          |                                           |          |     |
| Duodenum | hay     | Positive | movement of vascular endothelial cells    | 4.33E-02 | 31  |
|          | Alfalfa |          |                                           |          |     |
| Duodenum | hay     | Positive | cell movement of epithelial cells         | 4.34E-02 | 26  |
|          | Alfalfa |          |                                           |          |     |
| Duodenum | hay     | Positive | accumulation of lipid                     | 4.41E-02 | 48  |
|          | Alfalfa |          |                                           |          |     |
| Duodenum | hay     | Positive | apoptosis of retinal cells                | 4.43E-02 | 11  |
|          | Alfalfa |          |                                           |          |     |
| Duodenum | hay     | Positive | chemotaxis of leukocytes                  | 4.43E-02 | 56  |
|          | Alfalfa |          |                                           |          |     |
| Duodenum | hay     | Positive | development of antigen presenting cells   | 4.45E-02 | 14  |
|          | Alfalfa |          |                                           |          |     |
| Duodenum | hay     | Positive | abnormal morphology of pulmonary alveolus | 4.45E-02 | 21  |
|          | Alfalfa |          |                                           |          |     |
| Duodenum | hay     | Positive | chemotaxis of myeloid cells               | 4.45E-02 | 47  |
|          | Alfalfa |          |                                           |          |     |
| Duodenum | hay     | Positive | formation of focal adhesions              | 4.46E-02 | 27  |
|          | Alfalfa |          |                                           |          |     |
| Duodenum | hay     | Positive | benign neoplasia                          | 4.47E-02 | 136 |
|          | Alfalfa |          |                                           |          |     |
| Duodenum | hay     | Positive | differentiation of leukocytes             | 4.47E-02 | 101 |
|          | Alfalfa |          |                                           |          |     |
| Duodenum | hay     | Positive | death of perinatal stage organism         | 4.47E-02 | 16  |
|          | Alfalfa |          |                                           |          |     |
| Duodenum | hay     | Positive | formation of microtubules                 | 4.47E-02 | 16  |
| Duodenum | Alfalfa | Positive | oxidative stress response of cells        | 4.47E-02 | 13  |



|          |         |          |                                            |          |     |
|----------|---------|----------|--------------------------------------------|----------|-----|
|          | hay     |          |                                            |          |     |
|          | Alfalfa |          |                                            |          |     |
| Duodenum | hay     | Positive | quantity of subcutaneous fat               | 4.47E-02 | 13  |
|          | Alfalfa |          |                                            |          |     |
| Duodenum | hay     | Positive | abnormal morphology of dorsal aorta        | 4.47E-02 | 12  |
|          | Alfalfa |          |                                            |          |     |
| Duodenum | hay     | Positive | learning                                   | 4.51E-02 | 65  |
|          | Alfalfa |          |                                            |          |     |
| Duodenum | hay     | Positive | abnormal morphology of heart               | 4.63E-02 | 60  |
|          | Alfalfa |          |                                            |          |     |
| Duodenum | hay     | Positive | development of epithelial tissue           | 4.64E-02 | 79  |
|          | Alfalfa |          |                                            |          |     |
| Duodenum | hay     | Positive | hypoplasia of organ                        | 4.65E-02 | 69  |
|          | Alfalfa |          |                                            |          |     |
| Duodenum | hay     | Positive | abnormal morphology of blood vessel        | 4.66E-02 | 43  |
|          | Alfalfa |          |                                            |          |     |
| Duodenum | hay     | Positive | homing of leukocytes                       | 4.73E-02 | 59  |
|          | Alfalfa |          |                                            |          |     |
| Duodenum | hay     | Positive | abnormal quantity of leukocytes            | 4.73E-02 | 18  |
|          | Alfalfa |          |                                            |          |     |
| Duodenum | hay     | Positive | transport of acidic amino acid             | 4.73E-02 | 10  |
|          | Alfalfa |          |                                            |          |     |
| Duodenum | hay     | Positive | migration of endothelial cells             | 4.73E-02 | 52  |
|          | Alfalfa |          |                                            |          |     |
| Duodenum | hay     | Positive | mitosis                                    | 4.73E-02 | 76  |
|          | Alfalfa |          |                                            |          |     |
| Duodenum | hay     | Positive | cell viability of fibroblast cell lines    | 4.73E-02 | 21  |
|          | Alfalfa |          |                                            |          |     |
| Duodenum | hay     | Positive | abnormal morphology of abdomen             | 4.74E-02 | 129 |
|          | Alfalfa |          |                                            |          |     |
| Duodenum | hay     | Positive | apoptosis of smooth muscle cells           | 4.76E-02 | 20  |
|          | Alfalfa |          |                                            |          |     |
| Duodenum | hay     | Positive | cognition                                  | 4.79E-02 | 70  |
|          | Alfalfa |          |                                            |          |     |
| Duodenum | hay     | Positive | morphology of cerebral neocortex           | 4.81E-02 | 7   |
|          | Alfalfa |          |                                            |          |     |
| Duodenum | hay     | Positive | proliferation of embryonic stem cell lines | 4.81E-02 | 7   |
|          | Alfalfa |          |                                            |          |     |
| Duodenum | hay     | Positive | transport of monocarboxylic acid           | 4.81E-02 | 7   |
|          | Alfalfa |          |                                            |          |     |
| Duodenum | hay     | Positive | metabolism of DNA                          | 4.82E-02 | 62  |
|          | Alfalfa |          |                                            |          |     |
| Duodenum | hay     | Positive | recruitment of cells                       | 4.82E-02 | 56  |
| Duodenum | Alfalfa | Positive | growth of skin                             | 4.82E-02 | 36  |

|          |         |          |                                         |          |    |
|----------|---------|----------|-----------------------------------------|----------|----|
|          | hay     |          |                                         |          |    |
|          | Alfalfa |          |                                         |          |    |
| Duodenum | hay     | Positive | cell viability of cerebral cortex cells | 4.82E-02 | 14 |
|          | Alfalfa |          |                                         |          |    |
| Duodenum | hay     | Positive | organization of actin cytoskeleton      | 4.83E-02 | 48 |
|          | Alfalfa |          |                                         |          |    |
| Duodenum | hay     | Positive | morphology of astrocytes                | 4.87E-02 | 11 |
|          | Alfalfa |          |                                         |          |    |
| Duodenum | hay     | Positive | remodeling of embryonic tissue          | 4.87E-02 | 11 |
|          | Alfalfa |          |                                         |          |    |
| Duodenum | hay     | Positive | cell spreading of dermal cells          | 4.87E-02 | 5  |
|          | Alfalfa |          |                                         |          |    |
| Duodenum | hay     | Positive | import of lipid                         | 4.87E-02 | 5  |
|          | Alfalfa |          |                                         |          |    |
| Duodenum | hay     | Positive | locally advanced adenocarcinoma         | 4.87E-02 | 5  |
|          | Alfalfa |          |                                         |          |    |
| Duodenum | hay     | Positive | quantity of carnitine                   | 4.87E-02 | 5  |
|          | Alfalfa |          |                                         |          |    |
| Duodenum | hay     | Positive | synthesis of GABA                       | 4.87E-02 | 5  |
|          | Alfalfa |          |                                         |          |    |
| Duodenum | hay     | Positive | vascularization of hindlimb             | 4.87E-02 | 5  |
|          | Alfalfa |          |                                         |          |    |
| Duodenum | hay     | Positive | apoptosis of brain cells                | 4.87E-02 | 25 |
|          | Alfalfa |          |                                         |          |    |
| Duodenum | hay     | Positive | migration of fibroblasts                | 4.87E-02 | 25 |
|          | Alfalfa |          |                                         |          |    |
| Duodenum | hay     | Positive | contraction of muscle cells             | 4.91E-02 | 12 |
|          | Alfalfa |          |                                         |          |    |
| Duodenum | hay     | Positive | development of face                     | 4.91E-02 | 12 |
|          | Alfalfa |          |                                         |          |    |
| Duodenum | hay     | Positive | morphology of right ventricle           | 4.91E-02 | 12 |
|          | Alfalfa |          |                                         |          |    |
| Duodenum | hay     | Positive | quantity of lung cells                  | 4.95E-02 | 8  |
|          | Alfalfa |          |                                         |          |    |
| Duodenum | hay     | Positive | synthesis of heme                       | 4.95E-02 | 8  |
|          | Alfalfa |          |                                         |          |    |
| Duodenum | hay     | Positive | apoptosis of muscle cells               | 4.97E-02 | 42 |
|          | Alfalfa |          |                                         |          |    |
| Duodenum | hay     | Positive | gluconeogenesis                         | 4.98E-02 | 18 |
|          | Alfalfa |          |                                         |          |    |
| Duodenum | hay     | Positive | formation of embryonic tissue           | 5.04E-02 | 47 |
|          | Alfalfa |          |                                         |          |    |
| Duodenum | hay     | Positive | Zellweger syndrome                      | 5.10E-02 | 6  |
| Duodenum | Alfalfa | Positive | cell spreading of epithelial cells      | 5.10E-02 | 6  |

|          |         |          |                                                |          |    |
|----------|---------|----------|------------------------------------------------|----------|----|
|          | hay     |          |                                                |          |    |
|          | Alfalfa |          |                                                |          |    |
| Duodenum | hay     | Positive | differentiation of muscle                      | 5.17E-02 | 48 |
|          | Alfalfa |          |                                                |          |    |
| Duodenum | hay     | Positive | aggregation of blood platelets                 | 5.20E-02 | 32 |
|          | Alfalfa |          |                                                |          |    |
| Duodenum | hay     | Positive | morphogenesis of axons                         | 5.20E-02 | 16 |
|          | Alfalfa |          |                                                |          |    |
| Duodenum | hay     | Positive | adhesion of fibrosarcoma cell lines            | 5.20E-02 | 4  |
|          | Alfalfa |          |                                                |          |    |
| Duodenum | hay     | Positive | advanced stage biliary tract cancer            | 5.20E-02 | 4  |
|          | Alfalfa |          | antineutrophil cytoplasmic antibody-associated |          |    |
| Duodenum | hay     | Positive | vasculitis                                     | 5.20E-02 | 4  |
|          | Alfalfa |          |                                                |          |    |
| Duodenum | hay     | Positive | generation of plasma membrane projections      | 5.20E-02 | 4  |
|          | Alfalfa |          |                                                |          |    |
| Duodenum | hay     | Positive | locally advanced pancreatic adenocarcinoma     | 5.20E-02 | 4  |
|          | Alfalfa |          |                                                |          |    |
| Duodenum | hay     | Positive | morphology of thyroid tumor cell lines         | 5.20E-02 | 4  |
|          | Alfalfa |          |                                                |          |    |
| Duodenum | hay     | Positive | pyknosis                                       | 5.20E-02 | 4  |
|          | Alfalfa |          |                                                |          |    |
| Duodenum | hay     | Positive | synthesis of pyrimidine ribonucleotide         | 5.20E-02 | 4  |
|          | Alfalfa |          |                                                |          |    |
| Duodenum | hay     | Positive | unresectable pancreatic adenocarcinoma         | 5.20E-02 | 4  |
|          | Alfalfa |          |                                                |          |    |
| Duodenum | hay     | Positive | cell death of kidney cancer cell lines         | 5.25E-02 | 10 |
|          | Alfalfa |          |                                                |          |    |
| Duodenum | hay     | Positive | abnormal morphology of artery                  | 5.27E-02 | 26 |
|          | Alfalfa |          |                                                |          |    |
| Duodenum | hay     | Positive | differentiation of keratinocytes               | 5.27E-02 | 26 |
|          | Alfalfa |          |                                                |          |    |
| Duodenum | hay     | Positive | mental retardation                             | 5.36E-02 | 38 |
|          | Alfalfa |          |                                                |          |    |
| Duodenum | hay     | Positive | synthesis of terpenoid                         | 5.37E-02 | 45 |
|          | Alfalfa |          |                                                |          |    |
| Duodenum | hay     | Positive | abnormal morphology of genital organ           | 5.39E-02 | 63 |
|          | Alfalfa |          |                                                |          |    |
| Duodenum | hay     | Positive | spinocerebellar disease                        | 5.44E-02 | 23 |
|          | Alfalfa |          |                                                |          |    |
| Duodenum | hay     | Positive | formation of centrosome                        | 5.45E-02 | 12 |
|          | Alfalfa |          |                                                |          |    |
| Duodenum | hay     | Positive | involution                                     | 5.45E-02 | 12 |
| Duodenum | Alfalfa | Positive | neurodegeneration of cerebral cortex           | 5.45E-02 | 12 |

|          |         |          |                                                 |          |    |
|----------|---------|----------|-------------------------------------------------|----------|----|
|          | hay     |          |                                                 |          |    |
|          | Alfalfa |          |                                                 |          |    |
| Duodenum | hay     | Positive | tubulogenesis                                   | 5.45E-02 | 12 |
|          | Alfalfa |          |                                                 |          |    |
| Duodenum | hay     | Positive | uptake of monosaccharide                        | 5.53E-02 | 43 |
|          | Alfalfa |          |                                                 |          |    |
| Duodenum | hay     | Positive | homing of tumor cell lines                      | 5.63E-02 | 26 |
|          | Alfalfa |          |                                                 |          |    |
| Duodenum | hay     | Positive | contraction of cardiomyocytes                   | 5.66E-02 | 9  |
|          | Alfalfa |          |                                                 |          |    |
| Duodenum | hay     | Positive | epithelial-mesenchymal transition               | 5.77E-02 | 34 |
|          | Alfalfa |          |                                                 |          |    |
| Duodenum | hay     | Positive | quantity of alveolar epithelium                 | 5.79E-02 | 7  |
|          | Alfalfa |          |                                                 |          |    |
| Duodenum | hay     | Positive | quantity of pneumocytes                         | 5.79E-02 | 7  |
|          | Alfalfa |          |                                                 |          |    |
| Duodenum | hay     | Positive | degeneration of central nervous system          | 5.86E-02 | 23 |
|          | Alfalfa |          |                                                 |          |    |
| Duodenum | hay     | Positive | endotoxemia                                     | 5.86E-02 | 18 |
|          | Alfalfa |          |                                                 |          |    |
| Duodenum | hay     | Positive | abnormal morphology of first branchial arch     | 5.88E-02 | 8  |
|          | Alfalfa |          |                                                 |          |    |
| Duodenum | hay     | Positive | permeability of cellular membrane               | 5.88E-02 | 8  |
|          | Alfalfa |          |                                                 |          |    |
| Duodenum | hay     | Positive | thrombosis of artery                            | 5.88E-02 | 8  |
|          | Alfalfa |          |                                                 |          |    |
| Duodenum | hay     | Positive | development of central nervous system           | 5.88E-02 | 95 |
|          | Alfalfa |          |                                                 |          |    |
| Duodenum | hay     | Positive | osteopetrosis                                   | 6.03E-02 | 13 |
|          | Alfalfa |          |                                                 |          |    |
| Duodenum | hay     | Positive | transmembrane potential of mitochondria         | 6.03E-02 | 35 |
|          | Alfalfa |          |                                                 |          |    |
| Duodenum | hay     | Positive | function of muscle                              | 6.15E-02 | 54 |
|          | Alfalfa |          |                                                 |          |    |
| Duodenum | hay     | Positive | migration of vascular endothelial cells         | 6.27E-02 | 28 |
|          | Alfalfa |          |                                                 |          |    |
| Duodenum | hay     | Positive | organization of fibrils                         | 6.27E-02 | 11 |
|          | Alfalfa |          | epithelial-mesenchymal transition of tumor cell |          |    |
| Duodenum | hay     | Positive | lines                                           | 6.29E-02 | 20 |
|          | Alfalfa |          |                                                 |          |    |
| Duodenum | hay     | Positive | dysgenesis                                      | 6.33E-02 | 81 |
|          | Alfalfa |          |                                                 |          |    |
| Duodenum | hay     | Positive | morphology of testis                            | 6.34E-02 | 43 |
| Duodenum | Alfalfa | Positive | shape change of axons                           | 6.34E-02 | 17 |

|          |         |          |                                         |          |      |
|----------|---------|----------|-----------------------------------------|----------|------|
|          | hay     |          |                                         |          |      |
|          | Alfalfa |          |                                         |          |      |
| Duodenum | hay     | Positive | differentiation of skin                 | 6.34E-02 | 30   |
|          | Alfalfa |          |                                         |          |      |
| Duodenum | hay     | Positive | apoptosis of vascular endothelial cells | 6.34E-02 | 18   |
|          | Alfalfa |          |                                         |          |      |
| Duodenum | hay     | Positive | mitosis of cervical cancer cell lines   | 6.34E-02 | 18   |
|          | Alfalfa |          |                                         |          |      |
| Duodenum | hay     | Positive | differentiation of epithelial cells     | 6.34E-02 | 49   |
|          | Alfalfa |          |                                         |          |      |
| Duodenum | hay     | Positive | development of urinary tract            | 6.34E-02 | 45   |
|          | Alfalfa |          |                                         |          |      |
| Duodenum | hay     | Positive | morphology of lung                      | 6.34E-02 | 31   |
|          | Alfalfa |          |                                         |          |      |
| Duodenum | hay     | Positive | abnormal morphology of skin             | 6.37E-02 | 39   |
|          | Alfalfa |          |                                         |          |      |
| Duodenum | hay     | Positive | abnormal morphology of branchial arch   | 6.37E-02 | 14   |
|          | Alfalfa |          |                                         |          |      |
| Duodenum | hay     | Positive | uptake of amino acids                   | 6.37E-02 | 14   |
|          | Alfalfa |          |                                         |          |      |
| Duodenum | hay     | Positive | Cytosis                                 | 6.44E-02 | 50   |
|          | Alfalfa |          |                                         |          |      |
| Duodenum | hay     | Positive | respiratory system development          | 6.46E-02 | 53   |
|          | Alfalfa |          |                                         |          |      |
| Duodenum | hay     | Positive | advanced soft tissue sarcoma            | 6.46E-02 | 6    |
|          | Alfalfa |          |                                         |          |      |
| Duodenum | hay     | Positive | metabolism of ceramide                  | 6.46E-02 | 6    |
|          | Alfalfa |          |                                         |          |      |
| Duodenum | hay     | Positive | relapsed chronic lymphocytic leukemia   | 6.46E-02 | 6    |
|          | Alfalfa |          |                                         |          |      |
| Duodenum | hay     | Positive | Hypoplasia                              | 6.46E-02 | 76   |
|          | Alfalfa |          |                                         |          |      |
| Duodenum | hay     | Positive | polymerization of protein               | 6.48E-02 | 57   |
|          | Alfalfa |          |                                         |          |      |
| Duodenum | hay     | Negative | proliferation of cells                  | 1.89E-60 | 1791 |
|          | Alfalfa |          |                                         |          |      |
| Duodenum | hay     | Negative | cancer                                  | 2.67E-48 | 4440 |
|          | Alfalfa |          |                                         |          |      |
| Duodenum | hay     | Negative | cell death                              | 1.08E-47 | 1594 |
|          | Alfalfa |          |                                         |          |      |
| Duodenum | hay     | Negative | organismal death                        | 3.83E-47 | 1202 |
|          | Alfalfa |          |                                         |          |      |
| Duodenum | hay     | Negative | malignant solid tumor                   | 7.56E-47 | 4386 |
| Duodenum | Alfalfa | Negative | morbidity or mortality                  | 7.56E-47 | 1214 |

|          |         |          |                                   |          |      |
|----------|---------|----------|-----------------------------------|----------|------|
|          | hay     |          |                                   |          |      |
|          | Alfalfa |          |                                   |          |      |
| Duodenum | hay     | Negative | apoptosis                         | 3.06E-38 | 1269 |
|          | Alfalfa |          |                                   |          |      |
| Duodenum | hay     | Negative | morphology of cells               | 8.33E-37 | 972  |
|          | Alfalfa |          |                                   |          |      |
| Duodenum | hay     | Negative | necrosis                          | 1.60E-36 | 1232 |
|          | Alfalfa |          |                                   |          |      |
| Duodenum | hay     | Negative | cell movement                     | 3.82E-35 | 1042 |
|          | Alfalfa |          |                                   |          |      |
| Duodenum | hay     | Negative | organization of cytoplasm         | 2.03E-33 | 782  |
|          | Alfalfa |          |                                   |          |      |
| Duodenum | hay     | Negative | organization of cytoskeleton      | 6.84E-28 | 702  |
|          | Alfalfa |          |                                   |          |      |
| Duodenum | hay     | Negative | transport of molecule             | 1.66E-27 | 793  |
|          | Alfalfa |          |                                   |          |      |
| Duodenum | hay     | Negative | tumorigenesis of tissue           | 1.24E-26 | 3671 |
|          | Alfalfa |          |                                   |          |      |
| Duodenum | hay     | Negative | differentiation of cells          | 2.19E-26 | 1054 |
|          | Alfalfa |          |                                   |          |      |
| Duodenum | hay     | Negative | neoplasia of epithelial tissue    | 5.09E-26 | 3612 |
|          | Alfalfa |          |                                   |          |      |
| Duodenum | hay     | Negative | migration of cells                | 2.74E-25 | 905  |
|          | Alfalfa |          |                                   |          |      |
| Duodenum | hay     | Negative | epithelial cancer                 | 5.56E-25 | 3574 |
|          | Alfalfa |          |                                   |          |      |
| Duodenum | hay     | Negative | abdominal neoplasm                | 7.90E-24 | 3573 |
|          | Alfalfa |          |                                   |          |      |
| Duodenum | hay     | Negative | quantity of cells                 | 8.17E-24 | 842  |
|          | Alfalfa |          |                                   |          |      |
| Duodenum | hay     | Negative | expression of RNA                 | 3.44E-23 | 995  |
|          | Alfalfa |          |                                   |          |      |
| Duodenum | hay     | Negative | abdominal cancer                  | 1.55E-22 | 3526 |
|          | Alfalfa |          |                                   |          |      |
| Duodenum | hay     | Negative | microtubule dynamics              | 5.96E-22 | 587  |
|          | Alfalfa |          |                                   |          |      |
| Duodenum | hay     | Negative | transcription                     | 7.18E-22 | 926  |
|          | Alfalfa |          |                                   |          |      |
| Duodenum | hay     | Negative | cellular homeostasis              | 1.07E-21 | 729  |
|          | Alfalfa |          |                                   |          |      |
| Duodenum | hay     | Negative | angiogenesis                      | 9.39E-21 | 462  |
|          | Alfalfa |          |                                   |          |      |
| Duodenum | hay     | Negative | cell movement of tumor cell lines | 2.35E-20 | 436  |
| Duodenum | Alfalfa | Negative | Movement Disorders                | 3.84E-20 | 526  |

|          |         |          |                                     |          |      |
|----------|---------|----------|-------------------------------------|----------|------|
|          | hay     |          |                                     |          |      |
|          | Alfalfa |          |                                     |          |      |
| Duodenum | hay     | Negative | concentration of lipid              | 3.97E-20 | 417  |
|          | Alfalfa |          |                                     |          |      |
| Duodenum | hay     | Negative | Viral Infection                     | 4.69E-20 | 759  |
|          | Alfalfa |          |                                     |          |      |
| Duodenum | hay     | Negative | cell survival                       | 5.21E-20 | 667  |
|          | Alfalfa |          |                                     |          |      |
| Duodenum | hay     | Negative | transcription of RNA                | 7.33E-20 | 859  |
|          | Alfalfa |          |                                     |          |      |
| Duodenum | hay     | Negative | abnormal morphology of cells        | 9.24E-20 | 612  |
|          | Alfalfa |          |                                     |          |      |
| Duodenum | hay     | Negative | development of body trunk           | 1.53E-19 | 548  |
|          | Alfalfa |          |                                     |          |      |
| Duodenum | hay     | Negative | organization of organelle           | 3.36E-19 | 290  |
|          | Alfalfa |          |                                     |          |      |
| Duodenum | hay     | Negative | cell viability                      | 6.28E-19 | 623  |
|          | Alfalfa |          |                                     |          |      |
| Duodenum | hay     | Negative | cell death of tumor cell lines      | 6.98E-19 | 717  |
|          | Alfalfa |          |                                     |          |      |
| Duodenum | hay     | Negative | digestive system cancer             | 8.66E-19 | 3054 |
|          | Alfalfa |          |                                     |          |      |
| Duodenum | hay     | Negative | vasculogenesis                      | 1.37E-18 | 378  |
|          | Alfalfa |          |                                     |          |      |
| Duodenum | hay     | Negative | digestive organ tumor               | 1.44E-18 | 3079 |
|          | Alfalfa |          |                                     |          |      |
| Duodenum | hay     | Negative | size of body                        | 1.29E-17 | 425  |
|          | Alfalfa |          |                                     |          |      |
| Duodenum | hay     | Negative | growth of organism                  | 1.75E-17 | 418  |
|          | Alfalfa |          |                                     |          |      |
| Duodenum | hay     | Negative | invasion of cells                   | 2.64E-17 | 432  |
|          | Alfalfa |          |                                     |          |      |
| Duodenum | hay     | Negative | transcription of DNA                | 4.20E-17 | 712  |
|          | Alfalfa |          |                                     |          |      |
| Duodenum | hay     | Negative | quantity of blood cells             | 4.84E-17 | 499  |
|          | Alfalfa |          |                                     |          |      |
| Duodenum | hay     | Negative | formation of cellular protrusions   | 5.42E-17 | 445  |
|          | Alfalfa |          |                                     |          |      |
| Duodenum | hay     | Negative | quantity of leukocytes              | 8.29E-17 | 450  |
|          | Alfalfa |          |                                     |          |      |
| Duodenum | hay     | Negative | proliferation of tumor cell lines   | 2.58E-16 | 713  |
|          | Alfalfa |          |                                     |          |      |
| Duodenum | hay     | Negative | morphology of cardiovascular system | 3.02E-16 | 317  |
| Duodenum | Alfalfa | Negative | synthesis of lipid                  | 7.01E-16 | 358  |

|          |         |          |                                              |          |     |
|----------|---------|----------|----------------------------------------------|----------|-----|
|          | hay     |          |                                              |          |     |
|          | Alfalfa |          |                                              |          |     |
| Duodenum | hay     | Negative | morphology of body cavity                    | 8.11E-16 | 564 |
|          | Alfalfa |          |                                              |          |     |
| Duodenum | hay     | Negative | apoptosis of tumor cell lines                | 1.15E-15 | 570 |
|          | Alfalfa |          |                                              |          |     |
| Duodenum | hay     | Negative | abnormal morphology of body cavity           | 2.03E-15 | 540 |
|          | Alfalfa |          |                                              |          |     |
| Duodenum | hay     | Negative | development of cytoplasm                     | 2.97E-15 | 242 |
|          | Alfalfa |          |                                              |          |     |
| Duodenum | hay     | Negative | cell death of connective tissue cells        | 5.27E-15 | 305 |
|          | Alfalfa |          |                                              |          |     |
| Duodenum | hay     | Negative | migration of tumor cell lines                | 1.08E-14 | 350 |
|          | Alfalfa |          |                                              |          |     |
| Duodenum | hay     | Negative | perinatal death                              | 1.14E-14 | 300 |
|          | Alfalfa |          |                                              |          |     |
| Duodenum | hay     | Negative | phosphorylation of protein                   | 2.75E-14 | 361 |
|          | Alfalfa |          |                                              |          |     |
| Duodenum | hay     | Negative | abnormal morphology of thoracic cavity       | 3.05E-14 | 295 |
|          | Alfalfa |          |                                              |          |     |
| Duodenum | hay     | Negative | formation of cytoskeleton                    | 3.79E-14 | 199 |
|          | Alfalfa |          |                                              |          |     |
| Duodenum | hay     | Negative | disorder of basal ganglia                    | 4.08E-14 | 374 |
|          | Alfalfa |          |                                              |          |     |
| Duodenum | hay     | Negative | transactivation                              | 6.49E-14 | 290 |
|          | Alfalfa |          |                                              |          |     |
| Duodenum | hay     | Negative | protein kinase cascade                       | 7.05E-14 | 219 |
|          | Alfalfa |          |                                              |          |     |
| Duodenum | hay     | Negative | dyskinesia                                   | 1.37E-13 | 306 |
|          | Alfalfa |          |                                              |          |     |
| Duodenum | hay     | Negative | Huntington's Disease                         | 1.55E-13 | 287 |
|          | Alfalfa |          |                                              |          |     |
| Duodenum | hay     | Negative | autosomal recessive disease                  | 1.55E-13 | 438 |
|          | Alfalfa |          |                                              |          |     |
| Duodenum | hay     | Negative | fibrogenesis                                 | 1.96E-13 | 213 |
|          | Alfalfa |          |                                              |          |     |
| Duodenum | hay     | Negative | proliferation of connective tissue cells     | 3.12E-13 | 294 |
|          | Alfalfa |          |                                              |          |     |
| Duodenum | hay     | Negative | neurological signs                           | 4.87E-13 | 319 |
|          | Alfalfa |          |                                              |          |     |
| Duodenum | hay     | Negative | abnormal morphology of cardiovascular system | 4.88E-13 | 282 |
|          | Alfalfa |          |                                              |          |     |
| Duodenum | hay     | Negative | growth of embryo                             | 6.73E-13 | 241 |
| Duodenum | Alfalfa | Negative | formation of filaments                       | 7.07E-13 | 205 |



|          |         |          |                                    |          |     |
|----------|---------|----------|------------------------------------|----------|-----|
|          | hay     |          |                                    |          |     |
|          | Alfalfa |          |                                    |          |     |
| Duodenum | hay     | Negative | metabolism of carbohydrate         | 1.31E-12 | 304 |
|          | Alfalfa |          |                                    |          |     |
| Duodenum | hay     | Negative | invasion of tumor cell lines       | 2.90E-12 | 322 |
|          | Alfalfa |          |                                    |          |     |
| Duodenum | hay     | Negative | function of blood cells            | 3.89E-12 | 287 |
|          | Alfalfa |          |                                    |          |     |
| Duodenum | hay     | Negative | ubiquitination                     | 3.93E-12 | 175 |
|          | Alfalfa |          |                                    |          |     |
| Duodenum | hay     | Negative | neuromuscular disease              | 3.96E-12 | 415 |
|          | Alfalfa |          |                                    |          |     |
| Duodenum | hay     | Negative | degeneration of nervous system     | 4.06E-12 | 152 |
|          | Alfalfa |          |                                    |          |     |
| Duodenum | hay     | Negative | function of leukocytes             | 4.17E-12 | 265 |
|          | Alfalfa |          |                                    |          |     |
| Duodenum | hay     | Negative | homing of cells                    | 4.27E-12 | 274 |
|          | Alfalfa |          |                                    |          |     |
| Duodenum | hay     | Negative | morphology of heart                | 4.37E-12 | 206 |
|          | Alfalfa |          |                                    |          |     |
| Duodenum | hay     | Negative | quantity of lymphocytes            | 5.41E-12 | 339 |
|          | Alfalfa |          |                                    |          |     |
| Duodenum | hay     | Negative | ubiquitination of protein          | 6.18E-12 | 172 |
|          | Alfalfa |          |                                    |          |     |
| Duodenum | hay     | Negative | transactivation of RNA             | 6.57E-12 | 267 |
|          | Alfalfa |          |                                    |          |     |
| Duodenum | hay     | Negative | growth of connective tissue        | 7.25E-12 | 311 |
|          | Alfalfa |          |                                    |          |     |
| Duodenum | hay     | Negative | cell viability of tumor cell lines | 7.81E-12 | 369 |
|          | Alfalfa |          |                                    |          |     |
| Duodenum | hay     | Negative | quantity of mononuclear leukocytes | 9.31E-12 | 350 |
|          | Alfalfa |          |                                    |          |     |
| Duodenum | hay     | Negative | Neurodegeneration                  | 9.64E-12 | 161 |
|          | Alfalfa |          |                                    |          |     |
| Duodenum | hay     | Negative | degeneration of cells              | 9.64E-12 | 177 |
|          | Alfalfa |          |                                    |          |     |
| Duodenum | hay     | Negative | quantity of connective tissue      | 1.15E-11 | 292 |
|          | Alfalfa |          |                                    |          |     |
| Duodenum | hay     | Negative | neuronal cell death                | 1.30E-11 | 326 |
|          | Alfalfa |          |                                    |          |     |
| Duodenum | hay     | Negative | behavior                           | 1.30E-11 | 457 |
|          | Alfalfa |          |                                    |          |     |
| Duodenum | hay     | Negative | concentration of fatty acid        | 1.36E-11 | 147 |
| Duodenum | Alfalfa | Negative | homing                             | 1.36E-11 | 279 |

|          |         |          |                                            |          |     |
|----------|---------|----------|--------------------------------------------|----------|-----|
|          | hay     |          |                                            |          |     |
|          | Alfalfa |          |                                            |          |     |
| Duodenum | hay     | Negative | replication of RNA virus                   | 1.43E-11 | 249 |
|          | Alfalfa |          |                                            |          |     |
| Duodenum | hay     | Negative | growth of lesion                           | 2.06E-11 | 375 |
|          | Alfalfa |          |                                            |          |     |
| Duodenum | hay     | Negative | benign neoplasia                           | 2.26E-11 | 429 |
|          | Alfalfa |          |                                            |          |     |
| Duodenum | hay     | Negative | cell cycle progression                     | 2.94E-11 | 479 |
|          | Alfalfa |          |                                            |          |     |
| Duodenum | hay     | Negative | differentiation of connective tissue       | 3.28E-11 | 345 |
|          | Alfalfa |          |                                            |          |     |
| Duodenum | hay     | Negative | growth of tumor                            | 4.05E-11 | 373 |
|          | Alfalfa |          |                                            |          |     |
| Duodenum | hay     | Negative | replication of virus                       | 5.49E-11 | 271 |
|          | Alfalfa |          |                                            |          |     |
| Duodenum | hay     | Negative | quantity of carbohydrate                   | 5.75E-11 | 252 |
|          | Alfalfa |          |                                            |          |     |
| Duodenum | hay     | Negative | chemotaxis of cells                        | 5.85E-11 | 256 |
|          | Alfalfa |          |                                            |          |     |
| Duodenum | hay     | Negative | differentiation of connective tissue cells | 7.16E-11 | 306 |
|          | Alfalfa |          |                                            |          |     |
| Duodenum | hay     | Negative | learning                                   | 8.11E-11 | 207 |
|          | Alfalfa |          |                                            |          |     |
| Duodenum | hay     | Negative | cellular degradation                       | 9.78E-11 | 133 |
|          | Alfalfa |          |                                            |          |     |
| Duodenum | hay     | Negative | activation of DNA endogenous promoter      | 1.07E-10 | 543 |
|          | Alfalfa |          |                                            |          |     |
| Duodenum | hay     | Negative | degeneration of neurons                    | 1.07E-10 | 126 |
|          | Alfalfa |          |                                            |          |     |
| Duodenum | hay     | Negative | Growth Failure                             | 1.07E-10 | 286 |
|          | Alfalfa |          |                                            |          |     |
| Duodenum | hay     | Negative | chemotaxis                                 | 1.57E-10 | 262 |
|          | Alfalfa |          |                                            |          |     |
| Duodenum | hay     | Negative | cognition                                  | 1.68E-10 | 222 |
|          | Alfalfa |          |                                            |          |     |
| Duodenum | hay     | Negative | development of vasculature                 | 1.87E-10 | 206 |
|          | Alfalfa |          |                                            |          |     |
| Duodenum | hay     | Negative | abnormal morphology of head                | 1.95E-10 | 385 |
|          | Alfalfa |          |                                            |          |     |
| Duodenum | hay     | Negative | morphology of head                         | 2.18E-10 | 403 |
|          | Alfalfa |          |                                            |          |     |
| Duodenum | hay     | Negative | abnormal morphology of heart               | 2.30E-10 | 190 |
| Duodenum | Alfalfa | Negative | seizures                                   | 2.36E-10 | 197 |

|          |         |          |                                           |          |      |
|----------|---------|----------|-------------------------------------------|----------|------|
|          | hay     |          |                                           |          |      |
|          | Alfalfa |          |                                           |          |      |
| Duodenum | hay     | Negative | abnormal morphology of abdomen            | 2.44E-10 | 403  |
|          | Alfalfa |          |                                           |          |      |
| Duodenum | hay     | Negative | accumulation of lipid                     | 2.47E-10 | 152  |
|          | Alfalfa |          |                                           |          |      |
| Duodenum | hay     | Negative | breast or colorectal cancer               | 2.54E-10 | 2031 |
|          | Alfalfa |          |                                           |          |      |
| Duodenum | hay     | Negative | necrosis of epithelial tissue             | 2.60E-10 | 280  |
|          | Alfalfa |          |                                           |          |      |
| Duodenum | hay     | Negative | seizure disorder                          | 2.75E-10 | 228  |
|          | Alfalfa |          |                                           |          |      |
| Duodenum | hay     | Negative | proliferation of fibroblasts              | 2.98E-10 | 176  |
|          | Alfalfa |          |                                           |          |      |
| Duodenum | hay     | Negative | uptake of monosaccharide                  | 3.94E-10 | 138  |
|          | Alfalfa |          |                                           |          |      |
| Duodenum | hay     | Negative | proliferation of blood cells              | 4.88E-10 | 387  |
|          | Alfalfa |          |                                           |          |      |
| Duodenum | hay     | Negative | quantity of T lymphocytes                 | 6.73E-10 | 255  |
|          | Alfalfa |          |                                           |          |      |
| Duodenum | hay     | Negative | uptake of carbohydrate                    | 6.77E-10 | 147  |
|          | Alfalfa |          |                                           |          |      |
| Duodenum | hay     | Negative | secretion of molecule                     | 6.84E-10 | 262  |
|          | Alfalfa |          |                                           |          |      |
| Duodenum | hay     | Negative | migration of blood cells                  | 7.22E-10 | 399  |
|          | Alfalfa |          |                                           |          |      |
| Duodenum | hay     | Negative | morphology of respiratory system          | 8.00E-10 | 156  |
|          | Alfalfa |          |                                           |          |      |
| Duodenum | hay     | Negative | abnormal morphology of respiratory system | 8.11E-10 | 154  |
|          | Alfalfa |          |                                           |          |      |
| Duodenum | hay     | Negative | leukocyte migration                       | 8.53E-10 | 398  |
|          | Alfalfa |          |                                           |          |      |
| Duodenum | hay     | Negative | neuritogenesis                            | 9.94E-10 | 275  |
|          | Alfalfa |          |                                           |          |      |
| Duodenum | hay     | Negative | fatty acid metabolism                     | 1.36E-09 | 282  |
|          | Alfalfa |          |                                           |          |      |
| Duodenum | hay     | Negative | activation of cells                       | 1.44E-09 | 441  |
|          | Alfalfa |          |                                           |          |      |
| Duodenum | hay     | Negative | formation of plasma membrane projections  | 1.48E-09 | 280  |
|          | Alfalfa |          |                                           |          |      |
| Duodenum | hay     | Negative | endocytosis                               | 1.56E-09 | 170  |
|          | Alfalfa |          |                                           |          |      |
| Duodenum | hay     | Negative | proliferation of neuronal cells           | 1.63E-09 | 271  |
| Duodenum | Alfalfa | Negative | Organ Degeneration                        | 1.78E-09 | 235  |

|          |         |          |                                         |          |     |
|----------|---------|----------|-----------------------------------------|----------|-----|
|          | hay     |          |                                         |          |     |
|          | Alfalfa |          |                                         |          |     |
| Duodenum | hay     | Negative | differentiation of leukocytes           | 1.86E-09 | 312 |
|          | Alfalfa |          |                                         |          |     |
| Duodenum | hay     | Negative | abnormal morphology of digestive system | 1.88E-09 | 257 |
|          | Alfalfa |          |                                         |          |     |
| Duodenum | hay     | Negative | morphology of nervous system            | 2.01E-09 | 359 |
|          | Alfalfa |          |                                         |          |     |
| Duodenum | hay     | Negative | development of leukocytes               | 2.02E-09 | 276 |
|          | Alfalfa |          |                                         |          |     |
| Duodenum | hay     | Negative | concentration of phospholipid           | 2.15E-09 | 97  |
|          | Alfalfa |          |                                         |          |     |
| Duodenum | hay     | Negative | proliferation of fibroblast cell lines  | 2.32E-09 | 204 |
|          | Alfalfa |          |                                         |          |     |
| Duodenum | hay     | Negative | development of neurons                  | 2.37E-09 | 358 |
|          | Alfalfa |          |                                         |          |     |
| Duodenum | hay     | Negative | development of blood cells              | 2.44E-09 | 303 |
|          | Alfalfa |          |                                         |          |     |
| Duodenum | hay     | Negative | synthesis of DNA                        | 2.54E-09 | 201 |
|          | Alfalfa |          |                                         |          |     |
| Duodenum | hay     | Negative | cell movement of leukocytes             | 2.95E-09 | 351 |
|          | Alfalfa |          |                                         |          |     |
| Duodenum | hay     | Negative | binding of DNA                          | 2.95E-09 | 246 |
|          | Alfalfa |          |                                         |          |     |
| Duodenum | hay     | Negative | differentiation of blood cells          | 3.34E-09 | 383 |
|          | Alfalfa |          |                                         |          |     |
| Duodenum | hay     | Negative | engulfment of cells                     | 3.63E-09 | 196 |
|          | Alfalfa |          |                                         |          |     |
| Duodenum | hay     | Negative | neonatal death                          | 3.83E-09 | 210 |
|          | Alfalfa |          |                                         |          |     |
| Duodenum | hay     | Negative | phosphorylation of L-amino acid         | 3.93E-09 | 113 |
|          | Alfalfa |          |                                         |          |     |
| Duodenum | hay     | Negative | morphology of digestive system          | 4.05E-09 | 267 |
|          | Alfalfa |          |                                         |          |     |
| Duodenum | hay     | Negative | infection by Retroviridae               | 4.37E-09 | 330 |
|          | Alfalfa |          |                                         |          |     |
| Duodenum | hay     | Negative | survival of organism                    | 4.75E-09 | 323 |
|          | Alfalfa |          |                                         |          |     |
| Duodenum | hay     | Negative | female genital tract serous cancer      | 4.94E-09 | 186 |
|          | Alfalfa |          |                                         |          |     |
| Duodenum | hay     | Negative | development of lymphocytes              | 4.95E-09 | 259 |
|          | Alfalfa |          |                                         |          |     |
| Duodenum | hay     | Negative | growth of epithelial tissue             | 5.13E-09 | 313 |
| Duodenum | Alfalfa | Negative | development of epithelial tissue        | 5.33E-09 | 243 |

|          |         |          |                                           |          |      |
|----------|---------|----------|-------------------------------------------|----------|------|
|          | hay     |          |                                           |          |      |
|          | Alfalfa |          |                                           |          |      |
| Duodenum | hay     | Negative | cell death of fibroblast cell lines       | 5.57E-09 | 204  |
|          | Alfalfa |          |                                           |          |      |
| Duodenum | hay     | Negative | activation of enzyme                      | 5.69E-09 | 187  |
|          | Alfalfa |          |                                           |          |      |
| Duodenum | hay     | Negative | development of lymphatic system           | 5.79E-09 | 173  |
|          | Alfalfa |          |                                           |          |      |
| Duodenum | hay     | Negative | sprouting                                 | 5.82E-09 | 186  |
|          | Alfalfa |          |                                           |          |      |
| Duodenum | hay     | Negative | metabolism of protein                     | 6.28E-09 | 435  |
|          | Alfalfa |          |                                           |          |      |
| Duodenum | hay     | Negative | quantity of lymphatic system component    | 6.58E-09 | 182  |
|          | Alfalfa |          |                                           |          |      |
| Duodenum | hay     | Negative | breast or ovarian cancer                  | 6.99E-09 | 815  |
|          | Alfalfa |          |                                           |          |      |
| Duodenum | hay     | Negative | development of mononuclear leukocytes     | 7.28E-09 | 260  |
|          | Alfalfa |          |                                           |          |      |
| Duodenum | hay     | Negative | cell transformation                       | 7.65E-09 | 218  |
|          | Alfalfa |          |                                           |          |      |
| Duodenum | hay     | Negative | serous neoplasm                           | 8.47E-09 | 282  |
|          | Alfalfa |          |                                           |          |      |
| Duodenum | hay     | Negative | proliferation of immune cells             | 8.50E-09 | 359  |
|          | Alfalfa |          |                                           |          |      |
| Duodenum | hay     | Negative | cell movement of myeloid cells            | 8.93E-09 | 252  |
|          | Alfalfa |          |                                           |          |      |
| Duodenum | hay     | Negative | HIV infection                             | 1.04E-08 | 325  |
|          | Alfalfa |          |                                           |          |      |
| Duodenum | hay     | Negative | gastrointestinal tract cancer             | 1.06E-08 | 2048 |
|          | Alfalfa |          |                                           |          |      |
| Duodenum | hay     | Negative | cell death of epithelial cells            | 1.10E-08 | 233  |
|          | Alfalfa |          |                                           |          |      |
| Duodenum | hay     | Negative | interphase                                | 1.18E-08 | 301  |
|          | Alfalfa |          |                                           |          |      |
| Duodenum | hay     | Negative | abnormal morphology of nervous system     | 1.18E-08 | 330  |
|          | Alfalfa |          |                                           |          |      |
| Duodenum | hay     | Negative | infection by RNA virus                    | 1.38E-08 | 389  |
|          | Alfalfa |          |                                           |          |      |
| Duodenum | hay     | Negative | peripheral vascular disease               | 1.39E-08 | 182  |
|          | Alfalfa |          |                                           |          |      |
| Duodenum | hay     | Negative | branching of cells                        | 1.64E-08 | 177  |
|          | Alfalfa |          |                                           |          |      |
| Duodenum | hay     | Negative | small GTPase mediated signal transduction | 1.64E-08 | 95   |
| Duodenum | Alfalfa | Negative | formation of lymphatic system component   | 1.67E-08 | 143  |

|          |         |          |                                          |          |      |
|----------|---------|----------|------------------------------------------|----------|------|
|          | hay     |          |                                          |          |      |
|          | Alfalfa |          |                                          |          |      |
| Duodenum | hay     | Negative | morphology of muscle                     | 1.69E-08 | 162  |
|          | Alfalfa |          |                                          |          |      |
| Duodenum | hay     | Negative | colony formation of cells                | 1.70E-08 | 230  |
|          | Alfalfa |          |                                          |          |      |
| Duodenum | hay     | Negative | homeostasis of leukocytes                | 1.73E-08 | 257  |
|          | Alfalfa |          |                                          |          |      |
| Duodenum | hay     | Negative | Gastrointestinal Tract Cancer and Tumors | 1.82E-08 | 2077 |
|          | Alfalfa |          |                                          |          |      |
| Duodenum | hay     | Negative | formation of cells                       | 1.91E-08 | 436  |
|          | Alfalfa |          |                                          |          |      |
| Duodenum | hay     | Negative | morphology of pulmonary alveolus         | 2.27E-08 | 65   |
|          | Alfalfa |          |                                          |          |      |
| Duodenum | hay     | Negative | advanced malignant tumor                 | 2.27E-08 | 379  |
|          | Alfalfa |          |                                          |          |      |
| Duodenum | hay     | Negative | cell movement of phagocytes              | 2.30E-08 | 254  |
|          | Alfalfa |          |                                          |          |      |
| Duodenum | hay     | Negative | formation of actin filaments             | 2.31E-08 | 148  |
|          | Alfalfa |          |                                          |          |      |
| Duodenum | hay     | Negative | apoptosis of connective tissue cells     | 2.50E-08 | 144  |
|          | Alfalfa |          |                                          |          |      |
| Duodenum | hay     | Negative | Lymphocyte homeostasis                   | 2.50E-08 | 252  |
|          | Alfalfa |          |                                          |          |      |
| Duodenum | hay     | Negative | epileptic seizure                        | 2.78E-08 | 87   |
|          | Alfalfa |          |                                          |          |      |
| Duodenum | hay     | Negative | quantity of lymphoid organ               | 2.78E-08 | 149  |
|          | Alfalfa |          |                                          |          |      |
| Duodenum | hay     | Negative | autosomal dominant disease               | 2.79E-08 | 291  |
|          | Alfalfa |          |                                          |          |      |
| Duodenum | hay     | Negative | development of cardiovascular tissue     | 2.89E-08 | 176  |
|          | Alfalfa |          |                                          |          |      |
| Duodenum | hay     | Negative | synthesis of carbohydrate                | 2.96E-08 | 200  |
|          | Alfalfa |          |                                          |          |      |
| Duodenum | hay     | Negative | colony formation                         | 2.96E-08 | 248  |
|          | Alfalfa |          |                                          |          |      |
| Duodenum | hay     | Negative | proliferation of embryonic cells         | 3.13E-08 | 123  |
|          | Alfalfa |          |                                          |          |      |
| Duodenum | hay     | Negative | quantity of reactive oxygen species      | 3.31E-08 | 91   |
|          | Alfalfa |          |                                          |          |      |
| Duodenum | hay     | Negative | adenocarcinoma                           | 3.42E-08 | 2598 |
|          | Alfalfa |          |                                          |          |      |
| Duodenum | hay     | Negative | proliferation of mononuclear leukocytes  | 3.42E-08 | 333  |
| Duodenum | Alfalfa | Negative | metabolism of nucleic acid component or  | 3.65E-08 | 240  |

|          |         |          |                                            |          |      |
|----------|---------|----------|--------------------------------------------|----------|------|
|          | hay     |          | derivative                                 |          |      |
|          | Alfalfa |          |                                            |          |      |
| Duodenum | hay     | Negative | T cell development                         | 3.67E-08 | 233  |
|          | Alfalfa |          |                                            |          |      |
| Duodenum | hay     | Negative | proliferation of lymphocytes               | 3.87E-08 | 328  |
|          | Alfalfa |          |                                            |          |      |
| Duodenum | hay     | Negative | development of lymphatic system component  | 4.12E-08 | 149  |
|          | Alfalfa |          |                                            |          |      |
| Duodenum | hay     | Negative | gastrointestinal carcinoma                 | 4.40E-08 | 1836 |
|          | Alfalfa |          |                                            |          |      |
| Duodenum | hay     | Negative | metabolism of membrane lipid derivative    | 4.62E-08 | 183  |
|          | Alfalfa |          |                                            |          |      |
| Duodenum | hay     | Negative | concentration of acylglycerol              | 4.62E-08 | 160  |
|          | Alfalfa |          |                                            |          |      |
| Duodenum | hay     | Negative | arthropathy                                | 4.93E-08 | 421  |
|          | Alfalfa |          |                                            |          |      |
| Duodenum | hay     | Negative | replication of Influenza virus             | 4.95E-08 | 140  |
|          | Alfalfa |          |                                            |          |      |
| Duodenum | hay     | Negative | apoptosis of fibroblast cell lines         | 4.99E-08 | 157  |
|          | Alfalfa |          |                                            |          |      |
| Duodenum | hay     | Negative | development of abdomen                     | 5.52E-08 | 265  |
|          | Alfalfa |          |                                            |          |      |
| Duodenum | hay     | Negative | development of head                        | 6.48E-08 | 432  |
|          | Alfalfa |          |                                            |          |      |
| Duodenum | hay     | Negative | formation of actin stress fibers           | 6.49E-08 | 118  |
|          | Alfalfa |          |                                            |          |      |
| Duodenum | hay     | Negative | mass of organism                           | 7.05E-08 | 159  |
|          | Alfalfa |          |                                            |          |      |
| Duodenum | hay     | Negative | infection of cells                         | 7.06E-08 | 356  |
|          | Alfalfa |          |                                            |          |      |
| Duodenum | hay     | Negative | arthritis                                  | 8.31E-08 | 413  |
|          | Alfalfa |          |                                            |          |      |
| Duodenum | hay     | Negative | uterine serous papillary cancer            | 8.38E-08 | 114  |
|          | Alfalfa |          |                                            |          |      |
| Duodenum | hay     | Negative | abnormal morphology of reproductive system | 8.67E-08 | 234  |
|          | Alfalfa |          |                                            |          |      |
| Duodenum | hay     | Negative | T cell homeostasis                         | 8.73E-08 | 237  |
|          | Alfalfa |          |                                            |          |      |
| Duodenum | hay     | Negative | dyspnea                                    | 9.25E-08 | 71   |
|          | Alfalfa |          |                                            |          |      |
| Duodenum | hay     | Negative | synthesis of fatty acid                    | 9.25E-08 | 149  |
|          | Alfalfa |          |                                            |          |      |
| Duodenum | hay     | Negative | abnormal morphology of epithelial tissue   | 9.70E-08 | 195  |
| Duodenum | Alfalfa | Negative | replication of Influenza A virus           | 9.73E-08 | 138  |

|          |         |          |                                              |          |     |
|----------|---------|----------|----------------------------------------------|----------|-----|
|          | hay     |          |                                              |          |     |
|          | Alfalfa |          |                                              |          |     |
| Duodenum | hay     | Negative | long-term potentiation                       | 1.03E-07 | 119 |
|          | Alfalfa |          |                                              |          |     |
| Duodenum | hay     | Negative | inflammatory response                        | 1.11E-07 | 347 |
|          | Alfalfa |          |                                              |          |     |
| Duodenum | hay     | Negative | abnormal morphology of embryonic tissue      | 1.12E-07 | 250 |
|          | Alfalfa |          |                                              |          |     |
| Duodenum | hay     | Negative | dephosphorylation of protein                 | 1.14E-07 | 94  |
|          | Alfalfa |          |                                              |          |     |
| Duodenum | hay     | Negative | development of endothelial tissue            | 1.15E-07 | 172 |
|          | Alfalfa |          |                                              |          |     |
| Duodenum | hay     | Negative | formation of lymphoid organ                  | 1.15E-07 | 128 |
|          | Alfalfa |          |                                              |          |     |
| Duodenum | hay     | Negative | development of body axis                     | 1.17E-07 | 459 |
|          | Alfalfa |          |                                              |          |     |
| Duodenum | hay     | Negative | accumulation of cells                        | 1.17E-07 | 166 |
|          | Alfalfa |          |                                              |          |     |
| Duodenum | hay     | Negative | infection by HIV-1                           | 1.23E-07 | 276 |
|          | Alfalfa |          |                                              |          |     |
| Duodenum | hay     | Negative | growth of plasma membrane projections        | 1.25E-07 | 215 |
|          | Alfalfa |          |                                              |          |     |
| Duodenum | hay     | Negative | size of animal                               | 1.35E-07 | 90  |
|          | Alfalfa |          |                                              |          |     |
| Duodenum | hay     | Negative | export of molecule                           | 1.35E-07 | 141 |
|          | Alfalfa |          |                                              |          |     |
| Duodenum | hay     | Negative | morphology of reproductive system            | 1.46E-07 | 244 |
|          | Alfalfa |          |                                              |          |     |
| Duodenum | hay     | Negative | S phase                                      | 1.47E-07 | 126 |
|          | Alfalfa |          |                                              |          |     |
| Duodenum | hay     | Negative | function of cardiovascular system            | 1.57E-07 | 173 |
|          | Alfalfa |          |                                              |          |     |
| Duodenum | hay     | Negative | growth of embryonic tissue                   | 1.65E-07 | 132 |
|          | Alfalfa |          |                                              |          |     |
| Duodenum | hay     | Negative | endothelial cell development                 | 1.67E-07 | 166 |
|          | Alfalfa |          |                                              |          |     |
| Duodenum | hay     | Negative | formation of leukocytes                      | 1.73E-07 | 81  |
|          | Alfalfa |          |                                              |          |     |
| Duodenum | hay     | Negative | cell movement of breast cancer cell lines    | 1.77E-07 | 138 |
|          | Alfalfa |          |                                              |          |     |
| Duodenum | hay     | Negative | congenital anomaly of musculoskeletal system | 1.77E-07 | 328 |
|          | Alfalfa |          |                                              |          |     |
| Duodenum | hay     | Negative | formation of lung                            | 1.91E-07 | 143 |
| Duodenum | Alfalfa | Negative | organization of actin cytoskeleton           | 1.91E-07 | 143 |



|          |         |          |                                              |          |      |
|----------|---------|----------|----------------------------------------------|----------|------|
|          | hay     |          |                                              |          |      |
|          | Alfalfa |          |                                              |          |      |
| Duodenum | hay     | Negative | abnormal morphology of pulmonary alveolus    | 2.02E-07 | 61   |
|          | Alfalfa |          |                                              |          |      |
| Duodenum | hay     | Negative | uptake of D-hexose                           | 2.15E-07 | 109  |
|          | Alfalfa |          |                                              |          |      |
| Duodenum | hay     | Negative | cell viability of cervical cancer cell lines | 2.15E-07 | 108  |
|          | Alfalfa |          |                                              |          |      |
| Duodenum | hay     | Negative | metabolism of nucleotide                     | 2.16E-07 | 202  |
|          | Alfalfa |          |                                              |          |      |
| Duodenum | hay     | Negative | development of connective tissue             | 2.19E-07 | 173  |
|          | Alfalfa |          |                                              |          |      |
| Duodenum | hay     | Negative | function of muscle                           | 2.19E-07 | 163  |
|          | Alfalfa |          |                                              |          |      |
| Duodenum | hay     | Negative | metabolism of reactive oxygen species        | 2.24E-07 | 228  |
|          | Alfalfa |          |                                              |          |      |
| Duodenum | hay     | Negative | abdominal adenocarcinoma                     | 2.24E-07 | 2359 |
|          | Alfalfa |          |                                              |          |      |
| Duodenum | hay     | Negative | dysmyelination                               | 2.30E-07 | 70   |
|          | Alfalfa |          |                                              |          |      |
| Duodenum | hay     | Negative | morphogenesis of neurons                     | 2.35E-07 | 196  |
|          | Alfalfa |          |                                              |          |      |
| Duodenum | hay     | Negative | morphology of vessel                         | 2.65E-07 | 145  |
|          | Alfalfa |          |                                              |          |      |
| Duodenum | hay     | Negative | morphology of connective tissue              | 2.68E-07 | 211  |
|          | Alfalfa |          |                                              |          |      |
| Duodenum | hay     | Negative | synthesis of reactive oxygen species         | 2.93E-07 | 219  |
|          | Alfalfa |          |                                              |          |      |
| Duodenum | hay     | Negative | cytopenia                                    | 2.95E-07 | 141  |
|          | Alfalfa |          |                                              |          |      |
| Duodenum | hay     | Negative | vascularization                              | 3.30E-07 | 114  |
|          | Alfalfa |          |                                              |          |      |
| Duodenum | hay     | Negative | morphology of bone                           | 3.35E-07 | 206  |
|          | Alfalfa |          |                                              |          |      |
| Duodenum | hay     | Negative | quantity of phagocytes                       | 3.38E-07 | 195  |
|          | Alfalfa |          |                                              |          |      |
| Duodenum | hay     | Negative | ion homeostasis of cells                     | 3.51E-07 | 251  |
|          | Alfalfa |          |                                              |          |      |
| Duodenum | hay     | Negative | growth of neurites                           | 3.61E-07 | 211  |
|          | Alfalfa |          |                                              |          |      |
| Duodenum | hay     | Negative | growth of muscle tissue                      | 3.61E-07 | 173  |
|          | Alfalfa |          |                                              |          |      |
| Duodenum | hay     | Negative | metastasis                                   | 3.61E-07 | 336  |
| Duodenum | Alfalfa | Negative | abnormal morphology of bone                  | 3.69E-07 | 200  |

|          |         |          |                                            |          |      |
|----------|---------|----------|--------------------------------------------|----------|------|
|          | hay     |          |                                            |          |      |
|          | Alfalfa |          |                                            |          |      |
| Duodenum | hay     | Negative | proliferation of muscle cells              | 3.74E-07 | 172  |
|          | Alfalfa |          |                                            |          |      |
| Duodenum | hay     | Negative | function of phagocytes                     | 3.97E-07 | 144  |
|          | Alfalfa |          |                                            |          |      |
| Duodenum | hay     | Negative | cardiogenesis                              | 4.01E-07 | 215  |
|          | Alfalfa |          |                                            |          |      |
| Duodenum | hay     | Negative | mammary tumor                              | 4.18E-07 | 691  |
|          | Alfalfa |          |                                            |          |      |
| Duodenum | hay     | Negative | uptake of D-glucose                        | 4.32E-07 | 107  |
|          | Alfalfa |          |                                            |          |      |
| Duodenum | hay     | Negative | invasion of prostate cancer cell lines     | 4.38E-07 | 55   |
|          | Alfalfa |          |                                            |          |      |
| Duodenum | hay     | Negative | morphogenesis of neurites                  | 4.42E-07 | 192  |
|          | Alfalfa |          |                                            |          |      |
| Duodenum | hay     | Negative | quantity of adipose tissue                 | 4.46E-07 | 132  |
|          | Alfalfa |          |                                            |          |      |
| Duodenum | hay     | Negative | synthesis of nitric oxide                  | 4.56E-07 | 131  |
|          | Alfalfa |          |                                            |          |      |
| Duodenum | hay     | Negative | morphology of lymphatic system component   | 4.57E-07 | 191  |
|          | Alfalfa |          |                                            |          |      |
| Duodenum | hay     | Negative | dysgenesis                                 | 5.05E-07 | 243  |
|          | Alfalfa |          |                                            |          |      |
| Duodenum | hay     | Negative | quantity of steroid                        | 5.28E-07 | 212  |
|          | Alfalfa |          |                                            |          |      |
| Duodenum | hay     | Negative | quantity of hematopoietic cells            | 5.28E-07 | 202  |
|          | Alfalfa |          |                                            |          |      |
| Duodenum | hay     | Negative | organization of filaments                  | 5.55E-07 | 100  |
|          | Alfalfa |          |                                            |          |      |
| Duodenum | hay     | Negative | cell death of muscle cells                 | 5.57E-07 | 156  |
|          | Alfalfa |          |                                            |          |      |
| Duodenum | hay     | Negative | activation of Protein kinase               | 5.73E-07 | 120  |
|          | Alfalfa |          |                                            |          |      |
| Duodenum | hay     | Negative | hypersensitive reaction                    | 5.88E-07 | 196  |
|          | Alfalfa |          |                                            |          |      |
| Duodenum | hay     | Negative | cell death of blood cells                  | 6.14E-07 | 307  |
|          | Alfalfa |          |                                            |          |      |
| Duodenum | hay     | Negative | Dermatitis                                 | 6.27E-07 | 198  |
|          | Alfalfa |          |                                            |          |      |
| Duodenum | hay     | Negative | quantity of hematopoietic progenitor cells | 6.38E-07 | 201  |
|          | Alfalfa |          |                                            |          |      |
| Duodenum | hay     | Negative | cell death of epithelial cell lines        | 6.43E-07 | 133  |
| Duodenum | Alfalfa | Negative | colorectal neoplasia                       | 6.45E-07 | 1750 |

|          |         |          |                                             |          |      |
|----------|---------|----------|---------------------------------------------|----------|------|
|          | hay     |          |                                             |          |      |
|          | Alfalfa |          |                                             |          |      |
| Duodenum | hay     | Negative | differentiation of epithelial tissue        | 6.45E-07 | 166  |
|          | Alfalfa |          |                                             |          |      |
| Duodenum | hay     | Negative | apoptosis of muscle                         | 6.45E-07 | 124  |
|          | Alfalfa |          |                                             |          |      |
| Duodenum | hay     | Negative | quantity of metal                           | 6.70E-07 | 225  |
|          | Alfalfa |          |                                             |          |      |
| Duodenum | hay     | Negative | formation of skin                           | 6.77E-07 | 169  |
|          | Alfalfa |          |                                             |          |      |
| Duodenum | hay     | Negative | secretory pathway                           | 6.90E-07 | 96   |
|          | Alfalfa |          |                                             |          |      |
| Duodenum | hay     | Negative | mitosis                                     | 6.98E-07 | 224  |
|          | Alfalfa |          |                                             |          |      |
| Duodenum | hay     | Negative | morphology of muscle cells                  | 7.37E-07 | 82   |
|          | Alfalfa |          |                                             |          |      |
| Duodenum | hay     | Negative | cell death of cervical cancer cell lines    | 7.43E-07 | 162  |
|          | Alfalfa |          |                                             |          |      |
| Duodenum | hay     | Negative | proliferation of smooth muscle cells        | 7.49E-07 | 134  |
|          | Alfalfa |          |                                             |          |      |
| Duodenum | hay     | Negative | concentration of phosphatidic acid          | 7.79E-07 | 69   |
|          | Alfalfa |          |                                             |          |      |
| Duodenum | hay     | Negative | intestinal tumor                            | 7.92E-07 | 1754 |
|          | Alfalfa |          |                                             |          |      |
| Duodenum | hay     | Negative | apoptosis of muscle cells                   | 8.01E-07 | 123  |
|          | Alfalfa |          |                                             |          |      |
| Duodenum | hay     | Negative | congenital anomaly of cardiovascular system | 8.18E-07 | 109  |
|          | Alfalfa |          |                                             |          |      |
| Duodenum | hay     | Negative | cell death of muscle                        | 8.23E-07 | 159  |
|          | Alfalfa |          |                                             |          |      |
| Duodenum | hay     | Negative | Hypertrophy                                 | 8.27E-07 | 214  |
|          | Alfalfa |          |                                             |          |      |
| Duodenum | hay     | Negative | peripheral arterial disease                 | 8.64E-07 | 102  |
|          | Alfalfa |          |                                             |          |      |
| Duodenum | hay     | Negative | morphology of skin                          | 8.66E-07 | 128  |
|          | Alfalfa |          |                                             |          |      |
| Duodenum | hay     | Negative | invasion of carcinoma cell lines            | 8.66E-07 | 96   |
|          | Alfalfa |          |                                             |          |      |
| Duodenum | hay     | Negative | MAPKKK cascade                              | 8.66E-07 | 99   |
|          | Alfalfa |          |                                             |          |      |
| Duodenum | hay     | Negative | neurodegeneration of neurites               | 8.79E-07 | 49   |
|          | Alfalfa |          |                                             |          |      |
| Duodenum | hay     | Negative | Hypoplasia                                  | 8.97E-07 | 227  |
| Duodenum | Alfalfa | Negative | plasticity of synapse                       | 9.01E-07 | 62   |

|          |         |          |                                           |          |      |
|----------|---------|----------|-------------------------------------------|----------|------|
|          | hay     |          |                                           |          |      |
|          | Alfalfa |          |                                           |          |      |
| Duodenum | hay     | Negative | differentiation of mononuclear leukocytes | 9.80E-07 | 242  |
|          | Alfalfa |          |                                           |          |      |
| Duodenum | hay     | Negative | quantity of thymus gland                  | 9.81E-07 | 111  |
|          | Alfalfa |          |                                           |          |      |
| Duodenum | hay     | Negative | quantity of thymocytes                    | 9.93E-07 | 110  |
|          | Alfalfa |          |                                           |          |      |
| Duodenum | hay     | Negative | necrosis of muscle                        | 9.96E-07 | 158  |
|          | Alfalfa |          |                                           |          |      |
| Duodenum | hay     | Negative | concentration of Ca <sup>2+</sup>         | 1.14E-06 | 65   |
|          | Alfalfa |          |                                           |          |      |
| Duodenum | hay     | Negative | chemotaxis of myeloid cells               | 1.24E-06 | 136  |
|          | Alfalfa |          |                                           |          |      |
| Duodenum | hay     | Negative | morphology of cardiac muscle              | 1.26E-06 | 82   |
|          | Alfalfa |          |                                           |          |      |
| Duodenum | hay     | Negative | allergy                                   | 1.29E-06 | 184  |
|          | Alfalfa |          |                                           |          |      |
| Duodenum | hay     | Negative | intestinal cancer                         | 1.29E-06 | 1726 |
|          | Alfalfa |          |                                           |          |      |
| Duodenum | hay     | Negative | cell movement of connective tissue cells  | 1.31E-06 | 106  |
|          | Alfalfa |          |                                           |          |      |
| Duodenum | hay     | Negative | colorectal cancer                         | 1.32E-06 | 1723 |
|          | Alfalfa |          |                                           |          |      |
| Duodenum | hay     | Negative | apoptosis of neurons                      | 1.32E-06 | 197  |
|          | Alfalfa |          |                                           |          |      |
| Duodenum | hay     | Negative | gonadal tumor                             | 1.37E-06 | 357  |
|          | Alfalfa |          |                                           |          |      |
| Duodenum | hay     | Negative | quantity of glycosphingolipid             | 1.37E-06 | 52   |
|          | Alfalfa |          |                                           |          |      |
| Duodenum | hay     | Negative | cell movement of fibroblasts              | 1.37E-06 | 89   |
|          | Alfalfa |          |                                           |          |      |
| Duodenum | hay     | Negative | migration of breast cancer cell lines     | 1.37E-06 | 116  |
|          | Alfalfa |          |                                           |          |      |
| Duodenum | hay     | Negative | colon cancer                              | 1.37E-06 | 1495 |
|          | Alfalfa |          |                                           |          |      |
| Duodenum | hay     | Negative | morphology of lung                        | 1.38E-06 | 91   |
|          | Alfalfa |          |                                           |          |      |
| Duodenum | hay     | Negative | synthesis of nucleotide                   | 1.42E-06 | 166  |
|          | Alfalfa |          |                                           |          |      |
| Duodenum | hay     | Negative | activation of leukocytes                  | 1.43E-06 | 307  |
|          | Alfalfa |          |                                           |          |      |
| Duodenum | hay     | Negative | cell spreading                            | 1.48E-06 | 129  |
| Duodenum | Alfalfa | Negative | quantity of antigen presenting cells      | 1.48E-06 | 129  |

|          |         |          |                                         |          |      |
|----------|---------|----------|-----------------------------------------|----------|------|
|          | hay     |          |                                         |          |      |
|          | Alfalfa |          |                                         |          |      |
| Duodenum | hay     | Negative | quantity of protein in blood            | 1.50E-06 | 227  |
|          | Alfalfa |          |                                         |          |      |
| Duodenum | hay     | Negative | colon tumor                             | 1.53E-06 | 1503 |
|          | Alfalfa |          |                                         |          |      |
| Duodenum | hay     | Negative | Ovarian Cancer and Tumors               | 1.57E-06 | 331  |
|          | Alfalfa |          |                                         |          |      |
| Duodenum | hay     | Negative | epilepsy                                | 1.74E-06 | 142  |
|          | Alfalfa |          |                                         |          |      |
| Duodenum | hay     | Negative | formation of muscle                     | 1.74E-06 | 180  |
|          | Alfalfa |          |                                         |          |      |
| Duodenum | hay     | Negative | accumulation of blood cells             | 1.74E-06 | 130  |
|          | Alfalfa |          |                                         |          |      |
| Duodenum | hay     | Negative | hepatocellular carcinoma                | 1.84E-06 | 1682 |
|          | Alfalfa |          |                                         |          |      |
| Duodenum | hay     | Negative | quantity of B lymphocytes               | 1.94E-06 | 158  |
|          | Alfalfa |          |                                         |          |      |
| Duodenum | hay     | Negative | apoptosis of epithelial cell lines      | 2.01E-06 | 106  |
|          | Alfalfa |          |                                         |          |      |
| Duodenum | hay     | Negative | neoplasia of colon                      | 2.05E-06 | 1497 |
|          | Alfalfa |          |                                         |          |      |
| Duodenum | hay     | Negative | morphology of blood vessel              | 2.05E-06 | 131  |
|          | Alfalfa |          |                                         |          |      |
| Duodenum | hay     | Negative | colorectal carcinoma                    | 2.09E-06 | 1494 |
|          | Alfalfa |          |                                         |          |      |
| Duodenum | hay     | Negative | transmembrane potential of mitochondria | 2.10E-06 | 102  |
|          | Alfalfa |          |                                         |          |      |
| Duodenum | hay     | Negative | ruffling                                | 2.12E-06 | 56   |
|          | Alfalfa |          |                                         |          |      |
| Duodenum | hay     | Negative | mass of connective tissue               | 2.21E-06 | 96   |
|          | Alfalfa |          |                                         |          |      |
| Duodenum | hay     | Negative | function of myeloid cells               | 2.23E-06 | 112  |
|          | Alfalfa |          |                                         |          |      |
| Duodenum | hay     | Negative | demyelination                           | 2.27E-06 | 61   |
|          | Alfalfa |          |                                         |          |      |
| Duodenum | hay     | Negative | transport of protein                    | 2.28E-06 | 139  |
|          | Alfalfa |          |                                         |          |      |
| Duodenum | hay     | Negative | proliferation of hematopoietic cells    | 2.33E-06 | 119  |
|          | Alfalfa |          |                                         |          |      |
| Duodenum | hay     | Negative | Rheumatic Disease                       | 2.39E-06 | 460  |
|          | Alfalfa |          |                                         |          |      |
| Duodenum | hay     | Negative | hepatobiliary system cancer             | 2.42E-06 | 1741 |
| Duodenum | Alfalfa | Negative | metabolism of monosaccharide            | 2.42E-06 | 62   |

|          |         |          |                                          |          |      |
|----------|---------|----------|------------------------------------------|----------|------|
|          | hay     |          |                                          |          |      |
|          | Alfalfa |          |                                          |          |      |
| Duodenum | hay     | Negative | inflammation of organ                    | 2.48E-06 | 499  |
|          | Alfalfa |          |                                          |          |      |
| Duodenum | hay     | Negative | tumorigenesis of intestine               | 2.62E-06 | 1499 |
|          | Alfalfa |          |                                          |          |      |
| Duodenum | hay     | Negative | abnormal morphology of muscle            | 2.62E-06 | 145  |
|          | Alfalfa |          |                                          |          |      |
| Duodenum | hay     | Negative | differentiation of muscle                | 2.71E-06 | 139  |
|          | Alfalfa |          |                                          |          |      |
| Duodenum | hay     | Negative | proliferation of T lymphocytes           | 2.71E-06 | 266  |
|          | Alfalfa |          |                                          |          |      |
| Duodenum | hay     | Negative | tumorigenesis of gonad                   | 2.80E-06 | 350  |
|          | Alfalfa |          |                                          |          |      |
| Duodenum | hay     | Negative | growth of lymphatic system component     | 2.81E-06 | 92   |
|          | Alfalfa |          |                                          |          |      |
| Duodenum | hay     | Negative | branching of neurons                     | 2.83E-06 | 132  |
|          | Alfalfa |          |                                          |          |      |
| Duodenum | hay     | Negative | activation of blood cells                | 2.84E-06 | 325  |
|          | Alfalfa |          |                                          |          |      |
| Duodenum | hay     | Negative | apoptosis of cervical cancer cell lines  | 3.02E-06 | 130  |
|          | Alfalfa |          |                                          |          |      |
| Duodenum | hay     | Negative | activation of neuroglia                  | 3.02E-06 | 66   |
|          | Alfalfa |          |                                          |          |      |
| Duodenum | hay     | Negative | differentiation of bone cells            | 3.19E-06 | 183  |
|          | Alfalfa |          |                                          |          |      |
| Duodenum | hay     | Negative | proliferation of epithelial cells        | 3.21E-06 | 219  |
|          | Alfalfa |          |                                          |          |      |
| Duodenum | hay     | Negative | formation of thymus gland                | 3.37E-06 | 79   |
|          | Alfalfa |          |                                          |          |      |
| Duodenum | hay     | Negative | apoptosis of blood cells                 | 3.50E-06 | 220  |
|          | Alfalfa |          |                                          |          |      |
| Duodenum | hay     | Negative | formation of blood cells                 | 3.52E-06 | 94   |
|          | Alfalfa |          |                                          |          |      |
| Duodenum | hay     | Negative | cell death of neuroblastoma cell lines   | 3.56E-06 | 92   |
|          | Alfalfa |          |                                          |          |      |
| Duodenum | hay     | Negative | glucose metabolism disorder              | 3.62E-06 | 541  |
|          | Alfalfa |          |                                          |          |      |
| Duodenum | hay     | Negative | autophagy                                | 3.71E-06 | 169  |
|          | Alfalfa |          |                                          |          |      |
| Duodenum | hay     | Negative | apoptosis of pheochromocytoma cell lines | 3.81E-06 | 48   |
|          | Alfalfa |          |                                          |          |      |
| Duodenum | hay     | Negative | function of antigen presenting cells     | 3.88E-06 | 114  |
| Duodenum | Alfalfa | Negative | abnormal morphology of skull             | 3.95E-06 | 103  |

|          |         |          |                                             |          |      |
|----------|---------|----------|---------------------------------------------|----------|------|
|          | hay     |          |                                             |          |      |
|          | Alfalfa |          |                                             |          |      |
| Duodenum | hay     | Negative | infection of embryonic cell lines           | 3.95E-06 | 127  |
|          | Alfalfa |          |                                             |          |      |
| Duodenum | hay     | Negative | infection of epithelial cell lines          | 3.95E-06 | 127  |
|          | Alfalfa |          |                                             |          |      |
| Duodenum | hay     | Negative | abdominal carcinoma                         | 3.95E-06 | 2375 |
|          | Alfalfa |          |                                             |          |      |
| Duodenum | hay     | Negative | differentiation of bone                     | 4.03E-06 | 184  |
|          | Alfalfa |          |                                             |          |      |
| Duodenum | hay     | Negative | respiratory system development              | 4.06E-06 | 155  |
|          | Alfalfa |          |                                             |          |      |
| Duodenum | hay     | Negative | cell movement of neutrophils                | 4.22E-06 | 136  |
|          | Alfalfa |          |                                             |          |      |
| Duodenum | hay     | Negative | morphology of blood cells                   | 4.25E-06 | 186  |
|          | Alfalfa |          |                                             |          |      |
| Duodenum | hay     | Negative | morphology of lymphoid organ                | 4.26E-06 | 176  |
|          | Alfalfa |          |                                             |          |      |
| Duodenum | hay     | Negative | metabolism of phospholipid                  | 4.29E-06 | 109  |
|          | Alfalfa |          |                                             |          |      |
| Duodenum | hay     | Negative | concentration of triacylglycerol            | 4.32E-06 | 140  |
|          | Alfalfa |          |                                             |          |      |
| Duodenum | hay     | Negative | chemotaxis of phagocytes                    | 4.32E-06 | 135  |
|          | Alfalfa |          |                                             |          |      |
| Duodenum | hay     | Negative | hypertrophy of heart                        | 4.36E-06 | 153  |
|          | Alfalfa |          |                                             |          |      |
| Duodenum | hay     | Negative | mass of adipose tissue                      | 4.45E-06 | 90   |
|          | Alfalfa |          |                                             |          |      |
| Duodenum | hay     | Negative | proliferation of prostate cancer cell lines | 4.46E-06 | 139  |
|          | Alfalfa |          |                                             |          |      |
| Duodenum | hay     | Negative | ovarian cancer                              | 4.47E-06 | 309  |
|          | Alfalfa |          |                                             |          |      |
| Duodenum | hay     | Negative | abnormal morphology of skin                 | 4.76E-06 | 113  |
|          | Alfalfa |          |                                             |          |      |
| Duodenum | hay     | Negative | atrophy of muscle                           | 4.93E-06 | 72   |
|          | Alfalfa |          |                                             |          |      |
| Duodenum | hay     | Negative | modification of peptide                     | 4.96E-06 | 54   |
|          | Alfalfa |          |                                             |          |      |
| Duodenum | hay     | Negative | outgrowth of plasma membrane projections    | 5.02E-06 | 182  |
|          | Alfalfa |          |                                             |          |      |
| Duodenum | hay     | Negative | adenoma                                     | 5.03E-06 | 243  |
|          | Alfalfa |          |                                             |          |      |
| Duodenum | hay     | Negative | infection of kidney cell lines              | 5.08E-06 | 130  |
| Duodenum | Alfalfa | Negative | quantity of metal ion                       | 5.10E-06 | 197  |

|          |         |          |                                                 |          |      |
|----------|---------|----------|-------------------------------------------------|----------|------|
|          | hay     |          |                                                 |          |      |
|          | Alfalfa |          |                                                 |          |      |
| Duodenum | hay     | Negative | homing of blood cells                           | 5.46E-06 | 170  |
|          | Alfalfa |          |                                                 |          |      |
| Duodenum | hay     | Negative | neurodegeneration of axons                      | 5.46E-06 | 45   |
|          | Alfalfa |          |                                                 |          |      |
| Duodenum | hay     | Negative | cell death of pheochromocytoma cell lines       | 5.46E-06 | 60   |
|          | Alfalfa |          |                                                 |          |      |
| Duodenum | hay     | Negative | Bleeding                                        | 5.58E-06 | 189  |
|          | Alfalfa |          |                                                 |          |      |
| Duodenum | hay     | Negative | branching of neurites                           | 5.58E-06 | 127  |
|          | Alfalfa |          |                                                 |          |      |
| Duodenum | hay     | Negative | cell death of immune cells                      | 5.61E-06 | 287  |
|          | Alfalfa |          |                                                 |          |      |
| Duodenum | hay     | Negative | abnormal morphology of snout                    | 5.76E-06 | 36   |
|          | Alfalfa |          |                                                 |          |      |
| Duodenum | hay     | Negative | liver cancer                                    | 5.96E-06 | 1728 |
|          | Alfalfa |          |                                                 |          |      |
| Duodenum | hay     | Negative | liver tumor                                     | 6.13E-06 | 1739 |
|          | Alfalfa |          |                                                 |          |      |
| Duodenum | hay     | Negative | liver lesion                                    | 6.16E-06 | 1740 |
|          | Alfalfa |          |                                                 |          |      |
| Duodenum | hay     | Negative | quantity of cytokine                            | 6.26E-06 | 117  |
|          | Alfalfa |          |                                                 |          |      |
| Duodenum | hay     | Negative | cell movement of endothelial cells              | 6.36E-06 | 159  |
|          | Alfalfa |          |                                                 |          |      |
| Duodenum | hay     | Negative | shape change of neurons                         | 6.49E-06 | 133  |
|          | Alfalfa |          |                                                 |          |      |
| Duodenum | hay     | Negative | differentiation of epithelial cells             | 6.57E-06 | 142  |
|          | Alfalfa |          |                                                 |          |      |
| Duodenum | hay     | Negative | function of mononuclear leukocytes              | 6.67E-06 | 154  |
|          | Alfalfa |          | intermediate disease stage peripheral arterial  |          |      |
| Duodenum | hay     | Negative | disease                                         | 6.86E-06 | 76   |
|          | Alfalfa |          |                                                 |          |      |
| Duodenum | hay     | Negative | chronic myeloid leukemia                        | 6.92E-06 | 54   |
|          | Alfalfa |          |                                                 |          |      |
| Duodenum | hay     | Negative | engulfment of leukocytes                        | 6.92E-06 | 77   |
|          | Alfalfa |          |                                                 |          |      |
| Duodenum | hay     | Negative | hereditary neuropathy                           | 7.04E-06 | 79   |
|          | Alfalfa |          |                                                 |          |      |
| Duodenum | hay     | Negative | size of embryo                                  | 7.07E-06 | 160  |
|          | Alfalfa |          |                                                 |          |      |
| Duodenum | hay     | Negative | proliferation of hematopoietic progenitor cells | 7.10E-06 | 112  |
| Duodenum | Alfalfa | Negative | chronic inflammatory disorder                   | 7.44E-06 | 414  |



|          |         |          |                                       |          |     |
|----------|---------|----------|---------------------------------------|----------|-----|
|          | hay     |          |                                       |          |     |
|          | Alfalfa |          |                                       |          |     |
| Duodenum | hay     | Negative | differentiation of lymphocytes        | 7.54E-06 | 219 |
|          | Alfalfa |          |                                       |          |     |
| Duodenum | hay     | Negative | abnormal morphology of lymphoid organ | 7.55E-06 | 169 |
|          | Alfalfa |          |                                       |          |     |
| Duodenum | hay     | Negative | quantity of trophoblast giant cells   | 7.66E-06 | 23  |
|          | Alfalfa |          |                                       |          |     |
| Duodenum | hay     | Negative | repair of DNA                         | 7.94E-06 | 132 |
|          | Alfalfa |          |                                       |          |     |
| Duodenum | hay     | Negative | production of antibody                | 7.97E-06 | 141 |
|          | Alfalfa |          |                                       |          |     |
| Duodenum | hay     | Negative | autophagy of cells                    | 7.97E-06 | 121 |
|          | Alfalfa |          |                                       |          |     |
| Duodenum | hay     | Negative | cell death of fibroblasts             | 7.97E-06 | 121 |
|          | Alfalfa |          |                                       |          |     |
| Duodenum | hay     | Negative | function of lymphocytes               | 8.02E-06 | 153 |
|          | Alfalfa |          |                                       |          |     |
| Duodenum | hay     | Negative | cell movement of carcinoma cell lines | 8.02E-06 | 96  |
|          | Alfalfa |          |                                       |          |     |
| Duodenum | hay     | Negative | formation of lymphocytes              | 8.07E-06 | 62  |
|          | Alfalfa |          |                                       |          |     |
| Duodenum | hay     | Negative | binding of protein binding site       | 8.12E-06 | 131 |
|          | Alfalfa |          |                                       |          |     |
| Duodenum | hay     | Negative | production of protein                 | 8.34E-06 | 148 |
|          | Alfalfa |          |                                       |          |     |
| Duodenum | hay     | Negative | morphology of skull                   | 8.50E-06 | 104 |
|          | Alfalfa |          |                                       |          |     |
| Duodenum | hay     | Negative | Hypertension                          | 8.52E-06 | 278 |
|          | Alfalfa |          |                                       |          |     |
| Duodenum | hay     | Negative | morphology of genital organ           | 8.59E-06 | 188 |
|          | Alfalfa |          |                                       |          |     |
| Duodenum | hay     | Negative | formation of mononuclear leukocytes   | 8.73E-06 | 64  |
|          | Alfalfa |          |                                       |          |     |
| Duodenum | hay     | Negative | quantity of sphingolipid              | 8.80E-06 | 53  |
|          | Alfalfa |          |                                       |          |     |
| Duodenum | hay     | Negative | abnormal morphology of lung           | 8.82E-06 | 86  |
|          | Alfalfa |          |                                       |          |     |
| Duodenum | hay     | Negative | engulfment of blood cells             | 8.89E-06 | 81  |
|          | Alfalfa |          |                                       |          |     |
| Duodenum | hay     | Negative | release of L-amino acid               | 8.89E-06 | 43  |
|          | Alfalfa |          |                                       |          |     |
| Duodenum | hay     | Negative | differentiation of muscle cells       | 8.90E-06 | 128 |
| Duodenum | Alfalfa | Negative | homing of leukocytes                  | 8.90E-06 | 168 |

|          |         |          |                                                |          |     |
|----------|---------|----------|------------------------------------------------|----------|-----|
|          | hay     |          |                                                |          |     |
|          | Alfalfa |          |                                                |          |     |
| Duodenum | hay     | Negative | growth of skin                                 | 8.91E-06 | 101 |
|          | Alfalfa |          |                                                |          |     |
| Duodenum | hay     | Negative | quantity of subcutaneous fat                   | 9.08E-06 | 34  |
|          | Alfalfa |          |                                                |          |     |
| Duodenum | hay     | Negative | metabolism of DNA                              | 9.19E-06 | 177 |
|          | Alfalfa |          |                                                |          |     |
| Duodenum | hay     | Negative | abnormal morphology of blood vessel            | 9.35E-06 | 121 |
|          | Alfalfa |          |                                                |          |     |
| Duodenum | hay     | Negative | development of sensory organ                   | 9.43E-06 | 246 |
|          | Alfalfa |          |                                                |          |     |
| Duodenum | hay     | Negative | breast cancer                                  | 9.76E-06 | 634 |
|          | Alfalfa |          |                                                |          |     |
| Duodenum | hay     | Negative | quantity of macrophages                        | 1.01E-05 | 94  |
|          | Alfalfa |          |                                                |          |     |
| Duodenum | hay     | Negative | quantity of immunoglobulin                     | 1.01E-05 | 134 |
|          | Alfalfa |          |                                                |          |     |
| Duodenum | hay     | Negative | concentration of sterol                        | 1.03E-05 | 138 |
|          | Alfalfa |          |                                                |          |     |
| Duodenum | hay     | Negative | abnormal morphology of type II pneumocytes     | 1.03E-05 | 19  |
|          | Alfalfa |          |                                                |          |     |
| Duodenum | hay     | Negative | familial Alzheimer's disease                   | 1.03E-05 | 19  |
|          | Alfalfa |          |                                                |          |     |
| Duodenum | hay     | Negative | length of cells                                | 1.03E-05 | 51  |
|          | Alfalfa |          |                                                |          |     |
| Duodenum | hay     | Negative | morphology of heart ventricle                  | 1.05E-05 | 90  |
|          | Alfalfa |          |                                                |          |     |
| Duodenum | hay     | Negative | exocytosis                                     | 1.06E-05 | 89  |
|          | Alfalfa |          |                                                |          |     |
| Duodenum | hay     | Negative | growth of liver                                | 1.06E-05 | 89  |
|          | Alfalfa |          |                                                |          |     |
| Duodenum | hay     | Negative | cell viability of central nervous system cells | 1.06E-05 | 56  |
|          | Alfalfa |          |                                                |          |     |
| Duodenum | hay     | Negative | migration of connective tissue cells           | 1.10E-05 | 85  |
|          | Alfalfa |          |                                                |          |     |
| Duodenum | hay     | Negative | outgrowth of neurites                          | 1.10E-05 | 179 |
|          | Alfalfa |          |                                                |          |     |
| Duodenum | hay     | Negative | differentiation of muscle cell lines           | 1.10E-05 | 77  |
|          | Alfalfa |          |                                                |          |     |
| Duodenum | hay     | Negative | function of macrophages                        | 1.10E-05 | 84  |
|          | Alfalfa |          |                                                |          |     |
| Duodenum | hay     | Negative | contractility of heart                         | 1.10E-05 | 83  |
| Duodenum | Alfalfa | Negative | phosphorylation of L-tyrosine                  | 1.10E-05 | 83  |

|          |         |          |                                           |          |     |
|----------|---------|----------|-------------------------------------------|----------|-----|
|          | hay     |          |                                           |          |     |
|          | Alfalfa |          |                                           |          |     |
| Duodenum | hay     | Negative | proliferation of endothelial cells        | 1.10E-05 | 140 |
|          | Alfalfa |          |                                           |          |     |
| Duodenum | hay     | Negative | urination disorder                        | 1.10E-05 | 131 |
|          | Alfalfa |          |                                           |          |     |
| Duodenum | hay     | Negative | cellular infiltration                     | 1.13E-05 | 193 |
|          | Alfalfa |          |                                           |          |     |
| Duodenum | hay     | Negative | arrest in interphase                      | 1.14E-05 | 184 |
|          | Alfalfa |          |                                           |          |     |
| Duodenum | hay     | Negative | congenital heart disease                  | 1.16E-05 | 97  |
|          | Alfalfa |          |                                           |          |     |
| Duodenum | hay     | Negative | Breast Cancer and Tumors                  | 1.19E-05 | 635 |
|          | Alfalfa |          |                                           |          |     |
| Duodenum | hay     | Negative | cleavage of lipid                         | 1.24E-05 | 93  |
|          | Alfalfa |          |                                           |          |     |
| Duodenum | hay     | Negative | abnormal morphology of internal genitalia | 1.25E-05 | 156 |
|          | Alfalfa |          |                                           |          |     |
| Duodenum | hay     | Negative | advanced stage solid tumor                | 1.26E-05 | 225 |
|          | Alfalfa |          |                                           |          |     |
| Duodenum | hay     | Negative | cell death of liver cells                 | 1.27E-05 | 91  |
|          | Alfalfa |          |                                           |          |     |
| Duodenum | hay     | Negative | invasion of tissue                        | 1.27E-05 | 91  |
|          | Alfalfa |          |                                           |          |     |
| Duodenum | hay     | Negative | apoptosis of neuroblastoma cell lines     | 1.29E-05 | 60  |
|          | Alfalfa |          |                                           |          |     |
| Duodenum | hay     | Negative | proliferation of liver cells              | 1.32E-05 | 88  |
|          | Alfalfa |          |                                           |          |     |
| Duodenum | hay     | Negative | metabolism of peptide                     | 1.34E-05 | 87  |
|          | Alfalfa |          |                                           |          |     |
| Duodenum | hay     | Negative | multiple congenital anomalies             | 1.36E-05 | 186 |
|          | Alfalfa |          |                                           |          |     |
| Duodenum | hay     | Negative | morphology of cardiomyocytes              | 1.42E-05 | 47  |
|          | Alfalfa |          |                                           |          |     |
| Duodenum | hay     | Negative | release of L-glutamic acid                | 1.45E-05 | 41  |
|          | Alfalfa |          |                                           |          |     |
| Duodenum | hay     | Negative | cell death of T lymphocytes               | 1.45E-05 | 141 |
|          | Alfalfa |          |                                           |          |     |
| Duodenum | hay     | Negative | development of genitourinary system       | 1.46E-05 | 377 |
|          | Alfalfa |          |                                           |          |     |
| Duodenum | hay     | Negative | quantity of IL-6 in blood                 | 1.47E-05 | 44  |
|          | Alfalfa |          |                                           |          |     |
| Duodenum | hay     | Negative | leukopenia                                | 1.49E-05 | 64  |
| Duodenum | Alfalfa | Negative | morphology of mouth                       | 1.53E-05 | 65  |

|          |         |          |                                          |          |      |
|----------|---------|----------|------------------------------------------|----------|------|
|          | hay     |          |                                          |          |      |
|          | Alfalfa |          |                                          |          |      |
| Duodenum | hay     | Negative | stage 3 cancer                           | 1.53E-05 | 65   |
|          | Alfalfa |          |                                          |          |      |
| Duodenum | hay     | Negative | quantity of myeloid cells                | 1.54E-05 | 158  |
|          | Alfalfa |          |                                          |          |      |
| Duodenum | hay     | Negative | metastatic gastrointestinal tract cancer | 1.55E-05 | 102  |
|          | Alfalfa |          |                                          |          |      |
| Duodenum | hay     | Negative | abnormal morphology of genital organ     | 1.55E-05 | 180  |
|          | Alfalfa |          |                                          |          |      |
| Duodenum | hay     | Negative | experimentally-induced diabetes          | 1.55E-05 | 48   |
|          | Alfalfa |          |                                          |          |      |
| Duodenum | hay     | Negative | metabolism of nucleoside triphosphate    | 1.60E-05 | 67   |
|          | Alfalfa |          |                                          |          |      |
| Duodenum | hay     | Negative | biosynthesis of nucleoside triphosphate  | 1.64E-05 | 53   |
|          | Alfalfa |          |                                          |          |      |
| Duodenum | hay     | Negative | development of hematopoietic system      | 1.68E-05 | 113  |
|          | Alfalfa |          |                                          |          |      |
| Duodenum | hay     | Negative | shape change of neurites                 | 1.71E-05 | 128  |
|          | Alfalfa |          |                                          |          |      |
| Duodenum | hay     | Negative | production of reactive oxygen species    | 1.73E-05 | 162  |
|          | Rice    |          |                                          |          |      |
| Duodenum | straw   | Positive | cancer                                   | 1.42E-34 | 2894 |
|          | Rice    |          |                                          |          |      |
| Duodenum | straw   | Positive | malignant solid tumor                    | 6.33E-34 | 2861 |
|          | Rice    |          |                                          |          |      |
| Duodenum | straw   | Positive | organismal death                         | 9.10E-29 | 788  |
|          | Rice    |          |                                          |          |      |
| Duodenum | straw   | Positive | morbidity or mortality                   | 6.12E-28 | 793  |
|          | Rice    |          |                                          |          |      |
| Duodenum | straw   | Positive | proliferation of cells                   | 2.85E-25 | 1115 |
|          | Rice    |          |                                          |          |      |
| Duodenum | straw   | Positive | tumorigenesis of tissue                  | 7.77E-22 | 2413 |
|          | Rice    |          |                                          |          |      |
| Duodenum | straw   | Positive | epithelial cancer                        | 5.10E-21 | 2353 |
|          | Rice    |          |                                          |          |      |
| Duodenum | straw   | Positive | morphology of cells                      | 5.10E-21 | 631  |
|          | Rice    |          |                                          |          |      |
| Duodenum | straw   | Positive | neoplasia of epithelial tissue           | 2.10E-20 | 2369 |
|          | Rice    |          |                                          |          |      |
| Duodenum | straw   | Positive | apoptosis                                | 1.36E-19 | 811  |
|          | Rice    |          |                                          |          |      |
| Duodenum | straw   | Positive | cell death                               | 1.08E-18 | 987  |
| Duodenum | Rice    | Positive | necrosis                                 | 1.98E-18 | 786  |

|          |       |          |                                     |          |      |
|----------|-------|----------|-------------------------------------|----------|------|
|          | straw |          |                                     |          |      |
|          | Rice  |          |                                     |          |      |
| Duodenum | straw | Positive | expression of RNA                   | 5.24E-18 | 671  |
|          | Rice  |          |                                     |          |      |
| Duodenum | straw | Positive | transcription                       | 8.28E-18 | 629  |
|          | Rice  |          |                                     |          |      |
| Duodenum | straw | Positive | abdominal neoplasm                  | 9.84E-18 | 2336 |
|          | Rice  |          |                                     |          |      |
| Duodenum | straw | Positive | cell movement                       | 9.84E-18 | 664  |
|          | Rice  |          |                                     |          |      |
| Duodenum | straw | Positive | differentiation of cells            | 9.26E-17 | 692  |
|          | Rice  |          |                                     |          |      |
| Duodenum | straw | Positive | angiogenesis                        | 9.26E-17 | 320  |
|          | Rice  |          |                                     |          |      |
| Duodenum | straw | Positive | quantity of cells                   | 1.50E-16 | 561  |
|          | Rice  |          |                                     |          |      |
| Duodenum | straw | Positive | abdominal cancer                    | 4.94E-16 | 2300 |
|          | Rice  |          |                                     |          |      |
| Duodenum | straw | Positive | transcription of RNA                | 6.40E-16 | 582  |
|          | Rice  |          |                                     |          |      |
| Duodenum | straw | Positive | transport of molecule               | 6.67E-16 | 515  |
|          | Rice  |          |                                     |          |      |
| Duodenum | straw | Positive | organization of cytoplasm           | 1.88E-15 | 491  |
|          | Rice  |          |                                     |          |      |
| Duodenum | straw | Positive | migration of cells                  | 4.00E-15 | 590  |
|          | Rice  |          |                                     |          |      |
| Duodenum | straw | Positive | abnormal morphology of cells        | 5.24E-15 | 415  |
|          | Rice  |          |                                     |          |      |
| Duodenum | straw | Positive | Growth Failure                      | 4.24E-14 | 218  |
|          | Rice  |          |                                     |          |      |
| Duodenum | straw | Positive | cellular homeostasis                | 2.31E-13 | 478  |
|          | Rice  |          |                                     |          |      |
| Duodenum | straw | Positive | organization of cytoskeleton        | 4.41E-13 | 442  |
|          | Rice  |          |                                     |          |      |
| Duodenum | straw | Positive | size of body                        | 1.02E-12 | 288  |
|          | Rice  |          |                                     |          |      |
| Duodenum | straw | Positive | morphology of cardiovascular system | 1.67E-12 | 219  |
|          | Rice  |          |                                     |          |      |
| Duodenum | straw | Positive | quantity of leukocytes              | 2.63E-12 | 305  |
|          | Rice  |          |                                     |          |      |
| Duodenum | straw | Positive | vasculogenesis                      | 2.65E-12 | 253  |
|          | Rice  |          |                                     |          |      |
| Duodenum | straw | Positive | quantity of lymphocytes             | 3.17E-12 | 244  |
| Duodenum | Rice  | Positive | quantity of mononuclear leukocytes  | 3.60E-12 | 252  |

|          |       |          |                                              |          |      |
|----------|-------|----------|----------------------------------------------|----------|------|
|          | straw |          |                                              |          |      |
|          | Rice  |          |                                              |          |      |
| Duodenum | straw | Positive | cell movement of tumor cell lines            | 5.58E-12 | 285  |
|          | Rice  |          |                                              |          |      |
| Duodenum | straw | Positive | cell survival                                | 7.29E-12 | 435  |
|          | Rice  |          |                                              |          |      |
| Duodenum | straw | Positive | cell death of tumor cell lines               | 7.29E-12 | 471  |
|          | Rice  |          |                                              |          |      |
| Duodenum | straw | Positive | ubiquitination                               | 1.25E-11 | 129  |
|          | Rice  |          |                                              |          |      |
| Duodenum | straw | Positive | cell viability                               | 1.59E-11 | 408  |
|          | Rice  |          |                                              |          |      |
| Duodenum | straw | Positive | ubiquitination of protein                    | 1.65E-11 | 127  |
|          | Rice  |          |                                              |          |      |
| Duodenum | straw | Positive | protein kinase cascade                       | 1.65E-11 | 155  |
|          | Rice  |          |                                              |          |      |
| Duodenum | straw | Positive | abnormal morphology of cardiovascular system | 2.36E-11 | 199  |
|          | Rice  |          |                                              |          |      |
| Duodenum | straw | Positive | proliferation of connective tissue cells     | 3.41E-11 | 206  |
|          | Rice  |          |                                              |          |      |
| Duodenum | straw | Positive | quantity of blood cells                      | 3.63E-11 | 331  |
|          | Rice  |          |                                              |          |      |
| Duodenum | straw | Positive | transcription of DNA                         | 4.66E-11 | 469  |
|          | Rice  |          |                                              |          |      |
| Duodenum | straw | Positive | apoptosis of tumor cell lines                | 4.75E-11 | 381  |
|          | Rice  |          |                                              |          |      |
| Duodenum | straw | Positive | microtubule dynamics                         | 5.82E-11 | 373  |
|          | Rice  |          |                                              |          |      |
| Duodenum | straw | Positive | digestive organ tumor                        | 5.82E-11 | 1992 |
|          | Rice  |          |                                              |          |      |
| Duodenum | straw | Positive | digestive system cancer                      | 9.28E-11 | 1973 |
|          | Rice  |          |                                              |          |      |
| Duodenum | straw | Positive | growth of connective tissue                  | 1.20E-10 | 219  |
|          | Rice  |          |                                              |          |      |
| Duodenum | straw | Positive | Movement Disorders                           | 2.12E-10 | 336  |
|          | Rice  |          |                                              |          |      |
| Duodenum | straw | Positive | invasion of cells                            | 2.12E-10 | 283  |
|          | Rice  |          |                                              |          |      |
| Duodenum | straw | Positive | transactivation                              | 2.95E-10 | 198  |
|          | Rice  |          |                                              |          |      |
| Duodenum | straw | Positive | cell death of connective tissue cells        | 6.48E-10 | 204  |
|          | Rice  |          |                                              |          |      |
| Duodenum | straw | Positive | growth of organism                           | 7.63E-10 | 271  |
| Duodenum | Rice  | Positive | morphology of body cavity                    | 8.59E-10 | 370  |

|          |       |          |                                            |          |     |
|----------|-------|----------|--------------------------------------------|----------|-----|
|          | straw |          |                                            |          |     |
|          | Rice  |          |                                            |          |     |
| Duodenum | straw | Positive | cell transformation                        | 1.03E-09 | 161 |
|          | Rice  |          |                                            |          |     |
| Duodenum | straw | Positive | differentiation of connective tissue       | 1.03E-09 | 240 |
|          | Rice  |          |                                            |          |     |
| Duodenum | straw | Positive | quantity of T lymphocytes                  | 1.15E-09 | 183 |
|          | Rice  |          |                                            |          |     |
| Duodenum | straw | Positive | migration of tumor cell lines              | 1.21E-09 | 233 |
|          | Rice  |          |                                            |          |     |
| Duodenum | straw | Positive | abnormal morphology of thoracic cavity     | 1.25E-09 | 198 |
|          | Rice  |          |                                            |          |     |
| Duodenum | straw | Positive | cell death of epithelial cells             | 1.68E-09 | 171 |
|          | Rice  |          |                                            |          |     |
| Duodenum | straw | Positive | development of connective tissue           | 1.76E-09 | 133 |
|          | Rice  |          |                                            |          |     |
| Duodenum | straw | Positive | necrosis of epithelial tissue              | 1.76E-09 | 198 |
|          | Rice  |          |                                            |          |     |
| Duodenum | straw | Positive | binding of DNA                             | 1.78E-09 | 178 |
|          | Rice  |          |                                            |          |     |
| Duodenum | straw | Positive | Bleeding                                   | 1.86E-09 | 149 |
|          | Rice  |          |                                            |          |     |
| Duodenum | straw | Positive | development of vasculature                 | 2.24E-09 | 147 |
|          | Rice  |          |                                            |          |     |
| Duodenum | straw | Positive | morphology of heart                        | 2.38E-09 | 143 |
|          | Rice  |          |                                            |          |     |
| Duodenum | straw | Positive | perinatal death                            | 2.43E-09 | 199 |
|          | Rice  |          |                                            |          |     |
| Duodenum | straw | Positive | differentiation of connective tissue cells | 2.56E-09 | 213 |
|          | Rice  |          |                                            |          |     |
| Duodenum | straw | Positive | abnormal morphology of body cavity         | 3.63E-09 | 352 |
|          | Rice  |          |                                            |          |     |
| Duodenum | straw | Positive | degeneration of nervous system             | 4.08E-09 | 106 |
|          | Rice  |          |                                            |          |     |
| Duodenum | straw | Positive | transactivation of RNA                     | 4.59E-09 | 183 |
|          | Rice  |          |                                            |          |     |
| Duodenum | straw | Positive | formation of cells                         | 4.59E-09 | 308 |
|          | Rice  |          |                                            |          |     |
| Duodenum | straw | Positive | Organ Degeneration                         | 5.09E-09 | 168 |
|          | Rice  |          |                                            |          |     |
| Duodenum | straw | Positive | invasion of tumor cell lines               | 5.60E-09 | 218 |
|          | Rice  |          |                                            |          |     |
| Duodenum | straw | Positive | Neurodegeneration                          | 7.50E-09 | 112 |
| Duodenum | Rice  | Positive | morphology of bone                         | 1.04E-08 | 154 |

|          |       |          |                                       |          |      |
|----------|-------|----------|---------------------------------------|----------|------|
|          | straw |          |                                       |          |      |
|          | Rice  |          |                                       |          |      |
| Duodenum | straw | Positive | colony formation of cells             | 1.36E-08 | 166  |
|          | Rice  |          |                                       |          |      |
| Duodenum | straw | Positive | apoptosis of fibroblast cell lines    | 1.38E-08 | 117  |
|          | Rice  |          |                                       |          |      |
| Duodenum | straw | Positive | development of body trunk             | 2.02E-08 | 341  |
|          | Rice  |          |                                       |          |      |
| Duodenum | straw | Positive | colony formation                      | 2.55E-08 | 178  |
|          | Rice  |          |                                       |          |      |
| Duodenum | straw | Positive | abnormal morphology of nervous system | 2.70E-08 | 232  |
|          | Rice  |          |                                       |          |      |
| Duodenum | straw | Positive | apoptosis of epithelial cells         | 2.99E-08 | 103  |
|          | Rice  |          |                                       |          |      |
| Duodenum | straw | Positive | metabolism of DNA                     | 3.01E-08 | 137  |
|          | Rice  |          |                                       |          |      |
| Duodenum | straw | Positive | development of blood cells            | 3.31E-08 | 211  |
|          | Rice  |          |                                       |          |      |
| Duodenum | straw | Positive | quantity of B lymphocytes             | 3.41E-08 | 121  |
|          | Rice  |          |                                       |          |      |
| Duodenum | straw | Positive | growth of embryo                      | 3.42E-08 | 160  |
|          | Rice  |          |                                       |          |      |
| Duodenum | straw | Positive | morphology of nervous system          | 3.42E-08 | 248  |
|          | Rice  |          |                                       |          |      |
| Duodenum | straw | Positive | abnormal morphology of bone           | 3.44E-08 | 148  |
|          | Rice  |          |                                       |          |      |
| Duodenum | straw | Positive | neuronal cell death                   | 3.50E-08 | 219  |
|          | Rice  |          |                                       |          |      |
| Duodenum | straw | Positive | formation of cytoskeleton             | 3.53E-08 | 130  |
|          | Rice  |          |                                       |          |      |
| Duodenum | straw | Positive | function of cardiovascular system     | 3.63E-08 | 128  |
|          | Rice  |          |                                       |          |      |
| Duodenum | straw | Positive | organization of organelle             | 3.67E-08 | 178  |
|          | Rice  |          |                                       |          |      |
| Duodenum | straw | Positive | proliferation of tumor cell lines     | 3.76E-08 | 454  |
|          | Rice  |          |                                       |          |      |
| Duodenum | straw | Positive | proliferation of blood cells          | 3.92E-08 | 264  |
|          | Rice  |          |                                       |          |      |
| Duodenum | straw | Positive | S phase                               | 3.92E-08 | 95   |
|          | Rice  |          |                                       |          |      |
| Duodenum | straw | Positive | synthesis of lipid                    | 3.92E-08 | 228  |
|          | Rice  |          |                                       |          |      |
| Duodenum | straw | Positive | adenocarcinoma                        | 4.44E-08 | 1718 |
| Duodenum | Rice  | Positive | development of epithelial tissue      | 4.45E-08 | 171  |



|          |       |          |                                              |          |      |
|----------|-------|----------|----------------------------------------------|----------|------|
|          | straw |          |                                              |          |      |
|          | Rice  |          |                                              |          |      |
| Duodenum | straw | Positive | proliferation of neuronal cells              | 4.94E-08 | 188  |
|          | Rice  |          |                                              |          |      |
| Duodenum | straw | Positive | apoptosis of leukocytes                      | 6.23E-08 | 153  |
|          | Rice  |          |                                              |          |      |
| Duodenum | straw | Positive | proliferation of fibroblast cell lines       | 6.69E-08 | 143  |
|          | Rice  |          |                                              |          |      |
| Duodenum | straw | Positive | development of leukocytes                    | 6.97E-08 | 191  |
|          | Rice  |          |                                              |          |      |
| Duodenum | straw | Positive | apoptosis of blood cells                     | 6.97E-08 | 164  |
|          | Rice  |          |                                              |          |      |
| Duodenum | straw | Positive | development of cytoplasm                     | 8.05E-08 | 154  |
|          | Rice  |          |                                              |          |      |
| Duodenum | straw | Positive | congenital anomaly of musculoskeletal system | 1.08E-07 | 232  |
|          | Rice  |          |                                              |          |      |
| Duodenum | straw | Positive | activation of cells                          | 1.09E-07 | 299  |
|          | Rice  |          |                                              |          |      |
| Duodenum | straw | Positive | abdominal adenocarcinoma                     | 1.13E-07 | 1566 |
|          | Rice  |          |                                              |          |      |
| Duodenum | straw | Positive | quantity of connective tissue                | 1.18E-07 | 194  |
|          | Rice  |          |                                              |          |      |
| Duodenum | straw | Positive | generation of blood cells                    | 1.31E-07 | 64   |
|          | Rice  |          |                                              |          |      |
| Duodenum | straw | Positive | generation of leukocytes                     | 1.31E-07 | 63   |
|          | Rice  |          |                                              |          |      |
| Duodenum | straw | Positive | morphology of cardiovascular tissue          | 1.31E-07 | 39   |
|          | Rice  |          |                                              |          |      |
| Duodenum | straw | Positive | development of lymphatic system              | 1.35E-07 | 122  |
|          | Rice  |          |                                              |          |      |
| Duodenum | straw | Positive | cell cycle progression                       | 1.37E-07 | 317  |
|          | Rice  |          |                                              |          |      |
| Duodenum | straw | Positive | function of blood cells                      | 1.37E-07 | 189  |
|          | Rice  |          |                                              |          |      |
| Duodenum | straw | Positive | proliferation of lymphatic system cells      | 1.40E-07 | 75   |
|          | Rice  |          |                                              |          |      |
| Duodenum | straw | Positive | quantity of lymphatic system component       | 1.53E-07 | 128  |
|          | Rice  |          |                                              |          |      |
| Duodenum | straw | Positive | activation of DNA endogenous promoter        | 1.89E-07 | 360  |
|          | Rice  |          |                                              |          |      |
| Duodenum | straw | Positive | morphology of respiratory system             | 1.89E-07 | 108  |
|          | Rice  |          |                                              |          |      |
| Duodenum | straw | Positive | morphology of connective tissue              | 1.92E-07 | 152  |
| Duodenum | Rice  | Positive | apoptosis of muscle                          | 2.03E-07 | 93   |

|          |       |          |                                         |          |      |
|----------|-------|----------|-----------------------------------------|----------|------|
|          | straw |          |                                         |          |      |
|          | Rice  |          |                                         |          |      |
| Duodenum | straw | Positive | generation of lymphocytes               | 2.03E-07 | 56   |
|          | Rice  |          |                                         |          |      |
| Duodenum | straw | Positive | function of leukocytes                  | 2.06E-07 | 174  |
|          | Rice  |          |                                         |          |      |
| Duodenum | straw | Positive | demyelination of central nervous system | 2.14E-07 | 24   |
|          | Rice  |          |                                         |          |      |
| Duodenum | straw | Positive | morphology of skin                      | 2.21E-07 | 96   |
|          | Rice  |          |                                         |          |      |
| Duodenum | straw | Positive | mitosis                                 | 2.21E-07 | 162  |
|          | Rice  |          |                                         |          |      |
| Duodenum | straw | Positive | differentiation of epithelial tissue    | 2.22E-07 | 122  |
|          | Rice  |          |                                         |          |      |
| Duodenum | straw | Positive | abnormal morphology of heart            | 2.26E-07 | 129  |
|          | Rice  |          |                                         |          |      |
| Duodenum | straw | Positive | Viral Infection                         | 2.32E-07 | 465  |
|          | Rice  |          |                                         |          |      |
| Duodenum | straw | Positive | female genital neoplasm                 | 2.38E-07 | 970  |
|          | Rice  |          |                                         |          |      |
| Duodenum | straw | Positive | quantity of thymus gland                | 2.54E-07 | 84   |
|          | Rice  |          |                                         |          |      |
| Duodenum | straw | Positive | synthesis of nitric oxide               | 2.73E-07 | 97   |
|          | Rice  |          |                                         |          |      |
| Duodenum | straw | Positive | apoptosis of neurons                    | 2.73E-07 | 144  |
|          | Rice  |          |                                         |          |      |
| Duodenum | straw | Positive | apoptosis of muscle cells               | 2.87E-07 | 92   |
|          | Rice  |          |                                         |          |      |
| Duodenum | straw | Positive | degeneration of cells                   | 2.95E-07 | 117  |
|          | Rice  |          |                                         |          |      |
| Duodenum | straw | Positive | interphase                              | 3.03E-07 | 207  |
|          | Rice  |          |                                         |          |      |
| Duodenum | straw | Positive | hepatocellular carcinoma                | 3.03E-07 | 1129 |
|          | Rice  |          |                                         |          |      |
| Duodenum | straw | Positive | proliferation of immune cells           | 3.05E-07 | 245  |
|          | Rice  |          |                                         |          |      |
| Duodenum | straw | Positive | neuromuscular disease                   | 3.17E-07 | 270  |
|          | Rice  |          |                                         |          |      |
| Duodenum | straw | Positive | quantity of lymphoid organ              | 3.18E-07 | 106  |
|          | Rice  |          |                                         |          |      |
| Duodenum | straw | Positive | abnormal morphology of abdomen          | 3.53E-07 | 268  |
|          | Rice  |          |                                         |          |      |
| Duodenum | straw | Positive | sprouting                               | 3.60E-07 | 129  |
| Duodenum | Rice  | Positive | morphology of reproductive system       | 3.95E-07 | 172  |

|          |       |          |                                            |          |      |
|----------|-------|----------|--------------------------------------------|----------|------|
|          | straw |          |                                            |          |      |
|          | Rice  |          |                                            |          |      |
| Duodenum | straw | Positive | growth of plasma membrane projections      | 4.42E-07 | 152  |
|          | Rice  |          |                                            |          |      |
| Duodenum | straw | Positive | disorder of basal ganglia                  | 4.68E-07 | 237  |
|          | Rice  |          |                                            |          |      |
| Duodenum | straw | Positive | behavior                                   | 4.68E-07 | 298  |
|          | Rice  |          |                                            |          |      |
| Duodenum | straw | Positive | cell movement of fibroblasts               | 4.75E-07 | 68   |
|          | Rice  |          |                                            |          |      |
| Duodenum | straw | Positive | morphology of head                         | 4.85E-07 | 267  |
|          | Rice  |          |                                            |          |      |
| Duodenum | straw | Positive | cell death of hepatocytes                  | 4.88E-07 | 59   |
|          | Rice  |          |                                            |          |      |
| Duodenum | straw | Positive | abnormal morphology of head                | 4.96E-07 | 255  |
|          | Rice  |          |                                            |          |      |
| Duodenum | straw | Positive | abnormal morphology of reproductive system | 4.96E-07 | 164  |
|          | Rice  |          |                                            |          |      |
| Duodenum | straw | Positive | activation of enzyme                       | 5.12E-07 | 129  |
|          | Rice  |          |                                            |          |      |
| Duodenum | straw | Positive | abnormal morphology of respiratory system  | 5.21E-07 | 105  |
|          | Rice  |          |                                            |          |      |
| Duodenum | straw | Positive | cell death of blood cells                  | 5.63E-07 | 216  |
|          | Rice  |          |                                            |          |      |
| Duodenum | straw | Positive | migration of connective tissue cells       | 5.92E-07 | 67   |
|          | Rice  |          |                                            |          |      |
| Duodenum | straw | Positive | cell death of fibroblast cell lines        | 6.02E-07 | 140  |
|          | Rice  |          |                                            |          |      |
| Duodenum | straw | Positive | quantity of thymocytes                     | 6.51E-07 | 82   |
|          | Rice  |          |                                            |          |      |
| Duodenum | straw | Positive | differentiation of bone cells              | 6.61E-07 | 134  |
|          | Rice  |          |                                            |          |      |
| Duodenum | straw | Positive | cell death of T lymphocytes                | 6.66E-07 | 107  |
|          | Rice  |          |                                            |          |      |
| Duodenum | straw | Positive | differentiation of bone                    | 6.72E-07 | 135  |
|          | Rice  |          |                                            |          |      |
| Duodenum | straw | Positive | branching of cells                         | 6.80E-07 | 123  |
|          | Rice  |          |                                            |          |      |
| Duodenum | straw | Positive | skin abnormality                           | 6.80E-07 | 81   |
|          | Rice  |          |                                            |          |      |
| Duodenum | straw | Positive | cell death of fibroblasts                  | 6.93E-07 | 92   |
|          | Rice  |          |                                            |          |      |
| Duodenum | straw | Positive | genital tumor                              | 7.20E-07 | 1088 |
| Duodenum | Rice  | Positive | binding of protein binding site            | 7.20E-07 | 99   |

|          |       |          |                                           |          |     |
|----------|-------|----------|-------------------------------------------|----------|-----|
|          | straw |          |                                           |          |     |
|          | Rice  |          |                                           |          |     |
| Duodenum | straw | Positive | size of animal                            | 7.27E-07 | 66  |
|          | Rice  |          |                                           |          |     |
| Duodenum | straw | Positive | formation of skin                         | 7.27E-07 | 122 |
|          | Rice  |          |                                           |          |     |
| Duodenum | straw | Positive | phosphorylation of protein                | 7.36E-07 | 227 |
|          | Rice  |          |                                           |          |     |
| Duodenum | straw | Positive | development of lymphatic system component | 7.61E-07 | 105 |
|          | Rice  |          |                                           |          |     |
| Duodenum | straw | Positive | neonatal death                            | 7.63E-07 | 143 |
|          | Rice  |          |                                           |          |     |
| Duodenum | straw | Positive | morphology of endothelial tissue          | 7.99E-07 | 36  |
|          | Rice  |          |                                           |          |     |
| Duodenum | straw | Positive | cell death of liver                       | 8.96E-07 | 84  |
|          | Rice  |          |                                           |          |     |
| Duodenum | straw | Positive | cell movement of connective tissue cells  | 8.96E-07 | 79  |
|          | Rice  |          |                                           |          |     |
| Duodenum | straw | Positive | cognition                                 | 9.08E-07 | 147 |
|          | Rice  |          |                                           |          |     |
| Duodenum | straw | Positive | Edema                                     | 9.18E-07 | 115 |
|          | Rice  |          |                                           |          |     |
| Duodenum | straw | Positive | apoptosis of heart cells                  | 9.18E-07 | 69  |
|          | Rice  |          |                                           |          |     |
| Duodenum | straw | Positive | growth of epithelial tissue               | 9.22E-07 | 211 |
|          | Rice  |          |                                           |          |     |
| Duodenum | straw | Positive | cell death of lymphocytes                 | 9.35E-07 | 127 |
|          | Rice  |          |                                           |          |     |
| Duodenum | straw | Positive | growth of neurites                        | 1.03E-06 | 149 |
|          | Rice  |          |                                           |          |     |
| Duodenum | straw | Positive | apoptosis of T lymphocytes                | 1.03E-06 | 96  |
|          | Rice  |          |                                           |          |     |
| Duodenum | straw | Positive | synthesis of DNA                          | 1.03E-06 | 136 |
|          | Rice  |          |                                           |          |     |
| Duodenum | straw | Positive | cell death of immune cells                | 1.05E-06 | 205 |
|          | Rice  |          |                                           |          |     |
| Duodenum | straw | Positive | quantity of phagocytes                    | 1.06E-06 | 138 |
|          | Rice  |          |                                           |          |     |
| Duodenum | straw | Positive | development of lymphocytes                | 1.07E-06 | 175 |
|          | Rice  |          |                                           |          |     |
| Duodenum | straw | Positive | development of cardiovascular tissue      | 1.15E-06 | 122 |
|          | Rice  |          |                                           |          |     |
| Duodenum | straw | Positive | seizure disorder                          | 1.15E-06 | 151 |
| Duodenum | Rice  | Positive | development of mononuclear leukocytes     | 1.17E-06 | 176 |

|          |       |          |                                                 |          |      |  |
|----------|-------|----------|-------------------------------------------------|----------|------|--|
|          | straw |          |                                                 |          |      |  |
|          | Rice  |          |                                                 |          |      |  |
| Duodenum | straw | Positive | cellular degradation                            | 1.21E-06 | 88   |  |
|          | Rice  |          |                                                 |          |      |  |
| Duodenum | straw | Positive | proliferation of fibroblasts                    | 1.24E-06 | 117  |  |
|          | Rice  |          |                                                 |          |      |  |
| Duodenum | straw | Positive | endometrium tumor                               | 1.26E-06 | 791  |  |
|          | Rice  |          |                                                 |          |      |  |
| Duodenum | straw | Positive | necrosis of liver                               | 1.27E-06 | 83   |  |
|          | Rice  |          |                                                 |          |      |  |
| Duodenum | straw | Positive | apoptosis of central nervous system cells       | 1.27E-06 | 60   |  |
|          | Rice  |          |                                                 |          |      |  |
| Duodenum | straw | Positive | apoptosis of lymphocytes                        | 1.29E-06 | 115  |  |
|          | Rice  |          |                                                 |          |      |  |
| Duodenum | straw | Positive | T cell development                              | 1.34E-06 | 160  |  |
|          | Rice  |          |                                                 |          |      |  |
| Duodenum | straw | Positive | proliferation of hematopoietic cells            | 1.39E-06 | 88   |  |
|          | Rice  |          |                                                 |          |      |  |
| Duodenum | straw | Positive | apoptosis of cardiomyocytes                     | 1.42E-06 | 67   |  |
|          | Rice  |          |                                                 |          |      |  |
| Duodenum | straw | Positive | apoptosis of hepatocytes                        | 1.45E-06 | 51   |  |
|          | Rice  |          |                                                 |          |      |  |
| Duodenum | straw | Positive | biosynthesis of nucleoside triphosphate         | 1.53E-06 | 43   |  |
|          | Rice  |          |                                                 |          |      |  |
| Duodenum | straw | Positive | proliferation of embryonic cells                | 1.62E-06 | 86   |  |
|          | Rice  |          |                                                 |          |      |  |
| Duodenum | straw | Positive | differentiation of epithelial cells             | 1.63E-06 | 105  |  |
|          | Rice  |          |                                                 |          |      |  |
| Duodenum | straw | Positive | cell death of dermal cells                      | 1.66E-06 | 40   |  |
|          | Rice  |          |                                                 |          |      |  |
| Duodenum | straw | Positive | morphology of vessel                            | 1.68E-06 | 103  |  |
|          | Rice  |          |                                                 |          |      |  |
| Duodenum | straw | Positive | outgrowth of plasma membrane projections        | 1.81E-06 | 132  |  |
|          | Rice  |          |                                                 |          |      |  |
| Duodenum | straw | Positive | cell viability of connective tissue cells       | 1.84E-06 | 51   |  |
|          | Rice  |          |                                                 |          |      |  |
| Duodenum | straw | Positive | growth of lymphatic system component            | 1.84E-06 | 69   |  |
|          | Rice  |          |                                                 |          |      |  |
| Duodenum | straw | Positive | proliferation of hematopoietic progenitor cells | 1.86E-06 | 84   |  |
|          | Rice  |          |                                                 |          |      |  |
| Duodenum | straw | Positive | cell death of mononuclear leukocytes            | 1.88E-06 | 129  |  |
|          | Rice  |          |                                                 |          |      |  |
| Duodenum | straw | Positive | learning                                        | 1.88E-06 | 135  |  |
| Duodenum | Rice  | Positive | liver cancer                                    | 1.96E-06 | 1154 |  |

|          |       |          |                                          |          |      |
|----------|-------|----------|------------------------------------------|----------|------|
|          | straw |          |                                          |          |      |
|          | Rice  |          |                                          |          |      |
| Duodenum | straw | Positive | growth of muscle tissue                  | 2.01E-06 | 122  |
|          | Rice  |          |                                          |          |      |
| Duodenum | straw | Positive | morphology of muscle                     | 2.04E-06 | 111  |
|          | Rice  |          |                                          |          |      |
| Duodenum | straw | Positive | abdominal carcinoma                      | 2.04E-06 | 1572 |
|          | Rice  |          |                                          |          |      |
| Duodenum | straw | Positive | abnormal morphology of epithelial tissue | 2.09E-06 | 135  |
|          | Rice  |          |                                          |          |      |
| Duodenum | straw | Positive | endometrial cancer                       | 2.11E-06 | 787  |
|          | Rice  |          |                                          |          |      |
| Duodenum | straw | Positive | tumorigenesis of reproductive tract      | 2.11E-06 | 924  |
|          | Rice  |          |                                          |          |      |
| Duodenum | straw | Positive | autosomal recessive disease              | 2.22E-06 | 275  |
|          | Rice  |          |                                          |          |      |
| Duodenum | straw | Positive | cell viability of tumor cell lines       | 2.30E-06 | 236  |
|          | Rice  |          |                                          |          |      |
| Duodenum | straw | Positive | hepatobiliary system cancer              | 2.31E-06 | 1158 |
|          | Rice  |          |                                          |          |      |
| Duodenum | straw | Positive | proliferation of muscle cells            | 2.44E-06 | 121  |
|          | Rice  |          |                                          |          |      |
| Duodenum | straw | Positive | apoptosis of mononuclear leukocytes      | 2.46E-06 | 117  |
|          | Rice  |          |                                          |          |      |
| Duodenum | straw | Positive | growth of embryonic tissue               | 2.52E-06 | 93   |
|          | Rice  |          |                                          |          |      |
| Duodenum | straw | Positive | inflammation of central nervous system   | 2.53E-06 | 101  |
|          | Rice  |          |                                          |          |      |
| Duodenum | straw | Positive | dysgenesis                               | 2.58E-06 | 169  |
|          | Rice  |          |                                          |          |      |
| Duodenum | straw | Positive | cell death of cervical cancer cell lines | 2.59E-06 | 115  |
|          | Rice  |          |                                          |          |      |
| Duodenum | straw | Positive | generation of T lymphocytes              | 2.70E-06 | 45   |
|          | Rice  |          |                                          |          |      |
| Duodenum | straw | Positive | female genital tract adenocarcinoma      | 2.72E-06 | 786  |
|          | Rice  |          |                                          |          |      |
| Duodenum | straw | Positive | morphology of endothelial cells          | 2.72E-06 | 28   |
|          | Rice  |          |                                          |          |      |
| Duodenum | straw | Positive | differentiation of tumor cell lines      | 2.83E-06 | 123  |
|          | Rice  |          |                                          |          |      |
| Duodenum | straw | Positive | migration of blood cells                 | 3.08E-06 | 261  |
|          | Rice  |          |                                          |          |      |
| Duodenum | straw | Positive | T cell homeostasis                       | 3.09E-06 | 162  |
| Duodenum | Rice  | Positive | metabolism of protein                    | 3.09E-06 | 288  |

|          |       |          |                                         |          |      |  |
|----------|-------|----------|-----------------------------------------|----------|------|--|
|          | straw |          |                                         |          |      |  |
|          | Rice  |          |                                         |          |      |  |
| Duodenum | straw | Positive | proliferation of mononuclear leukocytes | 3.13E-06 | 224  |  |
|          | Rice  |          |                                         |          |      |  |
| Duodenum | straw | Positive | aggregation of blood platelets          | 3.20E-06 | 68   |  |
|          | Rice  |          |                                         |          |      |  |
| Duodenum | straw | Positive | development of endothelial tissue       | 3.22E-06 | 119  |  |
|          | Rice  |          |                                         |          |      |  |
| Duodenum | straw | Positive | outgrowth of neurites                   | 3.22E-06 | 130  |  |
|          | Rice  |          |                                         |          |      |  |
| Duodenum | straw | Positive | degeneration of neurons                 | 3.25E-06 | 82   |  |
|          | Rice  |          |                                         |          |      |  |
| Duodenum | straw | Positive | outgrowth of neurons                    | 3.25E-06 | 131  |  |
|          | Rice  |          |                                         |          |      |  |
| Duodenum | straw | Positive | Lymphocyte homeostasis                  | 3.31E-06 | 170  |  |
|          | Rice  |          |                                         |          |      |  |
| Duodenum | straw | Positive | proliferation of myeloid cells          | 3.46E-06 | 46   |  |
|          | Rice  |          |                                         |          |      |  |
| Duodenum | straw | Positive | female genital tract cancer             | 3.48E-06 | 916  |  |
|          | Rice  |          |                                         |          |      |  |
| Duodenum | straw | Positive | abnormal morphology of skull            | 3.70E-06 | 76   |  |
|          | Rice  |          |                                         |          |      |  |
| Duodenum | straw | Positive | size of embryo                          | 3.73E-06 | 116  |  |
|          | Rice  |          |                                         |          |      |  |
| Duodenum | straw | Positive | leukocyte migration                     | 3.76E-06 | 260  |  |
|          | Rice  |          |                                         |          |      |  |
| Duodenum | straw | Positive | formation of actin stress fibers        | 3.76E-06 | 82   |  |
|          | Rice  |          |                                         |          |      |  |
| Duodenum | straw | Positive | proliferation of epidermal cells        | 3.76E-06 | 61   |  |
|          | Rice  |          |                                         |          |      |  |
| Duodenum | straw | Positive | apoptosis of cerebral cortex cells      | 4.03E-06 | 42   |  |
|          | Rice  |          |                                         |          |      |  |
| Duodenum | straw | Positive | abnormal morphology of skin             | 4.04E-06 | 83   |  |
|          | Rice  |          |                                         |          |      |  |
| Duodenum | straw | Positive | endothelial cell development            | 4.04E-06 | 115  |  |
|          | Rice  |          |                                         |          |      |  |
| Duodenum | straw | Positive | migration of fibroblasts                | 4.08E-06 | 53   |  |
|          | Rice  |          |                                         |          |      |  |
| Duodenum | straw | Positive | autophagy                               | 4.15E-06 | 121  |  |
|          | Rice  |          |                                         |          |      |  |
| Duodenum | straw | Positive | metabolism of nucleoside triphosphate   | 4.15E-06 | 52   |  |
|          | Rice  |          |                                         |          |      |  |
| Duodenum | straw | Positive | formation of cellular protrusions       | 4.18E-06 | 268  |  |
| Duodenum | Rice  | Positive | liver tumor                             | 4.26E-06 | 1157 |  |

|          |       |          |                                             |          |     |
|----------|-------|----------|---------------------------------------------|----------|-----|
|          | straw |          |                                             |          |     |
|          | Rice  |          |                                             |          |     |
| Duodenum | straw | Positive | cell movement of leukocytes                 | 4.27E-06 | 231 |
|          | Rice  |          |                                             |          |     |
| Duodenum | straw | Positive | cell death of pheochromocytoma cell lines   | 4.27E-06 | 46  |
|          | Rice  |          |                                             |          |     |
| Duodenum | straw | Positive | Hypoplasia                                  | 4.27E-06 | 158 |
|          | Rice  |          | metabolism of nucleic acid component or     |          |     |
| Duodenum | straw | Positive | derivative                                  | 4.27E-06 | 162 |
|          | Rice  |          |                                             |          |     |
| Duodenum | straw | Positive | proliferation of lymphocytes                | 4.27E-06 | 220 |
|          | Rice  |          |                                             |          |     |
| Duodenum | straw | Positive | formation of lymphoid organ                 | 4.33E-06 | 89  |
|          | Rice  |          |                                             |          |     |
| Duodenum | straw | Positive | formation of lymphatic system component     | 4.36E-06 | 97  |
|          | Rice  |          |                                             |          |     |
| Duodenum | straw | Positive | ossification of bone                        | 4.46E-06 | 56  |
|          | Rice  |          |                                             |          |     |
| Duodenum | straw | Positive | proliferation of smooth muscle cells        | 4.51E-06 | 95  |
|          | Rice  |          |                                             |          |     |
| Duodenum | straw | Positive | homeostasis of leukocytes                   | 4.51E-06 | 172 |
|          | Rice  |          | abnormal morphology of vascular endothelial |          |     |
| Duodenum | straw | Positive | cells                                       | 4.54E-06 | 21  |
|          | Rice  |          |                                             |          |     |
| Duodenum | straw | Positive | apoptosis of brain                          | 4.57E-06 | 55  |
|          | Rice  |          |                                             |          |     |
| Duodenum | straw | Positive | proliferation of dermal cells               | 4.75E-06 | 63  |
|          | Rice  |          |                                             |          |     |
| Duodenum | straw | Positive | cell death of skin                          | 4.82E-06 | 41  |
|          | Rice  |          |                                             |          |     |
| Duodenum | straw | Positive | fibrogenesis                                | 5.33E-06 | 131 |
|          | Rice  |          |                                             |          |     |
| Duodenum | straw | Positive | generation of cells                         | 5.38E-06 | 88  |
|          | Rice  |          |                                             |          |     |
| Duodenum | straw | Positive | hypersensitive reaction                     | 5.64E-06 | 136 |
|          | Rice  |          |                                             |          |     |
| Duodenum | straw | Positive | size of bone                                | 5.85E-06 | 92  |
|          | Rice  |          |                                             |          |     |
| Duodenum | straw | Positive | demyelination of spinal cord                | 6.10E-06 | 17  |
|          | Rice  |          |                                             |          |     |
| Duodenum | straw | Positive | uptake of carbohydrate                      | 6.19E-06 | 96  |
|          | Rice  |          |                                             |          |     |
| Duodenum | straw | Positive | concentration of lipid                      | 6.22E-06 | 242 |
| Duodenum | Rice  | Positive | dysmyelination                              | 6.52E-06 | 50  |



|          |       |          |                                            |          |     |
|----------|-------|----------|--------------------------------------------|----------|-----|
|          | straw |          |                                            |          |     |
|          | Rice  |          |                                            |          |     |
| Duodenum | straw | Positive | degeneration of central nervous system     | 6.63E-06 | 49  |
|          | Rice  |          |                                            |          |     |
| Duodenum | straw | Positive | vascularization                            | 6.64E-06 | 80  |
|          | Rice  |          |                                            |          |     |
| Duodenum | straw | Positive | cell death of epidermal cells              | 6.82E-06 | 37  |
|          | Rice  |          |                                            |          |     |
| Duodenum | straw | Positive | development of myeloid cells               | 6.82E-06 | 37  |
|          | Rice  |          |                                            |          |     |
| Duodenum | straw | Positive | immune response of cells                   | 6.82E-06 | 176 |
|          | Rice  |          |                                            |          |     |
| Duodenum | straw | Positive | autosomal dominant disease                 | 6.85E-06 | 194 |
|          | Rice  |          |                                            |          |     |
| Duodenum | straw | Positive | seizures                                   | 6.87E-06 | 127 |
|          | Rice  |          |                                            |          |     |
| Duodenum | straw | Positive | cell death of liver cells                  | 7.10E-06 | 68  |
|          | Rice  |          |                                            |          |     |
| Duodenum | straw | Positive | Encephalitis                               | 7.26E-06 | 97  |
|          | Rice  |          |                                            |          |     |
| Duodenum | straw | Positive | differentiation of muscle cell lines       | 7.32E-06 | 58  |
|          | Rice  |          |                                            |          |     |
| Duodenum | straw | Positive | advanced malignant tumor                   | 7.35E-06 | 251 |
|          | Rice  |          |                                            |          |     |
| Duodenum | straw | Positive | apoptosis of liver                         | 7.66E-06 | 57  |
|          | Rice  |          |                                            |          |     |
| Duodenum | straw | Positive | uterine tumor                              | 7.72E-06 | 860 |
|          | Rice  |          |                                            |          |     |
| Duodenum | straw | Positive | maturation of cells                        | 7.83E-06 | 143 |
|          | Rice  |          |                                            |          |     |
| Duodenum | straw | Positive | cell death of central nervous system cells | 7.83E-06 | 96  |
|          | Rice  |          |                                            |          |     |
| Duodenum | straw | Positive | cell death of muscle                       | 7.83E-06 | 111 |
|          | Rice  |          |                                            |          |     |
| Duodenum | straw | Positive | attachment of cells                        | 7.88E-06 | 50  |
|          | Rice  |          |                                            |          |     |
| Duodenum | straw | Positive | autophagy of cells                         | 7.97E-06 | 88  |
|          | Rice  |          |                                            |          |     |
| Duodenum | straw | Positive | abnormal morphology of endothelial tissue  | 8.01E-06 | 28  |
|          | Rice  |          |                                            |          |     |
| Duodenum | straw | Positive | morphogenesis of neurons                   | 8.07E-06 | 134 |
|          | Rice  |          |                                            |          |     |
| Duodenum | straw | Positive | apoptosis of connective tissue cells       | 8.07E-06 | 97  |
| Duodenum | Rice  | Positive | apoptosis of dermal cells                  | 8.25E-06 | 36  |

|          |       |          |                                             |          |      |
|----------|-------|----------|---------------------------------------------|----------|------|
|          | straw |          |                                             |          |      |
|          | Rice  |          |                                             |          |      |
| Duodenum | straw | Positive | metabolism of carbohydrate                  | 8.26E-06 | 189  |
|          | Rice  |          |                                             |          |      |
| Duodenum | straw | Positive | proliferation of bone marrow cells          | 8.26E-06 | 45   |
|          | Rice  |          |                                             |          |      |
| Duodenum | straw | Positive | differentiation of leukocytes               | 8.91E-06 | 203  |
|          | Rice  |          |                                             |          |      |
| Duodenum | straw | Positive | apoptosis of brain cells                    | 9.13E-06 | 52   |
|          | Rice  |          |                                             |          |      |
| Duodenum | straw | Positive | congenital anomaly of cardiovascular system | 9.44E-06 | 77   |
|          | Rice  |          |                                             |          |      |
| Duodenum | straw | Positive | adhesion of immune cells                    | 1.01E-05 | 112  |
|          | Rice  |          |                                             |          |      |
| Duodenum | straw | Positive | outgrowth of cells                          | 1.01E-05 | 136  |
|          | Rice  |          |                                             |          |      |
| Duodenum | straw | Positive | cell death of muscle cells                  | 1.02E-05 | 108  |
|          | Rice  |          |                                             |          |      |
| Duodenum | straw | Positive | epilepsy                                    | 1.02E-05 | 100  |
|          | Rice  |          |                                             |          |      |
| Duodenum | straw | Positive | cell death of keratinocytes                 | 1.02E-05 | 35   |
|          | Rice  |          |                                             |          |      |
| Duodenum | straw | Positive | cell death of smooth muscle cells           | 1.04E-05 | 43   |
|          | Rice  |          |                                             |          |      |
| Duodenum | straw | Positive | demyelination                               | 1.04E-05 | 45   |
|          | Rice  |          |                                             |          |      |
| Duodenum | straw | Positive | necrosis of muscle                          | 1.06E-05 | 110  |
|          | Rice  |          |                                             |          |      |
| Duodenum | straw | Positive | survival of organism                        | 1.07E-05 | 211  |
|          | Rice  |          |                                             |          |      |
| Duodenum | straw | Positive | production of protein                       | 1.08E-05 | 106  |
|          | Rice  |          |                                             |          |      |
| Duodenum | straw | Positive | binding of T lymphocytes                    | 1.12E-05 | 30   |
|          | Rice  |          |                                             |          |      |
| Duodenum | straw | Positive | cytopenia                                   | 1.17E-05 | 97   |
|          | Rice  |          |                                             |          |      |
| Duodenum | straw | Positive | tumorigenesis of genital organ              | 1.18E-05 | 1041 |
|          | Rice  |          |                                             |          |      |
| Duodenum | straw | Positive | metabolism of nucleotide                    | 1.22E-05 | 137  |
|          | Rice  |          |                                             |          |      |
| Duodenum | straw | Positive | cell death of gonadal cell lines            | 1.29E-05 | 31   |
|          | Rice  |          |                                             |          |      |
| Duodenum | straw | Positive | quantity of hematopoietic cells             | 1.37E-05 | 138  |
| Duodenum | Rice  | Positive | hypoplasia of organ                         | 1.37E-05 | 139  |

|          |       |          |                                             |          |     |
|----------|-------|----------|---------------------------------------------|----------|-----|
|          | straw |          |                                             |          |     |
|          | Rice  |          |                                             |          |     |
| Duodenum | straw | Positive | formation of muscle                         | 1.37E-05 | 125 |
|          | Rice  |          |                                             |          |     |
| Duodenum | straw | Positive | morphogenesis of neurites                   | 1.45E-05 | 131 |
|          | Rice  |          |                                             |          |     |
| Duodenum | straw | Positive | homing of cells                             | 1.50E-05 | 170 |
|          | Rice  |          |                                             |          |     |
| Duodenum | straw | Positive | morphology of mouth                         | 1.52E-05 | 49  |
|          | Rice  |          |                                             |          |     |
| Duodenum | straw | Positive | formation of filaments                      | 1.53E-05 | 125 |
|          | Rice  |          |                                             |          |     |
| Duodenum | straw | Positive | morphology of heart ventricle               | 1.54E-05 | 66  |
|          | Rice  |          |                                             |          |     |
| Duodenum | straw | Positive | quantity of glycosphingolipid               | 1.58E-05 | 38  |
|          | Rice  |          |                                             |          |     |
| Duodenum | straw | Positive | morphology of blood vessel                  | 1.62E-05 | 92  |
|          | Rice  |          |                                             |          |     |
| Duodenum | straw | Positive | activation of blood cells                   | 1.62E-05 | 222 |
|          | Rice  |          |                                             |          |     |
| Duodenum | straw | Positive | development of head                         | 1.68E-05 | 285 |
|          | Rice  |          |                                             |          |     |
| Duodenum | straw | Positive | morphology of skeleton                      | 1.77E-05 | 91  |
|          | Rice  |          |                                             |          |     |
| Duodenum | straw | Positive | dyskinesia                                  | 1.77E-05 | 186 |
|          | Rice  |          |                                             |          |     |
| Duodenum | straw | Positive | uptake of monosaccharide                    | 1.77E-05 | 88  |
|          | Rice  |          |                                             |          |     |
| Duodenum | straw | Positive | aggregation of blood cells                  | 1.80E-05 | 78  |
|          | Rice  |          |                                             |          |     |
| Duodenum | straw | Positive | quantity of hematopoietic progenitor cells  | 1.80E-05 | 137 |
|          | Rice  |          |                                             |          |     |
| Duodenum | straw | Positive | polyarticular juvenile rheumatoid arthritis | 1.80E-05 | 35  |
|          | Rice  |          |                                             |          |     |
| Duodenum | straw | Positive | growth of tumor                             | 1.80E-05 | 235 |
|          | Rice  |          |                                             |          |     |
| Duodenum | straw | Positive | coagulation                                 | 1.80E-05 | 66  |
|          | Rice  |          |                                             |          |     |
| Duodenum | straw | Positive | aggregation of cells                        | 1.83E-05 | 104 |
|          | Rice  |          |                                             |          |     |
| Duodenum | straw | Positive | arrest in proliferation of cells            | 1.85E-05 | 72  |
|          | Rice  |          |                                             |          |     |
| Duodenum | straw | Positive | metastasis                                  | 1.87E-05 | 225 |
| Duodenum | Rice  | Positive | function of myeloid cells                   | 1.89E-05 | 79  |

|          |       |          |                                         |          |     |  |
|----------|-------|----------|-----------------------------------------|----------|-----|--|
|          | straw |          |                                         |          |     |  |
|          | Rice  |          |                                         |          |     |  |
| Duodenum | straw | Positive | cell movement of endothelial cells      | 1.93E-05 | 112 |  |
|          | Rice  |          |                                         |          |     |  |
| Duodenum | straw | Positive | cell death of leukemia cell lines       | 1.95E-05 | 102 |  |
|          | Rice  |          |                                         |          |     |  |
| Duodenum | straw | Positive | formation of actin filaments            | 1.95E-05 | 98  |  |
|          | Rice  |          |                                         |          |     |  |
| Duodenum | straw | Positive | growth of skin                          | 1.97E-05 | 73  |  |
|          | Rice  |          |                                         |          |     |  |
| Duodenum | straw | Positive | morphology of digestive system          | 1.99E-05 | 173 |  |
|          | Rice  |          |                                         |          |     |  |
| Duodenum | straw | Positive | apoptosis of neuroblastoma cell lines   | 2.02E-05 | 45  |  |
|          | Rice  |          |                                         |          |     |  |
| Duodenum | straw | Positive | engulfment of cells                     | 2.06E-05 | 127 |  |
|          | Rice  |          |                                         |          |     |  |
| Duodenum | straw | Positive | apoptosis of liver cells                | 2.08E-05 | 55  |  |
|          | Rice  |          |                                         |          |     |  |
| Duodenum | straw | Positive | endometrial carcinoma                   | 2.09E-05 | 727 |  |
|          | Rice  |          |                                         |          |     |  |
| Duodenum | straw | Positive | migration of vascular endothelial cells | 2.11E-05 | 58  |  |
|          | Rice  |          |                                         |          |     |  |
| Duodenum | straw | Positive | cell death of brain                     | 2.18E-05 | 94  |  |
|          | Rice  |          |                                         |          |     |  |
| Duodenum | straw | Positive | apoptosis of epidermal cells            | 2.21E-05 | 34  |  |
|          | Rice  |          |                                         |          |     |  |
| Duodenum | straw | Positive | arthritis                               | 2.33E-05 | 272 |  |
|          | Rice  |          |                                         |          |     |  |
| Duodenum | straw | Positive | interphase of connective tissue cells   | 2.36E-05 | 31  |  |
|          | Rice  |          |                                         |          |     |  |
| Duodenum | straw | Positive | quantity of granulocytes                | 2.38E-05 | 101 |  |
|          | Rice  |          |                                         |          |     |  |
| Duodenum | straw | Positive | differentiation of blood cells          | 2.38E-05 | 247 |  |
|          | Rice  |          |                                         |          |     |  |
| Duodenum | straw | Positive | abnormal morphology of digestive system | 2.52E-05 | 165 |  |
|          | Rice  |          |                                         |          |     |  |
| Duodenum | straw | Positive | epileptic seizure                       | 2.53E-05 | 58  |  |
|          | Rice  |          |                                         |          |     |  |
| Duodenum | straw | Positive | abnormal morphology of skeleton         | 2.54E-05 | 88  |  |
|          | Rice  |          |                                         |          |     |  |
| Duodenum | straw | Positive | endometrioid carcinoma                  | 2.54E-05 | 720 |  |
|          | Rice  |          |                                         |          |     |  |
| Duodenum | straw | Positive | development of phagocytes               | 2.55E-05 | 32  |  |
| Duodenum | Rice  | Positive | adhesion of blood cells                 | 2.55E-05 | 118 |  |

|          |       |          |                                           |          |      |
|----------|-------|----------|-------------------------------------------|----------|------|
|          | straw |          |                                           |          |      |
|          | Rice  |          |                                           |          |      |
| Duodenum | straw | Positive | interphase of fibroblasts                 | 2.56E-05 | 29   |
|          | Rice  |          |                                           |          |      |
| Duodenum | straw | Positive | homing                                    | 2.73E-05 | 173  |
|          | Rice  |          |                                           |          |      |
| Duodenum | straw | Positive | movement of vascular endothelial cells    | 2.73E-05 | 62   |
|          | Rice  |          |                                           |          |      |
| Duodenum | straw | Positive | morphology of lymphatic system component  | 2.77E-05 | 129  |
|          | Rice  |          |                                           |          |      |
| Duodenum | straw | Positive | proliferation of hematopoietic cell lines | 2.80E-05 | 74   |
|          | Rice  |          |                                           |          |      |
| Duodenum | straw | Positive | development of body axis                  | 2.82E-05 | 302  |
|          | Rice  |          |                                           |          |      |
| Duodenum | straw | Positive | migration of endothelial cells            | 2.83E-05 | 104  |
|          | Rice  |          |                                           |          |      |
| Duodenum | straw | Positive | quantity of immunoglobulin                | 2.84E-05 | 95   |
|          | Rice  |          |                                           |          |      |
| Duodenum | straw | Positive | congenital heart disease                  | 2.84E-05 | 70   |
|          | Rice  |          |                                           |          |      |
| Duodenum | straw | Positive | Huntington's Disease                      | 2.94E-05 | 173  |
|          | Rice  |          |                                           |          |      |
| Duodenum | straw | Positive | abnormal morphology of blood vessel       | 3.00E-05 | 86   |
|          | Rice  |          |                                           |          |      |
| Duodenum | straw | Positive | morphology of genital organ               | 3.06E-05 | 131  |
|          | Rice  |          |                                           |          |      |
| Duodenum | straw | Positive | proliferation of T lymphocytes            | 3.14E-05 | 181  |
|          | Rice  |          |                                           |          |      |
| Duodenum | straw | Positive | genital tract cancer                      | 3.25E-05 | 1027 |
|          | Rice  |          |                                           |          |      |
| Duodenum | straw | Positive | proliferation of epithelial cells         | 3.27E-05 | 150  |
|          | Rice  |          |                                           |          |      |
| Duodenum | straw | Positive | metabolism of sphingolipid                | 3.29E-05 | 49   |
|          | Rice  |          |                                           |          |      |
| Duodenum | straw | Positive | quantity of antigen presenting cells      | 3.37E-05 | 89   |
|          | Rice  |          |                                           |          |      |
| Duodenum | straw | Positive | apoptosis of keratinocytes                | 3.39E-05 | 32   |
|          | Rice  |          |                                           |          |      |
| Duodenum | straw | Positive | quantity of carbohydrate                  | 3.39E-05 | 157  |
|          | Rice  |          |                                           |          |      |
| Duodenum | straw | Positive | uptake of D-glucose                       | 3.48E-05 | 73   |
|          | Rice  |          |                                           |          |      |
| Duodenum | straw | Positive | arthropathy                               | 3.48E-05 | 275  |
| Duodenum | Rice  | Positive | synthesis of ceramide                     | 3.50E-05 | 29   |

|          |       |          |                                          |          |     |
|----------|-------|----------|------------------------------------------|----------|-----|
|          | straw |          |                                          |          |     |
|          | Rice  |          |                                          |          |     |
| Duodenum | straw | Positive | cell death of neuroblastoma cell lines   | 3.53E-05 | 65  |
|          | Rice  |          |                                          |          |     |
| Duodenum | straw | Positive | development of hematopoietic system      | 3.53E-05 | 81  |
|          | Rice  |          |                                          |          |     |
| Duodenum | straw | Positive | multiple congenital anomalies            | 3.67E-05 | 130 |
|          | Rice  |          |                                          |          |     |
| Duodenum | straw | Positive | apoptosis of fibroblasts                 | 3.76E-05 | 72  |
|          | Rice  |          |                                          |          |     |
| Duodenum | straw | Positive | abnormal morphology of snout             | 3.76E-05 | 27  |
|          | Rice  |          |                                          |          |     |
| Duodenum | straw | Positive | growth of liver                          | 3.80E-05 | 64  |
|          | Rice  |          |                                          |          |     |
| Duodenum | straw | Positive | development of neurons                   | 3.81E-05 | 229 |
|          | Rice  |          |                                          |          |     |
| Duodenum | straw | Positive | apoptosis of pheochromocytoma cell lines | 3.88E-05 | 35  |
|          | Rice  |          |                                          |          |     |
| Duodenum | straw | Positive | recruitment of myeloid cells             | 3.88E-05 | 75  |
|          | Rice  |          |                                          |          |     |
| Duodenum | straw | Positive | quantity of myeloid cells                | 4.39E-05 | 111 |
|          | Rice  |          |                                          |          |     |
| Duodenum | straw | Positive | recruitment of phagocytes                | 4.43E-05 | 80  |
|          | Rice  |          |                                          |          |     |
| Duodenum | straw | Positive | apoptosis of cervical cancer cell lines  | 4.44E-05 | 90  |
|          | Rice  |          |                                          |          |     |
| Duodenum | straw | Positive | neurological signs                       | 4.46E-05 | 193 |
|          | Rice  |          |                                          |          |     |
| Duodenum | straw | Positive | activation of leukocytes                 | 4.46E-05 | 206 |
|          | Rice  |          |                                          |          |     |
| Duodenum | straw | Positive | cell death of cerebral cortex cells      | 4.48E-05 | 75  |
|          | Rice  |          |                                          |          |     |
| Duodenum | straw | Positive | I-kappaB kinase/NF-kappaB cascade        | 4.60E-05 | 59  |
|          | Rice  |          |                                          |          |     |
| Duodenum | straw | Positive | transformation of fibroblast cell lines  | 5.06E-05 | 83  |
|          | Rice  |          |                                          |          |     |
| Duodenum | straw | Positive | branching of neurons                     | 5.20E-05 | 91  |
|          | Rice  |          |                                          |          |     |
| Duodenum | straw | Positive | transmigration of cells                  | 5.41E-05 | 54  |
|          | Rice  |          |                                          |          |     |
| Duodenum | straw | Positive | infection by Retroviridae                | 5.46E-05 | 211 |
|          | Rice  |          |                                          |          |     |
| Duodenum | straw | Positive | paraproteinemia                          | 5.61E-05 | 105 |
| Duodenum | Rice  | Positive | proliferation of liver cells             | 5.68E-05 | 63  |

|          |       |          |                                              |          |     |
|----------|-------|----------|----------------------------------------------|----------|-----|
|          | straw |          |                                              |          |     |
|          | Rice  |          |                                              |          |     |
| Duodenum | straw | Positive | cell death of hematopoietic cells            | 5.78E-05 | 77  |
|          | Rice  |          |                                              |          |     |
| Duodenum | straw | Positive | chronic inflammatory disorder                | 5.79E-05 | 279 |
|          | Rice  |          |                                              |          |     |
| Duodenum | straw | Positive | cell death of heart cells                    | 5.82E-05 | 72  |
|          | Rice  |          |                                              |          |     |
| Duodenum | straw | Positive | uterine cancer                               | 5.83E-05 | 810 |
|          | Rice  |          |                                              |          |     |
| Duodenum | straw | Positive | cell death of brain cells                    | 5.83E-05 | 87  |
|          | Rice  |          |                                              |          |     |
| Duodenum | straw | Positive | cell spreading                               | 6.03E-05 | 88  |
|          | Rice  |          |                                              |          |     |
| Duodenum | straw | Positive | development of genitourinary system          | 6.05E-05 | 256 |
|          | Rice  |          |                                              |          |     |
| Duodenum | straw | Positive | recruitment of neutrophils                   | 6.07E-05 | 62  |
|          | Rice  |          |                                              |          |     |
| Duodenum | straw | Positive | apoptosis of epithelial cell lines           | 6.11E-05 | 73  |
|          | Rice  |          |                                              |          |     |
| Duodenum | straw | Positive | production of antibody                       | 6.11E-05 | 98  |
|          | Rice  |          |                                              |          |     |
| Duodenum | straw | Positive | function of lymphocytes                      | 6.26E-05 | 106 |
|          | Rice  |          |                                              |          |     |
| Duodenum | straw | Positive | adenocarcinoma in endometrium                | 6.26E-05 | 713 |
|          | Rice  |          |                                              |          |     |
| Duodenum | straw | Positive | adjuvant arthritis                           | 6.39E-05 | 17  |
|          | Rice  |          |                                              |          |     |
| Duodenum | straw | Positive | cell death of heart                          | 6.39E-05 | 74  |
|          | Rice  |          |                                              |          |     |
| Duodenum | straw | Positive | cell death of hematopoietic progenitor cells | 6.39E-05 | 74  |
|          | Rice  |          |                                              |          |     |
| Duodenum | straw | Positive | abnormal morphology of genital organ         | 6.39E-05 | 125 |
|          | Rice  |          |                                              |          |     |
| Duodenum | straw | Positive | quantity of metal                            | 6.39E-05 | 150 |
|          | Rice  |          |                                              |          |     |
| Duodenum | straw | Positive | congenital malformation of skeleton          | 6.39E-05 | 129 |
|          | Rice  |          |                                              |          |     |
| Duodenum | straw | Positive | adhesion of tumor cell lines                 | 6.45E-05 | 91  |
|          | Rice  |          |                                              |          |     |
| Duodenum | straw | Positive | abnormal morphology of body wall             | 6.56E-05 | 38  |
|          | Rice  |          |                                              |          |     |
| Duodenum | straw | Positive | branching of neurites                        | 6.68E-05 | 88  |
| Duodenum | Rice  | Positive | consumption of oxygen                        | 6.68E-05 | 53  |

|          |       |          |                                         |          |     |
|----------|-------|----------|-----------------------------------------|----------|-----|
|          | straw |          |                                         |          |     |
|          | Rice  |          |                                         |          |     |
| Duodenum | straw | Positive | growth of lymphoid organ                | 6.76E-05 | 58  |
|          | Rice  |          |                                         |          |     |
| Duodenum | straw | Positive | export of molecule                      | 6.76E-05 | 93  |
|          | Rice  |          |                                         |          |     |
| Duodenum | straw | Positive | cellular infiltration by leukocytes     | 6.86E-05 | 119 |
|          | Rice  |          |                                         |          |     |
| Duodenum | straw | Positive | fatty acid metabolism                   | 6.86E-05 | 178 |
|          | Rice  |          |                                         |          |     |
| Duodenum | straw | Positive | cellular infiltration                   | 6.91E-05 | 133 |
|          | Rice  |          |                                         |          |     |
| Duodenum | straw | Positive | function of phagocytes                  | 7.22E-05 | 96  |
|          | Rice  |          |                                         |          |     |
| Duodenum | straw | Positive | fragmentation of DNA                    | 7.22E-05 | 57  |
|          | Rice  |          |                                         |          |     |
| Duodenum | straw | Positive | synthesis of nucleotide                 | 7.24E-05 | 112 |
|          | Rice  |          |                                         |          |     |
| Duodenum | straw | Positive | quantity of IgM                         | 7.27E-05 | 48  |
|          | Rice  |          |                                         |          |     |
| Duodenum | straw | Positive | recruitment of antigen presenting cells | 7.33E-05 | 43  |
|          | Rice  |          |                                         |          |     |
| Duodenum | straw | Positive | development of abdomen                  | 7.42E-05 | 172 |
|          | Rice  |          |                                         |          |     |
| Duodenum | straw | Positive | cell death of stem cells                | 7.59E-05 | 32  |
|          | Rice  |          |                                         |          |     |
| Duodenum | straw | Positive | migration of myeloid cells              | 7.70E-05 | 56  |
|          | Rice  |          |                                         |          |     |
| Duodenum | straw | Positive | encephalomyelitis                       | 7.85E-05 | 82  |
|          | Rice  |          |                                         |          |     |
| Duodenum | straw | Positive | gonadal tumor                           | 7.86E-05 | 237 |
|          | Rice  |          |                                         |          |     |
| Duodenum | straw | Positive | activation of lymphocytes               | 8.05E-05 | 139 |
|          | Rice  |          |                                         |          |     |
| Duodenum | straw | Positive | binding of lymphocytes                  | 8.17E-05 | 35  |
|          | Rice  |          |                                         |          |     |
| Duodenum | straw | Positive | plasma cell dyscrasia                   | 8.17E-05 | 104 |
|          | Rice  |          |                                         |          |     |
| Duodenum | straw | Positive | secretion of molecule                   | 8.18E-05 | 164 |
|          | Rice  |          |                                         |          |     |
| Duodenum | straw | Positive | length of cells                         | 8.18E-05 | 37  |
|          | Rice  |          |                                         |          |     |
| Duodenum | straw | Positive | DNA replication                         | 8.19E-05 | 80  |
| Duodenum | Rice  | Positive | cell death of hepatoma cell lines       | 8.42E-05 | 57  |



|          |       |          |                                             |          |     |
|----------|-------|----------|---------------------------------------------|----------|-----|
|          | straw |          |                                             |          |     |
|          | Rice  |          |                                             |          |     |
| Duodenum | straw | Positive | cell death of epithelial cell lines         | 8.57E-05 | 89  |
|          | Rice  |          |                                             |          |     |
| Duodenum | straw | Positive | long-term potentiation                      | 8.60E-05 | 78  |
|          | Rice  |          |                                             |          |     |
| Duodenum | straw | Positive | Inflammatory Bowel Disease                  | 8.83E-05 | 82  |
|          | Rice  |          |                                             |          |     |
| Duodenum | straw | Positive | blood protein disorder                      | 8.93E-05 | 115 |
|          | Rice  |          |                                             |          |     |
| Duodenum | straw | Positive | differentiation of T lymphocytes            | 8.96E-05 | 116 |
|          | Rice  |          |                                             |          |     |
| Duodenum | straw | Positive | proliferation of cervical cancer cell lines | 9.16E-05 | 66  |
|          | Rice  |          |                                             |          |     |
| Duodenum | straw | Positive | binding of leukocytes                       | 9.32E-05 | 60  |
|          | Rice  |          |                                             |          |     |
| Duodenum | straw | Positive | adhesion of mononuclear leukocytes          | 9.36E-05 | 50  |
|          | Rice  |          |                                             |          |     |
| Duodenum | straw | Positive | death of perinatal stage organism           | 9.45E-05 | 31  |
|          | Rice  |          |                                             |          |     |
| Duodenum | straw | Positive | infection by lentivirus                     | 9.52E-05 | 208 |
|          | Rice  |          |                                             |          |     |
| Duodenum | straw | Positive | chemotaxis of cells                         | 9.55E-05 | 157 |
|          | Rice  |          |                                             |          |     |
| Duodenum | straw | Positive | interphase of tumor cell lines              | 9.69E-05 | 113 |
|          | Rice  |          |                                             |          |     |
| Duodenum | straw | Positive | cell movement of carcinoma cell lines       | 9.69E-05 | 67  |
|          | Rice  |          |                                             |          |     |
| Duodenum | straw | Positive | quantity of epithelial tissue               | 9.98E-05 | 59  |
|          | Rice  |          |                                             |          |     |
| Duodenum | straw | Positive | apoptosis of hematopoietic cells            | 9.98E-05 | 70  |
|          | Rice  |          |                                             |          |     |
| Duodenum | straw | Positive | release of metal                            | 9.98E-05 | 70  |
|          | Rice  |          |                                             |          |     |
| Duodenum | straw | Positive | replication of RNA virus                    | 1.01E-04 | 151 |
|          | Rice  |          |                                             |          |     |
| Duodenum | straw | Positive | biosynthesis of purine ribonucleotide       | 1.02E-04 | 37  |
|          | Rice  |          |                                             |          |     |
| Duodenum | straw | Positive | cell death of myeloma cell lines            | 1.02E-04 | 35  |
|          | Rice  |          |                                             |          |     |
| Duodenum | straw | Positive | metabolism of glycosphingolipid             | 1.04E-04 | 44  |
|          | Rice  |          |                                             |          |     |
| Duodenum | straw | Positive | apoptosis of neutrophils                    | 1.04E-04 | 25  |
| Duodenum | Rice  | Positive | hemorrhagic disease                         | 1.04E-04 | 80  |

|          |       |          |                                             |          |      |
|----------|-------|----------|---------------------------------------------|----------|------|
|          | straw |          |                                             |          |      |
|          | Rice  |          |                                             |          |      |
| Duodenum | straw | Positive | proliferation of leukocyte cell lines       | 1.04E-04 | 66   |
|          | Rice  |          |                                             |          |      |
| Duodenum | straw | Positive | neuritogenesis                              | 1.06E-04 | 172  |
|          | Rice  |          |                                             |          |      |
| Duodenum | straw | Positive | apoptosis of myeloid cells                  | 1.07E-04 | 62   |
|          | Rice  |          |                                             |          |      |
| Duodenum | straw | Positive | peripheral vascular disease                 | 1.07E-04 | 116  |
|          | Rice  |          |                                             |          |      |
| Duodenum | straw | Positive | cell movement of lymphocytes                | 1.08E-04 | 120  |
|          | Rice  |          |                                             |          |      |
| Duodenum | straw | Positive | HIV infection                               | 1.09E-04 | 207  |
|          | Rice  |          |                                             |          |      |
| Duodenum | straw | Positive | apoptosis of hematopoietic progenitor cells | 1.10E-04 | 67   |
|          | Rice  |          |                                             |          |      |
| Duodenum | straw | Positive | cell death of embryonic cells               | 1.16E-04 | 41   |
|          | Rice  |          |                                             |          |      |
| Duodenum | straw | Positive | accumulation of lipid                       | 1.16E-04 | 93   |
|          | Rice  |          |                                             |          |      |
| Duodenum | straw | Positive | migration of granulocytes                   | 1.17E-04 | 49   |
|          | Rice  |          |                                             |          |      |
| Duodenum | straw | Positive | urogenital cancer                           | 1.18E-04 | 1164 |
|          | Rice  |          |                                             |          |      |
| Duodenum | straw | Positive | morphology of lymphoid organ                | 1.18E-04 | 119  |
|          | Rice  |          |                                             |          |      |
| Duodenum | straw | Positive | quantity of double-positive thymocyte       | 1.19E-04 | 40   |
|          | Rice  |          |                                             |          |      |
| Duodenum | straw | Positive | function of heart                           | 1.19E-04 | 74   |
|          | Rice  |          |                                             |          |      |
| Duodenum | straw | Positive | targeting of protein                        | 1.19E-04 | 45   |
|          | Rice  |          |                                             |          |      |
| Duodenum | straw | Positive | experimental autoimmune encephalomyelitis   | 1.20E-04 | 81   |
|          | Rice  |          |                                             |          |      |
| Duodenum | straw | Positive | cell death of cardiomyocytes                | 1.23E-04 | 69   |
|          | Rice  |          |                                             |          |      |
| Duodenum | straw | Positive | recruitment of macrophages                  | 1.24E-04 | 38   |
|          | Rice  |          |                                             |          |      |
| Duodenum | straw | Positive | damage of nervous system                    | 1.24E-04 | 72   |
|          | Rice  |          |                                             |          |      |
| Duodenum | straw | Positive | morphology of vessel component              | 1.25E-04 | 24   |
|          | Rice  |          |                                             |          |      |
| Duodenum | straw | Positive | bleeding of brain                           | 1.27E-04 | 27   |
| Duodenum | Rice  | Positive | condensation of chromatin                   | 1.27E-04 | 27   |

|          |       |          |                                          |          |      |
|----------|-------|----------|------------------------------------------|----------|------|
|          | straw |          |                                          |          |      |
|          | Rice  |          |                                          |          |      |
| Duodenum | straw | Positive | morphology of vascular endothelial cells | 1.27E-04 | 22   |
|          | Rice  |          |                                          |          |      |
| Duodenum | straw | Positive | cell death of granulocytes               | 1.27E-04 | 34   |
|          | Rice  |          |                                          |          |      |
| Duodenum | straw | Positive | synthesis of ATP                         | 1.27E-04 | 34   |
|          | Rice  |          |                                          |          |      |
| Duodenum | straw | Positive | female genital tract serous cancer       | 1.27E-04 | 117  |
|          | Rice  |          |                                          |          |      |
| Duodenum | straw | Negative | malignant solid tumor                    | 4.51E-16 | 1605 |
|          | Rice  |          |                                          |          |      |
| Duodenum | straw | Negative | cell movement                            | 1.83E-15 | 409  |
|          | Rice  |          |                                          |          |      |
| Duodenum | straw | Negative | cancer                                   | 2.00E-15 | 1617 |
|          | Rice  |          |                                          |          |      |
| Duodenum | straw | Negative | proliferation of cells                   | 2.00E-15 | 643  |
|          | Rice  |          |                                          |          |      |
| Duodenum | straw | Negative | morphology of cells                      | 2.71E-15 | 378  |
|          | Rice  |          |                                          |          |      |
| Duodenum | straw | Negative | cell death                               | 7.97E-15 | 587  |
|          | Rice  |          |                                          |          |      |
| Duodenum | straw | Negative | organization of cytoskeleton             | 1.62E-14 | 286  |
|          | Rice  |          |                                          |          |      |
| Duodenum | straw | Negative | epithelial cancer                        | 5.77E-14 | 1342 |
|          | Rice  |          |                                          |          |      |
| Duodenum | straw | Negative | migration of cells                       | 8.80E-14 | 364  |
|          | Rice  |          |                                          |          |      |
| Duodenum | straw | Negative | organization of cytoplasm                | 8.80E-14 | 305  |
|          | Rice  |          |                                          |          |      |
| Duodenum | straw | Negative | abdominal neoplasm                       | 1.12E-13 | 1342 |
|          | Rice  |          |                                          |          |      |
| Duodenum | straw | Negative | tumorigenesis of tissue                  | 1.25E-13 | 1370 |
|          | Rice  |          |                                          |          |      |
| Duodenum | straw | Negative | neoplasia of epithelial tissue           | 1.41E-13 | 1350 |
|          | Rice  |          |                                          |          |      |
| Duodenum | straw | Negative | apoptosis                                | 2.28E-12 | 470  |
|          | Rice  |          |                                          |          |      |
| Duodenum | straw | Negative | microtubule dynamics                     | 2.59E-12 | 242  |
|          | Rice  |          |                                          |          |      |
| Duodenum | straw | Negative | organismal death                         | 4.30E-12 | 431  |
|          | Rice  |          |                                          |          |      |
| Duodenum | straw | Negative | abdominal cancer                         | 8.49E-12 | 1317 |
| Duodenum | Rice  | Negative | necrosis                                 | 8.51E-12 | 456  |

|          |       |          |                                        |          |      |
|----------|-------|----------|----------------------------------------|----------|------|
|          | straw |          |                                        |          |      |
|          | Rice  |          |                                        |          |      |
| Duodenum | straw | Negative | morbidity or mortality                 | 2.30E-11 | 432  |
|          | Rice  |          |                                        |          |      |
| Duodenum | straw | Negative | development of neurons                 | 1.23E-10 | 168  |
|          | Rice  |          |                                        |          |      |
| Duodenum | straw | Negative | digestive organ tumor                  | 1.72E-10 | 1159 |
|          | Rice  |          |                                        |          |      |
| Duodenum | straw | Negative | formation of cellular protrusions      | 1.72E-10 | 188  |
|          | Rice  |          |                                        |          |      |
| Duodenum | straw | Negative | digestive system cancer                | 1.85E-10 | 1149 |
|          | Rice  |          |                                        |          |      |
| Duodenum | straw | Negative | perinatal death                        | 3.96E-10 | 133  |
|          | Rice  |          |                                        |          |      |
| Duodenum | straw | Negative | transcription of RNA                   | 9.58E-10 | 337  |
|          | Rice  |          |                                        |          |      |
| Duodenum | straw | Negative | transcription                          | 9.58E-10 | 358  |
|          | Rice  |          |                                        |          |      |
| Duodenum | straw | Negative | differentiation of cells               | 1.31E-09 | 396  |
|          | Rice  |          |                                        |          |      |
| Duodenum | straw | Negative | Movement Disorders                     | 1.61E-09 | 210  |
|          | Rice  |          |                                        |          |      |
| Duodenum | straw | Negative | transcription of DNA                   | 2.47E-09 | 285  |
|          | Rice  |          |                                        |          |      |
| Duodenum | straw | Negative | abnormal morphology of cells           | 4.85E-09 | 241  |
|          | Rice  |          |                                        |          |      |
| Duodenum | straw | Negative | expression of RNA                      | 4.85E-09 | 377  |
|          | Rice  |          |                                        |          |      |
| Duodenum | straw | Negative | size of body                           | 6.57E-09 | 173  |
|          | Rice  |          |                                        |          |      |
| Duodenum | straw | Negative | angiogenesis                           | 7.92E-09 | 182  |
|          | Rice  |          |                                        |          |      |
| Duodenum | straw | Negative | disorder of basal ganglia              | 1.04E-08 | 158  |
|          | Rice  |          |                                        |          |      |
| Duodenum | straw | Negative | cell movement of tumor cell lines      | 1.21E-08 | 172  |
|          | Rice  |          |                                        |          |      |
| Duodenum | straw | Negative | transport of molecule                  | 1.30E-08 | 293  |
|          | Rice  |          |                                        |          |      |
| Duodenum | straw | Negative | development of vasculature             | 1.56E-08 | 96   |
|          | Rice  |          |                                        |          |      |
| Duodenum | straw | Negative | abnormal morphology of thoracic cavity | 1.68E-08 | 126  |
|          | Rice  |          |                                        |          |      |
| Duodenum | straw | Negative | dyskinesia                             | 2.01E-08 | 131  |
| Duodenum | Rice  | Negative | morphology of nervous system           | 2.87E-08 | 159  |

|          |       |          |                                              |          |     |
|----------|-------|----------|----------------------------------------------|----------|-----|
|          | straw |          |                                              |          |     |
|          | Rice  |          |                                              |          |     |
| Duodenum | straw | Negative | cell movement of fibroblasts                 | 4.85E-08 | 50  |
|          | Rice  |          |                                              |          |     |
| Duodenum | straw | Negative | development of epithelial tissue             | 5.19E-08 | 112 |
|          | Rice  |          |                                              |          |     |
| Duodenum | straw | Negative | neuritogenesis                               | 8.07E-08 | 123 |
|          | Rice  |          |                                              |          |     |
| Duodenum | straw | Negative | formation of plasma membrane projections     | 9.87E-08 | 125 |
|          | Rice  |          |                                              |          |     |
| Duodenum | straw | Negative | cell movement of connective tissue cells     | 9.93E-08 | 57  |
|          | Rice  |          |                                              |          |     |
| Duodenum | straw | Negative | neurological signs                           | 1.27E-07 | 134 |
|          | Rice  |          |                                              |          |     |
| Duodenum | straw | Negative | Huntington's Disease                         | 2.14E-07 | 120 |
|          | Rice  |          |                                              |          |     |
| Duodenum | straw | Negative | cell death of tumor cell lines               | 2.26E-07 | 273 |
|          | Rice  |          |                                              |          |     |
| Duodenum | straw | Negative | neonatal death                               | 2.43E-07 | 96  |
|          | Rice  |          |                                              |          |     |
| Duodenum | straw | Negative | cellular homeostasis                         | 4.00E-07 | 271 |
|          | Rice  |          |                                              |          |     |
| Duodenum | straw | Negative | neuronal cell death                          | 4.48E-07 | 137 |
|          | Rice  |          |                                              |          |     |
| Duodenum | straw | Negative | congenital anomaly of musculoskeletal system | 4.88E-07 | 146 |
|          | Rice  |          |                                              |          |     |
| Duodenum | straw | Negative | migration of tumor cell lines                | 5.01E-07 | 141 |
|          | Rice  |          |                                              |          |     |
| Duodenum | straw | Negative | vasculogenesis                               | 5.04E-07 | 146 |
|          | Rice  |          |                                              |          |     |
| Duodenum | straw | Negative | abnormal morphology of nervous system        | 9.12E-07 | 143 |
|          | Rice  |          |                                              |          |     |
| Duodenum | straw | Negative | morphology of respiratory system             | 1.04E-06 | 71  |
|          | Rice  |          |                                              |          |     |
| Duodenum | straw | Negative | abnormal morphology of respiratory system    | 1.21E-06 | 70  |
|          | Rice  |          |                                              |          |     |
| Duodenum | straw | Negative | activation of DNA endogenous promoter        | 1.41E-06 | 220 |
|          | Rice  |          |                                              |          |     |
| Duodenum | straw | Negative | apoptosis of tumor cell lines                | 1.41E-06 | 220 |
|          | Rice  |          |                                              |          |     |
| Duodenum | straw | Negative | neuromuscular disease                        | 1.46E-06 | 168 |
|          | Rice  |          |                                              |          |     |
| Duodenum | straw | Negative | proliferation of neuronal cells              | 1.46E-06 | 117 |
| Duodenum | Rice  | Negative | morphology of cardiovascular system          | 1.84E-06 | 124 |

|          |       |          |                                              |          |     |
|----------|-------|----------|----------------------------------------------|----------|-----|
|          | straw |          |                                              |          |     |
|          | Rice  |          |                                              |          |     |
| Duodenum | straw | Negative | migration of connective tissue cells         | 1.84E-06 | 46  |
|          | Rice  |          |                                              |          |     |
| Duodenum | straw | Negative | proliferation of connective tissue cells     | 2.44E-06 | 119 |
|          | Rice  |          |                                              |          |     |
| Duodenum | straw | Negative | morphology of muscle                         | 2.84E-06 | 74  |
|          | Rice  |          |                                              |          |     |
| Duodenum | straw | Negative | transport of carbohydrate                    | 3.04E-06 | 48  |
|          | Rice  |          |                                              |          |     |
| Duodenum | straw | Negative | small GTPase mediated signal transduction    | 3.30E-06 | 46  |
|          | Rice  |          |                                              |          |     |
| Duodenum | straw | Negative | abnormal morphology of cardiovascular system | 3.60E-06 | 114 |
|          | Rice  |          |                                              |          |     |
| Duodenum | straw | Negative | development of body trunk                    | 3.67E-06 | 203 |
|          | Rice  |          |                                              |          |     |
| Duodenum | straw | Negative | chemotaxis of cells                          | 3.87E-06 | 107 |
|          | Rice  |          |                                              |          |     |
| Duodenum | straw | Negative | transport of monosaccharide                  | 3.90E-06 | 41  |
|          | Rice  |          |                                              |          |     |
| Duodenum | straw | Negative | transport of D-glucose                       | 4.18E-06 | 38  |
|          | Rice  |          |                                              |          |     |
| Duodenum | straw | Negative | cognition                                    | 4.99E-06 | 94  |
|          | Rice  |          |                                              |          |     |
| Duodenum | straw | Negative | formation of muscle                          | 5.04E-06 | 84  |
|          | Rice  |          |                                              |          |     |
| Duodenum | straw | Negative | protein kinase cascade                       | 6.02E-06 | 88  |
|          | Rice  |          |                                              |          |     |
| Duodenum | straw | Negative | differentiation of connective tissue         | 6.07E-06 | 140 |
|          | Rice  |          |                                              |          |     |
| Duodenum | straw | Negative | binding of DNA                               | 6.35E-06 | 105 |
|          | Rice  |          |                                              |          |     |
| Duodenum | straw | Negative | cell survival                                | 6.35E-06 | 244 |
|          | Rice  |          |                                              |          |     |
| Duodenum | straw | Negative | chemotaxis                                   | 6.53E-06 | 109 |
|          | Rice  |          |                                              |          |     |
| Duodenum | straw | Negative | development of connective tissue             | 6.53E-06 | 79  |
|          | Rice  |          |                                              |          |     |
| Duodenum | straw | Negative | homing of cells                              | 7.07E-06 | 111 |
|          | Rice  |          |                                              |          |     |
| Duodenum | straw | Negative | cell movement of carcinoma cell lines        | 8.02E-06 | 49  |
|          | Rice  |          |                                              |          |     |
| Duodenum | straw | Negative | branching of cells                           | 1.10E-05 | 78  |
| Duodenum | Rice  | Negative | development of cytoplasm                     | 1.10E-05 | 94  |

|          |       |          |                                            |          |     |
|----------|-------|----------|--------------------------------------------|----------|-----|
|          | straw |          |                                            |          |     |
|          | Rice  |          |                                            |          |     |
| Duodenum | straw | Negative | cell viability                             | 1.31E-05 | 228 |
|          | Rice  |          |                                            |          |     |
| Duodenum | straw | Negative | differentiation of connective tissue cells | 1.39E-05 | 124 |
|          | Rice  |          |                                            |          |     |
| Duodenum | straw | Negative | learning                                   | 1.39E-05 | 86  |
|          | Rice  |          |                                            |          |     |
| Duodenum | straw | Negative | formation of skin                          | 1.52E-05 | 77  |
|          | Rice  |          |                                            |          |     |
| Duodenum | straw | Negative | growth of connective tissue                | 1.55E-05 | 124 |
|          | Rice  |          |                                            |          |     |
| Duodenum | straw | Negative | transactivation                            | 1.55E-05 | 113 |
|          | Rice  |          |                                            |          |     |
| Duodenum | straw | Negative | homing                                     | 1.83E-05 | 112 |
|          | Rice  |          |                                            |          |     |
| Duodenum | straw | Negative | colony formation of cells                  | 2.07E-05 | 98  |
|          | Rice  |          |                                            |          |     |
| Duodenum | straw | Negative | multiple congenital anomalies              | 2.19E-05 | 86  |
|          | Rice  |          |                                            |          |     |
| Duodenum | straw | Negative | formation of cytoskeleton                  | 2.27E-05 | 78  |
|          | Rice  |          |                                            |          |     |
| Duodenum | straw | Negative | phosphorylation of protein                 | 2.42E-05 | 138 |
|          | Rice  |          |                                            |          |     |
| Duodenum | straw | Negative | differentiation of epithelial tissue       | 2.42E-05 | 75  |
|          | Rice  |          |                                            |          |     |
| Duodenum | straw | Negative | migration of fibroblasts                   | 2.67E-05 | 36  |
|          | Rice  |          |                                            |          |     |
| Duodenum | straw | Negative | development of head                        | 2.69E-05 | 177 |
|          | Rice  |          |                                            |          |     |
| Duodenum | straw | Negative | development of body axis                   | 2.72E-05 | 188 |
|          | Rice  |          |                                            |          |     |
| Duodenum | straw | Negative | morphogenesis of neurons                   | 2.86E-05 | 86  |
|          | Rice  |          |                                            |          |     |
| Duodenum | straw | Negative | cell transformation                        | 2.98E-05 | 92  |
|          | Rice  |          |                                            |          |     |
| Duodenum | straw | Negative | invasion of cells                          | 3.00E-05 | 159 |
|          | Rice  |          |                                            |          |     |
| Duodenum | straw | Negative | morphology of head                         | 3.00E-05 | 160 |
|          | Rice  |          |                                            |          |     |
| Duodenum | straw | Negative | migration of carcinoma cell lines          | 3.05E-05 | 41  |
|          | Rice  |          |                                            |          |     |
| Duodenum | straw | Negative | morphology of bone                         | 3.24E-05 | 90  |
| Duodenum | Rice  | Negative | apoptosis of fibroblast cell lines         | 3.33E-05 | 69  |

|          |       |          |                                                 |          |     |
|----------|-------|----------|-------------------------------------------------|----------|-----|
|          | straw |          |                                                 |          |     |
|          | Rice  |          |                                                 |          |     |
| Duodenum | straw | Negative | morphology of heart                             | 4.28E-05 | 82  |
|          | Rice  |          |                                                 |          |     |
| Duodenum | straw | Negative | behavior                                        | 4.28E-05 | 177 |
|          | Rice  |          |                                                 |          |     |
| Duodenum | straw | Negative | proliferation of muscle cells                   | 4.43E-05 | 76  |
|          | Rice  |          |                                                 |          |     |
| Duodenum | straw | Negative | morphology of central nervous system            | 4.70E-05 | 100 |
|          | Rice  |          |                                                 |          |     |
| Duodenum | straw | Negative | abnormal morphology of head                     | 4.80E-05 | 152 |
|          | Rice  |          |                                                 |          |     |
| Duodenum | straw | Negative | transactivation of RNA                          | 4.82E-05 | 105 |
|          | Rice  |          |                                                 |          |     |
| Duodenum | straw | Negative | abnormal morphology of body cavity              | 5.17E-05 | 200 |
|          | Rice  |          |                                                 |          |     |
| Duodenum | straw | Negative | formation of actin filaments                    | 6.27E-05 | 64  |
|          | Rice  |          |                                                 |          |     |
| Duodenum | straw | Negative | sprouting                                       | 6.41E-05 | 78  |
|          | Rice  |          |                                                 |          |     |
| Duodenum | straw | Negative | midline defect                                  | 6.89E-05 | 57  |
|          | Rice  |          |                                                 |          |     |
| Duodenum | straw | Negative | binding of protein binding site                 | 6.99E-05 | 61  |
|          | Rice  |          |                                                 |          |     |
| Duodenum | straw | Negative | breast or colorectal cancer                     | 6.99E-05 | 758 |
|          | Rice  |          |                                                 |          |     |
| Duodenum | straw | Negative | cell death of connective tissue cells           | 7.11E-05 | 114 |
|          | Rice  |          |                                                 |          |     |
| Duodenum | straw | Negative | colony formation                                | 7.37E-05 | 103 |
|          | Rice  |          |                                                 |          |     |
| Duodenum | straw | Negative | morphology of fibroblast cell lines             | 7.48E-05 | 24  |
|          | Rice  |          |                                                 |          |     |
| Duodenum | straw | Negative | synthesis of lipid                              | 7.48E-05 | 132 |
|          | Rice  |          |                                                 |          |     |
| Duodenum | straw | Negative | proliferation of hepatoma cell lines            | 7.60E-05 | 45  |
|          | Rice  |          |                                                 |          |     |
| Duodenum | straw | Negative | formation of lung                               | 7.63E-05 | 63  |
|          | Rice  |          |                                                 |          |     |
| Duodenum | straw | Negative | proliferation of tumor cell lines               | 7.69E-05 | 260 |
|          | Rice  |          | epithelial-mesenchymal transition of tumor cell |          |     |
| Duodenum | straw | Negative | lines                                           | 7.79E-05 | 29  |
|          | Rice  |          |                                                 |          |     |
| Duodenum | straw | Negative | respiratory system development                  | 7.87E-05 | 70  |
| Duodenum | Rice  | Negative | abnormal morphology of vasculature              | 7.87E-05 | 38  |



|          |       |          |                                           |          |     |
|----------|-------|----------|-------------------------------------------|----------|-----|
|          | straw |          |                                           |          |     |
|          | Rice  |          |                                           |          |     |
| Duodenum | straw | Negative | morphology of vasculature                 | 7.87E-05 | 39  |
|          | Rice  |          |                                           |          |     |
| Duodenum | straw | Negative | abnormal morphology of epithelial tissue  | 7.87E-05 | 83  |
|          | Rice  |          |                                           |          |     |
| Duodenum | straw | Negative | morphogenesis of neurites                 | 7.87E-05 | 83  |
|          | Rice  |          |                                           |          |     |
| Duodenum | straw | Negative | differentiation of epithelial cells       | 8.13E-05 | 65  |
|          | Rice  |          |                                           |          |     |
| Duodenum | straw | Negative | cartilage development                     | 8.24E-05 | 35  |
|          | Rice  |          |                                           |          |     |
| Duodenum | straw | Negative | formation of actin stress fibers          | 9.20E-05 | 52  |
|          | Rice  |          |                                           |          |     |
| Duodenum | straw | Negative | growth of neurites                        | 9.44E-05 | 90  |
|          | Rice  |          |                                           |          |     |
| Duodenum | straw | Negative | morphology of body cavity                 | 1.01E-04 | 206 |
|          | Rice  |          |                                           |          |     |
| Duodenum | straw | Negative | growth of embryonic tissue                | 1.02E-04 | 58  |
|          | Rice  |          |                                           |          |     |
| Duodenum | straw | Negative | transformation of fibroblast cell lines   | 1.02E-04 | 55  |
|          | Rice  |          |                                           |          |     |
| Duodenum | straw | Negative | abnormal morphology of muscle             | 1.13E-04 | 65  |
|          | Rice  |          |                                           |          |     |
| Duodenum | straw | Negative | function of cardiovascular system         | 1.19E-04 | 74  |
|          | Rice  |          |                                           |          |     |
| Duodenum | straw | Negative | abnormal morphology of pulmonary alveolus | 1.23E-04 | 29  |
|          | Rice  |          |                                           |          |     |
| Duodenum | straw | Negative | Growth Failure                            | 1.24E-04 | 112 |
|          | Rice  |          |                                           |          |     |
| Duodenum | straw | Negative | growth of epithelial tissue               | 1.37E-04 | 125 |
|          | Rice  |          |                                           |          |     |
| Duodenum | straw | Negative | abnormal morphology of heart              | 1.44E-04 | 76  |
|          | Rice  |          |                                           |          |     |
| Duodenum | straw | Negative | abdominal adenocarcinoma                  | 1.55E-04 | 886 |
|          | Rice  |          |                                           |          |     |
| Duodenum | straw | Negative | morphology of lung                        | 1.74E-04 | 42  |
|          | Rice  |          |                                           |          |     |
| Duodenum | straw | Negative | abnormal morphology of lung               | 1.78E-04 | 41  |
|          | Rice  |          |                                           |          |     |
| Duodenum | straw | Negative | proliferation of dermal cells             | 1.81E-04 | 40  |
|          | Rice  |          |                                           |          |     |
| Duodenum | straw | Negative | formation of filaments                    | 1.85E-04 | 78  |
| Duodenum | Rice  | Negative | outgrowth of neurites                     | 1.95E-04 | 79  |

|          |       |          |                                             |          |     |
|----------|-------|----------|---------------------------------------------|----------|-----|
|          | straw |          |                                             |          |     |
|          | Rice  |          |                                             |          |     |
| Duodenum | straw | Negative | cell movement of phagocytes                 | 1.96E-04 | 103 |
|          | Rice  |          |                                             |          |     |
| Duodenum | straw | Negative | morphology of neuroglia                     | 1.96E-04 | 29  |
|          | Rice  |          |                                             |          |     |
| Duodenum | straw | Negative | colony formation of tumor cell lines        | 2.01E-04 | 57  |
|          | Rice  |          |                                             |          |     |
| Duodenum | straw | Negative | oxidation of fatty acid                     | 2.04E-04 | 39  |
|          | Rice  |          |                                             |          |     |
| Duodenum | straw | Negative | cell movement of fibroblast cell lines      | 2.05E-04 | 38  |
|          | Rice  |          |                                             |          |     |
| Duodenum | straw | Negative | apoptosis of neuroblastoma cell lines       | 2.05E-04 | 30  |
|          | Rice  |          |                                             |          |     |
| Duodenum | straw | Negative | fibrogenesis                                | 2.12E-04 | 80  |
|          | Rice  |          |                                             |          |     |
| Duodenum | straw | Negative | abnormal morphology of bone                 | 2.36E-04 | 84  |
|          | Rice  |          |                                             |          |     |
| Duodenum | straw | Negative | cell spreading                              | 2.36E-04 | 57  |
|          | Rice  |          |                                             |          |     |
| Duodenum | straw | Negative | proliferation of cervical cancer cell lines | 2.41E-04 | 44  |
|          | Rice  |          |                                             |          |     |
| Duodenum | straw | Negative | cell movement of breast cancer cell lines   | 2.60E-04 | 59  |
|          | Rice  |          |                                             |          |     |
| Duodenum | straw | Negative | quantity of connective tissue cells         | 2.60E-04 | 50  |
|          | Rice  |          |                                             |          |     |
| Duodenum | straw | Negative | formation of embryonic tissue               | 2.60E-04 | 60  |
|          | Rice  |          |                                             |          |     |
| Duodenum | straw | Negative | metabolism of carbohydrate                  | 2.60E-04 | 114 |
|          | Rice  |          |                                             |          |     |
| Duodenum | straw | Negative | organization of actin cytoskeleton          | 2.60E-04 | 61  |
|          | Rice  |          |                                             |          |     |
| Duodenum | straw | Negative | gastrointestinal tract cancer               | 2.61E-04 | 764 |
|          | Rice  |          |                                             |          |     |
| Duodenum | straw | Negative | transport of protein                        | 2.82E-04 | 61  |
|          | Rice  |          |                                             |          |     |
| Duodenum | straw | Negative | axonogenesis                                | 2.89E-04 | 48  |
|          | Rice  |          |                                             |          |     |
| Duodenum | straw | Negative | Gastrointestinal Tract Cancer and Tumors    | 2.94E-04 | 775 |
|          | Rice  |          |                                             |          |     |
| Duodenum | straw | Negative | morphology of right ventricle               | 3.00E-04 | 17  |
|          | Rice  |          |                                             |          |     |
| Duodenum | straw | Negative | differentiation of muscle                   | 3.00E-04 | 61  |
| Duodenum | Rice  | Negative | outgrowth of cells                          | 3.00E-04 | 83  |

|          |       |          |                                            |          |     |  |
|----------|-------|----------|--------------------------------------------|----------|-----|--|
|          | straw |          |                                            |          |     |  |
|          | Rice  |          |                                            |          |     |  |
| Duodenum | straw | Negative | degeneration of cells                      | 3.11E-04 | 68  |  |
|          | Rice  |          |                                            |          |     |  |
| Duodenum | straw | Negative | retraction of cellular protrusions         | 3.16E-04 | 22  |  |
|          | Rice  |          |                                            |          |     |  |
| Duodenum | straw | Negative | concentration of fatty acid                | 3.16E-04 | 57  |  |
|          | Rice  |          |                                            |          |     |  |
| Duodenum | straw | Negative | adenocarcinoma                             | 3.20E-04 | 965 |  |
|          | Rice  |          |                                            |          |     |  |
| Duodenum | straw | Negative | development of lymphatic system            | 3.20E-04 | 70  |  |
|          | Rice  |          |                                            |          |     |  |
| Duodenum | straw | Negative | development of embryonic cells             | 3.33E-04 | 18  |  |
|          | Rice  |          |                                            |          |     |  |
| Duodenum | straw | Negative | abnormal morphology of interalveolar septa | 3.38E-04 | 14  |  |
|          | Rice  |          |                                            |          |     |  |
| Duodenum | straw | Negative | cell death of neuroblastoma cell lines     | 3.38E-04 | 42  |  |
|          | Rice  |          |                                            |          |     |  |
| Duodenum | straw | Negative | morphology of brain                        | 3.43E-04 | 88  |  |
|          | Rice  |          |                                            |          |     |  |
| Duodenum | straw | Negative | development of cardiovascular tissue       | 3.53E-04 | 72  |  |
|          | Rice  |          |                                            |          |     |  |
| Duodenum | straw | Negative | cell death of epithelial cells             | 3.66E-04 | 93  |  |
|          | Rice  |          |                                            |          |     |  |
| Duodenum | straw | Negative | Bleeding                                   | 3.71E-04 | 81  |  |
|          | Rice  |          |                                            |          |     |  |
| Duodenum | straw | Negative | cell movement of myeloid cells             | 3.71E-04 | 100 |  |
|          | Rice  |          |                                            |          |     |  |
| Duodenum | straw | Negative | proliferation of cancer cells              | 3.82E-04 | 71  |  |
|          | Rice  |          |                                            |          |     |  |
| Duodenum | straw | Negative | growth of lesion                           | 3.90E-04 | 141 |  |
|          | Rice  |          |                                            |          |     |  |
| Duodenum | straw | Negative | gastrointestinal carcinoma                 | 4.03E-04 | 687 |  |
|          | Rice  |          |                                            |          |     |  |
| Duodenum | straw | Negative | growth of skin                             | 4.08E-04 | 46  |  |
|          | Rice  |          |                                            |          |     |  |
| Duodenum | straw | Negative | development of digestive system            | 4.08E-04 | 74  |  |
|          | Rice  |          |                                            |          |     |  |
| Duodenum | straw | Negative | endothelial cell development               | 4.19E-04 | 69  |  |
|          | Rice  |          |                                            |          |     |  |
| Duodenum | straw | Negative | morphology of blood vessel                 | 4.21E-04 | 57  |  |
|          | Rice  |          |                                            |          |     |  |
| Duodenum | straw | Negative | Organ Degeneration                         | 4.42E-04 | 92  |  |
| Duodenum | Rice  | Negative | morphology of vessel                       | 4.56E-04 | 61  |  |

|          |       |          |                                         |          |     |
|----------|-------|----------|-----------------------------------------|----------|-----|
|          | straw |          |                                         |          |     |
|          | Rice  |          |                                         |          |     |
| Duodenum | straw | Negative | exocytosis                              | 4.71E-04 | 41  |
|          | Rice  |          |                                         |          |     |
| Duodenum | straw | Negative | congenital anomaly of digestive system  | 4.73E-04 | 48  |
|          | Rice  |          |                                         |          |     |
| Duodenum | straw | Negative | hyperplasia of skin                     | 5.17E-04 | 31  |
|          | Rice  |          |                                         |          |     |
| Duodenum | straw | Negative | growth of embryo                        | 5.20E-04 | 89  |
|          | Rice  |          |                                         |          |     |
| Duodenum | straw | Negative | growth of tumor                         | 5.24E-04 | 140 |
|          | Rice  |          |                                         |          |     |
| Duodenum | straw | Negative | Rho protein signal transduction         | 5.25E-04 | 22  |
|          | Rice  |          |                                         |          |     |
| Duodenum | straw | Negative | cell viability of cerebral cortex cells | 5.29E-04 | 19  |
|          | Rice  |          |                                         |          |     |
| Duodenum | straw | Negative | differentiation of bone                 | 5.37E-04 | 78  |
|          | Rice  |          |                                         |          |     |
| Duodenum | straw | Negative | congenital malformation of skeleton     | 5.38E-04 | 80  |
|          | Rice  |          |                                         |          |     |
| Duodenum | straw | Negative | secretory pathway                       | 5.40E-04 | 42  |
|          | Rice  |          |                                         |          |     |
| Duodenum | straw | Negative | mitosis                                 | 5.40E-04 | 92  |
|          | Rice  |          |                                         |          |     |
| Duodenum | straw | Negative | proliferation of smooth muscle cells    | 5.67E-04 | 57  |
|          | Rice  |          |                                         |          |     |
| Duodenum | straw | Negative | proliferation of fibroblast cell lines  | 5.67E-04 | 80  |
|          | Rice  |          |                                         |          |     |
| Duodenum | straw | Negative | colon cancer                            | 5.73E-04 | 567 |
|          | Rice  |          |                                         |          |     |
| Duodenum | straw | Negative | proliferation of epidermal cells        | 5.87E-04 | 37  |
|          | Rice  |          |                                         |          |     |
| Duodenum | straw | Negative | invasion of carcinoma cell lines        | 5.87E-04 | 42  |
|          | Rice  |          |                                         |          |     |
| Duodenum | straw | Negative | morphology of connective tissue         | 5.87E-04 | 86  |
|          | Rice  |          |                                         |          |     |
| Duodenum | straw | Negative | colon tumor                             | 5.87E-04 | 570 |
|          | Rice  |          |                                         |          |     |
| Duodenum | straw | Negative | abnormal morphology of neuroglia        | 6.05E-04 | 22  |
|          | Rice  |          |                                         |          |     |
| Duodenum | straw | Negative | cellularity                             | 6.05E-04 | 18  |
|          | Rice  |          |                                         |          |     |
| Duodenum | straw | Negative | proliferation of embryonic cell lines   | 6.11E-04 | 35  |
| Duodenum | Rice  | Negative | cell cycle progression                  | 6.22E-04 | 178 |

|          |       |          |                                           |          |     |  |
|----------|-------|----------|-------------------------------------------|----------|-----|--|
|          | straw |          |                                           |          |     |  |
|          | Rice  |          |                                           |          |     |  |
| Duodenum | straw | Negative | abnormal morphology of embryonic tissue   | 6.25E-04 | 100 |  |
|          | Rice  |          |                                           |          |     |  |
| Duodenum | straw | Negative | tubulation of cells                       | 6.25E-04 | 33  |  |
|          | Rice  |          |                                           |          |     |  |
| Duodenum | straw | Negative | scattering                                | 6.28E-04 | 24  |  |
|          | Rice  |          |                                           |          |     |  |
| Duodenum | straw | Negative | differentiation of bone cells             | 6.34E-04 | 77  |  |
|          | Rice  |          |                                           |          |     |  |
| Duodenum | straw | Negative | proliferation of epithelial cells         | 6.35E-04 | 91  |  |
|          | Rice  |          |                                           |          |     |  |
| Duodenum | straw | Negative | proliferation of fibroblasts              | 6.44E-04 | 68  |  |
|          | Rice  |          |                                           |          |     |  |
| Duodenum | straw | Negative | abdominal carcinoma                       | 6.58E-04 | 890 |  |
|          | Rice  |          |                                           |          |     |  |
| Duodenum | straw | Negative | colorectal neoplasia                      | 6.61E-04 | 658 |  |
|          | Rice  |          |                                           |          |     |  |
| Duodenum | straw | Negative | quantity of carbohydrate                  | 6.73E-04 | 95  |  |
|          | Rice  |          |                                           |          |     |  |
| Duodenum | straw | Negative | proliferation of keratinocytes            | 6.80E-04 | 34  |  |
|          | Rice  |          |                                           |          |     |  |
| Duodenum | straw | Negative | abnormal morphology of right ventricle    | 6.89E-04 | 15  |  |
|          | Rice  |          |                                           |          |     |  |
| Duodenum | straw | Negative | development of endothelial tissue         | 6.98E-04 | 70  |  |
|          | Rice  |          |                                           |          |     |  |
| Duodenum | straw | Negative | proliferation of tumor cells              | 7.25E-04 | 87  |  |
|          | Rice  |          |                                           |          |     |  |
| Duodenum | straw | Negative | cell death of fibroblast cell lines       | 7.25E-04 | 80  |  |
|          | Rice  |          |                                           |          |     |  |
| Duodenum | straw | Negative | cell death of epithelial cell lines       | 7.27E-04 | 56  |  |
|          | Rice  |          |                                           |          |     |  |
| Duodenum | straw | Negative | differentiation of neural precursor cells | 7.29E-04 | 12  |  |
|          | Rice  |          |                                           |          |     |  |
| Duodenum | straw | Negative | cell movement of lung cancer cell lines   | 7.33E-04 | 27  |  |
|          | Rice  |          |                                           |          |     |  |
| Duodenum | straw | Negative | fatty acid metabolism                     | 7.45E-04 | 108 |  |
|          | Rice  |          |                                           |          |     |  |
| Duodenum | straw | Negative | differentiation of tumor cell lines       | 7.45E-04 | 72  |  |
|          | Rice  |          |                                           |          |     |  |
| Duodenum | straw | Negative | abnormal morphology of body wall          | 7.63E-04 | 25  |  |
|          | Rice  |          |                                           |          |     |  |
| Duodenum | straw | Negative | necrosis of epithelial tissue             | 7.67E-04 | 106 |  |
| Duodenum | Rice  | Negative | cell movement of blood cells              | 7.67E-04 | 151 |  |

|          |       |          |                                         |          |     |
|----------|-------|----------|-----------------------------------------|----------|-----|
|          | straw |          |                                         |          |     |
|          | Rice  |          |                                         |          |     |
| Duodenum | straw | Negative | abnormal morphology of blood vessel     | 7.67E-04 | 53  |
|          | Rice  |          | abnormal morphology of central nervous  |          |     |
| Duodenum | straw | Negative | system                                  | 7.73E-04 | 89  |
|          | Rice  |          |                                         |          |     |
| Duodenum | straw | Negative | morphology of cardiovascular tissue     | 7.99E-04 | 22  |
|          | Rice  |          |                                         |          |     |
| Duodenum | straw | Negative | mass of connective tissue               | 8.02E-04 | 42  |
|          | Rice  |          |                                         |          |     |
| Duodenum | straw | Negative | craniofacial abnormality                | 8.04E-04 | 68  |
|          | Rice  |          |                                         |          |     |
| Duodenum | straw | Negative | differentiation of embryonic tissue     | 8.15E-04 | 51  |
|          | Rice  |          |                                         |          |     |
| Duodenum | straw | Negative | formation of focal adhesions            | 8.18E-04 | 34  |
|          | Rice  |          |                                         |          |     |
| Duodenum | straw | Negative | apoptosis of neurons                    | 8.60E-04 | 81  |
|          | Rice  |          |                                         |          |     |
| Duodenum | straw | Negative | proliferation of embryonic cells        | 8.77E-04 | 50  |
|          | Rice  |          |                                         |          |     |
| Duodenum | straw | Negative | maturation of chondrocytes              | 9.06E-04 | 11  |
|          | Rice  |          |                                         |          |     |
| Duodenum | straw | Negative | metabolism of membrane lipid derivative | 9.16E-04 | 73  |
|          | Rice  |          |                                         |          |     |
| Duodenum | straw | Negative | cell viability of cortical neurons      | 9.35E-04 | 14  |
|          | Rice  |          |                                         |          |     |
| Duodenum | straw | Negative | quantity of cells                       | 9.44E-04 | 283 |
|          | Rice  |          |                                         |          |     |
| Duodenum | straw | Negative | development of abdomen                  | 9.51E-04 | 104 |
|          | Rice  |          |                                         |          |     |
| Duodenum | straw | Negative | migration of blood cells                | 9.63E-04 | 150 |
|          | Rice  |          |                                         |          |     |
| Duodenum | straw | Negative | formation of muscle cells               | 9.70E-04 | 38  |
|          | Rice  |          |                                         |          |     |
| Duodenum | straw | Negative | morphology of endothelial tissue        | 9.76E-04 | 21  |
|          | Rice  |          |                                         |          |     |
| Duodenum | straw | Negative | quantity of bone cells                  | 9.80E-04 | 35  |
|          | Rice  |          |                                         |          |     |
| Duodenum | straw | Negative | morphology of endothelial cells         | 1.01E-03 | 17  |
|          | Rice  |          |                                         |          |     |
| Duodenum | straw | Negative | I-kappaB kinase/NF-kappaB cascade       | 1.01E-03 | 37  |
|          | Rice  |          |                                         |          |     |
| Duodenum | straw | Negative | colorectal cancer                       | 1.05E-03 | 647 |
| Duodenum | Rice  | Negative | migration of fibroblast cell lines      | 1.09E-03 | 30  |

|          |       |          |                                       |          |     |
|----------|-------|----------|---------------------------------------|----------|-----|
|          | straw |          |                                       |          |     |
|          | Rice  |          |                                       |          |     |
| Duodenum | straw | Negative | cell viability of tumor cell lines    | 1.10E-03 | 135 |
|          | Rice  |          |                                       |          |     |
| Duodenum | straw | Negative | scattering of cells                   | 1.22E-03 | 20  |
|          | Rice  |          |                                       |          |     |
| Duodenum | straw | Negative | invasion of tumor cell lines          | 1.22E-03 | 117 |
|          | Rice  |          |                                       |          |     |
| Duodenum | straw | Negative | hypoglycemia                          | 1.22E-03 | 27  |
|          | Rice  |          |                                       |          |     |
| Duodenum | straw | Negative | tubulation of endothelial cells       | 1.22E-03 | 27  |
|          | Rice  |          |                                       |          |     |
| Duodenum | straw | Negative | growth of malignant tumor             | 1.24E-03 | 80  |
|          | Rice  |          |                                       |          |     |
| Duodenum | straw | Negative | leukocyte migration                   | 1.27E-03 | 149 |
|          | Rice  |          |                                       |          |     |
| Duodenum | straw | Negative | quantity of connective tissue         | 1.27E-03 | 107 |
|          | Rice  |          |                                       |          |     |
| Duodenum | straw | Negative | congenital malformation of face       | 1.29E-03 | 33  |
|          | Rice  |          |                                       |          |     |
| Duodenum | straw | Negative | synthesis of polysaccharide           | 1.29E-03 | 38  |
|          | Rice  |          |                                       |          |     |
| Duodenum | straw | Negative | Viral Infection                       | 1.32E-03 | 259 |
|          | Rice  |          |                                       |          |     |
| Duodenum | straw | Negative | cytostasis                            | 1.37E-03 | 55  |
|          | Rice  |          |                                       |          |     |
| Duodenum | straw | Negative | branching of neurites                 | 1.37E-03 | 54  |
|          | Rice  |          |                                       |          |     |
| Duodenum | straw | Negative | heart rate                            | 1.37E-03 | 54  |
|          | Rice  |          |                                       |          |     |
| Duodenum | straw | Negative | quantity of muscle                    | 1.38E-03 | 29  |
|          | Rice  |          |                                       |          |     |
| Duodenum | straw | Negative | apoptosis of connective tissue cells  | 1.43E-03 | 57  |
|          | Rice  |          |                                       |          |     |
| Duodenum | straw | Negative | apoptosis of epithelial cell lines    | 1.44E-03 | 45  |
|          | Rice  |          |                                       |          |     |
| Duodenum | straw | Negative | quantity of diacylglycerol            | 1.45E-03 | 16  |
|          | Rice  |          |                                       |          |     |
| Duodenum | straw | Negative | cell movement of hepatoma cell lines  | 1.45E-03 | 22  |
|          | Rice  |          |                                       |          |     |
| Duodenum | straw | Negative | shape change of fibroblast cell lines | 1.45E-03 | 22  |
|          | Rice  |          |                                       |          |     |
| Duodenum | straw | Negative | vascularization                       | 1.45E-03 | 47  |
| Duodenum | Rice  | Negative | uptake of fatty acid                  | 1.45E-03 | 19  |

|          |       |          |                                           |          |     |
|----------|-------|----------|-------------------------------------------|----------|-----|
|          | straw |          |                                           |          |     |
|          | Rice  |          |                                           |          |     |
| Duodenum | straw | Negative | migration of muscle cells                 | 1.45E-03 | 35  |
|          | Rice  |          |                                           |          |     |
| Duodenum | straw | Negative | morphology of muscle cells                | 1.45E-03 | 35  |
|          | Rice  |          |                                           |          |     |
| Duodenum | straw | Negative | growth of organism                        | 1.47E-03 | 143 |
|          | Rice  |          |                                           |          |     |
| Duodenum | straw | Negative | bleeding of brain                         | 1.47E-03 | 18  |
|          | Rice  |          |                                           |          |     |
| Duodenum | straw | Negative | uptake of carbohydrate                    | 1.51E-03 | 56  |
|          | Rice  |          |                                           |          |     |
| Duodenum | straw | Negative | synthesis of carbohydrate                 | 1.51E-03 | 78  |
|          | Rice  |          |                                           |          |     |
| Duodenum | straw | Negative | colorectal carcinoma                      | 1.52E-03 | 562 |
|          | Rice  |          |                                           |          |     |
| Duodenum | straw | Negative | shape change of neurites                  | 1.52E-03 | 55  |
|          | Rice  |          |                                           |          |     |
| Duodenum | straw | Negative | development of lymphatic system component | 1.54E-03 | 59  |
|          | Rice  |          |                                           |          |     |
| Duodenum | straw | Negative | cell death of brain                       | 1.62E-03 | 56  |
|          | Rice  |          |                                           |          |     |
| Duodenum | straw | Negative | development of urinary tract              | 1.64E-03 | 55  |
|          | Rice  |          |                                           |          |     |
| Duodenum | straw | Negative | damage of central nervous system          | 1.74E-03 | 39  |
|          | Rice  |          |                                           |          |     |
| Duodenum | straw | Negative | shape change of neurons                   | 1.74E-03 | 56  |
|          | Rice  |          |                                           |          |     |
| Duodenum | straw | Negative | branching of neurons                      | 1.76E-03 | 55  |
|          | Rice  |          |                                           |          |     |
| Duodenum | straw | Negative | retraction of plasma membrane projections | 1.76E-03 | 18  |
|          | Rice  |          |                                           |          |     |
| Duodenum | straw | Negative | abnormal morphology of endothelial tissue | 1.77E-03 | 17  |
|          | Rice  |          |                                           |          |     |
| Duodenum | straw | Negative | abnormal morphology of brain              | 1.78E-03 | 81  |
|          | Rice  |          |                                           |          |     |
| Duodenum | straw | Negative | abnormality of respiratory system         | 1.79E-03 | 21  |
|          | Rice  |          |                                           |          |     |
| Duodenum | straw | Negative | differentiation of neurons                | 1.79E-03 | 76  |
|          | Rice  |          |                                           |          |     |
| Duodenum | straw | Negative | development of gastrointestinal tract     | 1.80E-03 | 51  |
|          | Rice  |          |                                           |          |     |
| Duodenum | straw | Negative | exocytosis by cells                       | 1.92E-03 | 28  |
| Duodenum | Rice  | Negative | morphology of skeletal muscle             | 1.92E-03 | 28  |



|          |       |          |                                               |          |     |  |
|----------|-------|----------|-----------------------------------------------|----------|-----|--|
|          | straw |          |                                               |          |     |  |
|          | Rice  |          |                                               |          |     |  |
| Duodenum | straw | Negative | keratosis                                     | 1.92E-03 | 27  |  |
|          | Rice  |          |                                               |          |     |  |
| Duodenum | straw | Negative | schizophrenia spectrum disorder               | 1.97E-03 | 81  |  |
|          | Rice  |          |                                               |          |     |  |
| Duodenum | straw | Negative | Schizophrenia                                 | 1.97E-03 | 78  |  |
|          | Rice  |          |                                               |          |     |  |
| Duodenum | straw | Negative | differentiation of muscle cell lines          | 2.00E-03 | 34  |  |
|          | Rice  |          |                                               |          |     |  |
| Duodenum | straw | Negative | formation of lamellipodia                     | 2.00E-03 | 34  |  |
|          | Rice  |          |                                               |          |     |  |
| Duodenum | straw | Negative | differentiation of muscle cells               | 2.02E-03 | 54  |  |
|          | Rice  |          |                                               |          |     |  |
| Duodenum | straw | Negative | morphology of neurons                         | 2.03E-03 | 77  |  |
|          | Rice  |          |                                               |          |     |  |
| Duodenum | straw | Negative | reorganization of cytoskeleton                | 2.03E-03 | 39  |  |
|          | Rice  |          |                                               |          |     |  |
| Duodenum | straw | Negative | cycling of centrosome                         | 2.06E-03 | 21  |  |
|          | Rice  |          |                                               |          |     |  |
| Duodenum | straw | Negative | strength of muscle                            | 2.06E-03 | 18  |  |
|          | Rice  |          |                                               |          |     |  |
| Duodenum | straw | Negative | migration of breast cancer cell lines         | 2.08E-03 | 48  |  |
|          | Rice  |          |                                               |          |     |  |
| Duodenum | straw | Negative | iris coloboma                                 | 2.08E-03 | 5   |  |
|          | Rice  |          |                                               |          |     |  |
| Duodenum | straw | Negative | lack of salivary gland                        | 2.08E-03 | 5   |  |
|          | Rice  |          |                                               |          |     |  |
| Duodenum | straw | Negative | concentration of lipid                        | 2.10E-03 | 138 |  |
|          | Rice  |          |                                               |          |     |  |
| Duodenum | straw | Negative | differentiation of nervous system             | 2.12E-03 | 89  |  |
|          | Rice  |          |                                               |          |     |  |
| Duodenum | straw | Negative | quantity of bone                              | 2.25E-03 | 48  |  |
|          | Rice  |          |                                               |          |     |  |
| Duodenum | straw | Negative | scattering of tumor cell lines                | 2.26E-03 | 11  |  |
|          | Rice  |          |                                               |          |     |  |
| Duodenum | straw | Negative | cell movement of muscle cells                 | 2.26E-03 | 37  |  |
|          | Rice  |          |                                               |          |     |  |
| Duodenum | straw | Negative | morphology of nervous tissue                  | 2.31E-03 | 79  |  |
|          | Rice  |          |                                               |          |     |  |
| Duodenum | straw | Negative | hypertrophy of cardiomyocytes                 | 2.33E-03 | 29  |  |
|          | Rice  |          |                                               |          |     |  |
| Duodenum | straw | Negative | cell death of B-lymphocyte derived cell lines | 2.38E-03 | 28  |  |
| Duodenum | Rice  | Negative | cell death of cerebral cortex cells           | 2.40E-03 | 45  |  |

|          |       |          |                                                 |          |     |
|----------|-------|----------|-------------------------------------------------|----------|-----|
|          | straw |          |                                                 |          |     |
|          | Rice  |          |                                                 |          |     |
| Duodenum | straw | Negative | quantity of muscle cells                        | 2.40E-03 | 26  |
|          | Rice  |          |                                                 |          |     |
| Duodenum | straw | Negative | maturation of cells                             | 2.40E-03 | 82  |
|          | Rice  |          |                                                 |          |     |
| Duodenum | straw | Negative | apoptosis of skin                               | 2.51E-03 | 22  |
|          | Rice  |          |                                                 |          |     |
| Duodenum | straw | Negative | morphology of central nervous system cells      | 2.53E-03 | 30  |
|          | Rice  |          |                                                 |          |     |
| Duodenum | straw | Negative | migration of embryonic cell lines               | 2.56E-03 | 20  |
|          | Rice  |          |                                                 |          |     |
| Duodenum | straw | Negative | morphology of mouth                             | 2.60E-03 | 29  |
|          | Rice  |          |                                                 |          |     |
| Duodenum | straw | Negative | abnormal morphology of axial skeleton           | 2.61E-03 | 39  |
|          | Rice  |          |                                                 |          |     |
| Duodenum | straw | Negative | dysgenesis                                      | 2.64E-03 | 95  |
|          | Rice  |          |                                                 |          |     |
| Duodenum | straw | Negative | cell movement of neutrophils                    | 2.70E-03 | 56  |
|          | Rice  |          |                                                 |          |     |
| Duodenum | straw | Negative | damage of brain                                 | 2.70E-03 | 37  |
|          | Rice  |          |                                                 |          |     |
| Duodenum | straw | Negative | gastrointestinal adenocarcinoma                 | 2.77E-03 | 639 |
|          | Rice  |          |                                                 |          |     |
| Duodenum | straw | Negative | dendritic growth/branching                      | 2.77E-03 | 43  |
|          | Rice  |          |                                                 |          |     |
| Duodenum | straw | Negative | apoptosis of tumor cells                        | 2.78E-03 | 54  |
|          | Rice  |          |                                                 |          |     |
| Duodenum | straw | Negative | proliferation of hematopoietic progenitor cells | 2.78E-03 | 47  |
|          | Rice  |          |                                                 |          |     |
| Duodenum | straw | Negative | formation of kidney                             | 2.81E-03 | 53  |
|          | Rice  |          |                                                 |          |     |
| Duodenum | straw | Negative | morphology of skeleton                          | 2.81E-03 | 53  |
|          | Rice  |          |                                                 |          |     |
| Duodenum | straw | Negative | quantity of centrosome                          | 2.84E-03 | 14  |
|          | Rice  |          |                                                 |          |     |
| Duodenum | straw | Negative | morphology of axial skeleton                    | 2.87E-03 | 40  |
|          | Rice  |          |                                                 |          |     |
| Duodenum | straw | Negative | epithelial-mesenchymal transition               | 2.90E-03 | 41  |
|          | Rice  |          |                                                 |          |     |
| Duodenum | straw | Negative | size of head                                    | 2.90E-03 | 41  |
|          | Rice  |          |                                                 |          |     |
| Duodenum | straw | Negative | morphology of second branchial arch             | 2.92E-03 | 10  |
| Duodenum | Rice  | Negative | cell death of stem cells                        | 2.92E-03 | 20  |

|          |       |          |                                      |          |     |
|----------|-------|----------|--------------------------------------|----------|-----|
|          | straw |          |                                      |          |     |
|          | Rice  |          |                                      |          |     |
| Duodenum | straw | Negative | metabolism of polysaccharide         | 2.97E-03 | 46  |
|          | Rice  |          |                                      |          |     |
| Duodenum | straw | Negative | apoptosis of cerebral cortex cells   | 2.98E-03 | 24  |
|          | Rice  |          |                                      |          |     |
| Duodenum | straw | Negative | oscillation of Ca <sup>2+</sup>      | 2.98E-03 | 16  |
|          | Rice  |          |                                      |          |     |
| Duodenum | straw | Negative | hyperplasia of epidermis             | 2.99E-03 | 25  |
|          | Rice  |          |                                      |          |     |
| Duodenum | straw | Negative | weight gain                          | 3.08E-03 | 58  |
|          | Rice  |          |                                      |          |     |
| Duodenum | straw | Negative | cell movement of leukocytes          | 3.12E-03 | 130 |
|          | Rice  |          |                                      |          |     |
| Duodenum | straw | Negative | shape change of tumor cell lines     | 3.12E-03 | 32  |
|          | Rice  |          |                                      |          |     |
| Duodenum | straw | Negative | cell death of heart cells            | 3.17E-03 | 43  |
|          | Rice  |          |                                      |          |     |
| Duodenum | straw | Negative | Hypoplasia                           | 3.17E-03 | 89  |
|          | Rice  |          |                                      |          |     |
| Duodenum | straw | Negative | uptake of monosaccharide             | 3.27E-03 | 51  |
|          | Rice  |          |                                      |          |     |
| Duodenum | straw | Negative | ubiquitination                       | 3.34E-03 | 62  |
|          | Rice  |          |                                      |          |     |
| Duodenum | straw | Negative | cell death of neuroglia              | 3.35E-03 | 26  |
|          | Rice  |          |                                      |          |     |
| Duodenum | straw | Negative | anoikis                              | 3.37E-03 | 25  |
|          | Rice  |          |                                      |          |     |
| Duodenum | straw | Negative | peripheral vascular disease          | 3.37E-03 | 69  |
|          | Rice  |          |                                      |          |     |
| Duodenum | straw | Negative | binding of DNA fragment              | 3.48E-03 | 17  |
|          | Rice  |          |                                      |          |     |
| Duodenum | straw | Negative | separation of mitotic centrosome     | 3.56E-03 | 4   |
|          | Rice  |          |                                      |          |     |
| Duodenum | straw | Negative | apoptosis of neuroglia               | 3.56E-03 | 21  |
|          | Rice  |          |                                      |          |     |
| Duodenum | straw | Negative | neurodegeneration of cerebral cortex | 3.57E-03 | 15  |
|          | Rice  |          |                                      |          |     |
| Duodenum | straw | Negative | ubiquitination of protein            | 3.63E-03 | 61  |
|          | Rice  |          |                                      |          |     |
| Duodenum | straw | Negative | colorectal adenocarcinoma            | 3.67E-03 | 542 |
|          | Rice  |          |                                      |          |     |
| Duodenum | straw | Negative | development of sensory organ         | 3.67E-03 | 98  |
| Duodenum | Rice  | Negative | cell death of heart                  | 3.67E-03 | 44  |

|          |       |          |                                                |          |     |
|----------|-------|----------|------------------------------------------------|----------|-----|
|          | straw |          |                                                |          |     |
|          | Rice  |          |                                                |          |     |
| Duodenum | straw | Negative | skin abnormality                               | 3.67E-03 | 44  |
|          | Rice  |          |                                                |          |     |
| Duodenum | straw | Negative | morphogenesis of epithelial tissue             | 3.77E-03 | 32  |
|          | Rice  |          |                                                |          |     |
| Duodenum | straw | Negative | morphology of rib                              | 3.88E-03 | 18  |
|          | Rice  |          |                                                |          |     |
| Duodenum | straw | Negative | growth of cartilage tissue                     | 3.88E-03 | 20  |
|          | Rice  |          |                                                |          |     |
| Duodenum | straw | Negative | muscular hypertrophy                           | 3.91E-03 | 40  |
|          | Rice  |          |                                                |          |     |
| Duodenum | straw | Negative | abnormal morphology of dilated right ventricle | 3.94E-03 | 10  |
|          | Rice  |          |                                                |          |     |
| Duodenum | straw | Negative | limb development                               | 3.94E-03 | 45  |
|          | Rice  |          |                                                |          |     |
| Duodenum | straw | Negative | abnormal morphology of skeleton                | 3.96E-03 | 51  |
|          | Rice  |          |                                                |          |     |
| Duodenum | straw | Negative | closure of embryonic tissue                    | 4.12E-03 | 30  |
|          | Rice  |          |                                                |          |     |
| Duodenum | straw | Negative | hypertrophy of heart cells                     | 4.14E-03 | 32  |
|          | Rice  |          |                                                |          |     |
| Duodenum | straw | Negative | cell viability of fibroblast cell lines        | 4.25E-03 | 25  |
|          | Rice  |          |                                                |          |     |
| Duodenum | straw | Negative | secretion of alpha granules                    | 4.31E-03 | 6   |
|          | Rice  |          |                                                |          |     |
| Duodenum | straw | Negative | abnormal morphology of neurons                 | 4.31E-03 | 68  |
|          | Rice  |          |                                                |          |     |
| Duodenum | straw | Negative | formation of thymus gland                      | 4.31E-03 | 33  |
|          | Rice  |          |                                                |          |     |
| Duodenum | straw | Negative | autosomal dominant disease                     | 4.31E-03 | 109 |
|          | Rice  |          |                                                |          |     |
| Duodenum | straw | Negative | abnormal morphology of artery                  | 4.31E-03 | 31  |
|          | Rice  |          |                                                |          |     |
| Duodenum | straw | Negative | differentiation of keratinocytes               | 4.31E-03 | 31  |
|          | Rice  |          |                                                |          |     |
| Duodenum | straw | Negative | closure of neural tube                         | 4.40E-03 | 28  |
|          | Rice  |          |                                                |          |     |
| Duodenum | straw | Negative | cardiogenesis                                  | 4.41E-03 | 83  |
|          | Rice  |          |                                                |          |     |
| Duodenum | straw | Negative | cell death of tumor cells                      | 4.41E-03 | 67  |
|          | Rice  |          |                                                |          |     |
| Duodenum | straw | Negative | tubulation of vascular endothelial cells       | 4.41E-03 | 20  |
| Duodenum | Rice  | Negative | metastatic colorectal cancer                   | 4.42E-03 | 38  |

|          |       |          |                                             |          |     |
|----------|-------|----------|---------------------------------------------|----------|-----|
|          | straw |          |                                             |          |     |
|          | Rice  |          |                                             |          |     |
| Duodenum | straw | Negative | cell death of brain cells                   | 4.48E-03 | 51  |
|          | Rice  |          | abnormal morphology of vascular endothelial |          |     |
| Duodenum | straw | Negative | cells                                       | 4.48E-03 | 12  |
|          | Rice  |          |                                             |          |     |
| Duodenum | straw | Negative | concentration of Ca <sup>2+</sup>           | 4.48E-03 | 27  |
|          | Rice  |          |                                             |          |     |
| Duodenum | straw | Negative | hepatocellular carcinoma                    | 4.54E-03 | 624 |
|          | Rice  |          |                                             |          |     |
| Duodenum | straw | Negative | sensory system development                  | 4.73E-03 | 24  |
|          | Rice  |          |                                             |          |     |
| Duodenum | straw | Negative | cell death of skin                          | 4.73E-03 | 23  |
|          | Rice  |          |                                             |          |     |
| Duodenum | straw | Negative | abnormal morphology of rib                  | 4.74E-03 | 17  |
|          | Rice  |          |                                             |          |     |
| Duodenum | straw | Negative | cell death of muscle cells                  | 4.74E-03 | 61  |
|          | Rice  |          |                                             |          |     |
| Duodenum | straw | Negative | GATA2 deficiency                            | 4.74E-03 | 7   |
|          | Rice  |          |                                             |          |     |
| Duodenum | straw | Negative | cell death of central nervous system cells  | 4.74E-03 | 54  |
|          | Rice  |          |                                             |          |     |
| Duodenum | straw | Negative | migration of hepatoma cell lines            | 4.74E-03 | 19  |
|          | Rice  |          |                                             |          |     |
| Duodenum | straw | Negative | proliferation of chondrocytes               | 4.74E-03 | 19  |
|          | Rice  |          |                                             |          |     |
| Duodenum | straw | Negative | cell death of hepatoma cell lines           | 4.74E-03 | 34  |
|          | Rice  |          |                                             |          |     |
| Duodenum | straw | Negative | proliferation of epithelial cell lines      | 4.80E-03 | 44  |
|          | Rice  |          |                                             |          |     |
| Duodenum | straw | Negative | damage of nervous system                    | 4.80E-03 | 43  |
|          | Rice  |          |                                             |          |     |
| Duodenum | straw | Negative | morphology of skull                         | 4.80E-03 | 43  |
|          | Rice  |          |                                             |          |     |
| Duodenum | straw | Negative | function of endothelial cells               | 4.81E-03 | 13  |
|          | Rice  |          |                                             |          |     |
| Duodenum | straw | Negative | synthesis of phospholipid                   | 4.84E-03 | 35  |
|          | Rice  |          |                                             |          |     |
| Duodenum | straw | Negative | differentiation of epidermal cells          | 5.01E-03 | 33  |
|          | Rice  |          |                                             |          |     |
| Duodenum | straw | Negative | hyperplasia of tissue                       | 5.12E-03 | 38  |
|          | Rice  |          |                                             |          |     |
| Duodenum | straw | Negative | frequency of head and neck tumor            | 5.14E-03 | 5   |
| Duodenum | Rice  | Negative | long-term potentiation of granule cells     | 5.14E-03 | 5   |

|          |       |          |                                              |          |     |
|----------|-------|----------|----------------------------------------------|----------|-----|
|          | straw |          |                                              |          |     |
|          | Rice  |          |                                              |          |     |
| Duodenum | straw | Negative | necrosis of tumor                            | 5.16E-03 | 68  |
|          | Rice  |          |                                              |          |     |
| Duodenum | straw | Negative | abnormal morphology of skull                 | 5.16E-03 | 42  |
|          | Rice  |          |                                              |          |     |
| Duodenum | straw | Negative | oxidation of lipid                           | 5.16E-03 | 41  |
|          | Rice  |          |                                              |          |     |
| Duodenum | straw | Negative | binding of endothelial cells                 | 5.22E-03 | 23  |
|          | Rice  |          |                                              |          |     |
| Duodenum | straw | Negative | formation of cells                           | 5.22E-03 | 161 |
|          | Rice  |          |                                              |          |     |
| Duodenum | straw | Negative | dyspnea                                      | 5.22E-03 | 28  |
|          | Rice  |          |                                              |          |     |
| Duodenum | straw | Negative | autophagy                                    | 5.31E-03 | 67  |
|          | Rice  |          |                                              |          |     |
| Duodenum | straw | Negative | mass of adipose tissue                       | 5.43E-03 | 37  |
|          | Rice  |          |                                              |          |     |
| Duodenum | straw | Negative | apoptosis of B-lymphocyte derived cell lines | 5.60E-03 | 26  |
|          | Rice  |          |                                              |          |     |
| Duodenum | straw | Negative | papilloma                                    | 5.60E-03 | 26  |
|          | Rice  |          |                                              |          |     |
| Duodenum | straw | Negative | Edema                                        | 5.64E-03 | 62  |
|          | Rice  |          |                                              |          |     |
| Duodenum | straw | Negative | cell death of muscle                         | 5.64E-03 | 62  |
|          | Rice  |          |                                              |          |     |
| Duodenum | straw | Negative | quantity of epithelial tissue                | 5.71E-03 | 35  |
|          | Rice  |          |                                              |          |     |
| Duodenum | straw | Negative | engulfment of cells                          | 5.72E-03 | 72  |
|          | Rice  |          |                                              |          |     |
| Duodenum | straw | Negative | grip strength                                | 5.72E-03 | 16  |
|          | Rice  |          |                                              |          |     |
| Duodenum | straw | Negative | cytostasis of tumor cell lines               | 5.73E-03 | 32  |
|          | Rice  |          |                                              |          |     |
| Duodenum | straw | Negative | migration of lung cancer cell lines          | 5.77E-03 | 21  |
|          | Rice  |          |                                              |          |     |
| Duodenum | straw | Negative | cell movement of cancer cells                | 5.80E-03 | 30  |
|          | Rice  |          |                                              |          |     |
| Duodenum | straw | Negative | benign neoplasia                             | 5.84E-03 | 152 |
|          | Rice  |          |                                              |          |     |
| Duodenum | straw | Negative | atelectasis                                  | 5.84E-03 | 18  |
|          | Rice  |          |                                              |          |     |
| Duodenum | straw | Negative | oral cancer                                  | 5.87E-03 | 43  |
| Duodenum | Rice  | Negative | fusion of cellular membrane                  | 5.88E-03 | 15  |

|          |       |          |                                                |          |     |
|----------|-------|----------|------------------------------------------------|----------|-----|
|          | straw |          |                                                |          |     |
|          | Rice  |          |                                                |          |     |
| Duodenum | straw | Negative | chemotaxis of phagocytes                       | 5.90E-03 | 54  |
|          | Rice  |          |                                                |          |     |
| Duodenum | straw | Negative | targeting of protein                           | 5.92E-03 | 27  |
|          | Rice  |          |                                                |          |     |
| Duodenum | straw | Negative | dilation of heart ventricle                    | 5.92E-03 | 14  |
|          | Rice  |          |                                                |          |     |
| Duodenum | straw | Negative | abnormal morphology of skeletal muscle         | 6.14E-03 | 26  |
|          | Rice  |          |                                                |          |     |
| Duodenum | straw | Negative | hepatobiliary system cancer                    | 6.20E-03 | 644 |
|          | Rice  |          |                                                |          |     |
| Duodenum | straw | Negative | cell movement of tumor cells                   | 6.20E-03 | 36  |
|          | Rice  |          |                                                |          |     |
| Duodenum | straw | Negative | formation of epidermis                         | 6.20E-03 | 36  |
|          | Rice  |          |                                                |          |     |
| Duodenum | straw | Negative | metabolism of phospholipid                     | 6.20E-03 | 44  |
|          | Rice  |          |                                                |          |     |
| Duodenum | straw | Negative | respiratory failure                            | 6.28E-03 | 25  |
|          | Rice  |          |                                                |          |     |
| Duodenum | straw | Negative | migration of smooth muscle cells               | 6.30E-03 | 30  |
|          | Rice  |          |                                                |          |     |
| Duodenum | straw | Negative | cell viability of central nervous system cells | 6.41E-03 | 24  |
|          | Rice  |          |                                                |          |     |
| Duodenum | straw | Negative | smooth muscle tumor                            | 6.45E-03 | 55  |
|          | Rice  |          |                                                |          |     |
| Duodenum | straw | Negative | length of cells                                | 6.52E-03 | 22  |
|          | Rice  |          |                                                |          |     |
| Duodenum | straw | Negative | mass of organism                               | 6.61E-03 | 60  |
|          | Rice  |          |                                                |          |     |
| Duodenum | straw | Negative | long-term memory                               | 6.62E-03 | 16  |
|          | Rice  |          |                                                |          |     |
| Duodenum | straw | Negative | retraction of neurites                         | 6.62E-03 | 16  |
|          | Rice  |          |                                                |          |     |
| Duodenum | straw | Negative | Neurodegeneration                              | 6.62E-03 | 56  |
|          | Rice  |          |                                                |          |     |
| Duodenum | straw | Negative | differentiation of brain                       | 6.67E-03 | 18  |
|          | Rice  |          |                                                |          |     |
| Duodenum | straw | Negative | cell movement of smooth muscle cells           | 6.73E-03 | 32  |
|          | Rice  |          |                                                |          |     |
| Duodenum | straw | Negative | morphology of skin                             | 6.83E-03 | 50  |
|          | Rice  |          |                                                |          |     |
| Duodenum | straw | Negative | morphology of astrocytes                       | 7.09E-03 | 13  |
| Duodenum | Rice  | Negative | cell viability of osteoblasts                  | 7.19E-03 | 7   |

|          |       |          |                                           |          |     |
|----------|-------|----------|-------------------------------------------|----------|-----|
|          | straw |          |                                           |          |     |
|          | Rice  |          |                                           |          |     |
| Duodenum | straw | Negative | apoptosis of dermal cells                 | 7.24E-03 | 20  |
|          | Rice  |          |                                           |          |     |
| Duodenum | straw | Negative | abnormal morphology of fornix             | 7.25E-03 | 6   |
|          | Rice  |          | metabolism of nucleic acid component or   |          |     |
| Duodenum | straw | Negative | derivative                                | 7.25E-03 | 89  |
|          | Rice  |          |                                           |          |     |
| Duodenum | straw | Negative | cell movement of embryonic cell lines     | 7.25E-03 | 23  |
|          | Rice  |          |                                           |          |     |
| Duodenum | straw | Negative | cell viability of brain cells             | 7.30E-03 | 21  |
|          | Rice  |          |                                           |          |     |
| Duodenum | straw | Negative | MAPKKK cascade                            | 7.32E-03 | 39  |
|          | Rice  |          |                                           |          |     |
| Duodenum | straw | Negative | liver tumor                               | 7.67E-03 | 644 |
|          | Rice  |          |                                           |          |     |
| Duodenum | straw | Negative | cell death of cortical neurons            | 7.69E-03 | 34  |
|          | Rice  |          |                                           |          |     |
| Duodenum | straw | Negative | chondrogenesis                            | 7.73E-03 | 11  |
|          | Rice  |          |                                           |          |     |
| Duodenum | straw | Negative | cell death of pheochromocytoma cell lines | 7.73E-03 | 25  |
|          | Rice  |          |                                           |          |     |
| Duodenum | straw | Negative | fusion of muscle cells                    | 7.73E-03 | 16  |
|          | Rice  |          |                                           |          |     |
| Duodenum | straw | Negative | invasion of fibroblast cell lines         | 7.73E-03 | 16  |
|          | Rice  |          |                                           |          |     |
| Duodenum | straw | Negative | differentiation of skin                   | 7.73E-03 | 35  |
|          | Rice  |          |                                           |          |     |
| Duodenum | straw | Negative | proliferation of endothelial cells        | 7.85E-03 | 56  |
|          | Rice  |          |                                           |          |     |
| Duodenum | straw | Negative | muscle tumor                              | 7.90E-03 | 64  |
|          | Rice  |          |                                           |          |     |
| Duodenum | straw | Negative | neovascularization                        | 7.98E-03 | 32  |
|          | Rice  |          |                                           |          |     |
| Duodenum | straw | Negative | apoptosis of muscle                       | 8.05E-03 | 48  |
|          | Rice  |          |                                           |          |     |
| Duodenum | straw | Negative | ruffling                                  | 8.08E-03 | 23  |
|          | Rice  |          |                                           |          |     |
| Duodenum | straw | Negative | seizure disorder                          | 8.22E-03 | 81  |
|          | Rice  |          |                                           |          |     |
| Duodenum | straw | Negative | degeneration of nervous system            | 8.28E-03 | 52  |
|          | Rice  |          |                                           |          |     |
| Duodenum | straw | Negative | proliferation of myoblasts                | 8.30E-03 | 12  |
| Duodenum | Rice  | Negative | differentiation of brain cells            | 8.35E-03 | 17  |



|          |        |          |                                            |          |      |  |
|----------|--------|----------|--------------------------------------------|----------|------|--|
|          | straw  |          |                                            |          |      |  |
|          | Rice   |          |                                            |          |      |  |
| Duodenum | straw  | Negative | apoptosis of renal glomerulus              | 8.42E-03 | 14   |  |
|          | Rice   |          |                                            |          |      |  |
| Duodenum | straw  | Negative | cell spreading of fibroblast cell lines    | 8.42E-03 | 14   |  |
|          | Rice   |          |                                            |          |      |  |
| Duodenum | straw  | Negative | migration of cancer cells                  | 8.42E-03 | 37   |  |
|          | Rice   |          |                                            |          |      |  |
| Duodenum | straw  | Negative | hypertrophy of cardiac muscle              | 8.42E-03 | 31   |  |
|          | Rice   |          |                                            |          |      |  |
| Duodenum | straw  | Negative | colon carcinoma                            | 8.45E-03 | 523  |  |
|          | Rice   |          |                                            |          |      |  |
| Duodenum | straw  | Negative | apoptosis of glomerular cells              | 8.45E-03 | 13   |  |
|          | Rice   |          |                                            |          |      |  |
| Duodenum | straw  | Negative | hypoactivity of mice                       | 8.62E-03 | 32   |  |
|          | Rice   |          |                                            |          |      |  |
| Duodenum | straw  | Negative | hypertrophy of tissue                      | 8.68E-03 | 47   |  |
|          | Rice   |          |                                            |          |      |  |
| Duodenum | straw  | Negative | liver cancer                               | 8.75E-03 | 639  |  |
|          | Rice   |          |                                            |          |      |  |
| Duodenum | straw  | Negative | abnormal morphology of type II pneumocytes | 8.86E-03 | 9    |  |
|          | Rice   |          |                                            |          |      |  |
| Duodenum | straw  | Negative | apoptosis of hepatoma cell lines           | 8.92E-03 | 30   |  |
|          | Rice   |          |                                            |          |      |  |
| Duodenum | straw  | Negative | development of antigen presenting cells    | 8.92E-03 | 16   |  |
|          | Rice   |          |                                            |          |      |  |
| Duodenum | straw  | Negative | morphology of joint                        | 8.92E-03 | 16   |  |
|          | Rice   |          |                                            |          |      |  |
| Duodenum | straw  | Negative | assembly of protein-protein complex        | 9.02E-03 | 36   |  |
|          | Rice   |          |                                            |          |      |  |
| Duodenum | straw  | Negative | morphology of tumor cell lines             | 9.02E-03 | 38   |  |
|          | Rice   |          |                                            |          |      |  |
| Duodenum | straw  | Negative | cell death of dermal cells                 | 9.16E-03 | 21   |  |
|          | Rice   |          |                                            |          |      |  |
| Duodenum | straw  | Negative | export of molecule                         | 9.55E-03 | 53   |  |
|          | Rice   |          |                                            |          |      |  |
| Duodenum | straw  | Negative | cell death of cardiomyocytes               | 9.67E-03 | 40   |  |
|          | Rice   |          |                                            |          |      |  |
| Duodenum | straw  | Negative | formation of T lymphocytes                 | 9.76E-03 | 24   |  |
|          | Rice   |          |                                            |          |      |  |
| Duodenum | straw  | Negative | apoptosis of heart cells                   | 9.78E-03 | 36   |  |
|          | Corn   |          |                                            |          |      |  |
| Duodenum | stover | Positive | organismal death                           | 2.21E-42 | 1009 |  |
| Duodenum | Corn   | Positive | proliferation of cells                     | 3.67E-42 | 1445 |  |

|          |        |          |                              |          |      |
|----------|--------|----------|------------------------------|----------|------|
|          | stover |          |                              |          |      |
|          | Corn   |          |                              |          |      |
| Duodenum | stover | Positive | morbidity or mortality       | 5.90E-42 | 1017 |
|          | Corn   |          |                              |          |      |
| Duodenum | stover | Positive | cancer                       | 6.24E-34 | 3608 |
|          | Corn   |          |                              |          |      |
| Duodenum | stover | Positive | cell death                   | 9.18E-34 | 1289 |
|          | Corn   |          |                              |          |      |
| Duodenum | stover | Positive | malignant solid tumor        | 1.64E-32 | 3563 |
|          | Corn   |          |                              |          |      |
| Duodenum | stover | Positive | necrosis                     | 1.83E-27 | 1005 |
|          | Corn   |          |                              |          |      |
| Duodenum | stover | Positive | morphology of cells          | 9.13E-27 | 789  |
|          | Corn   |          |                              |          |      |
| Duodenum | stover | Positive | apoptosis                    | 1.45E-26 | 1024 |
|          | Corn   |          |                              |          |      |
| Duodenum | stover | Positive | organization of cytoplasm    | 1.36E-25 | 640  |
|          | Corn   |          |                              |          |      |
| Duodenum | stover | Positive | cell movement                | 5.46E-23 | 834  |
|          | Corn   |          |                              |          |      |
| Duodenum | stover | Positive | transport of molecule        | 8.55E-22 | 652  |
|          | Corn   |          |                              |          |      |
| Duodenum | stover | Positive | organization of cytoskeleton | 1.64E-21 | 575  |
|          | Corn   |          |                              |          |      |
| Duodenum | stover | Positive | expression of RNA            | 6.98E-21 | 830  |
|          | Corn   |          |                              |          |      |
| Duodenum | stover | Positive | cellular homeostasis         | 8.55E-21 | 616  |
|          | Corn   |          |                              |          |      |
| Duodenum | stover | Positive | migration of cells           | 6.04E-19 | 738  |
|          | Corn   |          |                              |          |      |
| Duodenum | stover | Positive | transcription                | 2.31E-18 | 766  |
|          | Corn   |          |                              |          |      |
| Duodenum | stover | Positive | transcription of RNA         | 7.64E-18 | 717  |
|          | Corn   |          |                              |          |      |
| Duodenum | stover | Positive | differentiation of cells     | 1.01E-17 | 848  |
|          | Corn   |          |                              |          |      |
| Duodenum | stover | Positive | size of body                 | 1.17E-17 | 365  |
|          | Corn   |          |                              |          |      |
| Duodenum | stover | Positive | abdominal neoplasm           | 1.43E-17 | 2910 |
|          | Corn   |          |                              |          |      |
| Duodenum | stover | Positive | abnormal morphology of cells | 2.73E-17 | 511  |
|          | Corn   |          |                              |          |      |
| Duodenum | stover | Positive | cell survival                | 5.06E-17 | 554  |
| Duodenum | Corn   | Positive | microtubule dynamics         | 5.74E-17 | 481  |

|          |                |          |                                              |          |      |
|----------|----------------|----------|----------------------------------------------|----------|------|
|          | stover<br>Corn |          |                                              |          |      |
| Duodenum | stover<br>Corn | Positive | neoplasia of epithelial tissue               | 1.06E-16 | 2924 |
| Duodenum | stover<br>Corn | Positive | cell movement of tumor cell lines            | 1.34E-16 | 361  |
| Duodenum | stover<br>Corn | Positive | tumorigenesis of tissue                      | 1.38E-16 | 2968 |
| Duodenum | stover<br>Corn | Positive | perinatal death                              | 1.42E-16 | 265  |
| Duodenum | stover<br>Corn | Positive | epithelial cancer                            | 1.43E-16 | 2897 |
| Duodenum | stover<br>Corn | Positive | Movement Disorders                           | 2.78E-16 | 434  |
| Duodenum | stover<br>Corn | Positive | abdominal cancer                             | 6.58E-16 | 2866 |
| Duodenum | stover<br>Corn | Positive | morphology of cardiovascular system          | 8.09E-16 | 272  |
| Duodenum | stover<br>Corn | Positive | angiogenesis                                 | 2.20E-15 | 376  |
| Duodenum | stover<br>Corn | Positive | transcription of DNA                         | 2.61E-15 | 594  |
| Duodenum | stover<br>Corn | Positive | Viral Infection                              | 2.62E-15 | 620  |
| Duodenum | stover<br>Corn | Positive | cell death of tumor cell lines               | 3.37E-15 | 590  |
| Duodenum | stover<br>Corn | Positive | cell viability                               | 8.25E-15 | 511  |
| Duodenum | stover<br>Corn | Positive | migration of tumor cell lines                | 1.33E-14 | 300  |
| Duodenum | stover<br>Corn | Positive | growth of organism                           | 1.50E-14 | 347  |
| Duodenum | stover<br>Corn | Positive | quantity of cells                            | 3.79E-14 | 666  |
| Duodenum | stover<br>Corn | Positive | abnormal morphology of cardiovascular system | 5.72E-14 | 246  |
| Duodenum | stover<br>Corn | Positive | development of body trunk                    | 7.80E-14 | 443  |
| Duodenum | stover<br>Corn | Positive | vasculogenesis                               | 1.47E-13 | 307  |
| Duodenum | stover<br>Corn | Positive | apoptosis of tumor cell lines                | 2.54E-13 | 473  |
| Duodenum | stover         | Positive | proliferation of tumor cell lines            | 3.11E-13 | 587  |
| Duodenum | Corn           | Positive | development of vasculature                   | 3.15E-13 | 187  |

|          |        |          |                                           |          |      |
|----------|--------|----------|-------------------------------------------|----------|------|
|          | stover |          |                                           |          |      |
|          | Corn   |          |                                           |          |      |
| Duodenum | stover | Positive | transactivation                           | 3.78E-13 | 247  |
|          | Corn   |          |                                           |          |      |
| Duodenum | stover | Positive | abnormal morphology of thoracic cavity    | 7.91E-13 | 249  |
|          | Corn   |          |                                           |          |      |
| Duodenum | stover | Positive | disorder of basal ganglia                 | 1.31E-12 | 314  |
|          | Corn   |          |                                           |          |      |
| Duodenum | stover | Positive | transactivation of RNA                    | 1.51E-12 | 232  |
|          | Corn   |          |                                           |          |      |
| Duodenum | stover | Positive | abnormal morphology of body cavity        | 1.80E-12 | 445  |
|          | Corn   |          |                                           |          |      |
| Duodenum | stover | Positive | digestive system cancer                   | 1.84E-12 | 2475 |
|          | Corn   |          |                                           |          |      |
| Duodenum | stover | Positive | invasion of cells                         | 1.85E-12 | 350  |
|          | Corn   |          |                                           |          |      |
| Duodenum | stover | Positive | formation of cellular protrusions         | 2.55E-12 | 361  |
|          | Corn   |          |                                           |          |      |
| Duodenum | stover | Positive | digestive organ tumor                     | 3.81E-12 | 2494 |
|          | Corn   |          |                                           |          |      |
| Duodenum | stover | Positive | small GTPase mediated signal transduction | 4.13E-12 | 92   |
|          | Corn   |          |                                           |          |      |
| Duodenum | stover | Positive | morphology of body cavity                 | 4.22E-12 | 461  |
|          | Corn   |          |                                           |          |      |
| Duodenum | stover | Positive | neuromuscular disease                     | 4.22E-12 | 353  |
|          | Corn   |          |                                           |          |      |
| Duodenum | stover | Positive | cell death of connective tissue cells     | 4.43E-12 | 252  |
|          | Corn   |          |                                           |          |      |
| Duodenum | stover | Positive | ubiquitination                            | 4.61E-12 | 152  |
|          | Corn   |          |                                           |          |      |
| Duodenum | stover | Positive | ubiquitination of protein                 | 4.66E-12 | 150  |
|          | Corn   |          |                                           |          |      |
| Duodenum | stover | Positive | protein kinase cascade                    | 5.48E-12 | 184  |
|          | Corn   |          |                                           |          |      |
| Duodenum | stover | Positive | neonatal death                            | 1.95E-11 | 189  |
|          | Corn   |          |                                           |          |      |
| Duodenum | stover | Positive | proliferation of connective tissue cells  | 3.43E-11 | 245  |
|          | Corn   |          |                                           |          |      |
| Duodenum | stover | Positive | neurological signs                        | 3.82E-11 | 266  |
|          | Corn   |          |                                           |          |      |
| Duodenum | stover | Positive | degeneration of cells                     | 4.18E-11 | 152  |
|          | Corn   |          |                                           |          |      |
| Duodenum | stover | Positive | development of cytoplasm                  | 5.40E-11 | 196  |
| Duodenum | Corn   | Positive | cell viability of tumor cell lines        | 5.46E-11 | 311  |

|          |        |          |                                       |          |     |
|----------|--------|----------|---------------------------------------|----------|-----|
|          | stover |          |                                       |          |     |
|          | Corn   |          |                                       |          |     |
| Duodenum | stover | Positive | morphology of nervous system          | 1.36E-10 | 311 |
|          | Corn   |          |                                       |          |     |
| Duodenum | stover | Positive | growth of connective tissue           | 1.50E-10 | 261 |
|          | Corn   |          |                                       |          |     |
| Duodenum | stover | Positive | dyskinesia                            | 1.58E-10 | 251 |
|          | Corn   |          |                                       |          |     |
| Duodenum | stover | Positive | cell cycle progression                | 1.78E-10 | 402 |
|          | Corn   |          |                                       |          |     |
| Duodenum | stover | Positive | neuronal cell death                   | 1.78E-10 | 274 |
|          | Corn   |          |                                       |          |     |
| Duodenum | stover | Positive | morphology of heart                   | 1.93E-10 | 173 |
|          | Corn   |          |                                       |          |     |
| Duodenum | stover | Positive | growth of embryo                      | 2.69E-10 | 199 |
|          | Corn   |          |                                       |          |     |
| Duodenum | stover | Positive | Growth Failure                        | 3.35E-10 | 243 |
|          | Corn   |          |                                       |          |     |
| Duodenum | stover | Positive | formation of cytoskeleton             | 3.75E-10 | 161 |
|          | Corn   |          |                                       |          |     |
| Duodenum | stover | Positive | behavior                              | 4.74E-10 | 380 |
|          | Corn   |          |                                       |          |     |
| Duodenum | stover | Positive | activation of DNA endogenous promoter | 5.02E-10 | 455 |
|          | Corn   |          |                                       |          |     |
| Duodenum | stover | Positive | size of embryo                        | 6.01E-10 | 153 |
|          | Corn   |          |                                       |          |     |
| Duodenum | stover | Positive | Huntington's Disease                  | 6.97E-10 | 233 |
|          | Corn   |          |                                       |          |     |
| Duodenum | stover | Positive | quantity of connective tissue         | 7.59E-10 | 243 |
|          | Corn   |          |                                       |          |     |
| Duodenum | stover | Positive | fibrogenesis                          | 7.86E-10 | 173 |
|          | Corn   |          |                                       |          |     |
| Duodenum | stover | Positive | abnormal morphology of nervous system | 1.03E-09 | 286 |
|          | Corn   |          |                                       |          |     |
| Duodenum | stover | Positive | degeneration of nervous system        | 1.07E-09 | 126 |
|          | Corn   |          |                                       |          |     |
| Duodenum | stover | Positive | abnormal morphology of heart          | 1.15E-09 | 162 |
|          | Corn   |          |                                       |          |     |
| Duodenum | stover | Positive | concentration of lipid                | 1.16E-09 | 316 |
|          | Corn   |          |                                       |          |     |
| Duodenum | stover | Positive | development of connective tissue      | 1.54E-09 | 157 |
|          | Corn   |          |                                       |          |     |
| Duodenum | stover | Positive | proliferation of neuronal cells       | 1.55E-09 | 232 |
| Duodenum | Corn   | Positive | metabolism of carbohydrate            | 1.69E-09 | 248 |

|          |        |          |                                      |          |     |
|----------|--------|----------|--------------------------------------|----------|-----|
|          | stover |          |                                      |          |     |
|          | Corn   |          |                                      |          |     |
| Duodenum | stover | Positive | benign neoplasia                     | 1.69E-09 | 355 |
|          | Corn   |          |                                      |          |     |
| Duodenum | stover | Positive | seizures                             | 1.99E-09 | 167 |
|          | Corn   |          |                                      |          |     |
| Duodenum | stover | Positive | development of epithelial tissue     | 2.05E-09 | 210 |
|          | Corn   |          |                                      |          |     |
| Duodenum | stover | Positive | organization of organelle            | 2.29E-09 | 218 |
|          | Corn   |          |                                      |          |     |
| Duodenum | stover | Positive | differentiation of muscle cell lines | 2.73E-09 | 77  |
|          | Corn   |          |                                      |          |     |
| Duodenum | stover | Positive | metabolism of protein                | 2.98E-09 | 370 |
|          | Corn   |          |                                      |          |     |
| Duodenum | stover | Positive | quantity of blood cells              | 3.56E-09 | 388 |
|          | Corn   |          |                                      |          |     |
| Duodenum | stover | Positive | morphology of head                   | 3.70E-09 | 336 |
|          | Corn   |          |                                      |          |     |
| Duodenum | stover | Positive | growth of epithelial tissue          | 4.54E-09 | 267 |
|          | Corn   |          |                                      |          |     |
| Duodenum | stover | Positive | Neurodegeneration                    | 5.81E-09 | 132 |
|          | Corn   |          |                                      |          |     |
| Duodenum | stover | Positive | colony formation of cells            | 6.46E-09 | 199 |
|          | Corn   |          |                                      |          |     |
| Duodenum | stover | Positive | replication of RNA virus             | 6.93E-09 | 204 |
|          | Corn   |          |                                      |          |     |
| Duodenum | stover | Positive | development of blood cells           | 8.75E-09 | 256 |
|          | Corn   |          |                                      |          |     |
| Duodenum | stover | Positive | morphology of connective tissue      | 9.41E-09 | 187 |
|          | Corn   |          |                                      |          |     |
| Duodenum | stover | Positive | formation of filaments               | 9.49E-09 | 164 |
|          | Corn   |          |                                      |          |     |
| Duodenum | stover | Positive | invasion of tumor cell lines         | 1.08E-08 | 260 |
|          | Corn   |          |                                      |          |     |
| Duodenum | stover | Positive | infection by Retroviridae            | 1.08E-08 | 279 |
|          | Corn   |          |                                      |          |     |
| Duodenum | stover | Positive | seizure disorder                     | 1.13E-08 | 190 |
|          | Corn   |          |                                      |          |     |
| Duodenum | stover | Positive | colony formation                     | 2.03E-08 | 213 |
|          | Corn   |          |                                      |          |     |
| Duodenum | stover | Positive | growth of lesion                     | 2.03E-08 | 305 |
|          | Corn   |          |                                      |          |     |
| Duodenum | stover | Positive | abnormal morphology of head          | 2.12E-08 | 317 |
| Duodenum | Corn   | Positive | development of body axis             | 2.15E-08 | 392 |

|          |        |          |                                      |          |     |
|----------|--------|----------|--------------------------------------|----------|-----|
|          | stover |          |                                      |          |     |
|          | Corn   |          |                                      |          |     |
| Duodenum | stover | Positive | epileptic seizure                    | 2.19E-08 | 77  |
|          | Corn   |          |                                      |          |     |
| Duodenum | stover | Positive | differentiation of connective tissue | 2.34E-08 | 281 |
|          | Corn   |          |                                      |          |     |
| Duodenum | stover | Positive | development of abdomen               | 2.36E-08 | 228 |
|          | Corn   |          |                                      |          |     |
| Duodenum | stover | Positive | growth of tumor                      | 2.45E-08 | 304 |
|          | Corn   |          |                                      |          |     |
| Duodenum | stover | Positive | apoptosis of connective tissue cells | 2.45E-08 | 125 |
|          | Corn   |          |                                      |          |     |
| Duodenum | stover | Positive | proliferation of fibroblasts         | 2.49E-08 | 146 |
|          | Corn   |          |                                      |          |     |
| Duodenum | stover | Positive | Organ Degeneration                   | 2.49E-08 | 197 |
|          | Corn   |          |                                      |          |     |
| Duodenum | stover | Positive | cell death of epithelial cell lines  | 2.51E-08 | 120 |
|          | Corn   |          |                                      |          |     |
| Duodenum | stover | Positive | quantity of leukocytes               | 2.56E-08 | 345 |
|          | Corn   |          |                                      |          |     |
| Duodenum | stover | Positive | necrosis of epithelial tissue        | 2.56E-08 | 231 |
|          | Corn   |          |                                      |          |     |
| Duodenum | stover | Positive | differentiation of tumor cell lines  | 3.44E-08 | 155 |
|          | Corn   |          |                                      |          |     |
| Duodenum | stover | Positive | morphology of muscle                 | 3.59E-08 | 139 |
|          | Corn   |          |                                      |          |     |
| Duodenum | stover | Positive | metabolism of monosaccharide         | 4.15E-08 | 59  |
|          | Corn   |          |                                      |          |     |
| Duodenum | stover | Positive | infection by RNA virus               | 4.25E-08 | 327 |
|          | Corn   |          |                                      |          |     |
| Duodenum | stover | Positive | infection by lentivirus              | 4.64E-08 | 274 |
|          | Corn   |          |                                      |          |     |
| Duodenum | stover | Positive | concentration of fatty acid          | 4.72E-08 | 118 |
|          | Corn   |          |                                      |          |     |
| Duodenum | stover | Positive | replication of virus                 | 4.72E-08 | 220 |
|          | Corn   |          |                                      |          |     |
| Duodenum | stover | Positive | degeneration of neurons              | 4.72E-08 | 103 |
|          | Corn   |          |                                      |          |     |
| Duodenum | stover | Positive | morphology of vessel                 | 4.91E-08 | 128 |
|          | Corn   |          |                                      |          |     |
| Duodenum | stover | Positive | uptake of carbohydrate               | 4.98E-08 | 122 |
|          | Corn   |          |                                      |          |     |
| Duodenum | stover | Positive | HIV infection                        | 5.05E-08 | 273 |
| Duodenum | Corn   | Positive | growth of muscle tissue              | 5.74E-08 | 152 |

|          |        |          |                                              |          |     |
|----------|--------|----------|----------------------------------------------|----------|-----|
|          | stover |          |                                              |          |     |
|          | Corn   |          |                                              |          |     |
| Duodenum | stover | Positive | growth of embryonic tissue                   | 5.92E-08 | 116 |
|          | Corn   |          |                                              |          |     |
| Duodenum | stover | Positive | proliferation of muscle cells                | 6.51E-08 | 151 |
|          | Corn   |          |                                              |          |     |
| Duodenum | stover | Positive | cell death of muscle cells                   | 6.57E-08 | 138 |
|          | Corn   |          |                                              |          |     |
| Duodenum | stover | Positive | infection of cells                           | 6.57E-08 | 302 |
|          | Corn   |          |                                              |          |     |
| Duodenum | stover | Positive | development of leukocytes                    | 6.58E-08 | 229 |
|          | Corn   |          |                                              |          |     |
| Duodenum | stover | Positive | differentiation of connective tissue cells   | 6.79E-08 | 248 |
|          | Corn   |          |                                              |          |     |
| Duodenum | stover | Positive | mitosis                                      | 6.84E-08 | 196 |
|          | Corn   |          |                                              |          |     |
| Duodenum | stover | Positive | cellular degradation                         | 6.98E-08 | 108 |
|          | Corn   |          |                                              |          |     |
| Duodenum | stover | Positive | survival of organism                         | 7.01E-08 | 269 |
|          | Corn   |          |                                              |          |     |
| Duodenum | stover | Positive | function of blood cells                      | 7.26E-08 | 228 |
|          | Corn   |          |                                              |          |     |
| Duodenum | stover | Positive | quantity of lymphocytes                      | 8.66E-08 | 270 |
|          | Corn   |          |                                              |          |     |
| Duodenum | stover | Positive | development of head                          | 9.03E-08 | 364 |
|          | Corn   |          |                                              |          |     |
| Duodenum | stover | Positive | function of leukocytes                       | 9.36E-08 | 210 |
|          | Corn   |          |                                              |          |     |
| Duodenum | stover | Positive | uptake of monosaccharide                     | 1.01E-07 | 113 |
|          | Corn   |          |                                              |          |     |
| Duodenum | stover | Positive | quantity of carbohydrate                     | 1.04E-07 | 203 |
|          | Corn   |          |                                              |          |     |
| Duodenum | stover | Positive | neuritogenesis                               | 1.04E-07 | 226 |
|          | Corn   |          |                                              |          |     |
| Duodenum | stover | Positive | autosomal recessive disease                  | 1.12E-07 | 343 |
|          | Corn   |          |                                              |          |     |
| Duodenum | stover | Positive | outgrowth of plasma membrane projections     | 1.14E-07 | 163 |
|          | Corn   |          |                                              |          |     |
| Duodenum | stover | Positive | development of neurons                       | 1.28E-07 | 295 |
|          | Corn   |          |                                              |          |     |
| Duodenum | stover | Positive | congenital anomaly of musculoskeletal system | 1.30E-07 | 279 |
|          | Corn   |          |                                              |          |     |
| Duodenum | stover | Positive | cell transformation                          | 1.31E-07 | 182 |
| Duodenum | Corn   | Positive | cell death of muscle                         | 1.31E-07 | 140 |



|          |        |          |                                                    |          |     |
|----------|--------|----------|----------------------------------------------------|----------|-----|
|          | stover |          |                                                    |          |     |
|          | Corn   |          |                                                    |          |     |
| Duodenum | stover | Positive | growth of plasma membrane projections              | 1.33E-07 | 184 |
|          | Corn   |          |                                                    |          |     |
| Duodenum | stover | Positive | morphology of bone                                 | 1.43E-07 | 178 |
|          | Corn   |          |                                                    |          |     |
| Duodenum | stover | Positive | secretion of molecule                              | 1.49E-07 | 214 |
|          | Corn   |          |                                                    |          |     |
| Duodenum | stover | Positive | long-term potentiation                             | 1.52E-07 | 103 |
|          | Corn   |          |                                                    |          |     |
| Duodenum | stover | Positive | necrosis of muscle                                 | 1.75E-07 | 139 |
|          | Corn   |          |                                                    |          |     |
| Duodenum | stover | Positive | morphology of blood vessel                         | 1.83E-07 | 117 |
|          | Corn   |          |                                                    |          |     |
| Duodenum | stover | Positive | learning                                           | 1.83E-07 | 166 |
|          | Corn   |          |                                                    |          |     |
| Duodenum | stover | Positive | metabolism of nucleic acid component or derivative | 1.89E-07 | 202 |
|          | Corn   |          |                                                    |          |     |
| Duodenum | stover | Positive | outgrowth of neurites                              | 1.93E-07 | 161 |
|          | Corn   |          |                                                    |          |     |
| Duodenum | stover | Positive | cell movement of smooth muscle cells               | 2.05E-07 | 72  |
|          | Corn   |          |                                                    |          |     |
| Duodenum | stover | Positive | abnormal morphology of embryonic tissue            | 2.12E-07 | 212 |
|          | Corn   |          |                                                    |          |     |
| Duodenum | stover | Positive | cell death of fibroblast cell lines                | 2.18E-07 | 169 |
|          | Corn   |          |                                                    |          |     |
| Duodenum | stover | Positive | formation of plasma membrane projections           | 2.24E-07 | 229 |
|          | Corn   |          |                                                    |          |     |
| Duodenum | stover | Positive | synthesis of lipid                                 | 2.35E-07 | 270 |
|          | Corn   |          |                                                    |          |     |
| Duodenum | stover | Positive | formation of muscle                                | 2.41E-07 | 158 |
|          | Corn   |          |                                                    |          |     |
| Duodenum | stover | Positive | growth of neurites                                 | 2.85E-07 | 181 |
|          | Corn   |          |                                                    |          |     |
| Duodenum | stover | Positive | mass of organism                                   | 2.85E-07 | 135 |
|          | Corn   |          |                                                    |          |     |
| Duodenum | stover | Positive | development of genitourinary system                | 2.89E-07 | 329 |
|          | Corn   |          |                                                    |          |     |
| Duodenum | stover | Positive | cognition                                          | 3.16E-07 | 178 |
|          | Corn   |          |                                                    |          |     |
| Duodenum | stover | Positive | accumulation of lipid                              | 3.31E-07 | 122 |
|          | Corn   |          |                                                    |          |     |
| Duodenum | stover | Positive | cell death of epithelial cells                     | 3.41E-07 | 193 |
| Duodenum | Corn   | Positive | activation of cells                                | 3.50E-07 | 359 |

|          |        |          |                                            |          |     |
|----------|--------|----------|--------------------------------------------|----------|-----|
|          | stover |          |                                            |          |     |
|          | Corn   |          |                                            |          |     |
| Duodenum | stover | Positive | quantity of mononuclear leukocytes         | 3.98E-07 | 276 |
|          | Corn   |          |                                            |          |     |
| Duodenum | stover | Positive | cell death of heart cells                  | 4.10E-07 | 93  |
|          | Corn   |          |                                            |          |     |
| Duodenum | stover | Positive | development of mononuclear leukocytes      | 4.26E-07 | 214 |
|          | Corn   |          |                                            |          |     |
| Duodenum | stover | Positive | quantity of T lymphocytes                  | 4.35E-07 | 206 |
|          | Corn   |          |                                            |          |     |
| Duodenum | stover | Positive | abnormal morphology of abdomen             | 4.53E-07 | 324 |
|          | Corn   |          |                                            |          |     |
| Duodenum | stover | Positive | apoptosis of muscle                        | 4.58E-07 | 108 |
|          | Corn   |          |                                            |          |     |
| Duodenum | stover | Positive | morphology of respiratory system           | 4.58E-07 | 126 |
|          | Corn   |          |                                            |          |     |
| Duodenum | stover | Positive | cell death of fibroblasts                  | 4.84E-07 | 109 |
|          | Corn   |          |                                            |          |     |
| Duodenum | stover | Positive | development of lymphocytes                 | 5.38E-07 | 212 |
|          | Corn   |          |                                            |          |     |
| Duodenum | stover | Positive | proliferation of fibroblast cell lines     | 5.43E-07 | 166 |
|          | Corn   |          |                                            |          |     |
| Duodenum | stover | Positive | abnormal morphology of respiratory system  | 5.93E-07 | 124 |
|          | Corn   |          |                                            |          |     |
| Duodenum | stover | Positive | migration of smooth muscle cells           | 6.10E-07 | 66  |
|          | Corn   |          |                                            |          |     |
| Duodenum | stover | Positive | cardiogenesis                              | 6.10E-07 | 183 |
|          | Corn   |          |                                            |          |     |
| Duodenum | stover | Positive | cell movement of muscle cells              | 6.10E-07 | 78  |
|          | Corn   |          |                                            |          |     |
| Duodenum | stover | Positive | apoptosis of muscle cells                  | 6.15E-07 | 107 |
|          | Corn   |          |                                            |          |     |
| Duodenum | stover | Positive | abnormal morphology of reproductive system | 6.16E-07 | 196 |
|          | Corn   |          |                                            |          |     |
| Duodenum | stover | Positive | homing of cells                            | 6.62E-07 | 213 |
|          | Corn   |          |                                            |          |     |
| Duodenum | stover | Positive | morphology of reproductive system          | 6.83E-07 | 205 |
|          | Corn   |          |                                            |          |     |
| Duodenum | stover | Positive | outgrowth of cells                         | 7.20E-07 | 169 |
|          | Corn   |          |                                            |          |     |
| Duodenum | stover | Positive | infection by HIV-1                         | 7.21E-07 | 231 |
|          | Corn   |          |                                            |          |     |
| Duodenum | stover | Positive | vascularization                            | 7.21E-07 | 98  |
| Duodenum | Corn   | Positive | peripheral vascular disease                | 7.36E-07 | 150 |

|          |        |          |                                              |          |     |
|----------|--------|----------|----------------------------------------------|----------|-----|
|          | stover |          |                                              |          |     |
|          | Corn   |          |                                              |          |     |
| Duodenum | stover | Positive | development of digestive system              | 7.46E-07 | 151 |
|          | Corn   |          |                                              |          |     |
| Duodenum | stover | Positive | development of cardiovascular tissue         | 7.87E-07 | 146 |
|          | Corn   |          |                                              |          |     |
| Duodenum | stover | Positive | dysgenesis                                   | 8.49E-07 | 206 |
|          | Corn   |          |                                              |          |     |
| Duodenum | stover | Positive | apoptosis of fibroblast cell lines           | 8.56E-07 | 131 |
|          | Corn   |          |                                              |          |     |
| Duodenum | stover | Positive | apoptosis of fibroblasts                     | 9.31E-07 | 91  |
|          | Corn   |          |                                              |          |     |
| Duodenum | stover | Positive | formation of actin stress fibers             | 9.31E-07 | 99  |
|          | Corn   |          |                                              |          |     |
| Duodenum | stover | Positive | differentiation of leukocytes                | 9.57E-07 | 252 |
|          | Corn   |          |                                              |          |     |
| Duodenum | stover | Positive | abnormal morphology of epithelial tissue     | 9.99E-07 | 163 |
|          | Corn   |          |                                              |          |     |
| Duodenum | stover | Positive | cell viability of cervical cancer cell lines | 9.99E-07 | 92  |
|          | Corn   |          |                                              |          |     |
| Duodenum | stover | Positive | metabolism of nucleotide                     | 1.05E-06 | 170 |
|          | Corn   |          |                                              |          |     |
| Duodenum | stover | Positive | abnormal morphology of blood vessel          | 1.09E-06 | 108 |
|          | Corn   |          |                                              |          |     |
| Duodenum | stover | Positive | synthesis of carbohydrate                    | 1.16E-06 | 165 |
|          | Corn   |          |                                              |          |     |
| Duodenum | stover | Positive | cell death of sarcoma cell lines             | 1.16E-06 | 94  |
|          | Corn   |          |                                              |          |     |
| Duodenum | stover | Positive | abnormal morphology of bone                  | 1.18E-06 | 169 |
|          | Corn   |          |                                              |          |     |
| Duodenum | stover | Positive | formation of cells                           | 1.20E-06 | 357 |
|          | Corn   |          |                                              |          |     |
| Duodenum | stover | Positive | proliferation of hematopoietic cells         | 1.25E-06 | 104 |
|          | Corn   |          |                                              |          |     |
| Duodenum | stover | Positive | function of cardiovascular system            | 1.36E-06 | 145 |
|          | Corn   |          |                                              |          |     |
| Duodenum | stover | Positive | homing                                       | 1.37E-06 | 217 |
|          | Corn   |          |                                              |          |     |
| Duodenum | stover | Positive | cell death of heart                          | 1.40E-06 | 94  |
|          | Corn   |          |                                              |          |     |
| Duodenum | stover | Positive | expression of protein                        | 1.44E-06 | 134 |
|          | Corn   |          |                                              |          |     |
| Duodenum | stover | Positive | apoptosis of heart cells                     | 1.45E-06 | 80  |
| Duodenum | Corn   | Positive | cell death of cervical cancer cell lines     | 1.58E-06 | 138 |

|          |        |          |                                        |          |     |
|----------|--------|----------|----------------------------------------|----------|-----|
|          | stover |          |                                        |          |     |
|          | Corn   |          |                                        |          |     |
| Duodenum | stover | Positive | migration of muscle cells              | 1.58E-06 | 71  |
|          | Corn   |          |                                        |          |     |
| Duodenum | stover | Positive | morphology of muscle cells             | 1.58E-06 | 71  |
|          | Corn   |          |                                        |          |     |
| Duodenum | stover | Positive | morphology of heart ventricle          | 1.58E-06 | 81  |
|          | Corn   |          |                                        |          |     |
| Duodenum | stover | Positive | peripheral arterial disease            | 1.58E-06 | 88  |
|          | Corn   |          |                                        |          |     |
| Duodenum | stover | Positive | endothelial cell development           | 1.58E-06 | 139 |
|          | Corn   |          |                                        |          |     |
| Duodenum | stover | Positive | development of lymphatic system        | 1.61E-06 | 140 |
|          | Corn   |          |                                        |          |     |
| Duodenum | stover | Positive | Bleeding                               | 1.64E-06 | 164 |
|          | Corn   |          |                                        |          |     |
| Duodenum | stover | Positive | cell movement of leukocytes            | 1.65E-06 | 283 |
|          | Corn   |          |                                        |          |     |
| Duodenum | stover | Positive | differentiation of blood cells         | 1.75E-06 | 309 |
|          | Corn   |          |                                        |          |     |
| Duodenum | stover | Positive | growth of skin                         | 1.83E-06 | 90  |
|          | Corn   |          |                                        |          |     |
| Duodenum | stover | Positive | activation of enzyme                   | 1.90E-06 | 151 |
|          | Corn   |          |                                        |          |     |
| Duodenum | stover | Positive | synthesis of nucleotide                | 1.91E-06 | 142 |
|          | Corn   |          |                                        |          |     |
| Duodenum | stover | Positive | development of endothelial tissue      | 1.94E-06 | 143 |
|          | Corn   |          |                                        |          |     |
| Duodenum | stover | Positive | cell movement of myeloid cells         | 2.28E-06 | 204 |
|          | Corn   |          |                                        |          |     |
| Duodenum | stover | Positive | proliferation of smooth muscle cells   | 2.30E-06 | 114 |
|          | Corn   |          |                                        |          |     |
| Duodenum | stover | Positive | homeostasis of leukocytes              | 2.46E-06 | 209 |
|          | Corn   |          |                                        |          |     |
| Duodenum | stover | Positive | synthesis of protein                   | 2.48E-06 | 171 |
|          | Corn   |          |                                        |          |     |
| Duodenum | stover | Positive | morphology of cardiac muscle           | 2.51E-06 | 71  |
|          | Corn   |          |                                        |          |     |
| Duodenum | stover | Positive | morphology of skin                     | 2.62E-06 | 109 |
|          | Corn   |          |                                        |          |     |
| Duodenum | stover | Positive | secretory pathway                      | 2.62E-06 | 82  |
|          | Corn   |          |                                        |          |     |
| Duodenum | stover | Positive | abnormal morphology of heart ventricle | 2.83E-06 | 74  |
| Duodenum | Corn   | Positive | cell death of cardiomyocytes           | 2.85E-06 | 88  |

|          |        |          |                                                 |          |     |
|----------|--------|----------|-------------------------------------------------|----------|-----|
|          | stover |          |                                                 |          |     |
|          | Corn   |          |                                                 |          |     |
| Duodenum | stover | Positive | export of molecule                              | 3.00E-06 | 117 |
|          | Corn   |          |                                                 |          |     |
| Duodenum | stover | Positive | Hypoplasia                                      | 3.05E-06 | 191 |
|          | Corn   |          |                                                 |          |     |
| Duodenum | stover | Positive | Hypertrophy                                     | 3.15E-06 | 180 |
|          | Corn   |          |                                                 |          |     |
| Duodenum | stover | Positive | advanced malignant tumor                        | 3.25E-06 | 308 |
|          | Corn   |          |                                                 |          |     |
| Duodenum | stover | Positive | growth of lymphatic system component            | 3.32E-06 | 80  |
|          | Corn   |          |                                                 |          |     |
| Duodenum | stover | Positive | autophagy                                       | 3.48E-06 | 145 |
|          | Corn   |          |                                                 |          |     |
| Duodenum | stover | Positive | quantity of lymphatic system component          | 3.51E-06 | 146 |
|          | Corn   |          |                                                 |          |     |
| Duodenum | stover | Positive | sprouting                                       | 3.62E-06 | 149 |
|          | Corn   |          |                                                 |          |     |
| Duodenum | stover | Positive | proliferation of hematopoietic progenitor cells | 3.65E-06 | 98  |
|          | Corn   |          |                                                 |          |     |
| Duodenum | stover | Positive | differentiation of embryonic tissue             | 3.75E-06 | 102 |
|          | Corn   |          |                                                 |          |     |
| Duodenum | stover | Positive | cell spreading                                  | 3.75E-06 | 110 |
|          | Corn   |          |                                                 |          |     |
| Duodenum | stover | Positive | apoptosis of cardiomyocytes                     | 3.79E-06 | 77  |
|          | Corn   |          |                                                 |          |     |
| Duodenum | stover | Positive | apoptosis of epithelial cell lines              | 4.20E-06 | 91  |
|          | Corn   |          |                                                 |          |     |
| Duodenum | stover | Positive | abnormal morphology of muscle                   | 4.21E-06 | 124 |
|          | Corn   |          |                                                 |          |     |
| Duodenum | stover | Positive | proliferation of epithelial cells               | 4.34E-06 | 186 |
|          | Corn   |          |                                                 |          |     |
| Duodenum | stover | Positive | formation of eye                                | 4.48E-06 | 167 |
|          | Corn   |          |                                                 |          |     |
| Duodenum | stover | Positive | cell death of tumor                             | 4.60E-06 | 147 |
|          | Corn   |          |                                                 |          |     |
| Duodenum | stover | Positive | Lymphocyte homeostasis                          | 4.80E-06 | 204 |
|          | Corn   |          |                                                 |          |     |
| Duodenum | stover | Positive | cell death of cortical neurons                  | 4.87E-06 | 73  |
|          | Corn   |          |                                                 |          |     |
| Duodenum | stover | Positive | cell movement of breast cancer cell lines       | 5.05E-06 | 114 |
|          | Corn   |          |                                                 |          |     |
| Duodenum | stover | Positive | cartilage development                           | 5.11E-06 | 62  |
| Duodenum | Corn   | Positive | development of lymphatic system component       | 5.26E-06 | 121 |

|          |                |          |                                           |          |     |
|----------|----------------|----------|-------------------------------------------|----------|-----|
|          | stover<br>Corn |          |                                           |          |     |
| Duodenum | stover<br>Corn | Positive | T cell development                        | 5.32E-06 | 189 |
| Duodenum | stover<br>Corn | Positive | interphase                                | 5.50E-06 | 242 |
| Duodenum | stover<br>Corn | Positive | synthesis of reactive oxygen species      | 5.51E-06 | 181 |
| Duodenum | stover<br>Corn | Positive | phosphorylation of protein                | 5.57E-06 | 269 |
| Duodenum | stover<br>Corn | Positive | organization of actin cytoskeleton        | 5.60E-06 | 118 |
| Duodenum | stover<br>Corn | Positive | necrosis of tumor                         | 5.86E-06 | 146 |
| Duodenum | stover<br>Corn | Positive | G1 phase                                  | 5.99E-06 | 149 |
| Duodenum | stover<br>Corn | Positive | proliferation of blood cells              | 6.02E-06 | 305 |
| Duodenum | stover<br>Corn | Positive | development of sensory organ              | 6.09E-06 | 210 |
| Duodenum | stover<br>Corn | Positive | quantity of interleukin                   | 6.18E-06 | 60  |
| Duodenum | stover<br>Corn | Positive | binding of DNA                            | 6.26E-06 | 195 |
| Duodenum | stover<br>Corn | Positive | Edema                                     | 6.55E-06 | 133 |
| Duodenum | stover<br>Corn | Positive | quantity of IL-6 in blood                 | 6.57E-06 | 40  |
| Duodenum | stover<br>Corn | Positive | formation of actin filaments              | 6.60E-06 | 119 |
| Duodenum | stover<br>Corn | Positive | abnormal morphology of internal genitalia | 6.69E-06 | 135 |
| Duodenum | stover<br>Corn | Positive | abnormal morphology of left ventricle     | 6.71E-06 | 39  |
| Duodenum | stover<br>Corn | Positive | quantity of lymphoid organ                | 6.71E-06 | 120 |
| Duodenum | stover<br>Corn | Positive | engulfment of cells                       | 6.86E-06 | 155 |
| Duodenum | stover<br>Corn | Positive | dephosphorylation of protein              | 6.86E-06 | 77  |
| Duodenum | stover<br>Corn | Positive | muscle tumor                              | 6.93E-06 | 139 |
| Duodenum | stover         | Positive | morphology of genital organ               | 6.93E-06 | 161 |
| Duodenum | Corn           | Positive | migration of breast cancer cell lines     | 7.00E-06 | 98  |

|          |        |          |                                               |          |     |
|----------|--------|----------|-----------------------------------------------|----------|-----|
|          | stover |          |                                               |          |     |
|          | Corn   |          |                                               |          |     |
| Duodenum | stover | Positive | proliferation of embryonic cells              | 7.33E-06 | 99  |
|          | Corn   |          |                                               |          |     |
| Duodenum | stover | Positive | differentiation of muscle                     | 7.33E-06 | 118 |
|          | Corn   |          |                                               |          |     |
| Duodenum | stover | Positive | metabolism of reactive oxygen species         | 8.10E-06 | 187 |
|          | Corn   |          |                                               |          |     |
| Duodenum | stover | Positive | cell movement of blood cells                  | 8.43E-06 | 315 |
|          | Corn   |          |                                               |          |     |
| Duodenum | stover | Positive | replication of Influenza virus                | 8.79E-06 | 113 |
|          | Corn   |          |                                               |          |     |
| Duodenum | stover | Positive | benign neoplasm of female genital organ       | 8.86E-06 | 161 |
|          | Corn   |          |                                               |          |     |
| Duodenum | stover | Positive | targeting of protein                          | 9.01E-06 | 56  |
|          | Corn   |          |                                               |          |     |
| Duodenum | stover | Positive | cell movement of vascular smooth muscle cells | 9.01E-06 | 50  |
|          | Corn   |          |                                               |          |     |
| Duodenum | stover | Positive | production of reactive oxygen species         | 9.09E-06 | 140 |
|          | Corn   |          |                                               |          |     |
| Duodenum | stover | Positive | morphology of left ventricle                  | 9.12E-06 | 40  |
|          | Corn   |          |                                               |          |     |
| Duodenum | stover | Positive | quantity of thymus gland                      | 9.18E-06 | 93  |
|          | Corn   |          |                                               |          |     |
| Duodenum | stover | Positive | migration of blood cells                      | 9.18E-06 | 314 |
|          | Corn   |          |                                               |          |     |
| Duodenum | stover | Positive | damage of nervous system                      | 9.32E-06 | 90  |
|          | Corn   |          |                                               |          |     |
| Duodenum | stover | Positive | replication of Influenza A virus              | 9.81E-06 | 112 |
|          | Corn   |          |                                               |          |     |
| Duodenum | stover | Positive | chemotaxis of cells                           | 1.03E-05 | 196 |
|          | Corn   |          |                                               |          |     |
| Duodenum | stover | Positive | homo-oligomerization of protein               | 1.04E-05 | 57  |
|          | Corn   |          |                                               |          |     |
| Duodenum | stover | Positive | morphology of central nervous system          | 1.07E-05 | 191 |
|          | Corn   |          |                                               |          |     |
| Duodenum | stover | Positive | quantity of protein in blood                  | 1.09E-05 | 189 |
|          | Corn   |          |                                               |          |     |
| Duodenum | stover | Positive | leukocyte migration                           | 1.10E-05 | 313 |
|          | Corn   |          |                                               |          |     |
| Duodenum | stover | Positive | Oral Cancer and Tumors                        | 1.18E-05 | 91  |
|          | Corn   |          |                                               |          |     |
| Duodenum | stover | Positive | uptake of D-hexose                            | 1.27E-05 | 89  |
| Duodenum | Corn   | Positive | atrophy of muscle                             | 1.28E-05 | 62  |

|          |        |          |                                           |          |      |
|----------|--------|----------|-------------------------------------------|----------|------|
|          | stover |          |                                           |          |      |
|          | Corn   |          |                                           |          |      |
| Duodenum | stover | Positive | transmembrane potential of mitochondria   | 1.28E-05 | 86   |
|          | Corn   |          |                                           |          |      |
| Duodenum | stover | Positive | morphology of cardiovascular tissue       | 1.28E-05 | 40   |
|          | Corn   |          |                                           |          |      |
| Duodenum | stover | Positive | gliosis of brain                          | 1.28E-05 | 22   |
|          | Corn   |          |                                           |          |      |
| Duodenum | stover | Positive | adenocarcinoma                            | 1.28E-05 | 2109 |
|          | Corn   |          |                                           |          |      |
| Duodenum | stover | Positive | development of urinary tract              | 1.28E-05 | 111  |
|          | Corn   |          |                                           |          |      |
| Duodenum | stover | Positive | memory                                    | 1.28E-05 | 101  |
|          | Corn   |          |                                           |          |      |
| Duodenum | stover | Positive | differentiation of epithelial tissue      | 1.28E-05 | 137  |
|          | Corn   |          |                                           |          |      |
| Duodenum | stover | Positive | arthritis                                 | 1.37E-05 | 334  |
|          | Corn   |          |                                           |          |      |
| Duodenum | stover | Positive | release of L-amino acid                   | 1.37E-05 | 38   |
|          | Corn   |          |                                           |          |      |
| Duodenum | stover | Positive | autosomal dominant disease                | 1.38E-05 | 233  |
|          | Corn   |          |                                           |          |      |
| Duodenum | stover | Positive | contractility of heart                    | 1.49E-05 | 72   |
|          | Corn   |          |                                           |          |      |
| Duodenum | stover | Positive | biosynthesis of nucleoside triphosphate   | 1.50E-05 | 47   |
|          | Corn   |          |                                           |          |      |
| Duodenum | stover | Positive | cell death of tumor cells                 | 1.50E-05 | 141  |
|          | Corn   |          |                                           |          |      |
| Duodenum | stover | Positive | arthropathy                               | 1.52E-05 | 339  |
|          | Corn   |          |                                           |          |      |
| Duodenum | stover | Positive | migration of carcinoma cell lines         | 1.52E-05 | 70   |
|          | Corn   |          |                                           |          |      |
| Duodenum | stover | Positive | oral cancer                               | 1.56E-05 | 90   |
|          | Corn   |          |                                           |          |      |
| Duodenum | stover | Positive | cell death of neuroblastoma cell lines    | 1.59E-05 | 78   |
|          | Corn   |          |                                           |          |      |
| Duodenum | stover | Positive | occlusion of blood vessel                 | 1.59E-05 | 179  |
|          | Corn   |          |                                           |          |      |
| Duodenum | stover | Positive | chemotaxis                                | 1.59E-05 | 201  |
|          | Corn   |          |                                           |          |      |
| Duodenum | stover | Positive | T cell homeostasis                        | 1.59E-05 | 191  |
|          | Corn   |          |                                           |          |      |
| Duodenum | stover | Positive | migration of vascular smooth muscle cells | 1.60E-05 | 46   |
| Duodenum | Corn   | Positive | formation of lung                         | 1.63E-05 | 116  |



|          |        |          |                                                |          |     |
|----------|--------|----------|------------------------------------------------|----------|-----|
|          | stover |          |                                                |          |     |
|          | Corn   |          |                                                |          |     |
| Duodenum | stover | Positive | cell viability of central nervous system cells | 1.66E-05 | 49  |
|          | Corn   |          |                                                |          |     |
| Duodenum | stover | Positive | dyspnea                                        | 1.66E-05 | 57  |
|          | Corn   |          |                                                |          |     |
| Duodenum | stover | Positive | MAPKKK cascade                                 | 1.69E-05 | 82  |
|          | Corn   |          |                                                |          |     |
| Duodenum | stover | Positive | quantity of hematopoietic progenitor cells     | 1.69E-05 | 165 |
|          | Corn   |          |                                                |          |     |
| Duodenum | stover | Positive | apoptosis of neurons                           | 1.69E-05 | 163 |
|          | Corn   |          |                                                |          |     |
| Duodenum | stover | Positive | transmigration of cells                        | 1.73E-05 | 65  |
|          | Corn   |          |                                                |          |     |
| Duodenum | stover | Positive | vaso-occlusion                                 | 1.75E-05 | 178 |
|          | Corn   |          |                                                |          |     |
| Duodenum | stover | Positive | proliferation of dermal cells                  | 1.77E-05 | 72  |
|          | Corn   |          |                                                |          |     |
| Duodenum | stover | Positive | differentiation of muscle cells                | 1.85E-05 | 109 |
|          | Corn   |          |                                                |          |     |
| Duodenum | stover | Positive | cell movement of phagocytes                    | 1.88E-05 | 202 |
|          | Corn   |          |                                                |          |     |
| Duodenum | stover | Positive | morphology of endothelial tissue               | 1.88E-05 | 38  |
|          | Corn   |          |                                                |          |     |
| Duodenum | stover | Positive | quantity of thymocytes                         | 1.88E-05 | 91  |
|          | Corn   |          |                                                |          |     |
| Duodenum | stover | Positive | morphogenesis of neurons                       | 1.90E-05 | 159 |
|          | Corn   |          |                                                |          |     |
| Duodenum | stover | Positive | epilepsy                                       | 1.92E-05 | 118 |
|          | Corn   |          |                                                |          |     |
| Duodenum | stover | Positive | gliosis of central nervous system              | 1.92E-05 | 29  |
|          | Corn   |          |                                                |          |     |
| Duodenum | stover | Positive | metabolism of hexose                           | 1.92E-05 | 47  |
|          | Corn   |          |                                                |          |     |
| Duodenum | stover | Positive | endocytosis                                    | 1.98E-05 | 131 |
|          | Corn   |          |                                                |          |     |
| Duodenum | stover | Positive | cell movement of carcinoma cell lines          | 1.98E-05 | 82  |
|          | Corn   |          |                                                |          |     |
| Duodenum | stover | Positive | cell death of blood cells                      | 2.00E-05 | 251 |
|          | Corn   |          |                                                |          |     |
| Duodenum | stover | Positive | adenoma                                        | 2.02E-05 | 203 |
|          | Corn   |          |                                                |          |     |
| Duodenum | stover | Positive | cell movement of fibroblasts                   | 2.04E-05 | 74  |
| Duodenum | Corn   | Positive | formation of kidney                            | 2.05E-05 | 108 |

|          |        |          |                                            |          |     |
|----------|--------|----------|--------------------------------------------|----------|-----|
|          | stover |          |                                            |          |     |
|          | Corn   |          |                                            |          |     |
| Duodenum | stover | Positive | generation of lymphocytes                  | 2.11E-05 | 59  |
|          | Corn   |          |                                            |          |     |
| Duodenum | stover | Positive | abnormal morphology of genital organ       | 2.12E-05 | 153 |
|          | Corn   |          |                                            |          |     |
| Duodenum | stover | Positive | occlusion of artery                        | 2.15E-05 | 176 |
|          | Corn   |          |                                            |          |     |
| Duodenum | stover | Positive | homeostasis of neurons                     | 2.18E-05 | 11  |
|          | Corn   |          |                                            |          |     |
| Duodenum | stover | Positive | morphology of nerves                       | 2.35E-05 | 58  |
|          | Corn   |          |                                            |          |     |
| Duodenum | stover | Positive | fatty acid metabolism                      | 2.37E-05 | 219 |
|          | Corn   |          |                                            |          |     |
| Duodenum | stover | Positive | activation of Protein kinase               | 2.43E-05 | 98  |
|          | Corn   |          |                                            |          |     |
| Duodenum | stover | Positive | cytostasis                                 | 2.43E-05 | 109 |
|          | Corn   |          |                                            |          |     |
| Duodenum | stover | Positive | hypertrophy of heart                       | 2.47E-05 | 128 |
|          | Corn   |          |                                            |          |     |
| Duodenum | stover | Positive | uptake of D-glucose                        | 2.56E-05 | 87  |
|          | Corn   |          |                                            |          |     |
| Duodenum | stover | Positive | abnormal morphology of skin                | 2.56E-05 | 95  |
|          | Corn   |          |                                            |          |     |
| Duodenum | stover | Positive | cell death of central nervous system cells | 2.58E-05 | 112 |
|          | Corn   |          |                                            |          |     |
| Duodenum | stover | Positive | fertility                                  | 2.62E-05 | 137 |
|          | Corn   |          |                                            |          |     |
| Duodenum | stover | Positive | branching of cells                         | 2.64E-05 | 139 |
|          | Corn   |          |                                            |          |     |
| Duodenum | stover | Positive | muscular hypertrophy                       | 2.65E-05 | 81  |
|          | Corn   |          |                                            |          |     |
| Duodenum | stover | Positive | apoptosis of neuroblastoma cell lines      | 2.66E-05 | 52  |
|          | Corn   |          |                                            |          |     |
| Duodenum | stover | Positive | movement of vascular endothelial cells     | 2.76E-05 | 73  |
|          | Corn   |          |                                            |          |     |
| Duodenum | stover | Positive | maturation of cells                        | 2.78E-05 | 169 |
|          | Corn   |          |                                            |          |     |
| Duodenum | stover | Positive | exocytosis                                 | 2.81E-05 | 76  |
|          | Corn   |          |                                            |          |     |
| Duodenum | stover | Positive | cell death of pheochromocytoma cell lines  | 2.94E-05 | 51  |
|          | Corn   |          |                                            |          |     |
| Duodenum | stover | Positive | morphology of cardiomyocytes               | 2.98E-05 | 41  |
| Duodenum | Corn   | Positive | morphology of skull                        | 3.16E-05 | 88  |

|          |        |          |                                                        |          |     |
|----------|--------|----------|--------------------------------------------------------|----------|-----|
|          | stover |          |                                                        |          |     |
|          | Corn   |          |                                                        |          |     |
| Duodenum | stover | Positive | apoptosis of cervical cancer cell lines                | 3.16E-05 | 108 |
|          | Corn   |          |                                                        |          |     |
| Duodenum | stover | Positive | metabolism of D-glucose                                | 3.18E-05 | 40  |
|          | Corn   |          |                                                        |          |     |
| Duodenum | stover | Positive | quantity of cellular protrusions                       | 3.19E-05 | 65  |
|          | Corn   |          |                                                        |          |     |
| Duodenum | stover | Positive | degeneration of central nervous system                 | 3.19E-05 | 55  |
|          | Corn   |          |                                                        |          |     |
| Duodenum | stover | Positive | length of cells                                        | 3.19E-05 | 44  |
|          | Corn   |          |                                                        |          |     |
| Duodenum | stover | Positive | function of muscle                                     | 3.22E-05 | 131 |
|          | Corn   |          |                                                        |          |     |
| Duodenum | stover | Positive | I-kappaB kinase/NF-kappaB cascade                      | 3.22E-05 | 70  |
|          | Corn   |          |                                                        |          |     |
| Duodenum | stover | Positive | adhesion of tumor cell lines                           | 3.24E-05 | 110 |
|          | Corn   |          |                                                        |          |     |
| Duodenum | stover | Positive | congenital anomaly of cardiovascular system            | 3.24E-05 | 89  |
|          | Corn   |          |                                                        |          |     |
| Duodenum | stover | Positive | congenital malformation of skeleton                    | 3.25E-05 | 157 |
|          | Corn   |          |                                                        |          |     |
| Duodenum | stover | Positive | synthesis of DNA                                       | 3.27E-05 | 155 |
|          | Corn   |          |                                                        |          |     |
| Duodenum | stover | Positive | female genital tract serous cancer                     | 3.32E-05 | 144 |
|          | Corn   |          |                                                        |          |     |
| Duodenum | stover | Positive | abnormal morphology of skull                           | 3.35E-05 | 86  |
|          | Corn   |          |                                                        |          |     |
| Duodenum | stover | Positive | generation of T lymphocytes                            | 3.51E-05 | 49  |
|          | Corn   |          |                                                        |          |     |
| Duodenum | stover | Positive | hypersensitive reaction                                | 3.61E-05 | 159 |
|          | Corn   |          |                                                        |          |     |
| Duodenum | stover | Positive | proliferation of endothelial cells                     | 3.68E-05 | 118 |
|          | Corn   |          |                                                        |          |     |
| Duodenum | stover | Positive | binding of protein binding site                        | 3.73E-05 | 110 |
|          | Corn   |          |                                                        |          |     |
| Duodenum | stover | Positive | cell death of kidney cell lines                        | 4.07E-05 | 115 |
|          | Corn   |          |                                                        |          |     |
| Duodenum | stover | Positive | proliferation of epidermal cells                       | 4.09E-05 | 68  |
|          | Corn   |          |                                                        |          |     |
| Duodenum | stover | Positive | formation of skin                                      | 4.23E-05 | 137 |
|          | Corn   |          |                                                        |          |     |
| Duodenum | stover | Positive | intermediate disease stage peripheral arterial disease | 4.39E-05 | 64  |
| Duodenum | Corn   | Positive | formation of lymphatic system component                | 4.40E-05 | 111 |

|          |        |          |                                          |          |      |
|----------|--------|----------|------------------------------------------|----------|------|
|          | stover |          |                                          |          |      |
|          | Corn   |          |                                          |          |      |
| Duodenum | stover | Positive | cell death of cerebral cortex cells      | 4.52E-05 | 89   |
|          | Corn   |          |                                          |          |      |
| Duodenum | stover | Positive | colony formation of tumor cell lines     | 4.52E-05 | 105  |
|          | Corn   |          |                                          |          |      |
| Duodenum | stover | Positive | invasion of carcinoma cell lines         | 4.52E-05 | 78   |
|          | Corn   |          |                                          |          |      |
| Duodenum | stover | Positive | metastasis                               | 4.54E-05 | 271  |
|          | Corn   |          |                                          |          |      |
| Duodenum | stover | Positive | morphology of lymphatic system component | 4.61E-05 | 154  |
|          | Corn   |          |                                          |          |      |
| Duodenum | stover | Positive | cellular infiltration by leukocytes      | 4.75E-05 | 144  |
|          | Corn   |          |                                          |          |      |
| Duodenum | stover | Positive | abdominal adenocarcinoma                 | 4.79E-05 | 1914 |
|          | Corn   |          | abnormal morphology of central nervous   |          |      |
| Duodenum | stover | Positive | system                                   | 4.79E-05 | 177  |
|          | Corn   |          |                                          |          |      |
| Duodenum | stover | Positive | morphology of digestive system           | 4.80E-05 | 207  |
|          | Corn   |          |                                          |          |      |
| Duodenum | stover | Positive | oral cavity carcinoma                    | 5.10E-05 | 77   |
|          | Corn   |          |                                          |          |      |
| Duodenum | stover | Positive | cell movement of endothelial cells       | 5.31E-05 | 132  |
|          | Corn   |          |                                          |          |      |
| Duodenum | stover | Positive | hypoplasia of organ                      | 5.41E-05 | 164  |
|          | Corn   |          |                                          |          |      |
| Duodenum | stover | Positive | Rheumatic Disease                        | 5.42E-05 | 376  |
|          | Corn   |          |                                          |          |      |
| Duodenum | stover | Positive | degeneration of brain                    | 5.52E-05 | 52   |
|          | Corn   |          |                                          |          |      |
| Duodenum | stover | Positive | invasion of prostate cancer cell lines   | 5.57E-05 | 44   |
|          | Corn   |          |                                          |          |      |
| Duodenum | stover | Positive | connective or soft tissue tumor          | 5.66E-05 | 252  |
|          | Corn   |          |                                          |          |      |
| Duodenum | stover | Positive | apoptosis of pheochromocytoma cell lines | 5.78E-05 | 40   |
|          | Corn   |          |                                          |          |      |
| Duodenum | stover | Positive | growth of brain                          | 5.87E-05 | 49   |
|          | Corn   |          |                                          |          |      |
| Duodenum | stover | Positive | gastrointestinal tract cancer            | 5.90E-05 | 1646 |
|          | Corn   |          |                                          |          |      |
| Duodenum | stover | Positive | differentiation of embryonic cells       | 5.95E-05 | 88   |
|          | Corn   |          |                                          |          |      |
| Duodenum | stover | Positive | skin abnormality                         | 5.95E-05 | 88   |
| Duodenum | Corn   | Positive | smooth muscle tumor                      | 5.95E-05 | 114  |

|          |        |          |                                         |          |      |
|----------|--------|----------|-----------------------------------------|----------|------|
|          | stover |          |                                         |          |      |
|          | Corn   |          |                                         |          |      |
| Duodenum | stover | Positive | cell viability of embryonic cells       | 5.96E-05 | 26   |
|          | Corn   |          |                                         |          |      |
| Duodenum | stover | Positive | morphology of skeleton                  | 6.05E-05 | 106  |
|          | Corn   |          |                                         |          |      |
| Duodenum | stover | Positive | generation of cells                     | 6.19E-05 | 100  |
|          | Corn   |          |                                         |          |      |
| Duodenum | stover | Positive | transmigration of blood cells           | 6.21E-05 | 53   |
|          | Corn   |          |                                         |          |      |
| Duodenum | stover | Positive | contractility of ventricular myocardium | 6.22E-05 | 27   |
|          | Corn   |          |                                         |          |      |
| Duodenum | stover | Positive | metabolism of nucleoside triphosphate   | 6.28E-05 | 57   |
|          | Corn   |          |                                         |          |      |
| Duodenum | stover | Positive | midline defect                          | 6.28E-05 | 101  |
|          | Corn   |          |                                         |          |      |
| Duodenum | stover | Positive | morphogenesis of neurites               | 6.31E-05 | 154  |
|          | Corn   |          |                                         |          |      |
| Duodenum | stover | Positive | bone mineral density                    | 6.36E-05 | 69   |
|          | Corn   |          |                                         |          |      |
| Duodenum | stover | Positive | cell death of brain                     | 6.38E-05 | 110  |
|          | Corn   |          |                                         |          |      |
| Duodenum | stover | Positive | contractility of myocardium             | 6.41E-05 | 29   |
|          | Corn   |          |                                         |          |      |
| Duodenum | stover | Positive | morphology of endothelial cells         | 6.41E-05 | 29   |
|          | Corn   |          |                                         |          |      |
| Duodenum | stover | Positive | gastrointestinal carcinoma              | 6.42E-05 | 1479 |
|          | Corn   |          |                                         |          |      |
| Duodenum | stover | Positive | gliosis of cerebral cortex              | 6.45E-05 | 14   |
|          | Corn   |          |                                         |          |      |
| Duodenum | stover | Positive | abnormal morphology of uterus           | 6.45E-05 | 38   |
|          | Corn   |          |                                         |          |      |
| Duodenum | stover | Positive | abnormal morphology of skeleton         | 6.45E-05 | 103  |
|          | Corn   |          |                                         |          |      |
| Duodenum | stover | Positive | cell death of kidney cells              | 6.50E-05 | 130  |
|          | Corn   |          |                                         |          |      |
| Duodenum | stover | Positive | quantity of cytokine                    | 6.51E-05 | 97   |
|          | Corn   |          |                                         |          |      |
| Duodenum | stover | Positive | feeding                                 | 6.62E-05 | 114  |
|          | Corn   |          |                                         |          |      |
| Duodenum | stover | Positive | function of phagocytes                  | 6.68E-05 | 115  |
|          | Corn   |          |                                         |          |      |
| Duodenum | stover | Positive | morphology of brain                     | 6.75E-05 | 170  |
| Duodenum | Corn   | Positive | cell death of immune cells              | 6.81E-05 | 236  |

|          |                |          |                                          |          |      |
|----------|----------------|----------|------------------------------------------|----------|------|
|          | stover<br>Corn |          |                                          |          |      |
| Duodenum | stover<br>Corn | Positive | relaxation of muscle                     | 6.82E-05 | 37   |
| Duodenum | stover<br>Corn | Positive | metabolism of D-hexose                   | 6.89E-05 | 41   |
| Duodenum | stover<br>Corn | Positive | differentiation of bone                  | 7.00E-05 | 151  |
| Duodenum | stover<br>Corn | Positive | abnormal morphology of body wall         | 7.02E-05 | 44   |
| Duodenum | stover<br>Corn | Positive | hypertrophy of cardiac muscle            | 7.07E-05 | 63   |
| Duodenum | stover<br>Corn | Positive | development of striated muscle           | 7.07E-05 | 71   |
| Duodenum | stover<br>Corn | Positive | development of reproductive system       | 7.14E-05 | 262  |
| Duodenum | stover<br>Corn | Positive | quantity of metal ion                    | 7.17E-05 | 162  |
| Duodenum | stover<br>Corn | Positive | death of perinatal stage organism        | 7.17E-05 | 36   |
| Duodenum | stover<br>Corn | Positive | apoptosis of blood cells                 | 7.29E-05 | 180  |
| Duodenum | stover<br>Corn | Positive | formation of filopodia                   | 7.30E-05 | 66   |
| Duodenum | stover<br>Corn | Positive | Dermatitis                               | 7.31E-05 | 159  |
| Duodenum | stover<br>Corn | Positive | concentration of phospholipid            | 7.46E-05 | 72   |
| Duodenum | stover<br>Corn | Positive | Gastrointestinal Tract Cancer and Tumors | 7.47E-05 | 1670 |
| Duodenum | stover<br>Corn | Positive | release of L-glutamic acid               | 7.53E-05 | 35   |
| Duodenum | stover<br>Corn | Positive | morphology of mouth                      | 7.53E-05 | 55   |
| Duodenum | stover<br>Corn | Positive | infection of tumor cell lines            | 8.31E-05 | 185  |
| Duodenum | stover<br>Corn | Positive | apoptosis of sarcoma cell lines          | 8.39E-05 | 74   |
| Duodenum | stover<br>Corn | Positive | cell death of brain cells                | 8.39E-05 | 103  |
| Duodenum | stover<br>Corn | Positive | growth of lymphoid organ                 | 8.39E-05 | 68   |
| Duodenum | stover         | Positive | stress response of cells                 | 8.41E-05 | 56   |
| Duodenum | Corn           | Positive | homeostasis of ion                       | 8.54E-05 | 91   |

|          |        |          |                                         |          |     |
|----------|--------|----------|-----------------------------------------|----------|-----|
|          | stover |          |                                         |          |     |
|          | Corn   |          |                                         |          |     |
| Duodenum | stover | Positive | differentiation of epithelial cells     | 8.66E-05 | 117 |
|          | Corn   |          |                                         |          |     |
| Duodenum | stover | Positive | migration of vascular endothelial cells | 8.82E-05 | 66  |
|          | Corn   |          |                                         |          |     |
| Duodenum | stover | Positive | cell viability of brain cells           | 9.01E-05 | 41  |
|          | Corn   |          |                                         |          |     |
| Duodenum | stover | Positive | release of amino acids                  | 9.01E-05 | 41  |
|          | Corn   |          |                                         |          |     |
| Duodenum | stover | Positive | abnormal morphology of snout            | 9.05E-05 | 30  |
|          | Corn   |          |                                         |          |     |
| Duodenum | stover | Positive | autophagy of cells                      | 9.05E-05 | 100 |
|          | Corn   |          |                                         |          |     |
| Duodenum | stover | Positive | formation of lymphoid organ             | 9.05E-05 | 100 |
|          | Corn   |          |                                         |          |     |
| Duodenum | stover | Positive | progression of tumor                    | 9.19E-05 | 64  |
|          | Corn   |          |                                         |          |     |
| Duodenum | stover | Positive | abnormal morphology of digestive system | 9.28E-05 | 196 |
|          | Corn   |          |                                         |          |     |
| Duodenum | stover | Positive | vascularization of body region          | 9.34E-05 | 55  |
|          | Corn   |          |                                         |          |     |
| Duodenum | stover | Positive | ion homeostasis of cells                | 9.55E-05 | 200 |
|          | Corn   |          |                                         |          |     |
| Duodenum | stover | Positive | differentiation of bone cells           | 9.60E-05 | 149 |
|          | Corn   |          |                                         |          |     |
| Duodenum | stover | Positive | morphology of uterus                    | 9.72E-05 | 40  |
|          | Corn   |          |                                         |          |     |
| Duodenum | stover | Positive | hypertrophy of tissue                   | 9.79E-05 | 97  |
|          | Corn   |          |                                         |          |     |
| Duodenum | stover | Positive | infection of cervical cancer cell lines | 9.79E-05 | 160 |
|          | Corn   |          |                                         |          |     |
| Duodenum | stover | Positive | biosynthesis of purine ribonucleotide   | 9.80E-05 | 43  |
|          | Corn   |          |                                         |          |     |
| Duodenum | stover | Positive | potentiation of synapse                 | 9.82E-05 | 60  |
|          | Corn   |          |                                         |          |     |
| Duodenum | stover | Positive | morphology of gonad                     | 9.97E-05 | 139 |
|          | Corn   |          |                                         |          |     |
| Duodenum | stover | Positive | G1/S phase transition                   | 9.97E-05 | 82  |
|          | Corn   |          |                                         |          |     |
| Duodenum | stover | Positive | transport of inorganic cation           | 1.01E-04 | 130 |
|          | Corn   |          |                                         |          |     |
| Duodenum | stover | Positive | formation of leukocytes                 | 1.02E-04 | 63  |
| Duodenum | Corn   | Positive | transmigration of leukocytes            | 1.03E-04 | 52  |

|          |                |          |                                      |          |      |
|----------|----------------|----------|--------------------------------------|----------|------|
|          | stover<br>Corn |          |                                      |          |      |
| Duodenum | stover<br>Corn | Positive | proliferation of immune cells        | 1.03E-04 | 279  |
| Duodenum | stover<br>Corn | Positive | neurodegeneration of neurites        | 1.04E-04 | 39   |
| Duodenum | stover<br>Corn | Positive | cell death of bone cancer cell lines | 1.05E-04 | 69   |
| Duodenum | stover<br>Corn | Positive | morphology of testis                 | 1.06E-04 | 102  |
| Duodenum | stover<br>Corn | Positive | generation of leukocytes             | 1.10E-04 | 64   |
| Duodenum | stover<br>Corn | Positive | Cytosis                              | 1.10E-04 | 119  |
| Duodenum | stover<br>Corn | Positive | hepatobiliary system cancer          | 1.11E-04 | 1416 |
| Duodenum | stover<br>Corn | Positive | necrosis of kidney                   | 1.12E-04 | 134  |
| Duodenum | stover<br>Corn | Positive | craniofacial abnormality             | 1.13E-04 | 131  |
| Duodenum | stover<br>Corn | Positive | oxidative stress                     | 1.13E-04 | 33   |
| Duodenum | stover<br>Corn | Positive | leiomyomatosis                       | 1.13E-04 | 107  |
| Duodenum | stover<br>Corn | Positive | checkpoint control                   | 1.14E-04 | 44   |
| Duodenum | stover<br>Corn | Positive | hypertrophy of cells                 | 1.14E-04 | 108  |
| Duodenum | stover<br>Corn | Positive | generation of blood cells            | 1.17E-04 | 65   |
| Duodenum | stover<br>Corn | Negative | malignant solid tumor                | 1.25E-45 | 4008 |
| Duodenum | stover<br>Corn | Negative | cancer                               | 1.25E-45 | 4050 |
| Duodenum | stover<br>Corn | Negative | proliferation of cells               | 9.35E-37 | 1558 |
| Duodenum | stover<br>Corn | Negative | cell death                           | 3.18E-33 | 1411 |
| Duodenum | stover<br>Corn | Negative | organismal death                     | 3.24E-31 | 1052 |
| Duodenum | stover<br>Corn | Negative | morbidity or mortality               | 5.35E-31 | 1063 |
| Duodenum | stover         | Negative | necrosis                             | 2.07E-28 | 1105 |
| Duodenum | Corn           | Negative | tumorigenesis of tissue              | 1.42E-27 | 3365 |



|          |        |          |                                       |          |      |
|----------|--------|----------|---------------------------------------|----------|------|
|          | stover |          |                                       |          |      |
|          | Corn   |          |                                       |          |      |
| Duodenum | stover | Negative | organization of cytoplasm             | 1.97E-27 | 705  |
|          | Corn   |          |                                       |          |      |
| Duodenum | stover | Negative | neoplasia of epithelial tissue        | 6.33E-27 | 3311 |
|          | Corn   |          |                                       |          |      |
| Duodenum | stover | Negative | morphology of cells                   | 9.84E-27 | 861  |
|          | Corn   |          |                                       |          |      |
| Duodenum | stover | Negative | epithelial cancer                     | 2.23E-26 | 3279 |
|          | Corn   |          |                                       |          |      |
| Duodenum | stover | Negative | apoptosis                             | 3.96E-25 | 1114 |
|          | Corn   |          |                                       |          |      |
| Duodenum | stover | Negative | abdominal neoplasm                    | 2.49E-22 | 3260 |
|          | Corn   |          |                                       |          |      |
| Duodenum | stover | Negative | organization of cytoskeleton          | 4.71E-22 | 629  |
|          | Corn   |          |                                       |          |      |
| Duodenum | stover | Negative | cell movement                         | 2.34E-21 | 904  |
|          | Corn   |          |                                       |          |      |
| Duodenum | stover | Negative | abdominal cancer                      | 1.63E-20 | 3213 |
|          | Corn   |          |                                       |          |      |
| Duodenum | stover | Negative | expression of RNA                     | 2.27E-20 | 906  |
|          | Corn   |          |                                       |          |      |
| Duodenum | stover | Negative | transcription                         | 3.93E-19 | 843  |
|          | Corn   |          |                                       |          |      |
| Duodenum | stover | Negative | cell death of tumor cell lines        | 4.10E-19 | 666  |
|          | Corn   |          |                                       |          |      |
| Duodenum | stover | Negative | cell survival                         | 5.29E-18 | 610  |
|          | Corn   |          |                                       |          |      |
| Duodenum | stover | Negative | transcription of RNA                  | 6.97E-18 | 785  |
|          | Corn   |          |                                       |          |      |
| Duodenum | stover | Negative | transport of molecule                 | 9.08E-18 | 692  |
|          | Corn   |          |                                       |          |      |
| Duodenum | stover | Negative | digestive organ tumor                 | 1.06E-17 | 2813 |
|          | Corn   |          |                                       |          |      |
| Duodenum | stover | Negative | microtubule dynamics                  | 1.63E-17 | 527  |
|          | Corn   |          |                                       |          |      |
| Duodenum | stover | Negative | digestive system cancer               | 2.24E-17 | 2786 |
|          | Corn   |          |                                       |          |      |
| Duodenum | stover | Negative | migration of cells                    | 7.58E-17 | 796  |
|          | Corn   |          |                                       |          |      |
| Duodenum | stover | Negative | cell death of connective tissue cells | 1.92E-16 | 290  |
|          | Corn   |          |                                       |          |      |
| Duodenum | stover | Negative | vasculogenesis                        | 2.25E-16 | 345  |
| Duodenum | Corn   | Negative | abnormal morphology of cells          | 2.25E-16 | 553  |

|          |        |          |                                          |          |     |
|----------|--------|----------|------------------------------------------|----------|-----|
|          | stover |          |                                          |          |     |
|          | Corn   |          |                                          |          |     |
| Duodenum | stover | Negative | development of cytoplasm                 | 2.65E-16 | 230 |
|          | Corn   |          |                                          |          |     |
| Duodenum | stover | Negative | angiogenesis                             | 2.84E-16 | 413 |
|          | Corn   |          |                                          |          |     |
| Duodenum | stover | Negative | cell viability                           | 4.17E-16 | 565 |
|          | Corn   |          |                                          |          |     |
| Duodenum | stover | Negative | differentiation of cells                 | 3.87E-15 | 914 |
|          | Corn   |          |                                          |          |     |
| Duodenum | stover | Negative | morphology of cardiovascular system      | 4.92E-15 | 292 |
|          | Corn   |          |                                          |          |     |
| Duodenum | stover | Negative | apoptosis of tumor cell lines            | 1.18E-14 | 524 |
|          | Corn   |          |                                          |          |     |
| Duodenum | stover | Negative | autosomal recessive disease              | 1.19E-14 | 412 |
|          | Corn   |          |                                          |          |     |
| Duodenum | stover | Negative | Movement Disorders                       | 2.70E-14 | 464 |
|          | Corn   |          |                                          |          |     |
| Duodenum | stover | Negative | cell cycle progression                   | 1.48E-13 | 456 |
|          | Corn   |          |                                          |          |     |
| Duodenum | stover | Negative | invasion of cells                        | 2.40E-13 | 386 |
|          | Corn   |          |                                          |          |     |
| Duodenum | stover | Negative | transcription of DNA                     | 4.39E-13 | 638 |
|          | Corn   |          |                                          |          |     |
| Duodenum | stover | Negative | quantity of cells                        | 1.02E-12 | 722 |
|          | Corn   |          |                                          |          |     |
| Duodenum | stover | Negative | Growth Failure                           | 1.81E-12 | 274 |
|          | Corn   |          |                                          |          |     |
| Duodenum | stover | Negative | formation of cytoskeleton                | 1.81E-12 | 182 |
|          | Corn   |          |                                          |          |     |
| Duodenum | stover | Negative | growth of organism                       | 2.85E-12 | 368 |
|          | Corn   |          |                                          |          |     |
| Duodenum | stover | Negative | abnormal morphology of thoracic cavity   | 3.51E-12 | 268 |
|          | Corn   |          |                                          |          |     |
| Duodenum | stover | Negative | growth of connective tissue              | 4.13E-12 | 291 |
|          | Corn   |          |                                          |          |     |
| Duodenum | stover | Negative | size of body                             | 6.77E-12 | 372 |
|          | Corn   |          |                                          |          |     |
| Duodenum | stover | Negative | proliferation of connective tissue cells | 8.79E-12 | 269 |
|          | Corn   |          |                                          |          |     |
| Duodenum | stover | Negative | proliferation of tumor cell lines        | 2.74E-11 | 632 |
|          | Corn   |          |                                          |          |     |
| Duodenum | stover | Negative | formation of cellular protrusions        | 3.16E-11 | 389 |
| Duodenum | Corn   | Negative | organization of organelle                | 3.51E-11 | 245 |

|          |        |          |                                              |          |     |
|----------|--------|----------|----------------------------------------------|----------|-----|
|          | stover |          |                                              |          |     |
|          | Corn   |          |                                              |          |     |
| Duodenum | stover | Negative | morphology of body cavity                    | 4.89E-11 | 499 |
|          | Corn   |          |                                              |          |     |
| Duodenum | stover | Negative | congenital anomaly of musculoskeletal system | 4.89E-11 | 323 |
|          | Corn   |          |                                              |          |     |
| Duodenum | stover | Negative | cell movement of tumor cell lines            | 5.32E-11 | 368 |
|          | Corn   |          |                                              |          |     |
| Duodenum | stover | Negative | cellular homeostasis                         | 5.76E-11 | 620 |
|          | Corn   |          |                                              |          |     |
| Duodenum | stover | Negative | abnormal morphology of cardiovascular system | 7.60E-11 | 255 |
|          | Corn   |          |                                              |          |     |
| Duodenum | stover | Negative | morphology of heart                          | 7.60E-11 | 189 |
|          | Corn   |          |                                              |          |     |
| Duodenum | stover | Negative | development of body trunk                    | 9.21E-11 | 468 |
|          | Corn   |          |                                              |          |     |
| Duodenum | stover | Negative | development of vasculature                   | 9.21E-11 | 194 |
|          | Corn   |          |                                              |          |     |
| Duodenum | stover | Negative | proliferation of fibroblast cell lines       | 9.45E-11 | 196 |
|          | Corn   |          |                                              |          |     |
| Duodenum | stover | Negative | perinatal death                              | 1.10E-10 | 265 |
|          | Corn   |          |                                              |          |     |
| Duodenum | stover | Negative | interphase                                   | 1.57E-10 | 289 |
|          | Corn   |          |                                              |          |     |
| Duodenum | stover | Negative | cell death of fibroblasts                    | 1.93E-10 | 129 |
|          | Corn   |          |                                              |          |     |
| Duodenum | stover | Negative | invasion of tumor cell lines                 | 2.14E-10 | 292 |
|          | Corn   |          |                                              |          |     |
| Duodenum | stover | Negative | formation of cells                           | 2.55E-10 | 415 |
|          | Corn   |          |                                              |          |     |
| Duodenum | stover | Negative | Viral Infection                              | 2.58E-10 | 649 |
|          | Corn   |          |                                              |          |     |
| Duodenum | stover | Negative | disorder of basal ganglia                    | 5.56E-10 | 330 |
|          | Corn   |          |                                              |          |     |
| Duodenum | stover | Negative | fibrogenesis                                 | 6.75E-10 | 188 |
|          | Corn   |          |                                              |          |     |
| Duodenum | stover | Negative | phosphorylation of protein                   | 7.77E-10 | 317 |
|          | Corn   |          |                                              |          |     |
| Duodenum | stover | Negative | abnormal morphology of body cavity           | 8.20E-10 | 472 |
|          | Corn   |          |                                              |          |     |
| Duodenum | stover | Negative | mitosis                                      | 8.30E-10 | 222 |
|          | Corn   |          |                                              |          |     |
| Duodenum | stover | Negative | dyskinesia                                   | 9.12E-10 | 270 |
| Duodenum | Corn   | Negative | epileptic seizure                            | 9.46E-10 | 86  |

|          |        |          |                                          |          |     |
|----------|--------|----------|------------------------------------------|----------|-----|
|          | stover |          |                                          |          |     |
|          | Corn   |          |                                          |          |     |
| Duodenum | stover | Negative | growth of embryo                         | 9.46E-10 | 214 |
|          | Corn   |          |                                          |          |     |
| Duodenum | stover | Negative | cell transformation                      | 1.20E-09 | 207 |
|          | Corn   |          |                                          |          |     |
| Duodenum | stover | Negative | neurological signs                       | 1.20E-09 | 283 |
|          | Corn   |          |                                          |          |     |
| Duodenum | stover | Negative | necrosis of epithelial tissue            | 1.37E-09 | 258 |
|          | Corn   |          |                                          |          |     |
| Duodenum | stover | Negative | cell death of cervical cancer cell lines | 1.38E-09 | 162 |
|          | Corn   |          |                                          |          |     |
| Duodenum | stover | Negative | benign neoplasia                         | 1.38E-09 | 389 |
|          | Corn   |          |                                          |          |     |
| Duodenum | stover | Negative | formation of filaments                   | 1.54E-09 | 181 |
|          | Corn   |          |                                          |          |     |
| Duodenum | stover | Negative | function of cardiovascular system        | 2.22E-09 | 169 |
|          | Corn   |          |                                          |          |     |
| Duodenum | stover | Negative | apoptosis of fibroblast cell lines       | 2.27E-09 | 152 |
|          | Corn   |          |                                          |          |     |
| Duodenum | stover | Negative | cell death of fibroblast cell lines      | 2.76E-09 | 192 |
|          | Corn   |          |                                          |          |     |
| Duodenum | stover | Negative | concentration of lipid                   | 3.31E-09 | 343 |
|          | Corn   |          |                                          |          |     |
| Duodenum | stover | Negative | ubiquitination                           | 3.39E-09 | 155 |
|          | Corn   |          |                                          |          |     |
| Duodenum | stover | Negative | apoptosis of connective tissue cells     | 3.79E-09 | 138 |
|          | Corn   |          |                                          |          |     |
| Duodenum | stover | Negative | protein kinase cascade                   | 4.13E-09 | 189 |
|          | Corn   |          |                                          |          |     |
| Duodenum | stover | Negative | migration of tumor cell lines            | 4.22E-09 | 302 |
|          | Corn   |          |                                          |          |     |
| Duodenum | stover | Negative | chorea                                   | 4.22E-09 | 251 |
|          | Corn   |          |                                          |          |     |
| Duodenum | stover | Negative | Huntington's Disease                     | 4.58E-09 | 250 |
|          | Corn   |          |                                          |          |     |
| Duodenum | stover | Negative | colony formation of cells                | 4.86E-09 | 217 |
|          | Corn   |          |                                          |          |     |
| Duodenum | stover | Negative | formation of actin filaments             | 5.76E-09 | 141 |
|          | Corn   |          |                                          |          |     |
| Duodenum | stover | Negative | activation of DNA endogenous promoter    | 6.00E-09 | 492 |
|          | Corn   |          |                                          |          |     |
| Duodenum | stover | Negative | size of embryo                           | 6.27E-09 | 162 |
| Duodenum | Corn   | Negative | cell viability of tumor cell lines       | 6.27E-09 | 329 |

|          |        |          |                                         |          |      |
|----------|--------|----------|-----------------------------------------|----------|------|
|          | stover |          |                                         |          |      |
|          | Corn   |          |                                         |          |      |
| Duodenum | stover | Negative | synthesis of lipid                      | 6.42E-09 | 304  |
|          | Corn   |          |                                         |          |      |
| Duodenum | stover | Negative | cell death of epithelial cells          | 8.19E-09 | 218  |
|          | Corn   |          |                                         |          |      |
| Duodenum | stover | Negative | abnormal morphology of embryonic tissue | 9.20E-09 | 238  |
|          | Corn   |          |                                         |          |      |
| Duodenum | stover | Negative | abnormal morphology of heart            | 1.06E-08 | 172  |
|          | Corn   |          |                                         |          |      |
| Duodenum | stover | Negative | adenocarcinoma                          | 1.67E-08 | 2381 |
|          | Corn   |          |                                         |          |      |
| Duodenum | stover | Negative | quantity of leukocytes                  | 1.76E-08 | 379  |
|          | Corn   |          |                                         |          |      |
| Duodenum | stover | Negative | growth of muscle tissue                 | 1.91E-08 | 167  |
|          | Corn   |          |                                         |          |      |
| Duodenum | stover | Negative | proliferation of muscle cells           | 2.05E-08 | 166  |
|          | Corn   |          |                                         |          |      |
| Duodenum | stover | Negative | colony formation                        | 2.05E-08 | 232  |
|          | Corn   |          |                                         |          |      |
| Duodenum | stover | Negative | metabolism of carbohydrate              | 2.24E-08 | 265  |
|          | Corn   |          |                                         |          |      |
| Duodenum | stover | Negative | ubiquitination of protein               | 2.24E-08 | 150  |
|          | Corn   |          |                                         |          |      |
| Duodenum | stover | Negative | movement of vascular endothelial cells  | 3.61E-08 | 88   |
|          | Corn   |          |                                         |          |      |
| Duodenum | stover | Negative | apoptosis of cervical cancer cell lines | 3.71E-08 | 129  |
|          | Corn   |          |                                         |          |      |
| Duodenum | stover | Negative | development of connective tissue        | 3.80E-08 | 165  |
|          | Corn   |          |                                         |          |      |
| Duodenum | stover | Negative | degeneration of nervous system          | 3.95E-08 | 131  |
|          | Corn   |          |                                         |          |      |
| Duodenum | stover | Negative | migration of muscle cells               | 4.06E-08 | 81   |
|          | Corn   |          |                                         |          |      |
| Duodenum | stover | Negative | congenital malformation of skeleton     | 5.80E-08 | 185  |
|          | Corn   |          |                                         |          |      |
| Duodenum | stover | Negative | abnormal morphology of nervous system   | 6.31E-08 | 303  |
|          | Corn   |          |                                         |          |      |
| Duodenum | stover | Negative | size of animal                          | 6.65E-08 | 86   |
|          | Corn   |          |                                         |          |      |
| Duodenum | stover | Negative | neuronal cell death                     | 7.00E-08 | 286  |
|          | Corn   |          |                                         |          |      |
| Duodenum | stover | Negative | cell movement of endothelial cells      | 7.04E-08 | 157  |
| Duodenum | Corn   | Negative | formation of actin stress fibers        | 7.33E-08 | 111  |

|          |                |          |                                           |          |      |
|----------|----------------|----------|-------------------------------------------|----------|------|
|          | stover<br>Corn |          |                                           |          |      |
| Duodenum | stover<br>Corn | Negative | morphology of nervous system              | 7.73E-08 | 325  |
| Duodenum | stover<br>Corn | Negative | formation of skin                         | 7.96E-08 | 162  |
| Duodenum | stover<br>Corn | Negative | proliferation of smooth muscle cells      | 1.03E-07 | 129  |
| Duodenum | stover<br>Corn | Negative | migration of smooth muscle cells          | 1.10E-07 | 73   |
| Duodenum | stover<br>Corn | Negative | craniofacial abnormality                  | 1.19E-07 | 157  |
| Duodenum | stover<br>Corn | Negative | morphology of respiratory system          | 1.33E-07 | 139  |
| Duodenum | stover<br>Corn | Negative | seizures                                  | 1.39E-07 | 174  |
| Duodenum | stover<br>Corn | Negative | cell movement of fibroblasts              | 1.44E-07 | 87   |
| Duodenum | stover<br>Corn | Negative | cell movement of muscle cells             | 1.49E-07 | 86   |
| Duodenum | stover<br>Corn | Negative | abnormal morphology of respiratory system | 1.50E-07 | 137  |
| Duodenum | stover<br>Corn | Negative | quantity of blood cells                   | 1.50E-07 | 415  |
| Duodenum | stover<br>Corn | Negative | transactivation                           | 1.65E-07 | 244  |
| Duodenum | stover<br>Corn | Negative | cell death of embryonic cells             | 1.66E-07 | 59   |
| Duodenum | stover<br>Corn | Negative | abdominal adenocarcinoma                  | 1.68E-07 | 2161 |
| Duodenum | stover<br>Corn | Negative | growth of epithelial tissue               | 1.97E-07 | 283  |
| Duodenum | stover<br>Corn | Negative | genital tumor                             | 2.25E-07 | 1502 |
| Duodenum | stover<br>Corn | Negative | apoptosis of epithelial cell lines        | 2.25E-07 | 103  |
| Duodenum | stover<br>Corn | Negative | seizure disorder                          | 2.25E-07 | 201  |
| Duodenum | stover<br>Corn | Negative | morphology of head                        | 2.47E-07 | 357  |
| Duodenum | stover<br>Corn | Negative | Neurodegeneration                         | 2.59E-07 | 137  |
| Duodenum | stover         | Negative | breast or colorectal cancer               | 3.07E-07 | 1828 |
| Duodenum | Corn           | Negative | neuromuscular disease                     | 3.13E-07 | 359  |

|          |        |          |                                            |          |      |
|----------|--------|----------|--------------------------------------------|----------|------|
|          | stover |          |                                            |          |      |
|          | Corn   |          |                                            |          |      |
| Duodenum | stover | Negative | abnormal morphology of head                | 3.13E-07 | 340  |
|          | Corn   |          |                                            |          |      |
| Duodenum | stover | Negative | hepatobiliary system cancer                | 3.17E-07 | 1607 |
|          | Corn   |          |                                            |          |      |
| Duodenum | stover | Negative | cell death of epithelial cell lines        | 3.23E-07 | 126  |
|          | Corn   |          |                                            |          |      |
| Duodenum | stover | Negative | cell movement of smooth muscle cells       | 3.23E-07 | 77   |
|          | Corn   |          |                                            |          |      |
| Duodenum | stover | Negative | metabolism of DNA                          | 3.40E-07 | 172  |
|          | Corn   |          |                                            |          |      |
| Duodenum | stover | Negative | neonatal death                             | 3.59E-07 | 188  |
|          | Corn   |          |                                            |          |      |
| Duodenum | stover | Negative | Organ Degeneration                         | 4.00E-07 | 209  |
|          | Corn   |          |                                            |          |      |
| Duodenum | stover | Negative | female genital neoplasm                    | 4.54E-07 | 1326 |
|          | Corn   |          |                                            |          |      |
| Duodenum | stover | Negative | differentiation of epithelial tissue       | 4.70E-07 | 156  |
|          | Corn   |          |                                            |          |      |
| Duodenum | stover | Negative | development of cardiovascular tissue       | 4.70E-07 | 160  |
|          | Corn   |          |                                            |          |      |
| Duodenum | stover | Negative | liver cancer                               | 4.70E-07 | 1598 |
|          | Corn   |          |                                            |          |      |
| Duodenum | stover | Negative | liver tumor                                | 4.88E-07 | 1608 |
|          | Corn   |          |                                            |          |      |
| Duodenum | stover | Negative | hepatocellular carcinoma                   | 5.22E-07 | 1549 |
|          | Corn   |          |                                            |          |      |
| Duodenum | stover | Negative | metabolism of protein                      | 5.75E-07 | 391  |
|          | Corn   |          |                                            |          |      |
| Duodenum | stover | Negative | development of head                        | 5.99E-07 | 394  |
|          | Corn   |          |                                            |          |      |
| Duodenum | stover | Negative | survival of organism                       | 6.22E-07 | 289  |
|          | Corn   |          |                                            |          |      |
| Duodenum | stover | Negative | development of body axis                   | 6.41E-07 | 420  |
|          | Corn   |          |                                            |          |      |
| Duodenum | stover | Negative | synthesis of DNA                           | 6.93E-07 | 178  |
|          | Corn   |          |                                            |          |      |
| Duodenum | stover | Negative | transactivation of RNA                     | 8.29E-07 | 227  |
|          | Corn   |          |                                            |          |      |
| Duodenum | stover | Negative | cell death of stem cells                   | 8.59E-07 | 44   |
|          | Corn   |          |                                            |          |      |
| Duodenum | stover | Negative | differentiation of connective tissue cells | 9.20E-07 | 265  |
| Duodenum | Corn   | Negative | cell death of pheochromocytoma cell lines  | 9.21E-07 | 59   |

|          |        |          |                                          |          |      |
|----------|--------|----------|------------------------------------------|----------|------|
|          | stover |          |                                          |          |      |
|          | Corn   |          |                                          |          |      |
| Duodenum | stover | Negative | migration of vascular endothelial cells  | 9.21E-07 | 78   |
|          | Corn   |          |                                          |          |      |
| Duodenum | stover | Negative | cellular degradation                     | 9.63E-07 | 113  |
|          | Corn   |          |                                          |          |      |
| Duodenum | stover | Negative | differentiation of connective tissue     | 9.69E-07 | 298  |
|          | Corn   |          |                                          |          |      |
| Duodenum | stover | Negative | development of leukocytes                | 9.80E-07 | 244  |
|          | Corn   |          |                                          |          |      |
| Duodenum | stover | Negative | proliferation of fibroblasts             | 1.02E-06 | 152  |
|          | Corn   |          |                                          |          |      |
| Duodenum | stover | Negative | differentiation of tumor cell lines      | 1.19E-06 | 162  |
|          | Corn   |          |                                          |          |      |
| Duodenum | stover | Negative | development of blood cells               | 1.24E-06 | 268  |
|          | Corn   |          |                                          |          |      |
| Duodenum | stover | Negative | apoptosis of fibroblasts                 | 1.39E-06 | 98   |
|          | Corn   |          |                                          |          |      |
| Duodenum | stover | Negative | necrosis of kidney                       | 1.41E-06 | 156  |
|          | Corn   |          |                                          |          |      |
| Duodenum | stover | Negative | invasion of tissue                       | 1.49E-06 | 89   |
|          | Corn   |          |                                          |          |      |
| Duodenum | stover | Negative | S phase                                  | 1.50E-06 | 115  |
|          | Corn   |          |                                          |          |      |
| Duodenum | stover | Negative | apoptosis of kidney cell lines           | 1.54E-06 | 106  |
|          | Corn   |          |                                          |          |      |
| Duodenum | stover | Negative | cell spreading                           | 1.70E-06 | 121  |
|          | Corn   |          |                                          |          |      |
| Duodenum | stover | Negative | Bleeding                                 | 1.72E-06 | 179  |
|          | Corn   |          |                                          |          |      |
| Duodenum | stover | Negative | quantity of lymphocytes                  | 1.72E-06 | 288  |
|          | Corn   |          |                                          |          |      |
| Duodenum | stover | Negative | morphology of bone                       | 1.73E-06 | 189  |
|          | Corn   |          |                                          |          |      |
| Duodenum | stover | Negative | uptake of monosaccharide                 | 1.73E-06 | 118  |
|          | Corn   |          |                                          |          |      |
| Duodenum | stover | Negative | concentration of fatty acid              | 1.87E-06 | 122  |
|          | Corn   |          |                                          |          |      |
| Duodenum | stover | Negative | epilepsy                                 | 1.96E-06 | 133  |
|          | Corn   |          |                                          |          |      |
| Duodenum | stover | Negative | Gastrointestinal Tract Cancer and Tumors | 2.03E-06 | 1878 |
|          | Corn   |          |                                          |          |      |
| Duodenum | stover | Negative | migration of endothelial cells           | 2.04E-06 | 141  |
| Duodenum | Corn   | Negative | gastrointestinal tract cancer            | 2.06E-06 | 1849 |



|          |        |          |                                           |          |      |  |
|----------|--------|----------|-------------------------------------------|----------|------|--|
|          | stover |          |                                           |          |      |  |
|          | Corn   |          |                                           |          |      |  |
| Duodenum | stover | Negative | behavior                                  | 2.12E-06 | 393  |  |
|          | Corn   |          |                                           |          |      |  |
| Duodenum | stover | Negative | quantity of mononuclear leukocytes        | 2.13E-06 | 298  |  |
|          | Corn   |          |                                           |          |      |  |
| Duodenum | stover | Negative | cardiogenesis                             | 2.24E-06 | 197  |  |
|          | Corn   |          |                                           |          |      |  |
| Duodenum | stover | Negative | differentiation of epithelial cells       | 2.31E-06 | 135  |  |
|          | Corn   |          |                                           |          |      |  |
| Duodenum | stover | Negative | uptake of carbohydrate                    | 2.31E-06 | 126  |  |
|          | Corn   |          |                                           |          |      |  |
| Duodenum | stover | Negative | cell death of kidney cells                | 2.36E-06 | 149  |  |
|          | Corn   |          |                                           |          |      |  |
| Duodenum | stover | Negative | abnormal morphology of bone               | 2.39E-06 | 183  |  |
|          | Corn   |          |                                           |          |      |  |
| Duodenum | stover | Negative | formation of focal adhesions              | 2.39E-06 | 72   |  |
|          | Corn   |          |                                           |          |      |  |
| Duodenum | stover | Negative | abnormal morphology of epithelial tissue  | 2.41E-06 | 176  |  |
|          | Corn   |          |                                           |          |      |  |
| Duodenum | stover | Negative | morphology of digestive system            | 2.43E-06 | 235  |  |
|          | Corn   |          |                                           |          |      |  |
| Duodenum | stover | Negative | gastrointestinal carcinoma                | 2.44E-06 | 1662 |  |
|          | Corn   |          |                                           |          |      |  |
| Duodenum | stover | Negative | breast or ovarian cancer                  | 2.59E-06 | 729  |  |
|          | Corn   |          |                                           |          |      |  |
| Duodenum | stover | Negative | mitosis of cervical cancer cell lines     | 2.59E-06 | 49   |  |
|          | Corn   |          |                                           |          |      |  |
| Duodenum | stover | Negative | migration of fibroblasts                  | 2.73E-06 | 67   |  |
|          | Corn   |          |                                           |          |      |  |
| Duodenum | stover | Negative | Hypertrophy                               | 2.81E-06 | 197  |  |
|          | Corn   |          |                                           |          |      |  |
| Duodenum | stover | Negative | cell viability of connective tissue cells | 2.95E-06 | 63   |  |
|          | Corn   |          |                                           |          |      |  |
| Duodenum | stover | Negative | mitosis of tumor cell lines               | 2.95E-06 | 63   |  |
|          | Corn   |          |                                           |          |      |  |
| Duodenum | stover | Negative | synthesis of carbohydrate                 | 3.03E-06 | 178  |  |
|          | Corn   |          |                                           |          |      |  |
| Duodenum | stover | Negative | development of endothelial tissue         | 3.03E-06 | 155  |  |
|          | Corn   |          |                                           |          |      |  |
| Duodenum | stover | Negative | cell death of neuroblastoma cell lines    | 3.04E-06 | 87   |  |
|          | Corn   |          |                                           |          |      |  |
| Duodenum | stover | Negative | neuritogenesis                            | 3.04E-06 | 239  |  |
| Duodenum | Corn   | Negative | formation of muscle                       | 3.17E-06 | 167  |  |

|          |        |          |                                           |          |     |
|----------|--------|----------|-------------------------------------------|----------|-----|
|          | stover |          |                                           |          |     |
|          | Corn   |          |                                           |          |     |
| Duodenum | stover | Negative | proliferation of immune cells             | 3.35E-06 | 318 |
|          | Corn   |          |                                           |          |     |
| Duodenum | stover | Negative | degeneration of neurons                   | 3.36E-06 | 105 |
|          | Corn   |          |                                           |          |     |
| Duodenum | stover | Negative | transport of D-glucose                    | 3.52E-06 | 67  |
|          | Corn   |          |                                           |          |     |
| Duodenum | stover | Negative | Lymphocyte homeostasis                    | 3.57E-06 | 224 |
|          | Corn   |          |                                           |          |     |
| Duodenum | stover | Negative | transport of carbohydrate                 | 3.76E-06 | 87  |
|          | Corn   |          |                                           |          |     |
| Duodenum | stover | Negative | development of epithelial tissue          | 3.76E-06 | 213 |
|          | Corn   |          |                                           |          |     |
| Duodenum | stover | Negative | cell death of kidney cell lines           | 3.78E-06 | 130 |
|          | Corn   |          |                                           |          |     |
| Duodenum | stover | Negative | migration of vascular smooth muscle cells | 3.83E-06 | 51  |
|          | Corn   |          |                                           |          |     |
| Duodenum | stover | Negative | development of lymphocytes                | 3.93E-06 | 227 |
|          | Corn   |          |                                           |          |     |
| Duodenum | stover | Negative | growth of tumor                           | 4.03E-06 | 319 |
|          | Corn   |          |                                           |          |     |
| Duodenum | stover | Negative | female genital tract serous cancer        | 4.03E-06 | 162 |
|          | Corn   |          |                                           |          |     |
| Duodenum | stover | Negative | abnormal morphology of abdomen            | 4.09E-06 | 349 |
|          | Corn   |          |                                           |          |     |
| Duodenum | stover | Negative | cell movement of connective tissue cells  | 4.35E-06 | 98  |
|          | Corn   |          |                                           |          |     |
| Duodenum | stover | Negative | morphology of connective tissue           | 4.36E-06 | 191 |
|          | Corn   |          |                                           |          |     |
| Duodenum | stover | Negative | proliferation of blood cells              | 4.39E-06 | 336 |
|          | Corn   |          |                                           |          |     |
| Duodenum | stover | Negative | abnormal morphology of digestive system   | 4.78E-06 | 223 |
|          | Corn   |          |                                           |          |     |
| Duodenum | stover | Negative | homeostasis of leukocytes                 | 4.89E-06 | 227 |
|          | Corn   |          |                                           |          |     |
| Duodenum | stover | Negative | T cell homeostasis                        | 5.06E-06 | 212 |
|          | Corn   |          |                                           |          |     |
| Duodenum | stover | Negative | proliferation of neuronal cells           | 5.06E-06 | 235 |
|          | Corn   |          |                                           |          |     |
| Duodenum | stover | Negative | cell death of muscle cells                | 5.20E-06 | 142 |
|          | Corn   |          |                                           |          |     |
| Duodenum | stover | Negative | cell death of embryonic stem cells        | 5.34E-06 | 28  |
| Duodenum | Corn   | Negative | invasion of carcinoma cell lines          | 5.34E-06 | 88  |

|          |                |          |                                               |          |      |
|----------|----------------|----------|-----------------------------------------------|----------|------|
|          | stover<br>Corn |          |                                               |          |      |
| Duodenum | stover<br>Corn | Negative | abdominal carcinoma                           | 5.36E-06 | 2171 |
| Duodenum | stover<br>Corn | Negative | endothelial cell development                  | 5.39E-06 | 149  |
| Duodenum | stover<br>Corn | Negative | replication of RNA virus                      | 5.40E-06 | 208  |
| Duodenum | stover<br>Corn | Negative | infection by Retroviridae                     | 5.74E-06 | 289  |
| Duodenum | stover<br>Corn | Negative | development of lymphatic system               | 5.74E-06 | 150  |
| Duodenum | stover<br>Corn | Negative | formation of lymphoid organ                   | 6.19E-06 | 114  |
| Duodenum | stover<br>Corn | Negative | migration of connective tissue cells          | 6.35E-06 | 81   |
| Duodenum | stover<br>Corn | Negative | cell death of muscle                          | 6.35E-06 | 145  |
| Duodenum | stover<br>Corn | Negative | growth of embryonic tissue                    | 6.46E-06 | 118  |
| Duodenum | stover<br>Corn | Negative | HIV infection                                 | 6.50E-06 | 286  |
| Duodenum | stover<br>Corn | Negative | activation of cells                           | 6.61E-06 | 385  |
| Duodenum | stover<br>Corn | Negative | death of perinatal stage organism             | 6.79E-06 | 41   |
| Duodenum | stover<br>Corn | Negative | activation of enzyme                          | 6.80E-06 | 162  |
| Duodenum | stover<br>Corn | Negative | infection by HIV-1                            | 7.00E-06 | 247  |
| Duodenum | stover<br>Corn | Negative | T cell development                            | 7.02E-06 | 206  |
| Duodenum | stover<br>Corn | Negative | cell movement of vascular smooth muscle cells | 7.27E-06 | 54   |
| Duodenum | stover<br>Corn | Negative | development of lymphatic system component     | 7.46E-06 | 131  |
| Duodenum | stover<br>Corn | Negative | necrosis of muscle                            | 7.86E-06 | 144  |
| Duodenum | stover<br>Corn | Negative | morphology of vessel                          | 8.08E-06 | 130  |
| Duodenum | stover<br>Corn | Negative | transmembrane potential of mitochondria       | 8.11E-06 | 94   |
| Duodenum | stover         | Negative | autosomal dominant disease                    | 8.11E-06 | 257  |
| Duodenum | Corn           | Negative | learning                                      | 8.14E-06 | 173  |

|          |                |          |                                          |          |      |
|----------|----------------|----------|------------------------------------------|----------|------|
|          | stover<br>Corn |          |                                          |          |      |
| Duodenum | stover<br>Corn | Negative | cognition                                | 8.36E-06 | 187  |
| Duodenum | stover<br>Corn | Negative | apoptosis of pheochromocytoma cell lines | 8.46E-06 | 45   |
| Duodenum | stover<br>Corn | Negative | formation of lymphatic system component  | 9.26E-06 | 124  |
| Duodenum | stover<br>Corn | Negative | apoptosis of stem cells                  | 9.37E-06 | 36   |
| Duodenum | stover<br>Corn | Negative | apoptosis of muscle                      | 9.94E-06 | 112  |
| Duodenum | stover<br>Corn | Negative | development of neurons                   | 1.00E-05 | 311  |
| Duodenum | stover<br>Corn | Negative | Edema                                    | 1.05E-05 | 144  |
| Duodenum | stover<br>Corn | Negative | function of blood cells                  | 1.10E-05 | 237  |
| Duodenum | stover<br>Corn | Negative | multiple congenital anomalies            | 1.11E-05 | 174  |
| Duodenum | stover<br>Corn | Negative | development of digestive system          | 1.12E-05 | 159  |
| Duodenum | stover<br>Corn | Negative | morphology of mouth                      | 1.12E-05 | 62   |
| Duodenum | stover<br>Corn | Negative | morphogenesis of neurons                 | 1.16E-05 | 175  |
| Duodenum | stover<br>Corn | Negative | tumorigenesis of genital organ           | 1.17E-05 | 1435 |
| Duodenum | stover<br>Corn | Negative | cell movement of blood cells             | 1.23E-05 | 345  |
| Duodenum | stover<br>Corn | Negative | apoptosis of muscle cells                | 1.26E-05 | 111  |
| Duodenum | stover<br>Corn | Negative | apoptosis of neuroblastoma cell lines    | 1.26E-05 | 57   |
| Duodenum | stover<br>Corn | Negative | apoptosis of embryonic cells             | 1.27E-05 | 47   |
| Duodenum | stover<br>Corn | Negative | migration of blood cells                 | 1.31E-05 | 344  |
| Duodenum | stover<br>Corn | Negative | formation of plasma membrane projections | 1.46E-05 | 240  |
| Duodenum | stover<br>Corn | Negative | leukocyte migration                      | 1.55E-05 | 343  |
| Duodenum | stover         | Negative | transport of monosaccharide              | 1.67E-05 | 71   |
| Duodenum | Corn           | Negative | cell death of lymphocytes                | 1.69E-05 | 159  |

|          |        |          |                                              |          |     |
|----------|--------|----------|----------------------------------------------|----------|-----|
|          | stover |          |                                              |          |     |
|          | Corn   |          |                                              |          |     |
| Duodenum | stover | Negative | proliferation of epidermal cells             | 1.70E-05 | 75  |
|          | Corn   |          |                                              |          |     |
| Duodenum | stover | Negative | quantity of connective tissue                | 1.71E-05 | 242 |
|          | Corn   |          |                                              |          |     |
| Duodenum | stover | Negative | proliferation of dermal cells                | 1.78E-05 | 78  |
|          | Corn   |          |                                              |          |     |
| Duodenum | stover | Negative | quantity of reactive oxygen species          | 1.78E-05 | 78  |
|          | Corn   |          |                                              |          |     |
| Duodenum | stover | Negative | function of leukocytes                       | 1.78E-05 | 217 |
|          | Corn   |          |                                              |          |     |
| Duodenum | stover | Negative | mass of organism                             | 1.78E-05 | 139 |
|          | Corn   |          |                                              |          |     |
| Duodenum | stover | Negative | cell death of blood cells                    | 1.78E-05 | 276 |
|          | Corn   |          |                                              |          |     |
| Duodenum | stover | Negative | infection of cells                           | 1.78E-05 | 315 |
|          | Corn   |          |                                              |          |     |
| Duodenum | stover | Negative | ruffling                                     | 1.80E-05 | 51  |
|          | Corn   |          |                                              |          |     |
| Duodenum | stover | Negative | morphology of skin                           | 1.81E-05 | 115 |
|          | Corn   |          |                                              |          |     |
| Duodenum | stover | Negative | differentiation of epidermal cells           | 1.85E-05 | 73  |
|          | Corn   |          |                                              |          |     |
| Duodenum | stover | Negative | sprouting                                    | 1.88E-05 | 159 |
|          | Corn   |          |                                              |          |     |
| Duodenum | stover | Negative | Hypertension                                 | 1.90E-05 | 256 |
|          | Corn   |          |                                              |          |     |
| Duodenum | stover | Negative | cell viability of cervical cancer cell lines | 1.93E-05 | 95  |
|          | Corn   |          |                                              |          |     |
| Duodenum | stover | Negative | cell death of immune cells                   | 2.00E-05 | 263 |
|          | Corn   |          |                                              |          |     |
| Duodenum | stover | Negative | cell death of mononuclear leukocytes         | 2.01E-05 | 163 |
|          | Corn   |          |                                              |          |     |
| Duodenum | stover | Negative | morphology of limb                           | 2.10E-05 | 99  |
|          | Corn   |          |                                              |          |     |
| Duodenum | stover | Negative | serous neoplasm                              | 2.14E-05 | 244 |
|          | Corn   |          |                                              |          |     |
| Duodenum | stover | Negative | transport of alpha-amino acid                | 2.14E-05 | 36  |
|          | Corn   |          |                                              |          |     |
| Duodenum | stover | Negative | cell death of tumor                          | 2.18E-05 | 157 |
|          | Corn   |          |                                              |          |     |
| Duodenum | stover | Negative | abnormal morphology of limb                  | 2.25E-05 | 98  |
| Duodenum | Corn   | Negative | synthesis of fatty acid                      | 2.28E-05 | 130 |

|          |        |          |                                           |          |      |
|----------|--------|----------|-------------------------------------------|----------|------|
|          | stover |          |                                           |          |      |
|          | Corn   |          |                                           |          |      |
| Duodenum | stover | Negative | genital tract cancer                      | 2.32E-05 | 1419 |
|          | Corn   |          |                                           |          |      |
| Duodenum | stover | Negative | transformation of fibroblast cell lines   | 2.38E-05 | 109  |
|          | Corn   |          |                                           |          |      |
| Duodenum | stover | Negative | invasion of lung cancer cell lines        | 2.41E-05 | 49   |
|          | Corn   |          |                                           |          |      |
| Duodenum | stover | Negative | formation of thymus gland                 | 2.41E-05 | 72   |
|          | Corn   |          |                                           |          |      |
| Duodenum | stover | Negative | arrest in interphase                      | 2.44E-05 | 170  |
|          | Corn   |          |                                           |          |      |
| Duodenum | stover | Negative | leukopenia                                | 2.57E-05 | 60   |
|          | Corn   |          |                                           |          |      |
| Duodenum | stover | Negative | growth of plasma membrane projections     | 2.58E-05 | 189  |
|          | Corn   |          |                                           |          |      |
| Duodenum | stover | Negative | proliferation of epithelial cells         | 2.60E-05 | 199  |
|          | Corn   |          |                                           |          |      |
| Duodenum | stover | Negative | differentiation of muscle                 | 2.66E-05 | 126  |
|          | Corn   |          |                                           |          |      |
| Duodenum | stover | Negative | tumorigenesis of reproductive tract       | 2.75E-05 | 1254 |
|          | Corn   |          |                                           |          |      |
| Duodenum | stover | Negative | degeneration of cells                     | 2.76E-05 | 142  |
|          | Corn   |          |                                           |          |      |
| Duodenum | stover | Negative | sensitivity of cells                      | 2.81E-05 | 64   |
|          | Corn   |          |                                           |          |      |
| Duodenum | stover | Negative | cell death of heart                       | 2.86E-05 | 97   |
|          | Corn   |          |                                           |          |      |
| Duodenum | stover | Negative | small GTPase mediated signal transduction | 2.86E-05 | 80   |
|          | Corn   |          |                                           |          |      |
| Duodenum | stover | Negative | outgrowth of plasma membrane projections  | 2.92E-05 | 166  |
|          | Corn   |          |                                           |          |      |
| Duodenum | stover | Negative | secretion of molecule                     | 2.92E-05 | 221  |
|          | Corn   |          |                                           |          |      |
| Duodenum | stover | Negative | cell death of heart cells                 | 2.93E-05 | 94   |
|          | Corn   |          |                                           |          |      |
| Duodenum | stover | Negative | I-kappaB kinase/NF-kappaB cascade         | 2.94E-05 | 76   |
|          | Corn   |          |                                           |          |      |
| Duodenum | stover | Negative | hypertrophy of tissue                     | 2.96E-05 | 108  |
|          | Corn   |          |                                           |          |      |
| Duodenum | stover | Negative | stress response of cells                  | 3.01E-05 | 62   |
|          | Corn   |          |                                           |          |      |
| Duodenum | stover | Negative | cytopenia                                 | 3.05E-05 | 124  |
| Duodenum | Corn   | Negative | concentration of phosphatidic acid        | 3.13E-05 | 61   |

|          |                |          |                                               |          |      |
|----------|----------------|----------|-----------------------------------------------|----------|------|
|          | stover<br>Corn |          |                                               |          |      |
| Duodenum | stover<br>Corn | Negative | proliferation of mononuclear leukocytes       | 3.15E-05 | 291  |
| Duodenum | stover<br>Corn | Negative | activation of Protein kinase                  | 3.46E-05 | 106  |
| Duodenum | stover<br>Corn | Negative | morphogenesis of neurites                     | 3.46E-05 | 170  |
| Duodenum | stover<br>Corn | Negative | cell movement of fibroblast cell lines        | 3.48E-05 | 73   |
| Duodenum | stover<br>Corn | Negative | growth of lymphatic system component          | 3.48E-05 | 83   |
| Duodenum | stover<br>Corn | Negative | binding of DNA                                | 3.48E-05 | 209  |
| Duodenum | stover<br>Corn | Negative | accumulation of lipid                         | 3.53E-05 | 124  |
| Duodenum | stover<br>Corn | Negative | differentiation of leukocytes                 | 3.56E-05 | 266  |
| Duodenum | stover<br>Corn | Negative | mammary tumor                                 | 3.63E-05 | 619  |
| Duodenum | stover<br>Corn | Negative | proliferation of vascular smooth muscle cells | 3.63E-05 | 68   |
| Duodenum | stover<br>Corn | Negative | growth of lymphoid organ                      | 3.81E-05 | 75   |
| Duodenum | stover<br>Corn | Negative | replication of virus                          | 3.81E-05 | 224  |
| Duodenum | stover<br>Corn | Negative | female genital tract cancer                   | 4.04E-05 | 1244 |
| Duodenum | stover<br>Corn | Negative | necrosis of tumor                             | 4.15E-05 | 155  |
| Duodenum | stover<br>Corn | Negative | transport of amino acids                      | 4.15E-05 | 60   |
| Duodenum | stover<br>Corn | Negative | paraproteinemia                               | 4.24E-05 | 138  |
| Duodenum | stover<br>Corn | Negative | DNA replication                               | 4.34E-05 | 105  |
| Duodenum | stover<br>Corn | Negative | cartilage development                         | 4.44E-05 | 64   |
| Duodenum | stover<br>Corn | Negative | abnormal morphology of skull                  | 4.44E-05 | 93   |
| Duodenum | stover<br>Corn | Negative | growth of neurites                            | 4.44E-05 | 186  |
| Duodenum | stover         | Negative | incidence of tumor                            | 4.45E-05 | 132  |
| Duodenum | Corn           | Negative | muscular hypertrophy                          | 4.69E-05 | 87   |

|          |        |          |                                         |          |      |
|----------|--------|----------|-----------------------------------------|----------|------|
|          | stover |          |                                         |          |      |
|          | Corn   |          |                                         |          |      |
| Duodenum | stover | Negative | outgrowth of cells                      | 4.69E-05 | 175  |
|          | Corn   |          |                                         |          |      |
| Duodenum | stover | Negative | quantity of carbohydrate                | 4.99E-05 | 207  |
|          | Corn   |          |                                         |          |      |
| Duodenum | stover | Negative | dysgenesis                              | 5.03E-05 | 215  |
|          | Corn   |          |                                         |          |      |
| Duodenum | stover | Negative | morphology of blood vessel              | 5.22E-05 | 117  |
|          | Corn   |          |                                         |          |      |
| Duodenum | stover | Negative | dysmyelination                          | 5.30E-05 | 60   |
|          | Corn   |          |                                         |          |      |
| Duodenum | stover | Negative | phosphorylation of L-amino acid         | 5.30E-05 | 93   |
|          | Corn   |          |                                         |          |      |
| Duodenum | stover | Negative | apoptosis of epithelial cells           | 5.62E-05 | 118  |
|          | Corn   |          |                                         |          |      |
| Duodenum | stover | Negative | quantity of thymocytes                  | 5.62E-05 | 97   |
|          | Corn   |          |                                         |          |      |
| Duodenum | stover | Negative | colon cancer                            | 5.63E-05 | 1350 |
|          | Corn   |          |                                         |          |      |
| Duodenum | stover | Negative | cell death of tumor cells               | 5.64E-05 | 151  |
|          | Corn   |          |                                         |          |      |
| Duodenum | stover | Negative | proliferation of lymphocytes            | 5.69E-05 | 285  |
|          | Corn   |          |                                         |          |      |
| Duodenum | stover | Negative | vascularization                         | 5.69E-05 | 99   |
|          | Corn   |          |                                         |          |      |
| Duodenum | stover | Negative | bone mineral density                    | 5.72E-05 | 75   |
|          | Corn   |          |                                         |          |      |
| Duodenum | stover | Negative | metabolism of membrane lipid derivative | 5.76E-05 | 157  |
|          | Corn   |          |                                         |          |      |
| Duodenum | stover | Negative | apoptosis of heart cells                | 5.76E-05 | 81   |
|          | Corn   |          |                                         |          |      |
| Duodenum | stover | Negative | quantity of T lymphocytes               | 5.76E-05 | 213  |
|          | Corn   |          |                                         |          |      |
| Duodenum | stover | Negative | uptake of D-hexose                      | 5.78E-05 | 94   |
|          | Corn   |          |                                         |          |      |
| Duodenum | stover | Negative | plasma cell dyscrasia                   | 5.89E-05 | 137  |
|          | Corn   |          |                                         |          |      |
| Duodenum | stover | Negative | differentiation of blood cells          | 6.13E-05 | 328  |
|          | Corn   |          |                                         |          |      |
| Duodenum | stover | Negative | uptake of D-glucose                     | 6.22E-05 | 93   |
|          | Corn   |          |                                         |          |      |
| Duodenum | stover | Negative | differentiation of keratinocytes        | 6.23E-05 | 66   |
| Duodenum | Corn   | Negative | endometrium tumor                       | 6.29E-05 | 1061 |



|          |        |          |                                                    |          |      |
|----------|--------|----------|----------------------------------------------------|----------|------|
|          | stover |          |                                                    |          |      |
|          | Corn   |          |                                                    |          |      |
| Duodenum | stover | Negative | colon tumor                                        | 6.34E-05 | 1357 |
|          | Corn   |          |                                                    |          |      |
| Duodenum | stover | Negative | cell death of breast cancer cell lines             | 6.34E-05 | 136  |
|          | Corn   |          |                                                    |          |      |
| Duodenum | stover | Negative | Thrombosis                                         | 6.37E-05 | 73   |
|          | Corn   |          |                                                    |          |      |
| Duodenum | stover | Negative | midline defect                                     | 6.38E-05 | 110  |
|          | Corn   |          |                                                    |          |      |
| Duodenum | stover | Negative | oxidative stress response of cells                 | 6.38E-05 | 31   |
|          | Corn   |          |                                                    |          |      |
| Duodenum | stover | Negative | outgrowth of neurites                              | 6.47E-05 | 163  |
|          | Corn   |          |                                                    |          |      |
| Duodenum | stover | Negative | quantity of hematopoietic progenitor cells         | 6.97E-05 | 177  |
|          | Corn   |          |                                                    |          |      |
| Duodenum | stover | Negative | quantity of lymphoid organ                         | 6.97E-05 | 126  |
|          | Corn   |          |                                                    |          |      |
| Duodenum | stover | Negative | fatty acid metabolism                              | 7.36E-05 | 237  |
|          | Corn   |          |                                                    |          |      |
| Duodenum | stover | Negative | neoplasia of colon                                 | 7.40E-05 | 1352 |
|          | Corn   |          |                                                    |          |      |
| Duodenum | stover | Negative | uterine tumor                                      | 7.47E-05 | 1168 |
|          | Corn   |          |                                                    |          |      |
| Duodenum | stover | Negative | outgrowth of neurons                               | 7.59E-05 | 164  |
|          | Corn   |          |                                                    |          |      |
| Duodenum | stover | Negative | formation of lamellipodia                          | 7.59E-05 | 70   |
|          | Corn   |          |                                                    |          |      |
| Duodenum | stover | Negative | formation of reactive oxygen species               | 7.59E-05 | 41   |
|          | Corn   |          |                                                    |          |      |
| Duodenum | stover | Negative | morphology of cardiovascular tissue                | 7.59E-05 | 41   |
|          | Corn   |          |                                                    |          |      |
| Duodenum | stover | Negative | cell death of cardiomyocytes                       | 7.59E-05 | 90   |
|          | Corn   |          |                                                    |          |      |
| Duodenum | stover | Negative | colony formation of fibroblast cell lines          | 7.69E-05 | 43   |
|          | Corn   |          |                                                    |          |      |
| Duodenum | stover | Negative | cell death of myeloma cell lines                   | 7.69E-05 | 44   |
|          | Corn   |          |                                                    |          |      |
| Duodenum | stover | Negative | experimentally-induced diabetes                    | 7.69E-05 | 44   |
|          | Corn   |          |                                                    |          |      |
| Duodenum | stover | Negative | metabolism of nucleic acid component or derivative | 7.80E-05 | 206  |
|          | Corn   |          |                                                    |          |      |
| Duodenum | stover | Negative | morphology of skull                                | 7.97E-05 | 94   |
| Duodenum | Corn   | Negative | interphase of tumor cell lines                     | 8.19E-05 | 149  |

|          |                |          |                                         |          |      |
|----------|----------------|----------|-----------------------------------------|----------|------|
|          | stover<br>Corn |          |                                         |          |      |
| Duodenum | stover<br>Corn | Negative | recruitment of antigen presenting cells | 8.28E-05 | 54   |
| Duodenum | stover<br>Corn | Negative | concentration of phospholipid           | 8.31E-05 | 78   |
| Duodenum | stover<br>Corn | Negative | gastrointestinal adenocarcinoma         | 8.33E-05 | 1548 |
| Duodenum | stover<br>Corn | Negative | development of genitourinary system     | 8.51E-05 | 343  |
| Duodenum | stover<br>Corn | Negative | migration of fibroblast cell lines      | 8.61E-05 | 59   |
| Duodenum | stover<br>Corn | Negative | tumorigenesis of intestine              | 8.62E-05 | 1354 |
| Duodenum | stover<br>Corn | Negative | skin abnormality                        | 8.71E-05 | 95   |
| Duodenum | stover<br>Corn | Negative | urogenital cancer                       | 8.73E-05 | 1613 |
| Duodenum | stover<br>Corn | Negative | proliferation of embryonic cells        | 9.17E-05 | 103  |
| Duodenum | stover<br>Corn | Negative | branching of cells                      | 9.20E-05 | 149  |
| Duodenum | stover<br>Corn | Negative | morphology of muscle                    | 9.20E-05 | 136  |
| Duodenum | stover<br>Corn | Negative | infection by RNA virus                  | 9.23E-05 | 335  |
| Duodenum | stover<br>Corn | Negative | recruitment of cells                    | 9.31E-05 | 144  |
| Duodenum | stover<br>Corn | Negative | cell movement of leukocytes             | 9.65E-05 | 298  |
| Duodenum | stover<br>Corn | Negative | peripheral vascular disease             | 9.65E-05 | 153  |
| Duodenum | stover<br>Corn | Negative | recruitment of macrophages              | 9.70E-05 | 48   |
| Duodenum | stover<br>Corn | Negative | homing of cells                         | 9.71E-05 | 220  |
| Duodenum | stover<br>Corn | Negative | growth of skin                          | 9.74E-05 | 91   |
| Duodenum | stover<br>Corn | Negative | necrosis of cardiac muscle              | 9.74E-05 | 91   |
| Duodenum | stover<br>Corn | Negative | development of gastrointestinal tract   | 9.76E-05 | 108  |
| Duodenum | stover         | Negative | metabolism of nucleotide                | 9.76E-05 | 175  |
| Duodenum | Corn           | Negative | Hypoplasia                              | 9.76E-05 | 200  |

|          |        |          |                                        |          |      |
|----------|--------|----------|----------------------------------------|----------|------|
|          | stover |          |                                        |          |      |
|          | Corn   |          |                                        |          |      |
| Duodenum | stover | Negative | apoptosis of endothelial cells         | 9.81E-05 | 78   |
|          | Corn   |          |                                        |          |      |
| Duodenum | stover | Negative | endometrial cancer                     | 9.86E-05 | 1056 |
|          | Corn   |          |                                        |          |      |
| Duodenum | stover | Negative | advanced malignant tumor               | 9.87E-05 | 327  |
|          | Corn   |          |                                        |          |      |
| Duodenum | stover | Negative | arrest in mitosis                      | 1.01E-04 | 42   |
|          | Corn   |          |                                        |          |      |
| Duodenum | stover | Negative | cell movement of cancer cells          | 1.03E-04 | 64   |
|          | Corn   |          |                                        |          |      |
| Duodenum | stover | Negative | cell movement of epithelial cells      | 1.03E-04 | 64   |
|          | Corn   |          |                                        |          |      |
| Duodenum | stover | Negative | formation of filopodia                 | 1.04E-04 | 71   |
|          | Corn   |          |                                        |          |      |
| Duodenum | stover | Negative | G1 phase                               | 1.07E-04 | 156  |
|          | Corn   |          |                                        |          |      |
| Duodenum | stover | Negative | metastasis                             | 1.07E-04 | 295  |
|          | Corn   |          |                                        |          |      |
| Duodenum | stover | Negative | hypertrophy of cells                   | 1.08E-04 | 118  |
|          | Corn   |          |                                        |          |      |
| Duodenum | stover | Negative | morphology of heart ventricle          | 1.16E-04 | 81   |
|          | Corn   |          |                                        |          |      |
| Duodenum | stover | Negative | differentiation of muscle cells        | 1.18E-04 | 115  |
|          | Corn   |          |                                        |          |      |
| Duodenum | stover | Negative | apoptosis of cardiomyocytes            | 1.18E-04 | 78   |
|          | Corn   |          |                                        |          |      |
| Duodenum | stover | Negative | colorectal neoplasia                   | 1.22E-04 | 1572 |
|          | Corn   |          |                                        |          |      |
| Duodenum | stover | Negative | formation of leukocytes                | 1.26E-04 | 68   |
|          | Corn   |          |                                        |          |      |
| Duodenum | stover | Negative | proliferation of endothelial cells     | 1.34E-04 | 126  |
|          | Corn   |          |                                        |          |      |
| Duodenum | stover | Negative | hypertrophy of heart                   | 1.34E-04 | 136  |
|          | Corn   |          |                                        |          |      |
| Duodenum | stover | Negative | attachment of cells                    | 1.35E-04 | 59   |
|          | Corn   |          |                                        |          |      |
| Duodenum | stover | Negative | connective or soft tissue tumor        | 1.39E-04 | 274  |
|          | Corn   |          |                                        |          |      |
| Duodenum | stover | Negative | metastatic colorectal cancer           | 1.40E-04 | 81   |
|          | Corn   |          |                                        |          |      |
| Duodenum | stover | Negative | quantity of lymphatic system component | 1.42E-04 | 151  |
| Duodenum | Corn   | Negative | shape change of tumor cell lines       | 1.42E-04 | 66   |

|          |        |          |                                       |          |      |
|----------|--------|----------|---------------------------------------|----------|------|
|          | stover |          |                                       |          |      |
|          | Corn   |          |                                       |          |      |
| Duodenum | stover | Negative | apoptosis of neurons                  | 1.42E-04 | 173  |
|          | Corn   |          |                                       |          |      |
| Duodenum | stover | Negative | cell death of astrocytes              | 1.42E-04 | 22   |
|          | Corn   |          |                                       |          |      |
| Duodenum | stover | Negative | cell death of hepatoma cell lines     | 1.46E-04 | 72   |
|          | Corn   |          |                                       |          |      |
| Duodenum | stover | Negative | formation of eye                      | 1.46E-04 | 174  |
|          | Corn   |          |                                       |          |      |
| Duodenum | stover | Negative | apoptosis of hepatoma cell lines      | 1.50E-04 | 65   |
|          | Corn   |          |                                       |          |      |
| Duodenum | stover | Negative | tumorigenesis of malignant tumor      | 1.51E-04 | 110  |
|          | Corn   |          |                                       |          |      |
| Duodenum | stover | Negative | generation of lymphocytes             | 1.51E-04 | 61   |
|          | Corn   |          |                                       |          |      |
| Duodenum | stover | Negative | binding of protein binding site       | 1.55E-04 | 117  |
|          | Corn   |          |                                       |          |      |
| Duodenum | stover | Negative | development of sensory organ          | 1.57E-04 | 221  |
|          | Corn   |          |                                       |          |      |
| Duodenum | stover | Negative | polymerization of protein             | 1.58E-04 | 148  |
|          | Corn   |          |                                       |          |      |
| Duodenum | stover | Negative | arrest in mitosis of tumor cell lines | 1.59E-04 | 33   |
|          | Corn   |          |                                       |          |      |
| Duodenum | stover | Negative | cell death of T lymphocytes           | 1.59E-04 | 127  |
|          | Corn   |          |                                       |          |      |
| Duodenum | stover | Negative | differentiation of skin               | 1.63E-04 | 76   |
|          | Corn   |          |                                       |          |      |
| Duodenum | stover | Negative | morphology of reproductive system     | 1.65E-04 | 210  |
|          | Corn   |          |                                       |          |      |
| Duodenum | stover | Negative | expression of protein                 | 1.71E-04 | 136  |
|          | Corn   |          |                                       |          |      |
| Duodenum | stover | Negative | apoptosis of blood cells              | 1.73E-04 | 195  |
|          | Corn   |          |                                       |          |      |
| Duodenum | stover | Negative | differentiation of bone               | 1.75E-04 | 163  |
|          | Corn   |          |                                       |          |      |
| Duodenum | stover | Negative | differentiation of T lymphocytes      | 1.78E-04 | 151  |
|          | Corn   |          |                                       |          |      |
| Duodenum | stover | Negative | intestinal tumor                      | 1.82E-04 | 1574 |
|          | Corn   |          |                                       |          |      |
| Duodenum | stover | Negative | development of reproductive system    | 1.83E-04 | 285  |
|          | Corn   |          |                                       |          |      |
| Duodenum | stover | Negative | cell movement of neutrophils          | 1.84E-04 | 120  |
| Duodenum | Corn   | Negative | secretory pathway                     | 1.84E-04 | 82   |

|          |                |          |                                     |          |      |
|----------|----------------|----------|-------------------------------------|----------|------|
|          | stover<br>Corn |          |                                     |          |      |
| Duodenum | stover<br>Corn | Negative | cycling of centrosome               | 1.86E-04 | 40   |
| Duodenum | stover<br>Corn | Negative | contractility of myocardium         | 1.90E-04 | 30   |
| Duodenum | stover<br>Corn | Negative | morphology of endothelial cells     | 1.90E-04 | 30   |
| Duodenum | stover<br>Corn | Negative | function of heart                   | 1.90E-04 | 95   |
| Duodenum | stover<br>Corn | Negative | uterine serous papillary cancer     | 1.90E-04 | 95   |
| Duodenum | stover<br>Corn | Negative | homing                              | 1.98E-04 | 224  |
| Duodenum | stover<br>Corn | Negative | formation of embryonic tissue       | 1.98E-04 | 119  |
| Duodenum | stover<br>Corn | Negative | abnormal morphology of skeleton     | 1.99E-04 | 110  |
| Duodenum | stover<br>Corn | Negative | female genital tract adenocarcinoma | 2.01E-04 | 1052 |
| Duodenum | stover<br>Corn | Negative | adenoma                             | 2.04E-04 | 216  |
| Duodenum | stover<br>Corn | Negative | cell death of cerebral cortex cells | 2.04E-04 | 94   |
| Duodenum | stover<br>Corn | Negative | pelvic tumor                        | 2.05E-04 | 1575 |
| Duodenum | stover<br>Corn | Negative | pelvic cancer                       | 2.08E-04 | 1565 |
| Duodenum | stover<br>Corn | Negative | morphology of skeleton              | 2.08E-04 | 113  |
| Duodenum | stover<br>Corn | Negative | cell movement of tumor cells        | 2.18E-04 | 77   |
| Duodenum | stover<br>Corn | Negative | cell death of sarcoma cell lines    | 2.20E-04 | 93   |
| Duodenum | stover<br>Corn | Negative | organization of actin cytoskeleton  | 2.20E-04 | 121  |
| Duodenum | stover<br>Corn | Negative | colorectal carcinoma                | 2.22E-04 | 1342 |
| Duodenum | stover<br>Corn | Negative | abnormal morphology of body wall    | 2.24E-04 | 46   |
| Duodenum | stover<br>Corn | Negative | differentiation of bone cells       | 2.25E-04 | 161  |
| Duodenum | stover         | Negative | activation of neuroglia             | 2.30E-04 | 57   |
| Duodenum | Corn           | Negative | central nervous system tumor        | 2.32E-04 | 349  |

|          |        |          |                                            |          |      |
|----------|--------|----------|--------------------------------------------|----------|------|
|          | stover |          |                                            |          |      |
|          | Corn   |          |                                            |          |      |
| Duodenum | stover | Negative | migration of breast cancer cell lines      | 2.39E-04 | 100  |
|          | Corn   |          |                                            |          |      |
| Duodenum | stover | Negative | morphology of lung                         | 2.43E-04 | 78   |
|          | Corn   |          |                                            |          |      |
| Duodenum | stover | Negative | targeting of protein                       | 2.43E-04 | 56   |
|          | Corn   |          |                                            |          |      |
| Duodenum | stover | Negative | shape change of fibroblast cell lines      | 2.47E-04 | 41   |
|          | Corn   |          |                                            |          |      |
| Duodenum | stover | Negative | peripheral arterial disease                | 2.49E-04 | 87   |
|          | Corn   |          |                                            |          |      |
| Duodenum | stover | Negative | accumulation of reactive oxygen species    | 2.49E-04 | 38   |
|          | Corn   |          |                                            |          |      |
| Duodenum | stover | Negative | morphology of endothelial tissue           | 2.49E-04 | 38   |
|          | Corn   |          |                                            |          |      |
| Duodenum | stover | Negative | abnormal morphology of reproductive system | 2.49E-04 | 199  |
|          | Corn   |          |                                            |          |      |
| Duodenum | stover | Negative | transport of protein                       | 2.49E-04 | 121  |
|          | Corn   |          |                                            |          |      |
| Duodenum | stover | Negative | formation of vascular lesion               | 2.50E-04 | 50   |
|          | Corn   |          |                                            |          |      |
| Duodenum | stover | Negative | development of connective tissue cells     | 2.53E-04 | 91   |
|          | Corn   |          |                                            |          |      |
| Duodenum | stover | Negative | abnormal quantity of amino acids           | 2.55E-04 | 29   |
|          | Corn   |          |                                            |          |      |
| Duodenum | stover | Negative | cell death of brain                        | 2.61E-04 | 117  |
|          | Corn   |          |                                            |          |      |
| Duodenum | stover | Negative | hydrolysis of nucleotide                   | 2.66E-04 | 54   |
|          | Corn   |          |                                            |          |      |
| Duodenum | stover | Negative | Ovarian Cancer and Tumors                  | 2.80E-04 | 291  |
|          | Corn   |          |                                            |          |      |
| Duodenum | stover | Negative | apoptosis of cerebral cortex cells         | 2.81E-04 | 47   |
|          | Corn   |          |                                            |          |      |
| Duodenum | stover | Negative | endocytosis                                | 2.86E-04 | 137  |
|          | Corn   |          |                                            |          |      |
| Duodenum | stover | Negative | abnormal morphology of blood vessel        | 2.86E-04 | 107  |
|          | Corn   |          |                                            |          |      |
| Duodenum | stover | Negative | size of cells                              | 2.87E-04 | 169  |
|          | Corn   |          |                                            |          |      |
| Duodenum | stover | Negative | melanoma                                   | 2.88E-04 | 2368 |
|          | Corn   |          |                                            |          |      |
| Duodenum | stover | Negative | arrest in growth of organism               | 2.89E-04 | 70   |
| Duodenum | Corn   | Negative | demyelination                              | 2.92E-04 | 52   |

|          |         |          |                                 |          |      |
|----------|---------|----------|---------------------------------|----------|------|
|          | stover  |          |                                 |          |      |
|          | Corn    |          |                                 |          |      |
| Duodenum | stover  | Negative | Breast Cancer and Tumors        | 2.93E-04 | 571  |
|          | Corn    |          |                                 |          |      |
| Duodenum | stover  | Negative | migration of cancer cells       | 2.94E-04 | 80   |
|          | Corn    |          |                                 |          |      |
| Duodenum | stover  | Negative | function of muscle              | 2.95E-04 | 138  |
|          | Corn    |          |                                 |          |      |
| Duodenum | stover  | Negative | colorectal cancer               | 2.96E-04 | 1545 |
|          | Corn    |          |                                 |          |      |
| Duodenum | stover  | Negative | synthesis of protein            | 3.03E-04 | 175  |
|          | Corn    |          |                                 |          |      |
| Duodenum | stover  | Negative | tubulation of endothelial cells | 3.03E-04 | 51   |
|          | Corn    |          |                                 |          |      |
| Duodenum | stover  | Negative | permeability of cells           | 3.03E-04 | 44   |
|          | Corn    |          |                                 |          |      |
| Duodenum | stover  | Negative | breast cancer                   | 3.08E-04 | 569  |
|          | Alfalfa |          |                                 |          |      |
| Jejunum  | hay     | Positive | organismal death                | 1.35E-32 | 898  |
|          | Alfalfa |          |                                 |          |      |
| Jejunum  | hay     | Positive | morbidity or mortality          | 2.38E-32 | 906  |
|          | Alfalfa |          |                                 |          |      |
| Jejunum  | hay     | Positive | malignant solid tumor           | 4.12E-32 | 3249 |
|          | Alfalfa |          |                                 |          |      |
| Jejunum  | hay     | Positive | cancer                          | 8.39E-32 | 3282 |
|          | Alfalfa |          |                                 |          |      |
| Jejunum  | hay     | Positive | proliferation of cells          | 1.08E-28 | 1271 |
|          | Alfalfa |          |                                 |          |      |
| Jejunum  | hay     | Positive | organization of cytoplasm       | 1.56E-24 | 590  |
|          | Alfalfa |          |                                 |          |      |
| Jejunum  | hay     | Positive | cell death                      | 9.09E-24 | 1140 |
|          | Alfalfa |          |                                 |          |      |
| Jejunum  | hay     | Positive | necrosis                        | 2.88E-21 | 898  |
|          | Alfalfa |          |                                 |          |      |
| Jejunum  | hay     | Positive | organization of cytoskeleton    | 2.00E-20 | 529  |
|          | Alfalfa |          |                                 |          |      |
| Jejunum  | hay     | Positive | morphology of cells             | 1.47E-19 | 698  |
|          | Alfalfa |          |                                 |          |      |
| Jejunum  | hay     | Positive | epithelial cancer               | 2.05E-19 | 2664 |
|          | Alfalfa |          |                                 |          |      |
| Jejunum  | hay     | Positive | neoplasia of epithelial tissue  | 8.72E-19 | 2683 |
|          | Alfalfa |          |                                 |          |      |
| Jejunum  | hay     | Positive | tumorigenesis of tissue         | 1.46E-18 | 2722 |
| Jejunum  | Alfalfa | Positive | apoptosis                       | 3.41E-18 | 902  |

|         |         |          |                                     |          |      |
|---------|---------|----------|-------------------------------------|----------|------|
|         | hay     |          |                                     |          |      |
|         | Alfalfa |          |                                     |          |      |
| Jejunum | hay     | Positive | abdominal neoplasm                  | 2.17E-17 | 2655 |
|         | Alfalfa |          |                                     |          |      |
| Jejunum | hay     | Positive | transport of molecule               | 4.55E-17 | 582  |
|         | Alfalfa |          |                                     |          |      |
| Jejunum | hay     | Positive | microtubule dynamics                | 5.95E-17 | 446  |
|         | Alfalfa |          |                                     |          |      |
| Jejunum | hay     | Positive | abdominal cancer                    | 1.32E-16 | 2621 |
|         | Alfalfa |          |                                     |          |      |
| Jejunum | hay     | Positive | cellular homeostasis                | 4.21E-16 | 549  |
|         | Alfalfa |          |                                     |          |      |
| Jejunum | hay     | Positive | cell movement                       | 1.59E-15 | 732  |
|         | Alfalfa |          |                                     |          |      |
| Jejunum | hay     | Positive | cell death of tumor cell lines      | 3.13E-15 | 546  |
|         | Alfalfa |          |                                     |          |      |
| Jejunum | hay     | Positive | expression of RNA                   | 1.70E-14 | 732  |
|         | Alfalfa |          |                                     |          |      |
| Jejunum | hay     | Positive | digestive system cancer             | 3.38E-14 | 2275 |
|         | Alfalfa |          |                                     |          |      |
| Jejunum | hay     | Positive | differentiation of cells            | 6.09E-14 | 760  |
|         | Alfalfa |          |                                     |          |      |
| Jejunum | hay     | Positive | migration of cells                  | 8.82E-14 | 654  |
|         | Alfalfa |          |                                     |          |      |
| Jejunum | hay     | Positive | cell movement of tumor cell lines   | 1.41E-13 | 324  |
|         | Alfalfa |          |                                     |          |      |
| Jejunum | hay     | Positive | digestive organ tumor               | 1.67E-13 | 2289 |
|         | Alfalfa |          |                                     |          |      |
| Jejunum | hay     | Positive | formation of cellular protrusions   | 3.53E-13 | 339  |
|         | Alfalfa |          |                                     |          |      |
| Jejunum | hay     | Positive | transcription                       | 5.55E-13 | 677  |
|         | Alfalfa |          |                                     |          |      |
| Jejunum | hay     | Positive | apoptosis of tumor cell lines       | 6.51E-13 | 436  |
|         | Alfalfa |          |                                     |          |      |
| Jejunum | hay     | Positive | quantity of cells                   | 1.40E-12 | 606  |
|         | Alfalfa |          |                                     |          |      |
| Jejunum | hay     | Positive | morphology of cardiovascular system | 2.07E-12 | 242  |
|         | Alfalfa |          |                                     |          |      |
| Jejunum | hay     | Positive | development of body trunk           | 3.21E-12 | 403  |
|         | Alfalfa |          |                                     |          |      |
| Jejunum | hay     | Positive | transcription of RNA                | 6.61E-12 | 629  |
|         | Alfalfa |          |                                     |          |      |
| Jejunum | hay     | Positive | angiogenesis                        | 9.48E-12 | 334  |
| Jejunum | Alfalfa | Positive | vasculogenesis                      | 1.26E-11 | 278  |



|         |         |          |                                              |          |     |
|---------|---------|----------|----------------------------------------------|----------|-----|
|         | hay     |          |                                              |          |     |
|         | Alfalfa |          |                                              |          |     |
| Jejunum | hay     | Positive | Movement Disorders                           | 3.18E-11 | 380 |
|         | Alfalfa |          |                                              |          |     |
| Jejunum | hay     | Positive | Growth Failure                               | 4.12E-11 | 230 |
|         | Alfalfa |          |                                              |          |     |
| Jejunum | hay     | Positive | organization of organelle                    | 8.01E-11 | 209 |
|         | Alfalfa |          |                                              |          |     |
| Jejunum | hay     | Positive | morphology of body cavity                    | 9.00E-11 | 420 |
|         | Alfalfa |          |                                              |          |     |
| Jejunum | hay     | Positive | abnormal morphology of cardiovascular system | 1.06E-10 | 218 |
|         | Alfalfa |          |                                              |          |     |
| Jejunum | hay     | Positive | size of body                                 | 1.11E-10 | 311 |
|         | Alfalfa |          |                                              |          |     |
| Jejunum | hay     | Positive | abnormal morphology of thoracic cavity       | 1.28E-10 | 224 |
|         | Alfalfa |          |                                              |          |     |
| Jejunum | hay     | Positive | cell death of connective tissue cells        | 1.62E-10 | 229 |
|         | Alfalfa |          |                                              |          |     |
| Jejunum | hay     | Positive | migration of tumor cell lines                | 1.94E-10 | 263 |
|         | Alfalfa |          |                                              |          |     |
| Jejunum | hay     | Positive | development of vasculature                   | 2.44E-10 | 166 |
|         | Alfalfa |          |                                              |          |     |
| Jejunum | hay     | Positive | abnormal morphology of cells                 | 2.56E-10 | 439 |
|         | Alfalfa |          |                                              |          |     |
| Jejunum | hay     | Positive | abnormal morphology of body cavity           | 3.98E-10 | 400 |
|         | Alfalfa |          |                                              |          |     |
| Jejunum | hay     | Positive | neurological signs                           | 5.01E-10 | 243 |
|         | Alfalfa |          |                                              |          |     |
| Jejunum | hay     | Positive | dyskinesia                                   | 7.17E-10 | 231 |
|         | Alfalfa |          |                                              |          |     |
| Jejunum | hay     | Positive | cell survival                                | 8.71E-10 | 475 |
|         | Alfalfa |          |                                              |          |     |
| Jejunum | hay     | Positive | development of lymphatic system              | 1.62E-09 | 142 |
|         | Alfalfa |          |                                              |          |     |
| Jejunum | hay     | Positive | disorder of basal ganglia                    | 2.03E-09 | 278 |
|         | Alfalfa |          |                                              |          |     |
| Jejunum | hay     | Positive | chorea                                       | 3.40E-09 | 215 |
|         | Alfalfa |          |                                              |          |     |
| Jejunum | hay     | Positive | Bleeding                                     | 3.40E-09 | 164 |
|         | Alfalfa |          |                                              |          |     |
| Jejunum | hay     | Positive | neuromuscular disease                        | 3.42E-09 | 314 |
|         | Alfalfa |          |                                              |          |     |
| Jejunum | hay     | Positive | concentration of lipid                       | 3.44E-09 | 291 |
| Jejunum | Alfalfa | Positive | Huntington's Disease                         | 3.80E-09 | 214 |

|         |         |          |                                           |          |     |
|---------|---------|----------|-------------------------------------------|----------|-----|
|         | hay     |          |                                           |          |     |
|         | Alfalfa |          |                                           |          |     |
| Jejunum | hay     | Positive | quantity of blood cells                   | 3.83E-09 | 359 |
|         | Alfalfa |          |                                           |          |     |
| Jejunum | hay     | Positive | quantity of leukocytes                    | 3.89E-09 | 324 |
|         | Alfalfa |          |                                           |          |     |
| Jejunum | hay     | Positive | behavior                                  | 4.02E-09 | 347 |
|         | Alfalfa |          |                                           |          |     |
| Jejunum | hay     | Positive | formation of cytoskeleton                 | 4.78E-09 | 147 |
|         | Alfalfa |          |                                           |          |     |
| Jejunum | hay     | Positive | development of lymphatic system component | 4.87E-09 | 124 |
|         | Alfalfa |          |                                           |          |     |
| Jejunum | hay     | Positive | development of blood cells                | 4.87E-09 | 239 |
|         | Alfalfa |          |                                           |          |     |
| Jejunum | hay     | Positive | invasion of cells                         | 7.02E-09 | 308 |
|         | Alfalfa |          |                                           |          |     |
| Jejunum | hay     | Positive | proliferation of tumor cell lines         | 7.18E-09 | 516 |
|         | Alfalfa |          |                                           |          |     |
| Jejunum | hay     | Positive | Viral Infection                           | 7.94E-09 | 535 |
|         | Alfalfa |          |                                           |          |     |
| Jejunum | hay     | Positive | growth of organism                        | 7.94E-09 | 297 |
|         | Alfalfa |          |                                           |          |     |
| Jejunum | hay     | Positive | development of leukocytes                 | 8.33E-09 | 217 |
|         | Alfalfa |          |                                           |          |     |
| Jejunum | hay     | Positive | development of cytoplasm                  | 8.48E-09 | 175 |
|         | Alfalfa |          |                                           |          |     |
| Jejunum | hay     | Positive | cell viability                            | 1.00E-08 | 440 |
|         | Alfalfa |          |                                           |          |     |
| Jejunum | hay     | Positive | growth of embryo                          | 1.54E-08 | 179 |
|         | Alfalfa |          |                                           |          |     |
| Jejunum | hay     | Positive | quantity of lymphatic system component    | 2.40E-08 | 145 |
|         | Alfalfa |          |                                           |          |     |
| Jejunum | hay     | Positive | size of embryo                            | 4.47E-08 | 137 |
|         | Alfalfa |          |                                           |          |     |
| Jejunum | hay     | Positive | autosomal recessive disease               | 4.47E-08 | 320 |
|         | Alfalfa |          |                                           |          |     |
| Jejunum | hay     | Positive | growth of lesion                          | 4.47E-08 | 281 |
|         | Alfalfa |          |                                           |          |     |
| Jejunum | hay     | Positive | formation of lymphatic system component   | 5.02E-08 | 115 |
|         | Alfalfa |          |                                           |          |     |
| Jejunum | hay     | Positive | fibrogenesis                              | 5.59E-08 | 155 |
|         | Alfalfa |          |                                           |          |     |
| Jejunum | hay     | Positive | growth of tumor                           | 5.62E-08 | 280 |
| Jejunum | Alfalfa | Positive | morphology of heart                       | 5.73E-08 | 153 |

|         |         |          |                                       |          |     |
|---------|---------|----------|---------------------------------------|----------|-----|
|         | hay     |          |                                       |          |     |
|         | Alfalfa |          |                                       |          |     |
| Jejunum | hay     | Positive | transcription of DNA                  | 5.73E-08 | 506 |
|         | Alfalfa |          |                                       |          |     |
| Jejunum | hay     | Positive | quantity of lymphoid organ            | 5.76E-08 | 120 |
|         | Alfalfa |          |                                       |          |     |
| Jejunum | hay     | Positive | formation of muscle                   | 6.01E-08 | 150 |
|         | Alfalfa |          |                                       |          |     |
| Jejunum | hay     | Positive | protein kinase cascade                | 6.49E-08 | 158 |
|         | Alfalfa |          |                                       |          |     |
| Jejunum | hay     | Positive | formation of filaments                | 6.89E-08 | 150 |
|         | Alfalfa |          |                                       |          |     |
| Jejunum | hay     | Positive | development of connective tissue      | 7.17E-08 | 141 |
|         | Alfalfa |          |                                       |          |     |
| Jejunum | hay     | Positive | development of lymphocytes            | 8.48E-08 | 201 |
|         | Alfalfa |          |                                       |          |     |
| Jejunum | hay     | Positive | development of mononuclear leukocytes | 1.04E-07 | 202 |
|         | Alfalfa |          |                                       |          |     |
| Jejunum | hay     | Positive | development of hematopoietic system   | 1.21E-07 | 99  |
|         | Alfalfa |          |                                       |          |     |
| Jejunum | hay     | Positive | cell cycle progression                | 1.29E-07 | 356 |
|         | Alfalfa |          |                                       |          |     |
| Jejunum | hay     | Positive | cell movement of endothelial cells    | 1.53E-07 | 134 |
|         | Alfalfa |          |                                       |          |     |
| Jejunum | hay     | Positive | phosphorylation of protein            | 1.76E-07 | 258 |
|         | Alfalfa |          |                                       |          |     |
| Jejunum | hay     | Positive | homeostasis of leukocytes             | 1.79E-07 | 200 |
|         | Alfalfa |          |                                       |          |     |
| Jejunum | hay     | Positive | migration of endothelial cells        | 2.06E-07 | 125 |
|         | Alfalfa |          |                                       |          |     |
| Jejunum | hay     | Positive | colony formation of cells             | 2.31E-07 | 179 |
|         | Alfalfa |          |                                       |          |     |
| Jejunum | hay     | Positive | formation of T lymphocytes            | 2.55E-07 | 52  |
|         | Alfalfa |          |                                       |          |     |
| Jejunum | hay     | Positive | T cell development                    | 2.97E-07 | 182 |
|         | Alfalfa |          |                                       |          |     |
| Jejunum | hay     | Positive | colony formation                      | 3.02E-07 | 193 |
|         | Alfalfa |          |                                       |          |     |
| Jejunum | hay     | Positive | formation of cells                    | 3.16E-07 | 334 |
|         | Alfalfa |          |                                       |          |     |
| Jejunum | hay     | Positive | concentration of fatty acid           | 3.20E-07 | 108 |
|         | Alfalfa |          |                                       |          |     |
| Jejunum | hay     | Positive | function of leukocytes                | 3.33E-07 | 193 |
| Jejunum | Alfalfa | Positive | formation of lymphocytes              | 4.28E-07 | 55  |

|         |         |          |                                              |          |     |
|---------|---------|----------|----------------------------------------------|----------|-----|
|         | hay     |          |                                              |          |     |
|         | Alfalfa |          |                                              |          |     |
| Jejunum | hay     | Positive | Lymphocyte homeostasis                       | 4.33E-07 | 195 |
|         | Alfalfa |          |                                              |          |     |
| Jejunum | hay     | Positive | cell viability of tumor cell lines           | 5.56E-07 | 269 |
|         | Alfalfa |          |                                              |          |     |
| Jejunum | hay     | Positive | differentiation of blood cells               | 6.47E-07 | 289 |
|         | Alfalfa |          |                                              |          |     |
| Jejunum | hay     | Positive | formation of lymphoid organ                  | 6.47E-07 | 102 |
|         | Alfalfa |          |                                              |          |     |
| Jejunum | hay     | Positive | development of epithelial tissue             | 6.63E-07 | 185 |
|         | Alfalfa |          |                                              |          |     |
| Jejunum | hay     | Positive | migration of blood cells                     | 6.68E-07 | 298 |
|         | Alfalfa |          |                                              |          |     |
| Jejunum | hay     | Positive | formation of leukocytes                      | 6.68E-07 | 66  |
|         | Alfalfa |          |                                              |          |     |
| Jejunum | hay     | Positive | activation of DNA endogenous promoter        | 6.68E-07 | 401 |
|         | Alfalfa |          |                                              |          |     |
| Jejunum | hay     | Positive | congenital anomaly of musculoskeletal system | 6.68E-07 | 255 |
|         | Alfalfa |          |                                              |          |     |
| Jejunum | hay     | Positive | morphology of vessel                         | 6.68E-07 | 116 |
|         | Alfalfa |          |                                              |          |     |
| Jejunum | hay     | Positive | abnormal morphology of heart                 | 8.08E-07 | 141 |
|         | Alfalfa |          |                                              |          |     |
| Jejunum | hay     | Positive | leukocyte migration                          | 8.08E-07 | 297 |
|         | Alfalfa |          |                                              |          |     |
| Jejunum | hay     | Positive | accumulation of lipid                        | 8.08E-07 | 113 |
|         | Alfalfa |          |                                              |          |     |
| Jejunum | hay     | Positive | proliferation of connective tissue cells     | 8.20E-07 | 209 |
|         | Alfalfa |          |                                              |          |     |
| Jejunum | hay     | Positive | formation of mononuclear leukocytes          | 8.24E-07 | 56  |
|         | Alfalfa |          |                                              |          |     |
| Jejunum | hay     | Positive | formation of thymocytes                      | 8.31E-07 | 47  |
|         | Alfalfa |          |                                              |          |     |
| Jejunum | hay     | Positive | formation of thymus gland                    | 8.78E-07 | 67  |
|         | Alfalfa |          |                                              |          |     |
| Jejunum | hay     | Positive | T cell homeostasis                           | 9.04E-07 | 184 |
|         | Alfalfa |          |                                              |          |     |
| Jejunum | hay     | Positive | differentiation of leukocytes                | 9.15E-07 | 234 |
|         | Alfalfa |          |                                              |          |     |
| Jejunum | hay     | Positive | neuritogenesis                               | 1.20E-06 | 205 |
|         | Alfalfa |          |                                              |          |     |
| Jejunum | hay     | Positive | apoptosis of fibroblast cell lines           | 1.26E-06 | 122 |
| Jejunum | Alfalfa | Positive | function of blood cells                      | 1.26E-06 | 206 |

|         |         |          |                                               |          |     |
|---------|---------|----------|-----------------------------------------------|----------|-----|
|         | hay     |          |                                               |          |     |
|         | Alfalfa |          |                                               |          |     |
| Jejunum | hay     | Positive | learning                                      | 1.63E-06 | 151 |
|         | Alfalfa |          |                                               |          |     |
| Jejunum | hay     | Positive | proliferation of neuronal cells               | 1.70E-06 | 202 |
|         | Alfalfa |          |                                               |          |     |
| Jejunum | hay     | Positive | quantity of thymocytes                        | 1.99E-06 | 89  |
|         | Alfalfa |          |                                               |          |     |
| Jejunum | hay     | Positive | invasion of tumor cell lines                  | 2.02E-06 | 230 |
|         | Alfalfa |          |                                               |          |     |
| Jejunum | hay     | Positive | quantity of mononuclear leukocytes            | 2.07E-06 | 252 |
|         | Alfalfa |          |                                               |          |     |
| Jejunum | hay     | Positive | cell movement of myeloid cells                | 2.11E-06 | 190 |
|         | Alfalfa |          |                                               |          |     |
| Jejunum | hay     | Positive | development of hematopoietic progenitor cells | 2.19E-06 | 76  |
|         | Alfalfa |          |                                               |          |     |
| Jejunum | hay     | Positive | growth of connective tissue                   | 2.30E-06 | 223 |
|         | Alfalfa |          |                                               |          |     |
| Jejunum | hay     | Positive | perinatal death                               | 2.46E-06 | 207 |
|         | Alfalfa |          |                                               |          |     |
| Jejunum | hay     | Positive | cognition                                     | 2.48E-06 | 162 |
|         | Alfalfa |          |                                               |          |     |
| Jejunum | hay     | Positive | autophagy                                     | 2.63E-06 | 136 |
|         | Alfalfa |          |                                               |          |     |
| Jejunum | hay     | Positive | cell death of fibroblast cell lines           | 2.75E-06 | 153 |
|         | Alfalfa |          |                                               |          |     |
| Jejunum | hay     | Positive | quantity of hematopoietic cells               | 2.88E-06 | 158 |
|         | Alfalfa |          |                                               |          |     |
| Jejunum | hay     | Positive | abnormal morphology of abdomen                | 2.93E-06 | 295 |
|         | Alfalfa |          |                                               |          |     |
| Jejunum | hay     | Positive | metabolism of carbohydrate                    | 2.99E-06 | 215 |
|         | Alfalfa |          |                                               |          |     |
| Jejunum | hay     | Positive | mitosis                                       | 3.18E-06 | 175 |
|         | Alfalfa |          |                                               |          |     |
| Jejunum | hay     | Positive | formation of plasma membrane projections      | 3.22E-06 | 207 |
|         | Alfalfa |          |                                               |          |     |
| Jejunum | hay     | Positive | quantity of carbohydrate                      | 3.22E-06 | 182 |
|         | Alfalfa |          |                                               |          |     |
| Jejunum | hay     | Positive | quantity of lymphocytes                       | 3.23E-06 | 242 |
|         | Alfalfa |          |                                               |          |     |
| Jejunum | hay     | Positive | ion homeostasis of cells                      | 3.52E-06 | 194 |
|         | Alfalfa |          |                                               |          |     |
| Jejunum | hay     | Positive | quantity of hematopoietic progenitor cells    | 3.70E-06 | 157 |
| Jejunum | Alfalfa | Positive | formation of actin stress fibers              | 3.84E-06 | 91  |

|         |         |          |                                          |          |     |
|---------|---------|----------|------------------------------------------|----------|-----|
|         | hay     |          |                                          |          |     |
|         | Alfalfa |          |                                          |          |     |
| Jejunum | hay     | Positive | formation of blood cells                 | 3.93E-06 | 77  |
|         | Alfalfa |          |                                          |          |     |
| Jejunum | hay     | Positive | morphology of blood vessel               | 4.03E-06 | 105 |
|         | Alfalfa |          |                                          |          |     |
| Jejunum | hay     | Positive | cell transformation                      | 4.03E-06 | 163 |
|         | Alfalfa |          |                                          |          |     |
| Jejunum | hay     | Positive | morphology of connective tissue          | 4.03E-06 | 163 |
|         | Alfalfa |          |                                          |          |     |
| Jejunum | hay     | Positive | activation of cells                      | 4.19E-06 | 325 |
|         | Alfalfa |          |                                          |          |     |
| Jejunum | hay     | Positive | homing of cells                          | 4.19E-06 | 194 |
|         | Alfalfa |          |                                          |          |     |
| Jejunum | hay     | Positive | mitosis of tumor cell lines              | 4.41E-06 | 55  |
|         | Alfalfa |          |                                          |          |     |
| Jejunum | hay     | Positive | degeneration of cells                    | 4.45E-06 | 125 |
|         | Alfalfa |          |                                          |          |     |
| Jejunum | hay     | Positive | homing                                   | 4.45E-06 | 199 |
|         | Alfalfa |          |                                          |          |     |
| Jejunum | hay     | Positive | cell death of cervical cancer cell lines | 4.81E-06 | 127 |
|         | Alfalfa |          |                                          |          |     |
| Jejunum | hay     | Positive | synthesis of carbohydrate                | 5.04E-06 | 151 |
|         | Alfalfa |          |                                          |          |     |
| Jejunum | hay     | Positive | inflammatory response                    | 5.13E-06 | 263 |
|         | Alfalfa |          |                                          |          |     |
| Jejunum | hay     | Positive | development of cardiovascular tissue     | 5.13E-06 | 133 |
|         | Alfalfa |          |                                          |          |     |
| Jejunum | hay     | Positive | growth of muscle tissue                  | 5.67E-06 | 134 |
|         | Alfalfa |          |                                          |          |     |
| Jejunum | hay     | Positive | cell movement of leukocytes              | 5.76E-06 | 259 |
|         | Alfalfa |          |                                          |          |     |
| Jejunum | hay     | Positive | abnormal morphology of embryonic tissue  | 6.03E-06 | 190 |
|         | Alfalfa |          |                                          |          |     |
| Jejunum | hay     | Positive | cell spreading                           | 7.60E-06 | 102 |
|         | Alfalfa |          |                                          |          |     |
| Jejunum | hay     | Positive | morphology of head                       | 7.60E-06 | 292 |
|         | Alfalfa |          |                                          |          |     |
| Jejunum | hay     | Positive | development of neurons                   | 7.81E-06 | 263 |
|         | Alfalfa |          |                                          |          |     |
| Jejunum | hay     | Positive | proliferation of blood cells             | 9.85E-06 | 281 |
|         | Alfalfa |          |                                          |          |     |
| Jejunum | hay     | Positive | growth of embryonic tissue               | 1.06E-05 | 101 |
| Jejunum | Alfalfa | Positive | uptake of monosaccharide                 | 1.10E-05 | 99  |

|         |         |          |                                             |          |      |
|---------|---------|----------|---------------------------------------------|----------|------|
|         | hay     |          |                                             |          |      |
|         | Alfalfa |          |                                             |          |      |
| Jejunum | hay     | Positive | sprouting                                   | 1.10E-05 | 137  |
|         | Alfalfa |          |                                             |          |      |
| Jejunum | hay     | Positive | synthesis of lipid                          | 1.11E-05 | 241  |
|         | Alfalfa |          |                                             |          |      |
| Jejunum | hay     | Positive | proliferation of muscle cells               | 1.15E-05 | 132  |
|         | Alfalfa |          |                                             |          |      |
| Jejunum | hay     | Positive | formation of hematopoietic progenitor cells | 1.17E-05 | 52   |
|         | Alfalfa |          |                                             |          |      |
| Jejunum | hay     | Positive | immune response of cells                    | 1.38E-05 | 196  |
|         | Alfalfa |          |                                             |          |      |
| Jejunum | hay     | Positive | cell death of muscle                        | 1.38E-05 | 123  |
|         | Alfalfa |          |                                             |          |      |
| Jejunum | hay     | Positive | development of endothelial tissue           | 1.40E-05 | 130  |
|         | Alfalfa |          |                                             |          |      |
| Jejunum | hay     | Positive | proliferation of embryonic cell lines       | 1.44E-05 | 62   |
|         | Alfalfa |          |                                             |          |      |
| Jejunum | hay     | Positive | cell death of muscle cells                  | 1.51E-05 | 120  |
|         | Alfalfa |          |                                             |          |      |
| Jejunum | hay     | Positive | formation of actin filaments                | 1.53E-05 | 110  |
|         | Alfalfa |          |                                             |          |      |
| Jejunum | hay     | Positive | differentiation of T lymphocytes            | 1.54E-05 | 134  |
|         | Alfalfa |          |                                             |          |      |
| Jejunum | hay     | Positive | autosomal dominant disease                  | 1.56E-05 | 216  |
|         | Alfalfa |          |                                             |          |      |
| Jejunum | hay     | Positive | adenocarcinoma                              | 1.57E-05 | 1924 |
|         | Alfalfa |          |                                             |          |      |
| Jejunum | hay     | Positive | seizure disorder                            | 1.63E-05 | 163  |
|         | Alfalfa |          |                                             |          |      |
| Jejunum | hay     | Positive | morphology of respiratory system            | 1.63E-05 | 112  |
|         | Alfalfa |          |                                             |          |      |
| Jejunum | hay     | Positive | cell movement of granulocytes               | 1.69E-05 | 131  |
|         | Alfalfa |          |                                             |          |      |
| Jejunum | hay     | Positive | abnormal morphology of blood vessel         | 1.72E-05 | 97   |
|         | Alfalfa |          |                                             |          |      |
| Jejunum | hay     | Positive | necrosis of muscle                          | 1.78E-05 | 122  |
|         | Alfalfa |          |                                             |          |      |
| Jejunum | hay     | Positive | abnormal morphology of head                 | 1.93E-05 | 276  |
|         | Alfalfa |          |                                             |          |      |
| Jejunum | hay     | Positive | seizures                                    | 1.93E-05 | 140  |
|         | Alfalfa |          |                                             |          |      |
| Jejunum | hay     | Positive | uptake of carbohydrate                      | 1.93E-05 | 105  |
| Jejunum | Alfalfa | Positive | differentiation of connective tissue cells  | 2.07E-05 | 217  |

|         |         |          |                                               |          |      |
|---------|---------|----------|-----------------------------------------------|----------|------|
|         | hay     |          |                                               |          |      |
|         | Alfalfa |          |                                               |          |      |
| Jejunum | hay     | Positive | cell movement of neutrophils                  | 2.12E-05 | 107  |
|         | Alfalfa |          |                                               |          |      |
| Jejunum | hay     | Positive | abnormal morphology of respiratory system     | 2.24E-05 | 110  |
|         | Alfalfa |          |                                               |          |      |
| Jejunum | hay     | Positive | chemotaxis                                    | 2.32E-05 | 186  |
|         | Alfalfa |          |                                               |          |      |
| Jejunum | hay     | Positive | proliferation of smooth muscle cells          | 2.32E-05 | 103  |
|         | Alfalfa |          |                                               |          |      |
| Jejunum | hay     | Positive | endothelial cell development                  | 2.32E-05 | 125  |
|         | Alfalfa |          |                                               |          |      |
| Jejunum | hay     | Positive | cell death of epithelial cell lines           | 2.36E-05 | 102  |
|         | Alfalfa |          |                                               |          |      |
| Jejunum | hay     | Positive | quantity of connective tissue                 | 2.46E-05 | 204  |
|         | Alfalfa |          |                                               |          |      |
| Jejunum | hay     | Positive | proliferation of embryonic cells              | 2.51E-05 | 91   |
|         | Alfalfa |          |                                               |          |      |
| Jejunum | hay     | Positive | growth of epithelial tissue                   | 2.57E-05 | 228  |
|         | Alfalfa |          |                                               |          |      |
| Jejunum | hay     | Positive | chemotaxis of cells                           | 2.74E-05 | 180  |
|         | Alfalfa |          |                                               |          |      |
| Jejunum | hay     | Positive | proliferation of endothelial cells            | 2.80E-05 | 111  |
|         | Alfalfa |          |                                               |          |      |
| Jejunum | hay     | Positive | apoptosis of connective tissue cells          | 2.80E-05 | 106  |
|         | Alfalfa |          |                                               |          |      |
| Jejunum | hay     | Positive | degeneration of nervous system                | 3.04E-05 | 103  |
|         | Alfalfa |          |                                               |          |      |
| Jejunum | hay     | Positive | gastrointestinal carcinoma                    | 3.14E-05 | 1357 |
|         | Alfalfa |          |                                               |          |      |
| Jejunum | hay     | Positive | mass of organism                              | 3.31E-05 | 118  |
|         | Alfalfa |          |                                               |          |      |
| Jejunum | hay     | Positive | epileptic seizure                             | 3.34E-05 | 64   |
|         | Alfalfa |          |                                               |          |      |
| Jejunum | hay     | Positive | morphogenesis of neurons                      | 3.47E-05 | 147  |
|         | Alfalfa |          |                                               |          |      |
| Jejunum | hay     | Positive | abdominal adenocarcinoma                      | 3.47E-05 | 1750 |
|         | Alfalfa |          |                                               |          |      |
| Jejunum | hay     | Positive | gastrointestinal tract cancer                 | 3.93E-05 | 1507 |
|         | Alfalfa |          |                                               |          |      |
| Jejunum | hay     | Positive | cell movement of phagocytes                   | 4.00E-05 | 186  |
|         | Alfalfa |          |                                               |          |      |
| Jejunum | hay     | Positive | organization of actin cytoskeleton            | 4.08E-05 | 107  |
| Jejunum | Alfalfa | Positive | proliferation of central nervous system cells | 4.08E-05 | 58   |



|         |         |          |                                              |          |     |
|---------|---------|----------|----------------------------------------------|----------|-----|
|         | hay     |          |                                              |          |     |
|         | Alfalfa |          |                                              |          |     |
| Jejunum | hay     | Positive | benign neoplasia                             | 4.16E-05 | 302 |
|         | Alfalfa |          |                                              |          |     |
| Jejunum | hay     | Positive | small GTPase mediated signal transduction    | 4.40E-05 | 69  |
|         | Alfalfa |          |                                              |          |     |
| Jejunum | hay     | Positive | apoptosis of epithelial cell lines           | 4.40E-05 | 82  |
|         | Alfalfa |          |                                              |          |     |
| Jejunum | hay     | Positive | apoptosis of B-lymphocyte derived cell lines | 4.75E-05 | 49  |
|         | Alfalfa |          |                                              |          |     |
| Jejunum | hay     | Positive | skin abnormality                             | 5.15E-05 | 83  |
|         | Alfalfa |          |                                              |          |     |
| Jejunum | hay     | Positive | ubiquitination                               | 5.43E-05 | 118 |
|         | Alfalfa |          |                                              |          |     |
| Jejunum | hay     | Positive | differentiation of lymphocytes               | 5.48E-05 | 169 |
|         | Alfalfa |          |                                              |          |     |
| Jejunum | hay     | Positive | infection by Retroviridae                    | 5.69E-05 | 238 |
|         | Alfalfa |          |                                              |          |     |
| Jejunum | hay     | Positive | proliferation of fibroblasts                 | 5.73E-05 | 123 |
|         | Alfalfa |          |                                              |          |     |
| Jejunum | hay     | Positive | dysgenesis                                   | 5.74E-05 | 182 |
|         | Alfalfa |          |                                              |          |     |
| Jejunum | hay     | Positive | differentiation of connective tissue         | 6.16E-05 | 241 |
|         | Alfalfa |          |                                              |          |     |
| Jejunum | hay     | Positive | fatty acid metabolism                        | 6.16E-05 | 201 |
|         | Alfalfa |          |                                              |          |     |
| Jejunum | hay     | Positive | engulfment of cells                          | 6.38E-05 | 140 |
|         | Alfalfa |          |                                              |          |     |
| Jejunum | hay     | Positive | angiogenesis of lesion                       | 6.38E-05 | 50  |
|         | Alfalfa |          |                                              |          |     |
| Jejunum | hay     | Positive | Hypertrophy                                  | 6.39E-05 | 161 |
|         | Alfalfa |          |                                              |          |     |
| Jejunum | hay     | Positive | ubiquitination of protein                    | 6.45E-05 | 116 |
|         | Alfalfa |          |                                              |          |     |
| Jejunum | hay     | Positive | branching of cells                           | 6.60E-05 | 128 |
|         | Alfalfa |          |                                              |          |     |
| Jejunum | hay     | Positive | apoptosis of pheochromocytoma cell lines     | 6.83E-05 | 38  |
|         | Alfalfa |          |                                              |          |     |
| Jejunum | hay     | Positive | quantity of double-positive thymocyte        | 6.92E-05 | 45  |
|         | Alfalfa |          |                                              |          |     |
| Jejunum | hay     | Positive | Organ Degeneration                           | 7.12E-05 | 167 |
|         | Alfalfa |          |                                              |          |     |
| Jejunum | hay     | Positive | Hypertension                                 | 7.21E-05 | 213 |
| Jejunum | Alfalfa | Positive | quantity of T lymphocytes                    | 7.44E-05 | 180 |

|         |         |          |                                                 |          |      |
|---------|---------|----------|-------------------------------------------------|----------|------|
|         | hay     |          |                                                 |          |      |
|         | Alfalfa |          |                                                 |          |      |
| Jejunum | hay     | Positive | cell death of B-lymphocyte derived cell lines   | 7.92E-05 | 50   |
|         | Alfalfa |          |                                                 |          |      |
| Jejunum | hay     | Positive | peripheral vascular disease                     | 8.18E-05 | 131  |
|         | Alfalfa |          |                                                 |          |      |
| Jejunum | hay     | Positive | cell viability of cervical cancer cell lines    | 8.32E-05 | 80   |
|         | Alfalfa |          |                                                 |          |      |
| Jejunum | hay     | Positive | morphogenesis of neurites                       | 8.44E-05 | 143  |
|         | Alfalfa |          |                                                 |          |      |
| Jejunum | hay     | Positive | transmembrane potential of mitochondria         | 8.45E-05 | 78   |
|         | Alfalfa |          |                                                 |          |      |
| Jejunum | hay     | Positive | cell death of fibroblasts                       | 8.45E-05 | 94   |
|         | Alfalfa |          |                                                 |          |      |
| Jejunum | hay     | Positive | proliferation of hematopoietic progenitor cells | 8.55E-05 | 87   |
|         | Alfalfa |          |                                                 |          |      |
| Jejunum | hay     | Positive | morphology of blood cells                       | 8.68E-05 | 142  |
|         | Alfalfa |          |                                                 |          |      |
| Jejunum | hay     | Positive | proliferation of immune cells                   | 8.68E-05 | 259  |
|         | Alfalfa |          |                                                 |          |      |
| Jejunum | hay     | Positive | mitosis of cervical cancer cell lines           | 8.68E-05 | 40   |
|         | Alfalfa |          |                                                 |          |      |
| Jejunum | hay     | Positive | transactivation                                 | 8.68E-05 | 193  |
|         | Alfalfa |          |                                                 |          |      |
| Jejunum | hay     | Positive | Hypoplasia                                      | 8.78E-05 | 170  |
|         | Alfalfa |          |                                                 |          |      |
| Jejunum | hay     | Positive | breast or colorectal cancer                     | 8.84E-05 | 1476 |
|         | Alfalfa |          |                                                 |          |      |
| Jejunum | hay     | Positive | Neurodegeneration                               | 9.27E-05 | 108  |
|         | Alfalfa |          |                                                 |          |      |
| Jejunum | hay     | Positive | breast or ovarian cancer                        | 9.42E-05 | 592  |
|         | Alfalfa |          |                                                 |          |      |
| Jejunum | hay     | Positive | Thrombosis                                      | 9.68E-05 | 63   |
|         | Alfalfa |          |                                                 |          |      |
| Jejunum | hay     | Positive | cartilage development                           | 9.68E-05 | 55   |
|         | Alfalfa |          |                                                 |          |      |
| Jejunum | hay     | Positive | cell death of tumor                             | 9.81E-05 | 131  |
|         | Alfalfa |          |                                                 |          |      |
| Jejunum | hay     | Positive | morphology of nervous system                    | 9.82E-05 | 256  |
|         | Alfalfa |          |                                                 |          |      |
| Jejunum | hay     | Positive | angiogenesis of tumor                           | 9.82E-05 | 47   |
|         | Alfalfa |          |                                                 |          |      |
| Jejunum | hay     | Positive | plasticity of synapse                           | 9.82E-05 | 47   |
| Jejunum | Alfalfa | Positive | movement of vascular endothelial cells          | 9.88E-05 | 67   |

|         |         |          |                                          |          |      |
|---------|---------|----------|------------------------------------------|----------|------|
|         | hay     |          |                                          |          |      |
|         | Alfalfa |          |                                          |          |      |
| Jejunum | hay     | Positive | Edema                                    | 9.88E-05 | 119  |
|         | Alfalfa |          |                                          |          |      |
| Jejunum | hay     | Positive | development of abdomen                   | 9.99E-05 | 193  |
|         | Alfalfa |          |                                          |          |      |
| Jejunum | hay     | Positive | shape change of tumor cell lines         | 1.04E-04 | 58   |
|         | Alfalfa |          |                                          |          |      |
| Jejunum | hay     | Positive | Gastrointestinal Tract Cancer and Tumors | 1.06E-04 | 1524 |
|         | Alfalfa |          |                                          |          |      |
| Jejunum | hay     | Positive | morphology of muscle                     | 1.10E-04 | 116  |
|         | Alfalfa |          |                                          |          |      |
| Jejunum | hay     | Positive | formation of lung                        | 1.13E-04 | 105  |
|         | Alfalfa |          |                                          |          |      |
| Jejunum | hay     | Positive | polymerization of protein                | 1.13E-04 | 127  |
|         | Alfalfa |          |                                          |          |      |
| Jejunum | hay     | Positive | mass of connective tissue                | 1.15E-04 | 73   |
|         | Alfalfa |          |                                          |          |      |
| Jejunum | hay     | Positive | neuronal cell death                      | 1.21E-04 | 224  |
|         | Alfalfa |          |                                          |          |      |
| Jejunum | hay     | Positive | abnormal morphology of epithelial tissue | 1.26E-04 | 142  |
|         | Alfalfa |          |                                          |          |      |
| Jejunum | hay     | Positive | bleeding of liver                        | 1.26E-04 | 18   |
|         | Alfalfa |          |                                          |          |      |
| Jejunum | hay     | Positive | proliferation of hematopoietic cells     | 1.35E-04 | 90   |
|         | Alfalfa |          |                                          |          |      |
| Jejunum | hay     | Positive | abnormal morphology of nervous system    | 1.36E-04 | 237  |
|         | Alfalfa |          |                                          |          |      |
| Jejunum | hay     | Positive | I-kappaB kinase/NF-kappaB cascade        | 1.36E-04 | 64   |
|         | Alfalfa |          |                                          |          |      |
| Jejunum | hay     | Positive | HIV infection                            | 1.43E-04 | 233  |
|         | Alfalfa |          |                                          |          |      |
| Jejunum | hay     | Positive | differentiation of muscle cell lines     | 1.58E-04 | 60   |
|         | Alfalfa |          |                                          |          |      |
| Jejunum | hay     | Positive | function of cardiovascular system        | 1.65E-04 | 126  |
|         | Alfalfa |          |                                          |          |      |
| Jejunum | hay     | Positive | development of head                      | 1.75E-04 | 314  |
|         | Alfalfa |          |                                          |          |      |
| Jejunum | hay     | Positive | outgrowth of cells                       | 1.76E-04 | 146  |
|         | Alfalfa |          |                                          |          |      |
| Jejunum | hay     | Positive | endocytosis                              | 1.83E-04 | 118  |
|         | Alfalfa |          |                                          |          |      |
| Jejunum | hay     | Positive | apoptosis of cervical cancer cell lines  | 1.83E-04 | 98   |
| Jejunum | Alfalfa | Positive | activation of blood cells                | 1.83E-04 | 243  |

|         |         |          |                                           |          |      |
|---------|---------|----------|-------------------------------------------|----------|------|
|         | hay     |          |                                           |          |      |
|         | Alfalfa |          |                                           |          |      |
| Jejunum | hay     | Positive | migration of cancer cells                 | 1.93E-04 | 70   |
|         | Alfalfa |          |                                           |          |      |
| Jejunum | hay     | Positive | cell movement of tumor cells              | 1.95E-04 | 67   |
|         | Alfalfa |          |                                           |          |      |
| Jejunum | hay     | Positive | hepatocellular carcinoma                  | 1.95E-04 | 1247 |
|         | Alfalfa |          |                                           |          |      |
| Jejunum | hay     | Positive | necrosis of tumor                         | 1.99E-04 | 129  |
|         | Alfalfa |          |                                           |          |      |
| Jejunum | hay     | Positive | binding of DNA                            | 1.99E-04 | 173  |
|         | Alfalfa |          |                                           |          |      |
| Jejunum | hay     | Positive | metabolism of protein                     | 1.99E-04 | 311  |
|         | Alfalfa |          |                                           |          |      |
| Jejunum | hay     | Positive | genital tumor                             | 2.04E-04 | 1205 |
|         | Alfalfa |          |                                           |          |      |
| Jejunum | hay     | Positive | cellular degradation                      | 2.07E-04 | 89   |
|         | Alfalfa |          |                                           |          |      |
| Jejunum | hay     | Positive | differentiation of mononuclear leukocytes | 2.09E-04 | 179  |
|         | Alfalfa |          |                                           |          |      |
| Jejunum | hay     | Positive | cell death of breast cancer cell lines    | 2.09E-04 | 114  |
|         | Alfalfa |          |                                           |          |      |
| Jejunum | hay     | Positive | synthesis of reactive oxygen species      | 2.12E-04 | 160  |
|         | Alfalfa |          |                                           |          |      |
| Jejunum | hay     | Positive | cell death of pheochromocytoma cell lines | 2.23E-04 | 46   |
|         | Alfalfa |          |                                           |          |      |
| Jejunum | hay     | Positive | cell death of heart cells                 | 2.32E-04 | 78   |
|         | Alfalfa |          |                                           |          |      |
| Jejunum | hay     | Positive | outgrowth of plasma membrane projections  | 2.32E-04 | 137  |
|         | Alfalfa |          |                                           |          |      |
| Jejunum | hay     | Positive | metastasis                                | 2.38E-04 | 246  |
|         | Alfalfa |          |                                           |          |      |
| Jejunum | hay     | Positive | vascularization                           | 2.39E-04 | 83   |
|         | Alfalfa |          |                                           |          |      |
| Jejunum | hay     | Positive | outgrowth of neurites                     | 2.42E-04 | 136  |
|         | Alfalfa |          |                                           |          |      |
| Jejunum | hay     | Positive | autophagy of cells                        | 2.45E-04 | 92   |
|         | Alfalfa |          |                                           |          |      |
| Jejunum | hay     | Positive | transport of alpha-amino acid             | 2.45E-04 | 30   |
|         | Alfalfa |          |                                           |          |      |
| Jejunum | hay     | Positive | synthesis of DNA                          | 2.45E-04 | 140  |
|         | Alfalfa |          |                                           |          |      |
| Jejunum | hay     | Positive | apoptosis of muscle                       | 2.51E-04 | 91   |
| Jejunum | Alfalfa | Positive | cell death of stem cells                  | 2.59E-04 | 34   |

|         |         |          |                                         |          |      |
|---------|---------|----------|-----------------------------------------|----------|------|
|         | hay     |          |                                         |          |      |
|         | Alfalfa |          |                                         |          |      |
| Jejunum | hay     | Positive | mass of adipose tissue                  | 2.61E-04 | 68   |
|         | Alfalfa |          |                                         |          |      |
| Jejunum | hay     | Positive | hypoplasia of organ                     | 2.62E-04 | 149  |
|         | Alfalfa |          |                                         |          |      |
| Jejunum | hay     | Positive | cardiogenesis                           | 2.62E-04 | 157  |
|         | Alfalfa |          |                                         |          |      |
| Jejunum | hay     | Positive | proliferation of mononuclear leukocytes | 2.65E-04 | 239  |
|         | Alfalfa |          |                                         |          |      |
| Jejunum | hay     | Positive | infection by RNA virus                  | 2.65E-04 | 278  |
|         | Alfalfa |          |                                         |          |      |
| Jejunum | hay     | Positive | ruffling                                | 2.66E-04 | 42   |
|         | Alfalfa |          |                                         |          |      |
| Jejunum | hay     | Positive | quantity of metal                       | 2.81E-04 | 165  |
|         | Alfalfa |          |                                         |          |      |
| Jejunum | hay     | Positive | proliferation of epithelial cell lines  | 2.82E-04 | 81   |
|         | Alfalfa |          |                                         |          |      |
| Jejunum | hay     | Positive | liver tumor                             | 2.83E-04 | 1292 |
|         | Alfalfa |          |                                         |          |      |
| Jejunum | hay     | Positive | organization of filaments               | 2.83E-04 | 73   |
|         | Alfalfa |          |                                         |          |      |
| Jejunum | hay     | Positive | neurodegeneration of cerebral cortex    | 2.89E-04 | 25   |
|         | Alfalfa |          |                                         |          |      |
| Jejunum | hay     | Positive | morphology of cardiovascular tissue     | 2.89E-04 | 35   |
|         | Alfalfa |          |                                         |          |      |
| Jejunum | hay     | Positive | cell death of neuroblastoma cell lines  | 2.97E-04 | 69   |
|         | Alfalfa |          |                                         |          |      |
| Jejunum | hay     | Positive | development of body axis                | 2.99E-04 | 333  |
|         | Alfalfa |          |                                         |          |      |
| Jejunum | hay     | Positive | cell death of melanoma cell lines       | 3.15E-04 | 87   |
|         | Alfalfa |          |                                         |          |      |
| Jejunum | hay     | Positive | liver cancer                            | 3.16E-04 | 1283 |
|         | Alfalfa |          |                                         |          |      |
| Jejunum | hay     | Positive | abdominal carcinoma                     | 3.16E-04 | 1760 |
|         | Alfalfa |          |                                         |          |      |
| Jejunum | hay     | Positive | proliferation of lymphocytes            | 3.16E-04 | 235  |
|         | Alfalfa |          |                                         |          |      |
| Jejunum | hay     | Positive | advanced malignant tumor                | 3.20E-04 | 271  |
|         | Alfalfa |          |                                         |          |      |
| Jejunum | hay     | Positive | apoptosis of muscle cells               | 3.25E-04 | 90   |
|         | Alfalfa |          |                                         |          |      |
| Jejunum | hay     | Positive | export of molecule                      | 3.26E-04 | 101  |
| Jejunum | Alfalfa | Positive | metabolism of reactive oxygen species   | 3.26E-04 | 165  |

|         |         |          |                                          |          |      |
|---------|---------|----------|------------------------------------------|----------|------|
|         | hay     |          |                                          |          |      |
|         | Alfalfa |          |                                          |          |      |
| Jejunum | hay     | Positive | intracranial hemorrhage                  | 3.27E-04 | 52   |
|         | Alfalfa |          |                                          |          |      |
| Jejunum | hay     | Positive | morphology of lymphatic system component | 3.30E-04 | 139  |
|         | Alfalfa |          |                                          |          |      |
| Jejunum | hay     | Positive | congenital malformation of skeleton      | 3.31E-04 | 141  |
|         | Alfalfa |          |                                          |          |      |
| Jejunum | hay     | Positive | memory                                   | 3.31E-04 | 89   |
|         | Alfalfa |          |                                          |          |      |
| Jejunum | hay     | Positive | cell death of tumor cells                | 3.33E-04 | 125  |
|         | Alfalfa |          |                                          |          |      |
| Jejunum | hay     | Positive | secretory pathway                        | 3.34E-04 | 70   |
|         | Alfalfa |          |                                          |          |      |
| Jejunum | hay     | Positive | transport of carbohydrate                | 3.38E-04 | 69   |
|         | Alfalfa |          |                                          |          |      |
| Jejunum | hay     | Positive | homeostasis of ion                       | 3.41E-04 | 83   |
|         | Alfalfa |          |                                          |          |      |
| Jejunum | hay     | Positive | proliferation of T lymphocytes           | 3.57E-04 | 197  |
|         | Alfalfa |          |                                          |          |      |
| Jejunum | hay     | Positive | cell death of embryonic cells            | 3.64E-04 | 44   |
|         | Alfalfa |          |                                          |          |      |
| Jejunum | hay     | Positive | apoptosis of carcinoma cell lines        | 3.69E-04 | 85   |
|         | Alfalfa |          |                                          |          |      |
| Jejunum | hay     | Positive | differentiation of tumor cell lines      | 3.73E-04 | 127  |
|         | Alfalfa |          |                                          |          |      |
| Jejunum | hay     | Positive | female genital tract serous cancer       | 3.78E-04 | 129  |
|         | Alfalfa |          |                                          |          |      |
| Jejunum | hay     | Positive | necrosis of epithelial tissue            | 3.87E-04 | 192  |
|         | Alfalfa |          |                                          |          |      |
| Jejunum | hay     | Positive | degeneration of neurons                  | 3.89E-04 | 83   |
|         | Alfalfa |          |                                          |          |      |
| Jejunum | hay     | Positive | hepatobiliary system cancer              | 3.91E-04 | 1287 |
|         | Alfalfa |          |                                          |          |      |
| Jejunum | hay     | Positive | survival of organism                     | 3.91E-04 | 227  |
|         | Alfalfa |          |                                          |          |      |
| Jejunum | hay     | Positive | reorganization of cytoskeleton           | 3.95E-04 | 68   |
|         | Alfalfa |          |                                          |          |      |
| Jejunum | hay     | Positive | gastrointestinal adenocarcinoma          | 4.04E-04 | 1266 |
|         | Alfalfa |          |                                          |          |      |
| Jejunum | hay     | Positive | cleavage of cells                        | 4.08E-04 | 56   |
|         | Alfalfa |          |                                          |          |      |
| Jejunum | hay     | Positive | congenital anomaly of skin               | 4.08E-04 | 64   |
| Jejunum | Alfalfa | Positive | formation of muscle cells                | 4.08E-04 | 64   |

|         |         |          |                                         |          |      |
|---------|---------|----------|-----------------------------------------|----------|------|
|         | hay     |          |                                         |          |      |
|         | Alfalfa |          |                                         |          |      |
| Jejunum | hay     | Positive | migration of vascular endothelial cells | 4.13E-04 | 60   |
|         | Alfalfa |          |                                         |          |      |
| Jejunum | hay     | Positive | mammary tumor                           | 4.14E-04 | 505  |
|         | Alfalfa |          |                                         |          |      |
| Jejunum | hay     | Positive | synthesis of glycosaminoglycan          | 4.17E-04 | 34   |
|         | Alfalfa |          |                                         |          |      |
| Jejunum | hay     | Positive | cancer of secretory structure           | 4.17E-04 | 601  |
|         | Alfalfa |          |                                         |          |      |
| Jejunum | hay     | Positive | abnormal morphology of digestive system | 4.25E-04 | 178  |
|         | Alfalfa |          |                                         |          |      |
| Jejunum | hay     | Positive | apoptosis of breast cancer cell lines   | 4.42E-04 | 98   |
|         | Alfalfa |          |                                         |          |      |
| Jejunum | hay     | Positive | concentration of phosphatidic acid      | 4.42E-04 | 50   |
|         | Alfalfa |          |                                         |          |      |
| Jejunum | hay     | Positive | uptake of D-glucose                     | 4.42E-04 | 77   |
|         | Alfalfa |          |                                         |          |      |
| Jejunum | hay     | Positive | respiratory system development          | 4.42E-04 | 115  |
|         | Alfalfa |          |                                         |          |      |
| Jejunum | hay     | Positive | serous neoplasm                         | 4.47E-04 | 198  |
|         | Alfalfa |          |                                         |          |      |
| Jejunum | hay     | Positive | growth of lymphatic system component    | 4.50E-04 | 68   |
|         | Alfalfa |          |                                         |          |      |
| Jejunum | hay     | Positive | melanoma                                | 4.70E-04 | 1940 |
|         | Alfalfa |          |                                         |          |      |
| Jejunum | hay     | Positive | interphase                              | 4.77E-04 | 212  |
|         | Alfalfa |          |                                         |          |      |
| Jejunum | hay     | Positive | consumption of oxygen                   | 4.77E-04 | 56   |
|         | Alfalfa |          |                                         |          |      |
| Jejunum | hay     | Positive | long-term potentiation                  | 4.77E-04 | 84   |
|         | Alfalfa |          |                                         |          |      |
| Jejunum | hay     | Positive | cell death of heart                     | 4.78E-04 | 79   |
|         | Alfalfa |          |                                         |          |      |
| Jejunum | hay     | Positive | activation of leukocytes                | 4.79E-04 | 225  |
|         | Alfalfa |          |                                         |          |      |
| Jejunum | hay     | Positive | cell movement of carcinoma cell lines   | 4.85E-04 | 72   |
|         | Alfalfa |          |                                         |          |      |
| Jejunum | hay     | Positive | migration of tumor cells                | 4.88E-04 | 78   |
|         | Alfalfa |          |                                         |          |      |
| Jejunum | hay     | Positive | cytopenia                               | 4.89E-04 | 101  |
|         | Alfalfa |          |                                         |          |      |
| Jejunum | hay     | Positive | proliferation of embryoblast            | 5.02E-04 | 13   |
| Jejunum | Alfalfa | Positive | cell death of carcinoma cell lines      | 5.04E-04 | 97   |

|         |         |          |                                         |          |     |
|---------|---------|----------|-----------------------------------------|----------|-----|
|         | hay     |          |                                         |          |     |
|         | Alfalfa |          |                                         |          |     |
| Jejunum | hay     | Positive | formation of vascular lesion            | 5.07E-04 | 43  |
|         | Alfalfa |          |                                         |          |     |
| Jejunum | hay     | Positive | occlusion of artery                     | 5.09E-04 | 156 |
|         | Alfalfa |          |                                         |          |     |
| Jejunum | hay     | Positive | metastatic colorectal cancer            | 5.15E-04 | 68  |
|         | Alfalfa |          |                                         |          |     |
| Jejunum | hay     | Positive | differentiation of bone                 | 5.16E-04 | 136 |
|         | Alfalfa |          |                                         |          |     |
| Jejunum | hay     | Positive | prostatic disease                       | 5.16E-04 | 312 |
|         | Alfalfa |          |                                         |          |     |
| Jejunum | hay     | Positive | quantity of metal ion                   | 5.16E-04 | 146 |
|         | Alfalfa |          |                                         |          |     |
| Jejunum | hay     | Positive | cell death of blood cells               | 5.16E-04 | 223 |
|         | Alfalfa |          |                                         |          |     |
| Jejunum | hay     | Positive | exocytosis                              | 5.16E-04 | 67  |
|         | Alfalfa |          |                                         |          |     |
| Jejunum | hay     | Positive | differentiation of epithelial tissue    | 5.26E-04 | 120 |
|         | Alfalfa |          |                                         |          |     |
| Jejunum | hay     | Positive | morphology of leukocytes                | 5.28E-04 | 115 |
|         | Alfalfa |          |                                         |          |     |
| Jejunum | hay     | Positive | Oral Cancer and Tumors                  | 5.32E-04 | 79  |
|         | Alfalfa |          |                                         |          |     |
| Jejunum | hay     | Positive | synthesis of protein                    | 5.35E-04 | 147 |
|         | Alfalfa |          |                                         |          |     |
| Jejunum | hay     | Positive | size of lesion                          | 5.45E-04 | 87  |
|         | Alfalfa |          |                                         |          |     |
| Jejunum | hay     | Positive | transport of monosaccharide             | 5.50E-04 | 57  |
|         | Alfalfa |          |                                         |          |     |
| Jejunum | hay     | Positive | function of myeloid cells               | 5.57E-04 | 82  |
|         | Alfalfa |          |                                         |          |     |
| Jejunum | hay     | Positive | vaso-occlusion                          | 5.65E-04 | 157 |
|         | Alfalfa |          |                                         |          |     |
| Jejunum | hay     | Positive | growth of plasma membrane projections   | 5.73E-04 | 153 |
|         | Alfalfa |          |                                         |          |     |
| Jejunum | hay     | Positive | concentration of Ca <sup>2+</sup>       | 5.75E-04 | 47  |
|         | Alfalfa |          |                                         |          |     |
| Jejunum | hay     | Positive | apoptosis of muscle cell lines          | 5.84E-04 | 27  |
|         | Alfalfa |          |                                         |          |     |
| Jejunum | hay     | Positive | cell spreading of fibroblast cell lines | 5.84E-04 | 24  |
|         | Alfalfa |          |                                         |          |     |
| Jejunum | hay     | Positive | transport of ion                        | 5.84E-04 | 165 |
| Jejunum | Alfalfa | Positive | male genital neoplasm                   | 5.84E-04 | 326 |



|         |         |          |                                          |          |     |
|---------|---------|----------|------------------------------------------|----------|-----|
|         | hay     |          |                                          |          |     |
|         | Alfalfa |          |                                          |          |     |
| Jejunum | hay     | Positive | function of phagocytes                   | 6.16E-04 | 103 |
|         | Alfalfa |          |                                          |          |     |
| Jejunum | hay     | Positive | size of animal                           | 6.24E-04 | 63  |
|         | Alfalfa |          |                                          |          |     |
| Jejunum | hay     | Positive | morphology of airway                     | 6.26E-04 | 14  |
|         | Alfalfa |          |                                          |          |     |
| Jejunum | hay     | Positive | cell viability of carcinoma cell lines   | 6.27E-04 | 52  |
|         | Alfalfa |          |                                          |          |     |
| Jejunum | hay     | Positive | transport of D-glucose                   | 6.27E-04 | 52  |
|         | Alfalfa |          |                                          |          |     |
| Jejunum | hay     | Positive | morphology of digestive system           | 6.28E-04 | 185 |
|         | Alfalfa |          |                                          |          |     |
| Jejunum | hay     | Positive | morphology of pulmonary alveolus         | 6.28E-04 | 44  |
|         | Alfalfa |          |                                          |          |     |
| Jejunum | hay     | Positive | cytostasis of tumor cell lines           | 6.40E-04 | 57  |
|         | Alfalfa |          |                                          |          |     |
| Jejunum | hay     | Positive | metabolism of nucleotide                 | 6.60E-04 | 144 |
|         | Alfalfa |          |                                          |          |     |
| Jejunum | hay     | Positive | growth of thymus gland                   | 6.66E-04 | 37  |
|         | Alfalfa |          |                                          |          |     |
| Jejunum | hay     | Positive | cell death of epithelial cells           | 6.67E-04 | 162 |
|         | Alfalfa |          |                                          |          |     |
| Jejunum | hay     | Positive | abnormal morphology of muscle            | 6.71E-04 | 106 |
|         | Alfalfa |          |                                          |          |     |
| Jejunum | hay     | Positive | bleeding of brain                        | 6.89E-04 | 28  |
|         | Alfalfa |          |                                          |          |     |
| Jejunum | hay     | Positive | muscle tumor                             | 6.91E-04 | 120 |
|         | Alfalfa |          |                                          |          |     |
| Jejunum | hay     | Positive | arthropathy                              | 6.91E-04 | 300 |
|         | Alfalfa |          |                                          |          |     |
| Jejunum | hay     | Positive | oral cancer                              | 6.95E-04 | 78  |
|         | Alfalfa |          |                                          |          |     |
| Jejunum | hay     | Positive | abnormal morphology of conducting airway | 7.05E-04 | 12  |
|         | Alfalfa |          |                                          |          |     |
| Jejunum | hay     | Positive | accumulation of cells                    | 7.07E-04 | 117 |
|         | Alfalfa |          |                                          |          |     |
| Jejunum | hay     | Positive | occlusion of blood vessel                | 7.07E-04 | 157 |
|         | Alfalfa |          |                                          |          |     |
| Jejunum | hay     | Positive | dysmyelination                           | 7.09E-04 | 49  |
|         | Alfalfa |          |                                          |          |     |
| Jejunum | hay     | Positive | differentiation of bone cells            | 7.15E-04 | 134 |
| Jejunum | Alfalfa | Positive | growth of neurites                       | 7.24E-04 | 151 |

|         |         |          |                                      |          |     |
|---------|---------|----------|--------------------------------------|----------|-----|
|         | hay     |          |                                      |          |     |
|         | Alfalfa |          |                                      |          |     |
| Jejunum | hay     | Positive | arthritis                            | 7.24E-04 | 295 |
|         | Alfalfa |          |                                      |          |     |
| Jejunum | hay     | Positive | Prostate Cancer and Tumors           | 7.28E-04 | 306 |
|         | Alfalfa |          |                                      |          |     |
| Jejunum | hay     | Positive | cell movement of cancer cells        | 7.37E-04 | 53  |
|         | Alfalfa |          |                                      |          |     |
| Jejunum | hay     | Positive | abnormal morphology of artery        | 7.38E-04 | 54  |
|         | Alfalfa |          |                                      |          |     |
| Jejunum | hay     | Positive | death of embryo                      | 7.38E-04 | 54  |
|         | Alfalfa |          |                                      |          |     |
| Jejunum | hay     | Positive | proliferation of hepatoma cell lines | 7.38E-04 | 69  |
|         | Alfalfa |          |                                      |          |     |
| Jejunum | hay     | Positive | epilepsy                             | 7.38E-04 | 103 |
|         | Alfalfa |          |                                      |          |     |
| Jejunum | hay     | Positive | transactivation of RNA               | 7.43E-04 | 176 |
|         | Alfalfa |          |                                      |          |     |
| Jejunum | hay     | Positive | morphology of heart ventricle        | 7.67E-04 | 67  |
|         | Alfalfa |          |                                      |          |     |
| Jejunum | hay     | Positive | peripheral arterial disease          | 7.76E-04 | 73  |
|         | Alfalfa |          |                                      |          |     |
| Jejunum | hay     | Positive | apoptosis of heart cells             | 7.79E-04 | 66  |
|         | Alfalfa |          |                                      |          |     |
| Jejunum | hay     | Positive | neurodegeneration of hippocampus     | 7.93E-04 | 19  |
|         | Alfalfa |          |                                      |          |     |
| Jejunum | hay     | Positive | oral tumor                           | 7.97E-04 | 101 |
|         | Alfalfa |          |                                      |          |     |
| Jejunum | hay     | Positive | concentration of phospholipid        | 8.02E-04 | 64  |
|         | Alfalfa |          |                                      |          |     |
| Jejunum | hay     | Positive | morphology of lymphoid organ         | 8.02E-04 | 129 |
|         | Alfalfa |          |                                      |          |     |
| Jejunum | hay     | Positive | accumulation of blood cells          | 8.32E-04 | 94  |
|         | Alfalfa |          |                                      |          |     |
| Jejunum | hay     | Positive | morphology of spleen                 | 8.32E-04 | 94  |
|         | Alfalfa |          |                                      |          |     |
| Jejunum | hay     | Positive | proliferation of tumor cells         | 8.32E-04 | 153 |
|         | Alfalfa |          |                                      |          |     |
| Jejunum | hay     | Positive | attachment of cells                  | 8.32E-04 | 49  |
|         | Alfalfa |          |                                      |          |     |
| Jejunum | hay     | Positive | migration of carcinoma cell lines    | 8.37E-04 | 60  |
|         | Alfalfa |          |                                      |          |     |
| Jejunum | hay     | Positive | replication of virus                 | 8.49E-04 | 181 |
| Jejunum | Alfalfa | Positive | hypertrophy of heart                 | 8.50E-04 | 112 |

|         |         |          |                                            |          |     |
|---------|---------|----------|--------------------------------------------|----------|-----|
|         | hay     |          |                                            |          |     |
|         | Alfalfa |          |                                            |          |     |
| Jejunum | hay     | Positive | branching of neurons                       | 8.57E-04 | 96  |
|         | Alfalfa |          |                                            |          |     |
| Jejunum | hay     | Positive | replication of RNA virus                   | 8.74E-04 | 164 |
|         | Alfalfa |          |                                            |          |     |
| Jejunum | hay     | Positive | differentiation of endothelial cells       | 8.85E-04 | 30  |
|         | Alfalfa |          |                                            |          |     |
| Jejunum | hay     | Positive | demyelination                              | 9.01E-04 | 44  |
|         | Alfalfa |          |                                            |          |     |
| Jejunum | hay     | Positive | multiple congenital anomalies              | 9.06E-04 | 138 |
|         | Alfalfa |          |                                            |          |     |
| Jejunum | hay     | Positive | malignant gallbladder neoplasia            | 9.06E-04 | 13  |
|         | Alfalfa |          |                                            |          |     |
| Jejunum | hay     | Positive | proliferation of embryonic stem cell lines | 9.06E-04 | 13  |
|         | Alfalfa |          |                                            |          |     |
| Jejunum | hay     | Positive | flux of ion                                | 9.40E-04 | 107 |
|         | Alfalfa |          |                                            |          |     |
| Jejunum | hay     | Positive | transformation of fibroblast cell lines    | 9.40E-04 | 87  |
|         | Alfalfa |          |                                            |          |     |
| Jejunum | hay     | Positive | cell death of myeloma cell lines           | 9.40E-04 | 36  |
|         | Alfalfa |          |                                            |          |     |
| Jejunum | hay     | Positive | benign neoplasm of female genital organ    | 9.42E-04 | 139 |
|         | Alfalfa |          |                                            |          |     |
| Jejunum | hay     | Positive | branching of neurites                      | 9.52E-04 | 93  |
|         | Alfalfa |          |                                            |          |     |
| Jejunum | hay     | Positive | hereditary neoplastic syndrome             | 9.67E-04 | 60  |
|         | Alfalfa |          |                                            |          |     |
| Jejunum | hay     | Positive | morphology of artery                       | 1.01E-03 | 55  |
|         | Alfalfa |          |                                            |          |     |
| Jejunum | hay     | Positive | neonatal death                             | 1.02E-03 | 143 |
|         | Alfalfa |          |                                            |          |     |
| Jejunum | hay     | Positive | abnormal morphology of pulmonary alveolus  | 1.02E-03 | 42  |
|         | Alfalfa |          |                                            |          |     |
| Jejunum | hay     | Positive | morphology of lung                         | 1.04E-03 | 65  |
|         | Alfalfa |          |                                            |          |     |
| Jejunum | hay     | Positive | abnormal morphology of bone                | 1.07E-03 | 142 |
|         | Alfalfa |          |                                            |          |     |
| Jejunum | hay     | Positive | size of cells                              | 1.07E-03 | 140 |
|         | Alfalfa |          |                                            |          |     |
| Jejunum | hay     | Positive | G2 phase of fibroblasts                    | 1.07E-03 | 14  |
|         | Alfalfa |          |                                            |          |     |
| Jejunum | hay     | Positive | abnormal morphology of lymphoid organ      | 1.08E-03 | 124 |
| Jejunum | Alfalfa | Positive | apoptosis of myeloma cell lines            | 1.09E-03 | 32  |

|         |         |          |                                          |          |     |
|---------|---------|----------|------------------------------------------|----------|-----|
|         | hay     |          |                                          |          |     |
|         | Alfalfa |          |                                          |          |     |
| Jejunum | hay     | Positive | morphology of endothelial tissue         | 1.09E-03 | 32  |
|         | Alfalfa |          |                                          |          |     |
| Jejunum | hay     | Positive | morphology of axial skeleton             | 1.09E-03 | 69  |
|         | Alfalfa |          |                                          |          |     |
| Jejunum | hay     | Positive | quantity of IgG2a                        | 1.11E-03 | 39  |
|         | Alfalfa |          |                                          |          |     |
| Jejunum | hay     | Positive | cell death of cardiomyocytes             | 1.13E-03 | 73  |
|         | Alfalfa |          |                                          |          |     |
| Jejunum | hay     | Positive | morphology of bone                       | 1.13E-03 | 146 |
|         | Alfalfa |          |                                          |          |     |
| Jejunum | hay     | Positive | anemia                                   | 1.14E-03 | 114 |
|         | Alfalfa |          |                                          |          |     |
| Jejunum | hay     | Positive | Emery-Dreifuss muscular dystrophy        | 1.14E-03 | 26  |
|         | Alfalfa |          |                                          |          |     |
| Jejunum | hay     | Positive | transport of L-amino acid                | 1.14E-03 | 26  |
|         | Alfalfa |          |                                          |          |     |
| Jejunum | hay     | Positive | formation of filopodia                   | 1.14E-03 | 58  |
|         | Alfalfa |          |                                          |          |     |
| Jejunum | hay     | Positive | autophosphorylation of protein           | 1.16E-03 | 56  |
|         | Alfalfa |          |                                          |          |     |
| Jejunum | hay     | Positive | influx of inorganic cation               | 1.16E-03 | 66  |
|         | Alfalfa |          |                                          |          |     |
| Jejunum | hay     | Positive | secretion of molecule                    | 1.16E-03 | 177 |
|         | Alfalfa |          |                                          |          |     |
| Jejunum | hay     | Positive | metabolism of DNA                        | 1.17E-03 | 130 |
|         | Alfalfa |          |                                          |          |     |
| Jejunum | hay     | Positive | autosomal dominant myopathy              | 1.17E-03 | 33  |
|         | Alfalfa |          |                                          |          |     |
| Jejunum | hay     | Positive | MAPKKK cascade                           | 1.21E-03 | 70  |
|         | Alfalfa |          |                                          |          |     |
| Jejunum | hay     | Positive | medullary carcinoma                      | 1.22E-03 | 16  |
|         | Alfalfa |          |                                          |          |     |
| Jejunum | hay     | Positive | cell viability of lung cancer cell lines | 1.22E-03 | 42  |
|         | Alfalfa |          |                                          |          |     |
| Jejunum | hay     | Positive | flux of inorganic cation                 | 1.22E-03 | 100 |
|         | Alfalfa |          |                                          |          |     |
| Jejunum | hay     | Positive | apoptosis of fibroblasts                 | 1.23E-03 | 74  |
|         | Alfalfa |          |                                          |          |     |
| Jejunum | hay     | Positive | necrosis of cardiac muscle               | 1.23E-03 | 74  |
|         | Alfalfa |          |                                          |          |     |
| Jejunum | hay     | Positive | malignant neoplasm of male genital organ | 1.23E-03 | 310 |
| Jejunum | Alfalfa | Positive | shape change of neurons                  | 1.23E-03 | 97  |

|         |         |          |                                               |          |     |
|---------|---------|----------|-----------------------------------------------|----------|-----|
|         | hay     |          |                                               |          |     |
|         | Alfalfa |          |                                               |          |     |
| Jejunum | hay     | Positive | transport of carboxylic acid                  | 1.25E-03 | 43  |
|         | Alfalfa |          |                                               |          |     |
| Jejunum | hay     | Positive | formation of skin                             | 1.26E-03 | 120 |
|         | Alfalfa |          |                                               |          |     |
| Jejunum | hay     | Positive | invasion of tissue                            | 1.28E-03 | 67  |
|         | Alfalfa |          |                                               |          |     |
| Jejunum | hay     | Positive | oral cavity carcinoma                         | 1.28E-03 | 67  |
|         | Alfalfa |          |                                               |          |     |
| Jejunum | hay     | Positive | cell death of fibrosarcoma cell lines         | 1.29E-03 | 29  |
|         | Alfalfa |          |                                               |          |     |
| Jejunum | hay     | Positive | morphology of aorta                           | 1.30E-03 | 27  |
|         | Alfalfa |          |                                               |          |     |
| Jejunum | hay     | Positive | fertility                                     | 1.31E-03 | 119 |
|         | Alfalfa |          |                                               |          |     |
| Jejunum | hay     | Positive | synthesis of fatty acid                       | 1.32E-03 | 103 |
|         | Alfalfa |          |                                               |          |     |
| Jejunum | hay     | Positive | synthesis of nitric oxide                     | 1.34E-03 | 92  |
|         | Alfalfa |          |                                               |          |     |
| Jejunum | hay     | Positive | mixed papillary and follicular thyroid cancer | 1.34E-03 | 10  |
|         | Alfalfa |          |                                               |          |     |
| Jejunum | hay     | Positive | abnormal morphology of spleen                 | 1.34E-03 | 89  |
|         | Alfalfa |          |                                               |          |     |
| Jejunum | hay     | Positive | smooth muscle tumor                           | 1.34E-03 | 100 |
|         | Alfalfa |          |                                               |          |     |
| Jejunum | hay     | Positive | function of muscle                            | 1.34E-03 | 114 |
|         | Alfalfa |          |                                               |          |     |
| Jejunum | hay     | Positive | ploidy of cells                               | 1.34E-03 | 49  |
|         | Alfalfa |          |                                               |          |     |
| Jejunum | hay     | Positive | cell death of embryonic stem cells            | 1.42E-03 | 21  |
|         | Alfalfa |          |                                               |          |     |
| Jejunum | hay     | Positive | flux of cation                                | 1.42E-03 | 101 |
|         | Alfalfa |          |                                               |          |     |
| Jejunum | hay     | Positive | connective or soft tissue tumor               | 1.42E-03 | 223 |
|         | Alfalfa |          |                                               |          |     |
| Jejunum | hay     | Positive | oral squamous cell carcinoma                  | 1.44E-03 | 61  |
|         | Alfalfa |          |                                               |          |     |
| Jejunum | hay     | Positive | quantity of immunoglobulin                    | 1.45E-03 | 98  |
|         | Alfalfa |          |                                               |          |     |
| Jejunum | hay     | Positive | breast cancer                                 | 1.45E-03 | 466 |
|         | Alfalfa |          |                                               |          |     |
| Jejunum | hay     | Positive | laminopathy                                   | 1.48E-03 | 28  |
| Jejunum | Alfalfa | Positive | morphology of lymphocytes                     | 1.49E-03 | 66  |

|         |         |          |                                          |          |      |
|---------|---------|----------|------------------------------------------|----------|------|
|         | hay     |          |                                          |          |      |
|         | Alfalfa |          |                                          |          |      |
| Jejunum | hay     | Positive | malignant neoplasm of endocrine gland    | 1.51E-03 | 102  |
|         | Alfalfa |          |                                          |          |      |
| Jejunum | hay     | Positive | metastatic gastrointestinal tract cancer | 1.51E-03 | 75   |
|         | Alfalfa |          |                                          |          |      |
| Jejunum | hay     | Negative | proliferation of cells                   | 2.10E-29 | 1198 |
|         | Alfalfa |          |                                          |          |      |
| Jejunum | hay     | Negative | cell death                               | 7.03E-28 | 1091 |
|         | Alfalfa |          |                                          |          |      |
| Jejunum | hay     | Negative | malignant solid tumor                    | 5.07E-25 | 2994 |
|         | Alfalfa |          |                                          |          |      |
| Jejunum | hay     | Negative | cancer                                   | 2.48E-24 | 3023 |
|         | Alfalfa |          |                                          |          |      |
| Jejunum | hay     | Negative | necrosis                                 | 1.31E-22 | 850  |
|         | Alfalfa |          |                                          |          |      |
| Jejunum | hay     | Negative | organization of cytoplasm                | 6.17E-22 | 546  |
|         | Alfalfa |          |                                          |          |      |
| Jejunum | hay     | Negative | transport of molecule                    | 1.39E-21 | 568  |
|         | Alfalfa |          |                                          |          |      |
| Jejunum | hay     | Negative | cell movement                            | 3.91E-21 | 716  |
|         | Alfalfa |          |                                          |          |      |
| Jejunum | hay     | Negative | morphology of cells                      | 4.18E-21 | 663  |
|         | Alfalfa |          |                                          |          |      |
| Jejunum | hay     | Negative | apoptosis                                | 7.30E-21 | 860  |
|         | Alfalfa |          |                                          |          |      |
| Jejunum | hay     | Negative | organismal death                         | 7.28E-20 | 785  |
|         | Alfalfa |          |                                          |          |      |
| Jejunum | hay     | Negative | morbidity or mortality                   | 1.87E-19 | 792  |
|         | Alfalfa |          |                                          |          |      |
| Jejunum | hay     | Negative | cell survival                            | 3.50E-18 | 488  |
|         | Alfalfa |          |                                          |          |      |
| Jejunum | hay     | Negative | organization of cytoskeleton             | 7.97E-18 | 487  |
|         | Alfalfa |          |                                          |          |      |
| Jejunum | hay     | Negative | cell viability                           | 1.22E-17 | 458  |
|         | Alfalfa |          |                                          |          |      |
| Jejunum | hay     | Negative | migration of cells                       | 4.82E-17 | 631  |
|         | Alfalfa |          |                                          |          |      |
| Jejunum | hay     | Negative | cellular homeostasis                     | 8.29E-16 | 515  |
|         | Alfalfa |          |                                          |          |      |
| Jejunum | hay     | Negative | differentiation of cells                 | 2.09E-15 | 721  |
|         | Alfalfa |          |                                          |          |      |
| Jejunum | hay     | Negative | neoplasia of epithelial tissue           | 3.13E-14 | 2467 |
| Jejunum | Alfalfa | Negative | tumorigenesis of tissue                  | 5.42E-14 | 2503 |

|         |         |          |                                   |          |      |
|---------|---------|----------|-----------------------------------|----------|------|
|         | hay     |          |                                   |          |      |
|         | Alfalfa |          |                                   |          |      |
| Jejunum | hay     | Negative | microtubule dynamics              | 1.16E-13 | 406  |
|         | Alfalfa |          |                                   |          |      |
| Jejunum | hay     | Negative | expression of RNA                 | 1.54E-13 | 681  |
|         | Alfalfa |          |                                   |          |      |
| Jejunum | hay     | Negative | epithelial cancer                 | 2.13E-13 | 2439 |
|         | Alfalfa |          |                                   |          |      |
| Jejunum | hay     | Negative | transcription                     | 3.87E-13 | 636  |
|         | Alfalfa |          |                                   |          |      |
| Jejunum | hay     | Negative | transcription of RNA              | 4.23E-13 | 597  |
|         | Alfalfa |          |                                   |          |      |
| Jejunum | hay     | Negative | quantity of cells                 | 5.54E-13 | 571  |
|         | Alfalfa |          |                                   |          |      |
| Jejunum | hay     | Negative | abdominal neoplasm                | 3.43E-12 | 2434 |
|         | Alfalfa |          |                                   |          |      |
| Jejunum | hay     | Negative | development of cytoplasm          | 5.01E-12 | 177  |
|         | Alfalfa |          |                                   |          |      |
| Jejunum | hay     | Negative | angiogenesis                      | 5.01E-12 | 316  |
|         | Alfalfa |          |                                   |          |      |
| Jejunum | hay     | Negative | vasculogenesis                    | 5.01E-12 | 264  |
|         | Alfalfa |          |                                   |          |      |
| Jejunum | hay     | Negative | concentration of lipid            | 7.87E-12 | 286  |
|         | Alfalfa |          |                                   |          |      |
| Jejunum | hay     | Negative | abdominal cancer                  | 2.88E-11 | 2400 |
|         | Alfalfa |          |                                   |          |      |
| Jejunum | hay     | Negative | formation of cytoskeleton         | 4.39E-11 | 146  |
|         | Alfalfa |          |                                   |          |      |
| Jejunum | hay     | Negative | transcription of DNA              | 4.75E-11 | 494  |
|         | Alfalfa |          |                                   |          |      |
| Jejunum | hay     | Negative | organization of organelle         | 6.36E-11 | 198  |
|         | Alfalfa |          |                                   |          |      |
| Jejunum | hay     | Negative | cell movement of tumor cell lines | 1.33E-10 | 293  |
|         | Alfalfa |          |                                   |          |      |
| Jejunum | hay     | Negative | invasion of cells                 | 1.65E-10 | 298  |
|         | Alfalfa |          |                                   |          |      |
| Jejunum | hay     | Negative | Movement Disorders                | 1.65E-10 | 354  |
|         | Alfalfa |          |                                   |          |      |
| Jejunum | hay     | Negative | proliferation of tumor cell lines | 1.86E-10 | 494  |
|         | Alfalfa |          |                                   |          |      |
| Jejunum | hay     | Negative | quantity of leukocytes            | 2.35E-10 | 311  |
|         | Alfalfa |          |                                   |          |      |
| Jejunum | hay     | Negative | cell death of tumor cell lines    | 3.54E-10 | 486  |
| Jejunum | Alfalfa | Negative | formation of filaments            | 3.73E-10 | 150  |

|         |         |          |                                          |          |     |
|---------|---------|----------|------------------------------------------|----------|-----|
|         | hay     |          |                                          |          |     |
|         | Alfalfa |          |                                          |          |     |
| Jejunum | hay     | Negative | fibrogenesis                             | 4.89E-10 | 154 |
|         | Alfalfa |          |                                          |          |     |
| Jejunum | hay     | Negative | quantity of blood cells                  | 5.48E-10 | 342 |
|         | Alfalfa |          |                                          |          |     |
| Jejunum | hay     | Negative | cell viability of tumor cell lines       | 1.67E-09 | 266 |
|         | Alfalfa |          |                                          |          |     |
| Jejunum | hay     | Negative | neuronal cell death                      | 2.13E-09 | 236 |
|         | Alfalfa |          |                                          |          |     |
| Jejunum | hay     | Negative | synthesis of lipid                       | 2.13E-09 | 246 |
|         | Alfalfa |          |                                          |          |     |
| Jejunum | hay     | Negative | size of body                             | 2.13E-09 | 287 |
|         | Alfalfa |          |                                          |          |     |
| Jejunum | hay     | Negative | protein kinase cascade                   | 2.15E-09 | 155 |
|         | Alfalfa |          |                                          |          |     |
| Jejunum | hay     | Negative | transactivation                          | 2.32E-09 | 204 |
|         | Alfalfa |          |                                          |          |     |
| Jejunum | hay     | Negative | abnormal morphology of cells             | 2.32E-09 | 407 |
|         | Alfalfa |          |                                          |          |     |
| Jejunum | hay     | Negative | formation of cellular protrusions        | 2.37E-09 | 302 |
|         | Alfalfa |          |                                          |          |     |
| Jejunum | hay     | Negative | dyskinesia                               | 6.94E-09 | 214 |
|         | Alfalfa |          |                                          |          |     |
| Jejunum | hay     | Negative | growth of connective tissue              | 8.29E-09 | 222 |
|         | Alfalfa |          |                                          |          |     |
| Jejunum | hay     | Negative | cell movement of myeloid cells           | 8.29E-09 | 190 |
|         | Alfalfa |          |                                          |          |     |
| Jejunum | hay     | Negative | disorder of basal ganglia                | 8.29E-09 | 259 |
|         | Alfalfa |          |                                          |          |     |
| Jejunum | hay     | Negative | neurological signs                       | 8.61E-09 | 224 |
|         | Alfalfa |          |                                          |          |     |
| Jejunum | hay     | Negative | migration of blood cells                 | 1.10E-08 | 290 |
|         | Alfalfa |          |                                          |          |     |
| Jejunum | hay     | Negative | cell movement of phagocytes              | 1.29E-08 | 192 |
|         | Alfalfa |          |                                          |          |     |
| Jejunum | hay     | Negative | leukocyte migration                      | 1.41E-08 | 289 |
|         | Alfalfa |          |                                          |          |     |
| Jejunum | hay     | Negative | quantity of carbohydrate                 | 1.55E-08 | 182 |
|         | Alfalfa |          |                                          |          |     |
| Jejunum | hay     | Negative | neuromuscular disease                    | 1.55E-08 | 292 |
|         | Alfalfa |          |                                          |          |     |
| Jejunum | hay     | Negative | proliferation of connective tissue cells | 1.55E-08 | 205 |
| Jejunum | Alfalfa | Negative | homing of cells                          | 1.72E-08 | 194 |



|         |         |          |                                       |          |      |
|---------|---------|----------|---------------------------------------|----------|------|
|         | hay     |          |                                       |          |      |
|         | Alfalfa |          |                                       |          |      |
| Jejunum | hay     | Negative | Viral Infection                       | 1.89E-08 | 499  |
|         | Alfalfa |          |                                       |          |      |
| Jejunum | hay     | Negative | morphology of body cavity             | 2.29E-08 | 381  |
|         | Alfalfa |          |                                       |          |      |
| Jejunum | hay     | Negative | transactivation of RNA                | 2.44E-08 | 189  |
|         | Alfalfa |          |                                       |          |      |
| Jejunum | hay     | Negative | concentration of fatty acid           | 2.44E-08 | 106  |
|         | Alfalfa |          |                                       |          |      |
| Jejunum | hay     | Negative | formation of actin filaments          | 2.54E-08 | 114  |
|         | Alfalfa |          |                                       |          |      |
| Jejunum | hay     | Negative | digestive organ tumor                 | 3.02E-08 | 2084 |
|         | Alfalfa |          |                                       |          |      |
| Jejunum | hay     | Negative | development of cardiovascular tissue  | 3.94E-08 | 134  |
|         | Alfalfa |          |                                       |          |      |
| Jejunum | hay     | Negative | chemotaxis of cells                   | 4.15E-08 | 183  |
|         | Alfalfa |          |                                       |          |      |
| Jejunum | hay     | Negative | homing                                | 4.77E-08 | 197  |
|         | Alfalfa |          |                                       |          |      |
| Jejunum | hay     | Negative | cell movement of leukocytes           | 4.88E-08 | 255  |
|         | Alfalfa |          |                                       |          |      |
| Jejunum | hay     | Negative | digestive system cancer               | 5.27E-08 | 2063 |
|         | Alfalfa |          |                                       |          |      |
| Jejunum | hay     | Negative | Organ Degeneration                    | 5.44E-08 | 172  |
|         | Alfalfa |          |                                       |          |      |
| Jejunum | hay     | Negative | formation of actin stress fibers      | 6.05E-08 | 92   |
|         | Alfalfa |          |                                       |          |      |
| Jejunum | hay     | Negative | phosphorylation of protein            | 6.36E-08 | 245  |
|         | Alfalfa |          |                                       |          |      |
| Jejunum | hay     | Negative | cell death of connective tissue cells | 6.83E-08 | 205  |
|         | Alfalfa |          |                                       |          |      |
| Jejunum | hay     | Negative | apoptosis of tumor cell lines         | 8.24E-08 | 382  |
|         | Alfalfa |          |                                       |          |      |
| Jejunum | hay     | Negative | chemotaxis                            | 8.48E-08 | 187  |
|         | Alfalfa |          |                                       |          |      |
| Jejunum | hay     | Negative | Huntington's Disease                  | 8.49E-08 | 196  |
|         | Alfalfa |          |                                       |          |      |
| Jejunum | hay     | Negative | metabolism of carbohydrate            | 8.71E-08 | 210  |
|         | Alfalfa |          |                                       |          |      |
| Jejunum | hay     | Negative | abnormal morphology of body cavity    | 9.59E-08 | 362  |
|         | Alfalfa |          |                                       |          |      |
| Jejunum | hay     | Negative | migration of tumor cell lines         | 1.21E-07 | 235  |
| Jejunum | Alfalfa | Negative | development of endothelial tissue     | 1.21E-07 | 131  |

|         |         |          |                                        |          |     |
|---------|---------|----------|----------------------------------------|----------|-----|
|         | hay     |          |                                        |          |     |
|         | Alfalfa |          |                                        |          |     |
| Jejunum | hay     | Negative | development of body trunk              | 1.30E-07 | 354 |
|         | Alfalfa |          |                                        |          |     |
| Jejunum | hay     | Negative | endothelial cell development           | 1.31E-07 | 127 |
|         | Alfalfa |          |                                        |          |     |
| Jejunum | hay     | Negative | invasion of tumor cell lines           | 1.62E-07 | 222 |
|         | Alfalfa |          |                                        |          |     |
| Jejunum | hay     | Negative | morphology of cardiovascular system    | 1.88E-07 | 208 |
|         | Alfalfa |          |                                        |          |     |
| Jejunum | hay     | Negative | engulfment of cells                    | 1.97E-07 | 143 |
|         | Alfalfa |          |                                        |          |     |
| Jejunum | hay     | Negative | inflammatory response                  | 2.21E-07 | 255 |
|         | Alfalfa |          |                                        |          |     |
| Jejunum | hay     | Negative | seizure disorder                       | 2.45E-07 | 162 |
|         | Alfalfa |          |                                        |          |     |
| Jejunum | hay     | Negative | development of epithelial tissue       | 2.91E-07 | 176 |
|         | Alfalfa |          |                                        |          |     |
| Jejunum | hay     | Negative | endocytosis                            | 2.97E-07 | 123 |
|         | Alfalfa |          |                                        |          |     |
| Jejunum | hay     | Negative | secretory pathway                      | 3.58E-07 | 76  |
|         | Alfalfa |          |                                        |          |     |
| Jejunum | hay     | Negative | cell cycle progression                 | 4.38E-07 | 331 |
|         | Alfalfa |          |                                        |          |     |
| Jejunum | hay     | Negative | abnormal morphology of thoracic cavity | 5.22E-07 | 196 |
|         | Alfalfa |          |                                        |          |     |
| Jejunum | hay     | Negative | exocytosis                             | 7.02E-07 | 73  |
|         | Alfalfa |          |                                        |          |     |
| Jejunum | hay     | Negative | uptake of monosaccharide               | 7.15E-07 | 98  |
|         | Alfalfa |          |                                        |          |     |
| Jejunum | hay     | Negative | development of vasculature             | 8.95E-07 | 144 |
|         | Alfalfa |          |                                        |          |     |
| Jejunum | hay     | Negative | seizures                               | 9.16E-07 | 138 |
|         | Alfalfa |          |                                        |          |     |
| Jejunum | hay     | Negative | quantity of mononuclear leukocytes     | 9.17E-07 | 239 |
|         | Alfalfa |          |                                        |          |     |
| Jejunum | hay     | Negative | activation of DNA endogenous promoter  | 9.76E-07 | 375 |
|         | Alfalfa |          |                                        |          |     |
| Jejunum | hay     | Negative | degeneration of nervous system         | 1.06E-06 | 103 |
|         | Alfalfa |          |                                        |          |     |
| Jejunum | hay     | Negative | growth of organism                     | 1.09E-06 | 268 |
|         | Alfalfa |          |                                        |          |     |
| Jejunum | hay     | Negative | development of connective tissue       | 1.09E-06 | 129 |
| Jejunum | Alfalfa | Negative | necrosis of epithelial tissue          | 1.12E-06 | 195 |

|         |         |          |                                          |          |     |
|---------|---------|----------|------------------------------------------|----------|-----|
|         | hay     |          |                                          |          |     |
|         | Alfalfa |          |                                          |          |     |
| Jejunum | hay     | Negative | behavior                                 | 1.14E-06 | 312 |
|         | Alfalfa |          |                                          |          |     |
| Jejunum | hay     | Negative | long-term potentiation                   | 1.43E-06 | 89  |
|         | Alfalfa |          |                                          |          |     |
| Jejunum | hay     | Negative | proliferation of blood cells             | 1.51E-06 | 269 |
|         | Alfalfa |          |                                          |          |     |
| Jejunum | hay     | Negative | ion homeostasis of cells                 | 2.15E-06 | 184 |
|         | Alfalfa |          |                                          |          |     |
| Jejunum | hay     | Negative | invasion of carcinoma cell lines         | 2.28E-06 | 74  |
|         | Alfalfa |          |                                          |          |     |
| Jejunum | hay     | Negative | uptake of carbohydrate                   | 2.28E-06 | 103 |
|         | Alfalfa |          |                                          |          |     |
| Jejunum | hay     | Negative | learning                                 | 2.34E-06 | 142 |
|         | Alfalfa |          |                                          |          |     |
| Jejunum | hay     | Negative | cognition                                | 2.40E-06 | 153 |
|         | Alfalfa |          |                                          |          |     |
| Jejunum | hay     | Negative | function of leukocytes                   | 2.40E-06 | 178 |
|         | Alfalfa |          |                                          |          |     |
| Jejunum | hay     | Negative | perinatal death                          | 2.45E-06 | 195 |
|         | Alfalfa |          |                                          |          |     |
| Jejunum | hay     | Negative | interphase                               | 2.84E-06 | 213 |
|         | Alfalfa |          |                                          |          |     |
| Jejunum | hay     | Negative | quantity of lymphocytes                  | 2.90E-06 | 228 |
|         | Alfalfa |          |                                          |          |     |
| Jejunum | hay     | Negative | cell movement of fibroblasts             | 2.90E-06 | 69  |
|         | Alfalfa |          |                                          |          |     |
| Jejunum | hay     | Negative | hypersensitive reaction                  | 2.95E-06 | 145 |
|         | Alfalfa |          |                                          |          |     |
| Jejunum | hay     | Negative | formation of plasma membrane projections | 3.23E-06 | 195 |
|         | Alfalfa |          |                                          |          |     |
| Jejunum | hay     | Negative | neuritogenesis                           | 3.24E-06 | 191 |
|         | Alfalfa |          |                                          |          |     |
| Jejunum | hay     | Negative | cell movement of connective tissue cells | 3.76E-06 | 81  |
|         | Alfalfa |          |                                          |          |     |
| Jejunum | hay     | Negative | cell death of blood cells                | 4.18E-06 | 223 |
|         | Alfalfa |          |                                          |          |     |
| Jejunum | hay     | Negative | activation of cells                      | 4.50E-06 | 305 |
|         | Alfalfa |          |                                          |          |     |
| Jejunum | hay     | Negative | quantity of metal                        | 4.50E-06 | 165 |
|         | Alfalfa |          |                                          |          |     |
| Jejunum | hay     | Negative | morphology of heart                      | 4.55E-06 | 137 |
| Jejunum | Alfalfa | Negative | organization of actin cytoskeleton       | 4.65E-06 | 105 |

|         |         |          |                                              |          |     |
|---------|---------|----------|----------------------------------------------|----------|-----|
|         | hay     |          |                                              |          |     |
|         | Alfalfa |          |                                              |          |     |
| Jejunum | hay     | Negative | proliferation of neuronal cells              | 4.86E-06 | 188 |
|         | Alfalfa |          |                                              |          |     |
| Jejunum | hay     | Negative | reorganization of cytoskeleton               | 4.91E-06 | 71  |
|         | Alfalfa |          |                                              |          |     |
| Jejunum | hay     | Negative | chemotaxis of phagocytes                     | 5.17E-06 | 103 |
|         | Alfalfa |          |                                              |          |     |
| Jejunum | hay     | Negative | degeneration of cells                        | 5.30E-06 | 118 |
|         | Alfalfa |          |                                              |          |     |
| Jejunum | hay     | Negative | proliferation of immune cells                | 5.48E-06 | 251 |
|         | Alfalfa |          |                                              |          |     |
| Jejunum | hay     | Negative | cell death of epithelial cells               | 5.78E-06 | 164 |
|         | Alfalfa |          |                                              |          |     |
| Jejunum | hay     | Negative | abnormal morphology of cardiovascular system | 5.96E-06 | 185 |
|         | Alfalfa |          |                                              |          |     |
| Jejunum | hay     | Negative | cell movement of carcinoma cell lines        | 6.29E-06 | 75  |
|         | Alfalfa |          |                                              |          |     |
| Jejunum | hay     | Negative | Growth Failure                               | 6.37E-06 | 194 |
|         | Alfalfa |          |                                              |          |     |
| Jejunum | hay     | Negative | cell death of immune cells                   | 6.37E-06 | 212 |
|         | Alfalfa |          |                                              |          |     |
| Jejunum | hay     | Negative | differentiation of connective tissue cells   | 6.45E-06 | 207 |
|         | Alfalfa |          |                                              |          |     |
| Jejunum | hay     | Negative | uterine serous papillary cancer              | 6.45E-06 | 83  |
|         | Alfalfa |          |                                              |          |     |
| Jejunum | hay     | Negative | synthesis of carbohydrate                    | 6.81E-06 | 142 |
|         | Alfalfa |          |                                              |          |     |
| Jejunum | hay     | Negative | migration of connective tissue cells         | 7.52E-06 | 67  |
|         | Alfalfa |          |                                              |          |     |
| Jejunum | hay     | Negative | function of blood cells                      | 7.72E-06 | 190 |
|         | Alfalfa |          |                                              |          |     |
| Jejunum | hay     | Negative | colony formation                             | 8.31E-06 | 175 |
|         | Alfalfa |          |                                              |          |     |
| Jejunum | hay     | Negative | cell movement of granulocytes                | 8.76E-06 | 125 |
|         | Alfalfa |          |                                              |          |     |
| Jejunum | hay     | Negative | proliferation of endothelial cells           | 8.99E-06 | 107 |
|         | Alfalfa |          |                                              |          |     |
| Jejunum | hay     | Negative | cell death of fibroblast cell lines          | 9.48E-06 | 142 |
|         | Alfalfa |          |                                              |          |     |
| Jejunum | hay     | Negative | chemotaxis of myeloid cells                  | 9.80E-06 | 101 |
|         | Alfalfa |          |                                              |          |     |
| Jejunum | hay     | Negative | differentiation of connective tissue         | 1.14E-05 | 231 |
| Jejunum | Alfalfa | Negative | colony formation of cells                    | 1.16E-05 | 161 |

|         |         |          |                                           |          |     |
|---------|---------|----------|-------------------------------------------|----------|-----|
|         | hay     |          |                                           |          |     |
|         | Alfalfa |          |                                           |          |     |
| Jejunum | hay     | Negative | metabolism of nucleotide                  | 1.18E-05 | 145 |
|         | Alfalfa |          |                                           |          |     |
| Jejunum | hay     | Negative | morphology of head                        | 1.18E-05 | 273 |
|         | Alfalfa |          |                                           |          |     |
| Jejunum | hay     | Negative | influx of Ca <sup>2+</sup>                | 1.28E-05 | 68  |
|         | Alfalfa |          |                                           |          |     |
| Jejunum | hay     | Negative | cell movement of neutrophils              | 1.40E-05 | 102 |
|         | Alfalfa |          |                                           |          |     |
| Jejunum | hay     | Negative | influx of cation                          | 1.46E-05 | 70  |
|         | Alfalfa |          |                                           |          |     |
| Jejunum | hay     | Negative | long-term potentiation of synapse         | 1.49E-05 | 56  |
|         | Alfalfa |          |                                           |          |     |
| Jejunum | hay     | Negative | plasticity of synapse                     | 1.53E-05 | 47  |
|         | Alfalfa |          |                                           |          |     |
| Jejunum | hay     | Negative | dephosphorylation of protein              | 1.53E-05 | 68  |
|         | Alfalfa |          |                                           |          |     |
| Jejunum | hay     | Negative | quantity of connective tissue             | 1.64E-05 | 193 |
|         | Alfalfa |          |                                           |          |     |
| Jejunum | hay     | Negative | cell movement of macrophages              | 1.90E-05 | 92  |
|         | Alfalfa |          |                                           |          |     |
| Jejunum | hay     | Negative | fatty acid metabolism                     | 1.93E-05 | 192 |
|         | Alfalfa |          |                                           |          |     |
| Jejunum | hay     | Negative | Neurodegeneration                         | 1.95E-05 | 105 |
|         | Alfalfa |          |                                           |          |     |
| Jejunum | hay     | Negative | proliferation of mononuclear leukocytes   | 1.95E-05 | 232 |
|         | Alfalfa |          |                                           |          |     |
| Jejunum | hay     | Negative | accumulation of cells                     | 1.97E-05 | 118 |
|         | Alfalfa |          |                                           |          |     |
| Jejunum | hay     | Negative | female genital tract serous cancer        | 1.99E-05 | 128 |
|         | Alfalfa |          |                                           |          |     |
| Jejunum | hay     | Negative | growth of lesion                          | 2.03E-05 | 249 |
|         | Alfalfa |          |                                           |          |     |
| Jejunum | hay     | Negative | cell movement of antigen presenting cells | 2.08E-05 | 117 |
|         | Alfalfa |          |                                           |          |     |
| Jejunum | hay     | Negative | influx of inorganic cation                | 2.08E-05 | 69  |
|         | Alfalfa |          |                                           |          |     |
| Jejunum | hay     | Negative | quantity of metal ion                     | 2.15E-05 | 145 |
|         | Alfalfa |          |                                           |          |     |
| Jejunum | hay     | Negative | branching of cells                        | 2.20E-05 | 123 |
|         | Alfalfa |          |                                           |          |     |
| Jejunum | hay     | Negative | synthesis of nucleotide                   | 2.24E-05 | 121 |
| Jejunum | Alfalfa | Negative | secretion of molecule                     | 2.31E-05 | 177 |

|         |         |          |                                          |          |     |
|---------|---------|----------|------------------------------------------|----------|-----|
|         | hay     |          |                                          |          |     |
|         | Alfalfa |          |                                          |          |     |
| Jejunum | hay     | Negative | binding of DNA                           | 2.32E-05 | 168 |
|         | Alfalfa |          |                                          |          |     |
| Jejunum | hay     | Negative | formation of skin                        | 2.32E-05 | 122 |
|         | Alfalfa |          |                                          |          |     |
| Jejunum | hay     | Negative | activation of antigen presenting cells   | 2.41E-05 | 107 |
|         | Alfalfa |          |                                          |          |     |
| Jejunum | hay     | Negative | growth of tumor                          | 2.45E-05 | 248 |
|         | Alfalfa |          |                                          |          |     |
| Jejunum | hay     | Negative | proliferation of lymphocytes             | 2.49E-05 | 228 |
|         | Alfalfa |          |                                          |          |     |
| Jejunum | hay     | Negative | Dermatitis                               | 2.60E-05 | 142 |
|         | Alfalfa |          |                                          |          |     |
| Jejunum | hay     | Negative | metabolism of membrane lipid derivative  | 2.67E-05 | 128 |
|         | Alfalfa |          |                                          |          |     |
| Jejunum | hay     | Negative | killing of macrophages                   | 2.76E-05 | 12  |
|         | Alfalfa |          |                                          |          |     |
| Jejunum | hay     | Negative | concentration of acylglycerol            | 2.81E-05 | 112 |
|         | Alfalfa |          |                                          |          |     |
| Jejunum | hay     | Negative | growth of epithelial tissue              | 2.87E-05 | 214 |
|         | Alfalfa |          |                                          |          |     |
| Jejunum | hay     | Negative | allergy                                  | 2.87E-05 | 133 |
|         | Alfalfa |          |                                          |          |     |
| Jejunum | hay     | Negative | flux of ion                              | 3.25E-05 | 108 |
|         | Alfalfa |          |                                          |          |     |
| Jejunum | hay     | Negative | transport of carbohydrate                | 3.39E-05 | 69  |
|         | Alfalfa |          |                                          |          |     |
| Jejunum | hay     | Negative | morphology of lymphatic system component | 3.58E-05 | 136 |
|         | Alfalfa |          |                                          |          |     |
| Jejunum | hay     | Negative | demyelination                            | 3.64E-05 | 46  |
|         | Alfalfa |          |                                          |          |     |
| Jejunum | hay     | Negative | differentiation of muscle cell lines     | 3.75E-05 | 59  |
|         | Alfalfa |          |                                          |          |     |
| Jejunum | hay     | Negative | abnormal morphology of heart             | 3.80E-05 | 126 |
|         | Alfalfa |          |                                          |          |     |
| Jejunum | hay     | Negative | migration of fibroblasts                 | 3.97E-05 | 53  |
|         | Alfalfa |          |                                          |          |     |
| Jejunum | hay     | Negative | cell movement of endothelial cells       | 4.04E-05 | 117 |
|         | Alfalfa |          |                                          |          |     |
| Jejunum | hay     | Negative | quantity of Ca <sup>2+</sup>             | 4.42E-05 | 133 |
|         | Alfalfa |          |                                          |          |     |
| Jejunum | hay     | Negative | autophagy                                | 4.71E-05 | 123 |
| Jejunum | Alfalfa | Negative | formation of cells                       | 4.81E-05 | 299 |

|         |         |          |                                                    |          |     |
|---------|---------|----------|----------------------------------------------------|----------|-----|
|         | hay     |          |                                                    |          |     |
|         | Alfalfa |          |                                                    |          |     |
| Jejunum | hay     | Negative | organization of filaments                          | 4.86E-05 | 72  |
|         | Alfalfa |          |                                                    |          |     |
| Jejunum | hay     | Negative | growth of lymphatic system component               | 4.86E-05 | 68  |
|         | Alfalfa |          |                                                    |          |     |
| Jejunum | hay     | Negative | morphology of heart ventricle                      | 4.86E-05 | 68  |
|         | Alfalfa |          |                                                    |          |     |
| Jejunum | hay     | Negative | transport of protein                               | 5.06E-05 | 101 |
|         | Alfalfa |          |                                                    |          |     |
| Jejunum | hay     | Negative | morphology of muscle                               | 5.38E-05 | 111 |
|         | Alfalfa |          |                                                    |          |     |
| Jejunum | hay     | Negative | proliferation of smooth muscle cells               | 5.38E-05 | 96  |
|         | Alfalfa |          |                                                    |          |     |
| Jejunum | hay     | Negative | permeability of cells                              | 5.41E-05 | 39  |
|         | Alfalfa |          |                                                    |          |     |
| Jejunum | hay     | Negative | abnormal morphology of head                        | 5.54E-05 | 256 |
|         | Alfalfa |          |                                                    |          |     |
| Jejunum | hay     | Negative | quantity of myeloid cells                          | 5.59E-05 | 117 |
|         | Alfalfa |          |                                                    |          |     |
| Jejunum | hay     | Negative | dysmyelination                                     | 5.92E-05 | 50  |
|         | Alfalfa |          |                                                    |          |     |
| Jejunum | hay     | Negative | flux of cation                                     | 6.01E-05 | 102 |
|         | Alfalfa |          |                                                    |          |     |
| Jejunum | hay     | Negative | accumulation of blood cells                        | 6.02E-05 | 94  |
|         | Alfalfa |          |                                                    |          |     |
| Jejunum | hay     | Negative | growth of muscle tissue                            | 6.09E-05 | 122 |
|         | Alfalfa |          |                                                    |          |     |
| Jejunum | hay     | Negative | synthesis of DNA                                   | 6.21E-05 | 135 |
|         | Alfalfa |          |                                                    |          |     |
| Jejunum | hay     | Negative | metabolism of nucleic acid component or derivative | 6.24E-05 | 165 |
|         | Alfalfa |          |                                                    |          |     |
| Jejunum | hay     | Negative | transport of alpha-amino acid                      | 6.36E-05 | 30  |
|         | Alfalfa |          |                                                    |          |     |
| Jejunum | hay     | Negative | abnormal morphology of abdomen                     | 6.44E-05 | 268 |
|         | Alfalfa |          |                                                    |          |     |
| Jejunum | hay     | Negative | cell movement of muscle cells                      | 6.46E-05 | 64  |
|         | Alfalfa |          |                                                    |          |     |
| Jejunum | hay     | Negative | quantity of phagocytes                             | 6.48E-05 | 137 |
|         | Alfalfa |          |                                                    |          |     |
| Jejunum | hay     | Negative | ubiquitination                                     | 6.53E-05 | 111 |
|         | Alfalfa |          |                                                    |          |     |
| Jejunum | hay     | Negative | development of neurons                             | 6.70E-05 | 241 |
| Jejunum | Alfalfa | Negative | quantity of lymphatic system component             | 6.88E-05 | 123 |

|         |         |          |                                      |          |     |
|---------|---------|----------|--------------------------------------|----------|-----|
|         | hay     |          |                                      |          |     |
|         | Alfalfa |          |                                      |          |     |
| Jejunum | hay     | Negative | activation of leukocytes             | 6.96E-05 | 217 |
|         | Alfalfa |          |                                      |          |     |
| Jejunum | hay     | Negative | hydrolysis of lipid                  | 6.99E-05 | 66  |
|         | Alfalfa |          |                                      |          |     |
| Jejunum | hay     | Negative | concentration of phosphatidic acid   | 6.99E-05 | 50  |
|         | Alfalfa |          |                                      |          |     |
| Jejunum | hay     | Negative | proliferation of muscle cells        | 7.01E-05 | 121 |
|         | Alfalfa |          |                                      |          |     |
| Jejunum | hay     | Negative | cellular infiltration by macrophages | 7.78E-05 | 57  |
|         | Alfalfa |          |                                      |          |     |
| Jejunum | hay     | Negative | transport of monosaccharide          | 7.78E-05 | 57  |
|         | Alfalfa |          |                                      |          |     |
| Jejunum | hay     | Negative | cell death of brain                  | 7.97E-05 | 97  |
|         | Alfalfa |          |                                      |          |     |
| Jejunum | hay     | Negative | flux of Ca <sup>2+</sup>             | 7.97E-05 | 95  |
|         | Alfalfa |          |                                      |          |     |
| Jejunum | hay     | Negative | benign neoplasia                     | 8.18E-05 | 281 |
|         | Alfalfa |          |                                      |          |     |
| Jejunum | hay     | Negative | ubiquitination of protein            | 8.22E-05 | 109 |
|         | Alfalfa |          |                                      |          |     |
| Jejunum | hay     | Negative | receptor-mediated endocytosis        | 8.26E-05 | 53  |
|         | Alfalfa |          |                                      |          |     |
| Jejunum | hay     | Negative | flux of inorganic cation             | 8.26E-05 | 100 |
|         | Alfalfa |          |                                      |          |     |
| Jejunum | hay     | Negative | homing of blood cells                | 8.26E-05 | 123 |
|         | Alfalfa |          |                                      |          |     |
| Jejunum | hay     | Negative | export of molecule                   | 8.27E-05 | 98  |
|         | Alfalfa |          |                                      |          |     |
| Jejunum | hay     | Negative | neurotransmission                    | 8.27E-05 | 133 |
|         | Alfalfa |          |                                      |          |     |
| Jejunum | hay     | Negative | release of fatty acid                | 8.31E-05 | 60  |
|         | Alfalfa |          |                                      |          |     |
| Jejunum | hay     | Negative | transport of cation                  | 8.31E-05 | 130 |
|         | Alfalfa |          |                                      |          |     |
| Jejunum | hay     | Negative | sprouting                            | 8.73E-05 | 125 |
|         | Alfalfa |          |                                      |          |     |
| Jejunum | hay     | Negative | adhesion of immune cells             | 8.91E-05 | 114 |
|         | Alfalfa |          |                                      |          |     |
| Jejunum | hay     | Negative | development of body axis             | 9.12E-05 | 316 |
|         | Alfalfa |          |                                      |          |     |
| Jejunum | hay     | Negative | degeneration of neurons              | 9.30E-05 | 81  |
| Jejunum | Alfalfa | Negative | cell death of epithelial cell lines  | 9.30E-05 | 94  |



|         |         |          |                                     |          |     |
|---------|---------|----------|-------------------------------------|----------|-----|
|         | hay     |          |                                     |          |     |
|         | Alfalfa |          |                                     |          |     |
| Jejunum | hay     | Negative | experimentally-induced diabetes     | 9.55E-05 | 37  |
|         | Alfalfa |          |                                     |          |     |
| Jejunum | hay     | Negative | cell death of hippocampal neurons   | 9.91E-05 | 34  |
|         | Alfalfa |          |                                     |          |     |
| Jejunum | hay     | Negative | concentration of phospholipid       | 1.01E-04 | 64  |
|         | Alfalfa |          |                                     |          |     |
| Jejunum | hay     | Negative | metastasis of cells                 | 1.02E-04 | 84  |
|         | Alfalfa |          |                                     |          |     |
| Jejunum | hay     | Negative | morphology of nervous system        | 1.03E-04 | 240 |
|         | Alfalfa |          |                                     |          |     |
| Jejunum | hay     | Negative | cellular infiltration by leukocytes | 1.06E-04 | 125 |
|         | Alfalfa |          |                                     |          |     |
| Jejunum | hay     | Negative | transmigration of cells             | 1.10E-04 | 56  |
|         | Alfalfa |          |                                     |          |     |
| Jejunum | hay     | Negative | cognitive impairment                | 1.20E-04 | 108 |
|         | Alfalfa |          |                                     |          |     |
| Jejunum | hay     | Negative | metabolism of protein               | 1.20E-04 | 293 |
|         | Alfalfa |          |                                     |          |     |
| Jejunum | hay     | Negative | epileptic seizure                   | 1.20E-04 | 59  |
|         | Alfalfa |          |                                     |          |     |
| Jejunum | hay     | Negative | epilepsy                            | 1.20E-04 | 101 |
|         | Alfalfa |          |                                     |          |     |
| Jejunum | hay     | Negative | release of eicosanoid               | 1.20E-04 | 51  |
|         | Alfalfa |          |                                     |          |     |
| Jejunum | hay     | Negative | cell death of hippocampal cells     | 1.22E-04 | 37  |
|         | Alfalfa |          |                                     |          |     |
| Jejunum | hay     | Negative | hydrolysis of phosphoinositide      | 1.23E-04 | 25  |
|         | Alfalfa |          |                                     |          |     |
| Jejunum | hay     | Negative | infection by RNA virus              | 1.23E-04 | 263 |
|         | Alfalfa |          |                                     |          |     |
| Jejunum | hay     | Negative | cellular degradation                | 1.23E-04 | 85  |
|         | Alfalfa |          |                                     |          |     |
| Jejunum | hay     | Negative | morphology of bone                  | 1.23E-04 | 143 |
|         | Alfalfa |          |                                     |          |     |
| Jejunum | hay     | Negative | cell death of lymphocytes           | 1.23E-04 | 124 |
|         | Alfalfa |          |                                     |          |     |
| Jejunum | hay     | Negative | abnormal morphology of bone         | 1.23E-04 | 139 |
|         | Alfalfa |          |                                     |          |     |
| Jejunum | hay     | Negative | apoptosis of fibroblast cell lines  | 1.23E-04 | 107 |
|         | Alfalfa |          |                                     |          |     |
| Jejunum | hay     | Negative | migration of endothelial cells      | 1.23E-04 | 107 |
| Jejunum | Alfalfa | Negative | activation of blood cells           | 1.23E-04 | 229 |

|         |         |          |                                            |          |     |
|---------|---------|----------|--------------------------------------------|----------|-----|
|         | hay     |          |                                            |          |     |
|         | Alfalfa |          |                                            |          |     |
| Jejunum | hay     | Negative | uptake of D-glucose                        | 1.23E-04 | 75  |
|         | Alfalfa |          |                                            |          |     |
| Jejunum | hay     | Negative | cell death of heart                        | 1.28E-04 | 77  |
|         | Alfalfa |          |                                            |          |     |
| Jejunum | hay     | Negative | cell death of T lymphocytes                | 1.28E-04 | 103 |
|         | Alfalfa |          |                                            |          |     |
| Jejunum | hay     | Negative | transport of ion                           | 1.33E-04 | 159 |
|         | Alfalfa |          |                                            |          |     |
| Jejunum | hay     | Negative | cancer of cells                            | 1.37E-04 | 85  |
|         | Alfalfa |          |                                            |          |     |
| Jejunum | hay     | Negative | apoptosis of blood cells                   | 1.38E-04 | 156 |
|         | Alfalfa |          |                                            |          |     |
| Jejunum | hay     | Negative | migration of muscle cells                  | 1.41E-04 | 58  |
|         | Alfalfa |          |                                            |          |     |
| Jejunum | hay     | Negative | differentiation of bone cells              | 1.42E-04 | 130 |
|         | Alfalfa |          |                                            |          |     |
| Jejunum | hay     | Negative | cell death of central nervous system cells | 1.43E-04 | 96  |
|         | Alfalfa |          |                                            |          |     |
| Jejunum | hay     | Negative | replication of RNA virus                   | 1.43E-04 | 159 |
|         | Alfalfa |          |                                            |          |     |
| Jejunum | hay     | Negative | cell death of mononuclear leukocytes       | 1.43E-04 | 127 |
|         | Alfalfa |          |                                            |          |     |
| Jejunum | hay     | Negative | formation of muscle                        | 1.43E-04 | 127 |
|         | Alfalfa |          |                                            |          |     |
| Jejunum | hay     | Negative | homing of leukocytes                       | 1.47E-04 | 121 |
|         | Alfalfa |          |                                            |          |     |
| Jejunum | hay     | Negative | abnormal morphology of heart ventricle     | 1.48E-04 | 61  |
|         | Alfalfa |          |                                            |          |     |
| Jejunum | hay     | Negative | release of neurotransmitter                | 1.52E-04 | 55  |
|         | Alfalfa |          |                                            |          |     |
| Jejunum | hay     | Negative | transport of metal                         | 1.56E-04 | 108 |
|         | Alfalfa |          |                                            |          |     |
| Jejunum | hay     | Negative | arthropathy                                | 1.70E-04 | 286 |
|         | Alfalfa |          |                                            |          |     |
| Jejunum | hay     | Negative | development of head                        | 1.70E-04 | 294 |
|         | Alfalfa |          |                                            |          |     |
| Jejunum | hay     | Negative | infection by Retroviridae                  | 1.70E-04 | 220 |
|         | Alfalfa |          |                                            |          |     |
| Jejunum | hay     | Negative | HIV infection                              | 1.70E-04 | 218 |
|         | Alfalfa |          |                                            |          |     |
| Jejunum | hay     | Negative | chemotaxis of leukocytes                   | 1.75E-04 | 114 |
| Jejunum | Alfalfa | Negative | morphology of lymphoid organ               | 1.81E-04 | 125 |

|         |         |          |                                              |          |     |
|---------|---------|----------|----------------------------------------------|----------|-----|
|         | hay     |          |                                              |          |     |
|         | Alfalfa |          |                                              |          |     |
| Jejunum | hay     | Negative | syndromic mental retardation                 | 1.81E-04 | 55  |
|         | Alfalfa |          |                                              |          |     |
| Jejunum | hay     | Negative | morphology of connective tissue              | 1.93E-04 | 145 |
|         | Alfalfa |          |                                              |          |     |
| Jejunum | hay     | Negative | cell death of heart cells                    | 1.96E-04 | 74  |
|         | Alfalfa |          |                                              |          |     |
| Jejunum | hay     | Negative | arthritis                                    | 1.96E-04 | 281 |
|         | Alfalfa |          |                                              |          |     |
| Jejunum | hay     | Negative | abnormal morphology of nervous system        | 2.09E-04 | 221 |
|         | Alfalfa |          |                                              |          |     |
| Jejunum | hay     | Negative | transport of inorganic cation                | 2.09E-04 | 113 |
|         | Alfalfa |          |                                              |          |     |
| Jejunum | hay     | Negative | S phase                                      | 2.10E-04 | 86  |
|         | Alfalfa |          |                                              |          |     |
| Jejunum | hay     | Negative | neutropenia                                  | 2.10E-04 | 19  |
|         | Alfalfa |          |                                              |          |     |
| Jejunum | hay     | Negative | apoptosis of epithelial cell lines           | 2.10E-04 | 75  |
|         | Alfalfa |          |                                              |          |     |
| Jejunum | hay     | Negative | serous neoplasm                              | 2.10E-04 | 188 |
|         | Alfalfa |          |                                              |          |     |
| Jejunum | hay     | Negative | I-kappaB kinase/NF-kappaB cascade            | 2.10E-04 | 60  |
|         | Alfalfa |          |                                              |          |     |
| Jejunum | hay     | Negative | production of reactive oxygen species        | 2.11E-04 | 117 |
|         | Alfalfa |          |                                              |          |     |
| Jejunum | hay     | Negative | concentration of eicosanoid                  | 2.11E-04 | 42  |
|         | Alfalfa |          |                                              |          |     |
| Jejunum | hay     | Negative | quantity of B lymphocytes                    | 2.11E-04 | 111 |
|         | Alfalfa |          |                                              |          |     |
| Jejunum | hay     | Negative | concentration of Ca <sup>2+</sup>            | 2.11E-04 | 46  |
|         | Alfalfa |          |                                              |          |     |
| Jejunum | hay     | Negative | small GTPase mediated signal transduction    | 2.14E-04 | 63  |
|         | Alfalfa |          |                                              |          |     |
| Jejunum | hay     | Negative | release of arachidonic acid                  | 2.14E-04 | 35  |
|         | Alfalfa |          |                                              |          |     |
| Jejunum | hay     | Negative | mitosis                                      | 2.17E-04 | 155 |
|         | Alfalfa |          |                                              |          |     |
| Jejunum | hay     | Negative | cell viability of cervical cancer cell lines | 2.17E-04 | 74  |
|         | Alfalfa |          |                                              |          |     |
| Jejunum | hay     | Negative | synthesis of fatty acid                      | 2.18E-04 | 101 |
|         | Alfalfa |          |                                              |          |     |
| Jejunum | hay     | Negative | proliferation of fibroblasts                 | 2.23E-04 | 113 |
| Jejunum | Alfalfa | Negative | mass of connective tissue                    | 2.24E-04 | 68  |

|         |         |          |                                           |          |     |
|---------|---------|----------|-------------------------------------------|----------|-----|
|         | hay     |          |                                           |          |     |
|         | Alfalfa |          |                                           |          |     |
| Jejunum | hay     | Negative | proliferation of lymphatic system cells   | 2.24E-04 | 68  |
|         | Alfalfa |          |                                           |          |     |
| Jejunum | hay     | Negative | accumulation of lipid                     | 2.26E-04 | 97  |
|         | Alfalfa |          |                                           |          |     |
| Jejunum | hay     | Negative | development of blood cells                | 2.28E-04 | 200 |
|         | Alfalfa |          |                                           |          |     |
| Jejunum | hay     | Negative | development of lymphatic system component | 2.31E-04 | 100 |
|         | Alfalfa |          |                                           |          |     |
| Jejunum | hay     | Negative | proliferation of T lymphocytes            | 2.34E-04 | 186 |
|         | Alfalfa |          |                                           |          |     |
| Jejunum | hay     | Negative | homeostasis of ion                        | 2.40E-04 | 79  |
|         | Alfalfa |          |                                           |          |     |
| Jejunum | hay     | Negative | quantity of steroid                       | 2.43E-04 | 146 |
|         | Alfalfa |          |                                           |          |     |
| Jejunum | hay     | Negative | binding of endothelial cells              | 2.43E-04 | 39  |
|         | Alfalfa |          |                                           |          |     |
| Jejunum | hay     | Negative | infection of cells                        | 2.46E-04 | 241 |
|         | Alfalfa |          |                                           |          |     |
| Jejunum | hay     | Negative | degeneration of central nervous system    | 2.47E-04 | 47  |
|         | Alfalfa |          |                                           |          |     |
| Jejunum | hay     | Negative | apoptosis of neurons                      | 2.47E-04 | 137 |
|         | Alfalfa |          |                                           |          |     |
| Jejunum | hay     | Negative | maturation of cells                       | 2.51E-04 | 143 |
|         | Alfalfa |          |                                           |          |     |
| Jejunum | hay     | Negative | growth of embryo                          | 2.51E-04 | 149 |
|         | Alfalfa |          |                                           |          |     |
| Jejunum | hay     | Negative | quantity of hematopoietic cells           | 2.55E-04 | 139 |
|         | Alfalfa |          |                                           |          |     |
| Jejunum | hay     | Negative | experimentally-induced arthritis          | 2.57E-04 | 53  |
|         | Alfalfa |          |                                           |          |     |
| Jejunum | hay     | Negative | neurodegeneration of cerebral cortex      | 2.58E-04 | 24  |
|         | Alfalfa |          |                                           |          |     |
| Jejunum | hay     | Negative | proliferation of glomerular cells         | 2.58E-04 | 24  |
|         | Alfalfa |          |                                           |          |     |
| Jejunum | hay     | Negative | proliferation of mesangial cells          | 2.59E-04 | 21  |
|         | Alfalfa |          |                                           |          |     |
| Jejunum | hay     | Negative | size of animal                            | 2.62E-04 | 61  |
|         | Alfalfa |          |                                           |          |     |
| Jejunum | hay     | Negative | cell death of brain cells                 | 2.63E-04 | 89  |
|         | Alfalfa |          |                                           |          |     |
| Jejunum | hay     | Negative | homeostasis of inorganic cation           | 2.65E-04 | 64  |
| Jejunum | Alfalfa | Negative | apoptosis of leukocytes                   | 2.68E-04 | 143 |

|         |         |          |                                            |          |     |
|---------|---------|----------|--------------------------------------------|----------|-----|
|         | hay     |          |                                            |          |     |
|         | Alfalfa |          |                                            |          |     |
| Jejunum | hay     | Negative | synaptic transmission                      | 2.74E-04 | 108 |
|         | Alfalfa |          |                                            |          |     |
| Jejunum | hay     | Negative | development of leukocytes                  | 2.77E-04 | 181 |
|         | Alfalfa |          |                                            |          |     |
| Jejunum | hay     | Negative | cell death of cerebral cortex cells        | 2.77E-04 | 76  |
|         | Alfalfa |          |                                            |          |     |
| Jejunum | hay     | Negative | formation of leukocytes                    | 2.81E-04 | 55  |
|         | Alfalfa |          |                                            |          |     |
| Jejunum | hay     | Negative | activation of neuroglia                    | 2.92E-04 | 47  |
|         | Alfalfa |          |                                            |          |     |
| Jejunum | hay     | Negative | proliferation of fibroblast cell lines     | 2.93E-04 | 133 |
|         | Alfalfa |          |                                            |          |     |
| Jejunum | hay     | Negative | modification of peptide                    | 2.95E-04 | 39  |
|         | Alfalfa |          |                                            |          |     |
| Jejunum | hay     | Negative | abnormal morphology of embryonic tissue    | 2.99E-04 | 169 |
|         | Alfalfa |          |                                            |          |     |
| Jejunum | hay     | Negative | muscle contraction                         | 2.99E-04 | 81  |
|         | Alfalfa |          |                                            |          |     |
| Jejunum | hay     | Negative | quantity of bone                           | 2.99E-04 | 81  |
|         | Alfalfa |          |                                            |          |     |
| Jejunum | hay     | Negative | metabolism of monosaccharide               | 2.99E-04 | 44  |
|         | Alfalfa |          |                                            |          |     |
| Jejunum | hay     | Negative | activation of phagocytes                   | 2.99E-04 | 118 |
|         | Alfalfa |          |                                            |          |     |
| Jejunum | hay     | Negative | cellular infiltration                      | 3.12E-04 | 137 |
|         | Alfalfa |          |                                            |          |     |
| Jejunum | hay     | Negative | neovascularization                         | 3.16E-04 | 56  |
|         | Alfalfa |          |                                            |          |     |
| Jejunum | hay     | Negative | quantity of hematopoietic progenitor cells | 3.16E-04 | 138 |
|         | Alfalfa |          |                                            |          |     |
| Jejunum | hay     | Negative | Bleeding                                   | 3.16E-04 | 133 |
|         | Alfalfa |          |                                            |          |     |
| Jejunum | hay     | Negative | aggregation of cells                       | 3.19E-04 | 104 |
|         | Alfalfa |          |                                            |          |     |
| Jejunum | hay     | Negative | function of cardiovascular system          | 3.19E-04 | 117 |
|         | Alfalfa |          |                                            |          |     |
| Jejunum | hay     | Negative | accumulation of leukocytes                 | 3.29E-04 | 87  |
|         | Alfalfa |          |                                            |          |     |
| Jejunum | hay     | Negative | quantity of T lymphocytes                  | 3.35E-04 | 165 |
|         | Alfalfa |          |                                            |          |     |
| Jejunum | hay     | Negative | growth of renal glomerulus                 | 3.36E-04 | 28  |
| Jejunum | Alfalfa | Negative | cleavage of lipid                          | 3.43E-04 | 67  |

|         |         |          |                                       |          |     |
|---------|---------|----------|---------------------------------------|----------|-----|
|         | hay     |          |                                       |          |     |
|         | Alfalfa |          |                                       |          |     |
| Jejunum | hay     | Negative | autophagy of cells                    | 3.50E-04 | 86  |
|         | Alfalfa |          |                                       |          |     |
| Jejunum | hay     | Negative | transport of L-amino acid             | 3.52E-04 | 26  |
|         | Alfalfa |          |                                       |          |     |
| Jejunum | hay     | Negative | excitatory postsynaptic potential     | 3.60E-04 | 44  |
|         | Alfalfa |          |                                       |          |     |
| Jejunum | hay     | Negative | transport of metal ion                | 3.64E-04 | 102 |
|         | Alfalfa |          |                                       |          |     |
| Jejunum | hay     | Negative | differentiation of muscle             | 3.72E-04 | 97  |
|         | Alfalfa |          |                                       |          |     |
| Jejunum | hay     | Negative | development of lymphocytes            | 3.72E-04 | 170 |
|         | Alfalfa |          |                                       |          |     |
| Jejunum | hay     | Negative | advanced malignant tumor              | 3.82E-04 | 253 |
|         | Alfalfa |          |                                       |          |     |
| Jejunum | hay     | Negative | chronic psoriasis                     | 3.82E-04 | 50  |
|         | Alfalfa |          |                                       |          |     |
| Jejunum | hay     | Negative | concentration of sterol               | 3.85E-04 | 98  |
|         | Alfalfa |          |                                       |          |     |
| Jejunum | hay     | Negative | quantity of granulocytes              | 3.88E-04 | 101 |
|         | Alfalfa |          |                                       |          |     |
| Jejunum | hay     | Negative | intracranial hemorrhage               | 3.91E-04 | 49  |
|         | Alfalfa |          |                                       |          |     |
| Jejunum | hay     | Negative | migration of carcinoma cell lines     | 3.93E-04 | 58  |
|         | Alfalfa |          |                                       |          |     |
| Jejunum | hay     | Negative | cell transformation                   | 3.96E-04 | 143 |
|         | Alfalfa |          |                                       |          |     |
| Jejunum | hay     | Negative | apoptosis of kidney cell lines        | 3.97E-04 | 78  |
|         | Alfalfa |          |                                       |          |     |
| Jejunum | hay     | Negative | development of mononuclear leukocytes | 3.97E-04 | 171 |
|         | Alfalfa |          |                                       |          |     |
| Jejunum | hay     | Negative | entrance of Ca <sup>2+</sup>          | 3.97E-04 | 30  |
|         | Alfalfa |          |                                       |          |     |
| Jejunum | hay     | Negative | abnormal morphology of lymphoid organ | 3.97E-04 | 119 |
|         | Alfalfa |          |                                       |          |     |
| Jejunum | hay     | Negative | replication of virus                  | 3.97E-04 | 172 |
|         | Alfalfa |          |                                       |          |     |
| Jejunum | hay     | Negative | cell death of tumor                   | 4.05E-04 | 120 |
|         | Alfalfa |          |                                       |          |     |
| Jejunum | hay     | Negative | oxidative stress response of cells    | 4.05E-04 | 25  |
|         | Alfalfa |          |                                       |          |     |
| Jejunum | hay     | Negative | concentration of triacylglycerol      | 4.22E-04 | 98  |
| Jejunum | Alfalfa | Negative | proliferation of leukemia cell lines  | 4.30E-04 | 70  |

|         |         |          |                                         |          |     |
|---------|---------|----------|-----------------------------------------|----------|-----|
|         | hay     |          |                                         |          |     |
|         | Alfalfa |          |                                         |          |     |
| Jejunum | hay     | Negative | abnormal quantity of lipid              | 4.32E-04 | 51  |
|         | Alfalfa |          |                                         |          |     |
| Jejunum | hay     | Negative | homeostasis of metal ion                | 4.33E-04 | 62  |
|         | Alfalfa |          |                                         |          |     |
| Jejunum | hay     | Negative | development of abdomen                  | 4.34E-04 | 177 |
|         | Alfalfa |          |                                         |          |     |
| Jejunum | hay     | Negative | neurodegeneration of brain              | 4.34E-04 | 40  |
|         | Alfalfa |          |                                         |          |     |
| Jejunum | hay     | Negative | inflammation of organ                   | 4.40E-04 | 344 |
|         | Alfalfa |          |                                         |          |     |
| Jejunum | hay     | Negative | serine phosphorylation of peptide       | 4.48E-04 | 32  |
|         | Alfalfa |          |                                         |          |     |
| Jejunum | hay     | Negative | cell movement of mononuclear leukocytes | 4.59E-04 | 143 |
|         | Alfalfa |          |                                         |          |     |
| Jejunum | hay     | Negative | growth of neurites                      | 4.59E-04 | 143 |
|         | Alfalfa |          |                                         |          |     |
| Jejunum | hay     | Negative | phagocytosis                            | 4.59E-04 | 95  |
|         | Alfalfa |          |                                         |          |     |
| Jejunum | hay     | Negative | vascularization                         | 4.70E-04 | 77  |
|         | Alfalfa |          |                                         |          |     |
| Jejunum | hay     | Negative | consumption of oxygen                   | 4.70E-04 | 53  |
|         | Alfalfa |          |                                         |          |     |
| Jejunum | hay     | Negative | concentration of cholesterol            | 4.70E-04 | 93  |
|         | Alfalfa |          |                                         |          |     |
| Jejunum | hay     | Negative | assembly of protein-protein complex     | 4.70E-04 | 63  |
|         | Alfalfa |          |                                         |          |     |
| Jejunum | hay     | Negative | morphology of respiratory system        | 4.78E-04 | 99  |
|         | Alfalfa |          |                                         |          |     |
| Jejunum | hay     | Negative | abnormal morphology of skull            | 4.90E-04 | 72  |
|         | Alfalfa |          |                                         |          |     |
| Jejunum | hay     | Negative | differentiation of epithelial tissue    | 4.90E-04 | 113 |
|         | Alfalfa |          |                                         |          |     |
| Jejunum | hay     | Negative | branching of neurites                   | 4.90E-04 | 89  |
|         | Alfalfa |          |                                         |          |     |
| Jejunum | hay     | Negative | serine phosphorylation                  | 4.96E-04 | 35  |
|         | Alfalfa |          |                                         |          |     |
| Jejunum | hay     | Negative | cell death of kidney cells              | 4.96E-04 | 110 |
|         | Alfalfa |          |                                         |          |     |
| Jejunum | hay     | Negative | growth of plasma membrane projections   | 4.96E-04 | 144 |
|         | Alfalfa |          |                                         |          |     |
| Jejunum | hay     | Negative | cell viability of blood cells           | 4.96E-04 | 92  |
| Jejunum | Alfalfa | Negative | adhesion of blood cells                 | 4.98E-04 | 118 |

|         |         |          |                                           |          |     |
|---------|---------|----------|-------------------------------------------|----------|-----|
|         | hay     |          |                                           |          |     |
|         | Alfalfa |          |                                           |          |     |
| Jejunum | hay     | Negative | degeneration of brain                     | 5.01E-04 | 44  |
|         | Alfalfa |          |                                           |          |     |
| Jejunum | hay     | Negative | necrosis of tumor                         | 5.07E-04 | 119 |
|         | Alfalfa |          |                                           |          |     |
| Jejunum | hay     | Negative | peripheral vascular disease               | 5.07E-04 | 119 |
|         | Alfalfa |          |                                           |          |     |
| Jejunum | hay     | Negative | abnormal morphology of right ventricle    | 5.09E-04 | 21  |
|         | Alfalfa |          |                                           |          |     |
| Jejunum | hay     | Negative | homeostasis of divalent cations           | 5.11E-04 | 50  |
|         | Alfalfa |          |                                           |          |     |
| Jejunum | hay     | Negative | proliferation of hematopoietic cell lines | 5.15E-04 | 73  |
|         | Alfalfa |          |                                           |          |     |
| Jejunum | hay     | Negative | development of lymphatic system           | 5.15E-04 | 112 |
|         | Alfalfa |          |                                           |          |     |
| Jejunum | hay     | Negative | neonatal death                            | 5.21E-04 | 136 |
|         | Alfalfa |          |                                           |          |     |
| Jejunum | hay     | Negative | mass of adipose tissue                    | 5.30E-04 | 63  |
|         | Alfalfa |          |                                           |          |     |
| Jejunum | hay     | Negative | morphology of right ventricle             | 5.37E-04 | 23  |
|         | Alfalfa |          |                                           |          |     |
| Jejunum | hay     | Negative | phosphorylation of L-amino acid           | 5.45E-04 | 72  |
|         | Alfalfa |          |                                           |          |     |
| Jejunum | hay     | Negative | cell movement of lymphocytes              | 5.45E-04 | 123 |
|         | Alfalfa |          |                                           |          |     |
| Jejunum | hay     | Negative | mobilization of cells                     | 5.54E-04 | 32  |
|         | Alfalfa |          |                                           |          |     |
| Jejunum | hay     | Negative | vascularization of body region            | 5.55E-04 | 47  |
|         | Alfalfa |          |                                           |          |     |
| Jejunum | hay     | Negative | synthesis of phospholipid                 | 5.58E-04 | 59  |
|         | Alfalfa |          |                                           |          |     |
| Jejunum | hay     | Negative | homeostasis of leukocytes                 | 5.86E-04 | 169 |
|         | Alfalfa |          |                                           |          |     |
| Jejunum | hay     | Negative | necrosis of kidney                        | 5.93E-04 | 114 |
|         | Alfalfa |          |                                           |          |     |
| Jejunum | hay     | Negative | autophosphorylation of protein            | 6.06E-04 | 54  |
|         | Alfalfa |          |                                           |          |     |
| Jejunum | hay     | Negative | quantity of polyunsaturated fatty acids   | 6.07E-04 | 43  |
|         | Alfalfa |          |                                           |          |     |
| Jejunum | hay     | Negative | morphology of skin                        | 6.11E-04 | 87  |
|         | Alfalfa |          |                                           |          |     |
| Jejunum | hay     | Negative | metastasis                                | 6.28E-04 | 227 |
| Jejunum | Alfalfa | Negative | cell death of kidney cell lines           | 6.35E-04 | 96  |



|         |         |          |                                           |          |     |
|---------|---------|----------|-------------------------------------------|----------|-----|
|         | hay     |          |                                           |          |     |
|         | Alfalfa |          |                                           |          |     |
| Jejunum | hay     | Negative | muscular hypertrophy                      | 6.39E-04 | 67  |
|         | Alfalfa |          |                                           |          |     |
| Jejunum | hay     | Negative | activation of Protein kinase              | 6.43E-04 | 81  |
|         | Alfalfa |          |                                           |          |     |
| Jejunum | hay     | Negative | cellular infiltration of phagocytes       | 6.46E-04 | 59  |
|         | Alfalfa |          |                                           |          |     |
| Jejunum | hay     | Negative | branching of neurons                      | 6.46E-04 | 91  |
|         | Alfalfa |          |                                           |          |     |
| Jejunum | hay     | Negative | necrosis of cardiac muscle                | 6.50E-04 | 71  |
|         | Alfalfa |          |                                           |          |     |
| Jejunum | hay     | Negative | activation of macrophages                 | 6.50E-04 | 77  |
|         | Alfalfa |          |                                           |          |     |
| Jejunum | hay     | Negative | abnormal morphology of respiratory system | 6.50E-04 | 97  |
|         | Alfalfa |          |                                           |          |     |
| Jejunum | hay     | Negative | autosomal recessive disease               | 6.50E-04 | 272 |
|         | Alfalfa |          |                                           |          |     |
| Jejunum | hay     | Negative | synthesis of purine nucleotide            | 6.75E-04 | 58  |
|         | Alfalfa |          |                                           |          |     |
| Jejunum | hay     | Negative | recruitment of leukocytes                 | 6.92E-04 | 102 |
|         | Alfalfa |          |                                           |          |     |
| Jejunum | hay     | Negative | quantity of antigen presenting cells      | 7.08E-04 | 88  |
|         | Alfalfa |          |                                           |          |     |
| Jejunum | hay     | Negative | exocytosis by cells                       | 7.09E-04 | 44  |
|         | Alfalfa |          |                                           |          |     |
| Jejunum | hay     | Negative | cell viability of mononuclear leukocytes  | 7.09E-04 | 65  |
|         | Alfalfa |          |                                           |          |     |
| Jejunum | hay     | Negative | outgrowth of neurites                     | 7.27E-04 | 125 |
|         | Alfalfa |          |                                           |          |     |
| Jejunum | hay     | Negative | transport of D-glucose                    | 7.27E-04 | 49  |
|         | Alfalfa |          |                                           |          |     |
| Jejunum | hay     | Negative | morphogenesis of neurons                  | 7.29E-04 | 131 |
|         | Alfalfa |          |                                           |          |     |
| Jejunum | hay     | Negative | migration of mesenchymal cells            | 7.61E-04 | 17  |
|         | Alfalfa |          |                                           |          |     |
| Jejunum | hay     | Negative | chemotaxis of antigen presenting cells    | 7.61E-04 | 52  |
|         | Alfalfa |          |                                           |          |     |
| Jejunum | hay     | Negative | chronic myeloid leukemia                  | 7.62E-04 | 38  |
|         | Alfalfa |          |                                           |          |     |
| Jejunum | hay     | Negative | exocytosis of granules                    | 7.62E-04 | 13  |
|         | Alfalfa |          |                                           |          |     |
| Jejunum | hay     | Negative | internalization of lipid                  | 7.62E-04 | 13  |
| Jejunum | Alfalfa | Negative | necrosis of muscle                        | 7.90E-04 | 107 |

|         |         |          |                                            |          |     |
|---------|---------|----------|--------------------------------------------|----------|-----|
|         | hay     |          |                                            |          |     |
|         | Alfalfa |          |                                            |          |     |
| Jejunum | hay     | Negative | size of embryo                             | 7.90E-04 | 111 |
|         | Alfalfa |          |                                            |          |     |
| Jejunum | hay     | Negative | hypertrophy of cardiomyocytes              | 7.96E-04 | 46  |
|         | Alfalfa |          |                                            |          |     |
| Jejunum | hay     | Negative | transport of amino acids                   | 7.96E-04 | 46  |
|         | Alfalfa |          |                                            |          |     |
| Jejunum | hay     | Negative | cell movement of smooth muscle cells       | 8.09E-04 | 54  |
|         | Alfalfa |          |                                            |          |     |
| Jejunum | hay     | Negative | hydrolysis of carbohydrate                 | 8.19E-04 | 45  |
|         | Alfalfa |          |                                            |          |     |
| Jejunum | hay     | Negative | T cell development                         | 8.27E-04 | 153 |
|         | Alfalfa |          |                                            |          |     |
| Jejunum | hay     | Negative | neoplasia of cells                         | 8.36E-04 | 136 |
|         | Alfalfa |          |                                            |          |     |
| Jejunum | hay     | Negative | miniature excitatory postsynaptic currents | 8.36E-04 | 24  |
|         | Alfalfa |          |                                            |          |     |
| Jejunum | hay     | Negative | relaxation of muscle                       | 8.38E-04 | 31  |
|         | Alfalfa |          |                                            |          |     |
| Jejunum | hay     | Negative | shape change of neurites                   | 8.40E-04 | 90  |
|         | Alfalfa |          |                                            |          |     |
| Jejunum | hay     | Negative | transport of synaptic vesicles             | 8.53E-04 | 27  |
|         | Alfalfa |          |                                            |          |     |
| Jejunum | hay     | Negative | activation of enzyme                       | 8.55E-04 | 120 |
|         | Alfalfa |          |                                            |          |     |
| Jejunum | hay     | Negative | immediate hypersensitivity                 | 8.61E-04 | 100 |
|         | Alfalfa |          |                                            |          |     |
| Jejunum | hay     | Negative | synthesis of progesterone                  | 8.63E-04 | 32  |
|         | Alfalfa |          |                                            |          |     |
| Jejunum | hay     | Negative | Lymphocyte homeostasis                     | 8.63E-04 | 165 |
|         | Alfalfa |          |                                            |          |     |
| Jejunum | hay     | Negative | outgrowth of cells                         | 8.66E-04 | 133 |
|         | Alfalfa |          |                                            |          |     |
| Jejunum | hay     | Negative | keratosis                                  | 8.67E-04 | 42  |
|         | Alfalfa |          |                                            |          |     |
| Jejunum | hay     | Negative | abnormal morphology of skeleton            | 8.78E-04 | 86  |
|         | Alfalfa |          |                                            |          |     |
| Jejunum | hay     | Negative | phagocytosis of cells                      | 8.78E-04 | 86  |
|         | Alfalfa |          |                                            |          |     |
| Jejunum | hay     | Negative | differentiation of muscle cells            | 8.89E-04 | 89  |
|         | Alfalfa |          |                                            |          |     |
| Jejunum | hay     | Negative | binding of mononuclear leukocytes          | 8.94E-04 | 40  |
| Jejunum | Alfalfa | Negative | binding of lymphocytes                     | 8.95E-04 | 34  |

|         |         |          |                                      |          |     |
|---------|---------|----------|--------------------------------------|----------|-----|
|         | hay     |          |                                      |          |     |
|         | Alfalfa |          |                                      |          |     |
| Jejunum | hay     | Negative | uptake of fatty acid                 | 9.04E-04 | 28  |
|         | Alfalfa |          |                                      |          |     |
| Jejunum | hay     | Negative | mental retardation                   | 9.07E-04 | 75  |
|         | Alfalfa |          |                                      |          |     |
| Jejunum | hay     | Negative | metabolism of phospholipid           | 9.07E-04 | 75  |
|         | Alfalfa |          |                                      |          |     |
| Jejunum | hay     | Negative | response of mononuclear leukocytes   | 9.07E-04 | 75  |
|         | Alfalfa |          |                                      |          |     |
| Jejunum | hay     | Negative | cell death of tumor cells            | 9.14E-04 | 115 |
|         | Alfalfa |          |                                      |          |     |
| Jejunum | hay     | Negative | cellularity                          | 9.15E-04 | 25  |
|         | Alfalfa |          |                                      |          |     |
| Jejunum | hay     | Negative | apoptosis of heart cells             | 9.26E-04 | 62  |
|         | Alfalfa |          |                                      |          |     |
| Jejunum | hay     | Negative | tyrosine phosphorylation of protein  | 9.26E-04 | 62  |
|         | Alfalfa |          |                                      |          |     |
| Jejunum | hay     | Negative | function of muscle                   | 9.43E-04 | 108 |
|         | Alfalfa |          |                                      |          |     |
| Jejunum | hay     | Negative | transmigration of blood cells        | 9.78E-04 | 44  |
|         | Alfalfa |          |                                      |          |     |
| Jejunum | hay     | Negative | mobilization of Ca <sup>2+</sup>     | 1.02E-03 | 107 |
|         | Alfalfa |          |                                      |          |     |
| Jejunum | hay     | Negative | formation of filopodia               | 1.02E-03 | 55  |
|         | Alfalfa |          |                                      |          |     |
| Jejunum | hay     | Negative | cell death of cardiomyocytes         | 1.04E-03 | 69  |
|         | Alfalfa |          |                                      |          |     |
| Jejunum | hay     | Negative | morphology of skeleton               | 1.05E-03 | 88  |
|         | Alfalfa |          |                                      |          |     |
| Jejunum | hay     | Negative | metabolism of acylglycerol           | 1.05E-03 | 47  |
|         | Alfalfa |          |                                      |          |     |
| Jejunum | hay     | Negative | hydrolysis of phosphatidylinositol   | 1.09E-03 | 33  |
|         | Alfalfa |          |                                      |          |     |
| Jejunum | hay     | Negative | degranulation of cells               | 1.10E-03 | 72  |
|         | Alfalfa |          |                                      |          |     |
| Jejunum | hay     | Negative | contraction of heart                 | 1.10E-03 | 59  |
|         | Alfalfa |          |                                      |          |     |
| Jejunum | hay     | Negative | formation of connective tissue cells | 1.10E-03 | 68  |
|         | Alfalfa |          |                                      |          |     |
| Jejunum | hay     | Negative | quantity of lymphoid organ           | 1.11E-03 | 96  |
|         | Alfalfa |          |                                      |          |     |
| Jejunum | hay     | Negative | morphogenesis of neurites            | 1.11E-03 | 128 |
| Jejunum | Alfalfa | Negative | quantity of cellular protrusions     | 1.11E-03 | 53  |

|         |         |          |                                        |          |      |
|---------|---------|----------|----------------------------------------|----------|------|
|         | hay     |          |                                        |          |      |
|         | Alfalfa |          |                                        |          |      |
| Jejunum | hay     | Negative | synthesis of nitric oxide              | 1.12E-03 | 87   |
|         | Alfalfa |          |                                        |          |      |
| Jejunum | hay     | Negative | contraction of striated muscle         | 1.12E-03 | 45   |
|         | Alfalfa |          |                                        |          |      |
| Jejunum | hay     | Negative | cell viability of leukocytes           | 1.13E-03 | 82   |
|         | Alfalfa |          |                                        |          |      |
| Jejunum | hay     | Negative | cell death of muscle cells             | 1.13E-03 | 104  |
|         | Alfalfa |          |                                        |          |      |
| Jejunum | hay     | Negative | abnormal morphology of axial skeleton  | 1.14E-03 | 63   |
|         | Alfalfa |          |                                        |          |      |
| Jejunum | hay     | Negative | trafficking of cells                   | 1.15E-03 | 28   |
|         | Alfalfa |          |                                        |          |      |
| Jejunum | hay     | Negative | recruitment of cells                   | 1.18E-03 | 110  |
|         | Alfalfa |          |                                        |          |      |
| Jejunum | hay     | Negative | formation of osteoclasts               | 1.23E-03 | 42   |
|         | Alfalfa |          |                                        |          |      |
| Jejunum | hay     | Negative | differentiation of leukocytes          | 1.23E-03 | 200  |
|         | Alfalfa |          |                                        |          |      |
| Jejunum | hay     | Negative | MAPKKK cascade                         | 1.24E-03 | 66   |
|         | Alfalfa |          |                                        |          |      |
| Jejunum | hay     | Negative | differentiation of blood cells         | 1.24E-03 | 248  |
|         | Alfalfa |          |                                        |          |      |
| Jejunum | hay     | Negative | adhesion of tumor cell lines           | 1.24E-03 | 90   |
|         | Alfalfa |          |                                        |          |      |
| Jejunum | hay     | Negative | autosomal dominant disease             | 1.27E-03 | 190  |
|         | Alfalfa |          |                                        |          |      |
| Jejunum | hay     | Negative | glucose metabolism disorder            | 1.27E-03 | 369  |
|         | Alfalfa |          |                                        |          |      |
| Jejunum | hay     | Negative | release of granules                    | 1.28E-03 | 15   |
|         | Alfalfa |          |                                        |          |      |
| Jejunum | hay     | Negative | binding of cells                       | 1.28E-03 | 145  |
|         | Alfalfa |          |                                        |          |      |
| Jejunum | hay     | Negative | development of connective tissue cells | 1.30E-03 | 71   |
|         | Alfalfa |          |                                        |          |      |
| Jejunum | hay     | Negative | quantity of macrophages                | 1.30E-03 | 65   |
|         | Rice    |          |                                        |          |      |
| Jejunum | straw   | Positive | malignant solid tumor                  | 1.37E-32 | 3361 |
|         | Rice    |          |                                        |          |      |
| Jejunum | straw   | Positive | cancer                                 | 1.37E-32 | 3396 |
|         | Rice    |          |                                        |          |      |
| Jejunum | straw   | Positive | morbidity or mortality                 | 9.66E-30 | 920  |
| Jejunum | Rice    | Positive | organismal death                       | 2.85E-29 | 907  |

|         |       |          |                                |          |      |
|---------|-------|----------|--------------------------------|----------|------|
|         | straw |          |                                |          |      |
|         | Rice  |          |                                |          |      |
| Jejunum | straw | Positive | proliferation of cells         | 2.77E-27 | 1302 |
|         | Rice  |          |                                |          |      |
| Jejunum | straw | Positive | organization of cytoplasm      | 5.22E-21 | 592  |
|         | Rice  |          |                                |          |      |
| Jejunum | straw | Positive | tumorigenesis of tissue        | 6.79E-21 | 2828 |
|         | Rice  |          |                                |          |      |
| Jejunum | straw | Positive | epithelial cancer              | 6.79E-21 | 2762 |
|         | Rice  |          |                                |          |      |
| Jejunum | straw | Positive | neoplasia of epithelial tissue | 8.59E-21 | 2785 |
|         | Rice  |          |                                |          |      |
| Jejunum | straw | Positive | cell death                     | 7.99E-19 | 1146 |
|         | Rice  |          |                                |          |      |
| Jejunum | straw | Positive | morphology of cells            | 2.51E-18 | 712  |
|         | Rice  |          |                                |          |      |
| Jejunum | straw | Positive | abdominal neoplasm             | 9.61E-18 | 2746 |
|         | Rice  |          |                                |          |      |
| Jejunum | straw | Positive | necrosis                       | 4.26E-17 | 901  |
|         | Rice  |          |                                |          |      |
| Jejunum | straw | Positive | abdominal cancer               | 4.26E-17 | 2712 |
|         | Rice  |          |                                |          |      |
| Jejunum | straw | Positive | organization of cytoskeleton   | 1.64E-16 | 526  |
|         | Rice  |          |                                |          |      |
| Jejunum | straw | Positive | transport of molecule          | 1.09E-15 | 592  |
|         | Rice  |          |                                |          |      |
| Jejunum | straw | Positive | digestive system cancer        | 1.09E-15 | 2362 |
|         | Rice  |          |                                |          |      |
| Jejunum | straw | Positive | digestive organ tumor          | 7.92E-15 | 2376 |
|         | Rice  |          |                                |          |      |
| Jejunum | straw | Positive | vasculogenesis                 | 1.13E-14 | 298  |
|         | Rice  |          |                                |          |      |
| Jejunum | straw | Positive | cell movement                  | 1.14E-14 | 749  |
|         | Rice  |          |                                |          |      |
| Jejunum | straw | Positive | abnormal morphology of cells   | 1.71E-14 | 474  |
|         | Rice  |          |                                |          |      |
| Jejunum | straw | Positive | cellular homeostasis           | 5.84E-14 | 554  |
|         | Rice  |          |                                |          |      |
| Jejunum | straw | Positive | angiogenesis                   | 6.70E-14 | 353  |
|         | Rice  |          |                                |          |      |
| Jejunum | straw | Positive | expression of RNA              | 7.36E-14 | 750  |
|         | Rice  |          |                                |          |      |
| Jejunum | straw | Positive | transcription                  | 1.42E-13 | 701  |
| Jejunum | Rice  | Positive | apoptosis                      | 2.24E-13 | 899  |

|         |       |          |                                        |          |     |
|---------|-------|----------|----------------------------------------|----------|-----|
|         | straw |          |                                        |          |     |
|         | Rice  |          |                                        |          |     |
| Jejunum | straw | Positive | Movement Disorders                     | 4.21E-13 | 400 |
|         | Rice  |          |                                        |          |     |
| Jejunum | straw | Positive | microtubule dynamics                   | 5.54E-13 | 440 |
|         | Rice  |          |                                        |          |     |
| Jejunum | straw | Positive | transcription of RNA                   | 9.69E-13 | 653 |
|         | Rice  |          |                                        |          |     |
| Jejunum | straw | Positive | differentiation of cells               | 3.05E-12 | 772 |
|         | Rice  |          |                                        |          |     |
| Jejunum | straw | Positive | cell survival                          | 3.69E-12 | 503 |
|         | Rice  |          |                                        |          |     |
| Jejunum | straw | Positive | cell viability                         | 2.65E-11 | 469 |
|         | Rice  |          |                                        |          |     |
| Jejunum | straw | Positive | development of cytoplasm               | 3.02E-11 | 189 |
|         | Rice  |          |                                        |          |     |
| Jejunum | straw | Positive | morphology of cardiovascular system    | 3.14E-11 | 244 |
|         | Rice  |          |                                        |          |     |
| Jejunum | straw | Positive | disorder of basal ganglia              | 3.52E-11 | 294 |
|         | Rice  |          |                                        |          |     |
| Jejunum | straw | Positive | neurological signs                     | 5.06E-11 | 254 |
|         | Rice  |          |                                        |          |     |
| Jejunum | straw | Positive | migration of cells                     | 5.85E-11 | 656 |
|         | Rice  |          |                                        |          |     |
| Jejunum | straw | Positive | dyskinesia                             | 9.86E-11 | 241 |
|         | Rice  |          |                                        |          |     |
| Jejunum | straw | Positive | cell death of connective tissue cells  | 1.06E-10 | 236 |
|         | Rice  |          |                                        |          |     |
| Jejunum | straw | Positive | abnormal morphology of thoracic cavity | 1.35E-10 | 230 |
|         | Rice  |          |                                        |          |     |
| Jejunum | straw | Positive | formation of cellular protrusions      | 4.76E-10 | 334 |
|         | Rice  |          |                                        |          |     |
| Jejunum | straw | Positive | quantity of cells                      | 7.82E-10 | 607 |
|         | Rice  |          |                                        |          |     |
| Jejunum | straw | Positive | chorea                                 | 1.15E-09 | 223 |
|         | Rice  |          |                                        |          |     |
| Jejunum | straw | Positive | Huntington's Disease                   | 1.33E-09 | 222 |
|         | Rice  |          |                                        |          |     |
| Jejunum | straw | Positive | neuromuscular disease                  | 2.52E-09 | 324 |
|         | Rice  |          |                                        |          |     |
| Jejunum | straw | Positive | growth of organism                     | 3.31E-09 | 308 |
|         | Rice  |          |                                        |          |     |
| Jejunum | straw | Positive | size of body                           | 7.96E-09 | 311 |
| Jejunum | Rice  | Positive | proliferation of tumor cell lines      | 1.73E-08 | 530 |

|         |       |          |                                              |          |      |
|---------|-------|----------|----------------------------------------------|----------|------|
|         | straw |          |                                              |          |      |
|         | Rice  |          |                                              |          |      |
| Jejunum | straw | Positive | cell death of tumor cell lines               | 1.73E-08 | 523  |
|         | Rice  |          |                                              |          |      |
| Jejunum | straw | Positive | abnormal morphology of cardiovascular system | 1.77E-08 | 215  |
|         | Rice  |          |                                              |          |      |
| Jejunum | straw | Positive | concentration of lipid                       | 3.03E-08 | 295  |
|         | Rice  |          |                                              |          |      |
| Jejunum | straw | Positive | synthesis of lipid                           | 3.22E-08 | 263  |
|         | Rice  |          |                                              |          |      |
| Jejunum | straw | Positive | development of body trunk                    | 3.41E-08 | 393  |
|         | Rice  |          |                                              |          |      |
| Jejunum | straw | Positive | formation of cells                           | 4.18E-08 | 350  |
|         | Rice  |          |                                              |          |      |
| Jejunum | straw | Positive | peripheral arterial disease                  | 4.21E-08 | 90   |
|         | Rice  |          |                                              |          |      |
| Jejunum | straw | Positive | benign neoplasia                             | 5.07E-08 | 331  |
|         | Rice  |          |                                              |          |      |
| Jejunum | straw | Positive | protein kinase cascade                       | 5.58E-08 | 163  |
|         | Rice  |          |                                              |          |      |
| Jejunum | straw | Positive | Viral Infection                              | 5.77E-08 | 546  |
|         | Rice  |          |                                              |          |      |
| Jejunum | straw | Positive | transcription of DNA                         | 6.19E-08 | 522  |
|         | Rice  |          |                                              |          |      |
| Jejunum | straw | Positive | invasion of cells                            | 7.08E-08 | 312  |
|         | Rice  |          |                                              |          |      |
| Jejunum | straw | Positive | development of connective tissue             | 7.97E-08 | 145  |
|         | Rice  |          |                                              |          |      |
| Jejunum | straw | Positive | morphology of body cavity                    | 1.23E-07 | 414  |
|         | Rice  |          |                                              |          |      |
| Jejunum | straw | Positive | adenocarcinoma                               | 1.25E-07 | 2017 |
|         | Rice  |          |                                              |          |      |
| Jejunum | straw | Positive | formation of cytoskeleton                    | 1.26E-07 | 146  |
|         | Rice  |          |                                              |          |      |
| Jejunum | straw | Positive | perinatal death                              | 1.27E-07 | 220  |
|         | Rice  |          |                                              |          |      |
| Jejunum | straw | Positive | degeneration of nervous system               | 1.30E-07 | 115  |
|         | Rice  |          |                                              |          |      |
| Jejunum | straw | Positive | fibrogenesis                                 | 1.30E-07 | 158  |
|         | Rice  |          |                                              |          |      |
| Jejunum | straw | Positive | morphology of heart                          | 1.31E-07 | 156  |
|         | Rice  |          |                                              |          |      |
| Jejunum | straw | Positive | development of vasculature                   | 1.68E-07 | 160  |
| Jejunum | Rice  | Positive | congenital anomaly of musculoskeletal system | 1.88E-07 | 266  |

|         |       |          |                                                    |          |      |
|---------|-------|----------|----------------------------------------------------|----------|------|
|         | straw |          |                                                    |          |      |
|         | Rice  |          |                                                    |          |      |
| Jejunum | straw | Positive | organization of organelle                          | 2.77E-07 | 200  |
|         | Rice  |          |                                                    |          |      |
| Jejunum | straw | Positive | autosomal recessive disease                        | 3.02E-07 | 325  |
|         | Rice  |          |                                                    |          |      |
| Jejunum | straw | Positive | apoptosis of tumor cell lines                      | 3.37E-07 | 416  |
|         | Rice  |          |                                                    |          |      |
| Jejunum | straw | Positive | Organ Degeneration                                 | 3.60E-07 | 184  |
|         | Rice  |          |                                                    |          |      |
| Jejunum | straw | Positive | behavior                                           | 3.87E-07 | 346  |
|         | Rice  |          |                                                    |          |      |
| Jejunum | straw | Positive | formation of filaments                             | 5.09E-07 | 151  |
|         | Rice  |          |                                                    |          |      |
| Jejunum | straw | Positive | small GTPase mediated signal transduction          | 5.35E-07 | 77   |
|         | Rice  |          |                                                    |          |      |
| Jejunum | straw | Positive | abdominal adenocarcinoma                           | 5.62E-07 | 1834 |
|         | Rice  |          |                                                    |          |      |
| Jejunum | straw | Positive | ubiquitination                                     | 5.70E-07 | 130  |
|         | Rice  |          | metabolism of nucleic acid component or derivative |          |      |
| Jejunum | straw | Positive |                                                    | 7.97E-07 | 191  |
|         | Rice  |          |                                                    |          |      |
| Jejunum | straw | Positive | breast or colorectal cancer                        | 1.01E-06 | 1553 |
|         | Rice  |          |                                                    |          |      |
| Jejunum | straw | Positive | abnormal morphology of body cavity                 | 1.13E-06 | 391  |
|         | Rice  |          |                                                    |          |      |
| Jejunum | straw | Positive | sprouting                                          | 1.73E-06 | 145  |
|         | Rice  |          |                                                    |          |      |
| Jejunum | straw | Positive | cell transformation                                | 1.78E-06 | 170  |
|         | Rice  |          |                                                    |          |      |
| Jejunum | straw | Positive | cell movement of tumor cell lines                  | 1.79E-06 | 298  |
|         | Rice  |          |                                                    |          |      |
| Jejunum | straw | Positive | ubiquitination of protein                          | 2.39E-06 | 126  |
|         | Rice  |          |                                                    |          |      |
| Jejunum | straw | Positive | concentration of fatty acid                        | 2.71E-06 | 108  |
|         | Rice  |          |                                                    |          |      |
| Jejunum | straw | Positive | neuronal cell death                                | 2.72E-06 | 242  |
|         | Rice  |          |                                                    |          |      |
| Jejunum | straw | Positive | abnormal morphology of embryonic tissue            | 2.90E-06 | 198  |
|         | Rice  |          |                                                    |          |      |
| Jejunum | straw | Positive | abnormal morphology of heart                       | 3.00E-06 | 143  |
|         | Rice  |          |                                                    |          |      |
| Jejunum | straw | Positive | gastrointestinal tract cancer                      | 3.10E-06 | 1574 |
| Jejunum | Rice  | Positive | morphology of head                                 | 3.53E-06 | 304  |



|         |       |          |                                          |          |      |
|---------|-------|----------|------------------------------------------|----------|------|
|         | straw |          |                                          |          |      |
|         | Rice  |          |                                          |          |      |
| Jejunum | straw | Positive | invasion of tumor cell lines             | 3.63E-06 | 236  |
|         | Rice  |          |                                          |          |      |
| Jejunum | straw | Positive | apoptosis of connective tissue cells     | 3.71E-06 | 113  |
|         | Rice  |          |                                          |          |      |
| Jejunum | straw | Positive | gastrointestinal carcinoma               | 3.73E-06 | 1416 |
|         | Rice  |          |                                          |          |      |
| Jejunum | straw | Positive | growth of connective tissue              | 3.75E-06 | 229  |
|         | Rice  |          |                                          |          |      |
| Jejunum | straw | Positive | metabolism of nucleoside triphosphate    | 4.22E-06 | 59   |
|         | Rice  |          |                                          |          |      |
| Jejunum | straw | Positive | migration of tumor cell lines            | 4.22E-06 | 249  |
|         | Rice  |          |                                          |          |      |
| Jejunum | straw | Positive | infection by Retroviridae                | 4.34E-06 | 253  |
|         | Rice  |          |                                          |          |      |
| Jejunum | straw | Positive | metabolism of carbohydrate               | 4.40E-06 | 221  |
|         | Rice  |          |                                          |          |      |
| Jejunum | straw | Positive | phosphorylation of protein               | 4.66E-06 | 258  |
|         | Rice  |          |                                          |          |      |
| Jejunum | straw | Positive | cell cycle progression                   | 4.66E-06 | 357  |
|         | Rice  |          |                                          |          |      |
| Jejunum | straw | Positive | growth of epithelial tissue              | 4.72E-06 | 240  |
|         | Rice  |          |                                          |          |      |
| Jejunum | straw | Positive | cell movement of endothelial cells       | 4.84E-06 | 132  |
|         | Rice  |          |                                          |          |      |
| Jejunum | straw | Positive | abnormal morphology of head              | 4.98E-06 | 289  |
|         | Rice  |          |                                          |          |      |
| Jejunum | straw | Positive | quantity of leukocytes                   | 5.99E-06 | 315  |
|         | Rice  |          |                                          |          |      |
| Jejunum | straw | Positive | proliferation of connective tissue cells | 5.99E-06 | 211  |
|         | Rice  |          |                                          |          |      |
| Jejunum | straw | Positive | proliferation of fibroblast cell lines   | 5.99E-06 | 155  |
|         | Rice  |          |                                          |          |      |
| Jejunum | straw | Positive | apoptosis of fibroblast cell lines       | 5.99E-06 | 123  |
|         | Rice  |          |                                          |          |      |
| Jejunum | straw | Positive | Gastrointestinal Tract Cancer and Tumors | 6.33E-06 | 1594 |
|         | Rice  |          |                                          |          |      |
| Jejunum | straw | Positive | formation of leukocytes                  | 7.23E-06 | 65   |
|         | Rice  |          |                                          |          |      |
| Jejunum | straw | Positive | interphase                               | 7.70E-06 | 231  |
|         | Rice  |          |                                          |          |      |
| Jejunum | straw | Positive | HIV infection                            | 8.17E-06 | 249  |
| Jejunum | Rice  | Positive | metabolism of protein                    | 8.55E-06 | 332  |

|         |       |          |                                          |          |      |
|---------|-------|----------|------------------------------------------|----------|------|
|         | straw |          |                                          |          |      |
|         | Rice  |          |                                          |          |      |
| Jejunum | straw | Positive | growth of embryo                         | 8.61E-06 | 172  |
|         | Rice  |          |                                          |          |      |
| Jejunum | straw | Positive | cell viability of tumor cell lines       | 9.37E-06 | 270  |
|         | Rice  |          |                                          |          |      |
| Jejunum | straw | Positive | metabolism of nucleotide                 | 9.70E-06 | 159  |
|         | Rice  |          |                                          |          |      |
| Jejunum | straw | Positive | branching of cells                       | 9.74E-06 | 136  |
|         | Rice  |          |                                          |          |      |
| Jejunum | straw | Positive | colon tumor                              | 1.05E-05 | 1169 |
|         | Rice  |          |                                          |          |      |
| Jejunum | straw | Positive | cell death of fibroblast cell lines      | 1.06E-05 | 155  |
|         | Rice  |          |                                          |          |      |
| Jejunum | straw | Positive | cellular degradation                     | 1.07E-05 | 97   |
|         | Rice  |          |                                          |          |      |
| Jejunum | straw | Positive | tumorigenesis of intestine               | 1.07E-05 | 1168 |
|         | Rice  |          |                                          |          |      |
| Jejunum | straw | Positive | colon cancer                             | 1.10E-05 | 1162 |
|         | Rice  |          |                                          |          |      |
| Jejunum | straw | Positive | abnormal morphology of epithelial tissue | 1.11E-05 | 152  |
|         | Rice  |          |                                          |          |      |
| Jejunum | straw | Positive | neoplasia of colon                       | 1.14E-05 | 1165 |
|         | Rice  |          |                                          |          |      |
| Jejunum | straw | Positive | function of leukocytes                   | 1.20E-05 | 191  |
|         | Rice  |          |                                          |          |      |
| Jejunum | straw | Positive | function of blood cells                  | 1.28E-05 | 207  |
|         | Rice  |          |                                          |          |      |
| Jejunum | straw | Positive | abdominal carcinoma                      | 1.29E-05 | 1842 |
|         | Rice  |          |                                          |          |      |
| Jejunum | straw | Positive | apoptosis of blood cells                 | 1.35E-05 | 177  |
|         | Rice  |          |                                          |          |      |
| Jejunum | straw | Positive | death of perinatal stage organism        | 1.38E-05 | 37   |
|         | Rice  |          |                                          |          |      |
| Jejunum | straw | Positive | Neurodegeneration                        | 1.39E-05 | 115  |
|         | Rice  |          |                                          |          |      |
| Jejunum | straw | Positive | biosynthesis of nucleoside triphosphate  | 1.47E-05 | 46   |
|         | Rice  |          |                                          |          |      |
| Jejunum | straw | Positive | metabolism of membrane lipid derivative  | 1.57E-05 | 141  |
|         | Rice  |          |                                          |          |      |
| Jejunum | straw | Positive | cognition                                | 1.62E-05 | 163  |
|         | Rice  |          |                                          |          |      |
| Jejunum | straw | Positive | I-kappaB kinase/NF-kappaB cascade        | 1.66E-05 | 69   |
| Jejunum | Rice  | Positive | synthesis of carbohydrate                | 1.90E-05 | 153  |

|         |       |          |                                         |          |      |
|---------|-------|----------|-----------------------------------------|----------|------|
|         | straw |          |                                         |          |      |
|         | Rice  |          |                                         |          |      |
| Jejunum | straw | Positive | transactivation                         | 2.13E-05 | 203  |
|         | Rice  |          |                                         |          |      |
| Jejunum | straw | Positive | morphology of nervous system            | 2.26E-05 | 269  |
|         | Rice  |          |                                         |          |      |
| Jejunum | straw | Positive | cell movement of muscle cells           | 2.26E-05 | 71   |
|         | Rice  |          |                                         |          |      |
| Jejunum | straw | Positive | colorectal carcinoma                    | 2.28E-05 | 1159 |
|         | Rice  |          |                                         |          |      |
| Jejunum | straw | Positive | learning                                | 2.58E-05 | 150  |
|         | Rice  |          |                                         |          |      |
| Jejunum | straw | Positive | growth of lesion                        | 2.63E-05 | 273  |
|         | Rice  |          |                                         |          |      |
| Jejunum | straw | Positive | cell death of fibroblasts               | 2.66E-05 | 99   |
|         | Rice  |          |                                         |          |      |
| Jejunum | straw | Positive | movement of vascular endothelial cells  | 2.72E-05 | 71   |
|         | Rice  |          |                                         |          |      |
| Jejunum | straw | Positive | cell movement of smooth muscle cells    | 2.85E-05 | 64   |
|         | Rice  |          |                                         |          |      |
| Jejunum | straw | Positive | morphogenesis of neurons                | 3.03E-05 | 152  |
|         | Rice  |          |                                         |          |      |
| Jejunum | straw | Positive | branching of neurites                   | 3.04E-05 | 103  |
|         | Rice  |          |                                         |          |      |
| Jejunum | straw | Positive | growth of tumor                         | 3.14E-05 | 272  |
|         | Rice  |          |                                         |          |      |
| Jejunum | straw | Positive | melanoma                                | 3.24E-05 | 2026 |
|         | Rice  |          |                                         |          |      |
| Jejunum | straw | Positive | accumulation of lipid                   | 3.30E-05 | 110  |
|         | Rice  |          |                                         |          |      |
| Jejunum | straw | Positive | benign neoplasm of female genital organ | 3.33E-05 | 152  |
|         | Rice  |          |                                         |          |      |
| Jejunum | straw | Positive | fatty acid metabolism                   | 3.49E-05 | 209  |
|         | Rice  |          |                                         |          |      |
| Jejunum | straw | Positive | infection by RNA virus                  | 3.49E-05 | 294  |
|         | Rice  |          |                                         |          |      |
| Jejunum | straw | Positive | migration of muscle cells               | 3.57E-05 | 65   |
|         | Rice  |          |                                         |          |      |
| Jejunum | straw | Positive | morphology of muscle                    | 3.57E-05 | 122  |
|         | Rice  |          |                                         |          |      |
| Jejunum | straw | Positive | female genital neoplasm                 | 3.57E-05 | 1112 |
|         | Rice  |          |                                         |          |      |
| Jejunum | straw | Positive | quantity of blood cells                 | 3.62E-05 | 344  |
| Jejunum | Rice  | Positive | neonatal death                          | 4.05E-05 | 156  |

|         |       |          |                                                |          |      |
|---------|-------|----------|------------------------------------------------|----------|------|
|         | straw |          |                                                |          |      |
|         | Rice  |          |                                                |          |      |
| Jejunum | straw | Positive | intestinal tumor                               | 4.05E-05 | 1351 |
|         | Rice  |          |                                                |          |      |
| Jejunum | straw | Positive | colorectal neoplasia                           | 4.05E-05 | 1347 |
|         | Rice  |          |                                                |          |      |
| Jejunum | straw | Positive | formation of muscle                            | 4.19E-05 | 142  |
|         | Rice  |          |                                                |          |      |
| Jejunum | straw | Positive | cell death of embryonic cells                  | 4.19E-05 | 48   |
|         | Rice  |          |                                                |          |      |
| Jejunum | straw | Positive | migration of smooth muscle cells               | 4.60E-05 | 59   |
|         | Rice  |          |                                                |          |      |
| Jejunum | straw | Positive | development of epithelial tissue               | 4.60E-05 | 181  |
|         | Rice  |          |                                                |          |      |
| Jejunum | straw | Positive | development of head                            | 4.61E-05 | 329  |
|         | Rice  |          |                                                |          |      |
| Jejunum | straw | Positive | morphology of vessel                           | 4.62E-05 | 112  |
|         | Rice  |          |                                                |          |      |
| Jejunum | straw | Positive | outgrowth of plasma membrane projections       | 4.79E-05 | 145  |
|         | Rice  |          |                                                |          |      |
| Jejunum | straw | Positive | colorectal cancer                              | 5.11E-05 | 1328 |
|         | Rice  |          |                                                |          |      |
| Jejunum | straw | Positive | metabolism of DNA                              | 5.18E-05 | 142  |
|         | Rice  |          |                                                |          |      |
| Jejunum | straw | Positive | peripheral vascular disease                    | 5.37E-05 | 136  |
|         | Rice  |          | intermediate disease stage peripheral arterial |          |      |
| Jejunum | straw | Positive | disease                                        | 5.40E-05 | 62   |
|         | Rice  |          |                                                |          |      |
| Jejunum | straw | Positive | neuritogenesis                                 | 5.55E-05 | 202  |
|         | Rice  |          |                                                |          |      |
| Jejunum | straw | Positive | transmembrane potential of mitochondria        | 5.63E-05 | 81   |
|         | Rice  |          |                                                |          |      |
| Jejunum | straw | Positive | gastrointestinal adenocarcinoma                | 6.01E-05 | 1322 |
|         | Rice  |          |                                                |          |      |
| Jejunum | straw | Positive | degeneration of neurons                        | 6.01E-05 | 89   |
|         | Rice  |          |                                                |          |      |
| Jejunum | straw | Positive | synthesis of nucleotide                        | 6.08E-05 | 130  |
|         | Rice  |          |                                                |          |      |
| Jejunum | straw | Positive | intestinal cancer                              | 6.13E-05 | 1329 |
|         | Rice  |          |                                                |          |      |
| Jejunum | straw | Positive | cell death of blood cells                      | 6.38E-05 | 237  |
|         | Rice  |          |                                                |          |      |
| Jejunum | straw | Positive | abnormal morphology of nervous system          | 6.45E-05 | 247  |
| Jejunum | Rice  | Positive | development of cardiovascular tissue           | 6.45E-05 | 132  |

|         |       |          |                                           |          |      |
|---------|-------|----------|-------------------------------------------|----------|------|
|         | straw |          |                                           |          |      |
|         | Rice  |          |                                           |          |      |
| Jejunum | straw | Positive | synthesis of fatty acid                   | 6.51E-05 | 113  |
|         | Rice  |          |                                           |          |      |
| Jejunum | straw | Positive | genital tumor                             | 6.76E-05 | 1253 |
|         | Rice  |          |                                           |          |      |
| Jejunum | straw | Positive | female genital tract serous cancer        | 7.16E-05 | 137  |
|         | Rice  |          |                                           |          |      |
| Jejunum | straw | Positive | cartilage development                     | 7.22E-05 | 57   |
|         | Rice  |          |                                           |          |      |
| Jejunum | straw | Positive | attachment of cells                       | 7.22E-05 | 54   |
|         | Rice  |          |                                           |          |      |
| Jejunum | straw | Positive | abnormal morphology of respiratory system | 7.61E-05 | 111  |
|         | Rice  |          |                                           |          |      |
| Jejunum | straw | Positive | morphology of heart ventricle             | 7.87E-05 | 73   |
|         | Rice  |          |                                           |          |      |
| Jejunum | straw | Positive | long-term potentiation                    | 7.92E-05 | 90   |
|         | Rice  |          |                                           |          |      |
| Jejunum | straw | Positive | cell viability of connective tissue cells | 8.31E-05 | 53   |
|         | Rice  |          |                                           |          |      |
| Jejunum | straw | Positive | branching of neurons                      | 8.31E-05 | 104  |
|         | Rice  |          |                                           |          |      |
| Jejunum | straw | Positive | degeneration of cells                     | 8.77E-05 | 123  |
|         | Rice  |          |                                           |          |      |
| Jejunum | straw | Positive | survival of organism                      | 9.33E-05 | 239  |
|         | Rice  |          |                                           |          |      |
| Jejunum | straw | Positive | morphology of respiratory system          | 9.62E-05 | 112  |
|         | Rice  |          |                                           |          |      |
| Jejunum | straw | Positive | cell death of stem cells                  | 9.62E-05 | 36   |
|         | Rice  |          |                                           |          |      |
| Jejunum | straw | Positive | Bleeding                                  | 9.67E-05 | 149  |
|         | Rice  |          |                                           |          |      |
| Jejunum | straw | Positive | infection by HIV-1                        | 9.84E-05 | 209  |
|         | Rice  |          |                                           |          |      |
| Jejunum | straw | Positive | function of cardiovascular system         | 1.02E-04 | 131  |
|         | Rice  |          |                                           |          |      |
| Jejunum | straw | Positive | morphogenesis of neurites                 | 1.02E-04 | 147  |
|         | Rice  |          |                                           |          |      |
| Jejunum | straw | Positive | development of body axis                  | 1.04E-04 | 348  |
|         | Rice  |          |                                           |          |      |
| Jejunum | straw | Positive | necrosis of epithelial tissue             | 1.06E-04 | 202  |
|         | Rice  |          |                                           |          |      |
| Jejunum | straw | Positive | homing of cells                           | 1.07E-04 | 192  |
| Jejunum | Rice  | Positive | biosynthesis of purine ribonucleotide     | 1.10E-04 | 42   |

|         |       |          |                                            |          |      |
|---------|-------|----------|--------------------------------------------|----------|------|
|         | straw |          |                                            |          |      |
|         | Rice  |          |                                            |          |      |
| Jejunum | straw | Positive | Growth Failure                             | 1.12E-04 | 205  |
|         | Rice  |          |                                            |          |      |
| Jejunum | straw | Positive | cell movement of neutrophils               | 1.16E-04 | 107  |
|         | Rice  |          |                                            |          |      |
| Jejunum | straw | Positive | outgrowth of neurites                      | 1.16E-04 | 142  |
|         | Rice  |          |                                            |          |      |
| Jejunum | straw | Positive | abnormal morphology of reproductive system | 1.17E-04 | 176  |
|         | Rice  |          |                                            |          |      |
| Jejunum | straw | Positive | migration of granulocytes                  | 1.23E-04 | 56   |
|         | Rice  |          |                                            |          |      |
| Jejunum | straw | Positive | morphology of blood vessel                 | 1.23E-04 | 102  |
|         | Rice  |          |                                            |          |      |
| Jejunum | straw | Positive | formation of thymocytes                    | 1.23E-04 | 43   |
|         | Rice  |          |                                            |          |      |
| Jejunum | straw | Positive | formation of plasma membrane projections   | 1.25E-04 | 204  |
|         | Rice  |          |                                            |          |      |
| Jejunum | straw | Positive | cell spreading                             | 1.25E-04 | 100  |
|         | Rice  |          |                                            |          |      |
| Jejunum | straw | Positive | formation of blood cells                   | 1.27E-04 | 74   |
|         | Rice  |          |                                            |          |      |
| Jejunum | straw | Positive | colorectal adenocarcinoma                  | 1.31E-04 | 1117 |
|         | Rice  |          |                                            |          |      |
| Jejunum | straw | Positive | morphology of connective tissue            | 1.34E-04 | 160  |
|         | Rice  |          |                                            |          |      |
| Jejunum | straw | Positive | accumulation of steroid                    | 1.38E-04 | 35   |
|         | Rice  |          |                                            |          |      |
| Jejunum | straw | Positive | formation of actin filaments               | 1.40E-04 | 109  |
|         | Rice  |          |                                            |          |      |
| Jejunum | straw | Positive | colony formation of cells                  | 1.40E-04 | 170  |
|         | Rice  |          |                                            |          |      |
| Jejunum | straw | Positive | transport of protein                       | 1.42E-04 | 108  |
|         | Rice  |          |                                            |          |      |
| Jejunum | straw | Positive | differentiation of connective tissue       | 1.44E-04 | 246  |
|         | Rice  |          |                                            |          |      |
| Jejunum | straw | Positive | activation of DNA endogenous promoter      | 1.44E-04 | 395  |
|         | Rice  |          |                                            |          |      |
| Jejunum | straw | Positive | proliferation of endothelial cells         | 1.52E-04 | 111  |
|         | Rice  |          |                                            |          |      |
| Jejunum | straw | Positive | peroxisomal disorder                       | 1.57E-04 | 16   |
|         | Rice  |          |                                            |          |      |
| Jejunum | straw | Positive | homing                                     | 1.63E-04 | 196  |
| Jejunum | Rice  | Positive | formation of filopodia                     | 1.63E-04 | 63   |

|         |       |          |                                            |          |     |
|---------|-------|----------|--------------------------------------------|----------|-----|
|         | straw |          |                                            |          |     |
|         | Rice  |          |                                            |          |     |
| Jejunum | straw | Positive | differentiation of connective tissue cells | 1.64E-04 | 218 |
|         | Rice  |          |                                            |          |     |
| Jejunum | straw | Positive | development of blood cells                 | 1.71E-04 | 221 |
|         | Rice  |          |                                            |          |     |
| Jejunum | straw | Positive | polyneuropathy                             | 1.71E-04 | 44  |
|         | Rice  |          |                                            |          |     |
| Jejunum | straw | Positive | development of neurons                     | 1.71E-04 | 262 |
|         | Rice  |          |                                            |          |     |
| Jejunum | straw | Positive | memory                                     | 1.71E-04 | 93  |
|         | Rice  |          |                                            |          |     |
| Jejunum | straw | Positive | concentration of Ca <sup>2+</sup>          | 1.85E-04 | 50  |
|         | Rice  |          |                                            |          |     |
| Jejunum | straw | Positive | growth of plasma membrane projections      | 1.86E-04 | 161 |
|         | Rice  |          |                                            |          |     |
| Jejunum | straw | Positive | apoptosis of leukocytes                    | 1.86E-04 | 158 |
|         | Rice  |          |                                            |          |     |
| Jejunum | straw | Positive | migration of endothelial cells             | 1.93E-04 | 116 |
|         | Rice  |          |                                            |          |     |
| Jejunum | straw | Positive | immune response of cells                   | 1.97E-04 | 195 |
|         | Rice  |          |                                            |          |     |
| Jejunum | straw | Positive | morphology of reproductive system          | 1.97E-04 | 183 |
|         | Rice  |          |                                            |          |     |
| Jejunum | straw | Positive | serous ovarian carcinoma                   | 1.99E-04 | 74  |
|         | Rice  |          |                                            |          |     |
| Jejunum | straw | Positive | development of hematopoietic system        | 1.99E-04 | 90  |
|         | Rice  |          |                                            |          |     |
| Jejunum | straw | Positive | benign ovarian tumor                       | 2.00E-04 | 75  |
|         | Rice  |          |                                            |          |     |
| Jejunum | straw | Positive | proliferation of neuronal cells            | 2.03E-04 | 196 |
|         | Rice  |          |                                            |          |     |
| Jejunum | straw | Positive | autophagy                                  | 2.03E-04 | 131 |
|         | Rice  |          |                                            |          |     |
| Jejunum | straw | Positive | formation of T lymphocytes                 | 2.03E-04 | 46  |
|         | Rice  |          |                                            |          |     |
| Jejunum | straw | Positive | development of leukocytes                  | 2.06E-04 | 200 |
|         | Rice  |          |                                            |          |     |
| Jejunum | straw | Positive | morphology of genital organ                | 2.11E-04 | 147 |
|         | Rice  |          |                                            |          |     |
| Jejunum | straw | Positive | fibrosis of heart                          | 2.11E-04 | 68  |
|         | Rice  |          |                                            |          |     |
| Jejunum | straw | Positive | cell death of central nervous system cells | 2.11E-04 | 104 |
| Jejunum | Rice  | Positive | apoptosis of muscle                        | 2.15E-04 | 94  |

|         |       |          |                                               |          |     |
|---------|-------|----------|-----------------------------------------------|----------|-----|
|         | straw |          |                                               |          |     |
|         | Rice  |          |                                               |          |     |
| Jejunum | straw | Positive | endothelial cell development                  | 2.15E-04 | 124 |
|         | Rice  |          |                                               |          |     |
| Jejunum | straw | Positive | quantity of lymphoid organ                    | 2.15E-04 | 109 |
|         | Rice  |          |                                               |          |     |
| Jejunum | straw | Positive | development of endothelial tissue             | 2.15E-04 | 128 |
|         | Rice  |          |                                               |          |     |
| Jejunum | straw | Positive | cell movement of vascular smooth muscle cells | 2.30E-04 | 45  |
|         | Rice  |          |                                               |          |     |
| Jejunum | straw | Positive | cell movement of blood cells                  | 2.33E-04 | 290 |
|         | Rice  |          |                                               |          |     |
| Jejunum | straw | Positive | T cell development                            | 2.33E-04 | 172 |
|         | Rice  |          |                                               |          |     |
| Jejunum | straw | Positive | multiple congenital anomalies                 | 2.36E-04 | 146 |
|         | Rice  |          |                                               |          |     |
| Jejunum | straw | Positive | breast or ovarian cancer                      | 2.37E-04 | 607 |
|         | Rice  |          |                                               |          |     |
| Jejunum | straw | Positive | Ras protein signal transduction               | 2.40E-04 | 28  |
|         | Rice  |          |                                               |          |     |
| Jejunum | straw | Positive | adenoma                                       | 2.40E-04 | 188 |
|         | Rice  |          |                                               |          |     |
| Jejunum | straw | Positive | expression of protein                         | 2.40E-04 | 119 |
|         | Rice  |          |                                               |          |     |
| Jejunum | straw | Positive | cell movement of fibroblasts                  | 2.43E-04 | 68  |
|         | Rice  |          |                                               |          |     |
| Jejunum | straw | Positive | cell death of immune cells                    | 2.45E-04 | 222 |
|         | Rice  |          |                                               |          |     |
| Jejunum | straw | Positive | hereditary neuropathy                         | 2.52E-04 | 62  |
|         | Rice  |          |                                               |          |     |
| Jejunum | straw | Positive | cell movement of granulocytes                 | 2.54E-04 | 129 |
|         | Rice  |          |                                               |          |     |
| Jejunum | straw | Positive | potentiation of synapse                       | 2.54E-04 | 57  |
|         | Rice  |          |                                               |          |     |
| Jejunum | straw | Positive | congenital malformation of skeleton           | 2.55E-04 | 146 |
|         | Rice  |          |                                               |          |     |
| Jejunum | straw | Positive | proliferation of cervical cancer cell lines   | 2.57E-04 | 74  |
|         | Rice  |          |                                               |          |     |
| Jejunum | straw | Positive | cell death of heart cells                     | 2.61E-04 | 80  |
|         | Rice  |          |                                               |          |     |
| Jejunum | straw | Positive | apoptosis of muscle cells                     | 2.73E-04 | 93  |
|         | Rice  |          |                                               |          |     |
| Jejunum | straw | Positive | migration of connective tissue cells          | 2.79E-04 | 67  |
| Jejunum | Rice  | Positive | formation of vascular lesion                  | 2.80E-04 | 45  |



|         |       |          |                                            |          |     |
|---------|-------|----------|--------------------------------------------|----------|-----|
|         | straw |          |                                            |          |     |
|         | Rice  |          |                                            |          |     |
| Jejunum | straw | Positive | infection of cells                         | 2.83E-04 | 265 |
|         | Rice  |          |                                            |          |     |
| Jejunum | straw | Positive | secretion of molecule                      | 2.88E-04 | 187 |
|         | Rice  |          |                                            |          |     |
| Jejunum | straw | Positive | ruffling                                   | 2.92E-04 | 43  |
|         | Rice  |          |                                            |          |     |
| Jejunum | straw | Positive | concentration of phosphatidic acid         | 2.92E-04 | 52  |
|         | Rice  |          |                                            |          |     |
| Jejunum | straw | Positive | development of genitourinary system        | 2.92E-04 | 293 |
|         | Rice  |          |                                            |          |     |
| Jejunum | straw | Positive | abnormal morphology of genital organ       | 2.92E-04 | 141 |
|         | Rice  |          |                                            |          |     |
| Jejunum | straw | Positive | migration of myeloid cells                 | 2.93E-04 | 62  |
|         | Rice  |          |                                            |          |     |
| Jejunum | straw | Positive | advanced stage peripheral arterial disease | 3.00E-04 | 57  |
|         | Rice  |          |                                            |          |     |
| Jejunum | straw | Positive | cell viability of kidney cell lines        | 3.09E-04 | 32  |
|         | Rice  |          |                                            |          |     |
| Jejunum | straw | Positive | shape change of tumor cell lines           | 3.10E-04 | 58  |
|         | Rice  |          |                                            |          |     |
| Jejunum | straw | Positive | colony formation                           | 3.12E-04 | 182 |
|         | Rice  |          |                                            |          |     |
| Jejunum | straw | Positive | recruitment of cells                       | 3.15E-04 | 124 |
|         | Rice  |          |                                            |          |     |
| Jejunum | straw | Positive | chemotaxis of cells                        | 3.18E-04 | 179 |
|         | Rice  |          |                                            |          |     |
| Jejunum | straw | Positive | morphology of gonad                        | 3.18E-04 | 131 |
|         | Rice  |          |                                            |          |     |
| Jejunum | straw | Positive | Emery-Dreifuss muscular dystrophy          | 3.22E-04 | 28  |
|         | Rice  |          |                                            |          |     |
| Jejunum | straw | Positive | spatial learning                           | 3.22E-04 | 68  |
|         | Rice  |          |                                            |          |     |
| Jejunum | straw | Positive | growth of neurites                         | 3.22E-04 | 158 |
|         | Rice  |          |                                            |          |     |
| Jejunum | straw | Positive | migration of blood cells                   | 3.24E-04 | 288 |
|         | Rice  |          |                                            |          |     |
| Jejunum | straw | Positive | cell death of heart                        | 3.33E-04 | 82  |
|         | Rice  |          |                                            |          |     |
| Jejunum | straw | Positive | hereditary polyneuropathy                  | 3.34E-04 | 40  |
|         | Rice  |          |                                            |          |     |
| Jejunum | straw | Positive | transactivation of RNA                     | 3.36E-04 | 184 |
| Jejunum | Rice  | Positive | replication of RNA virus                   | 3.36E-04 | 172 |

|         |       |          |                                           |          |     |
|---------|-------|----------|-------------------------------------------|----------|-----|
|         | straw |          |                                           |          |     |
|         | Rice  |          |                                           |          |     |
| Jejunum | straw | Positive | long-term potentiation of synapse         | 3.38E-04 | 56  |
|         | Rice  |          |                                           |          |     |
| Jejunum | straw | Positive | cell death of epithelial cells            | 3.40E-04 | 169 |
|         | Rice  |          |                                           |          |     |
| Jejunum | straw | Positive | proliferation of blood cells              | 3.66E-04 | 278 |
|         | Rice  |          |                                           |          |     |
| Jejunum | straw | Positive | morphology of central nervous system      | 3.72E-04 | 174 |
|         | Rice  |          |                                           |          |     |
| Jejunum | straw | Positive | formation of mononuclear leukocytes       | 3.79E-04 | 50  |
|         | Rice  |          |                                           |          |     |
| Jejunum | straw | Positive | leukocyte migration                       | 3.79E-04 | 287 |
|         | Rice  |          |                                           |          |     |
| Jejunum | straw | Positive | development of connective tissue cells    | 3.83E-04 | 80  |
|         | Rice  |          |                                           |          |     |
| Jejunum | straw | Positive | development of reproductive system        | 3.83E-04 | 245 |
|         | Rice  |          |                                           |          |     |
| Jejunum | straw | Positive | chemotaxis                                | 3.93E-04 | 184 |
|         | Rice  |          |                                           |          |     |
| Jejunum | straw | Positive | cell viability of embryonic cell lines    | 4.02E-04 | 29  |
|         | Rice  |          |                                           |          |     |
| Jejunum | straw | Positive | female genital tract adenocarcinoma       | 4.04E-04 | 895 |
|         | Rice  |          |                                           |          |     |
| Jejunum | straw | Positive | uptake of carbohydrate                    | 4.16E-04 | 102 |
|         | Rice  |          |                                           |          |     |
| Jejunum | straw | Positive | function of phagocytes                    | 4.19E-04 | 107 |
|         | Rice  |          |                                           |          |     |
| Jejunum | straw | Positive | concentration of phospholipid             | 4.31E-04 | 67  |
|         | Rice  |          |                                           |          |     |
| Jejunum | straw | Positive | cell death of cerebral cortex cells       | 4.33E-04 | 82  |
|         | Rice  |          |                                           |          |     |
| Jejunum | straw | Positive | outgrowth of cells                        | 4.40E-04 | 148 |
|         | Rice  |          |                                           |          |     |
| Jejunum | straw | Positive | proliferation of fibroblasts              | 4.41E-04 | 122 |
|         | Rice  |          |                                           |          |     |
| Jejunum | straw | Positive | cell death of cardiomyocytes              | 4.41E-04 | 77  |
|         | Rice  |          |                                           |          |     |
| Jejunum | straw | Positive | proliferation of hepatoma cell lines      | 4.41E-04 | 72  |
|         | Rice  |          |                                           |          |     |
| Jejunum | straw | Positive | transmembrane potential                   | 4.44E-04 | 98  |
|         | Rice  |          |                                           |          |     |
| Jejunum | straw | Positive | chronic psoriasis                         | 4.46E-04 | 54  |
| Jejunum | Rice  | Positive | migration of vascular smooth muscle cells | 4.58E-04 | 41  |

|         |       |          |                                        |          |     |
|---------|-------|----------|----------------------------------------|----------|-----|
|         | straw |          |                                        |          |     |
|         | Rice  |          |                                        |          |     |
| Jejunum | straw | Positive | cell death of brain                    | 4.61E-04 | 102 |
|         | Rice  |          |                                        |          |     |
| Jejunum | straw | Positive | size of embryo                         | 4.73E-04 | 123 |
|         | Rice  |          |                                        |          |     |
| Jejunum | straw | Positive | cell death of mononuclear leukocytes   | 4.76E-04 | 136 |
|         | Rice  |          |                                        |          |     |
| Jejunum | straw | Positive | apoptosis of epithelial cells          | 4.76E-04 | 100 |
|         | Rice  |          |                                        |          |     |
| Jejunum | straw | Positive | proliferation of smooth muscle cells   | 4.76E-04 | 100 |
|         | Rice  |          |                                        |          |     |
| Jejunum | straw | Positive | cell death of cortical neurons         | 4.76E-04 | 64  |
|         | Rice  |          |                                        |          |     |
| Jejunum | straw | Positive | synthesis of ATP                       | 4.77E-04 | 37  |
|         | Rice  |          |                                        |          |     |
| Jejunum | straw | Positive | organization of actin cytoskeleton     | 4.78E-04 | 105 |
|         | Rice  |          |                                        |          |     |
| Jejunum | straw | Positive | laminopathy                            | 4.79E-04 | 30  |
|         | Rice  |          |                                        |          |     |
| Jejunum | straw | Positive | transport of alpha-amino acid          | 4.79E-04 | 30  |
|         | Rice  |          |                                        |          |     |
| Jejunum | straw | Positive | formation of lymphocytes               | 4.86E-04 | 48  |
|         | Rice  |          |                                        |          |     |
| Jejunum | straw | Positive | dephosphorylation of protein           | 4.90E-04 | 68  |
|         | Rice  |          |                                        |          |     |
| Jejunum | straw | Positive | apoptosis of fibroblasts               | 4.90E-04 | 78  |
|         | Rice  |          |                                        |          |     |
| Jejunum | straw | Positive | necrosis of cardiac muscle             | 4.90E-04 | 78  |
|         | Rice  |          |                                        |          |     |
| Jejunum | straw | Positive | cell death of neuroblastoma cell lines | 4.93E-04 | 70  |
|         | Rice  |          |                                        |          |     |
| Jejunum | straw | Positive | proliferation of immune cells          | 5.11E-04 | 261 |
|         | Rice  |          |                                        |          |     |
| Jejunum | straw | Positive | cell movement of leukocytes            | 5.34E-04 | 253 |
|         | Rice  |          |                                        |          |     |
| Jejunum | straw | Positive | internalization of lipid               | 5.47E-04 | 14  |
|         | Rice  |          |                                        |          |     |
| Jejunum | straw | Positive | development of mononuclear leukocytes  | 5.47E-04 | 187 |
|         | Rice  |          |                                        |          |     |
| Jejunum | straw | Positive | differentiation of bone                | 5.48E-04 | 140 |
|         | Rice  |          |                                        |          |     |
| Jejunum | straw | Positive | quantity of metal                      | 5.63E-04 | 168 |
| Jejunum | Rice  | Positive | dendritic growth/branching             | 5.63E-04 | 78  |

|         |       |          |                                         |          |      |  |
|---------|-------|----------|-----------------------------------------|----------|------|--|
|         | straw |          |                                         |          |      |  |
|         | Rice  |          |                                         |          |      |  |
| Jejunum | straw | Positive | cell movement of tumor cells            | 5.64E-04 | 67   |  |
|         | Rice  |          |                                         |          |      |  |
| Jejunum | straw | Positive | migration of cancer cells               | 5.71E-04 | 70   |  |
|         | Rice  |          |                                         |          |      |  |
| Jejunum | straw | Positive | recruitment of phagocytes               | 5.84E-04 | 87   |  |
|         | Rice  |          |                                         |          |      |  |
| Jejunum | straw | Positive | abnormal morphology of gonad            | 5.87E-04 | 125  |  |
|         | Rice  |          |                                         |          |      |  |
| Jejunum | straw | Positive | migration of vascular endothelial cells | 6.20E-04 | 61   |  |
|         | Rice  |          |                                         |          |      |  |
| Jejunum | straw | Positive | morphology of limb                      | 6.23E-04 | 82   |  |
|         | Rice  |          |                                         |          |      |  |
| Jejunum | straw | Positive | cell movement of myeloid cells          | 6.24E-04 | 181  |  |
|         | Rice  |          |                                         |          |      |  |
| Jejunum | straw | Positive | quantity of lymphatic system component  | 6.35E-04 | 129  |  |
|         | Rice  |          |                                         |          |      |  |
| Jejunum | straw | Positive | craniofacial abnormality                | 6.40E-04 | 122  |  |
|         | Rice  |          |                                         |          |      |  |
| Jejunum | straw | Positive | DNA replication                         | 6.52E-04 | 88   |  |
|         | Rice  |          |                                         |          |      |  |
| Jejunum | straw | Positive | ion homeostasis of cells                | 6.57E-04 | 186  |  |
|         | Rice  |          |                                         |          |      |  |
| Jejunum | straw | Positive | colon carcinoma                         | 6.57E-04 | 1077 |  |
|         | Rice  |          |                                         |          |      |  |
| Jejunum | straw | Positive | uptake of monosaccharide                | 6.61E-04 | 94   |  |
|         | Rice  |          |                                         |          |      |  |
| Jejunum | straw | Positive | development of lymphocytes              | 6.80E-04 | 185  |  |
|         | Rice  |          |                                         |          |      |  |
| Jejunum | straw | Positive | mammary tumor                           | 6.80E-04 | 519  |  |
|         | Rice  |          |                                         |          |      |  |
| Jejunum | straw | Positive | recruitment of macrophages              | 6.91E-04 | 41   |  |
|         | Rice  |          |                                         |          |      |  |
| Jejunum | straw | Positive | T cell homeostasis                      | 7.03E-04 | 173  |  |
|         | Rice  |          |                                         |          |      |  |
| Jejunum | straw | Positive | migration of fibroblasts                | 7.17E-04 | 53   |  |
|         | Rice  |          |                                         |          |      |  |
| Jejunum | straw | Positive | arrest in growth of organism            | 7.18E-04 | 61   |  |
|         | Rice  |          |                                         |          |      |  |
| Jejunum | straw | Positive | epileptic seizure                       | 7.18E-04 | 61   |  |
|         | Rice  |          |                                         |          |      |  |
| Jejunum | straw | Positive | size of lesion                          | 7.18E-04 | 89   |  |
| Jejunum | Rice  | Positive | synthesis of purine nucleotide          | 7.32E-04 | 63   |  |

|         |       |          |                                               |          |      |
|---------|-------|----------|-----------------------------------------------|----------|------|
|         | straw |          |                                               |          |      |
|         | Rice  |          |                                               |          |      |
| Jejunum | straw | Positive | abnormal morphology of muscle                 | 7.32E-04 | 109  |
|         | Rice  |          |                                               |          |      |
| Jejunum | straw | Positive | cell death of cervical cancer cell lines      | 7.39E-04 | 120  |
|         | Rice  |          |                                               |          |      |
| Jejunum | straw | Positive | apoptosis of heart cells                      | 7.53E-04 | 68   |
|         | Rice  |          |                                               |          |      |
| Jejunum | straw | Positive | development of hematopoietic progenitor cells | 7.53E-04 | 69   |
|         | Rice  |          |                                               |          |      |
| Jejunum | straw | Positive | differentiation of bone cells                 | 7.53E-04 | 138  |
|         | Rice  |          |                                               |          |      |
| Jejunum | straw | Positive | urothelial cancer                             | 7.63E-04 | 50   |
|         | Rice  |          |                                               |          |      |
| Jejunum | straw | Positive | cell death of muscle cells                    | 7.64E-04 | 115  |
|         | Rice  |          |                                               |          |      |
| Jejunum | straw | Positive | transport of mitochondria                     | 7.64E-04 | 13   |
|         | Rice  |          |                                               |          |      |
| Jejunum | straw | Positive | morphology of artery                          | 7.81E-04 | 57   |
|         | Rice  |          |                                               |          |      |
| Jejunum | straw | Positive | fertility                                     | 7.95E-04 | 124  |
|         | Rice  |          |                                               |          |      |
| Jejunum | straw | Positive | proliferation of hematopoietic cells          | 8.02E-04 | 89   |
|         | Rice  |          |                                               |          |      |
| Jejunum | straw | Positive | Wound                                         | 8.04E-04 | 80   |
|         | Rice  |          |                                               |          |      |
| Jejunum | straw | Positive | arthropathy                                   | 8.16E-04 | 309  |
|         | Rice  |          |                                               |          |      |
| Jejunum | straw | Positive | cell viability of cervical cancer cell lines  | 8.19E-04 | 78   |
|         | Rice  |          |                                               |          |      |
| Jejunum | straw | Positive | tumorigenesis of reproductive tract           | 8.33E-04 | 1050 |
|         | Rice  |          |                                               |          |      |
| Jejunum | straw | Positive | cell viability of carcinoma cell lines        | 8.36E-04 | 53   |
|         | Rice  |          |                                               |          |      |
| Jejunum | straw | Positive | binding of DNA                                | 8.39E-04 | 174  |
|         | Rice  |          |                                               |          |      |
| Jejunum | straw | Positive | formation of lymphoid organ                   | 8.49E-04 | 92   |
|         | Rice  |          |                                               |          |      |
| Jejunum | straw | Positive | quantity of carbohydrate                      | 8.71E-04 | 173  |
|         | Rice  |          |                                               |          |      |
| Jejunum | straw | Positive | quantity of metal ion                         | 8.82E-04 | 149  |
|         | Rice  |          |                                               |          |      |
| Jejunum | straw | Positive | seizures                                      | 9.00E-04 | 135  |
| Jejunum | Rice  | Positive | female genital tract cancer                   | 9.07E-04 | 1043 |

|         |       |          |                                    |          |      |
|---------|-------|----------|------------------------------------|----------|------|
|         | straw |          |                                    |          |      |
|         | Rice  |          |                                    |          |      |
| Jejunum | straw | Positive | abnormal morphology of skeleton    | 9.17E-04 | 94   |
|         | Rice  |          |                                    |          |      |
| Jejunum | straw | Positive | migration of tumor cells           | 9.20E-04 | 79   |
|         | Rice  |          |                                    |          |      |
| Jejunum | straw | Positive | experimentally-induced diabetes    | 9.28E-04 | 37   |
|         | Rice  |          |                                    |          |      |
| Jejunum | straw | Positive | metabolism of D-hexose             | 9.28E-04 | 37   |
|         | Rice  |          |                                    |          |      |
| Jejunum | straw | Positive | hepatobiliary system cancer        | 9.33E-04 | 1324 |
|         | Rice  |          |                                    |          |      |
| Jejunum | straw | Positive | formation of thymus gland          | 9.36E-04 | 59   |
|         | Rice  |          |                                    |          |      |
| Jejunum | straw | Positive | Thrombosis                         | 9.59E-04 | 61   |
|         | Rice  |          |                                    |          |      |
| Jejunum | straw | Positive | quantity of mononuclear leukocytes | 9.65E-04 | 241  |
|         | Rice  |          |                                    |          |      |
| Jejunum | straw | Positive | degeneration of eye                | 9.65E-04 | 91   |
|         | Rice  |          |                                    |          |      |
| Jejunum | straw | Positive | Breast Cancer and Tumors           | 9.69E-04 | 485  |
|         | Rice  |          |                                    |          |      |
| Jejunum | straw | Positive | cognitive impairment               | 9.69E-04 | 113  |
|         | Rice  |          |                                    |          |      |
| Jejunum | straw | Positive | size of animal                     | 9.69E-04 | 64   |
|         | Rice  |          |                                    |          |      |
| Jejunum | straw | Positive | development of hematopoietic cells | 9.69E-04 | 70   |
|         | Rice  |          |                                    |          |      |
| Jejunum | straw | Positive | transport of carbohydrate          | 9.69E-04 | 69   |
|         | Rice  |          |                                    |          |      |
| Jejunum | straw | Positive | apoptosis of cardiomyocytes        | 9.69E-04 | 66   |
|         | Rice  |          |                                    |          |      |
| Jejunum | straw | Positive | import of lipid                    | 9.69E-04 | 9    |
|         | Rice  |          |                                    |          |      |
| Jejunum | straw | Positive | cell death of renal glomerulus     | 9.75E-04 | 25   |
|         | Rice  |          |                                    |          |      |
| Jejunum | straw | Positive | psoriasis                          | 9.81E-04 | 194  |
|         | Rice  |          |                                    |          |      |
| Jejunum | straw | Positive | cellular infiltration of cells     | 9.87E-04 | 134  |
|         | Rice  |          |                                    |          |      |
| Jejunum | straw | Positive | cell movement of cancer cells      | 9.87E-04 | 54   |
|         | Rice  |          |                                    |          |      |
| Jejunum | straw | Positive | morphology of joint                | 9.87E-04 | 28   |
| Jejunum | Rice  | Positive | growth of yeast                    | 9.87E-04 | 38   |

|         |       |          |                                       |          |      |
|---------|-------|----------|---------------------------------------|----------|------|
|         | straw |          |                                       |          |      |
|         | Rice  |          |                                       |          |      |
| Jejunum | straw | Positive | cellular infiltration                 | 9.92E-04 | 147  |
|         | Rice  |          |                                       |          |      |
| Jejunum | straw | Positive | Lymphocyte homeostasis                | 9.99E-04 | 181  |
|         | Rice  |          |                                       |          |      |
| Jejunum | straw | Positive | arthritis                             | 1.03E-03 | 303  |
|         | Rice  |          |                                       |          |      |
| Jejunum | straw | Positive | cell death of muscle                  | 1.03E-03 | 117  |
|         | Rice  |          |                                       |          |      |
| Jejunum | straw | Positive | abnormal morphology of skull          | 1.03E-03 | 77   |
|         | Rice  |          |                                       |          |      |
| Jejunum | straw | Positive | cell death of fibrosarcoma cell lines | 1.03E-03 | 30   |
|         | Rice  |          |                                       |          |      |
| Jejunum | straw | Positive | tumorigenesis of genital organ        | 1.03E-03 | 1196 |
|         | Rice  |          |                                       |          |      |
| Jejunum | straw | Positive | homeostasis of leukocytes             | 1.03E-03 | 184  |
|         | Rice  |          |                                       |          |      |
| Jejunum | straw | Positive | replication of virus                  | 1.03E-03 | 186  |
|         | Rice  |          |                                       |          |      |
| Jejunum | straw | Positive | morphology of right ventricle         | 1.03E-03 | 24   |
|         | Rice  |          |                                       |          |      |
| Jejunum | straw | Positive | autosomal dominant myopathy           | 1.04E-03 | 34   |
|         | Rice  |          |                                       |          |      |
| Jejunum | straw | Positive | urothelial neoplasm                   | 1.07E-03 | 51   |
|         | Rice  |          |                                       |          |      |
| Jejunum | straw | Positive | abnormal morphology of joint          | 1.08E-03 | 27   |
|         | Rice  |          |                                       |          |      |
| Jejunum | straw | Positive | hypersensitive reaction               | 1.08E-03 | 144  |
|         | Rice  |          |                                       |          |      |
| Jejunum | straw | Positive | retinal degeneration                  | 1.08E-03 | 89   |
|         | Rice  |          |                                       |          |      |
| Jejunum | straw | Positive | litter size                           | 1.09E-03 | 66   |
|         | Rice  |          |                                       |          |      |
| Jejunum | straw | Positive | cell death of brain cells             | 1.09E-03 | 94   |
|         | Rice  |          |                                       |          |      |
| Jejunum | straw | Positive | apoptosis of neurons                  | 1.10E-03 | 146  |
|         | Rice  |          |                                       |          |      |
| Jejunum | straw | Positive | necrosis of renal glomerulus          | 1.10E-03 | 23   |
|         | Rice  |          |                                       |          |      |
| Jejunum | straw | Positive | abnormal morphology of limb           | 1.11E-03 | 80   |
|         | Rice  |          |                                       |          |      |
| Jejunum | straw | Positive | growth of muscle tissue               | 1.13E-03 | 126  |
| Jejunum | Rice  | Positive | serous neoplasm                       | 1.13E-03 | 201  |

|         |       |          |                                            |          |      |
|---------|-------|----------|--------------------------------------------|----------|------|
|         | straw |          |                                            |          |      |
|         | Rice  |          |                                            |          |      |
| Jejunum | straw | Positive | liver tumor                                | 1.14E-03 | 1325 |
|         | Rice  |          |                                            |          |      |
| Jejunum | straw | Positive | targeting of protein                       | 1.14E-03 | 48   |
|         | Rice  |          |                                            |          |      |
| Jejunum | straw | Positive | abnormal morphology of abdomen             | 1.14E-03 | 284  |
|         | Rice  |          |                                            |          |      |
| Jejunum | straw | Positive | hereditary motor and sensory neuropathy    | 1.14E-03 | 35   |
|         | Rice  |          |                                            |          |      |
| Jejunum | straw | Positive | metabolism of D-glucose                    | 1.14E-03 | 35   |
|         | Rice  |          |                                            |          |      |
| Jejunum | straw | Positive | G1 phase                                   | 1.14E-03 | 131  |
|         | Rice  |          |                                            |          |      |
| Jejunum | straw | Positive | morphology of skeleton                     | 1.15E-03 | 96   |
|         | Rice  |          |                                            |          |      |
| Jejunum | straw | Positive | consumption of oxygen                      | 1.16E-03 | 56   |
|         | Rice  |          |                                            |          |      |
| Jejunum | straw | Positive | formation of lymphatic system component    | 1.16E-03 | 100  |
|         | Rice  |          | autosomal dominant Emery-Dreifuss muscular |          |      |
| Jejunum | straw | Positive | dystrophy                                  | 1.16E-03 | 26   |
|         | Rice  |          |                                            |          |      |
| Jejunum | straw | Positive | proliferation of mononuclear leukocytes    | 1.16E-03 | 241  |
|         | Rice  |          |                                            |          |      |
| Jejunum | straw | Positive | permeability of cells                      | 1.18E-03 | 38   |
|         | Rice  |          |                                            |          |      |
| Jejunum | straw | Positive | proliferation of T lymphocytes             | 1.19E-03 | 199  |
|         | Rice  |          |                                            |          |      |
| Jejunum | straw | Positive | arrest in growth of embryo                 | 1.20E-03 | 59   |
|         | Rice  |          |                                            |          |      |
| Jejunum | straw | Positive | necrosis of muscle                         | 1.25E-03 | 116  |
|         | Rice  |          |                                            |          |      |
| Jejunum | straw | Positive | synthesis of protein                       | 1.25E-03 | 149  |
|         | Rice  |          |                                            |          |      |
| Jejunum | straw | Positive | breast cancer                              | 1.25E-03 | 482  |
|         | Rice  |          |                                            |          |      |
| Jejunum | straw | Positive | oral cancer                                | 1.25E-03 | 79   |
|         | Rice  |          |                                            |          |      |
| Jejunum | straw | Positive | proliferation of muscle cells              | 1.25E-03 | 125  |
|         | Rice  |          |                                            |          |      |
| Jejunum | straw | Positive | apoptosis of epithelial cell lines         | 1.27E-03 | 78   |
|         | Rice  |          |                                            |          |      |
| Jejunum | straw | Positive | juvenile dermatomyositis                   | 1.27E-03 | 25   |
| Jejunum | Rice  | Positive | morphology of cardiovascular tissue        | 1.28E-03 | 34   |



|         |       |          |                                                 |          |      |
|---------|-------|----------|-------------------------------------------------|----------|------|
|         | straw |          |                                                 |          |      |
|         | Rice  |          | abnormal morphology of vascular endothelial     |          |      |
| Jejunum | straw | Positive | cells                                           | 1.28E-03 | 19   |
|         | Rice  |          |                                                 |          |      |
| Jejunum | straw | Positive | morphology of brain                             | 1.28E-03 | 155  |
|         | Rice  |          |                                                 |          |      |
| Jejunum | straw | Positive | quantity of lymphocytes                         | 1.29E-03 | 231  |
|         | Rice  |          |                                                 |          |      |
| Jejunum | straw | Positive | proliferation of hematopoietic progenitor cells | 1.29E-03 | 84   |
|         | Rice  |          |                                                 |          |      |
| Jejunum | straw | Positive | morphology of bone                              | 1.29E-03 | 150  |
|         | Rice  |          |                                                 |          |      |
| Jejunum | straw | Positive | formation of actin stress fibers                | 1.31E-03 | 83   |
|         | Rice  |          |                                                 |          |      |
| Jejunum | straw | Positive | genital tract cancer                            | 1.32E-03 | 1184 |
|         | Rice  |          |                                                 |          |      |
| Jejunum | straw | Positive | proliferation of lymphocytes                    | 1.33E-03 | 237  |
|         | Rice  |          |                                                 |          |      |
| Jejunum | straw | Positive | liver cancer                                    | 1.35E-03 | 1315 |
|         | Rice  |          |                                                 |          |      |
| Jejunum | straw | Positive | mental retardation                              | 1.35E-03 | 81   |
|         | Rice  |          |                                                 |          |      |
| Jejunum | straw | Positive | transitional cell bladder cancer                | 1.36E-03 | 44   |
|         | Rice  |          |                                                 |          |      |
| Jejunum | straw | Positive | transport of amino acids                        | 1.36E-03 | 49   |
|         | Rice  |          |                                                 |          |      |
| Jejunum | straw | Positive | development of lymphatic system component       | 1.36E-03 | 105  |
|         | Rice  |          |                                                 |          |      |
| Jejunum | straw | Positive | morphology of muscle cells                      | 1.37E-03 | 59   |
|         | Rice  |          |                                                 |          |      |
| Jejunum | straw | Positive | abnormal morphology of blood vessel             | 1.40E-03 | 91   |
|         | Rice  |          |                                                 |          |      |
| Jejunum | straw | Positive | morphology of skull                             | 1.41E-03 | 78   |
|         | Rice  |          |                                                 |          |      |
| Jejunum | straw | Positive | seizure disorder                                | 1.44E-03 | 156  |
|         | Rice  |          |                                                 |          |      |
| Jejunum | straw | Positive | cellular infiltration of blood cells            | 1.52E-03 | 130  |
|         | Rice  |          |                                                 |          |      |
| Jejunum | straw | Positive | differentiation of tumor cell lines             | 1.53E-03 | 127  |
|         | Rice  |          |                                                 |          |      |
| Jejunum | straw | Positive | abnormal morphology of body wall                | 1.55E-03 | 39   |
|         | Rice  |          |                                                 |          |      |
| Jejunum | straw | Positive | cell death of lymphocytes                       | 1.57E-03 | 129  |
| Jejunum | Rice  | Positive | secretory pathway                               | 1.57E-03 | 69   |

|         |       |          |                                          |          |      |
|---------|-------|----------|------------------------------------------|----------|------|
|         | straw |          |                                          |          |      |
|         | Rice  |          |                                          |          |      |
| Jejunum | straw | Positive | quantity of cellular protrusions         | 1.58E-03 | 57   |
|         | Rice  |          |                                          |          |      |
| Jejunum | straw | Positive | formation of skin                        | 1.58E-03 | 123  |
|         | Rice  |          |                                          |          |      |
| Jejunum | straw | Positive | degeneration of central nervous system   | 1.58E-03 | 48   |
|         | Rice  |          | abnormal morphology of central nervous   |          |      |
| Jejunum | straw | Positive | system                                   | 1.58E-03 | 160  |
|         | Rice  |          |                                          |          |      |
| Jejunum | straw | Positive | branching of vasculature                 | 1.59E-03 | 14   |
|         | Rice  |          |                                          |          |      |
| Jejunum | straw | Positive | internalization of cells                 | 1.59E-03 | 59   |
|         | Rice  |          |                                          |          |      |
| Jejunum | straw | Positive | cell movement of connective tissue cells | 1.62E-03 | 77   |
|         | Rice  |          |                                          |          |      |
| Jejunum | straw | Positive | endometrium tumor                        | 1.63E-03 | 887  |
|         | Rice  |          |                                          |          |      |
| Jejunum | straw | Positive | proliferation of bone marrow cells       | 1.64E-03 | 44   |
|         | Rice  |          |                                          |          |      |
| Jejunum | straw | Positive | cell viability of epithelial cell lines  | 1.64E-03 | 37   |
|         | Rice  |          |                                          |          |      |
| Jejunum | straw | Positive | glioma cancer                            | 1.66E-03 | 105  |
|         | Rice  |          |                                          |          |      |
| Jejunum | straw | Positive | function of myeloid cells                | 1.68E-03 | 82   |
|         | Rice  |          |                                          |          |      |
| Jejunum | straw | Positive | apoptosis of neuroblastoma cell lines    | 1.70E-03 | 45   |
|         | Rice  |          |                                          |          |      |
| Jejunum | straw | Positive | metabolism of monosaccharide             | 1.70E-03 | 45   |
|         | Rice  |          |                                          |          |      |
| Jejunum | straw | Positive | development of digestive system          | 1.75E-03 | 128  |
|         | Rice  |          |                                          |          |      |
| Jejunum | straw | Positive | cell movement of epithelial cells        | 1.75E-03 | 53   |
|         | Rice  |          |                                          |          |      |
| Jejunum | straw | Positive | morphology of mitochondria               | 1.76E-03 | 38   |
|         | Rice  |          |                                          |          |      |
| Jejunum | straw | Positive | inflammatory response                    | 1.76E-03 | 252  |
|         | Rice  |          |                                          |          |      |
| Jejunum | straw | Positive | abnormal morphology of artery            | 1.76E-03 | 54   |
|         | Rice  |          |                                          |          |      |
| Jejunum | straw | Positive | colon adenocarcinoma                     | 1.84E-03 | 1049 |
|         | Rice  |          |                                          |          |      |
| Jejunum | straw | Positive | hereditary spastic paraplegia            | 1.87E-03 | 19   |
| Jejunum | Rice  | Positive | catabolism of protein                    | 1.88E-03 | 197  |

|         |       |          |                                           |          |      |
|---------|-------|----------|-------------------------------------------|----------|------|
|         | straw |          |                                           |          |      |
|         | Rice  |          |                                           |          |      |
| Jejunum | straw | Positive | quantity of connective tissue             | 1.88E-03 | 197  |
|         | Rice  |          |                                           |          |      |
| Jejunum | straw | Positive | adhesion of immune cells                  | 1.88E-03 | 117  |
|         | Rice  |          |                                           |          |      |
| Jejunum | straw | Positive | gliosis of brain                          | 1.91E-03 | 18   |
|         | Rice  |          |                                           |          |      |
| Jejunum | straw | Positive | organization of peroxisomes               | 1.92E-03 | 12   |
|         | Rice  |          |                                           |          |      |
| Jejunum | straw | Positive | formation of connective tissue cells      | 1.93E-03 | 73   |
|         | Rice  |          |                                           |          |      |
| Jejunum | straw | Positive | quantity of thymus gland                  | 1.95E-03 | 80   |
|         | Rice  |          |                                           |          |      |
| Jejunum | straw | Positive | metabolism of hexose                      | 1.98E-03 | 40   |
|         | Rice  |          |                                           |          |      |
| Jejunum | straw | Positive | disorder of pregnancy                     | 1.98E-03 | 162  |
|         | Rice  |          |                                           |          |      |
| Jejunum | straw | Positive | cellular infiltration by leukocytes       | 2.00E-03 | 129  |
|         | Rice  |          |                                           |          |      |
| Jejunum | straw | Positive | cell movement of phagocytes               | 2.00E-03 | 180  |
|         | Rice  |          |                                           |          |      |
| Jejunum | straw | Positive | abnormal morphology of endothelial tissue | 2.01E-03 | 26   |
|         | Rice  |          |                                           |          |      |
| Jejunum | straw | Positive | transport of L-amino acid                 | 2.01E-03 | 26   |
|         | Rice  |          |                                           |          |      |
| Jejunum | straw | Negative | proliferation of cells                    | 6.06E-47 | 1645 |
|         | Rice  |          |                                           |          |      |
| Jejunum | straw | Negative | malignant solid tumor                     | 6.16E-42 | 4107 |
|         | Rice  |          |                                           |          |      |
| Jejunum | straw | Negative | cancer                                    | 6.16E-42 | 4151 |
|         | Rice  |          |                                           |          |      |
| Jejunum | straw | Negative | morbidity or mortality                    | 1.21E-38 | 1122 |
|         | Rice  |          |                                           |          |      |
| Jejunum | straw | Negative | organismal death                          | 1.21E-38 | 1109 |
|         | Rice  |          |                                           |          |      |
| Jejunum | straw | Negative | cell death                                | 9.65E-38 | 1467 |
|         | Rice  |          |                                           |          |      |
| Jejunum | straw | Negative | morphology of cells                       | 5.05E-33 | 909  |
|         | Rice  |          |                                           |          |      |
| Jejunum | straw | Negative | apoptosis                                 | 9.13E-32 | 1175 |
|         | Rice  |          |                                           |          |      |
| Jejunum | straw | Negative | organization of cytoplasm                 | 6.12E-31 | 735  |
| Jejunum | Rice  | Negative | cell movement                             | 1.34E-29 | 966  |

|         |       |          |                                |          |      |
|---------|-------|----------|--------------------------------|----------|------|
|         | straw |          |                                |          |      |
|         | Rice  |          |                                |          |      |
| Jejunum | straw | Negative | necrosis                       | 2.43E-29 | 1136 |
|         | Rice  |          |                                |          |      |
| Jejunum | straw | Negative | tumorigenesis of tissue        | 1.15E-28 | 3465 |
|         | Rice  |          |                                |          |      |
| Jejunum | straw | Negative | neoplasia of epithelial tissue | 1.42E-28 | 3413 |
|         | Rice  |          |                                |          |      |
| Jejunum | straw | Negative | epithelial cancer              | 4.50E-27 | 3375 |
|         | Rice  |          |                                |          |      |
| Jejunum | straw | Negative | organization of cytoskeleton   | 4.85E-26 | 660  |
|         | Rice  |          |                                |          |      |
| Jejunum | straw | Negative | abdominal neoplasm             | 6.11E-25 | 3368 |
|         | Rice  |          |                                |          |      |
| Jejunum | straw | Negative | migration of cells             | 2.46E-24 | 854  |
|         | Rice  |          |                                |          |      |
| Jejunum | straw | Negative | differentiation of cells       | 5.51E-23 | 982  |
|         | Rice  |          |                                |          |      |
| Jejunum | straw | Negative | abdominal cancer               | 7.13E-23 | 3319 |
|         | Rice  |          |                                |          |      |
| Jejunum | straw | Negative | microtubule dynamics           | 6.85E-21 | 554  |
|         | Rice  |          |                                |          |      |
| Jejunum | straw | Negative | transport of molecule          | 6.91E-21 | 724  |
|         | Rice  |          |                                |          |      |
| Jejunum | straw | Negative | cellular homeostasis           | 8.70E-21 | 688  |
|         | Rice  |          |                                |          |      |
| Jejunum | straw | Negative | expression of RNA              | 9.42E-20 | 925  |
|         | Rice  |          |                                |          |      |
| Jejunum | straw | Negative | angiogenesis                   | 4.00E-19 | 434  |
|         | Rice  |          |                                |          |      |
| Jejunum | straw | Negative | transcription of RNA           | 5.52E-19 | 810  |
|         | Rice  |          |                                |          |      |
| Jejunum | straw | Negative | cell death of tumor cell lines | 5.80E-19 | 681  |
|         | Rice  |          |                                |          |      |
| Jejunum | straw | Negative | transcription                  | 7.13E-19 | 862  |
|         | Rice  |          |                                |          |      |
| Jejunum | straw | Negative | cell survival                  | 1.30E-18 | 627  |
|         | Rice  |          |                                |          |      |
| Jejunum | straw | Negative | quantity of cells              | 6.01E-18 | 770  |
|         | Rice  |          |                                |          |      |
| Jejunum | straw | Negative | cell viability                 | 2.01E-17 | 585  |
|         | Rice  |          |                                |          |      |
| Jejunum | straw | Negative | vasculogenesis                 | 5.10E-17 | 355  |
| Jejunum | Rice  | Negative | digestive organ tumor          | 1.79E-16 | 2882 |

|         |       |          |                                          |          |      |
|---------|-------|----------|------------------------------------------|----------|------|
|         | straw |          |                                          |          |      |
|         | Rice  |          |                                          |          |      |
| Jejunum | straw | Negative | abnormal morphology of cells             | 4.10E-16 | 565  |
|         | Rice  |          |                                          |          |      |
| Jejunum | straw | Negative | formation of cellular protrusions        | 4.50E-16 | 420  |
|         | Rice  |          |                                          |          |      |
| Jejunum | straw | Negative | digestive system cancer                  | 9.36E-16 | 2851 |
|         | Rice  |          |                                          |          |      |
| Jejunum | straw | Negative | Viral Infection                          | 1.03E-15 | 698  |
|         | Rice  |          |                                          |          |      |
| Jejunum | straw | Negative | apoptosis of tumor cell lines            | 2.34E-15 | 540  |
|         | Rice  |          |                                          |          |      |
| Jejunum | straw | Negative | organization of organelle                | 2.77E-15 | 265  |
|         | Rice  |          |                                          |          |      |
| Jejunum | straw | Negative | cell movement of tumor cell lines        | 4.22E-15 | 395  |
|         | Rice  |          |                                          |          |      |
| Jejunum | straw | Negative | Movement Disorders                       | 5.94E-15 | 478  |
|         | Rice  |          |                                          |          |      |
| Jejunum | straw | Negative | proliferation of tumor cell lines        | 9.02E-15 | 668  |
|         | Rice  |          |                                          |          |      |
| Jejunum | straw | Negative | cell death of connective tissue cells    | 1.03E-14 | 290  |
|         | Rice  |          |                                          |          |      |
| Jejunum | straw | Negative | proliferation of connective tissue cells | 1.75E-14 | 285  |
|         | Rice  |          |                                          |          |      |
| Jejunum | straw | Negative | size of body                             | 3.10E-14 | 391  |
|         | Rice  |          |                                          |          |      |
| Jejunum | straw | Negative | morphology of cardiovascular system      | 3.88E-14 | 295  |
|         | Rice  |          |                                          |          |      |
| Jejunum | straw | Negative | homing of cells                          | 6.72E-14 | 268  |
|         | Rice  |          |                                          |          |      |
| Jejunum | straw | Negative | autosomal recessive disease              | 7.04E-14 | 418  |
|         | Rice  |          |                                          |          |      |
| Jejunum | straw | Negative | growth of connective tissue              | 8.37E-14 | 304  |
|         | Rice  |          |                                          |          |      |
| Jejunum | straw | Negative | migration of blood cells                 | 8.87E-14 | 398  |
|         | Rice  |          |                                          |          |      |
| Jejunum | straw | Negative | leukocyte migration                      | 1.10E-13 | 397  |
|         | Rice  |          |                                          |          |      |
| Jejunum | straw | Negative | quantity of blood cells                  | 1.25E-13 | 459  |
|         | Rice  |          |                                          |          |      |
| Jejunum | straw | Negative | phosphorylation of protein               | 1.25E-13 | 341  |
|         | Rice  |          |                                          |          |      |
| Jejunum | straw | Negative | function of cardiovascular system        | 1.34E-13 | 186  |
| Jejunum | Rice  | Negative | transcription of DNA                     | 1.49E-13 | 656  |

|         |       |          |                                |          |     |
|---------|-------|----------|--------------------------------|----------|-----|
|         | straw |          |                                |          |     |
|         | Rice  |          |                                |          |     |
| Jejunum | straw | Negative | homing                         | 1.94E-13 | 273 |
|         | Rice  |          |                                |          |     |
| Jejunum | straw | Negative | quantity of leukocytes         | 2.54E-13 | 413 |
|         | Rice  |          |                                |          |     |
| Jejunum | straw | Negative | concentration of lipid         | 5.97E-13 | 369 |
|         | Rice  |          |                                |          |     |
| Jejunum | straw | Negative | cell spreading                 | 8.04E-13 | 143 |
|         | Rice  |          |                                |          |     |
| Jejunum | straw | Negative | chemotaxis of cells            | 8.72E-13 | 251 |
|         | Rice  |          |                                |          |     |
| Jejunum | straw | Negative | development of cytoplasm       | 1.08E-12 | 223 |
|         | Rice  |          |                                |          |     |
| Jejunum | straw | Negative | Growth Failure                 | 1.48E-12 | 280 |
|         | Rice  |          |                                |          |     |
| Jejunum | straw | Negative | chemotaxis                     | 2.14E-12 | 257 |
|         | Rice  |          |                                |          |     |
| Jejunum | straw | Negative | cell movement of leukocytes    | 2.96E-12 | 348 |
|         | Rice  |          |                                |          |     |
| Jejunum | straw | Negative | formation of cytoskeleton      | 5.22E-12 | 184 |
|         | Rice  |          |                                |          |     |
| Jejunum | straw | Negative | proliferation of fibroblasts   | 5.24E-12 | 174 |
|         | Rice  |          |                                |          |     |
| Jejunum | straw | Negative | metabolism of carbohydrate     | 5.74E-12 | 287 |
|         | Rice  |          |                                |          |     |
| Jejunum | straw | Negative | invasion of cells              | 6.14E-12 | 388 |
|         | Rice  |          |                                |          |     |
| Jejunum | straw | Negative | protein kinase cascade         | 6.51E-12 | 203 |
|         | Rice  |          |                                |          |     |
| Jejunum | straw | Negative | synthesis of lipid             | 6.63E-12 | 325 |
|         | Rice  |          |                                |          |     |
| Jejunum | straw | Negative | migration of tumor cell lines  | 1.84E-11 | 320 |
|         | Rice  |          |                                |          |     |
| Jejunum | straw | Negative | inflammatory response          | 2.06E-11 | 349 |
|         | Rice  |          |                                |          |     |
| Jejunum | straw | Negative | development of body trunk      | 2.66E-11 | 482 |
|         | Rice  |          |                                |          |     |
| Jejunum | straw | Negative | growth of organism             | 3.43E-11 | 371 |
|         | Rice  |          |                                |          |     |
| Jejunum | straw | Negative | growth of embryo               | 3.43E-11 | 224 |
|         | Rice  |          |                                |          |     |
| Jejunum | straw | Negative | cell movement of myeloid cells | 4.13E-11 | 250 |
| Jejunum | Rice  | Negative | fibrogenesis                   | 4.20E-11 | 196 |

|         |       |          |                                              |          |     |
|---------|-------|----------|----------------------------------------------|----------|-----|
|         | straw |          |                                              |          |     |
|         | Rice  |          |                                              |          |     |
| Jejunum | straw | Negative | necrosis of epithelial tissue                | 4.36E-11 | 270 |
|         | Rice  |          |                                              |          |     |
| Jejunum | straw | Negative | ubiquitination                               | 5.20E-11 | 164 |
|         | Rice  |          |                                              |          |     |
| Jejunum | straw | Negative | function of blood cells                      | 8.24E-11 | 268 |
|         | Rice  |          |                                              |          |     |
| Jejunum | straw | Negative | development of vasculature                   | 8.24E-11 | 198 |
|         | Rice  |          |                                              |          |     |
| Jejunum | straw | Negative | morphology of body cavity                    | 9.20E-11 | 509 |
|         | Rice  |          |                                              |          |     |
| Jejunum | straw | Negative | formation of filaments                       | 9.27E-11 | 189 |
|         | Rice  |          |                                              |          |     |
| Jejunum | straw | Negative | ubiquitination of protein                    | 9.27E-11 | 161 |
|         | Rice  |          |                                              |          |     |
| Jejunum | straw | Negative | disorder of basal ganglia                    | 9.36E-11 | 341 |
|         | Rice  |          |                                              |          |     |
| Jejunum | straw | Negative | transactivation                              | 1.05E-10 | 264 |
|         | Rice  |          |                                              |          |     |
| Jejunum | straw | Negative | morphology of heart                          | 1.13E-10 | 192 |
|         | Rice  |          |                                              |          |     |
| Jejunum | straw | Negative | cell cycle progression                       | 1.30E-10 | 451 |
|         | Rice  |          |                                              |          |     |
| Jejunum | straw | Negative | abnormal morphology of thoracic cavity       | 1.35E-10 | 267 |
|         | Rice  |          |                                              |          |     |
| Jejunum | straw | Negative | cell death of fibroblast cell lines          | 2.25E-10 | 200 |
|         | Rice  |          |                                              |          |     |
| Jejunum | straw | Negative | colony formation of cells                    | 2.26E-10 | 227 |
|         | Rice  |          |                                              |          |     |
| Jejunum | straw | Negative | degeneration of cells                        | 2.26E-10 | 165 |
|         | Rice  |          |                                              |          |     |
| Jejunum | straw | Negative | Huntington's Disease                         | 2.43E-10 | 261 |
|         | Rice  |          |                                              |          |     |
| Jejunum | straw | Negative | apoptosis of fibroblast cell lines           | 2.53E-10 | 158 |
|         | Rice  |          |                                              |          |     |
| Jejunum | straw | Negative | abnormal morphology of cardiovascular system | 2.53E-10 | 258 |
|         | Rice  |          |                                              |          |     |
| Jejunum | straw | Negative | activation of cells                          | 3.19E-10 | 422 |
|         | Rice  |          |                                              |          |     |
| Jejunum | straw | Negative | abnormal morphology of body cavity           | 3.74E-10 | 485 |
|         | Rice  |          |                                              |          |     |
| Jejunum | straw | Negative | differentiation of connective tissue cells   | 3.74E-10 | 288 |
| Jejunum | Rice  | Negative | invasion of tumor cell lines                 | 3.89E-10 | 297 |

|         |       |          |                                       |          |     |
|---------|-------|----------|---------------------------------------|----------|-----|
|         | straw |          |                                       |          |     |
|         | Rice  |          |                                       |          |     |
| Jejunum | straw | Negative | proliferation of blood cells          | 3.89E-10 | 368 |
|         | Rice  |          |                                       |          |     |
| Jejunum | straw | Negative | dyskinesia                            | 4.59E-10 | 277 |
|         | Rice  |          |                                       |          |     |
| Jejunum | straw | Negative | formation of muscle                   | 5.07E-10 | 186 |
|         | Rice  |          |                                       |          |     |
| Jejunum | straw | Negative | metabolism of protein                 | 7.57E-10 | 418 |
|         | Rice  |          |                                       |          |     |
| Jejunum | straw | Negative | neurological signs                    | 7.60E-10 | 290 |
|         | Rice  |          |                                       |          |     |
| Jejunum | straw | Negative | cell viability of tumor cell lines    | 8.40E-10 | 341 |
|         | Rice  |          |                                       |          |     |
| Jejunum | straw | Negative | activation of DNA endogenous promoter | 9.12E-10 | 509 |
|         | Rice  |          |                                       |          |     |
| Jejunum | straw | Negative | proliferation of neuronal cells       | 9.32E-10 | 259 |
|         | Rice  |          |                                       |          |     |
| Jejunum | straw | Negative | development of neurons                | 9.91E-10 | 342 |
|         | Rice  |          |                                       |          |     |
| Jejunum | straw | Negative | differentiation of connective tissue  | 9.97E-10 | 321 |
|         | Rice  |          |                                       |          |     |
| Jejunum | straw | Negative | cell movement of fibroblasts          | 1.03E-09 | 94  |
|         | Rice  |          |                                       |          |     |
| Jejunum | straw | Negative | mitosis                               | 1.04E-09 | 226 |
|         | Rice  |          |                                       |          |     |
| Jejunum | straw | Negative | morphology of muscle                  | 1.04E-09 | 159 |
|         | Rice  |          |                                       |          |     |
| Jejunum | straw | Negative | Neurodegeneration                     | 2.02E-09 | 147 |
|         | Rice  |          |                                       |          |     |
| Jejunum | straw | Negative | neuromuscular disease                 | 2.24E-09 | 380 |
|         | Rice  |          |                                       |          |     |
| Jejunum | straw | Negative | cell transformation                   | 2.29E-09 | 210 |
|         | Rice  |          |                                       |          |     |
| Jejunum | straw | Negative | colony formation                      | 2.50E-09 | 241 |
|         | Rice  |          |                                       |          |     |
| Jejunum | straw | Negative | infection of cells                    | 2.54E-09 | 346 |
|         | Rice  |          |                                       |          |     |
| Jejunum | straw | Negative | cell movement of phagocytes           | 2.74E-09 | 246 |
|         | Rice  |          |                                       |          |     |
| Jejunum | straw | Negative | function of leukocytes                | 2.88E-09 | 241 |
|         | Rice  |          |                                       |          |     |
| Jejunum | straw | Negative | quantity of connective tissue         | 4.07E-09 | 267 |
| Jejunum | Rice  | Negative | neuritogenesis                        | 4.08E-09 | 259 |



|         |       |          |                                          |          |     |
|---------|-------|----------|------------------------------------------|----------|-----|
|         | straw |          |                                          |          |     |
|         | Rice  |          |                                          |          |     |
| Jejunum | straw | Negative | development of blood cells               | 4.25E-09 | 287 |
|         | Rice  |          |                                          |          |     |
| Jejunum | straw | Negative | vascularization                          | 4.62E-09 | 115 |
|         | Rice  |          |                                          |          |     |
| Jejunum | straw | Negative | cell death of muscle                     | 6.48E-09 | 160 |
|         | Rice  |          |                                          |          |     |
| Jejunum | straw | Negative | degeneration of nervous system           | 6.63E-09 | 136 |
|         | Rice  |          |                                          |          |     |
| Jejunum | straw | Negative | synthesis of reactive oxygen species     | 6.63E-09 | 216 |
|         | Rice  |          |                                          |          |     |
| Jejunum | straw | Negative | transactivation of RNA                   | 6.63E-09 | 242 |
|         | Rice  |          |                                          |          |     |
| Jejunum | straw | Negative | growth of epithelial tissue              | 6.63E-09 | 297 |
|         | Rice  |          |                                          |          |     |
| Jejunum | straw | Negative | engulfment of cells                      | 6.63E-09 | 186 |
|         | Rice  |          |                                          |          |     |
| Jejunum | straw | Negative | replication of virus                     | 7.10E-09 | 249 |
|         | Rice  |          |                                          |          |     |
| Jejunum | straw | Negative | length of cells                          | 7.23E-09 | 56  |
|         | Rice  |          |                                          |          |     |
| Jejunum | straw | Negative | cell death of muscle cells               | 7.83E-09 | 156 |
|         | Rice  |          |                                          |          |     |
| Jejunum | straw | Negative | Hypertrophy                              | 7.91E-09 | 213 |
|         | Rice  |          |                                          |          |     |
| Jejunum | straw | Negative | necrosis of muscle                       | 7.91E-09 | 159 |
|         | Rice  |          |                                          |          |     |
| Jejunum | straw | Negative | proliferation of immune cells            | 8.15E-09 | 341 |
|         | Rice  |          |                                          |          |     |
| Jejunum | straw | Negative | behavior                                 | 8.54E-09 | 418 |
|         | Rice  |          |                                          |          |     |
| Jejunum | straw | Negative | replication of RNA virus                 | 9.37E-09 | 226 |
|         | Rice  |          |                                          |          |     |
| Jejunum | straw | Negative | cell movement of endothelial cells       | 1.11E-08 | 163 |
|         | Rice  |          |                                          |          |     |
| Jejunum | straw | Negative | development of epithelial tissue         | 1.11E-08 | 230 |
|         | Rice  |          |                                          |          |     |
| Jejunum | straw | Negative | metabolism of membrane lipid derivative  | 1.15E-08 | 177 |
|         | Rice  |          |                                          |          |     |
| Jejunum | straw | Negative | cell movement of connective tissue cells | 1.15E-08 | 108 |
|         | Rice  |          |                                          |          |     |
| Jejunum | straw | Negative | degeneration of neurons                  | 1.19E-08 | 115 |
| Jejunum | Rice  | Negative | quantity of phagocytes                   | 1.20E-08 | 192 |

|         |       |          |                                          |          |     |
|---------|-------|----------|------------------------------------------|----------|-----|
|         | straw |          |                                          |          |     |
|         | Rice  |          |                                          |          |     |
| Jejunum | straw | Negative | recruitment of cells                     | 1.23E-08 | 164 |
|         | Rice  |          |                                          |          |     |
| Jejunum | straw | Negative | formation of plasma membrane projections | 1.24E-08 | 262 |
|         | Rice  |          |                                          |          |     |
| Jejunum | straw | Negative | abnormal morphology of heart             | 1.27E-08 | 175 |
|         | Rice  |          |                                          |          |     |
| Jejunum | straw | Negative | secretory pathway                        | 1.41E-08 | 97  |
|         | Rice  |          |                                          |          |     |
| Jejunum | straw | Negative | quantity of lymphocytes                  | 1.47E-08 | 306 |
|         | Rice  |          |                                          |          |     |
| Jejunum | straw | Negative | quantity of mononuclear leukocytes       | 1.55E-08 | 317 |
|         | Rice  |          |                                          |          |     |
| Jejunum | straw | Negative | cell death of epithelial cells           | 1.75E-08 | 221 |
|         | Rice  |          |                                          |          |     |
| Jejunum | straw | Negative | proliferation of fibroblast cell lines   | 1.76E-08 | 191 |
|         | Rice  |          |                                          |          |     |
| Jejunum | straw | Negative | metabolism of reactive oxygen species    | 1.89E-08 | 222 |
|         | Rice  |          |                                          |          |     |
| Jejunum | straw | Negative | morphology of connective tissue          | 1.96E-08 | 206 |
|         | Rice  |          |                                          |          |     |
| Jejunum | straw | Negative | organization of actin cytoskeleton       | 2.21E-08 | 140 |
|         | Rice  |          |                                          |          |     |
| Jejunum | straw | Negative | development of connective tissue         | 2.21E-08 | 169 |
|         | Rice  |          |                                          |          |     |
| Jejunum | straw | Negative | vascularization of body region           | 2.62E-08 | 70  |
|         | Rice  |          |                                          |          |     |
| Jejunum | straw | Negative | function of muscle                       | 2.90E-08 | 159 |
|         | Rice  |          |                                          |          |     |
| Jejunum | straw | Negative | cell movement of neutrophils             | 3.03E-08 | 138 |
|         | Rice  |          |                                          |          |     |
| Jejunum | straw | Negative | development of leukocytes                | 3.03E-08 | 257 |
|         | Rice  |          |                                          |          |     |
| Jejunum | straw | Negative | neuronal cell death                      | 3.06E-08 | 294 |
|         | Rice  |          |                                          |          |     |
| Jejunum | straw | Negative | cellular degradation                     | 3.06E-08 | 120 |
|         | Rice  |          |                                          |          |     |
| Jejunum | straw | Negative | exocytosis                               | 3.38E-08 | 93  |
|         | Rice  |          |                                          |          |     |
| Jejunum | straw | Negative | uptake of monosaccharide                 | 3.63E-08 | 126 |
|         | Rice  |          |                                          |          |     |
| Jejunum | straw | Negative | morphology of nervous system             | 3.63E-08 | 334 |
| Jejunum | Rice  | Negative | growth of plasma membrane projections    | 3.94E-08 | 207 |

|         |       |          |                                              |          |     |
|---------|-------|----------|----------------------------------------------|----------|-----|
|         | straw |          |                                              |          |     |
|         | Rice  |          |                                              |          |     |
| Jejunum | straw | Negative | congenital anomaly of musculoskeletal system | 4.03E-08 | 315 |
|         | Rice  |          |                                              |          |     |
| Jejunum | straw | Negative | development of lymphatic system              | 4.06E-08 | 162 |
|         | Rice  |          |                                              |          |     |
| Jejunum | straw | Negative | abnormal morphology of abdomen               | 4.20E-08 | 370 |
|         | Rice  |          |                                              |          |     |
| Jejunum | straw | Negative | learning                                     | 4.35E-08 | 187 |
|         | Rice  |          |                                              |          |     |
| Jejunum | straw | Negative | formation of cells                           | 4.45E-08 | 411 |
|         | Rice  |          |                                              |          |     |
| Jejunum | straw | Negative | long-term potentiation                       | 4.68E-08 | 115 |
|         | Rice  |          |                                              |          |     |
| Jejunum | straw | Negative | chemotaxis of myeloid cells                  | 5.22E-08 | 135 |
|         | Rice  |          |                                              |          |     |
| Jejunum | straw | Negative | abnormal morphology of respiratory system    | 5.58E-08 | 141 |
|         | Rice  |          |                                              |          |     |
| Jejunum | straw | Negative | apoptosis of heart cells                     | 5.82E-08 | 92  |
|         | Rice  |          |                                              |          |     |
| Jejunum | straw | Negative | apoptosis of cardiomyocytes                  | 5.98E-08 | 90  |
|         | Rice  |          |                                              |          |     |
| Jejunum | straw | Negative | cellular infiltration by leukocytes          | 6.28E-08 | 174 |
|         | Rice  |          |                                              |          |     |
| Jejunum | straw | Negative | cell death of blood cells                    | 6.34E-08 | 297 |
|         | Rice  |          |                                              |          |     |
| Jejunum | straw | Negative | uptake of carbohydrate                       | 6.70E-08 | 134 |
|         | Rice  |          |                                              |          |     |
| Jejunum | straw | Negative | activation of blood cells                    | 7.14E-08 | 318 |
|         | Rice  |          |                                              |          |     |
| Jejunum | straw | Negative | cardiogenesis                                | 7.62E-08 | 208 |
|         | Rice  |          |                                              |          |     |
| Jejunum | straw | Negative | proliferation of hematopoietic cells         | 7.62E-08 | 119 |
|         | Rice  |          |                                              |          |     |
| Jejunum | straw | Negative | migration of connective tissue cells         | 8.02E-08 | 88  |
|         | Rice  |          |                                              |          |     |
| Jejunum | straw | Negative | cellular infiltration                        | 8.07E-08 | 194 |
|         | Rice  |          |                                              |          |     |
| Jejunum | straw | Negative | accumulation of lipid                        | 8.36E-08 | 137 |
|         | Rice  |          |                                              |          |     |
| Jejunum | straw | Negative | abnormal morphology of epithelial tissue     | 8.66E-08 | 186 |
|         | Rice  |          |                                              |          |     |
| Jejunum | straw | Negative | benign neoplasia                             | 8.66E-08 | 387 |
| Jejunum | Rice  | Negative | morphology of respiratory system             | 9.18E-08 | 142 |

|         |       |          |                                                 |          |      |  |
|---------|-------|----------|-------------------------------------------------|----------|------|--|
|         | straw |          |                                                 |          |      |  |
|         | Rice  |          |                                                 |          |      |  |
| Jejunum | straw | Negative | cell death of epithelial cell lines             | 1.01E-07 | 130  |  |
|         | Rice  |          |                                                 |          |      |  |
| Jejunum | straw | Negative | outgrowth of plasma membrane projections        | 1.04E-07 | 181  |  |
|         | Rice  |          |                                                 |          |      |  |
| Jejunum | straw | Negative | formation of actin filaments                    | 1.10E-07 | 139  |  |
|         | Rice  |          |                                                 |          |      |  |
| Jejunum | straw | Negative | cell death of heart cells                       | 1.12E-07 | 104  |  |
|         | Rice  |          |                                                 |          |      |  |
| Jejunum | straw | Negative | cognition                                       | 1.13E-07 | 200  |  |
|         | Rice  |          |                                                 |          |      |  |
| Jejunum | straw | Negative | growth of muscle tissue                         | 1.14E-07 | 167  |  |
|         | Rice  |          |                                                 |          |      |  |
| Jejunum | straw | Negative | proliferation of muscle cells                   | 1.22E-07 | 166  |  |
|         | Rice  |          |                                                 |          |      |  |
| Jejunum | straw | Negative | growth of neurites                              | 1.22E-07 | 203  |  |
|         | Rice  |          |                                                 |          |      |  |
| Jejunum | straw | Negative | cell death of heart                             | 1.25E-07 | 107  |  |
|         | Rice  |          |                                                 |          |      |  |
| Jejunum | straw | Negative | cell death of immune cells                      | 1.26E-07 | 282  |  |
|         | Rice  |          |                                                 |          |      |  |
| Jejunum | straw | Negative | seizure disorder                                | 1.32E-07 | 206  |  |
|         | Rice  |          |                                                 |          |      |  |
| Jejunum | straw | Negative | apoptosis of connective tissue cells            | 1.35E-07 | 135  |  |
|         | Rice  |          |                                                 |          |      |  |
| Jejunum | straw | Negative | infection by RNA virus                          | 1.35E-07 | 363  |  |
|         | Rice  |          |                                                 |          |      |  |
| Jejunum | straw | Negative | muscular hypertrophy                            | 1.38E-07 | 97   |  |
|         | Rice  |          |                                                 |          |      |  |
| Jejunum | straw | Negative | T cell development                              | 1.41E-07 | 219  |  |
|         | Rice  |          |                                                 |          |      |  |
| Jejunum | straw | Negative | quantity of T lymphocytes                       | 1.46E-07 | 232  |  |
|         | Rice  |          |                                                 |          |      |  |
| Jejunum | straw | Negative | proliferation of hematopoietic progenitor cells | 1.49E-07 | 113  |  |
|         | Rice  |          |                                                 |          |      |  |
| Jejunum | straw | Negative | development of cardiovascular tissue            | 1.50E-07 | 165  |  |
|         | Rice  |          |                                                 |          |      |  |
| Jejunum | straw | Negative | activation of leukocytes                        | 1.52E-07 | 297  |  |
|         | Rice  |          |                                                 |          |      |  |
| Jejunum | straw | Negative | cell death of cardiomyocytes                    | 1.52E-07 | 101  |  |
|         | Rice  |          |                                                 |          |      |  |
| Jejunum | straw | Negative | migration of endothelial cells                  | 1.54E-07 | 148  |  |
| Jejunum | Rice  | Negative | breast or colorectal cancer                     | 1.54E-07 | 1881 |  |

|         |       |          |                                       |          |     |
|---------|-------|----------|---------------------------------------|----------|-----|
|         | straw |          |                                       |          |     |
|         | Rice  |          |                                       |          |     |
| Jejunum | straw | Negative | morphology of heart ventricle         | 1.54E-07 | 92  |
|         | Rice  |          |                                       |          |     |
| Jejunum | straw | Negative | interphase                            | 1.56E-07 | 280 |
|         | Rice  |          |                                       |          |     |
| Jejunum | straw | Negative | cellular infiltration of cells        | 1.60E-07 | 176 |
|         | Rice  |          |                                       |          |     |
| Jejunum | straw | Negative | apoptosis of epithelial cell lines    | 1.62E-07 | 105 |
|         | Rice  |          |                                       |          |     |
| Jejunum | straw | Negative | development of lymphocytes            | 1.66E-07 | 239 |
|         | Rice  |          |                                       |          |     |
| Jejunum | straw | Negative | cell movement of granulocytes         | 1.72E-07 | 165 |
|         | Rice  |          |                                       |          |     |
| Jejunum | straw | Negative | migration of fibroblasts              | 1.77E-07 | 71  |
|         | Rice  |          |                                       |          |     |
| Jejunum | straw | Negative | morphology of vessel                  | 1.80E-07 | 139 |
|         | Rice  |          |                                       |          |     |
| Jejunum | straw | Negative | differentiation of muscle cell lines  | 1.85E-07 | 79  |
|         | Rice  |          |                                       |          |     |
| Jejunum | straw | Negative | survival of organism                  | 1.93E-07 | 298 |
|         | Rice  |          |                                       |          |     |
| Jejunum | straw | Negative | development of head                   | 2.00E-07 | 406 |
|         | Rice  |          |                                       |          |     |
| Jejunum | straw | Negative | generation of reactive oxygen species | 2.16E-07 | 97  |
|         | Rice  |          |                                       |          |     |
| Jejunum | straw | Negative | development of mononuclear leukocytes | 2.28E-07 | 240 |
|         | Rice  |          |                                       |          |     |
| Jejunum | straw | Negative | necrosis of cardiac muscle            | 2.28E-07 | 102 |
|         | Rice  |          |                                       |          |     |
| Jejunum | straw | Negative | homing of blood cells                 | 2.29E-07 | 168 |
|         | Rice  |          |                                       |          |     |
| Jejunum | straw | Negative | proliferation of embryonic cell lines | 2.47E-07 | 77  |
|         | Rice  |          |                                       |          |     |
| Jejunum | straw | Negative | demyelination                         | 2.47E-07 | 61  |
|         | Rice  |          |                                       |          |     |
| Jejunum | straw | Negative | quantity of metal                     | 2.51E-07 | 216 |
|         | Rice  |          |                                       |          |     |
| Jejunum | straw | Negative | synthesis of nitric oxide             | 2.55E-07 | 126 |
|         | Rice  |          |                                       |          |     |
| Jejunum | straw | Negative | outgrowth of neurites                 | 2.56E-07 | 178 |
|         | Rice  |          |                                       |          |     |
| Jejunum | straw | Negative | T cell homeostasis                    | 2.61E-07 | 223 |
| Jejunum | Rice  | Negative | function of phagocytes                | 2.71E-07 | 138 |

|         |       |          |                                           |          |     |
|---------|-------|----------|-------------------------------------------|----------|-----|
|         | straw |          |                                           |          |     |
|         | Rice  |          |                                           |          |     |
| Jejunum | straw | Negative | cell death of fibroblasts                 | 2.71E-07 | 121 |
|         | Rice  |          |                                           |          |     |
| Jejunum | straw | Negative | abnormal morphology of muscle             | 3.08E-07 | 142 |
|         | Rice  |          |                                           |          |     |
| Jejunum | straw | Negative | development of lymphatic system component | 3.08E-07 | 139 |
|         | Rice  |          |                                           |          |     |
| Jejunum | straw | Negative | function of myeloid cells                 | 3.11E-07 | 110 |
|         | Rice  |          |                                           |          |     |
| Jejunum | straw | Negative | synthesis of carbohydrate                 | 3.15E-07 | 186 |
|         | Rice  |          |                                           |          |     |
| Jejunum | straw | Negative | morphology of head                        | 3.18E-07 | 364 |
|         | Rice  |          |                                           |          |     |
| Jejunum | straw | Negative | infection by Retroviridae                 | 3.20E-07 | 303 |
|         | Rice  |          |                                           |          |     |
| Jejunum | straw | Negative | outgrowth of neurons                      | 3.20E-07 | 179 |
|         | Rice  |          |                                           |          |     |
| Jejunum | straw | Negative | shape change of tumor cell lines          | 3.22E-07 | 75  |
|         | Rice  |          |                                           |          |     |
| Jejunum | straw | Negative | homeostasis of leukocytes                 | 3.25E-07 | 238 |
|         | Rice  |          |                                           |          |     |
| Jejunum | straw | Negative | endothelial cell development              | 3.26E-07 | 157 |
|         | Rice  |          |                                           |          |     |
| Jejunum | straw | Negative | development of endothelial tissue         | 3.26E-07 | 162 |
|         | Rice  |          |                                           |          |     |
| Jejunum | straw | Negative | mass of organism                          | 3.26E-07 | 149 |
|         | Rice  |          |                                           |          |     |
| Jejunum | straw | Negative | Lymphocyte homeostasis                    | 3.30E-07 | 234 |
|         | Rice  |          |                                           |          |     |
| Jejunum | straw | Negative | abnormal morphology of nervous system     | 3.38E-07 | 305 |
|         | Rice  |          |                                           |          |     |
| Jejunum | straw | Negative | chemotaxis of phagocytes                  | 3.54E-07 | 133 |
|         | Rice  |          |                                           |          |     |
| Jejunum | straw | Negative | proliferation of mononuclear leukocytes   | 3.67E-07 | 310 |
|         | Rice  |          |                                           |          |     |
| Jejunum | straw | Negative | chemotaxis of leukocytes                  | 3.83E-07 | 157 |
|         | Rice  |          |                                           |          |     |
| Jejunum | straw | Negative | differentiation of epithelial tissue      | 3.96E-07 | 159 |
|         | Rice  |          |                                           |          |     |
| Jejunum | straw | Negative | recruitment of phagocytes                 | 3.97E-07 | 113 |
|         | Rice  |          |                                           |          |     |
| Jejunum | straw | Negative | morphology of lymphatic system component  | 4.00E-07 | 182 |
| Jejunum | Rice  | Negative | homing of leukocytes                      | 4.00E-07 | 166 |

|         |       |          |                                           |          |     |
|---------|-------|----------|-------------------------------------------|----------|-----|
|         | straw |          |                                           |          |     |
|         | Rice  |          |                                           |          |     |
| Jejunum | straw | Negative | formation of vascular lesion              | 4.05E-07 | 58  |
|         | Rice  |          |                                           |          |     |
| Jejunum | straw | Negative | seizures                                  | 4.05E-07 | 175 |
|         | Rice  |          |                                           |          |     |
| Jejunum | straw | Negative | apoptosis of muscle                       | 4.33E-07 | 119 |
|         | Rice  |          |                                           |          |     |
| Jejunum | straw | Negative | small GTPase mediated signal transduction | 4.48E-07 | 87  |
|         | Rice  |          |                                           |          |     |
| Jejunum | straw | Negative | formation of actin stress fibers          | 4.55E-07 | 110 |
|         | Rice  |          |                                           |          |     |
| Jejunum | straw | Negative | infection by lentivirus                   | 4.74E-07 | 300 |
|         | Rice  |          |                                           |          |     |
| Jejunum | straw | Negative | HIV infection                             | 5.10E-07 | 299 |
|         | Rice  |          |                                           |          |     |
| Jejunum | straw | Negative | fatty acid metabolism                     | 5.33E-07 | 255 |
|         | Rice  |          |                                           |          |     |
| Jejunum | straw | Negative | arthropathy                               | 5.33E-07 | 392 |
|         | Rice  |          |                                           |          |     |
| Jejunum | straw | Negative | differentiation of blood cells            | 5.39E-07 | 350 |
|         | Rice  |          |                                           |          |     |
| Jejunum | straw | Negative | apoptosis of muscle cells                 | 5.57E-07 | 118 |
|         | Rice  |          |                                           |          |     |
| Jejunum | straw | Negative | differentiation of bone                   | 5.64E-07 | 179 |
|         | Rice  |          |                                           |          |     |
| Jejunum | straw | Negative | apoptosis of pheochromocytoma cell lines  | 5.73E-07 | 48  |
|         | Rice  |          |                                           |          |     |
| Jejunum | straw | Negative | differentiation of leukocytes             | 5.78E-07 | 283 |
|         | Rice  |          |                                           |          |     |
| Jejunum | straw | Negative | size of embryo                            | 6.14E-07 | 157 |
|         | Rice  |          |                                           |          |     |
| Jejunum | straw | Negative | recruitment of leukocytes                 | 6.16E-07 | 144 |
|         | Rice  |          |                                           |          |     |
| Jejunum | straw | Negative | binding of DNA                            | 6.16E-07 | 223 |
|         | Rice  |          |                                           |          |     |
| Jejunum | straw | Negative | outgrowth of cells                        | 6.23E-07 | 188 |
|         | Rice  |          |                                           |          |     |
| Jejunum | straw | Negative | ion homeostasis of cells                  | 6.25E-07 | 237 |
|         | Rice  |          |                                           |          |     |
| Jejunum | straw | Negative | secretion of molecule                     | 6.35E-07 | 235 |
|         | Rice  |          |                                           |          |     |
| Jejunum | straw | Negative | recruitment of blood cells                | 6.36E-07 | 146 |
| Jejunum | Rice  | Negative | S phase                                   | 6.63E-07 | 118 |

|         |       |          |                                          |          |     |
|---------|-------|----------|------------------------------------------|----------|-----|
|         | straw |          |                                          |          |     |
|         | Rice  |          |                                          |          |     |
| Jejunum | straw | Negative | proliferation of lymphocytes             | 6.63E-07 | 304 |
|         | Rice  |          |                                          |          |     |
| Jejunum | straw | Negative | function of heart                        | 6.63E-07 | 106 |
|         | Rice  |          |                                          |          |     |
| Jejunum | straw | Negative | uterine serous papillary cancer          | 6.63E-07 | 106 |
|         | Rice  |          |                                          |          |     |
| Jejunum | straw | Negative | infection by HIV-1                       | 6.65E-07 | 258 |
|         | Rice  |          |                                          |          |     |
| Jejunum | straw | Negative | length of neurons                        | 6.68E-07 | 46  |
|         | Rice  |          |                                          |          |     |
| Jejunum | straw | Negative | development of body axis                 | 6.81E-07 | 429 |
|         | Rice  |          |                                          |          |     |
| Jejunum | straw | Negative | arthritis                                | 6.81E-07 | 385 |
|         | Rice  |          |                                          |          |     |
| Jejunum | straw | Negative | dysmyelination                           | 6.96E-07 | 66  |
|         | Rice  |          |                                          |          |     |
| Jejunum | straw | Negative | proliferation of embryonic cells         | 6.96E-07 | 113 |
|         | Rice  |          |                                          |          |     |
| Jejunum | straw | Negative | quantity of interleukin                  | 7.07E-07 | 68  |
|         | Rice  |          |                                          |          |     |
| Jejunum | straw | Negative | differentiation of bone cells            | 7.17E-07 | 177 |
|         | Rice  |          |                                          |          |     |
| Jejunum | straw | Negative | cell movement of muscle cells            | 7.44E-07 | 85  |
|         | Rice  |          |                                          |          |     |
| Jejunum | straw | Negative | cell movement of mononuclear leukocytes  | 7.44E-07 | 199 |
|         | Rice  |          |                                          |          |     |
| Jejunum | straw | Negative | quantity of antigen presenting cells     | 8.20E-07 | 124 |
|         | Rice  |          |                                          |          |     |
| Jejunum | straw | Negative | proliferation of epithelial cells        | 8.20E-07 | 211 |
|         | Rice  |          |                                          |          |     |
| Jejunum | straw | Negative | phosphorylation of L-amino acid          | 8.20E-07 | 101 |
|         | Rice  |          |                                          |          |     |
| Jejunum | straw | Negative | cell death of cervical cancer cell lines | 8.40E-07 | 154 |
|         | Rice  |          |                                          |          |     |
| Jejunum | straw | Negative | quantity of metal ion                    | 8.57E-07 | 191 |
|         | Rice  |          |                                          |          |     |
| Jejunum | straw | Negative | quantity of myeloid cells                | 8.61E-07 | 156 |
|         | Rice  |          |                                          |          |     |
| Jejunum | straw | Negative | quantity of carbohydrate                 | 8.74E-07 | 221 |
|         | Rice  |          |                                          |          |     |
| Jejunum | straw | Negative | hypertrophy of cells                     | 8.74E-07 | 129 |
| Jejunum | Rice  | Negative | metabolism of peptide                    | 8.88E-07 | 87  |



|         |       |          |                                         |          |     |
|---------|-------|----------|-----------------------------------------|----------|-----|
|         | straw |          |                                         |          |     |
|         | Rice  |          |                                         |          |     |
| Jejunum | straw | Negative | Organ Degeneration                      | 9.26E-07 | 211 |
|         | Rice  |          |                                         |          |     |
| Jejunum | straw | Negative | abnormal morphology of head             | 9.27E-07 | 344 |
|         | Rice  |          |                                         |          |     |
| Jejunum | straw | Negative | function of antigen presenting cells    | 9.27E-07 | 111 |
|         | Rice  |          |                                         |          |     |
| Jejunum | straw | Negative | heart rate                              | 9.75E-07 | 124 |
|         | Rice  |          |                                         |          |     |
| Jejunum | straw | Negative | abnormal morphology of digestive system | 1.03E-06 | 231 |
|         | Rice  |          |                                         |          |     |
| Jejunum | straw | Negative | formation of skin                       | 1.05E-06 | 160 |
|         | Rice  |          |                                         |          |     |
| Jejunum | straw | Negative | growth of lesion                        | 1.11E-06 | 330 |
|         | Rice  |          |                                         |          |     |
| Jejunum | straw | Negative | migration of muscle cells               | 1.13E-06 | 78  |
|         | Rice  |          |                                         |          |     |
| Jejunum | straw | Negative | cell death of endothelial cells         | 1.14E-06 | 93  |
|         | Rice  |          |                                         |          |     |
| Jejunum | straw | Negative | proliferation of smooth muscle cells    | 1.18E-06 | 127 |
|         | Rice  |          |                                         |          |     |
| Jejunum | straw | Negative | synthesis of DNA                        | 1.19E-06 | 180 |
|         | Rice  |          |                                         |          |     |
| Jejunum | straw | Negative | hypertrophy of heart                    | 1.23E-06 | 148 |
|         | Rice  |          |                                         |          |     |
| Jejunum | straw | Negative | size of cells                           | 1.29E-06 | 185 |
|         | Rice  |          |                                         |          |     |
| Jejunum | straw | Negative | growth of tumor                         | 1.30E-06 | 329 |
|         | Rice  |          |                                         |          |     |
| Jejunum | straw | Negative | hypertrophy of tissue                   | 1.35E-06 | 115 |
|         | Rice  |          |                                         |          |     |
| Jejunum | straw | Negative | quantity of cytokine                    | 1.44E-06 | 114 |
|         | Rice  |          |                                         |          |     |
| Jejunum | straw | Negative | hyperesthesia                           | 1.45E-06 | 57  |
|         | Rice  |          |                                         |          |     |
| Jejunum | straw | Negative | cell movement of smooth muscle cells    | 1.53E-06 | 76  |
|         | Rice  |          |                                         |          |     |
| Jejunum | straw | Negative | metabolism of monosaccharide            | 1.58E-06 | 60  |
|         | Rice  |          |                                         |          |     |
| Jejunum | straw | Negative | maturation of cells                     | 1.68E-06 | 195 |
|         | Rice  |          |                                         |          |     |
| Jejunum | straw | Negative | synthesis of phospholipid               | 1.70E-06 | 82  |
| Jejunum | Rice  | Negative | modification of peptide                 | 1.73E-06 | 53  |

|         |       |          |                                            |  |          |     |
|---------|-------|----------|--------------------------------------------|--|----------|-----|
|         | straw |          |                                            |  |          |     |
|         | Rice  |          |                                            |  |          |     |
| Jejunum | straw | Negative | Edema                                      |  | 1.76E-06 | 150 |
|         | Rice  |          |                                            |  |          |     |
| Jejunum | straw | Negative | hypersensitive reaction                    |  | 1.83E-06 | 184 |
|         | Rice  |          |                                            |  |          |     |
| Jejunum | straw | Negative | Bleeding                                   |  | 1.83E-06 | 182 |
|         | Rice  |          |                                            |  |          |     |
| Jejunum | straw | Negative | growth of embryonic tissue                 |  | 1.92E-06 | 122 |
|         | Rice  |          |                                            |  |          |     |
| Jejunum | straw | Negative | apoptosis of endothelial cells             |  | 1.96E-06 | 85  |
|         | Rice  |          |                                            |  |          |     |
| Jejunum | straw | Negative | autophagy                                  |  | 1.97E-06 | 162 |
|         | Rice  |          |                                            |  |          |     |
| Jejunum | straw | Negative | proliferation of epithelial cell lines     |  | 2.01E-06 | 104 |
|         | Rice  |          |                                            |  |          |     |
| Jejunum | straw | Negative | transport of carbohydrate                  |  | 2.13E-06 | 89  |
|         | Rice  |          |                                            |  |          |     |
| Jejunum | straw | Negative | attachment of cells                        |  | 2.27E-06 | 65  |
|         | Rice  |          |                                            |  |          |     |
| Jejunum | straw | Negative | metabolism of phospholipid                 |  | 2.36E-06 | 105 |
|         | Rice  |          |                                            |  |          |     |
| Jejunum | straw | Negative | quantity of IL-6 in blood                  |  | 2.80E-06 | 44  |
|         | Rice  |          |                                            |  |          |     |
| Jejunum | straw | Negative | proliferation of kidney cell lines         |  | 2.91E-06 | 81  |
|         | Rice  |          |                                            |  |          |     |
| Jejunum | straw | Negative | migration of smooth muscle cells           |  | 2.94E-06 | 70  |
|         | Rice  |          |                                            |  |          |     |
| Jejunum | straw | Negative | exocytosis by cells                        |  | 3.04E-06 | 61  |
|         | Rice  |          |                                            |  |          |     |
| Jejunum | straw | Negative | breast or ovarian cancer                   |  | 3.08E-06 | 746 |
|         | Rice  |          |                                            |  |          |     |
| Jejunum | straw | Negative | morphology of digestive system             |  | 3.15E-06 | 239 |
|         | Rice  |          |                                            |  |          |     |
| Jejunum | straw | Negative | cell death of central nervous system cells |  | 3.28E-06 | 128 |
|         | Rice  |          |                                            |  |          |     |
| Jejunum | straw | Negative | morphology of bone                         |  | 3.37E-06 | 191 |
|         | Rice  |          |                                            |  |          |     |
| Jejunum | straw | Negative | cell death of liver cells                  |  | 3.40E-06 | 89  |
|         | Rice  |          |                                            |  |          |     |
| Jejunum | straw | Negative | skin abnormality                           |  | 3.42E-06 | 102 |
|         | Rice  |          |                                            |  |          |     |
| Jejunum | straw | Negative | morphology of blood vessel                 |  | 3.52E-06 | 124 |
| Jejunum | Rice  | Negative | organization of filaments                  |  | 3.52E-06 | 93  |

|         |       |          |                                           |          |     |
|---------|-------|----------|-------------------------------------------|----------|-----|
|         | straw |          |                                           |          |     |
|         | Rice  |          |                                           |          |     |
| Jejunum | straw | Negative | connective or soft tissue tumor           | 3.64E-06 | 291 |
|         | Rice  |          |                                           |          |     |
| Jejunum | straw | Negative | congenital malformation of skeleton       | 3.70E-06 | 180 |
|         | Rice  |          |                                           |          |     |
| Jejunum | straw | Negative | apoptosis of epithelial cells             | 3.95E-06 | 125 |
|         | Rice  |          |                                           |          |     |
| Jejunum | straw | Negative | cell death of pheochromocytoma cell lines | 3.97E-06 | 58  |
|         | Rice  |          |                                           |          |     |
| Jejunum | straw | Negative | quantity of muscle                        | 4.10E-06 | 62  |
|         | Rice  |          |                                           |          |     |
| Jejunum | straw | Negative | cytostasis                                | 4.20E-06 | 124 |
|         | Rice  |          |                                           |          |     |
| Jejunum | straw | Negative | development of digestive system           | 4.21E-06 | 164 |
|         | Rice  |          |                                           |          |     |
| Jejunum | straw | Negative | production of reactive oxygen species     | 4.41E-06 | 157 |
|         | Rice  |          |                                           |          |     |
| Jejunum | straw | Negative | perinatal death                           | 4.98E-06 | 247 |
|         | Rice  |          |                                           |          |     |
| Jejunum | straw | Negative | potentiation of synapse                   | 5.04E-06 | 70  |
|         | Rice  |          |                                           |          |     |
| Jejunum | straw | Negative | atrophy of muscle                         | 5.13E-06 | 69  |
|         | Rice  |          |                                           |          |     |
| Jejunum | straw | Negative | cell spreading of fibroblast cell lines   | 5.19E-06 | 31  |
|         | Rice  |          |                                           |          |     |
| Jejunum | straw | Negative | activation of Protein kinase              | 5.47E-06 | 111 |
|         | Rice  |          |                                           |          |     |
| Jejunum | straw | Negative | concentration of phosphatidic acid        | 5.47E-06 | 64  |
|         | Rice  |          |                                           |          |     |
| Jejunum | straw | Negative | cell viability of connective tissue cells | 5.49E-06 | 63  |
|         | Rice  |          |                                           |          |     |
| Jejunum | straw | Negative | concentration of fatty acid               | 5.69E-06 | 122 |
|         | Rice  |          |                                           |          |     |
| Jejunum | straw | Negative | contraction of heart                      | 5.69E-06 | 82  |
|         | Rice  |          |                                           |          |     |
| Jejunum | straw | Negative | neovascularization                        | 5.69E-06 | 75  |
|         | Rice  |          |                                           |          |     |
| Jejunum | straw | Negative | concentration of acylglycerol             | 5.83E-06 | 144 |
|         | Rice  |          |                                           |          |     |
| Jejunum | straw | Negative | quantity of Ca <sup>2+</sup>              | 6.04E-06 | 173 |
|         | Rice  |          |                                           |          |     |
| Jejunum | straw | Negative | Rheumatic Disease                         | 6.05E-06 | 432 |
| Jejunum | Rice  | Negative | abnormal morphology of heart ventricle    | 6.10E-06 | 80  |

|         |       |          |                                         |          |     |
|---------|-------|----------|-----------------------------------------|----------|-----|
|         | straw |          |                                         |          |     |
|         | Rice  |          |                                         |          |     |
| Jejunum | straw | Negative | morphology of cardiovascular tissue     | 6.10E-06 | 44  |
|         | Rice  |          |                                         |          |     |
| Jejunum | straw | Negative | female genital tract serous cancer      | 6.46E-06 | 164 |
|         | Rice  |          |                                         |          |     |
| Jejunum | straw | Negative | formation of eye                        | 6.60E-06 | 185 |
|         | Rice  |          |                                         |          |     |
| Jejunum | straw | Negative | long-term potentiation of synapse       | 6.60E-06 | 69  |
|         | Rice  |          |                                         |          |     |
| Jejunum | straw | Negative | dilation of heart ventricle             | 6.80E-06 | 30  |
|         | Rice  |          |                                         |          |     |
| Jejunum | straw | Negative | concentration of phospholipid           | 6.81E-06 | 83  |
|         | Rice  |          |                                         |          |     |
| Jejunum | straw | Negative | midline defect                          | 6.85E-06 | 116 |
|         | Rice  |          |                                         |          |     |
| Jejunum | straw | Negative | activation of enzyme                    | 6.88E-06 | 165 |
|         | Rice  |          |                                         |          |     |
| Jejunum | straw | Negative | quantity of muscle cells                | 7.11E-06 | 56  |
|         | Rice  |          |                                         |          |     |
| Jejunum | straw | Negative | function of macrophages                 | 7.37E-06 | 81  |
|         | Rice  |          |                                         |          |     |
| Jejunum | straw | Negative | sprouting                               | 7.37E-06 | 164 |
|         | Rice  |          |                                         |          |     |
| Jejunum | straw | Negative | serine phosphorylation                  | 7.41E-06 | 47  |
|         | Rice  |          |                                         |          |     |
| Jejunum | straw | Negative | apoptosis of liver                      | 7.62E-06 | 73  |
|         | Rice  |          |                                         |          |     |
| Jejunum | straw | Negative | proliferation of lymphatic system cells | 7.62E-06 | 90  |
|         | Rice  |          |                                         |          |     |
| Jejunum | straw | Negative | differentiation of epithelial cells     | 7.65E-06 | 135 |
|         | Rice  |          |                                         |          |     |
| Jejunum | straw | Negative | I-kappaB kinase/NF-kappaB cascade       | 7.90E-06 | 79  |
|         | Rice  |          |                                         |          |     |
| Jejunum | straw | Negative | apoptosis of blood cells                | 8.00E-06 | 207 |
|         | Rice  |          |                                         |          |     |
| Jejunum | straw | Negative | catabolism of protein                   | 8.07E-06 | 249 |
|         | Rice  |          |                                         |          |     |
| Jejunum | straw | Negative | cell movement of macrophages            | 8.07E-06 | 116 |
|         | Rice  |          |                                         |          |     |
| Jejunum | straw | Negative | quantity of granulocytes                | 8.35E-06 | 136 |
|         | Rice  |          |                                         |          |     |
| Jejunum | straw | Negative | cell death of tumor                     | 8.35E-06 | 162 |
| Jejunum | Rice  | Negative | morphology of lymphoid organ            | 8.35E-06 | 166 |

|         |       |          |                                         |          |      |
|---------|-------|----------|-----------------------------------------|----------|------|
|         | straw |          |                                         |          |      |
|         | Rice  |          |                                         |          |      |
| Jejunum | straw | Negative | function of endothelial cells           | 8.43E-06 | 27   |
|         | Rice  |          |                                         |          |      |
| Jejunum | straw | Negative | hepatocellular carcinoma                | 8.55E-06 | 1574 |
|         | Rice  |          |                                         |          |      |
| Jejunum | straw | Negative | adhesion of immune cells                | 8.58E-06 | 149  |
|         | Rice  |          |                                         |          |      |
| Jejunum | straw | Negative | morphogenesis of neurons                | 8.58E-06 | 179  |
|         | Rice  |          |                                         |          |      |
| Jejunum | straw | Negative | movement of vascular endothelial cells  | 8.67E-06 | 82   |
|         | Rice  |          |                                         |          |      |
| Jejunum | straw | Negative | allodynia                               | 8.70E-06 | 29   |
|         | Rice  |          |                                         |          |      |
| Jejunum | straw | Negative | function of endothelial tissue          | 8.70E-06 | 29   |
|         | Rice  |          |                                         |          |      |
| Jejunum | straw | Negative | branching of cells                      | 8.77E-06 | 157  |
|         | Rice  |          |                                         |          |      |
| Jejunum | straw | Negative | peripheral arterial disease             | 9.23E-06 | 94   |
|         | Rice  |          |                                         |          |      |
| Jejunum | straw | Negative | synthesis of fatty acid                 | 9.40E-06 | 134  |
|         | Rice  |          |                                         |          |      |
| Jejunum | straw | Negative | mammary tumor                           | 9.66E-06 | 640  |
|         | Rice  |          |                                         |          |      |
| Jejunum | straw | Negative | formation of lymphatic system component | 9.83E-06 | 126  |
|         | Rice  |          |                                         |          |      |
| Jejunum | straw | Negative | quantity of steroid                     | 9.90E-06 | 195  |
|         | Rice  |          |                                         |          |      |
| Jejunum | straw | Negative | necrosis of tumor                       | 1.01E-05 | 161  |
|         | Rice  |          |                                         |          |      |
| Jejunum | straw | Negative | memory                                  | 1.01E-05 | 112  |
|         | Rice  |          |                                         |          |      |
| Jejunum | straw | Negative | differentiation of muscle               | 1.04E-05 | 130  |
|         | Rice  |          |                                         |          |      |
| Jejunum | straw | Negative | abnormal morphology of lymphoid organ   | 1.09E-05 | 160  |
|         | Rice  |          |                                         |          |      |
| Jejunum | straw | Negative | craniofacial abnormality                | 1.16E-05 | 151  |
|         | Rice  |          |                                         |          |      |
| Jejunum | straw | Negative | proliferation of tumor cells            | 1.18E-05 | 196  |
|         | Rice  |          |                                         |          |      |
| Jejunum | straw | Negative | recruitment of macrophages              | 1.19E-05 | 51   |
|         | Rice  |          |                                         |          |      |
| Jejunum | straw | Negative | engulfment of leukocytes                | 1.22E-05 | 73   |
| Jejunum | Rice  | Negative | neovascularization of organ             | 1.24E-05 | 53   |

|         |       |          |                                              |          |     |
|---------|-------|----------|----------------------------------------------|----------|-----|
|         | straw |          |                                              |          |     |
|         | Rice  |          |                                              |          |     |
| Jejunum | straw | Negative | immune response of cells                     | 1.27E-05 | 236 |
|         | Rice  |          |                                              |          |     |
| Jejunum | straw | Negative | recruitment of antigen presenting cells      | 1.27E-05 | 57  |
|         | Rice  |          |                                              |          |     |
| Jejunum | straw | Negative | paraproteinemia                              | 1.28E-05 | 143 |
|         | Rice  |          |                                              |          |     |
| Jejunum | straw | Negative | formation of lung                            | 1.31E-05 | 129 |
|         | Rice  |          |                                              |          |     |
| Jejunum | straw | Negative | engulfment of blood cells                    | 1.33E-05 | 77  |
|         | Rice  |          |                                              |          |     |
| Jejunum | straw | Negative | uptake of D-hexose                           | 1.33E-05 | 98  |
|         | Rice  |          |                                              |          |     |
| Jejunum | straw | Negative | adhesion of blood cells                      | 1.33E-05 | 159 |
|         | Rice  |          |                                              |          |     |
| Jejunum | straw | Negative | cell viability of cervical cancer cell lines | 1.41E-05 | 97  |
|         | Rice  |          |                                              |          |     |
| Jejunum | straw | Negative | uptake of D-glucose                          | 1.41E-05 | 97  |
|         | Rice  |          |                                              |          |     |
| Jejunum | straw | Negative | dilation of heart chamber                    | 1.41E-05 | 31  |
|         | Rice  |          |                                              |          |     |
| Jejunum | straw | Negative | formation of filopodia                       | 1.42E-05 | 75  |
|         | Rice  |          |                                              |          |     |
| Jejunum | straw | Negative | size of animal                               | 1.46E-05 | 80  |
|         | Rice  |          |                                              |          |     |
| Jejunum | straw | Negative | apoptosis of neurons                         | 1.48E-05 | 182 |
|         | Rice  |          |                                              |          |     |
| Jejunum | straw | Negative | morphology of lymph node                     | 1.53E-05 | 73  |
|         | Rice  |          |                                              |          |     |
| Jejunum | straw | Negative | release of metal                             | 1.57E-05 | 95  |
|         | Rice  |          |                                              |          |     |
| Jejunum | straw | Negative | length of plasma membrane projections        | 1.57E-05 | 42  |
|         | Rice  |          |                                              |          |     |
| Jejunum | straw | Negative | serine phosphorylation of peptide            | 1.57E-05 | 42  |
|         | Rice  |          |                                              |          |     |
| Jejunum | straw | Negative | transport of monosaccharide                  | 1.58E-05 | 72  |
|         | Rice  |          |                                              |          |     |
| Jejunum | straw | Negative | transport of amino acids                     | 1.59E-05 | 62  |
|         | Rice  |          |                                              |          |     |
| Jejunum | straw | Negative | quantity of protein in blood                 | 1.60E-05 | 210 |
|         | Rice  |          |                                              |          |     |
| Jejunum | straw | Negative | peripheral vascular disease                  | 1.62E-05 | 160 |
| Jejunum | Rice  | Negative | apoptosis of liver cells                     | 1.62E-05 | 71  |

|         |       |          |                                         |          |      |
|---------|-------|----------|-----------------------------------------|----------|------|
|         | straw |          |                                         |          |      |
|         | Rice  |          |                                         |          |      |
| Jejunum | straw | Negative | cell death of liver                     | 1.62E-05 | 104  |
|         | Rice  |          |                                         |          |      |
| Jejunum | straw | Negative | abnormal morphology of bone             | 1.66E-05 | 182  |
|         | Rice  |          |                                         |          |      |
| Jejunum | straw | Negative | Thrombosis                              | 1.71E-05 | 76   |
|         | Rice  |          |                                         |          |      |
| Jejunum | straw | Negative | inflammation of central nervous system  | 1.76E-05 | 129  |
|         | Rice  |          |                                         |          |      |
| Jejunum | straw | Negative | smooth muscle tumor                     | 1.76E-05 | 129  |
|         | Rice  |          |                                         |          |      |
| Jejunum | straw | Negative | quantity of macrophages                 | 1.76E-05 | 89   |
|         | Rice  |          |                                         |          |      |
| Jejunum | straw | Negative | plasma cell dyscrasia                   | 1.80E-05 | 142  |
|         | Rice  |          |                                         |          |      |
| Jejunum | straw | Negative | cell death of sarcoma cell lines        | 1.81E-05 | 99   |
|         | Rice  |          |                                         |          |      |
| Jejunum | straw | Negative | adenocarcinoma                          | 1.89E-05 | 2405 |
|         | Rice  |          |                                         |          |      |
| Jejunum | straw | Negative | experimentally-induced diabetes         | 1.92E-05 | 46   |
|         | Rice  |          |                                         |          |      |
| Jejunum | straw | Negative | differentiation of tumor cell lines     | 1.98E-05 | 159  |
|         | Rice  |          |                                         |          |      |
| Jejunum | straw | Negative | MAPKKK cascade                          | 2.04E-05 | 90   |
|         | Rice  |          |                                         |          |      |
| Jejunum | straw | Negative | proliferation of T lymphocytes          | 2.06E-05 | 247  |
|         | Rice  |          |                                         |          |      |
| Jejunum | straw | Negative | hypertrophy of cardiac muscle           | 2.06E-05 | 71   |
|         | Rice  |          |                                         |          |      |
| Jejunum | straw | Negative | necrosis of liver                       | 2.06E-05 | 103  |
|         | Rice  |          |                                         |          |      |
| Jejunum | straw | Negative | morphology of endothelial tissue        | 2.10E-05 | 41   |
|         | Rice  |          |                                         |          |      |
| Jejunum | straw | Negative | abnormal morphology of embryonic tissue | 2.13E-05 | 225  |
|         | Rice  |          |                                         |          |      |
| Jejunum | straw | Negative | growth of lymphatic system component    | 2.15E-05 | 85   |
|         | Rice  |          |                                         |          |      |
| Jejunum | straw | Negative | angiogenesis of lesion                  | 2.15E-05 | 59   |
|         | Rice  |          |                                         |          |      |
| Jejunum | straw | Negative | cell spreading of tumor cell lines      | 2.16E-05 | 51   |
|         | Rice  |          |                                         |          |      |
| Jejunum | straw | Negative | apoptosis of neuroblastoma cell lines   | 2.19E-05 | 57   |
| Jejunum | Rice  | Negative | cell movement of lymphocytes            | 2.19E-05 | 165  |

|         |       |          |                                               |          |      |
|---------|-------|----------|-----------------------------------------------|----------|------|
|         | straw |          |                                               |          |      |
|         | Rice  |          |                                               |          |      |
| Jejunum | straw | Negative | angiogenesis of tumor                         | 2.19E-05 | 56   |
|         | Rice  |          |                                               |          |      |
| Jejunum | straw | Negative | epileptic seizure                             | 2.19E-05 | 75   |
|         | Rice  |          |                                               |          |      |
| Jejunum | straw | Negative | remodeling of bone                            | 2.24E-05 | 84   |
|         | Rice  |          |                                               |          |      |
| Jejunum | straw | Negative | apoptosis of fibroblasts                      | 2.24E-05 | 95   |
|         | Rice  |          |                                               |          |      |
| Jejunum | straw | Negative | invasion of carcinoma cell lines              | 2.36E-05 | 87   |
|         | Rice  |          |                                               |          |      |
| Jejunum | straw | Negative | morphology of blood cells                     | 2.38E-05 | 173  |
|         | Rice  |          |                                               |          |      |
| Jejunum | straw | Negative | cell death of brain                           | 2.41E-05 | 124  |
|         | Rice  |          |                                               |          |      |
| Jejunum | straw | Negative | liver cancer                                  | 2.50E-05 | 1617 |
|         | Rice  |          |                                               |          |      |
| Jejunum | straw | Negative | blood protein disorder                        | 2.57E-05 | 157  |
|         | Rice  |          |                                               |          |      |
| Jejunum | straw | Negative | mass of heart                                 | 2.65E-05 | 62   |
|         | Rice  |          |                                               |          |      |
| Jejunum | straw | Negative | contractility of myocardium                   | 2.68E-05 | 32   |
|         | Rice  |          |                                               |          |      |
| Jejunum | straw | Negative | degranulation                                 | 2.75E-05 | 98   |
|         | Rice  |          |                                               |          |      |
| Jejunum | straw | Negative | cell death of B-lymphocyte derived cell lines | 2.81E-05 | 59   |
|         | Rice  |          |                                               |          |      |
| Jejunum | straw | Negative | differentiation of embryonic tissue           | 2.84E-05 | 109  |
|         | Rice  |          |                                               |          |      |
| Jejunum | straw | Negative | resorption of bone                            | 2.87E-05 | 74   |
|         | Rice  |          |                                               |          |      |
| Jejunum | straw | Negative | hepatobiliary system cancer                   | 2.97E-05 | 1623 |
|         | Rice  |          |                                               |          |      |
| Jejunum | straw | Negative | abdominal adenocarcinoma                      | 3.00E-05 | 2188 |
|         | Rice  |          |                                               |          |      |
| Jejunum | straw | Negative | contractility of heart                        | 3.00E-05 | 78   |
|         | Rice  |          |                                               |          |      |
| Jejunum | straw | Negative | Encephalitis                                  | 3.09E-05 | 125  |
|         | Rice  |          |                                               |          |      |
| Jejunum | straw | Negative | differentiation of T lymphocytes              | 3.12E-05 | 158  |
|         | Rice  |          |                                               |          |      |
| Jejunum | straw | Negative | serous neoplasm                               | 3.13E-05 | 248  |
| Jejunum | Rice  | Negative | liver tumor                                   | 3.15E-05 | 1626 |



|         |       |          |                                           |          |      |
|---------|-------|----------|-------------------------------------------|----------|------|
|         | straw |          |                                           |          |      |
|         | Rice  |          |                                           |          |      |
| Jejunum | straw | Negative | muscle tumor                              | 3.41E-05 | 151  |
|         | Rice  |          |                                           |          |      |
| Jejunum | straw | Negative | colon cancer                              | 3.48E-05 | 1389 |
|         | Rice  |          |                                           |          |      |
| Jejunum | straw | Negative | degranulation of cells                    | 3.51E-05 | 97   |
|         | Rice  |          |                                           |          |      |
| Jejunum | straw | Negative | formation of muscle cells                 | 3.55E-05 | 79   |
|         | Rice  |          |                                           |          |      |
| Jejunum | straw | Negative | differentiation of osteoblasts            | 3.60E-05 | 118  |
|         | Rice  |          |                                           |          |      |
| Jejunum | straw | Negative | abnormal morphology of blood vessel       | 3.61E-05 | 113  |
|         | Rice  |          |                                           |          |      |
| Jejunum | straw | Negative | abnormal morphology of lymph node         | 3.62E-05 | 68   |
|         | Rice  |          |                                           |          |      |
| Jejunum | straw | Negative | proliferation of endothelial cells        | 3.76E-05 | 131  |
|         | Rice  |          |                                           |          |      |
| Jejunum | straw | Negative | permeability of cells                     | 3.76E-05 | 47   |
|         | Rice  |          |                                           |          |      |
| Jejunum | straw | Negative | atherogenesis                             | 3.80E-05 | 39   |
|         | Rice  |          |                                           |          |      |
| Jejunum | straw | Negative | hyperplasia of tissue                     | 3.92E-05 | 85   |
|         | Rice  |          |                                           |          |      |
| Jejunum | straw | Negative | morphogenesis of neurites                 | 3.92E-05 | 173  |
|         | Rice  |          |                                           |          |      |
| Jejunum | straw | Negative | leiomyomatosis                            | 4.03E-05 | 121  |
|         | Rice  |          |                                           |          |      |
| Jejunum | straw | Negative | function of blood vessel                  | 4.03E-05 | 29   |
|         | Rice  |          |                                           |          |      |
| Jejunum | straw | Negative | release of L-amino acid                   | 4.03E-05 | 40   |
|         | Rice  |          |                                           |          |      |
| Jejunum | straw | Negative | apoptosis of leukocytes                   | 4.03E-05 | 188  |
|         | Rice  |          |                                           |          |      |
| Jejunum | straw | Negative | quantity of cellular protrusions          | 4.04E-05 | 71   |
|         | Rice  |          |                                           |          |      |
| Jejunum | straw | Negative | polymerization of protein                 | 4.08E-05 | 154  |
|         | Rice  |          |                                           |          |      |
| Jejunum | straw | Negative | engulfment of myeloid cells               | 4.11E-05 | 64   |
|         | Rice  |          |                                           |          |      |
| Jejunum | straw | Negative | endocytosis                               | 4.15E-05 | 144  |
|         | Rice  |          |                                           |          |      |
| Jejunum | straw | Negative | release of Ca <sup>2+</sup>               | 4.34E-05 | 90   |
| Jejunum | Rice  | Negative | cell movement of breast cancer cell lines | 4.35E-05 | 122  |

|         |        |          |                                             |          |      |
|---------|--------|----------|---------------------------------------------|----------|------|
|         | straw  |          |                                             |          |      |
|         | Rice   |          |                                             |          |      |
| Jejunum | straw  | Negative | replication of Influenza virus              | 4.35E-05 | 122  |
|         | Rice   |          |                                             |          |      |
| Jejunum | straw  | Negative | degranulation of phagocytes                 | 4.36E-05 | 69   |
|         | Rice   |          |                                             |          |      |
| Jejunum | straw  | Negative | chemotaxis of neutrophils                   | 4.41E-05 | 74   |
|         | Rice   |          |                                             |          |      |
| Jejunum | straw  | Negative | differentiation of muscle cells             | 4.55E-05 | 119  |
|         | Rice   |          |                                             |          |      |
| Jejunum | straw  | Negative | proliferation of prostate cancer cell lines | 4.55E-05 | 128  |
|         | Rice   |          |                                             |          |      |
| Jejunum | straw  | Negative | recruitment of neutrophils                  | 4.79E-05 | 81   |
|         | Corn   |          |                                             |          |      |
| Jejunum | stover | Positive | proliferation of cells                      | 3.57E-33 | 1344 |
|         | Corn   |          |                                             |          |      |
| Jejunum | stover | Positive | cancer                                      | 3.57E-33 | 3430 |
|         | Corn   |          |                                             |          |      |
| Jejunum | stover | Positive | malignant solid tumor                       | 1.00E-30 | 3383 |
|         | Corn   |          |                                             |          |      |
| Jejunum | stover | Positive | cell death                                  | 3.08E-28 | 1208 |
|         | Corn   |          |                                             |          |      |
| Jejunum | stover | Positive | necrosis                                    | 7.59E-27 | 960  |
|         | Corn   |          |                                             |          |      |
| Jejunum | stover | Positive | organismal death                            | 4.15E-25 | 895  |
|         | Corn   |          |                                             |          |      |
| Jejunum | stover | Positive | morbidity or mortality                      | 4.48E-25 | 905  |
|         | Corn   |          |                                             |          |      |
| Jejunum | stover | Positive | apoptosis                                   | 3.51E-24 | 969  |
|         | Corn   |          |                                             |          |      |
| Jejunum | stover | Positive | morphology of cells                         | 3.78E-24 | 745  |
|         | Corn   |          |                                             |          |      |
| Jejunum | stover | Positive | cell movement                               | 8.24E-23 | 798  |
|         | Corn   |          |                                             |          |      |
| Jejunum | stover | Positive | organization of cytoplasm                   | 5.11E-19 | 587  |
|         | Corn   |          |                                             |          |      |
| Jejunum | stover | Positive | migration of cells                          | 1.05E-18 | 706  |
|         | Corn   |          |                                             |          |      |
| Jejunum | stover | Positive | cellular homeostasis                        | 2.75E-18 | 580  |
|         | Corn   |          |                                             |          |      |
| Jejunum | stover | Positive | expression of RNA                           | 1.38E-17 | 778  |
|         | Corn   |          |                                             |          |      |
| Jejunum | stover | Positive | epithelial cancer                           | 7.48E-17 | 2760 |
| Jejunum | Corn   | Positive | quantity of cells                           | 7.61E-17 | 653  |

|         |        |          |                                              |          |      |
|---------|--------|----------|----------------------------------------------|----------|------|
|         | stover |          |                                              |          |      |
|         | Corn   |          |                                              |          |      |
| Jejunum | stover | Positive | transcription                                | 9.30E-17 | 725  |
|         | Corn   |          |                                              |          |      |
| Jejunum | stover | Positive | neoplasia of epithelial tissue               | 1.36E-16 | 2782 |
|         | Corn   |          |                                              |          |      |
| Jejunum | stover | Positive | transcription of RNA                         | 2.15E-16 | 679  |
|         | Corn   |          |                                              |          |      |
| Jejunum | stover | Positive | tumorigenesis of tissue                      | 2.15E-16 | 2823 |
|         | Corn   |          |                                              |          |      |
| Jejunum | stover | Positive | cell death of tumor cell lines               | 2.17E-15 | 567  |
|         | Corn   |          |                                              |          |      |
| Jejunum | stover | Positive | organization of cytoskeleton                 | 2.51E-15 | 524  |
|         | Corn   |          |                                              |          |      |
| Jejunum | stover | Positive | cell survival                                | 2.81E-15 | 523  |
|         | Corn   |          |                                              |          |      |
| Jejunum | stover | Positive | cell death of connective tissue cells        | 3.46E-15 | 254  |
|         | Corn   |          |                                              |          |      |
| Jejunum | stover | Positive | differentiation of cells                     | 6.47E-15 | 795  |
|         | Corn   |          |                                              |          |      |
| Jejunum | stover | Positive | angiogenesis                                 | 8.85E-15 | 359  |
|         | Corn   |          |                                              |          |      |
| Jejunum | stover | Positive | transport of molecule                        | 9.87E-15 | 591  |
|         | Corn   |          |                                              |          |      |
| Jejunum | stover | Positive | morphology of cardiovascular system          | 1.26E-14 | 258  |
|         | Corn   |          |                                              |          |      |
| Jejunum | stover | Positive | size of body                                 | 2.30E-14 | 338  |
|         | Corn   |          |                                              |          |      |
| Jejunum | stover | Positive | vasculogenesis                               | 1.04E-13 | 296  |
|         | Corn   |          |                                              |          |      |
| Jejunum | stover | Positive | Viral Infection                              | 1.40E-13 | 585  |
|         | Corn   |          |                                              |          |      |
| Jejunum | stover | Positive | cell viability                               | 2.41E-13 | 483  |
|         | Corn   |          |                                              |          |      |
| Jejunum | stover | Positive | abdominal neoplasm                           | 2.79E-13 | 2737 |
|         | Corn   |          |                                              |          |      |
| Jejunum | stover | Positive | abnormal morphology of cells                 | 2.99E-13 | 471  |
|         | Corn   |          |                                              |          |      |
| Jejunum | stover | Positive | microtubule dynamics                         | 1.52E-12 | 441  |
|         | Corn   |          |                                              |          |      |
| Jejunum | stover | Positive | abnormal morphology of cardiovascular system | 1.64E-12 | 232  |
|         | Corn   |          |                                              |          |      |
| Jejunum | stover | Positive | apoptosis of tumor cell lines                | 3.55E-12 | 448  |
| Jejunum | Corn   | Positive | cell movement of tumor cell lines            | 3.55E-12 | 329  |

|         |        |          |                                        |          |      |
|---------|--------|----------|----------------------------------------|----------|------|
|         | stover |          |                                        |          |      |
|         | Corn   |          |                                        |          |      |
| Jejunum | stover | Positive | abdominal cancer                       | 3.64E-12 | 2698 |
|         | Corn   |          |                                        |          |      |
| Jejunum | stover | Positive | digestive organ tumor                  | 3.97E-12 | 2374 |
|         | Corn   |          |                                        |          |      |
| Jejunum | stover | Positive | abnormal morphology of thoracic cavity | 4.53E-12 | 237  |
|         | Corn   |          |                                        |          |      |
| Jejunum | stover | Positive | cell death of epithelial cells         | 4.98E-12 | 205  |
|         | Corn   |          |                                        |          |      |
| Jejunum | stover | Positive | transcription of DNA                   | 5.94E-12 | 551  |
|         | Corn   |          |                                        |          |      |
| Jejunum | stover | Positive | digestive system cancer                | 6.70E-12 | 2351 |
|         | Corn   |          |                                        |          |      |
| Jejunum | stover | Positive | necrosis of epithelial tissue          | 6.70E-12 | 237  |
|         | Corn   |          |                                        |          |      |
| Jejunum | stover | Positive | quantity of blood cells                | 2.05E-11 | 384  |
|         | Corn   |          |                                        |          |      |
| Jejunum | stover | Positive | morphology of heart                    | 2.23E-11 | 170  |
|         | Corn   |          |                                        |          |      |
| Jejunum | stover | Positive | concentration of lipid                 | 2.93E-11 | 311  |
|         | Corn   |          |                                        |          |      |
| Jejunum | stover | Positive | organization of organelle              | 3.46E-11 | 217  |
|         | Corn   |          |                                        |          |      |
| Jejunum | stover | Positive | quantity of connective tissue          | 3.83E-11 | 239  |
|         | Corn   |          |                                        |          |      |
| Jejunum | stover | Positive | morphology of body cavity              | 3.83E-11 | 437  |
|         | Corn   |          |                                        |          |      |
| Jejunum | stover | Positive | abnormal morphology of body cavity     | 5.75E-11 | 419  |
|         | Corn   |          |                                        |          |      |
| Jejunum | stover | Positive | development of vasculature             | 6.79E-11 | 173  |
|         | Corn   |          |                                        |          |      |
| Jejunum | stover | Positive | protein kinase cascade                 | 6.80E-11 | 174  |
|         | Corn   |          |                                        |          |      |
| Jejunum | stover | Positive | quantity of leukocytes                 | 8.17E-11 | 344  |
|         | Corn   |          |                                        |          |      |
| Jejunum | stover | Positive | transactivation                        | 8.42E-11 | 229  |
|         | Corn   |          |                                        |          |      |
| Jejunum | stover | Positive | Growth Failure                         | 1.63E-10 | 235  |
|         | Corn   |          |                                        |          |      |
| Jejunum | stover | Positive | abnormal morphology of heart           | 1.72E-10 | 159  |
|         | Corn   |          |                                        |          |      |
| Jejunum | stover | Positive | colony formation of cells              | 5.00E-10 | 196  |
| Jejunum | Corn   | Positive | growth of organism                     | 7.07E-10 | 313  |

|         |        |          |                                            |          |     |
|---------|--------|----------|--------------------------------------------|----------|-----|
|         | stover |          |                                            |          |     |
|         | Corn   |          |                                            |          |     |
| Jejunum | stover | Positive | metabolism of carbohydrate                 | 7.89E-10 | 240 |
|         | Corn   |          |                                            |          |     |
| Jejunum | stover | Positive | proliferation of tumor cell lines          | 1.17E-09 | 541 |
|         | Corn   |          |                                            |          |     |
| Jejunum | stover | Positive | Organ Degeneration                         | 1.24E-09 | 195 |
|         | Corn   |          |                                            |          |     |
| Jejunum | stover | Positive | colony formation                           | 1.24E-09 | 210 |
|         | Corn   |          |                                            |          |     |
| Jejunum | stover | Positive | function of leukocytes                     | 1.42E-09 | 210 |
|         | Corn   |          |                                            |          |     |
| Jejunum | stover | Positive | growth of embryo                           | 1.43E-09 | 189 |
|         | Corn   |          |                                            |          |     |
| Jejunum | stover | Positive | proliferation of connective tissue cells   | 1.57E-09 | 229 |
|         | Corn   |          |                                            |          |     |
| Jejunum | stover | Positive | morphology of connective tissue            | 1.66E-09 | 183 |
|         | Corn   |          |                                            |          |     |
| Jejunum | stover | Positive | formation of cellular protrusions          | 1.70E-09 | 333 |
|         | Corn   |          |                                            |          |     |
| Jejunum | stover | Positive | cell death of fibroblast cell lines        | 1.87E-09 | 171 |
|         | Corn   |          |                                            |          |     |
| Jejunum | stover | Positive | differentiation of connective tissue cells | 2.73E-09 | 245 |
|         | Corn   |          |                                            |          |     |
| Jejunum | stover | Positive | autosomal recessive disease                | 2.91E-09 | 338 |
|         | Corn   |          |                                            |          |     |
| Jejunum | stover | Positive | growth of connective tissue                | 3.47E-09 | 245 |
|         | Corn   |          |                                            |          |     |
| Jejunum | stover | Positive | interphase                                 | 3.52E-09 | 249 |
|         | Corn   |          |                                            |          |     |
| Jejunum | stover | Positive | migration of tumor cell lines              | 3.61E-09 | 266 |
|         | Corn   |          |                                            |          |     |
| Jejunum | stover | Positive | Movement Disorders                         | 3.88E-09 | 382 |
|         | Corn   |          |                                            |          |     |
| Jejunum | stover | Positive | development of cytoplasm                   | 3.93E-09 | 182 |
|         | Corn   |          |                                            |          |     |
| Jejunum | stover | Positive | function of blood cells                    | 3.93E-09 | 225 |
|         | Corn   |          |                                            |          |     |
| Jejunum | stover | Positive | development of body trunk                  | 4.73E-09 | 400 |
|         | Corn   |          |                                            |          |     |
| Jejunum | stover | Positive | cell death of epithelial cell lines        | 5.43E-09 | 118 |
|         | Corn   |          |                                            |          |     |
| Jejunum | stover | Positive | cell viability of tumor cell lines         | 6.11E-09 | 289 |
| Jejunum | Corn   | Positive | quantity of lymphocytes                    | 1.07E-08 | 264 |

|         |        |          |                                            |          |     |
|---------|--------|----------|--------------------------------------------|----------|-----|
|         | stover |          |                                            |          |     |
|         | Corn   |          |                                            |          |     |
| Jejunum | stover | Positive | quantity of mononuclear leukocytes         | 1.28E-08 | 273 |
|         | Corn   |          |                                            |          |     |
| Jejunum | stover | Positive | cell death of cervical cancer cell lines   | 1.37E-08 | 141 |
|         | Corn   |          |                                            |          |     |
| Jejunum | stover | Positive | apoptosis of fibroblast cell lines         | 1.37E-08 | 133 |
|         | Corn   |          |                                            |          |     |
| Jejunum | stover | Positive | invasion of cells                          | 1.58E-08 | 317 |
|         | Corn   |          |                                            |          |     |
| Jejunum | stover | Positive | differentiation of connective tissue       | 2.16E-08 | 270 |
|         | Corn   |          |                                            |          |     |
| Jejunum | stover | Positive | transactivation of RNA                     | 2.33E-08 | 207 |
|         | Corn   |          |                                            |          |     |
| Jejunum | stover | Positive | ubiquitination of protein                  | 3.40E-08 | 133 |
|         | Corn   |          |                                            |          |     |
| Jejunum | stover | Positive | function of cardiovascular system          | 4.00E-08 | 146 |
|         | Corn   |          |                                            |          |     |
| Jejunum | stover | Positive | phosphorylation of protein                 | 5.23E-08 | 270 |
|         | Corn   |          |                                            |          |     |
| Jejunum | stover | Positive | ubiquitination                             | 5.84E-08 | 134 |
|         | Corn   |          |                                            |          |     |
| Jejunum | stover | Positive | proliferation of blood cells               | 5.99E-08 | 305 |
|         | Corn   |          |                                            |          |     |
| Jejunum | stover | Positive | apoptosis of epithelial cell lines         | 5.99E-08 | 94  |
|         | Corn   |          |                                            |          |     |
| Jejunum | stover | Positive | activation of cells                        | 6.37E-08 | 349 |
|         | Corn   |          |                                            |          |     |
| Jejunum | stover | Positive | growth of epithelial tissue                | 6.56E-08 | 251 |
|         | Corn   |          |                                            |          |     |
| Jejunum | stover | Positive | development of leukocytes                  | 7.74E-08 | 220 |
|         | Corn   |          |                                            |          |     |
| Jejunum | stover | Positive | autosomal dominant disease                 | 9.08E-08 | 236 |
|         | Corn   |          |                                            |          |     |
| Jejunum | stover | Positive | apoptosis of heart cells                   | 9.86E-08 | 81  |
|         | Corn   |          |                                            |          |     |
| Jejunum | stover | Positive | development of connective tissue           | 1.00E-07 | 145 |
|         | Corn   |          |                                            |          |     |
| Jejunum | stover | Positive | concentration of fatty acid                | 1.01E-07 | 113 |
|         | Corn   |          |                                            |          |     |
| Jejunum | stover | Positive | quantity of T lymphocytes                  | 1.18E-07 | 201 |
|         | Corn   |          |                                            |          |     |
| Jejunum | stover | Positive | abnormal morphology of reproductive system | 1.25E-07 | 192 |
| Jejunum | Corn   | Positive | migration of blood cells                   | 1.36E-07 | 313 |

|         |        |          |                                        |          |     |
|---------|--------|----------|----------------------------------------|----------|-----|
|         | stover |          |                                        |          |     |
|         | Corn   |          |                                        |          |     |
| Jejunum | stover | Positive | development of blood cells             | 1.54E-07 | 240 |
|         | Corn   |          |                                        |          |     |
| Jejunum | stover | Positive | cell transformation                    | 1.65E-07 | 175 |
|         | Corn   |          |                                        |          |     |
| Jejunum | stover | Positive | apoptosis of muscle                    | 1.65E-07 | 106 |
|         | Corn   |          |                                        |          |     |
| Jejunum | stover | Positive | leukocyte migration                    | 1.66E-07 | 312 |
|         | Corn   |          |                                        |          |     |
| Jejunum | stover | Positive | proliferation of fibroblast cell lines | 1.90E-07 | 162 |
|         | Corn   |          |                                        |          |     |
| Jejunum | stover | Positive | synthesis of nitric oxide              | 1.93E-07 | 111 |
|         | Corn   |          |                                        |          |     |
| Jejunum | stover | Positive | cell cycle progression                 | 1.94E-07 | 368 |
|         | Corn   |          |                                        |          |     |
| Jejunum | stover | Positive | homing                                 | 1.98E-07 | 213 |
|         | Corn   |          |                                        |          |     |
| Jejunum | stover | Positive | development of lymphocytes             | 2.08E-07 | 206 |
|         | Corn   |          |                                        |          |     |
| Jejunum | stover | Positive | quantity of carbohydrate               | 2.13E-07 | 194 |
|         | Corn   |          |                                        |          |     |
| Jejunum | stover | Positive | apoptosis of muscle cells              | 2.23E-07 | 105 |
|         | Corn   |          |                                        |          |     |
| Jejunum | stover | Positive | formation of cells                     | 2.34E-07 | 347 |
|         | Corn   |          |                                        |          |     |
| Jejunum | stover | Positive | dyskinesia                             | 2.34E-07 | 227 |
|         | Corn   |          |                                        |          |     |
| Jejunum | stover | Positive | development of mononuclear leukocytes  | 2.51E-07 | 207 |
|         | Corn   |          |                                        |          |     |
| Jejunum | stover | Positive | morphology of nervous system           | 2.58E-07 | 282 |
|         | Corn   |          |                                        |          |     |
| Jejunum | stover | Positive | activation of blood cells              | 2.61E-07 | 270 |
|         | Corn   |          |                                        |          |     |
| Jejunum | stover | Positive | proliferation of neuronal cells        | 2.67E-07 | 213 |
|         | Corn   |          |                                        |          |     |
| Jejunum | stover | Positive | synthesis of lipid                     | 2.75E-07 | 259 |
|         | Corn   |          |                                        |          |     |
| Jejunum | stover | Positive | apoptosis of cardiomyocytes            | 2.76E-07 | 78  |
|         | Corn   |          |                                        |          |     |
| Jejunum | stover | Positive | perinatal death                        | 2.81E-07 | 219 |
|         | Corn   |          |                                        |          |     |
| Jejunum | stover | Positive | abnormal morphology of abdomen         | 2.87E-07 | 312 |
| Jejunum | Corn   | Positive | function of muscle                     | 2.98E-07 | 135 |

|         |        |          |                                              |          |     |
|---------|--------|----------|----------------------------------------------|----------|-----|
|         | stover |          |                                              |          |     |
|         | Corn   |          |                                              |          |     |
| Jejunum | stover | Positive | cell movement of leukocytes                  | 3.03E-07 | 276 |
|         | Corn   |          |                                              |          |     |
| Jejunum | stover | Positive | behavior                                     | 3.23E-07 | 348 |
|         | Corn   |          |                                              |          |     |
| Jejunum | stover | Positive | proliferation of immune cells                | 3.32E-07 | 284 |
|         | Corn   |          |                                              |          |     |
| Jejunum | stover | Positive | activation of DNA endogenous promoter        | 3.32E-07 | 418 |
|         | Corn   |          |                                              |          |     |
| Jejunum | stover | Positive | transport of carbohydrate                    | 3.44E-07 | 81  |
|         | Corn   |          |                                              |          |     |
| Jejunum | stover | Positive | morphology of blood vessel                   | 3.62E-07 | 112 |
|         | Corn   |          |                                              |          |     |
| Jejunum | stover | Positive | homing of cells                              | 3.80E-07 | 206 |
|         | Corn   |          |                                              |          |     |
| Jejunum | stover | Positive | cell death of immune cells                   | 3.86E-07 | 240 |
|         | Corn   |          |                                              |          |     |
| Jejunum | stover | Positive | cell movement of myeloid cells               | 3.88E-07 | 200 |
|         | Corn   |          |                                              |          |     |
| Jejunum | stover | Positive | cell death of kidney cell lines              | 4.04E-07 | 119 |
|         | Corn   |          |                                              |          |     |
| Jejunum | stover | Positive | cell death of blood cells                    | 4.05E-07 | 251 |
|         | Corn   |          |                                              |          |     |
| Jejunum | stover | Positive | congenital anomaly of musculoskeletal system | 4.18E-07 | 265 |
|         | Corn   |          |                                              |          |     |
| Jejunum | stover | Positive | proliferation of embryonic cells             | 4.24E-07 | 100 |
|         | Corn   |          |                                              |          |     |
| Jejunum | stover | Positive | uptake of monosaccharide                     | 4.40E-07 | 107 |
|         | Corn   |          |                                              |          |     |
| Jejunum | stover | Positive | morphology of reproductive system            | 4.45E-07 | 198 |
|         | Corn   |          |                                              |          |     |
| Jejunum | stover | Positive | morphology of vessel                         | 4.71E-07 | 120 |
|         | Corn   |          |                                              |          |     |
| Jejunum | stover | Positive | degeneration of nervous system               | 5.00E-07 | 113 |
|         | Corn   |          |                                              |          |     |
| Jejunum | stover | Positive | abnormal morphology of head                  | 5.18E-07 | 296 |
|         | Corn   |          |                                              |          |     |
| Jejunum | stover | Positive | activation of leukocytes                     | 5.72E-07 | 252 |
|         | Corn   |          |                                              |          |     |
| Jejunum | stover | Positive | neuromuscular disease                        | 5.87E-07 | 312 |
|         | Corn   |          |                                              |          |     |
| Jejunum | stover | Positive | neuronal cell death                          | 6.26E-07 | 246 |
| Jejunum | Corn   | Positive | neurological signs                           | 6.29E-07 | 236 |



|         |        |          |                                         |          |     |
|---------|--------|----------|-----------------------------------------|----------|-----|
|         | stover |          |                                         |          |     |
|         | Corn   |          |                                         |          |     |
| Jejunum | stover | Positive | growth of lesion                        | 6.54E-07 | 284 |
|         | Corn   |          |                                         |          |     |
| Jejunum | stover | Positive | apoptosis of epithelial cells           | 6.79E-07 | 112 |
|         | Corn   |          |                                         |          |     |
| Jejunum | stover | Positive | chorea                                  | 6.85E-07 | 211 |
|         | Corn   |          |                                         |          |     |
| Jejunum | stover | Positive | metabolism of membrane lipid derivative | 7.31E-07 | 147 |
|         | Corn   |          |                                         |          |     |
| Jejunum | stover | Positive | Neurodegeneration                       | 7.46E-07 | 120 |
|         | Corn   |          |                                         |          |     |
| Jejunum | stover | Positive | morphology of head                      | 7.58E-07 | 309 |
|         | Corn   |          |                                         |          |     |
| Jejunum | stover | Positive | fibrogenesis                            | 7.58E-07 | 155 |
|         | Corn   |          |                                         |          |     |
| Jejunum | stover | Positive | Huntington's Disease                    | 7.71E-07 | 210 |
|         | Corn   |          |                                         |          |     |
| Jejunum | stover | Positive | consumption of oxygen                   | 7.83E-07 | 66  |
|         | Corn   |          |                                         |          |     |
| Jejunum | stover | Positive | concentration of phospholipid           | 8.09E-07 | 76  |
|         | Corn   |          |                                         |          |     |
| Jejunum | stover | Positive | morphology of skin                      | 8.40E-07 | 107 |
|         | Corn   |          |                                         |          |     |
| Jejunum | stover | Positive | inflammatory response                   | 8.83E-07 | 277 |
|         | Corn   |          |                                         |          |     |
| Jejunum | stover | Positive | accumulation of lipid                   | 9.69E-07 | 116 |
|         | Corn   |          |                                         |          |     |
| Jejunum | stover | Positive | mass of connective tissue               | 9.95E-07 | 82  |
|         | Corn   |          |                                         |          |     |
| Jejunum | stover | Positive | uptake of carbohydrate                  | 1.10E-06 | 113 |
|         | Corn   |          |                                         |          |     |
| Jejunum | stover | Positive | infection by Retroviridae               | 1.10E-06 | 257 |
|         | Corn   |          |                                         |          |     |
| Jejunum | stover | Positive | growth of tumor                         | 1.16E-06 | 282 |
|         | Corn   |          |                                         |          |     |
| Jejunum | stover | Positive | metabolism of monosaccharide            | 1.17E-06 | 54  |
|         | Corn   |          |                                         |          |     |
| Jejunum | stover | Positive | chemotaxis                              | 1.27E-06 | 199 |
|         | Corn   |          |                                         |          |     |
| Jejunum | stover | Positive | MAPKKK cascade                          | 1.28E-06 | 83  |
|         | Corn   |          |                                         |          |     |
| Jejunum | stover | Positive | growth of muscle tissue                 | 1.28E-06 | 141 |
| Jejunum | Corn   | Positive | cell movement of neutrophils            | 1.29E-06 | 115 |

|         |        |          |                                           |          |     |
|---------|--------|----------|-------------------------------------------|----------|-----|
|         | stover |          |                                           |          |     |
|         | Corn   |          |                                           |          |     |
| Jejunum | stover | Positive | proliferation of fibroblasts              | 1.34E-06 | 134 |
|         | Corn   |          |                                           |          |     |
| Jejunum | stover | Positive | synthesis of reactive oxygen species      | 1.35E-06 | 177 |
|         | Corn   |          |                                           |          |     |
| Jejunum | stover | Positive | differentiation of leukocytes             | 1.36E-06 | 241 |
|         | Corn   |          |                                           |          |     |
| Jejunum | stover | Positive | HIV infection                             | 1.43E-06 | 254 |
|         | Corn   |          |                                           |          |     |
| Jejunum | stover | Positive | proliferation of muscle cells             | 1.46E-06 | 140 |
|         | Corn   |          |                                           |          |     |
| Jejunum | stover | Positive | development of lymphatic system           | 1.50E-06 | 135 |
|         | Corn   |          |                                           |          |     |
| Jejunum | stover | Positive | formation of filaments                    | 1.50E-06 | 149 |
|         | Corn   |          |                                           |          |     |
| Jejunum | stover | Positive | disorder of lipid metabolism              | 1.58E-06 | 80  |
|         | Corn   |          |                                           |          |     |
| Jejunum | stover | Positive | cell death of heart cells                 | 1.59E-06 | 88  |
|         | Corn   |          |                                           |          |     |
| Jejunum | stover | Positive | neuritogenesis                            | 1.67E-06 | 211 |
|         | Corn   |          |                                           |          |     |
| Jejunum | stover | Positive | proliferation of mononuclear leukocytes   | 1.69E-06 | 262 |
|         | Corn   |          |                                           |          |     |
| Jejunum | stover | Positive | apoptosis of connective tissue cells      | 1.70E-06 | 114 |
|         | Corn   |          |                                           |          |     |
| Jejunum | stover | Positive | differentiation of bone                   | 1.83E-06 | 153 |
|         | Corn   |          |                                           |          |     |
| Jejunum | stover | Positive | blood protein disorder                    | 1.86E-06 | 141 |
|         | Corn   |          |                                           |          |     |
| Jejunum | stover | Positive | development of cardiovascular tissue      | 1.89E-06 | 139 |
|         | Corn   |          |                                           |          |     |
| Jejunum | stover | Positive | proliferation of lymphocytes              | 1.92E-06 | 258 |
|         | Corn   |          |                                           |          |     |
| Jejunum | stover | Positive | apoptosis of kidney cell lines            | 1.94E-06 | 94  |
|         | Corn   |          |                                           |          |     |
| Jejunum | stover | Positive | cell death of fibroblasts                 | 2.02E-06 | 103 |
|         | Corn   |          |                                           |          |     |
| Jejunum | stover | Positive | metabolism of hexose                      | 2.09E-06 | 48  |
|         | Corn   |          |                                           |          |     |
| Jejunum | stover | Positive | cell movement of granulocytes             | 2.14E-06 | 139 |
|         | Corn   |          |                                           |          |     |
| Jejunum | stover | Positive | cell death of lymphocytes                 | 2.32E-06 | 144 |
| Jejunum | Corn   | Positive | differentiation of mononuclear leukocytes | 2.50E-06 | 196 |

|         |        |          |                                           |          |     |
|---------|--------|----------|-------------------------------------------|----------|-----|
|         | stover |          |                                           |          |     |
|         | Corn   |          |                                           |          |     |
| Jejunum | stover | Positive | differentiation of bone cells             | 2.74E-06 | 151 |
|         | Corn   |          |                                           |          |     |
| Jejunum | stover | Positive | autophagy                                 | 2.79E-06 | 140 |
|         | Corn   |          |                                           |          |     |
| Jejunum | stover | Positive | infection of cells                        | 2.79E-06 | 280 |
|         | Corn   |          |                                           |          |     |
| Jejunum | stover | Positive | development of endothelial tissue         | 2.87E-06 | 137 |
|         | Corn   |          |                                           |          |     |
| Jejunum | stover | Positive | formation of plasma membrane projections  | 3.06E-06 | 214 |
|         | Corn   |          |                                           |          |     |
| Jejunum | stover | Positive | infection by RNA virus                    | 3.14E-06 | 302 |
|         | Corn   |          |                                           |          |     |
| Jejunum | stover | Positive | chemotaxis of cells                       | 3.16E-06 | 191 |
|         | Corn   |          |                                           |          |     |
| Jejunum | stover | Positive | abnormal morphology of nervous system     | 3.19E-06 | 256 |
|         | Corn   |          |                                           |          |     |
| Jejunum | stover | Positive | apoptosis of cervical cancer cell lines   | 3.51E-06 | 108 |
|         | Corn   |          |                                           |          |     |
| Jejunum | stover | Positive | fatty acid metabolism                     | 3.59E-06 | 215 |
|         | Corn   |          |                                           |          |     |
| Jejunum | stover | Positive | formation of cytoskeleton                 | 3.59E-06 | 140 |
|         | Corn   |          |                                           |          |     |
| Jejunum | stover | Positive | cell death of mononuclear leukocytes      | 3.69E-06 | 147 |
|         | Corn   |          |                                           |          |     |
| Jejunum | stover | Positive | proliferation of T lymphocytes            | 3.83E-06 | 216 |
|         | Corn   |          |                                           |          |     |
| Jejunum | stover | Positive | development of epithelial tissue          | 3.88E-06 | 187 |
|         | Corn   |          |                                           |          |     |
| Jejunum | stover | Positive | disorder of basal ganglia                 | 4.06E-06 | 269 |
|         | Corn   |          |                                           |          |     |
| Jejunum | stover | Positive | mass of adipose tissue                    | 4.11E-06 | 76  |
|         | Corn   |          |                                           |          |     |
| Jejunum | stover | Positive | abnormal morphology of epithelial tissue  | 4.13E-06 | 154 |
|         | Corn   |          |                                           |          |     |
| Jejunum | stover | Positive | synthesis of fatty acid                   | 4.13E-06 | 118 |
|         | Corn   |          |                                           |          |     |
| Jejunum | stover | Positive | development of lymphatic system component | 4.13E-06 | 117 |
|         | Corn   |          |                                           |          |     |
| Jejunum | stover | Positive | endothelial cell development              | 4.41E-06 | 132 |
|         | Corn   |          |                                           |          |     |
| Jejunum | stover | Positive | abnormal morphology of embryonic tissue   | 4.42E-06 | 197 |
| Jejunum | Corn   | Positive | quantity of hematopoietic cells           | 4.44E-06 | 162 |

|         |        |          |                                              |          |     |
|---------|--------|----------|----------------------------------------------|----------|-----|
|         | stover |          |                                              |          |     |
|         | Corn   |          |                                              |          |     |
| Jejunum | stover | Positive | morphogenesis of neurons                     | 4.44E-06 | 156 |
|         | Corn   |          |                                              |          |     |
| Jejunum | stover | Positive | Lymphocyte homeostasis                       | 4.50E-06 | 196 |
|         | Corn   |          |                                              |          |     |
| Jejunum | stover | Positive | cell death of heart                          | 4.70E-06 | 89  |
|         | Corn   |          |                                              |          |     |
| Jejunum | stover | Positive | production of reactive oxygen species        | 4.74E-06 | 136 |
|         | Corn   |          |                                              |          |     |
| Jejunum | stover | Positive | homeostasis of leukocytes                    | 5.07E-06 | 199 |
|         | Corn   |          |                                              |          |     |
| Jejunum | stover | Positive | cell movement of phagocytes                  | 5.39E-06 | 197 |
|         | Corn   |          |                                              |          |     |
| Jejunum | stover | Positive | quantity of hematopoietic progenitor cells   | 5.73E-06 | 161 |
|         | Corn   |          |                                              |          |     |
| Jejunum | stover | Positive | cell death of cardiomyocytes                 | 5.76E-06 | 84  |
|         | Corn   |          |                                              |          |     |
| Jejunum | stover | Positive | cell death of kidney cells                   | 5.79E-06 | 130 |
|         | Corn   |          |                                              |          |     |
| Jejunum | stover | Positive | cell death of embryonic cell lines           | 6.18E-06 | 93  |
|         | Corn   |          |                                              |          |     |
| Jejunum | stover | Positive | ion homeostasis of cells                     | 6.20E-06 | 199 |
|         | Corn   |          |                                              |          |     |
| Jejunum | stover | Positive | necrosis of kidney                           | 6.21E-06 | 135 |
|         | Corn   |          |                                              |          |     |
| Jejunum | stover | Positive | secretory pathway                            | 6.57E-06 | 78  |
|         | Corn   |          |                                              |          |     |
| Jejunum | stover | Positive | mass of fat pad                              | 6.58E-06 | 48  |
|         | Corn   |          |                                              |          |     |
| Jejunum | stover | Positive | degeneration of cells                        | 6.70E-06 | 128 |
|         | Corn   |          |                                              |          |     |
| Jejunum | stover | Positive | cell death of muscle cells                   | 6.85E-06 | 125 |
|         | Corn   |          |                                              |          |     |
| Jejunum | stover | Positive | morphology of muscle                         | 6.85E-06 | 125 |
|         | Corn   |          |                                              |          |     |
| Jejunum | stover | Positive | metabolism of reactive oxygen species        | 6.87E-06 | 180 |
|         | Corn   |          |                                              |          |     |
| Jejunum | stover | Positive | G1 phase                                     | 7.02E-06 | 143 |
|         | Corn   |          |                                              |          |     |
| Jejunum | stover | Positive | cell viability of cervical cancer cell lines | 7.20E-06 | 86  |
|         | Corn   |          |                                              |          |     |
| Jejunum | stover | Positive | morphology of lymphatic system component     | 7.56E-06 | 152 |
| Jejunum | Corn   | Positive | endocytosis                                  | 7.56E-06 | 128 |

|         |        |          |                                           |          |     |
|---------|--------|----------|-------------------------------------------|----------|-----|
|         | stover |          |                                           |          |     |
|         | Corn   |          |                                           |          |     |
| Jejunum | stover | Positive | paraproteinemia                           | 7.77E-06 | 125 |
|         | Corn   |          |                                           |          |     |
| Jejunum | stover | Positive | serous neoplasm                           | 7.83E-06 | 216 |
|         | Corn   |          |                                           |          |     |
| Jejunum | stover | Positive | abnormal morphology of blood vessel       | 7.93E-06 | 101 |
|         | Corn   |          |                                           |          |     |
| Jejunum | stover | Positive | synthesis of DNA                          | 8.49E-06 | 152 |
|         | Corn   |          |                                           |          |     |
| Jejunum | stover | Positive | apoptosis of blood cells                  | 8.92E-06 | 178 |
|         | Corn   |          |                                           |          |     |
| Jejunum | stover | Positive | mass of organism                          | 8.95E-06 | 124 |
|         | Corn   |          |                                           |          |     |
| Jejunum | stover | Positive | small GTPase mediated signal transduction | 9.02E-06 | 73  |
|         | Corn   |          |                                           |          |     |
| Jejunum | stover | Positive | cellular infiltration by leukocytes       | 9.02E-06 | 142 |
|         | Corn   |          |                                           |          |     |
| Jejunum | stover | Positive | survival of organism                      | 9.27E-06 | 246 |
|         | Corn   |          |                                           |          |     |
| Jejunum | stover | Positive | size of animal                            | 9.88E-06 | 71  |
|         | Corn   |          |                                           |          |     |
| Jejunum | stover | Positive | apoptosis of leukocytes                   | 9.92E-06 | 165 |
|         | Corn   |          |                                           |          |     |
| Jejunum | stover | Positive | female genital tract serous cancer        | 1.04E-05 | 141 |
|         | Corn   |          |                                           |          |     |
| Jejunum | stover | Positive | quantity of adipose tissue                | 1.10E-05 | 105 |
|         | Corn   |          |                                           |          |     |
| Jejunum | stover | Positive | cell death of muscle                      | 1.13E-05 | 127 |
|         | Corn   |          |                                           |          |     |
| Jejunum | stover | Positive | plasma cell dyscrasia                     | 1.17E-05 | 124 |
|         | Corn   |          |                                           |          |     |
| Jejunum | stover | Positive | infection by HIV-1                        | 1.17E-05 | 215 |
|         | Corn   |          |                                           |          |     |
| Jejunum | stover | Positive | transport of monosaccharide               | 1.17E-05 | 64  |
|         | Corn   |          |                                           |          |     |
| Jejunum | stover | Positive | differentiation of lymphocytes            | 1.20E-05 | 178 |
|         | Corn   |          |                                           |          |     |
| Jejunum | stover | Positive | invasion of tumor cell lines              | 1.20E-05 | 233 |
|         | Corn   |          |                                           |          |     |
| Jejunum | stover | Positive | function of phagocytes                    | 1.24E-05 | 114 |
|         | Corn   |          |                                           |          |     |
| Jejunum | stover | Positive | T cell homeostasis                        | 1.24E-05 | 184 |
| Jejunum | Corn   | Positive | proliferation of smooth muscle cells      | 1.26E-05 | 107 |

|         |        |          |                                       |          |     |
|---------|--------|----------|---------------------------------------|----------|-----|
|         | stover |          |                                       |          |     |
|         | Corn   |          |                                       |          |     |
| Jejunum | stover | Positive | growth of neurites                    | 1.33E-05 | 166 |
|         | Corn   |          |                                       |          |     |
| Jejunum | stover | Positive | proliferation of epithelial cells     | 1.41E-05 | 176 |
|         | Corn   |          |                                       |          |     |
| Jejunum | stover | Positive | necrosis of muscle                    | 1.47E-05 | 126 |
|         | Corn   |          |                                       |          |     |
| Jejunum | stover | Positive | T cell development                    | 1.61E-05 | 179 |
|         | Corn   |          |                                       |          |     |
| Jejunum | stover | Positive | accumulation of cells                 | 1.61E-05 | 129 |
|         | Corn   |          |                                       |          |     |
| Jejunum | stover | Positive | growth of plasma membrane projections | 1.62E-05 | 167 |
|         | Corn   |          |                                       |          |     |
| Jejunum | stover | Positive | morphology of genital organ           | 1.64E-05 | 153 |
|         | Corn   |          |                                       |          |     |
| Jejunum | stover | Positive | apoptosis of lymphocytes              | 1.64E-05 | 127 |
|         | Corn   |          |                                       |          |     |
| Jejunum | stover | Positive | growth of embryonic tissue            | 1.69E-05 | 103 |
|         | Corn   |          |                                       |          |     |
| Jejunum | stover | Positive | morphogenesis of neurites             | 1.70E-05 | 151 |
|         | Corn   |          |                                       |          |     |
| Jejunum | stover | Positive | proliferation of hematopoietic cells  | 1.92E-05 | 96  |
|         | Corn   |          |                                       |          |     |
| Jejunum | stover | Positive | sprouting                             | 1.92E-05 | 140 |
|         | Corn   |          |                                       |          |     |
| Jejunum | stover | Positive | plasticity of synapse                 | 1.93E-05 | 50  |
|         | Corn   |          |                                       |          |     |
| Jejunum | stover | Positive | arrest in interphase                  | 1.96E-05 | 150 |
|         | Corn   |          |                                       |          |     |
| Jejunum | stover | Positive | function of heart                     | 2.05E-05 | 88  |
|         | Corn   |          |                                       |          |     |
| Jejunum | stover | Positive | differentiation of blood cells        | 2.05E-05 | 289 |
|         | Corn   |          |                                       |          |     |
| Jejunum | stover | Positive | abnormal morphology of skin           | 2.16E-05 | 92  |
|         | Corn   |          |                                       |          |     |
| Jejunum | stover | Positive | formation of lymphoid organ           | 2.27E-05 | 99  |
|         | Corn   |          |                                       |          |     |
| Jejunum | stover | Positive | development of neurons                | 2.29E-05 | 269 |
|         | Corn   |          |                                       |          |     |
| Jejunum | stover | Positive | abnormal morphology of genital organ  | 2.35E-05 | 147 |
|         | Corn   |          |                                       |          |     |
| Jejunum | stover | Positive | activation of neuroglia               | 2.37E-05 | 54  |
| Jejunum | Corn   | Positive | apoptosis of hepatocytes              | 2.37E-05 | 54  |

|         |        |          |                                         |          |     |
|---------|--------|----------|-----------------------------------------|----------|-----|
|         | stover |          |                                         |          |     |
|         | Corn   |          |                                         |          |     |
| Jejunum | stover | Positive | cardiogenesis                           | 2.38E-05 | 168 |
|         | Corn   |          |                                         |          |     |
| Jejunum | stover | Positive | function of myeloid cells               | 2.46E-05 | 90  |
|         | Corn   |          |                                         |          |     |
| Jejunum | stover | Positive | cellular infiltration of cells          | 2.54E-05 | 143 |
|         | Corn   |          |                                         |          |     |
| Jejunum | stover | Positive | attachment of cells                     | 2.61E-05 | 55  |
|         | Corn   |          |                                         |          |     |
| Jejunum | stover | Positive | polymerization of protein               | 2.71E-05 | 134 |
|         | Corn   |          |                                         |          |     |
| Jejunum | stover | Positive | bone mineral density                    | 2.72E-05 | 68  |
|         | Corn   |          |                                         |          |     |
| Jejunum | stover | Positive | Waldenstrom's macroglobulinemia         | 2.78E-05 | 73  |
|         | Corn   |          |                                         |          |     |
| Jejunum | stover | Positive | quantity of thymus gland                | 2.81E-05 | 88  |
|         | Corn   |          |                                         |          |     |
| Jejunum | stover | Positive | aggregation of blood platelets          | 2.88E-05 | 74  |
|         | Corn   |          |                                         |          |     |
| Jejunum | stover | Positive | synthesis of carbohydrate               | 2.88E-05 | 152 |
|         | Corn   |          |                                         |          |     |
| Jejunum | stover | Positive | atrophy of muscle                       | 2.89E-05 | 59  |
|         | Corn   |          |                                         |          |     |
| Jejunum | stover | Positive | hereditary motor and sensory neuropathy | 2.95E-05 | 39  |
|         | Corn   |          |                                         |          |     |
| Jejunum | stover | Positive | abnormal morphology of digestive system | 3.24E-05 | 191 |
|         | Corn   |          |                                         |          |     |
| Jejunum | stover | Positive | cellular infiltration                   | 3.24E-05 | 156 |
|         | Corn   |          |                                         |          |     |
| Jejunum | stover | Positive | quantity of thymocytes                  | 3.24E-05 | 87  |
|         | Corn   |          |                                         |          |     |
| Jejunum | stover | Positive | formation of thymus gland               | 3.25E-05 | 64  |
|         | Corn   |          |                                         |          |     |
| Jejunum | stover | Positive | morphology of heart ventricle           | 3.44E-05 | 74  |
|         | Corn   |          |                                         |          |     |
| Jejunum | stover | Positive | G1/S phase transition                   | 3.45E-05 | 81  |
|         | Corn   |          |                                         |          |     |
| Jejunum | stover | Positive | cell death of T lymphocytes             | 3.59E-05 | 115 |
|         | Corn   |          |                                         |          |     |
| Jejunum | stover | Positive | apoptosis of mononuclear leukocytes     | 3.75E-05 | 129 |
|         | Corn   |          |                                         |          |     |
| Jejunum | stover | Positive | exocytosis                              | 4.01E-05 | 73  |
| Jejunum | Corn   | Positive | autophagy of cells                      | 4.02E-05 | 98  |

|         |        |          |                                                 |          |      |
|---------|--------|----------|-------------------------------------------------|----------|------|
|         | stover |          |                                                 |          |      |
|         | Corn   |          |                                                 |          |      |
| Jejunum | stover | Positive | apoptosis of neuroblastoma cell lines           | 4.02E-05 | 50   |
|         | Corn   |          |                                                 |          |      |
| Jejunum | stover | Positive | degeneration of central nervous system          | 4.32E-05 | 53   |
|         | Corn   |          |                                                 |          |      |
| Jejunum | stover | Positive | organization of actin cytoskeleton              | 4.34E-05 | 110  |
|         | Corn   |          |                                                 |          |      |
| Jejunum | stover | Positive | genital tumor                                   | 4.51E-05 | 1264 |
|         | Corn   |          |                                                 |          |      |
| Jejunum | stover | Positive | dysmyelination                                  | 4.73E-05 | 54   |
|         | Corn   |          |                                                 |          |      |
| Jejunum | stover | Positive | transport of D-glucose                          | 4.81E-05 | 57   |
|         | Corn   |          |                                                 |          |      |
| Jejunum | stover | Positive | quantity of protein in blood                    | 4.84E-05 | 178  |
|         | Corn   |          |                                                 |          |      |
| Jejunum | stover | Positive | quantity of lymphoid organ                      | 4.84E-05 | 112  |
|         | Corn   |          |                                                 |          |      |
| Jejunum | stover | Positive | abnormal morphology of internal genitalia       | 5.05E-05 | 126  |
|         | Corn   |          |                                                 |          |      |
| Jejunum | stover | Positive | morphology of bone                              | 5.07E-05 | 159  |
|         | Corn   |          |                                                 |          |      |
| Jejunum | stover | Positive | hereditary polyneuropathy                       | 5.10E-05 | 42   |
|         | Corn   |          |                                                 |          |      |
| Jejunum | stover | Positive | benign neoplasia                                | 5.22E-05 | 312  |
|         | Corn   |          |                                                 |          |      |
| Jejunum | stover | Positive | vascularization                                 | 5.22E-05 | 88   |
|         | Corn   |          |                                                 |          |      |
| Jejunum | stover | Positive | quantity of lymphatic system component          | 5.29E-05 | 135  |
|         | Corn   |          |                                                 |          |      |
| Jejunum | stover | Positive | abnormal morphology of membrane tissue          | 5.29E-05 | 66   |
|         | Corn   |          |                                                 |          |      |
| Jejunum | stover | Positive | cellular degradation                            | 5.31E-05 | 94   |
|         | Corn   |          |                                                 |          |      |
| Jejunum | stover | Positive | proliferation of endothelial cells              | 5.37E-05 | 113  |
|         | Corn   |          |                                                 |          |      |
| Jejunum | stover | Positive | hypersensitive reaction                         | 5.43E-05 | 152  |
|         | Corn   |          |                                                 |          |      |
| Jejunum | stover | Positive | I-kappaB kinase/NF-kappaB cascade               | 5.48E-05 | 67   |
|         | Corn   |          |                                                 |          |      |
| Jejunum | stover | Positive | polyneuropathy                                  | 5.97E-05 | 45   |
|         | Corn   |          |                                                 |          |      |
| Jejunum | stover | Positive | proliferation of lymphatic system cells         | 6.07E-05 | 76   |
| Jejunum | Corn   | Positive | proliferation of hematopoietic progenitor cells | 6.10E-05 | 90   |



|         |        |          |                                         |          |     |
|---------|--------|----------|-----------------------------------------|----------|-----|
|         | stover |          |                                         |          |     |
|         | Corn   |          |                                         |          |     |
| Jejunum | stover | Positive | targeting of protein                    | 6.10E-05 | 52  |
|         | Corn   |          |                                         |          |     |
| Jejunum | stover | Positive | S phase                                 | 6.10E-05 | 96  |
|         | Corn   |          |                                         |          |     |
| Jejunum | stover | Positive | abnormal morphology of bone             | 6.32E-05 | 154 |
|         | Corn   |          |                                         |          |     |
| Jejunum | stover | Positive | metabolism of D-hexose                  | 6.32E-05 | 40  |
|         | Corn   |          |                                         |          |     |
| Jejunum | stover | Positive | morphology of digestive system          | 6.32E-05 | 198 |
|         | Corn   |          |                                         |          |     |
| Jejunum | stover | Positive | formation of muscle                     | 6.36E-05 | 141 |
|         | Corn   |          |                                         |          |     |
| Jejunum | stover | Positive | function of blood vessel                | 6.74E-05 | 26  |
|         | Corn   |          |                                         |          |     |
| Jejunum | stover | Positive | accumulation of blood cells             | 6.79E-05 | 102 |
|         | Corn   |          |                                         |          |     |
| Jejunum | stover | Positive | cell death of liver cells               | 6.79E-05 | 74  |
|         | Corn   |          |                                         |          |     |
| Jejunum | stover | Positive | size of bone                            | 6.81E-05 | 101 |
|         | Corn   |          |                                         |          |     |
| Jejunum | stover | Positive | cell death of hepatocytes               | 6.95E-05 | 60  |
|         | Corn   |          |                                         |          |     |
| Jejunum | stover | Positive | long-term potentiation                  | 6.96E-05 | 90  |
|         | Corn   |          |                                         |          |     |
| Jejunum | stover | Positive | recruitment of phagocytes               | 6.96E-05 | 91  |
|         | Corn   |          |                                         |          |     |
| Jejunum | stover | Positive | function of smooth muscle               | 6.96E-05 | 39  |
|         | Corn   |          |                                         |          |     |
| Jejunum | stover | Positive | lysosomal storage disease               | 6.96E-05 | 39  |
|         | Corn   |          |                                         |          |     |
| Jejunum | stover | Positive | adhesion of immune cells                | 7.08E-05 | 125 |
|         | Corn   |          |                                         |          |     |
| Jejunum | stover | Positive | abnormal morphology of gonad            | 7.18E-05 | 130 |
|         | Corn   |          |                                         |          |     |
| Jejunum | stover | Positive | formation of lymphatic system component | 7.38E-05 | 106 |
|         | Corn   |          |                                         |          |     |
| Jejunum | stover | Positive | abnormal morphology of muscle           | 7.57E-05 | 114 |
|         | Corn   |          |                                         |          |     |
| Jejunum | stover | Positive | quantity of interleukin                 | 7.57E-05 | 55  |
|         | Corn   |          |                                         |          |     |
| Jejunum | stover | Positive | concentration of acylglycerol           | 7.73E-05 | 120 |
| Jejunum | Corn   | Positive | metabolism of D-glucose                 | 7.73E-05 | 38  |

|         |        |          |                                         |          |     |
|---------|--------|----------|-----------------------------------------|----------|-----|
|         | stover |          |                                         |          |     |
|         | Corn   |          |                                         |          |     |
| Jejunum | stover | Positive | mitosis                                 | 7.90E-05 | 173 |
|         | Corn   |          |                                         |          |     |
| Jejunum | stover | Positive | apoptosis of embryonic cell lines       | 8.28E-05 | 69  |
|         | Corn   |          |                                         |          |     |
| Jejunum | stover | Positive | size of embryo                          | 8.59E-05 | 127 |
|         | Corn   |          |                                         |          |     |
| Jejunum | stover | Positive | hydrolysis of lipid                     | 8.77E-05 | 71  |
|         | Corn   |          |                                         |          |     |
| Jejunum | stover | Positive | differentiation of muscle               | 9.23E-05 | 109 |
|         | Corn   |          |                                         |          |     |
| Jejunum | stover | Positive | morphology of gonad                     | 9.23E-05 | 134 |
|         | Corn   |          |                                         |          |     |
| Jejunum | stover | Positive | cell death of liver                     | 9.23E-05 | 88  |
|         | Corn   |          |                                         |          |     |
| Jejunum | stover | Positive | neonatal death                          | 9.30E-05 | 154 |
|         | Corn   |          |                                         |          |     |
| Jejunum | stover | Positive | activation of lymphocytes               | 9.30E-05 | 161 |
|         | Corn   |          |                                         |          |     |
| Jejunum | stover | Positive | familial dementia                       | 9.35E-05 | 22  |
|         | Corn   |          |                                         |          |     |
| Jejunum | stover | Positive | peripheral neuropathy                   | 9.63E-05 | 59  |
|         | Corn   |          |                                         |          |     |
| Jejunum | stover | Positive | morphology of central nervous system    | 9.79E-05 | 178 |
|         | Corn   |          |                                         |          |     |
| Jejunum | stover | Positive | branching of cells                      | 9.79E-05 | 131 |
|         | Corn   |          |                                         |          |     |
| Jejunum | stover | Positive | differentiation of muscle cells         | 9.90E-05 | 102 |
|         | Corn   |          |                                         |          |     |
| Jejunum | stover | Positive | demyelination                           | 1.03E-04 | 48  |
|         | Corn   |          |                                         |          |     |
| Jejunum | stover | Positive | hepatic steatosis                       | 1.03E-04 | 97  |
|         | Corn   |          |                                         |          |     |
| Jejunum | stover | Positive | quantity of B lymphocytes               | 1.03E-04 | 123 |
|         | Corn   |          |                                         |          |     |
| Jejunum | stover | Positive | morphology of blood cells               | 1.03E-04 | 146 |
|         | Corn   |          |                                         |          |     |
| Jejunum | stover | Positive | morphology of skull                     | 1.03E-04 | 83  |
|         | Corn   |          |                                         |          |     |
| Jejunum | stover | Positive | transformation of fibroblast cell lines | 1.04E-04 | 94  |
|         | Corn   |          |                                         |          |     |
| Jejunum | stover | Positive | apoptosis of liver                      | 1.05E-04 | 61  |
| Jejunum | Corn   | Positive | formation of vascular lesion            | 1.05E-04 | 46  |

|         |        |          |                                      |          |     |
|---------|--------|----------|--------------------------------------|----------|-----|
|         | stover |          |                                      |          |     |
|         | Corn   |          |                                      |          |     |
| Jejunum | stover | Positive | quantity of IgM                      | 1.05E-04 | 54  |
|         | Corn   |          |                                      |          |     |
| Jejunum | stover | Positive | differentiation of muscle cell lines | 1.09E-04 | 62  |
|         | Corn   |          |                                      |          |     |
| Jejunum | stover | Positive | activation of mononuclear leukocytes | 1.09E-04 | 168 |
|         | Corn   |          |                                      |          |     |
| Jejunum | stover | Positive | function of vascular smooth muscle   | 1.09E-04 | 16  |
|         | Corn   |          |                                      |          |     |
| Jejunum | stover | Positive | engulfment of cells                  | 1.10E-04 | 143 |
|         | Corn   |          |                                      |          |     |
| Jejunum | stover | Positive | morphology of lymphoid organ         | 1.13E-04 | 138 |
|         | Corn   |          |                                      |          |     |
| Jejunum | stover | Positive | cell movement of fibroblasts         | 1.14E-04 | 69  |
|         | Corn   |          |                                      |          |     |
| Jejunum | stover | Positive | accumulation of leukocytes           | 1.16E-04 | 97  |
|         | Corn   |          |                                      |          |     |
| Jejunum | stover | Positive | abnormal morphology of skull         | 1.17E-04 | 81  |
|         | Corn   |          |                                      |          |     |
| Jejunum | stover | Positive | metabolism of protein                | 1.18E-04 | 324 |
|         | Corn   |          |                                      |          |     |
| Jejunum | stover | Positive | binding of DNA                       | 1.18E-04 | 180 |
|         | Corn   |          |                                      |          |     |
| Jejunum | stover | Positive | necrosis of liver                    | 1.19E-04 | 87  |
|         | Corn   |          |                                      |          |     |
| Jejunum | stover | Positive | export of molecule                   | 1.19E-04 | 106 |
|         | Corn   |          |                                      |          |     |
| Jejunum | stover | Positive | dyslipidemia                         | 1.19E-04 | 43  |
|         | Corn   |          |                                      |          |     |
| Jejunum | stover | Positive | concentration of phosphatidic acid   | 1.19E-04 | 53  |
|         | Corn   |          |                                      |          |     |
| Jejunum | stover | Positive | growth of lymphatic system component | 1.20E-04 | 72  |
|         | Corn   |          |                                      |          |     |
| Jejunum | stover | Positive | outgrowth of neurons                 | 1.20E-04 | 143 |
|         | Corn   |          |                                      |          |     |
| Jejunum | stover | Positive | death of embryo                      | 1.31E-04 | 58  |
|         | Corn   |          |                                      |          |     |
| Jejunum | stover | Positive | transport of protein                 | 1.31E-04 | 108 |
|         | Corn   |          |                                      |          |     |
| Jejunum | stover | Positive | migration of connective tissue cells | 1.31E-04 | 68  |
|         | Corn   |          |                                      |          |     |
| Jejunum | stover | Positive | arrest in proliferation of cells     | 1.33E-04 | 79  |
| Jejunum | Corn   | Positive | internalization of cells             | 1.34E-04 | 63  |

|         |        |          |                                             |          |     |
|---------|--------|----------|---------------------------------------------|----------|-----|
|         | stover |          |                                             |          |     |
|         | Corn   |          |                                             |          |     |
| Jejunum | stover | Positive | uptake of D-hexose                          | 1.35E-04 | 82  |
|         | Corn   |          |                                             |          |     |
| Jejunum | stover | Positive | seizure disorder                            | 1.36E-04 | 163 |
|         | Corn   |          |                                             |          |     |
| Jejunum | stover | Positive | abnormal morphology of left ventricle       | 1.37E-04 | 35  |
|         | Corn   |          |                                             |          |     |
| Jejunum | stover | Positive | abnormal morphology of lymphoid organ       | 1.39E-04 | 133 |
|         | Corn   |          |                                             |          |     |
| Jejunum | stover | Positive | transmigration of cells                     | 1.43E-04 | 60  |
|         | Corn   |          |                                             |          |     |
| Jejunum | stover | Positive | abnormal morphology of heart ventricle      | 1.47E-04 | 66  |
|         | Corn   |          |                                             |          |     |
| Jejunum | stover | Positive | expansion of cells                          | 1.47E-04 | 108 |
|         | Corn   |          |                                             |          |     |
| Jejunum | stover | Positive | neurodegeneration of central nervous system | 1.48E-04 | 45  |
|         | Corn   |          |                                             |          |     |
| Jejunum | stover | Positive | abnormal morphology of hepatobiliary system | 1.50E-04 | 76  |
|         | Corn   |          |                                             |          |     |
| Jejunum | stover | Positive | biosynthesis of nucleoside triphosphate     | 1.51E-04 | 43  |
|         | Corn   |          |                                             |          |     |
| Jejunum | stover | Positive | quantity of cytokine                        | 1.54E-04 | 92  |
|         | Corn   |          |                                             |          |     |
| Jejunum | stover | Positive | apoptosis of fibroblasts                    | 1.54E-04 | 80  |
|         | Corn   |          |                                             |          |     |
| Jejunum | stover | Positive | uptake of D-glucose                         | 1.55E-04 | 81  |
|         | Corn   |          |                                             |          |     |
| Jejunum | stover | Positive | activation of enzyme                        | 1.59E-04 | 136 |
|         | Corn   |          |                                             |          |     |
| Jejunum | stover | Positive | morphology of left ventricle                | 1.63E-04 | 36  |
|         | Corn   |          |                                             |          |     |
| Jejunum | stover | Positive | migration of fibroblasts                    | 1.64E-04 | 55  |
|         | Corn   |          |                                             |          |     |
| Jejunum | stover | Positive | degeneration of brain                       | 1.68E-04 | 49  |
|         | Corn   |          |                                             |          |     |
| Jejunum | stover | Positive | abnormal morphology of pericardium          | 1.70E-04 | 38  |
|         | Corn   |          |                                             |          |     |
| Jejunum | stover | Positive | cleavage of lipid                           | 1.70E-04 | 74  |
|         | Corn   |          |                                             |          |     |
| Jejunum | stover | Positive | outgrowth of neurites                       | 1.71E-04 | 141 |
|         | Corn   |          |                                             |          |     |
| Jejunum | stover | Positive | skin abnormality                            | 1.81E-04 | 83  |
| Jejunum | Corn   | Positive | metabolism of DNA                           | 1.81E-04 | 139 |

|         |        |          |                                        |          |     |
|---------|--------|----------|----------------------------------------|----------|-----|
|         | stover |          |                                        |          |     |
|         | Corn   |          |                                        |          |     |
| Jejunum | stover | Positive | demyelinating peripheral neuropathy    | 1.84E-04 | 28  |
|         | Corn   |          |                                        |          |     |
| Jejunum | stover | Positive | formation of eye                       | 1.87E-04 | 152 |
|         | Corn   |          |                                        |          |     |
| Jejunum | stover | Positive | adenoma                                | 1.88E-04 | 189 |
|         | Corn   |          |                                        |          |     |
| Jejunum | stover | Positive | abnormal morphology of liver           | 1.92E-04 | 71  |
|         | Corn   |          |                                        |          |     |
| Jejunum | stover | Positive | concentration of ATP                   | 1.92E-04 | 48  |
|         | Corn   |          |                                        |          |     |
| Jejunum | stover | Positive | migration of carcinoma cell lines      | 1.94E-04 | 64  |
|         | Corn   |          |                                        |          |     |
| Jejunum | stover | Positive | cognition                              | 1.94E-04 | 157 |
|         | Corn   |          |                                        |          |     |
| Jejunum | stover | Positive | biosynthesis of purine ribonucleotide  | 1.94E-04 | 41  |
|         | Corn   |          |                                        |          |     |
| Jejunum | stover | Positive | chemotaxis of myeloid cells            | 1.97E-04 | 104 |
|         | Corn   |          |                                        |          |     |
| Jejunum | stover | Positive | seizures                               | 1.99E-04 | 139 |
|         | Corn   |          |                                        |          |     |
| Jejunum | stover | Positive | branching of neurons                   | 2.03E-04 | 102 |
|         | Corn   |          |                                        |          |     |
| Jejunum | stover | Positive | hydrolysis of phosphoinositide         | 2.04E-04 | 26  |
|         | Corn   |          |                                        |          |     |
| Jejunum | stover | Positive | learning                               | 2.05E-04 | 145 |
|         | Corn   |          |                                        |          |     |
| Jejunum | stover | Positive | uterine serous papillary cancer        | 2.06E-04 | 84  |
|         | Corn   |          |                                        |          |     |
| Jejunum | stover | Positive | neurodegeneration of brain             | 2.10E-04 | 44  |
|         | Corn   |          |                                        |          |     |
| Jejunum | stover | Positive | cell movement of endothelial cells     | 2.10E-04 | 124 |
|         | Corn   |          |                                        |          |     |
| Jejunum | stover | Positive | Hypertrophy                            | 2.12E-04 | 163 |
|         | Corn   |          |                                        |          |     |
| Jejunum | stover | Positive | Bleeding                               | 2.13E-04 | 147 |
|         | Corn   |          |                                        |          |     |
| Jejunum | stover | Positive | activation of antigen presenting cells | 2.16E-04 | 112 |
|         | Corn   |          |                                        |          |     |
| Jejunum | stover | Positive | permeability of cells                  | 2.19E-04 | 40  |
|         | Corn   |          |                                        |          |     |
| Jejunum | stover | Positive | secretion of molecule                  | 2.27E-04 | 188 |
| Jejunum | Corn   | Positive | cell death of tumor                    | 2.32E-04 | 133 |

|         |        |          |                                           |          |      |
|---------|--------|----------|-------------------------------------------|----------|------|
|         | stover |          |                                           |          |      |
|         | Corn   |          |                                           |          |      |
| Jejunum | stover | Positive | apoptosis of liver cells                  | 2.34E-04 | 59   |
|         | Corn   |          |                                           |          |      |
| Jejunum | stover | Positive | Cytosis                                   | 2.39E-04 | 113  |
|         | Corn   |          |                                           |          |      |
| Jejunum | stover | Positive | replication of virus                      | 2.42E-04 | 191  |
|         | Corn   |          |                                           |          |      |
| Jejunum | stover | Positive | growth of liver                           | 2.59E-04 | 70   |
|         | Corn   |          |                                           |          |      |
| Jejunum | stover | Positive | concentration of sterol                   | 2.65E-04 | 108  |
|         | Corn   |          |                                           |          |      |
| Jejunum | stover | Positive | replication of RNA virus                  | 2.66E-04 | 173  |
|         | Corn   |          |                                           |          |      |
| Jejunum | stover | Positive | hepatocellular carcinoma                  | 2.69E-04 | 1296 |
|         | Corn   |          |                                           |          |      |
| Jejunum | stover | Positive | degeneration of neurons                   | 2.71E-04 | 86   |
|         | Corn   |          |                                           |          |      |
| Jejunum | stover | Positive | recruitment of macrophages                | 2.76E-04 | 42   |
|         | Corn   |          |                                           |          |      |
| Jejunum | stover | Positive | morphology of epidermis                   | 2.77E-04 | 54   |
|         | Corn   |          |                                           |          |      |
| Jejunum | stover | Positive | cell viability of connective tissue cells | 2.88E-04 | 51   |
|         | Corn   |          |                                           |          |      |
| Jejunum | stover | Positive | glycolysis                                | 2.88E-04 | 51   |
|         | Corn   |          |                                           |          |      |
| Jejunum | stover | Positive | abnormal morphology of testis             | 2.93E-04 | 93   |
|         | Corn   |          |                                           |          |      |
| Jejunum | stover | Positive | necrosis of tumor                         | 2.93E-04 | 132  |
|         | Corn   |          |                                           |          |      |
| Jejunum | stover | Positive | function of lymphocytes                   | 2.94E-04 | 119  |
|         | Corn   |          |                                           |          |      |
| Jejunum | stover | Positive | proliferation of tumor cells              | 2.97E-04 | 161  |
|         | Corn   |          |                                           |          |      |
| Jejunum | stover | Positive | atherogenesis                             | 2.97E-04 | 33   |
|         | Corn   |          |                                           |          |      |
| Jejunum | stover | Positive | development of hematopoietic system       | 3.03E-04 | 89   |
|         | Corn   |          |                                           |          |      |
| Jejunum | stover | Positive | differentiation of osteoclasts            | 3.04E-04 | 71   |
|         | Corn   |          |                                           |          |      |
| Jejunum | stover | Positive | quantity of antigen presenting cells      | 3.10E-04 | 98   |
|         | Corn   |          |                                           |          |      |
| Jejunum | stover | Positive | concentration of Ca <sup>2+</sup>         | 3.10E-04 | 49   |
| Jejunum | Corn   | Positive | quantity of connective tissue cells       | 3.10E-04 | 85   |

|         |        |          |                                          |          |      |
|---------|--------|----------|------------------------------------------|----------|------|
|         | stover |          |                                          |          |      |
|         | Corn   |          |                                          |          |      |
| Jejunum | stover | Positive | abnormal morphology of lymph node        | 3.10E-04 | 57   |
|         | Corn   |          |                                          |          |      |
| Jejunum | stover | Positive | metabolism of glycolipid                 | 3.10E-04 | 57   |
|         | Corn   |          |                                          |          |      |
| Jejunum | stover | Positive | chemotaxis of phagocytes                 | 3.15E-04 | 104  |
|         | Corn   |          |                                          |          |      |
| Jejunum | stover | Positive | metabolism of nucleoside triphosphate    | 3.15E-04 | 53   |
|         | Corn   |          |                                          |          |      |
| Jejunum | stover | Positive | production of protein                    | 3.18E-04 | 115  |
|         | Corn   |          |                                          |          |      |
| Jejunum | stover | Positive | quantity of phagocytes                   | 3.19E-04 | 146  |
|         | Corn   |          |                                          |          |      |
| Jejunum | stover | Positive | shape change of neurons                  | 3.19E-04 | 103  |
|         | Corn   |          |                                          |          |      |
| Jejunum | stover | Positive | quantity of double-positive thymocyte    | 3.26E-04 | 44   |
|         | Corn   |          |                                          |          |      |
| Jejunum | stover | Positive | thickness of connective tissue           | 3.28E-04 | 23   |
|         | Corn   |          |                                          |          |      |
| Jejunum | stover | Positive | formation of actin filaments             | 3.34E-04 | 107  |
|         | Corn   |          |                                          |          |      |
| Jejunum | stover | Positive | morphology of lymph node                 | 3.40E-04 | 60   |
|         | Corn   |          |                                          |          |      |
| Jejunum | stover | Positive | apoptosis of T lymphocytes               | 3.40E-04 | 99   |
|         | Corn   |          |                                          |          |      |
| Jejunum | stover | Positive | proliferation of liver cells             | 3.42E-04 | 69   |
|         | Corn   |          |                                          |          |      |
| Jejunum | stover | Positive | branching of neurites                    | 3.45E-04 | 98   |
|         | Corn   |          |                                          |          |      |
| Jejunum | stover | Positive | Dermatitis                               | 3.50E-04 | 149  |
|         | Corn   |          |                                          |          |      |
| Jejunum | stover | Positive | length of cells                          | 3.51E-04 | 40   |
|         | Corn   |          |                                          |          |      |
| Jejunum | stover | Positive | adenocarcinoma                           | 3.52E-04 | 1984 |
|         | Corn   |          |                                          |          |      |
| Jejunum | stover | Positive | abnormal morphology of skeleton          | 3.54E-04 | 96   |
|         | Corn   |          |                                          |          |      |
| Jejunum | stover | Positive | cell movement of connective tissue cells | 3.56E-04 | 80   |
|         | Corn   |          |                                          |          |      |
| Jejunum | stover | Positive | weight gain                              | 3.56E-04 | 109  |
|         | Corn   |          |                                          |          |      |
| Jejunum | stover | Positive | proliferation of myeloid cells           | 3.79E-04 | 46   |
| Jejunum | Corn   | Positive | cell death of breast cancer cell lines   | 3.84E-04 | 116  |

|         |        |          |                                         |          |      |
|---------|--------|----------|-----------------------------------------|----------|------|
|         | stover |          |                                         |          |      |
|         | Corn   |          |                                         |          |      |
| Jejunum | stover | Positive | function of cardiac muscle              | 3.91E-04 | 67   |
|         | Corn   |          |                                         |          |      |
| Jejunum | stover | Positive | formation of leukocytes                 | 3.92E-04 | 59   |
|         | Corn   |          |                                         |          |      |
| Jejunum | stover | Positive | breast or colorectal cancer             | 3.93E-04 | 1527 |
|         | Corn   |          |                                         |          |      |
| Jejunum | stover | Positive | quantity of polyunsaturated fatty acids | 4.06E-04 | 47   |
|         | Corn   |          |                                         |          |      |
| Jejunum | stover | Positive | female genital neoplasm                 | 4.07E-04 | 1104 |
|         | Corn   |          |                                         |          |      |
| Jejunum | stover | Positive | adhesion of blood cells                 | 4.09E-04 | 130  |
|         | Corn   |          |                                         |          |      |
| Jejunum | stover | Positive | hereditary neuropathy                   | 4.11E-04 | 61   |
|         | Corn   |          |                                         |          |      |
| Jejunum | stover | Positive | phosphorylation of L-amino acid         | 4.11E-04 | 79   |
|         | Corn   |          |                                         |          |      |
| Jejunum | stover | Positive | dyspnea                                 | 4.15E-04 | 51   |
|         | Corn   |          |                                         |          |      |
| Jejunum | stover | Positive | development of digestive system         | 4.27E-04 | 132  |
|         | Corn   |          |                                         |          |      |
| Jejunum | stover | Positive | metabolism of glycosphingolipid         | 4.30E-04 | 48   |
|         | Corn   |          |                                         |          |      |
| Jejunum | stover | Positive | entrance of Ca <sup>2+</sup>            | 4.30E-04 | 32   |
|         | Corn   |          |                                         |          |      |
| Jejunum | stover | Positive | quantity of embryonic cells             | 4.30E-04 | 32   |
|         | Corn   |          |                                         |          |      |
| Jejunum | stover | Positive | length of long bones                    | 4.31E-04 | 25   |
|         | Corn   |          |                                         |          |      |
| Jejunum | stover | Positive | metabolism of sphingolipid              | 4.32E-04 | 52   |
|         | Corn   |          |                                         |          |      |
| Jejunum | stover | Positive | stress response of cells                | 4.32E-04 | 52   |
|         | Corn   |          |                                         |          |      |
| Jejunum | stover | Positive | accumulation of sterol                  | 4.33E-04 | 29   |
|         | Corn   |          |                                         |          |      |
| Jejunum | stover | Positive | cell viability of cerebral cortex cells | 4.33E-04 | 29   |
|         | Corn   |          |                                         |          |      |
| Jejunum | stover | Positive | infection of embryonic cell lines       | 4.38E-04 | 97   |
|         | Corn   |          |                                         |          |      |
| Jejunum | stover | Positive | infection of epithelial cell lines      | 4.38E-04 | 97   |
|         | Corn   |          |                                         |          |      |
| Jejunum | stover | Positive | function of antigen presenting cells    | 4.41E-04 | 87   |
| Jejunum | Corn   | Positive | development of abdomen                  | 4.54E-04 | 195  |



|         |        |          |                              |          |      |
|---------|--------|----------|------------------------------|----------|------|
|         | stover |          |                              |          |      |
|         | Corn   |          |                              |          |      |
| Jejunum | stover | Negative | morbidity or mortality       | 6.17E-16 | 514  |
|         | Corn   |          |                              |          |      |
| Jejunum | stover | Negative | organismal death             | 6.17E-16 | 507  |
|         | Corn   |          |                              |          |      |
| Jejunum | stover | Negative | cell death                   | 2.90E-15 | 665  |
|         | Corn   |          |                              |          |      |
| Jejunum | stover | Negative | malignant solid tumor        | 3.30E-15 | 1827 |
|         | Corn   |          |                              |          |      |
| Jejunum | stover | Negative | cancer                       | 4.90E-14 | 1841 |
|         | Corn   |          |                              |          |      |
| Jejunum | stover | Negative | apoptosis                    | 1.32E-13 | 537  |
|         | Corn   |          |                              |          |      |
| Jejunum | stover | Negative | differentiation of cells     | 6.05E-12 | 461  |
|         | Corn   |          |                              |          |      |
| Jejunum | stover | Negative | proliferation of cells       | 6.65E-12 | 704  |
|         | Corn   |          |                              |          |      |
| Jejunum | stover | Negative | necrosis                     | 1.18E-11 | 514  |
|         | Corn   |          |                              |          |      |
| Jejunum | stover | Negative | organization of cytoplasm    | 1.63E-11 | 331  |
|         | Corn   |          |                              |          |      |
| Jejunum | stover | Negative | organization of cytoskeleton | 2.27E-10 | 301  |
|         | Corn   |          |                              |          |      |
| Jejunum | stover | Negative | morphology of cells          | 4.66E-10 | 397  |
|         | Corn   |          |                              |          |      |
| Jejunum | stover | Negative | cell movement                | 5.92E-10 | 428  |
|         | Corn   |          |                              |          |      |
| Jejunum | stover | Negative | transcription                | 3.27E-09 | 401  |
|         | Corn   |          |                              |          |      |
| Jejunum | stover | Negative | transport of molecule        | 4.78E-09 | 333  |
|         | Corn   |          |                              |          |      |
| Jejunum | stover | Negative | quantity of cells            | 8.82E-09 | 359  |
|         | Corn   |          |                              |          |      |
| Jejunum | stover | Negative | expression of RNA            | 1.03E-08 | 424  |
|         | Corn   |          |                              |          |      |
| Jejunum | stover | Negative | microtubule dynamics         | 1.31E-08 | 254  |
|         | Corn   |          |                              |          |      |
| Jejunum | stover | Negative | vasculogenesis               | 1.74E-08 | 170  |
|         | Corn   |          |                              |          |      |
| Jejunum | stover | Negative | transcription of RNA         | 2.14E-08 | 372  |
|         | Corn   |          |                              |          |      |
| Jejunum | stover | Negative | migration of cells           | 6.73E-08 | 377  |
| Jejunum | Corn   | Negative | seizure disorder             | 3.14E-07 | 113  |

|         |        |          |                                          |          |      |
|---------|--------|----------|------------------------------------------|----------|------|
|         | stover |          |                                          |          |      |
|         | Corn   |          |                                          |          |      |
| Jejunum | stover | Negative | proliferation of connective tissue cells | 3.69E-07 | 137  |
|         | Corn   |          |                                          |          |      |
| Jejunum | stover | Negative | angiogenesis                             | 4.85E-07 | 196  |
|         | Corn   |          |                                          |          |      |
| Jejunum | stover | Negative | growth of connective tissue              | 6.15E-07 | 146  |
|         | Corn   |          |                                          |          |      |
| Jejunum | stover | Negative | tumorigenesis of tissue                  | 7.19E-07 | 1516 |
|         | Corn   |          |                                          |          |      |
| Jejunum | stover | Negative | phosphorylation of protein               | 7.21E-07 | 163  |
|         | Corn   |          |                                          |          |      |
| Jejunum | stover | Negative | formation of cellular protrusions        | 7.97E-07 | 194  |
|         | Corn   |          |                                          |          |      |
| Jejunum | stover | Negative | organization of organelle                | 7.99E-07 | 125  |
|         | Corn   |          |                                          |          |      |
| Jejunum | stover | Negative | organization of actin cytoskeleton       | 8.46E-07 | 77   |
|         | Corn   |          |                                          |          |      |
| Jejunum | stover | Negative | growth of organism                       | 1.04E-06 | 181  |
|         | Corn   |          |                                          |          |      |
| Jejunum | stover | Negative | Viral Infection                          | 1.10E-06 | 319  |
|         | Corn   |          |                                          |          |      |
| Jejunum | stover | Negative | abdominal neoplasm                       | 1.19E-06 | 1480 |
|         | Corn   |          |                                          |          |      |
| Jejunum | stover | Negative | transcription of DNA                     | 1.36E-06 | 305  |
|         | Corn   |          |                                          |          |      |
| Jejunum | stover | Negative | seizures                                 | 1.58E-06 | 96   |
|         | Corn   |          |                                          |          |      |
| Jejunum | stover | Negative | cellular homeostasis                     | 1.62E-06 | 302  |
|         | Corn   |          |                                          |          |      |
| Jejunum | stover | Negative | neoplasia of epithelial tissue           | 1.62E-06 | 1489 |
|         | Corn   |          |                                          |          |      |
| Jejunum | stover | Negative | cell death of tumor cell lines           | 2.08E-06 | 302  |
|         | Corn   |          |                                          |          |      |
| Jejunum | stover | Negative | epithelial cancer                        | 3.48E-06 | 1473 |
|         | Corn   |          |                                          |          |      |
| Jejunum | stover | Negative | quantity of blood cells                  | 5.73E-06 | 212  |
|         | Corn   |          |                                          |          |      |
| Jejunum | stover | Negative | growth of embryo                         | 7.12E-06 | 109  |
|         | Corn   |          |                                          |          |      |
| Jejunum | stover | Negative | cell death of connective tissue cells    | 7.84E-06 | 133  |
|         | Corn   |          |                                          |          |      |
| Jejunum | stover | Negative | morphology of cardiovascular system      | 8.63E-06 | 136  |
| Jejunum | Corn   | Negative | proteinuria                              | 1.10E-05 | 45   |

|         |        |          |                                          |          |      |
|---------|--------|----------|------------------------------------------|----------|------|
|         | stover |          |                                          |          |      |
|         | Corn   |          |                                          |          |      |
| Jejunum | stover | Negative | quantity of leukocytes                   | 1.28E-05 | 190  |
|         | Corn   |          |                                          |          |      |
| Jejunum | stover | Negative | fibrogenesis                             | 1.40E-05 | 95   |
|         | Corn   |          |                                          |          |      |
| Jejunum | stover | Negative | formation of filaments                   | 1.72E-05 | 92   |
|         | Corn   |          |                                          |          |      |
| Jejunum | stover | Negative | synthesis of lipid                       | 2.05E-05 | 152  |
|         | Corn   |          |                                          |          |      |
| Jejunum | stover | Negative | organization of filaments                | 2.53E-05 | 53   |
|         | Corn   |          |                                          |          |      |
| Jejunum | stover | Negative | invasion of cells                        | 2.53E-05 | 180  |
|         | Corn   |          |                                          |          |      |
| Jejunum | stover | Negative | abdominal cancer                         | 2.72E-05 | 1451 |
|         | Corn   |          |                                          |          |      |
| Jejunum | stover | Negative | development of epithelial tissue         | 3.01E-05 | 114  |
|         | Corn   |          |                                          |          |      |
| Jejunum | stover | Negative | cell movement of tumor cell lines        | 3.34E-05 | 176  |
|         | Corn   |          |                                          |          |      |
| Jejunum | stover | Negative | morphology of urinary system             | 3.80E-05 | 65   |
|         | Corn   |          |                                          |          |      |
| Jejunum | stover | Negative | endothelial cell development             | 3.84E-05 | 82   |
|         | Corn   |          |                                          |          |      |
| Jejunum | stover | Negative | neuritogenesis                           | 3.92E-05 | 126  |
|         | Corn   |          |                                          |          |      |
| Jejunum | stover | Negative | development of cardiovascular tissue     | 4.00E-05 | 85   |
|         | Corn   |          |                                          |          |      |
| Jejunum | stover | Negative | growth of epithelial tissue              | 4.00E-05 | 144  |
|         | Corn   |          |                                          |          |      |
| Jejunum | stover | Negative | metabolism of carbohydrate               | 4.00E-05 | 133  |
|         | Corn   |          |                                          |          |      |
| Jejunum | stover | Negative | apoptosis of tumor cell lines            | 4.00E-05 | 239  |
|         | Corn   |          |                                          |          |      |
| Jejunum | stover | Negative | neuromuscular disease                    | 4.04E-05 | 181  |
|         | Corn   |          |                                          |          |      |
| Jejunum | stover | Negative | abnormal morphology of urinary system    | 4.82E-05 | 62   |
|         | Corn   |          |                                          |          |      |
| Jejunum | stover | Negative | cell survival                            | 6.65E-05 | 269  |
|         | Corn   |          |                                          |          |      |
| Jejunum | stover | Negative | Movement Disorders                       | 6.93E-05 | 211  |
|         | Corn   |          |                                          |          |      |
| Jejunum | stover | Negative | protein kinase cascade                   | 7.14E-05 | 94   |
| Jejunum | Corn   | Negative | formation of plasma membrane projections | 7.64E-05 | 127  |

|         |        |          |                                              |          |      |
|---------|--------|----------|----------------------------------------------|----------|------|
|         | stover |          |                                              |          |      |
|         | Corn   |          |                                              |          |      |
| Jejunum | stover | Negative | morphology of kidney                         | 7.64E-05 | 60   |
|         | Corn   |          |                                              |          |      |
| Jejunum | stover | Negative | assembly of protein-protein complex          | 7.69E-05 | 48   |
|         | Corn   |          |                                              |          |      |
| Jejunum | stover | Negative | formation of cytoskeleton                    | 7.99E-05 | 85   |
|         | Corn   |          |                                              |          |      |
| Jejunum | stover | Negative | development of endothelial tissue            | 8.09E-05 | 83   |
|         | Corn   |          |                                              |          |      |
| Jejunum | stover | Negative | concentration of lipid                       | 8.77E-05 | 166  |
|         | Corn   |          |                                              |          |      |
| Jejunum | stover | Negative | Growth Failure                               | 8.77E-05 | 127  |
|         | Corn   |          |                                              |          |      |
| Jejunum | stover | Negative | abnormal morphology of cardiovascular system | 9.74E-05 | 121  |
|         | Corn   |          |                                              |          |      |
| Jejunum | stover | Negative | abnormal morphology of kidney                | 1.00E-04 | 57   |
|         | Corn   |          |                                              |          |      |
| Jejunum | stover | Negative | differentiation of epithelial tissue         | 1.25E-04 | 81   |
|         | Corn   |          |                                              |          |      |
| Jejunum | stover | Negative | development of body trunk                    | 1.38E-04 | 219  |
|         | Corn   |          |                                              |          |      |
| Jejunum | stover | Negative | digestive organ tumor                        | 1.44E-04 | 1268 |
|         | Corn   |          |                                              |          |      |
| Jejunum | stover | Negative | ion homeostasis of cells                     | 1.49E-04 | 118  |
|         | Corn   |          |                                              |          |      |
| Jejunum | stover | Negative | digestive system cancer                      | 1.68E-04 | 1256 |
|         | Corn   |          |                                              |          |      |
| Jejunum | stover | Negative | homing of cells                              | 1.68E-04 | 118  |
|         | Corn   |          |                                              |          |      |
| Jejunum | stover | Negative | development of cytoplasm                     | 1.71E-04 | 100  |
|         | Corn   |          |                                              |          |      |
| Jejunum | stover | Negative | autosomal recessive disease                  | 1.75E-04 | 184  |
|         | Corn   |          |                                              |          |      |
| Jejunum | stover | Negative | proliferation of endothelial cells           | 1.82E-04 | 71   |
|         | Corn   |          |                                              |          |      |
| Jejunum | stover | Negative | formation of actin stress fibers             | 1.85E-04 | 57   |
|         | Corn   |          |                                              |          |      |
| Jejunum | stover | Negative | morphology of heart                          | 1.93E-04 | 89   |
|         | Corn   |          |                                              |          |      |
| Jejunum | stover | Negative | apoptosis of fibroblast cell lines           | 2.11E-04 | 74   |
|         | Corn   |          |                                              |          |      |
| Jejunum | stover | Negative | degeneration of nervous system               | 2.11E-04 | 66   |
| Jejunum | Corn   | Negative | differentiation of connective tissue cells   | 2.26E-04 | 133  |

|         |        |          |                                              |          |     |
|---------|--------|----------|----------------------------------------------|----------|-----|
|         | stover |          |                                              |          |     |
|         | Corn   |          |                                              |          |     |
| Jejunum | stover | Negative | morphology of nervous system                 | 2.95E-04 | 158 |
|         | Corn   |          |                                              |          |     |
| Jejunum | stover | Negative | migration of blood cells                     | 2.95E-04 | 174 |
|         | Corn   |          |                                              |          |     |
| Jejunum | stover | Negative | abnormal morphology of thoracic cavity       | 3.06E-04 | 122 |
|         | Corn   |          |                                              |          |     |
| Jejunum | stover | Negative | chemotaxis of cells                          | 3.06E-04 | 111 |
|         | Corn   |          |                                              |          |     |
| Jejunum | stover | Negative | cell viability                               | 3.06E-04 | 248 |
|         | Corn   |          |                                              |          |     |
| Jejunum | stover | Negative | cell death of fibroblast cell lines          | 3.40E-04 | 92  |
|         | Corn   |          |                                              |          |     |
| Jejunum | stover | Negative | cell movement of endothelial cells           | 3.49E-04 | 78  |
|         | Corn   |          |                                              |          |     |
| Jejunum | stover | Negative | transactivation                              | 3.65E-04 | 120 |
|         | Corn   |          |                                              |          |     |
| Jejunum | stover | Negative | leukocyte migration                          | 3.79E-04 | 173 |
|         | Corn   |          |                                              |          |     |
| Jejunum | stover | Negative | epilepsy                                     | 3.84E-04 | 69  |
|         | Corn   |          |                                              |          |     |
| Jejunum | stover | Negative | quantity of metal                            | 3.93E-04 | 105 |
|         | Corn   |          |                                              |          |     |
| Jejunum | stover | Negative | homing                                       | 3.93E-04 | 119 |
|         | Corn   |          |                                              |          |     |
| Jejunum | stover | Negative | endocytosis                                  | 4.09E-04 | 76  |
|         | Corn   |          |                                              |          |     |
| Jejunum | stover | Negative | exocytosis                                   | 4.18E-04 | 46  |
|         | Corn   |          |                                              |          |     |
| Jejunum | stover | Negative | Neurodegeneration                            | 4.45E-04 | 69  |
|         | Corn   |          |                                              |          |     |
| Jejunum | stover | Negative | differentiation of connective tissue         | 4.59E-04 | 147 |
|         | Corn   |          |                                              |          |     |
| Jejunum | stover | Negative | migration of connective tissue cells         | 4.66E-04 | 44  |
|         | Corn   |          |                                              |          |     |
| Jejunum | stover | Negative | morphology of head                           | 4.72E-04 | 173 |
|         | Corn   |          |                                              |          |     |
| Jejunum | stover | Negative | congenital anomaly of musculoskeletal system | 4.72E-04 | 148 |
|         | Corn   |          |                                              |          |     |
| Jejunum | stover | Negative | formation of actin filaments                 | 4.72E-04 | 68  |
|         | Corn   |          |                                              |          |     |
| Jejunum | stover | Negative | chemotaxis                                   | 5.05E-04 | 113 |
| Jejunum | Corn   | Negative | invasion of tumor cell lines                 | 5.05E-04 | 135 |

|         |        |          |                                         |          |     |
|---------|--------|----------|-----------------------------------------|----------|-----|
|         | stover |          |                                         |          |     |
|         | Corn   |          |                                         |          |     |
| Jejunum | stover | Negative | ubiquitination                          | 5.05E-04 | 74  |
|         | Corn   |          |                                         |          |     |
| Jejunum | stover | Negative | cell death of macrophages               | 5.05E-04 | 33  |
|         | Corn   |          |                                         |          |     |
| Jejunum | stover | Negative | urination disorder                      | 5.05E-04 | 65  |
|         | Corn   |          |                                         |          |     |
| Jejunum | stover | Negative | ubiquitination of protein               | 5.05E-04 | 73  |
|         | Corn   |          |                                         |          |     |
| Jejunum | stover | Negative | morphology of body cavity               | 5.11E-04 | 228 |
|         | Corn   |          |                                         |          |     |
| Jejunum | stover | Negative | synthesis of DNA                        | 5.32E-04 | 89  |
|         | Corn   |          |                                         |          |     |
| Jejunum | stover | Negative | cell death of antigen presenting cells  | 5.32E-04 | 40  |
|         | Corn   |          |                                         |          |     |
| Jejunum | stover | Negative | function of cardiovascular system       | 5.44E-04 | 80  |
|         | Corn   |          |                                         |          |     |
| Jejunum | stover | Negative | transmigration of cells                 | 5.51E-04 | 39  |
|         | Corn   |          |                                         |          |     |
| Jejunum | stover | Negative | cell death of myeloid cells             | 5.56E-04 | 50  |
|         | Corn   |          |                                         |          |     |
| Jejunum | stover | Negative | learning                                | 5.57E-04 | 89  |
|         | Corn   |          |                                         |          |     |
| Jejunum | stover | Negative | migration of tumor cell lines           | 5.75E-04 | 142 |
|         | Corn   |          |                                         |          |     |
| Jejunum | stover | Negative | quantity of lymphocytes                 | 6.05E-04 | 142 |
|         | Corn   |          |                                         |          |     |
| Jejunum | stover | Negative | proliferation of neuronal cells         | 6.45E-04 | 118 |
|         | Corn   |          |                                         |          |     |
| Jejunum | stover | Negative | abnormal morphology of abdomen          | 6.49E-04 | 172 |
|         | Corn   |          |                                         |          |     |
| Jejunum | stover | Negative | quantity of lymphatic system component  | 6.95E-04 | 81  |
|         | Corn   |          |                                         |          |     |
| Jejunum | stover | Negative | cell death of phagocytes                | 7.30E-04 | 49  |
|         | Corn   |          |                                         |          |     |
| Jejunum | stover | Negative | quantity of carbohydrate                | 7.56E-04 | 107 |
|         | Corn   |          |                                         |          |     |
| Jejunum | stover | Negative | cognition                               | 8.28E-04 | 95  |
|         | Corn   |          |                                         |          |     |
| Jejunum | stover | Negative | proliferation of fibroblasts            | 8.40E-04 | 76  |
|         | Corn   |          |                                         |          |     |
| Jejunum | stover | Negative | proliferation of lymphatic system cells | 8.40E-04 | 47  |
| Jejunum | Corn   | Negative | quantity of mononuclear leukocytes      | 8.92E-04 | 146 |

|         |        |          |                                        |          |     |
|---------|--------|----------|----------------------------------------|----------|-----|
|         | stover |          |                                        |          |     |
|         | Corn   |          |                                        |          |     |
| Jejunum | stover | Negative | morphology of connective tissue        | 8.92E-04 | 96  |
|         | Corn   |          |                                        |          |     |
| Jejunum | stover | Negative | infection of cells                     | 9.25E-04 | 157 |
|         | Corn   |          |                                        |          |     |
| Jejunum | stover | Negative | binding of DNA                         | 9.35E-04 | 107 |
|         | Corn   |          |                                        |          |     |
| Jejunum | stover | Negative | function of blood cells                | 9.35E-04 | 119 |
|         | Corn   |          |                                        |          |     |
| Jejunum | stover | Negative | development of vasculature             | 9.53E-04 | 88  |
|         | Corn   |          |                                        |          |     |
| Jejunum | stover | Negative | proliferation of embryonic cells       | 9.53E-04 | 56  |
|         | Corn   |          |                                        |          |     |
| Jejunum | stover | Negative | migration of endothelial cells         | 9.72E-04 | 71  |
|         | Corn   |          |                                        |          |     |
| Jejunum | stover | Negative | transport of protein                   | 9.72E-04 | 66  |
|         | Corn   |          |                                        |          |     |
| Jejunum | stover | Negative | transactivation of RNA                 | 9.72E-04 | 111 |
|         | Corn   |          |                                        |          |     |
| Jejunum | stover | Negative | quantity of lymphoid organ             | 1.04E-03 | 67  |
|         | Corn   |          |                                        |          |     |
| Jejunum | stover | Negative | disorder of basal ganglia              | 1.09E-03 | 151 |
|         | Corn   |          |                                        |          |     |
| Jejunum | stover | Negative | concentration of acylglycerol          | 1.09E-03 | 72  |
|         | Corn   |          |                                        |          |     |
| Jejunum | stover | Negative | activation of DNA endogenous promoter  | 1.09E-03 | 228 |
|         | Corn   |          |                                        |          |     |
| Jejunum | stover | Negative | behavior                               | 1.10E-03 | 190 |
|         | Corn   |          |                                        |          |     |
| Jejunum | stover | Negative | dyskinesia                             | 1.10E-03 | 124 |
|         | Corn   |          |                                        |          |     |
| Jejunum | stover | Negative | S phase                                | 1.10E-03 | 58  |
|         | Corn   |          |                                        |          |     |
| Jejunum | stover | Negative | metabolism of fructose-1,6-diphosphate | 1.11E-03 | 6   |
|         | Corn   |          |                                        |          |     |
| Jejunum | stover | Negative | epileptic seizure                      | 1.11E-03 | 40  |
|         | Corn   |          |                                        |          |     |
| Jejunum | stover | Negative | quantity of metal ion                  | 1.16E-03 | 92  |
|         | Corn   |          |                                        |          |     |
| Jejunum | stover | Negative | abnormal morphology of nervous system  | 1.28E-03 | 143 |
|         | Corn   |          |                                        |          |     |
| Jejunum | stover | Negative | growth of vessel                       | 1.30E-03 | 29  |
| Jejunum | Corn   | Negative | infection of kidney cell lines         | 1.36E-03 | 62  |

|         |        |          |                                           |          |     |
|---------|--------|----------|-------------------------------------------|----------|-----|
|         | stover |          |                                           |          |     |
|         | Corn   |          |                                           |          |     |
| Jejunum | stover | Negative | proliferation of tumor cell lines         | 1.36E-03 | 284 |
|         | Corn   |          |                                           |          |     |
| Jejunum | stover | Negative | proliferation of fibroblast cell lines    | 1.42E-03 | 88  |
|         | Corn   |          |                                           |          |     |
| Jejunum | stover | Negative | outgrowth of neurons                      | 1.48E-03 | 85  |
|         | Corn   |          |                                           |          |     |
| Jejunum | stover | Negative | accumulation of blood cells               | 1.49E-03 | 61  |
|         | Corn   |          |                                           |          |     |
| Jejunum | stover | Negative | activation of antigen presenting cells    | 1.55E-03 | 68  |
|         | Corn   |          |                                           |          |     |
| Jejunum | stover | Negative | abnormal morphology of body cavity        | 1.55E-03 | 215 |
|         | Corn   |          |                                           |          |     |
| Jejunum | stover | Negative | quantity of cellular protrusions          | 1.56E-03 | 38  |
|         | Corn   |          |                                           |          |     |
| Jejunum | stover | Negative | degeneration of cells                     | 1.58E-03 | 73  |
|         | Corn   |          |                                           |          |     |
| Jejunum | stover | Negative | synthesis of carbohydrate                 | 1.58E-03 | 88  |
|         | Corn   |          |                                           |          |     |
| Jejunum | stover | Negative | skin abnormality                          | 1.64E-03 | 51  |
|         | Corn   |          |                                           |          |     |
| Jejunum | stover | Negative | outgrowth of neurites                     | 1.70E-03 | 84  |
|         | Corn   |          |                                           |          |     |
| Jejunum | stover | Negative | quantity of T lymphocytes                 | 1.71E-03 | 108 |
|         | Corn   |          |                                           |          |     |
| Jejunum | stover | Negative | influx of Ca <sup>2+</sup>                | 1.71E-03 | 43  |
|         | Corn   |          |                                           |          |     |
| Jejunum | stover | Negative | influx of inorganic cation                | 1.76E-03 | 44  |
|         | Corn   |          |                                           |          |     |
| Jejunum | stover | Negative | proliferation of hematopoietic cell lines | 1.76E-03 | 50  |
|         | Corn   |          |                                           |          |     |
| Jejunum | stover | Negative | degeneration of neurons                   | 1.76E-03 | 53  |
|         | Corn   |          |                                           |          |     |
| Jejunum | stover | Negative | differentiation of epithelial cells       | 1.76E-03 | 67  |
|         | Corn   |          |                                           |          |     |
| Jejunum | stover | Negative | abnormal morphology of heart              | 1.76E-03 | 80  |
|         | Corn   |          |                                           |          |     |
| Jejunum | stover | Negative | abnormal morphology of head               | 1.77E-03 | 161 |
|         | Corn   |          |                                           |          |     |
| Jejunum | stover | Negative | development of lymphatic system           | 1.77E-03 | 75  |
|         | Corn   |          |                                           |          |     |
| Jejunum | stover | Negative | development of neurons                    | 1.84E-03 | 152 |
| Jejunum | Corn   | Negative | abnormal morphology of thoracic vertebra  | 1.84E-03 | 12  |



|         |        |          |                                           |          |     |
|---------|--------|----------|-------------------------------------------|----------|-----|
|         | stover |          |                                           |          |     |
|         | Corn   |          |                                           |          |     |
| Jejunum | stover | Negative | abnormal morphology of Schwann cells      | 1.87E-03 | 9   |
|         | Corn   |          |                                           |          |     |
| Jejunum | stover | Negative | growth of lymphatic system component      | 1.87E-03 | 44  |
|         | Corn   |          |                                           |          |     |
| Jejunum | stover | Negative | morphology of right ventricle             | 1.92E-03 | 17  |
|         | Corn   |          |                                           |          |     |
| Jejunum | stover | Negative | morphology of fibroblast cell lines       | 2.06E-03 | 23  |
|         | Corn   |          |                                           |          |     |
| Jejunum | stover | Negative | necrosis of epithelial tissue             | 2.20E-03 | 117 |
|         | Corn   |          |                                           |          |     |
| Jejunum | stover | Negative | quantity of Ca <sup>2+</sup>              | 2.24E-03 | 84  |
|         | Corn   |          |                                           |          |     |
| Jejunum | stover | Negative | quantity of phagocytes                    | 2.26E-03 | 87  |
|         | Corn   |          |                                           |          |     |
| Jejunum | stover | Negative | abnormal morphology of cells              | 2.52E-03 | 234 |
|         | Corn   |          |                                           |          |     |
| Jejunum | stover | Negative | size of body                              | 2.63E-03 | 163 |
|         | Corn   |          |                                           |          |     |
| Jejunum | stover | Negative | abnormal morphology of respiratory system | 2.63E-03 | 65  |
|         | Corn   |          |                                           |          |     |
| Jejunum | stover | Negative | concentration of triacylglycerol          | 2.63E-03 | 65  |
|         | Corn   |          |                                           |          |     |
| Jejunum | stover | Negative | migration of fibroblasts                  | 2.63E-03 | 34  |
|         | Corn   |          |                                           |          |     |
| Jejunum | stover | Negative | growth of embryonic tissue                | 2.72E-03 | 59  |
|         | Corn   |          |                                           |          |     |
| Jejunum | stover | Negative | metabolism of monosaccharide              | 2.76E-03 | 30  |
|         | Corn   |          |                                           |          |     |
| Jejunum | stover | Negative | cellular degradation                      | 2.86E-03 | 55  |
|         | Corn   |          |                                           |          |     |
| Jejunum | stover | Negative | generation of superoxide                  | 2.86E-03 | 18  |
|         | Corn   |          |                                           |          |     |
| Jejunum | stover | Negative | function of leukocytes                    | 2.86E-03 | 107 |
|         | Corn   |          |                                           |          |     |
| Jejunum | stover | Negative | homeostasis of ion                        | 2.86E-03 | 52  |
|         | Corn   |          |                                           |          |     |
| Jejunum | stover | Negative | cell movement of connective tissue cells  | 2.86E-03 | 49  |
|         | Corn   |          |                                           |          |     |
| Jejunum | stover | Negative | infection of embryonic cell lines         | 2.86E-03 | 59  |
|         | Corn   |          |                                           |          |     |
| Jejunum | stover | Negative | infection of epithelial cell lines        | 2.86E-03 | 59  |
| Jejunum | Corn   | Negative | inflammatory response                     | 2.87E-03 | 150 |

|         |        |          |                                           |          |     |
|---------|--------|----------|-------------------------------------------|----------|-----|
|         | stover |          |                                           |          |     |
|         | Corn   |          |                                           |          |     |
| Jejunum | stover | Negative | abnormal morphology of renal tubule       | 2.88E-03 | 27  |
|         | Corn   |          |                                           |          |     |
| Jejunum | stover | Negative | proliferative vitreoretinopathy           | 3.00E-03 | 6   |
|         | Corn   |          |                                           |          |     |
| Jejunum | stover | Negative | development of lymphatic system component | 3.16E-03 | 65  |
|         | Corn   |          |                                           |          |     |
| Jejunum | stover | Negative | dysgenesis                                | 3.32E-03 | 107 |
|         | Corn   |          |                                           |          |     |
| Jejunum | stover | Negative | oligomerization of protein                | 3.34E-03 | 52  |
|         | Corn   |          |                                           |          |     |
| Jejunum | stover | Negative | extension of cellular protrusions         | 3.34E-03 | 46  |
|         | Corn   |          |                                           |          |     |
| Jejunum | stover | Negative | neurological signs                        | 3.34E-03 | 127 |
|         | Corn   |          |                                           |          |     |
| Jejunum | stover | Negative | formation of cells                        | 3.35E-03 | 185 |
|         | Corn   |          |                                           |          |     |
| Jejunum | stover | Negative | apoptosis of blood cells                  | 3.35E-03 | 99  |
|         | Corn   |          |                                           |          |     |
| Jejunum | stover | Negative | formation of filopodia                    | 3.44E-03 | 38  |
|         | Corn   |          |                                           |          |     |
| Jejunum | stover | Negative | formation of vascular lesion              | 3.71E-03 | 28  |
|         | Corn   |          |                                           |          |     |
| Jejunum | stover | Negative | Huntington's Disease                      | 3.74E-03 | 113 |
|         | Corn   |          |                                           |          |     |
| Jejunum | stover | Negative | quantity of granulocytes                  | 3.74E-03 | 66  |
|         | Corn   |          |                                           |          |     |
| Jejunum | stover | Negative | abnormal morphology of bone               | 3.74E-03 | 88  |
|         | Corn   |          |                                           |          |     |
| Jejunum | stover | Negative | neuronal cell death                       | 3.74E-03 | 132 |
|         | Corn   |          |                                           |          |     |
| Jejunum | stover | Negative | quantity of connective tissue             | 3.74E-03 | 118 |
|         | Corn   |          |                                           |          |     |
| Jejunum | stover | Negative | development of connective tissue          | 3.80E-03 | 76  |
|         | Corn   |          |                                           |          |     |
| Jejunum | stover | Negative | cell death of blood cells                 | 3.86E-03 | 134 |
|         | Corn   |          |                                           |          |     |
| Jejunum | stover | Negative | abnormal morphology of right ventricle    | 3.93E-03 | 15  |
|         | Corn   |          |                                           |          |     |
| Jejunum | stover | Negative | formation of lung                         | 3.98E-03 | 63  |
|         | Corn   |          |                                           |          |     |
| Jejunum | stover | Negative | concentration of fatty acid               | 4.04E-03 | 59  |
| Jejunum | Corn   | Negative | apoptosis of myeloid cells                | 4.10E-03 | 42  |

|         |                |          |                                               |          |     |
|---------|----------------|----------|-----------------------------------------------|----------|-----|
|         | stover<br>Corn |          |                                               |          |     |
| Jejunum | stover<br>Corn | Negative | apoptosis of phagocytes                       | 4.10E-03 | 42  |
| Jejunum | stover<br>Corn | Negative | quantity of myeloid cells                     | 4.14E-03 | 73  |
| Jejunum | stover<br>Corn | Negative | uptake of monosaccharide                      | 4.15E-03 | 57  |
| Jejunum | stover<br>Corn | Negative | MAPKKK cascade                                | 4.19E-03 | 45  |
| Jejunum | stover<br>Corn | Negative | fusion of cellular membrane                   | 4.39E-03 | 17  |
| Jejunum | stover<br>Corn | Negative | interphase                                    | 4.40E-03 | 127 |
| Jejunum | stover<br>Corn | Negative | formation of testis                           | 4.46E-03 | 29  |
| Jejunum | stover<br>Corn | Negative | growth of muscle tissue                       | 4.46E-03 | 76  |
| Jejunum | stover<br>Corn | Negative | outgrowth of cells                            | 4.46E-03 | 87  |
| Jejunum | stover<br>Corn | Negative | differentiation of muscle                     | 4.46E-03 | 63  |
| Jejunum | stover<br>Corn | Negative | chemotaxis of myeloid cells                   | 4.71E-03 | 61  |
| Jejunum | stover<br>Corn | Negative | congenital anomaly of skin                    | 4.72E-03 | 40  |
| Jejunum | stover<br>Corn | Negative | accumulation of cells                         | 4.77E-03 | 72  |
| Jejunum | stover<br>Corn | Negative | quantity of thymus gland                      | 4.86E-03 | 50  |
| Jejunum | stover<br>Corn | Negative | differentiation of embryonic cells            | 4.88E-03 | 49  |
| Jejunum | stover<br>Corn | Negative | neurodegeneration of axons                    | 4.95E-03 | 22  |
| Jejunum | stover<br>Corn | Negative | neurodegeneration of neurites                 | 4.99E-03 | 23  |
| Jejunum | stover<br>Corn | Negative | formation of vessel component                 | 5.21E-03 | 19  |
| Jejunum | stover<br>Corn | Negative | cell viability of tumor cell lines            | 5.24E-03 | 148 |
| Jejunum | stover<br>Corn | Negative | cell movement of leukemia cell lines          | 5.42E-03 | 32  |
| Jejunum | stover         | Negative | development of body axis                      | 5.46E-03 | 195 |
| Jejunum | Corn           | Negative | proliferation of vascular smooth muscle cells | 5.51E-03 | 35  |

|         |        |          |                                               |          |     |
|---------|--------|----------|-----------------------------------------------|----------|-----|
|         | stover |          |                                               |          |     |
|         | Corn   |          |                                               |          |     |
| Jejunum | stover | Negative | iris coloboma                                 | 5.51E-03 | 5   |
|         | Corn   |          |                                               |          |     |
| Jejunum | stover | Negative | metabolism of glucose-6-phosphate             | 5.51E-03 | 5   |
|         | Corn   |          |                                               |          |     |
| Jejunum | stover | Negative | abnormal morphology of embryonic tissue       | 5.55E-03 | 107 |
|         | Corn   |          |                                               |          |     |
| Jejunum | stover | Negative | hypoplasia of kidney                          | 5.63E-03 | 16  |
|         | Corn   |          |                                               |          |     |
| Jejunum | stover | Negative | homo-oligomerization of protein               | 5.64E-03 | 31  |
|         | Corn   |          |                                               |          |     |
| Jejunum | stover | Negative | proliferation of muscle cells                 | 5.74E-03 | 75  |
|         | Corn   |          |                                               |          |     |
| Jejunum | stover | Negative | proliferation of leukocyte cell lines         | 5.74E-03 | 44  |
|         | Corn   |          |                                               |          |     |
| Jejunum | stover | Negative | adhesion of immune cells                      | 5.80E-03 | 71  |
|         | Corn   |          |                                               |          |     |
| Jejunum | stover | Negative | accumulation of leukocytes                    | 5.86E-03 | 56  |
|         | Corn   |          |                                               |          |     |
| Jejunum | stover | Negative | abnormal morphology of membrane tissue        | 5.86E-03 | 38  |
|         | Corn   |          |                                               |          |     |
| Jejunum | stover | Negative | organization of fibrils                       | 5.86E-03 | 15  |
|         | Corn   |          |                                               |          |     |
| Jejunum | stover | Negative | apoptosis of antigen presenting cells         | 5.86E-03 | 32  |
|         | Corn   |          |                                               |          |     |
| Jejunum | stover | Negative | cell death of muscle                          | 5.90E-03 | 70  |
|         | Corn   |          |                                               |          |     |
| Jejunum | stover | Negative | glycolysis of cells                           | 5.90E-03 | 27  |
|         | Corn   |          |                                               |          |     |
| Jejunum | stover | Negative | Hypoplasia                                    | 6.00E-03 | 99  |
|         | Corn   |          |                                               |          |     |
| Jejunum | stover | Negative | perinatal death                               | 6.00E-03 | 115 |
|         | Corn   |          |                                               |          |     |
| Jejunum | stover | Negative | morphology of heart ventricle                 | 6.08E-03 | 42  |
|         | Corn   |          |                                               |          |     |
| Jejunum | stover | Negative | replication of virus                          | 6.24E-03 | 109 |
|         | Corn   |          |                                               |          |     |
| Jejunum | stover | Negative | growth of plasma membrane projections         | 6.24E-03 | 92  |
|         | Corn   |          |                                               |          |     |
| Jejunum | stover | Negative | proliferation of adipoblasts                  | 6.24E-03 | 6   |
|         | Corn   |          |                                               |          |     |
| Jejunum | stover | Negative | multiple congenital anomalies                 | 6.24E-03 | 84  |
| Jejunum | Corn   | Negative | proliferation of central nervous system cells | 6.26E-03 | 34  |

|         |        |          |                                            |          |     |
|---------|--------|----------|--------------------------------------------|----------|-----|
|         | stover |          |                                            |          |     |
|         | Corn   |          |                                            |          |     |
| Jejunum | stover | Negative | morphology of bone                         | 6.29E-03 | 89  |
|         | Corn   |          |                                            |          |     |
| Jejunum | stover | Negative | cell death of cervical cancer cell lines   | 6.32E-03 | 71  |
|         | Corn   |          |                                            |          |     |
| Jejunum | stover | Negative | quantity of thymocytes                     | 6.34E-03 | 49  |
|         | Corn   |          |                                            |          |     |
| Jejunum | stover | Negative | cell movement of leukocytes                | 6.67E-03 | 145 |
|         | Corn   |          |                                            |          |     |
| Jejunum | stover | Negative | cell movement of myeloid cells             | 6.68E-03 | 105 |
|         | Corn   |          |                                            |          |     |
| Jejunum | stover | Negative | secretion of molecule                      | 6.70E-03 | 107 |
|         | Corn   |          |                                            |          |     |
| Jejunum | stover | Negative | growth of neurites                         | 6.73E-03 | 91  |
|         | Corn   |          |                                            |          |     |
| Jejunum | stover | Negative | organization of actin filaments            | 7.04E-03 | 25  |
|         | Corn   |          |                                            |          |     |
| Jejunum | stover | Negative | homeostasis of inorganic cation            | 7.11E-03 | 41  |
|         | Corn   |          |                                            |          |     |
| Jejunum | stover | Negative | morphology of central nervous system       | 7.19E-03 | 100 |
|         | Corn   |          |                                            |          |     |
| Jejunum | stover | Negative | cell death of central nervous system cells | 7.31E-03 | 60  |
|         | Corn   |          |                                            |          |     |
| Jejunum | stover | Negative | size of cells                              | 7.36E-03 | 85  |
|         | Corn   |          |                                            |          |     |
| Jejunum | stover | Negative | quantity of cytokine                       | 7.47E-03 | 53  |
|         | Corn   |          |                                            |          |     |
| Jejunum | stover | Negative | vascularization of body region             | 7.53E-03 | 31  |
|         | Corn   |          |                                            |          |     |
| Jejunum | stover | Negative | benign neoplasia                           | 7.53E-03 | 172 |
|         | Corn   |          |                                            |          |     |
| Jejunum | stover | Negative | branching of cells                         | 7.58E-03 | 74  |
|         | Corn   |          |                                            |          |     |
| Jejunum | stover | Negative | morphogenesis of neurons                   | 7.59E-03 | 84  |
|         | Corn   |          |                                            |          |     |
| Jejunum | stover | Negative | apoptosis of cervical cancer cell lines    | 7.60E-03 | 58  |
|         | Corn   |          |                                            |          |     |
| Jejunum | stover | Negative | anxiety                                    | 7.63E-03 | 41  |
|         | Corn   |          |                                            |          |     |
| Jejunum | stover | Negative | function of muscle                         | 7.69E-03 | 70  |
|         | Corn   |          |                                            |          |     |
| Jejunum | stover | Negative | activation of macrophages                  | 7.74E-03 | 50  |
| Jejunum | Corn   | Negative | formation of thymus gland                  | 7.88E-03 | 36  |

|         |        |          |                                            |          |     |
|---------|--------|----------|--------------------------------------------|----------|-----|
|         | stover |          |                                            |          |     |
|         | Corn   |          |                                            |          |     |
| Jejunum | stover | Negative | quantity of kidney                         | 7.88E-03 | 16  |
|         | Corn   |          |                                            |          |     |
| Jejunum | stover | Negative | necrosis of muscle                         | 7.91E-03 | 69  |
|         | Corn   |          |                                            |          |     |
| Jejunum | stover | Negative | proliferation of epithelial cells          | 7.92E-03 | 96  |
|         | Corn   |          |                                            |          |     |
| Jejunum | stover | Negative | proliferation of mitochondria              | 8.04E-03 | 4   |
|         | Corn   |          |                                            |          |     |
| Jejunum | stover | Negative | cell movement of phagocytes                | 8.18E-03 | 106 |
|         | Corn   |          |                                            |          |     |
| Jejunum | stover | Negative | homeostasis of metal ion                   | 8.18E-03 | 40  |
|         | Corn   |          |                                            |          |     |
| Jejunum | stover | Negative | activation of central nervous system cells | 8.18E-03 | 20  |
|         | Corn   |          |                                            |          |     |
| Jejunum | stover | Negative | fatty acid metabolism                      | 8.51E-03 | 115 |
|         | Corn   |          |                                            |          |     |
| Jejunum | stover | Negative | cell cycle progression                     | 8.80E-03 | 192 |
|         | Corn   |          |                                            |          |     |
| Jejunum | stover | Negative | contractility of muscle                    | 9.01E-03 | 41  |
|         | Corn   |          |                                            |          |     |
| Jejunum | stover | Negative | oxidation of D-glucose                     | 9.05E-03 | 14  |
|         | Corn   |          |                                            |          |     |
| Jejunum | stover | Negative | atherosclerotic lesion                     | 9.05E-03 | 34  |
|         | Corn   |          |                                            |          |     |
| Jejunum | stover | Negative | formation of neointima                     | 9.05E-03 | 18  |
|         | Corn   |          |                                            |          |     |
| Jejunum | stover | Negative | chemotaxis of phagocytes                   | 9.24E-03 | 60  |
|         | Corn   |          |                                            |          |     |
| Jejunum | stover | Negative | growth of kidney                           | 9.57E-03 | 22  |
|         | Corn   |          |                                            |          |     |
| Jejunum | stover | Negative | atherogenesis                              | 9.58E-03 | 20  |
|         | Corn   |          |                                            |          |     |
| Jejunum | stover | Negative | cell death of immune cells                 | 9.66E-03 | 125 |
|         | Corn   |          |                                            |          |     |
| Jejunum | stover | Negative | flux of Ca <sup>2+</sup>                   | 9.77E-03 | 58  |
|         | Corn   |          |                                            |          |     |
| Jejunum | stover | Negative | size of embryo                             | 9.81E-03 | 71  |
|         | Corn   |          |                                            |          |     |
| Jejunum | stover | Negative | chemotaxis of antigen presenting cells     | 9.97E-03 | 34  |
|         | Corn   |          |                                            |          |     |
| Jejunum | stover | Negative | apoptosis of macrophages                   | 9.97E-03 | 25  |
| Jejunum | Corn   | Negative | apoptosis of leukocytes                    | 1.01E-02 | 89  |

|         |        |          |                                      |          |     |
|---------|--------|----------|--------------------------------------|----------|-----|
|         | stover |          |                                      |          |     |
|         | Corn   |          |                                      |          |     |
| Jejunum | stover | Negative | uptake of carbohydrate               | 1.01E-02 | 59  |
|         | Corn   |          |                                      |          |     |
| Jejunum | stover | Negative | hypersensitive reaction              | 1.01E-02 | 84  |
|         | Corn   |          |                                      |          |     |
| Jejunum | stover | Negative | flux of inorganic cation             | 1.01E-02 | 61  |
|         | Corn   |          |                                      |          |     |
| Jejunum | stover | Negative | morphology of neuroglia              | 1.01E-02 | 27  |
|         | Corn   |          |                                      |          |     |
| Jejunum | stover | Negative | concentration of Ca <sup>2+</sup>    | 1.01E-02 | 29  |
|         | Corn   |          |                                      |          |     |
| Jejunum | stover | Negative | proliferation of smooth muscle cells | 1.02E-02 | 58  |
|         | Corn   |          |                                      |          |     |
| Jejunum | stover | Negative | infection by HIV-1                   | 1.02E-02 | 116 |
|         | Corn   |          |                                      |          |     |
| Jejunum | stover | Negative | hypoplasia of organ                  | 1.02E-02 | 87  |
|         | Corn   |          |                                      |          |     |
| Jejunum | stover | Negative | morphogenesis of neurites            | 1.02E-02 | 82  |
|         | Corn   |          |                                      |          |     |
| Jejunum | stover | Negative | invasion of carcinoma cell lines     | 1.03E-02 | 42  |
|         | Corn   |          |                                      |          |     |
| Jejunum | stover | Negative | cell death of muscle cells           | 1.04E-02 | 67  |
|         | Corn   |          |                                      |          |     |
| Jejunum | stover | Negative | trafficking of cells                 | 1.07E-02 | 19  |
|         | Corn   |          |                                      |          |     |
| Jejunum | stover | Negative | abnormal morphology of neuroglia     | 1.08E-02 | 21  |
|         | Corn   |          |                                      |          |     |
| Jejunum | stover | Negative | oxidation of palmitic acid           | 1.09E-02 | 14  |
|         | Corn   |          |                                      |          |     |
| Jejunum | stover | Negative | resorption of bone                   | 1.10E-02 | 36  |
|         | Corn   |          |                                      |          |     |
| Jejunum | stover | Negative | sprouting                            | 1.10E-02 | 76  |
|         | Corn   |          |                                      |          |     |
| Jejunum | stover | Negative | juvenile dermatomyositis             | 1.10E-02 | 16  |
|         | Corn   |          |                                      |          |     |
| Jejunum | stover | Negative | uterine serous papillary cancer      | 1.11E-02 | 48  |
|         | Corn   |          |                                      |          |     |
| Jejunum | stover | Negative | respiratory system development       | 1.12E-02 | 68  |
|         | Corn   |          |                                      |          |     |
| Jejunum | stover | Negative | formation of lymphoid organ          | 1.12E-02 | 54  |
|         | Corn   |          |                                      |          |     |
| Jejunum | stover | Negative | cell death of stromal cells          | 1.13E-02 | 6   |
| Jejunum | Corn   | Negative | synthesis of porphyrin               | 1.14E-02 | 11  |

|         |        |          |                                              |          |     |
|---------|--------|----------|----------------------------------------------|----------|-----|
|         | stover |          |                                              |          |     |
|         | Corn   |          |                                              |          |     |
| Jejunum | stover | Negative | proliferation of blood cells                 | 1.15E-02 | 156 |
|         | Corn   |          |                                              |          |     |
| Jejunum | stover | Negative | Organ Degeneration                           | 1.16E-02 | 95  |
|         | Corn   |          |                                              |          |     |
| Jejunum | stover | Negative | polymerization of protein                    | 1.16E-02 | 73  |
|         | Corn   |          |                                              |          |     |
| Jejunum | stover | Negative | apoptosis of muscle cell lines               | 1.16E-02 | 17  |
|         | Corn   |          |                                              |          |     |
| Jejunum | stover | Negative | abnormal morphology of axial skeleton        | 1.20E-02 | 41  |
|         | Corn   |          |                                              |          |     |
| Jejunum | stover | Negative | growth of blood vessel                       | 1.20E-02 | 22  |
|         | Corn   |          |                                              |          |     |
| Jejunum | stover | Negative | activation of cells                          | 1.20E-02 | 179 |
|         | Corn   |          |                                              |          |     |
| Jejunum | stover | Negative | growth of renal glomerulus                   | 1.20E-02 | 18  |
|         | Corn   |          |                                              |          |     |
| Jejunum | stover | Negative | infection by RNA virus                       | 1.21E-02 | 160 |
|         | Corn   |          |                                              |          |     |
| Jejunum | stover | Negative | long-term potentiation                       | 1.21E-02 | 50  |
|         | Corn   |          |                                              |          |     |
| Jejunum | stover | Negative | damage of liver cells                        | 1.21E-02 | 9   |
|         | Corn   |          |                                              |          |     |
| Jejunum | stover | Negative | collapse of growth cone                      | 1.21E-02 | 19  |
|         | Corn   |          |                                              |          |     |
| Jejunum | stover | Negative | migration of leukemia cell lines             | 1.22E-02 | 20  |
|         | Corn   |          |                                              |          |     |
| Jejunum | stover | Negative | abnormal morphology of skeleton              | 1.22E-02 | 55  |
|         | Corn   |          |                                              |          |     |
| Jejunum | stover | Negative | adhesion of blood cells                      | 1.22E-02 | 74  |
|         | Corn   |          |                                              |          |     |
| Jejunum | stover | Negative | proliferation of hematopoietic cells         | 1.23E-02 | 52  |
|         | Corn   |          |                                              |          |     |
| Jejunum | stover | Negative | development of abdomen                       | 1.23E-02 | 110 |
|         | Corn   |          |                                              |          |     |
| Jejunum | stover | Negative | allergy                                      | 1.23E-02 | 79  |
|         | Corn   |          |                                              |          |     |
| Jejunum | stover | Negative | exit from S phase of colon cancer cell lines | 1.23E-02 | 5   |
|         | Corn   |          |                                              |          |     |
| Jejunum | stover | Negative | proliferation of immune cells                | 1.23E-02 | 147 |
|         | Corn   |          |                                              |          |     |
| Jejunum | stover | Negative | replication of RNA virus                     | 1.23E-02 | 97  |
| Jejunum | Corn   | Negative | autosomal dominant disease                   | 1.27E-02 | 120 |



|         |        |          |                                        |          |     |
|---------|--------|----------|----------------------------------------|----------|-----|
|         | stover |          |                                        |          |     |
|         | Corn   |          |                                        |          |     |
| Jejunum | stover | Negative | homeostasis of transition metal ion    | 1.27E-02 | 16  |
|         | Corn   |          |                                        |          |     |
| Jejunum | stover | Negative | size of animal                         | 1.27E-02 | 38  |
|         | Corn   |          |                                        |          |     |
| Jejunum | stover | Negative | abnormal morphology of nephron         | 1.27E-02 | 31  |
|         | Corn   |          |                                        |          |     |
| Jejunum | stover | Negative | development of connective tissue cells | 1.27E-02 | 46  |
|         | Corn   |          |                                        |          |     |
| Jejunum | stover | Negative | formation of skin                      | 1.29E-02 | 72  |
|         | Corn   |          |                                        |          |     |
| Jejunum | stover | Negative | flux of ion                            | 1.31E-02 | 64  |
|         | Corn   |          |                                        |          |     |
| Jejunum | stover | Negative | differentiation of leukocytes          | 1.31E-02 | 126 |
|         | Corn   |          |                                        |          |     |
| Jejunum | stover | Negative | cell death of melanoma cell lines      | 1.32E-02 | 51  |
|         | Corn   |          |                                        |          |     |
| Jejunum | stover | Negative | homeostasis of Cu <sup>2+</sup>        | 1.32E-02 | 7   |
|         | Corn   |          |                                        |          |     |
| Jejunum | stover | Negative | number of caudal vertebra              | 1.32E-02 | 7   |
|         | Corn   |          |                                        |          |     |
| Jejunum | stover | Negative | Dermatitis                             | 1.32E-02 | 84  |
|         | Corn   |          |                                        |          |     |
| Jejunum | stover | Negative | mitosis                                | 1.32E-02 | 95  |
|         | Corn   |          |                                        |          |     |
| Jejunum | stover | Negative | mass of connective tissue              | 1.32E-02 | 42  |
|         | Corn   |          |                                        |          |     |
| Jejunum | stover | Negative | morphology of axial skeleton           | 1.32E-02 | 42  |
|         | Corn   |          |                                        |          |     |
| Jejunum | stover | Negative | function of neutrophils                | 1.32E-02 | 21  |
|         | Corn   |          |                                        |          |     |
| Jejunum | stover | Negative | morphology of cardiovascular tissue    | 1.32E-02 | 21  |
|         | Corn   |          |                                        |          |     |
| Jejunum | stover | Negative | migration of stem cells                | 1.32E-02 | 13  |
|         | Corn   |          |                                        |          |     |
| Jejunum | stover | Negative | synthesis of heme                      | 1.32E-02 | 10  |
|         | Corn   |          |                                        |          |     |
| Jejunum | stover | Negative | abnormal morphology of vertebrae       | 1.32E-02 | 30  |
|         | Corn   |          |                                        |          |     |
| Jejunum | stover | Negative | concentration of phosphatidic acid     | 1.32E-02 | 30  |
|         | Corn   |          |                                        |          |     |
| Jejunum | stover | Negative | function of phagocytes                 | 1.32E-02 | 61  |
| Jejunum | Corn   | Negative | remodeling of bone                     | 1.32E-02 | 40  |

|         |        |          |                                            |          |     |
|---------|--------|----------|--------------------------------------------|----------|-----|
|         | stover |          |                                            |          |     |
|         | Corn   |          |                                            |          |     |
| Jejunum | stover | Negative | infection by Retroviridae                  | 1.33E-02 | 134 |
|         | Corn   |          |                                            |          |     |
| Jejunum | stover | Negative | proliferation of kidney cells              | 1.33E-02 | 19  |
|         | Corn   |          |                                            |          |     |
| Jejunum | stover | Negative | glucose metabolism disorder                | 1.33E-02 | 230 |
|         | Corn   |          |                                            |          |     |
| Jejunum | stover | Negative | cell death of epithelial cells             | 1.34E-02 | 95  |
|         | Corn   |          |                                            |          |     |
| Jejunum | stover | Negative | synthesis of fatty acid                    | 1.34E-02 | 62  |
|         | Corn   |          |                                            |          |     |
| Jejunum | stover | Negative | abnormal morphology of epithelial tissue   | 1.39E-02 | 81  |
|         | Corn   |          |                                            |          |     |
| Jejunum | stover | Negative | growth of yeast                            | 1.40E-02 | 23  |
|         | Corn   |          |                                            |          |     |
| Jejunum | stover | Negative | shape change of neurites                   | 1.40E-02 | 57  |
|         | Corn   |          |                                            |          |     |
| Jejunum | stover | Negative | quantity of hematopoietic progenitor cells | 1.42E-02 | 85  |
|         | Corn   |          |                                            |          |     |
| Jejunum | stover | Negative | synthesis of nucleotide                    | 1.44E-02 | 71  |
|         | Corn   |          |                                            |          |     |
| Jejunum | stover | Negative | contractility of myocardium                | 1.44E-02 | 16  |
|         | Corn   |          |                                            |          |     |
| Jejunum | stover | Negative | cell movement of sarcoma cell lines        | 1.44E-02 | 22  |
|         | Corn   |          |                                            |          |     |
| Jejunum | stover | Negative | activation of Protein kinase               | 1.45E-02 | 51  |
|         | Corn   |          |                                            |          |     |
| Jejunum | stover | Negative | morphology of muscle                       | 1.47E-02 | 66  |
|         | Corn   |          |                                            |          |     |
| Jejunum | stover | Negative | fertility                                  | 1.52E-02 | 71  |
|         | Corn   |          |                                            |          |     |
| Jejunum | stover | Negative | morphology of endothelial tissue           | 1.52E-02 | 20  |
|         | Corn   |          |                                            |          |     |
| Jejunum | stover | Negative | smooth muscle tumor                        | 1.52E-02 | 60  |
|         | Corn   |          |                                            |          |     |
| Jejunum | stover | Negative | stage 2-3 breast cancer                    | 1.52E-02 | 18  |
|         | Corn   |          |                                            |          |     |
| Jejunum | stover | Negative | cell death of brain                        | 1.53E-02 | 58  |
|         | Corn   |          |                                            |          |     |
| Jejunum | stover | Negative | reorganization of cytoskeleton             | 1.53E-02 | 40  |
|         | Corn   |          |                                            |          |     |
| Jejunum | stover | Negative | accumulation of myeloid cells              | 1.55E-02 | 37  |
| Jejunum | Corn   | Negative | vascularization                            | 1.55E-02 | 48  |

|         |        |          |                                                      |          |     |
|---------|--------|----------|------------------------------------------------------|----------|-----|
|         | stover |          |                                                      |          |     |
|         | Corn   |          |                                                      |          |     |
| Jejunum | stover | Negative | migration of mesenchymal stem cells                  | 1.56E-02 | 9   |
|         | Corn   |          |                                                      |          |     |
| Jejunum | stover | Negative | leiomyomatosis                                       | 1.57E-02 | 57  |
|         | Corn   |          |                                                      |          |     |
| Jejunum | stover | Negative | apoptosis of bone marrow cells                       | 1.60E-02 | 15  |
|         | Corn   |          |                                                      |          |     |
| Jejunum | stover | Negative | congenital disorders of glycosylation                | 1.60E-02 | 15  |
|         | Corn   |          |                                                      |          |     |
| Jejunum | stover | Negative | proliferation of glomerular cells                    | 1.60E-02 | 15  |
|         | Corn   |          |                                                      |          |     |
| Jejunum | stover | Negative | formation of lymphatic system component              | 1.61E-02 | 58  |
|         | Corn   |          |                                                      |          |     |
| Jejunum | stover | Negative | long-term potentiation of synapse                    | 1.64E-02 | 32  |
|         | Corn   |          |                                                      |          |     |
| Jejunum | stover | Negative | exocytosis by cells                                  | 1.64E-02 | 28  |
|         | Corn   |          |                                                      |          |     |
| Jejunum | stover | Negative | HIV infection                                        | 1.65E-02 | 132 |
|         | Corn   |          |                                                      |          |     |
| Jejunum | stover | Negative | development of head                                  | 1.66E-02 | 178 |
|         | Corn   |          |                                                      |          |     |
| Jejunum | stover | Negative | synthesis of polysaccharide                          | 1.66E-02 | 38  |
|         | Corn   |          |                                                      |          |     |
| Jejunum | stover | Negative | migration of muscle cells                            | 1.67E-02 | 35  |
|         | Corn   |          |                                                      |          |     |
| Jejunum | stover | Negative | autosomal dominant Emery-Dreifuss muscular dystrophy | 1.67E-02 | 16  |
|         | Corn   |          |                                                      |          |     |
| Jejunum | stover | Negative | release of ATP                                       | 1.67E-02 | 12  |
|         | Corn   |          |                                                      |          |     |
| Jejunum | stover | Negative | activation of neuroglia                              | 1.67E-02 | 29  |
|         | Corn   |          |                                                      |          |     |
| Jejunum | stover | Negative | function of heart                                    | 1.67E-02 | 47  |
|         | Corn   |          |                                                      |          |     |
| Jejunum | stover | Negative | genodermatosis                                       | 1.73E-02 | 19  |
|         | Corn   |          |                                                      |          |     |
| Jejunum | stover | Negative | benign connective or soft tissue neoplasm            | 1.74E-02 | 71  |
|         | Corn   |          |                                                      |          |     |
| Jejunum | stover | Negative | quantity of antigen presenting cells                 | 1.75E-02 | 55  |
|         | Corn   |          |                                                      |          |     |
| Jejunum | stover | Negative | synthesis of nitric oxide                            | 1.75E-02 | 55  |
|         | Corn   |          |                                                      |          |     |
| Jejunum | stover | Negative | coagulation                                          | 1.75E-02 | 40  |
| Jejunum | Corn   | Negative | proliferation of lymphatic endothelial cells         | 1.76E-02 | 8   |

|         |        |          |                                             |          |    |
|---------|--------|----------|---------------------------------------------|----------|----|
|         | stover |          |                                             |          |    |
|         | Corn   |          |                                             |          |    |
| Jejunum | stover | Negative | uptake of thymidine                         | 1.76E-02 | 8  |
|         | Corn   |          |                                             |          |    |
| Jejunum | stover | Negative | proliferation of prostate cancer cell lines | 1.76E-02 | 60 |
|         | Corn   |          |                                             |          |    |
| Jejunum | stover | Negative | abnormal morphology of zona fasciculata     | 1.76E-02 | 6  |
|         | Corn   |          |                                             |          |    |
| Jejunum | stover | Negative | exit from S phase                           | 1.76E-02 | 6  |
|         | Corn   |          |                                             |          |    |
| Jejunum | stover | Negative | growth of Candida albicans ATCC 90028       | 1.76E-02 | 6  |
|         | Corn   |          |                                             |          |    |
| Jejunum | stover | Negative | import of lipid                             | 1.76E-02 | 6  |
|         | Corn   |          |                                             |          |    |
| Jejunum | stover | Negative | shape change of neuroblastoma cell lines    | 1.76E-02 | 6  |
|         | Corn   |          |                                             |          |    |
| Jejunum | stover | Negative | glomerulosclerosis                          | 1.76E-02 | 28 |
|         | Corn   |          |                                             |          |    |
| Jejunum | stover | Negative | synthesis of terpenoid                      | 1.77E-02 | 56 |
|         | Corn   |          |                                             |          |    |
| Jejunum | stover | Negative | growth of brain                             | 1.81E-02 | 26 |
|         | Corn   |          |                                             |          |    |
| Jejunum | stover | Negative | quantity of muscle cells                    | 1.81E-02 | 26 |
|         | Corn   |          |                                             |          |    |
| Jejunum | stover | Negative | glycolysis                                  | 1.81E-02 | 29 |
|         | Corn   |          |                                             |          |    |
| Jejunum | stover | Negative | activation of phagocytes                    | 1.81E-02 | 72 |
|         | Corn   |          |                                             |          |    |
| Jejunum | stover | Negative | binding of protein binding site             | 1.81E-02 | 57 |
|         | Corn   |          |                                             |          |    |
| Jejunum | stover | Negative | cell movement of macrophages                | 1.81E-02 | 53 |
|         | Corn   |          |                                             |          |    |
| Jejunum | stover | Negative | branching of neurites                       | 1.81E-02 | 55 |
|         | Corn   |          |                                             |          |    |
| Jejunum | stover | Negative | apoptosis of kidney cell lines              | 1.82E-02 | 48 |
|         | Corn   |          |                                             |          |    |
| Jejunum | stover | Negative | production of HIV                           | 1.82E-02 | 15 |
|         | Corn   |          |                                             |          |    |
| Jejunum | stover | Negative | morphology of vertebral column              | 1.85E-02 | 31 |
|         | Corn   |          |                                             |          |    |
| Jejunum | stover | Negative | activation of hematopoietic cells           | 1.85E-02 | 13 |
|         | Corn   |          |                                             |          |    |
| Jejunum | stover | Negative | metabolism of porphyrin                     | 1.85E-02 | 13 |
| Jejunum | Corn   | Negative | proliferation of mesangial cells            | 1.85E-02 | 13 |

|         |        |          |                                              |          |     |
|---------|--------|----------|----------------------------------------------|----------|-----|
|         | stover |          |                                              |          |     |
|         | Corn   |          |                                              |          |     |
| Jejunum | stover | Negative | cell movement of fibroblasts                 | 1.87E-02 | 38  |
|         | Corn   |          |                                              |          |     |
| Jejunum | stover | Negative | morphology of lymph node                     | 1.90E-02 | 34  |
|         | Corn   |          |                                              |          |     |
| Jejunum | stover | Negative | homeostasis of leukocytes                    | 1.91E-02 | 104 |
|         | Corn   |          |                                              |          |     |
| Jejunum | stover | Negative | quantity of marginal-zone B lymphocytes      | 1.91E-02 | 19  |
|         | Corn   |          |                                              |          |     |
| Jejunum | stover | Negative | transmigration of blood cells                | 1.91E-02 | 28  |
|         | Corn   |          |                                              |          |     |
| Jejunum | stover | Negative | export of molecule                           | 1.95E-02 | 58  |
|         | Corn   |          |                                              |          |     |
| Jejunum | stover | Negative | cell death of brain cells                    | 1.97E-02 | 54  |
|         | Corn   |          |                                              |          |     |
| Jejunum | stover | Negative | activation of hematopoietic progenitor cells | 1.98E-02 | 12  |
|         | Corn   |          |                                              |          |     |
| Jejunum | stover | Negative | synthesis of hyaluronic acid                 | 1.98E-02 | 12  |
|         | Corn   |          |                                              |          |     |
| Jejunum | stover | Negative | abnormal thermoregulation                    | 1.98E-02 | 9   |
|         | Corn   |          |                                              |          |     |
| Jejunum | stover | Negative | congenital disorder of glycosylation type 1  | 1.98E-02 | 9   |
|         | Corn   |          |                                              |          |     |
| Jejunum | stover | Negative | metabolism of nucleoside triphosphate        | 1.98E-02 | 30  |
|         | Corn   |          |                                              |          |     |
| Jejunum | stover | Negative | quantity of interleukin                      | 1.98E-02 | 30  |
|         | Corn   |          |                                              |          |     |
| Jejunum | stover | Negative | mass of adipose tissue                       | 1.98E-02 | 39  |
|         | Corn   |          |                                              |          |     |
| Jejunum | stover | Negative | chronic myeloid leukemia                     | 1.98E-02 | 24  |
|         | Corn   |          |                                              |          |     |
| Jejunum | stover | Negative | contractility of cardiac muscle              | 2.00E-02 | 31  |
|         | Corn   |          |                                              |          |     |
| Jejunum | stover | Negative | differentiation of muscle cell lines         | 2.04E-02 | 34  |
|         | Corn   |          |                                              |          |     |
| Jejunum | stover | Negative | Lymphocyte homeostasis                       | 2.06E-02 | 102 |
|         | Corn   |          |                                              |          |     |
| Jejunum | stover | Negative | migration of mesenchymal cells               | 2.06E-02 | 11  |
|         | Corn   |          |                                              |          |     |
| Jejunum | stover | Negative | activation of vascular endothelial cells     | 2.08E-02 | 10  |
|         | Corn   |          |                                              |          |     |
| Jejunum | stover | Negative | apoptosis of melanoma cell lines             | 2.08E-02 | 28  |
| Jejunum | Corn   | Negative | production of virus                          | 2.09E-02 | 23  |

|         |        |          |                                                    |          |    |
|---------|--------|----------|----------------------------------------------------|----------|----|
|         | stover |          |                                                    |          |    |
|         | Corn   |          |                                                    |          |    |
| Jejunum | stover | Negative | release of nitric oxide                            | 2.10E-02 | 20 |
|         | Corn   |          |                                                    |          |    |
| Jejunum | stover | Negative | morphology of brain                                | 2.10E-02 | 88 |
|         | Corn   |          |                                                    |          |    |
| Jejunum | stover | Negative | stage 3 cancer                                     | 2.12E-02 | 29 |
|         | Corn   |          |                                                    |          |    |
| Jejunum | stover | Negative | cell death of cerebral cortex cells                | 2.14E-02 | 46 |
|         | Corn   |          |                                                    |          |    |
| Jejunum | stover | Negative | spatial learning                                   | 2.15E-02 | 38 |
|         | Corn   |          |                                                    |          |    |
| Jejunum | stover | Negative | bone mineral density                               | 2.19E-02 | 36 |
|         | Corn   |          |                                                    |          |    |
| Jejunum | stover | Negative | abnormal morphology of lymph node                  | 2.20E-02 | 32 |
|         | Corn   |          |                                                    |          |    |
| Jejunum | stover | Negative | apoptosis of stromal cells                         | 2.21E-02 | 5  |
|         | Corn   |          |                                                    |          |    |
| Jejunum | stover | Negative | metabolism of fructose-6-phosphate                 | 2.21E-02 | 5  |
|         | Corn   |          |                                                    |          |    |
| Jejunum | stover | Negative | re-entry into cell cycle progression of fibroblast | 2.21E-02 | 5  |
|         | Corn   |          |                                                    |          |    |
| Jejunum | stover | Negative | cell lines                                         | 2.21E-02 | 5  |
|         | Corn   |          |                                                    |          |    |
| Jejunum | stover | Negative | abnormal morphology of marginal-zone B             | 2.24E-02 | 4  |
|         | Corn   |          |                                                    |          |    |
| Jejunum | stover | Negative | lymphocytes                                        | 2.24E-02 | 4  |
|         | Corn   |          |                                                    |          |    |
| Jejunum | stover | Negative | cell death of bone marrow stromal cells            | 2.24E-02 | 4  |
|         | Corn   |          |                                                    |          |    |
| Jejunum | stover | Negative | hereditary nonspherocytic hemolytic anemia         | 2.24E-02 | 4  |
|         | Corn   |          |                                                    |          |    |
| Jejunum | stover | Negative | quantity of renal tubule                           | 2.24E-02 | 4  |
|         | Corn   |          |                                                    |          |    |
| Jejunum | stover | Negative | metabolism of nucleotide                           | 2.27E-02 | 83 |
|         | Corn   |          |                                                    |          |    |
| Jejunum | stover | Negative | branching of neurons                               | 2.28E-02 | 56 |
|         | Corn   |          |                                                    |          |    |
| Jejunum | stover | Negative | cell death of smooth muscle cells                  | 2.28E-02 | 25 |
|         | Corn   |          |                                                    |          |    |
| Jejunum | stover | Negative | differentiation of bone                            | 2.32E-02 | 78 |
|         | Corn   |          |                                                    |          |    |
| Jejunum | stover | Negative | Ph positive chronic myeloid leukemia in chronic    | 2.32E-02 | 8  |
|         | Corn   |          |                                                    |          |    |
| Jejunum | stover | Negative | phase                                              | 2.32E-02 | 8  |
|         | Corn   |          |                                                    |          |    |
| Jejunum | stover | Negative | advanced sarcoma                                   | 2.32E-02 | 8  |
|         | Corn   |          |                                                    |          |    |
| Jejunum | stover | Negative | quantity of sustentacular cells                    | 2.32E-02 | 8  |
| Jejunum | Corn   | Negative | release of eicosanoid                              | 2.32E-02 | 30 |

|         |         |          |                                          |          |      |
|---------|---------|----------|------------------------------------------|----------|------|
|         | stover  |          |                                          |          |      |
|         | Corn    |          |                                          |          |      |
| Jejunum | stover  | Negative | quantity of protein in blood             | 2.32E-02 | 95   |
|         | Corn    |          |                                          |          |      |
| Jejunum | stover  | Negative | accumulation of antigen presenting cells | 2.32E-02 | 20   |
|         | Corn    |          |                                          |          |      |
| Jejunum | stover  | Negative | autosomal dominant myopathy              | 2.32E-02 | 20   |
|         | Corn    |          |                                          |          |      |
| Jejunum | stover  | Negative | morphology of left ventricle             | 2.32E-02 | 20   |
|         | Corn    |          |                                          |          |      |
| Jejunum | stover  | Negative | production of HIV-1                      | 2.32E-02 | 14   |
|         | Corn    |          |                                          |          |      |
| Jejunum | stover  | Negative | stress response of tumor cell lines      | 2.32E-02 | 14   |
|         | Corn    |          |                                          |          |      |
| Jejunum | stover  | Negative | cell death of leukocyte cell lines       | 2.32E-02 | 41   |
|         | Corn    |          |                                          |          |      |
| Jejunum | stover  | Negative | release of fatty acid                    | 2.32E-02 | 35   |
|         | Corn    |          |                                          |          |      |
| Jejunum | stover  | Negative | formation of vesicles                    | 2.32E-02 | 26   |
|         | Corn    |          |                                          |          |      |
| Jejunum | stover  | Negative | chemotaxis of leukocytes                 | 2.33E-02 | 68   |
|         | Corn    |          |                                          |          |      |
| Jejunum | stover  | Negative | activation of enzyme                     | 2.33E-02 | 74   |
|         | Corn    |          |                                          |          |      |
| Jejunum | stover  | Negative | disorder of lipid metabolism             | 2.35E-02 | 40   |
|         | Corn    |          |                                          |          |      |
| Jejunum | stover  | Negative | cell death of hematopoietic cell lines   | 2.37E-02 | 46   |
|         | Corn    |          |                                          |          |      |
| Jejunum | stover  | Negative | aggregation of blood platelets           | 2.39E-02 | 39   |
|         | Corn    |          |                                          |          |      |
| Jejunum | stover  | Negative | T cell development                       | 2.40E-02 | 94   |
|         | Corn    |          |                                          |          |      |
| Jejunum | stover  | Negative | development of leukocytes                | 2.41E-02 | 109  |
|         | Alfalfa |          |                                          |          |      |
| Liver   | hay     | Positive | cancer                                   | 1.78E-32 | 3020 |
|         | Alfalfa |          |                                          |          |      |
| Liver   | hay     | Positive | malignant solid tumor                    | 1.78E-32 | 2988 |
|         | Alfalfa |          |                                          |          |      |
| Liver   | hay     | Positive | morphology of cells                      | 1.33E-26 | 681  |
|         | Alfalfa |          |                                          |          |      |
| Liver   | hay     | Positive | cell death                               | 2.05E-25 | 1066 |
|         | Alfalfa |          |                                          |          |      |
| Liver   | hay     | Positive | organismal death                         | 4.20E-24 | 798  |
| Liver   | Alfalfa | Positive | proliferation of cells                   | 4.54E-24 | 1155 |

|       |         |          |                                |          |      |
|-------|---------|----------|--------------------------------|----------|------|
|       | hay     |          |                                |          |      |
|       | Alfalfa |          |                                |          |      |
| Liver | hay     | Positive | morbidity or mortality         | 5.60E-24 | 806  |
|       | Alfalfa |          |                                |          |      |
| Liver | hay     | Positive | necrosis                       | 2.26E-21 | 834  |
|       | Alfalfa |          |                                |          |      |
| Liver | hay     | Positive | apoptosis                      | 7.02E-20 | 846  |
|       | Alfalfa |          |                                |          |      |
| Liver | hay     | Positive | neoplasia of epithelial tissue | 4.45E-16 | 2451 |
|       | Alfalfa |          |                                |          |      |
| Liver | hay     | Positive | angiogenesis                   | 1.65E-15 | 328  |
|       | Alfalfa |          |                                |          |      |
| Liver | hay     | Positive | cell death of tumor cell lines | 1.68E-15 | 510  |
|       | Alfalfa |          |                                |          |      |
| Liver | hay     | Positive | cell movement                  | 1.68E-15 | 680  |
|       | Alfalfa |          |                                |          |      |
| Liver | hay     | Positive | abdominal neoplasm             | 2.69E-15 | 2428 |
|       | Alfalfa |          |                                |          |      |
| Liver | hay     | Positive | expression of RNA              | 2.72E-15 | 684  |
|       | Alfalfa |          |                                |          |      |
| Liver | hay     | Positive | abnormal morphology of cells   | 2.96E-15 | 433  |
|       | Alfalfa |          |                                |          |      |
| Liver | hay     | Positive | tumorigenesis of tissue        | 3.33E-15 | 2481 |
|       | Alfalfa |          |                                |          |      |
| Liver | hay     | Positive | quantity of cells              | 3.33E-15 | 577  |
|       | Alfalfa |          |                                |          |      |
| Liver | hay     | Positive | epithelial cancer              | 3.59E-15 | 2422 |
|       | Alfalfa |          |                                |          |      |
| Liver | hay     | Positive | transport of molecule          | 3.92E-15 | 532  |
|       | Alfalfa |          |                                |          |      |
| Liver | hay     | Positive | differentiation of cells       | 6.61E-15 | 710  |
|       | Alfalfa |          |                                |          |      |
| Liver | hay     | Positive | migration of cells             | 6.61E-15 | 613  |
|       | Alfalfa |          |                                |          |      |
| Liver | hay     | Positive | transcription of RNA           | 1.12E-14 | 599  |
|       | Alfalfa |          |                                |          |      |
| Liver | hay     | Positive | organization of cytoskeleton   | 1.26E-14 | 467  |
|       | Alfalfa |          |                                |          |      |
| Liver | hay     | Positive | transcription                  | 1.26E-14 | 637  |
|       | Alfalfa |          |                                |          |      |
| Liver | hay     | Positive | organization of cytoplasm      | 1.45E-14 | 506  |
|       | Alfalfa |          |                                |          |      |
| Liver | hay     | Positive | cellular homeostasis           | 3.68E-14 | 501  |
| Liver | Alfalfa | Positive | abdominal cancer               | 4.07E-14 | 2392 |



|       |         |          |                                              |          |      |
|-------|---------|----------|----------------------------------------------|----------|------|
|       | hay     |          |                                              |          |      |
|       | Alfalfa |          |                                              |          |      |
| Liver | hay     | Positive | vasculogenesis                               | 4.23E-14 | 269  |
|       | Alfalfa |          |                                              |          |      |
| Liver | hay     | Positive | digestive organ tumor                        | 5.20E-14 | 2109 |
|       | Alfalfa |          |                                              |          |      |
| Liver | hay     | Positive | apoptosis of tumor cell lines                | 2.01E-13 | 408  |
|       | Alfalfa |          |                                              |          |      |
| Liver | hay     | Positive | digestive system cancer                      | 3.04E-13 | 2085 |
|       | Alfalfa |          |                                              |          |      |
| Liver | hay     | Positive | morphology of cardiovascular system          | 7.12E-13 | 228  |
|       | Alfalfa |          |                                              |          |      |
| Liver | hay     | Positive | metabolism of carbohydrate                   | 6.95E-12 | 225  |
|       | Alfalfa |          |                                              |          |      |
| Liver | hay     | Positive | quantity of leukocytes                       | 9.88E-12 | 314  |
|       | Alfalfa |          |                                              |          |      |
| Liver | hay     | Positive | microtubule dynamics                         | 1.01E-11 | 392  |
|       | Alfalfa |          |                                              |          |      |
| Liver | hay     | Positive | transcription of DNA                         | 1.04E-11 | 492  |
|       | Alfalfa |          |                                              |          |      |
| Liver | hay     | Positive | development of vasculature                   | 1.10E-11 | 160  |
|       | Alfalfa |          |                                              |          |      |
| Liver | hay     | Positive | cell survival                                | 1.32E-11 | 451  |
|       | Alfalfa |          |                                              |          |      |
| Liver | hay     | Positive | quantity of blood cells                      | 2.27E-11 | 345  |
|       | Alfalfa |          |                                              |          |      |
| Liver | hay     | Positive | cell spreading                               | 3.66E-11 | 112  |
|       | Alfalfa |          |                                              |          |      |
| Liver | hay     | Positive | cell movement of tumor cell lines            | 3.90E-11 | 292  |
|       | Alfalfa |          |                                              |          |      |
| Liver | hay     | Positive | Viral Infection                              | 4.17E-11 | 510  |
|       | Alfalfa |          |                                              |          |      |
| Liver | hay     | Positive | cell death of connective tissue cells        | 4.71E-11 | 216  |
|       | Alfalfa |          |                                              |          |      |
| Liver | hay     | Positive | synthesis of lipid                           | 5.36E-11 | 250  |
|       | Alfalfa |          |                                              |          |      |
| Liver | hay     | Positive | size of body                                 | 1.64E-10 | 289  |
|       | Alfalfa |          |                                              |          |      |
| Liver | hay     | Positive | autosomal recessive disease                  | 2.56E-10 | 309  |
|       | Alfalfa |          |                                              |          |      |
| Liver | hay     | Positive | concentration of lipid                       | 2.92E-10 | 276  |
|       | Alfalfa |          |                                              |          |      |
| Liver | hay     | Positive | abnormal morphology of cardiovascular system | 3.13E-10 | 202  |
| Liver | Alfalfa | Positive | development of body trunk                    | 3.17E-10 | 365  |

|       |         |          |                                              |          |     |
|-------|---------|----------|----------------------------------------------|----------|-----|
|       | hay     |          |                                              |          |     |
|       | Alfalfa |          |                                              |          |     |
| Liver | hay     | Positive | uptake of carbohydrate                       | 3.27E-10 | 114 |
|       | Alfalfa |          |                                              |          |     |
| Liver | hay     | Positive | cell viability                               | 3.27E-10 | 417 |
|       | Alfalfa |          |                                              |          |     |
| Liver | hay     | Positive | invasion of cells                            | 3.35E-10 | 293 |
|       | Alfalfa |          |                                              |          |     |
| Liver | hay     | Positive | quantity of connective tissue                | 4.84E-10 | 212 |
|       | Alfalfa |          |                                              |          |     |
| Liver | hay     | Positive | proliferation of tumor cell lines            | 1.35E-09 | 483 |
|       | Alfalfa |          |                                              |          |     |
| Liver | hay     | Positive | uptake of monosaccharide                     | 1.76E-09 | 105 |
|       | Alfalfa |          |                                              |          |     |
| Liver | hay     | Positive | function of cardiovascular system            | 2.14E-09 | 137 |
|       | Alfalfa |          |                                              |          |     |
| Liver | hay     | Positive | invasion of tumor cell lines                 | 2.71E-09 | 228 |
|       | Alfalfa |          |                                              |          |     |
| Liver | hay     | Positive | abnormal morphology of thoracic cavity       | 2.88E-09 | 204 |
|       | Alfalfa |          |                                              |          |     |
| Liver | hay     | Positive | morphology of body cavity                    | 4.40E-09 | 381 |
|       | Alfalfa |          |                                              |          |     |
| Liver | hay     | Positive | quantity of mononuclear leukocytes           | 4.51E-09 | 248 |
|       | Alfalfa |          |                                              |          |     |
| Liver | hay     | Positive | activation of DNA endogenous promoter        | 5.42E-09 | 385 |
|       | Alfalfa |          |                                              |          |     |
| Liver | hay     | Positive | necrosis of epithelial tissue                | 7.21E-09 | 203 |
|       | Alfalfa |          |                                              |          |     |
| Liver | hay     | Positive | development of epithelial tissue             | 7.21E-09 | 181 |
|       | Alfalfa |          |                                              |          |     |
| Liver | hay     | Positive | formation of cellular protrusions            | 7.93E-09 | 296 |
|       | Alfalfa |          |                                              |          |     |
| Liver | hay     | Positive | formation of cytoskeleton                    | 8.48E-09 | 137 |
|       | Alfalfa |          |                                              |          |     |
| Liver | hay     | Positive | development of body axis                     | 8.48E-09 | 339 |
|       | Alfalfa |          |                                              |          |     |
| Liver | hay     | Positive | formation of cells                           | 8.74E-09 | 319 |
|       | Alfalfa |          |                                              |          |     |
| Liver | hay     | Positive | congenital anomaly of musculoskeletal system | 1.30E-08 | 246 |
|       | Alfalfa |          |                                              |          |     |
| Liver | hay     | Positive | development of cytoplasm                     | 1.40E-08 | 163 |
|       | Alfalfa |          |                                              |          |     |
| Liver | hay     | Positive | function of leukocytes                       | 1.44E-08 | 186 |
| Liver | Alfalfa | Positive | cell death of fibroblast cell lines          | 1.53E-08 | 152 |

|       |         |          |                                          |          |     |
|-------|---------|----------|------------------------------------------|----------|-----|
|       | hay     |          |                                          |          |     |
|       | Alfalfa |          |                                          |          |     |
| Liver | hay     | Positive | quantity of lymphocytes                  | 1.58E-08 | 237 |
|       | Alfalfa |          |                                          |          |     |
| Liver | hay     | Positive | Movement Disorders                       | 1.73E-08 | 339 |
|       | Alfalfa |          |                                          |          |     |
| Liver | hay     | Positive | formation of muscle                      | 2.28E-08 | 142 |
|       | Alfalfa |          |                                          |          |     |
| Liver | hay     | Positive | fatty acid metabolism                    | 2.76E-08 | 204 |
|       | Alfalfa |          |                                          |          |     |
| Liver | hay     | Positive | abnormal morphology of body cavity       | 3.10E-08 | 361 |
|       | Alfalfa |          |                                          |          |     |
| Liver | hay     | Positive | shape change of tumor cell lines         | 3.10E-08 | 64  |
|       | Alfalfa |          |                                          |          |     |
| Liver | hay     | Positive | seizure disorder                         | 3.10E-08 | 164 |
|       | Alfalfa |          |                                          |          |     |
| Liver | hay     | Positive | growth of embryo                         | 3.44E-08 | 166 |
|       | Alfalfa |          |                                          |          |     |
| Liver | hay     | Positive | benign neoplasia                         | 3.62E-08 | 299 |
|       | Alfalfa |          |                                          |          |     |
| Liver | hay     | Positive | migration of tumor cell lines            | 3.62E-08 | 235 |
|       | Alfalfa |          |                                          |          |     |
| Liver | hay     | Positive | morphology of vessel                     | 3.62E-08 | 113 |
|       | Alfalfa |          |                                          |          |     |
| Liver | hay     | Positive | growth of organism                       | 3.62E-08 | 273 |
|       | Alfalfa |          |                                          |          |     |
| Liver | hay     | Positive | proliferation of connective tissue cells | 3.62E-08 | 201 |
|       | Alfalfa |          |                                          |          |     |
| Liver | hay     | Positive | function of blood cells                  | 3.78E-08 | 199 |
|       | Alfalfa |          |                                          |          |     |
| Liver | hay     | Positive | cellular infiltration by leukocytes      | 4.21E-08 | 138 |
|       | Alfalfa |          |                                          |          |     |
| Liver | hay     | Positive | growth of connective tissue              | 4.31E-08 | 216 |
|       | Alfalfa |          |                                          |          |     |
| Liver | hay     | Positive | morphology of blood vessel               | 4.31E-08 | 105 |
|       | Alfalfa |          |                                          |          |     |
| Liver | hay     | Positive | cell movement of leukocytes              | 4.89E-08 | 252 |
|       | Alfalfa |          |                                          |          |     |
| Liver | hay     | Positive | development of head                      | 5.36E-08 | 314 |
|       | Alfalfa |          |                                          |          |     |
| Liver | hay     | Positive | cell transformation                      | 5.61E-08 | 160 |
|       | Alfalfa |          |                                          |          |     |
| Liver | hay     | Positive | synthesis of carbohydrate                | 5.70E-08 | 149 |
| Liver | Alfalfa | Positive | cell death of epithelial cells           | 5.70E-08 | 171 |

|       |         |          |                                     |          |      |
|-------|---------|----------|-------------------------------------|----------|------|
|       | hay     |          |                                     |          |      |
|       | Alfalfa |          |                                     |          |      |
| Liver | hay     | Positive | formation of actin stress fibers    | 5.92E-08 | 91   |
|       | Alfalfa |          |                                     |          |      |
| Liver | hay     | Positive | homing                              | 6.67E-08 | 194  |
|       | Alfalfa |          |                                     |          |      |
| Liver | hay     | Positive | cell movement of neutrophils        | 6.74E-08 | 109  |
|       | Alfalfa |          |                                     |          |      |
| Liver | hay     | Positive | homing of cells                     | 7.00E-08 | 189  |
|       | Alfalfa |          |                                     |          |      |
| Liver | hay     | Positive | function of heart                   | 7.70E-08 | 88   |
|       | Alfalfa |          |                                     |          |      |
| Liver | hay     | Positive | formation of actin filaments        | 8.34E-08 | 111  |
|       | Alfalfa |          |                                     |          |      |
| Liver | hay     | Positive | proliferation of fibroblasts        | 8.59E-08 | 126  |
|       | Alfalfa |          |                                     |          |      |
| Liver | hay     | Positive | fibrogenesis                        | 8.89E-08 | 144  |
|       | Alfalfa |          |                                     |          |      |
| Liver | hay     | Positive | leukocyte migration                 | 9.05E-08 | 281  |
|       | Alfalfa |          |                                     |          |      |
| Liver | hay     | Positive | sprouting                           | 1.03E-07 | 136  |
|       | Alfalfa |          |                                     |          |      |
| Liver | hay     | Positive | breast or colorectal cancer         | 1.06E-07 | 1392 |
|       | Alfalfa |          |                                     |          |      |
| Liver | hay     | Positive | cellular infiltration of cells      | 1.26E-07 | 139  |
|       | Alfalfa |          |                                     |          |      |
| Liver | hay     | Positive | proliferation of blood cells        | 1.76E-07 | 271  |
|       | Alfalfa |          |                                     |          |      |
| Liver | hay     | Positive | differentiation of leukocytes       | 2.03E-07 | 221  |
|       | Alfalfa |          |                                     |          |      |
| Liver | hay     | Positive | synthesis of fatty acid             | 2.03E-07 | 112  |
|       | Alfalfa |          |                                     |          |      |
| Liver | hay     | Positive | apoptosis of fibroblast cell lines  | 2.03E-07 | 117  |
|       | Alfalfa |          |                                     |          |      |
| Liver | hay     | Positive | cell death of sarcoma cell lines    | 2.68E-07 | 85   |
|       | Alfalfa |          |                                     |          |      |
| Liver | hay     | Positive | abnormal morphology of blood vessel | 2.82E-07 | 97   |
|       | Alfalfa |          |                                     |          |      |
| Liver | hay     | Positive | cellular infiltration               | 3.10E-07 | 150  |
|       | Alfalfa |          |                                     |          |      |
| Liver | hay     | Positive | proliferation of immune cells       | 3.20E-07 | 255  |
|       | Alfalfa |          |                                     |          |      |
| Liver | hay     | Positive | cell viability of tumor cell lines  | 3.40E-07 | 251  |
| Liver | Alfalfa | Positive | quantity of carbohydrate            | 3.52E-07 | 174  |

|       |         |          |                                          |          |     |
|-------|---------|----------|------------------------------------------|----------|-----|
|       | hay     |          |                                          |          |     |
|       | Alfalfa |          |                                          |          |     |
| Liver | hay     | Positive | formation of skin                        | 3.57E-07 | 128 |
|       | Alfalfa |          |                                          |          |     |
| Liver | hay     | Positive | degeneration of cells                    | 3.75E-07 | 121 |
|       | Alfalfa |          |                                          |          |     |
| Liver | hay     | Positive | cell death of cervical cancer cell lines | 3.75E-07 | 123 |
|       | Alfalfa |          |                                          |          |     |
| Liver | hay     | Positive | advanced malignant tumor                 | 3.95E-07 | 270 |
|       | Alfalfa |          |                                          |          |     |
| Liver | hay     | Positive | metabolism of membrane lipid derivative  | 4.54E-07 | 134 |
|       | Alfalfa |          |                                          |          |     |
| Liver | hay     | Positive | differentiation of blood cells           | 4.65E-07 | 269 |
|       | Alfalfa |          |                                          |          |     |
| Liver | hay     | Positive | uptake of D-hexose                       | 4.82E-07 | 83  |
|       | Alfalfa |          |                                          |          |     |
| Liver | hay     | Positive | morphology of connective tissue          | 4.92E-07 | 156 |
|       | Alfalfa |          |                                          |          |     |
| Liver | hay     | Positive | concentration of phosphatidic acid       | 4.92E-07 | 55  |
|       | Alfalfa |          |                                          |          |     |
| Liver | hay     | Positive | survival of organism                     | 4.94E-07 | 228 |
|       | Alfalfa |          |                                          |          |     |
| Liver | hay     | Positive | growth of tumor                          | 5.07E-07 | 255 |
|       | Alfalfa |          |                                          |          |     |
| Liver | hay     | Positive | production of reactive oxygen species    | 5.51E-07 | 127 |
|       | Alfalfa |          |                                          |          |     |
| Liver | hay     | Positive | phosphorylation of protein               | 5.81E-07 | 237 |
|       | Alfalfa |          |                                          |          |     |
| Liver | hay     | Positive | uptake of D-glucose                      | 5.81E-07 | 82  |
|       | Alfalfa |          |                                          |          |     |
| Liver | hay     | Positive | contractility of myocardium              | 5.98E-07 | 30  |
|       | Alfalfa |          |                                          |          |     |
| Liver | hay     | Positive | disorder of basal ganglia                | 6.14E-07 | 246 |
|       | Alfalfa |          |                                          |          |     |
| Liver | hay     | Positive | cell movement of phagocytes              | 6.36E-07 | 182 |
|       | Alfalfa |          |                                          |          |     |
| Liver | hay     | Positive | contractility of ventricular myocardium  | 6.38E-07 | 28  |
|       | Alfalfa |          |                                          |          |     |
| Liver | hay     | Positive | quantity of metal ion                    | 6.60E-07 | 150 |
|       | Alfalfa |          |                                          |          |     |
| Liver | hay     | Positive | function of muscle                       | 7.03E-07 | 121 |
|       | Alfalfa |          |                                          |          |     |
| Liver | hay     | Positive | cell movement of myeloid cells           | 7.11E-07 | 179 |
| Liver | Alfalfa | Positive | metastatic colorectal cancer             | 7.11E-07 | 73  |

|       |         |          |                                          |          |     |
|-------|---------|----------|------------------------------------------|----------|-----|
|       | hay     |          |                                          |          |     |
|       | Alfalfa |          |                                          |          |     |
| Liver | hay     | Positive | autophagy                                | 7.81E-07 | 129 |
|       | Alfalfa |          |                                          |          |     |
| Liver | hay     | Positive | formation of filaments                   | 7.83E-07 | 136 |
|       | Alfalfa |          |                                          |          |     |
| Liver | hay     | Positive | chemotaxis                               | 8.99E-07 | 180 |
|       | Alfalfa |          |                                          |          |     |
| Liver | hay     | Positive | metastasis                               | 8.99E-07 | 243 |
|       | Alfalfa |          |                                          |          |     |
| Liver | hay     | Positive | quantity of metal                        | 9.26E-07 | 166 |
|       | Alfalfa |          |                                          |          |     |
| Liver | hay     | Positive | neuronal cell death                      | 9.71E-07 | 220 |
|       | Alfalfa |          |                                          |          |     |
| Liver | hay     | Positive | morphology of heart                      | 9.71E-07 | 138 |
|       | Alfalfa |          |                                          |          |     |
| Liver | hay     | Positive | cardiogenesis                            | 9.78E-07 | 158 |
|       | Alfalfa |          |                                          |          |     |
| Liver | hay     | Positive | seizures                                 | 9.83E-07 | 136 |
|       | Alfalfa |          |                                          |          |     |
| Liver | hay     | Positive | development of cardiovascular tissue     | 9.91E-07 | 127 |
|       | Alfalfa |          |                                          |          |     |
| Liver | hay     | Positive | growth of muscle tissue                  | 1.05E-06 | 128 |
|       | Alfalfa |          |                                          |          |     |
| Liver | hay     | Positive | mitosis                                  | 1.08E-06 | 165 |
|       | Alfalfa |          |                                          |          |     |
| Liver | hay     | Positive | development of digestive system          | 1.08E-06 | 131 |
|       | Alfalfa |          |                                          |          |     |
| Liver | hay     | Positive | morphology of lymphatic system component | 1.08E-06 | 141 |
|       | Alfalfa |          |                                          |          |     |
| Liver | hay     | Positive | abnormal morphology of abdomen           | 1.08E-06 | 276 |
|       | Alfalfa |          |                                          |          |     |
| Liver | hay     | Positive | cell spreading of tumor cell lines       | 1.09E-06 | 45  |
|       | Alfalfa |          |                                          |          |     |
| Liver | hay     | Positive | chemotaxis of cells                      | 1.23E-06 | 174 |
|       | Alfalfa |          |                                          |          |     |
| Liver | hay     | Positive | growth of lymphatic system component     | 1.24E-06 | 72  |
|       | Alfalfa |          |                                          |          |     |
| Liver | hay     | Positive | proliferation of muscle cells            | 1.24E-06 | 127 |
|       | Alfalfa |          |                                          |          |     |
| Liver | hay     | Positive | morphology of muscle                     | 1.39E-06 | 116 |
|       | Alfalfa |          |                                          |          |     |
| Liver | hay     | Positive | mammary tumor                            | 1.48E-06 | 488 |
| Liver | Alfalfa | Positive | formation of eye                         | 1.55E-06 | 147 |

|       |         |          |                                                   |          |     |
|-------|---------|----------|---------------------------------------------------|----------|-----|
|       | hay     |          |                                                   |          |     |
|       | Alfalfa |          |                                                   |          |     |
| Liver | hay     | Positive | neurological signs                                | 1.55E-06 | 210 |
|       | Alfalfa |          |                                                   |          |     |
| Liver | hay     | Positive | quantity of myeloid cells                         | 1.55E-06 | 122 |
|       | Alfalfa |          |                                                   |          |     |
| Liver | hay     | Positive | angiogenesis of lesion                            | 1.70E-06 | 51  |
|       | Alfalfa |          |                                                   |          |     |
| Liver | hay     | Positive | branching of cells                                | 1.71E-06 | 126 |
|       | Alfalfa |          |                                                   |          |     |
| Liver | hay     | Positive | synthesis of reactive oxygen species              | 1.87E-06 | 159 |
|       | Alfalfa |          |                                                   |          |     |
| Liver | hay     | Positive | epilepsy                                          | 1.88E-06 | 107 |
|       | Alfalfa |          |                                                   |          |     |
| Liver | hay     | Positive | transactivation                                   | 1.98E-06 | 188 |
|       | Alfalfa |          |                                                   |          |     |
| Liver | hay     | Positive | development of leukocytes                         | 2.08E-06 | 191 |
|       | Alfalfa |          |                                                   |          |     |
| Liver | hay     | Positive | infection by Retroviridae                         | 2.15E-06 | 229 |
|       | Alfalfa |          |                                                   |          |     |
| Liver | hay     | Positive | cell cycle progression                            | 2.25E-06 | 322 |
|       | Alfalfa |          |                                                   |          |     |
| Liver | hay     | Positive | quantity of Ca <sup>2+</sup>                      | 2.28E-06 | 137 |
|       | Alfalfa |          |                                                   |          |     |
| Liver | hay     | Positive | phosphorylation of amino acids                    | 2.36E-06 | 80  |
|       | Alfalfa |          |                                                   |          |     |
| Liver | hay     | Positive | skin abnormality                                  | 2.58E-06 | 82  |
|       | Alfalfa |          |                                                   |          |     |
| Liver | hay     | Positive | abnormal morphology of epithelial tissue          | 2.58E-06 | 140 |
|       | Alfalfa |          |                                                   |          |     |
| Liver | hay     | Positive | T cell homeostasis                                | 2.66E-06 | 169 |
|       | Alfalfa |          |                                                   |          |     |
| Liver | hay     | Positive | T cell development                                | 2.66E-06 | 165 |
|       | Alfalfa |          |                                                   |          |     |
| Liver | hay     | Positive | morphology of heart ventricle                     | 2.67E-06 | 71  |
|       | Alfalfa |          |                                                   |          |     |
| Liver | hay     | Positive | metastatic malignant neoplasm of digestive system | 2.71E-06 | 84  |
|       | Alfalfa |          |                                                   |          |     |
| Liver | hay     | Positive | growth of epithelial tissue                       | 2.71E-06 | 217 |
|       | Alfalfa |          |                                                   |          |     |
| Liver | hay     | Positive | adhesion of immune cells                          | 2.71E-06 | 119 |
|       | Alfalfa |          |                                                   |          |     |
| Liver | hay     | Positive | development of endothelial tissue                 | 2.77E-06 | 124 |
| Liver | Alfalfa | Positive | Organ Degeneration                                | 2.96E-06 | 162 |

|       |         |          |                                                 |          |      |
|-------|---------|----------|-------------------------------------------------|----------|------|
|       | hay     |          |                                                 |          |      |
|       | Alfalfa |          |                                                 |          |      |
| Liver | hay     | Positive | Huntington's Disease                            | 2.96E-06 | 186  |
|       | Alfalfa |          |                                                 |          |      |
| Liver | hay     | Positive | Growth Failure                                  | 2.98E-06 | 193  |
|       | Alfalfa |          |                                                 |          |      |
| Liver | hay     | Positive | apoptosis of hepatoma cell lines                | 3.08E-06 | 58   |
|       | Alfalfa |          |                                                 |          |      |
| Liver | hay     | Positive | Gastrointestinal Tract Cancer and Tumors        | 3.08E-06 | 1420 |
|       | Alfalfa |          |                                                 |          |      |
| Liver | hay     | Positive | metastatic gastrointestinal tract cancer        | 3.19E-06 | 80   |
|       | Alfalfa |          |                                                 |          |      |
| Liver | hay     | Positive | Lymphocyte homeostasis                          | 3.34E-06 | 177  |
|       | Alfalfa |          |                                                 |          |      |
| Liver | hay     | Positive | dyskinesia                                      | 3.44E-06 | 198  |
|       | Alfalfa |          |                                                 |          |      |
| Liver | hay     | Positive | migration of endothelial cells                  | 3.83E-06 | 112  |
|       | Alfalfa |          |                                                 |          |      |
| Liver | hay     | Positive | proliferation of hematopoietic progenitor cells | 3.93E-06 | 86   |
|       | Alfalfa |          |                                                 |          |      |
| Liver | hay     | Positive | phosphorylation of L-amino acid                 | 3.95E-06 | 79   |
|       | Alfalfa |          |                                                 |          |      |
| Liver | hay     | Positive | development of blood cells                      | 4.16E-06 | 208  |
|       | Alfalfa |          |                                                 |          |      |
| Liver | hay     | Positive | cell death of epithelial cell lines             | 4.16E-06 | 98   |
|       | Alfalfa |          |                                                 |          |      |
| Liver | hay     | Positive | proliferation of lymphatic system cells         | 4.19E-06 | 73   |
|       | Alfalfa |          |                                                 |          |      |
| Liver | hay     | Positive | morphology of lymphoid organ                    | 4.26E-06 | 131  |
|       | Alfalfa |          |                                                 |          |      |
| Liver | hay     | Positive | recruitment of phagocytes                       | 4.28E-06 | 87   |
|       | Alfalfa |          |                                                 |          |      |
| Liver | hay     | Positive | Neurodegeneration                               | 4.29E-06 | 106  |
|       | Alfalfa |          |                                                 |          |      |
| Liver | hay     | Positive | invasion of prostate cancer cell lines          | 4.29E-06 | 42   |
|       | Alfalfa |          |                                                 |          |      |
| Liver | hay     | Positive | metabolism of reactive oxygen species           | 4.40E-06 | 163  |
|       | Alfalfa |          |                                                 |          |      |
| Liver | hay     | Positive | gastrointestinal tract cancer                   | 4.82E-06 | 1396 |
|       | Alfalfa |          |                                                 |          |      |
| Liver | hay     | Positive | homeostasis of leukocytes                       | 4.96E-06 | 179  |
|       | Alfalfa |          |                                                 |          |      |
| Liver | hay     | Positive | morphology of bone                              | 4.96E-06 | 148  |
| Liver | Alfalfa | Positive | contractility of heart                          | 5.22E-06 | 65   |



|       |         |          |                                       |          |      |
|-------|---------|----------|---------------------------------------|----------|------|
|       | hay     |          |                                       |          |      |
|       | Alfalfa |          |                                       |          |      |
| Liver | hay     | Positive | quantity of T lymphocytes             | 5.35E-06 | 173  |
|       | Alfalfa |          |                                       |          |      |
| Liver | hay     | Positive | adhesion of blood cells               | 5.35E-06 | 126  |
|       | Alfalfa |          |                                       |          |      |
| Liver | hay     | Positive | proliferation of neuronal cells       | 5.35E-06 | 185  |
|       | Alfalfa |          |                                       |          |      |
| Liver | hay     | Positive | cell movement of endothelial cells    | 5.43E-06 | 119  |
|       | Alfalfa |          |                                       |          |      |
| Liver | hay     | Positive | endothelial cell development          | 5.43E-06 | 119  |
|       | Alfalfa |          |                                       |          |      |
| Liver | hay     | Positive | cell movement of granulocytes         | 5.43E-06 | 124  |
|       | Alfalfa |          |                                       |          |      |
| Liver | hay     | Positive | infection by lentivirus               | 5.61E-06 | 225  |
|       | Alfalfa |          |                                       |          |      |
| Liver | hay     | Positive | Bleeding                              | 5.80E-06 | 140  |
|       | Alfalfa |          |                                       |          |      |
| Liver | hay     | Positive | proliferation of hematopoietic cells  | 5.87E-06 | 89   |
|       | Alfalfa |          |                                       |          |      |
| Liver | hay     | Positive | recruitment of leukocytes             | 6.15E-06 | 110  |
|       | Alfalfa |          |                                       |          |      |
| Liver | hay     | Positive | protein kinase cascade                | 6.22E-06 | 139  |
|       | Alfalfa |          |                                       |          |      |
| Liver | hay     | Positive | development of lymphocytes            | 6.25E-06 | 178  |
|       | Alfalfa |          |                                       |          |      |
| Liver | hay     | Positive | replication of RNA virus              | 6.46E-06 | 164  |
|       | Alfalfa |          |                                       |          |      |
| Liver | hay     | Positive | HIV infection                         | 6.46E-06 | 224  |
|       | Alfalfa |          |                                       |          |      |
| Liver | hay     | Positive | development of sensory organ          | 6.46E-06 | 181  |
|       | Alfalfa |          |                                       |          |      |
| Liver | hay     | Positive | adenocarcinoma                        | 6.46E-06 | 1771 |
|       | Alfalfa |          |                                       |          |      |
| Liver | hay     | Positive | morphology of skin                    | 6.66E-06 | 94   |
|       | Alfalfa |          |                                       |          |      |
| Liver | hay     | Positive | development of mononuclear leukocytes | 6.84E-06 | 179  |
|       | Alfalfa |          |                                       |          |      |
| Liver | hay     | Positive | apoptosis of epithelial cells         | 6.84E-06 | 98   |
|       | Alfalfa |          |                                       |          |      |
| Liver | hay     | Positive | plasma cell dyscrasia                 | 7.13E-06 | 113  |
|       | Alfalfa |          |                                       |          |      |
| Liver | hay     | Positive | accumulation of cells                 | 7.21E-06 | 118  |
| Liver | Alfalfa | Positive | angiogenesis of tumor                 | 7.25E-06 | 47   |

|       |         |          |                                           |          |      |
|-------|---------|----------|-------------------------------------------|----------|------|
|       | hay     |          |                                           |          |      |
|       | Alfalfa |          |                                           |          |      |
| Liver | hay     | Positive | cell death of pheochromocytoma cell lines | 7.25E-06 | 47   |
|       | Alfalfa |          |                                           |          |      |
| Liver | hay     | Positive | congenital malformation of skeleton       | 7.50E-06 | 139  |
|       | Alfalfa |          |                                           |          |      |
| Liver | hay     | Positive | proliferation of mononuclear leukocytes   | 7.50E-06 | 231  |
|       | Alfalfa |          |                                           |          |      |
| Liver | hay     | Positive | neuromuscular disease                     | 8.07E-06 | 272  |
|       | Alfalfa |          |                                           |          |      |
| Liver | hay     | Positive | quantity of antigen presenting cells      | 8.16E-06 | 95   |
|       | Alfalfa |          |                                           |          |      |
| Liver | hay     | Positive | apoptosis of cardiomyocytes               | 8.16E-06 | 67   |
|       | Alfalfa |          |                                           |          |      |
| Liver | hay     | Positive | metabolism of phospholipid                | 8.29E-06 | 82   |
|       | Alfalfa |          |                                           |          |      |
| Liver | hay     | Positive | recruitment of cells                      | 8.39E-06 | 119  |
|       | Alfalfa |          |                                           |          |      |
| Liver | hay     | Positive | adenoma                                   | 8.56E-06 | 177  |
|       | Alfalfa |          |                                           |          |      |
| Liver | hay     | Positive | interphase                                | 8.74E-06 | 207  |
|       | Alfalfa |          |                                           |          |      |
| Liver | hay     | Positive | perinatal death                           | 9.02E-06 | 189  |
|       | Alfalfa |          |                                           |          |      |
| Liver | hay     | Positive | breast or ovarian cancer                  | 9.25E-06 | 555  |
|       | Alfalfa |          |                                           |          |      |
| Liver | hay     | Positive | secondary neoplasm of digestive system    | 9.25E-06 | 88   |
|       | Alfalfa |          |                                           |          |      |
| Liver | hay     | Positive | abdominal adenocarcinoma                  | 9.31E-06 | 1614 |
|       | Alfalfa |          |                                           |          |      |
| Liver | hay     | Positive | intestinal tumor                          | 9.78E-06 | 1208 |
|       | Alfalfa |          |                                           |          |      |
| Liver | hay     | Positive | adhesion of tumor cell lines              | 9.99E-06 | 98   |
|       | Alfalfa |          |                                           |          |      |
| Liver | hay     | Positive | proliferation of lymphocytes              | 9.99E-06 | 227  |
|       | Alfalfa |          |                                           |          |      |
| Liver | hay     | Positive | congenital anomaly of skin                | 1.02E-05 | 65   |
|       | Alfalfa |          |                                           |          |      |
| Liver | hay     | Positive | abnormal morphology of lymphoid organ     | 1.08E-05 | 125  |
|       | Alfalfa |          |                                           |          |      |
| Liver | hay     | Positive | apoptosis of heart cells                  | 1.11E-05 | 68   |
|       | Alfalfa |          |                                           |          |      |
| Liver | hay     | Positive | cell death of hepatoma cell lines         | 1.11E-05 | 62   |
| Liver | Alfalfa | Positive | metabolism of phosphatidic acid           | 1.11E-05 | 62   |

|       |         |          |                                              |          |      |
|-------|---------|----------|----------------------------------------------|----------|------|
|       | hay     |          |                                              |          |      |
|       | Alfalfa |          |                                              |          |      |
| Liver | hay     | Positive | apoptosis of cervical cancer cell lines      | 1.13E-05 | 96   |
|       | Alfalfa |          |                                              |          |      |
| Liver | hay     | Positive | morphology of blood cells                    | 1.13E-05 | 136  |
|       | Alfalfa |          |                                              |          |      |
| Liver | hay     | Positive | cell death of blood cells                    | 1.13E-05 | 217  |
|       | Alfalfa |          |                                              |          |      |
| Liver | hay     | Positive | female genital tract serous cancer           | 1.14E-05 | 127  |
|       | Alfalfa |          |                                              |          |      |
| Liver | hay     | Positive | cell movement of fibroblasts                 | 1.17E-05 | 66   |
|       | Alfalfa |          |                                              |          |      |
| Liver | hay     | Positive | concentration of phospholipid                | 1.17E-05 | 66   |
|       | Alfalfa |          |                                              |          |      |
| Liver | hay     | Positive | accumulation of lipid                        | 1.19E-05 | 101  |
|       | Alfalfa |          |                                              |          |      |
| Liver | hay     | Positive | dysmyelination                               | 1.21E-05 | 51   |
|       | Alfalfa |          |                                              |          |      |
| Liver | hay     | Positive | colorectal neoplasia                         | 1.25E-05 | 1203 |
|       | Alfalfa |          |                                              |          |      |
| Liver | hay     | Positive | vascularization                              | 1.26E-05 | 82   |
|       | Alfalfa |          |                                              |          |      |
| Liver | hay     | Positive | apoptosis of connective tissue cells         | 1.27E-05 | 100  |
|       | Alfalfa |          |                                              |          |      |
| Liver | hay     | Positive | infection by RNA virus                       | 1.28E-05 | 266  |
|       | Alfalfa |          |                                              |          |      |
| Liver | hay     | Positive | differentiation of epithelial tissue         | 1.28E-05 | 119  |
|       | Alfalfa |          |                                              |          |      |
| Liver | hay     | Positive | activation of cells                          | 1.37E-05 | 297  |
|       | Alfalfa |          |                                              |          |      |
| Liver | hay     | Positive | small GTPase mediated signal transduction    | 1.38E-05 | 66   |
|       | Alfalfa |          |                                              |          |      |
| Liver | hay     | Positive | synthesis of nitric oxide                    | 1.44E-05 | 94   |
|       | Alfalfa |          |                                              |          |      |
| Liver | hay     | Positive | quantity of phagocytes                       | 1.45E-05 | 138  |
|       | Alfalfa |          |                                              |          |      |
| Liver | hay     | Positive | degeneration of nervous system               | 1.55E-05 | 97   |
|       | Alfalfa |          |                                              |          |      |
| Liver | hay     | Positive | replication of virus                         | 1.55E-05 | 178  |
|       | Alfalfa |          |                                              |          |      |
| Liver | hay     | Positive | apoptosis of epithelial cell lines           | 1.55E-05 | 78   |
|       | Alfalfa |          |                                              |          |      |
| Liver | hay     | Positive | function of lymphocytes                      | 1.56E-05 | 113  |
| Liver | Alfalfa | Positive | cell viability of cervical cancer cell lines | 1.64E-05 | 77   |

|       |         |          |                                           |          |     |
|-------|---------|----------|-------------------------------------------|----------|-----|
|       | hay     |          |                                           |          |     |
|       | Alfalfa |          |                                           |          |     |
| Liver | hay     | Positive | paralysis                                 | 1.65E-05 | 60  |
|       | Alfalfa |          |                                           |          |     |
| Liver | hay     | Positive | differentiation of embryonic tissue       | 1.68E-05 | 87  |
|       | Alfalfa |          |                                           |          |     |
| Liver | hay     | Positive | demyelination                             | 1.73E-05 | 46  |
|       | Alfalfa |          |                                           |          |     |
| Liver | hay     | Positive | binding of DNA                            | 1.73E-05 | 166 |
|       | Alfalfa |          |                                           |          |     |
| Liver | hay     | Positive | proliferation of tumor cells              | 1.77E-05 | 151 |
|       | Alfalfa |          |                                           |          |     |
| Liver | hay     | Positive | concentration of acylglycerol             | 1.79E-05 | 111 |
|       | Alfalfa |          |                                           |          |     |
| Liver | hay     | Positive | cell death of tumor                       | 1.79E-05 | 125 |
|       | Alfalfa |          |                                           |          |     |
| Liver | hay     | Positive | migration of tumor cells                  | 1.79E-05 | 78  |
|       | Alfalfa |          |                                           |          |     |
| Liver | hay     | Positive | cell death of skin                        | 1.79E-05 | 41  |
|       | Alfalfa |          |                                           |          |     |
| Liver | hay     | Positive | autophagy of cells                        | 1.81E-05 | 90  |
|       | Alfalfa |          |                                           |          |     |
| Liver | hay     | Positive | abnormal morphology of bone               | 1.88E-05 | 141 |
|       | Alfalfa |          |                                           |          |     |
| Liver | hay     | Positive | ubiquitination of protein                 | 1.90E-05 | 110 |
|       | Alfalfa |          |                                           |          |     |
| Liver | hay     | Positive | differentiation of tumor cell lines       | 1.91E-05 | 124 |
|       | Alfalfa |          |                                           |          |     |
| Liver | hay     | Positive | Encephalitis                              | 1.94E-05 | 99  |
|       | Alfalfa |          |                                           |          |     |
| Liver | hay     | Positive | formation of filopodia                    | 1.94E-05 | 60  |
|       | Alfalfa |          |                                           |          |     |
| Liver | hay     | Positive | proliferation of embryonic cells          | 2.15E-05 | 85  |
|       | Alfalfa |          |                                           |          |     |
| Liver | hay     | Positive | keratosis                                 | 2.15E-05 | 46  |
|       | Alfalfa |          |                                           |          |     |
| Liver | hay     | Positive | development of lymphatic system component | 2.15E-05 | 103 |
|       | Alfalfa |          |                                           |          |     |
| Liver | hay     | Positive | synthesis of DNA                          | 2.17E-05 | 135 |
|       | Alfalfa |          |                                           |          |     |
| Liver | hay     | Positive | cellular infiltration by granulocytes     | 2.17E-05 | 74  |
|       | Alfalfa |          |                                           |          |     |
| Liver | hay     | Positive | inflammation of central nervous system    | 2.17E-05 | 101 |
| Liver | Alfalfa | Positive | abnormal morphology of heart              | 2.18E-05 | 125 |

|       |         |          |                                         |          |      |
|-------|---------|----------|-----------------------------------------|----------|------|
|       | hay     |          |                                         |          |      |
|       | Alfalfa |          |                                         |          |      |
| Liver | hay     | Positive | development of lymphatic system         | 2.27E-05 | 117  |
|       | Alfalfa |          |                                         |          |      |
| Liver | hay     | Positive | necrosis of tumor                       | 2.35E-05 | 124  |
|       | Alfalfa |          |                                         |          |      |
| Liver | hay     | Positive | contractility of heart ventricle        | 2.36E-05 | 32   |
|       | Alfalfa |          |                                         |          |      |
| Liver | hay     | Positive | cell movement of mononuclear leukocytes | 2.39E-05 | 148  |
|       | Alfalfa |          |                                         |          |      |
| Liver | hay     | Positive | ubiquitination                          | 2.49E-05 | 111  |
|       | Alfalfa |          |                                         |          |      |
| Liver | hay     | Positive | melanoma                                | 2.61E-05 | 1798 |
|       | Alfalfa |          |                                         |          |      |
| Liver | hay     | Positive | development of connective tissue        | 2.64E-05 | 121  |
|       | Alfalfa |          |                                         |          |      |
| Liver | hay     | Positive | cell death of immune cells              | 2.67E-05 | 205  |
|       | Alfalfa |          |                                         |          |      |
| Liver | hay     | Positive | differentiation of connective tissue    | 2.68E-05 | 225  |
|       | Alfalfa |          |                                         |          |      |
| Liver | hay     | Positive | stress response of cells                | 2.73E-05 | 51   |
|       | Alfalfa |          |                                         |          |      |
| Liver | hay     | Positive | apoptosis of dermal cells               | 2.76E-05 | 36   |
|       | Alfalfa |          |                                         |          |      |
| Liver | hay     | Positive | epileptic seizure                       | 2.77E-05 | 60   |
|       | Alfalfa |          |                                         |          |      |
| Liver | hay     | Positive | infiltration by neutrophils             | 2.85E-05 | 59   |
|       | Alfalfa |          |                                         |          |      |
| Liver | hay     | Positive | migration of prostate cancer cell lines | 2.91E-05 | 41   |
|       | Alfalfa |          |                                         |          |      |
| Liver | hay     | Positive | blood protein disorder                  | 3.02E-05 | 122  |
|       | Alfalfa |          |                                         |          |      |
| Liver | hay     | Positive | arrest in interphase                    | 3.14E-05 | 134  |
|       | Alfalfa |          |                                         |          |      |
| Liver | hay     | Positive | cell death of embryonic cells           | 3.23E-05 | 44   |
|       | Alfalfa |          |                                         |          |      |
| Liver | hay     | Positive | contractility of cardiac muscle         | 3.27E-05 | 53   |
|       | Alfalfa |          |                                         |          |      |
| Liver | hay     | Positive | proliferation of myeloid cells          | 3.28E-05 | 45   |
|       | Alfalfa |          |                                         |          |      |
| Liver | hay     | Positive | transactivation of RNA                  | 3.30E-05 | 171  |
|       | Alfalfa |          |                                         |          |      |
| Liver | hay     | Positive | craniofacial abnormality                | 3.38E-05 | 116  |
| Liver | Alfalfa | Positive | export of molecule                      | 3.38E-05 | 98   |

|       |         |          |                                          |          |      |
|-------|---------|----------|------------------------------------------|----------|------|
|       | hay     |          |                                          |          |      |
|       | Alfalfa |          |                                          |          |      |
| Liver | hay     | Positive | metastatic solid tumor                   | 3.52E-05 | 139  |
|       | Alfalfa |          |                                          |          |      |
| Liver | hay     | Positive | proliferation of smooth muscle cells     | 3.67E-05 | 95   |
|       | Alfalfa |          |                                          |          |      |
| Liver | hay     | Positive | inflammatory response                    | 3.67E-05 | 238  |
|       | Alfalfa |          |                                          |          |      |
| Liver | hay     | Positive | intestinal cancer                        | 3.79E-05 | 1183 |
|       | Alfalfa |          |                                          |          |      |
| Liver | hay     | Positive | immune response of cells                 | 3.83E-05 | 179  |
|       | Alfalfa |          |                                          |          |      |
| Liver | hay     | Positive | gastrointestinal carcinoma               | 3.84E-05 | 1245 |
|       | Alfalfa |          |                                          |          |      |
| Liver | hay     | Positive | recruitment of neutrophils               | 3.84E-05 | 65   |
|       | Alfalfa |          |                                          |          |      |
| Liver | hay     | Positive | development of abdomen                   | 3.85E-05 | 181  |
|       | Alfalfa |          |                                          |          |      |
| Liver | hay     | Positive | apoptosis of skin                        | 3.86E-05 | 37   |
|       | Alfalfa |          |                                          |          |      |
| Liver | hay     | Positive | morphology of leukocytes                 | 4.02E-05 | 112  |
|       | Alfalfa |          |                                          |          |      |
| Liver | hay     | Positive | morphology of head                       | 4.08E-05 | 265  |
|       | Alfalfa |          |                                          |          |      |
| Liver | hay     | Positive | cell movement of connective tissue cells | 4.08E-05 | 76   |
|       | Alfalfa |          |                                          |          |      |
| Liver | hay     | Positive | cell death of dermal cells               | 4.10E-05 | 38   |
|       | Alfalfa |          |                                          |          |      |
| Liver | hay     | Positive | growth of plasma membrane projections    | 4.12E-05 | 148  |
|       | Alfalfa |          |                                          |          |      |
| Liver | hay     | Positive | concentration of fatty acid              | 4.13E-05 | 93   |
|       | Alfalfa |          |                                          |          |      |
| Liver | hay     | Positive | apoptosis of neurons                     | 4.19E-05 | 139  |
|       | Alfalfa |          |                                          |          |      |
| Liver | hay     | Positive | cell movement of lymphocytes             | 4.24E-05 | 127  |
|       | Alfalfa |          |                                          |          |      |
| Liver | hay     | Positive | apoptosis of sarcoma cell lines          | 4.25E-05 | 66   |
|       | Alfalfa |          |                                          |          |      |
| Liver | hay     | Positive | cell death of bone cancer cell lines     | 4.25E-05 | 62   |
|       | Alfalfa |          |                                          |          |      |
| Liver | hay     | Positive | synthesis of phospholipid                | 4.25E-05 | 62   |
|       | Alfalfa |          |                                          |          |      |
| Liver | hay     | Positive | metastasis of cells                      | 4.36E-05 | 84   |
| Liver | Alfalfa | Positive | advanced stage solid tumor               | 4.52E-05 | 162  |

|       |         |          |                                            |          |      |
|-------|---------|----------|--------------------------------------------|----------|------|
|       | hay     |          |                                            |          |      |
|       | Alfalfa |          |                                            |          |      |
| Liver | hay     | Positive | demyelination of central nervous system    | 4.62E-05 | 21   |
|       | Alfalfa |          |                                            |          |      |
| Liver | hay     | Positive | apoptosis of pheochromocytoma cell lines   | 4.63E-05 | 36   |
|       | Alfalfa |          |                                            |          |      |
| Liver | hay     | Positive | quantity of bone                           | 4.64E-05 | 83   |
|       | Alfalfa |          |                                            |          |      |
| Liver | hay     | Positive | cell death of tumor cells                  | 4.66E-05 | 120  |
|       | Alfalfa |          |                                            |          |      |
| Liver | hay     | Positive | autosomal dominant disease                 | 4.67E-05 | 197  |
|       | Alfalfa |          |                                            |          |      |
| Liver | hay     | Positive | abnormal morphology of skin                | 4.94E-05 | 82   |
|       | Alfalfa |          |                                            |          |      |
| Liver | hay     | Positive | quantity of reactive oxygen species        | 5.03E-05 | 62   |
|       | Alfalfa |          |                                            |          |      |
| Liver | hay     | Positive | abnormal morphology of leukocytes          | 5.04E-05 | 77   |
|       | Alfalfa |          |                                            |          |      |
| Liver | hay     | Positive | quantity of IL-6 in blood                  | 5.19E-05 | 34   |
|       | Alfalfa |          |                                            |          |      |
| Liver | hay     | Positive | colorectal cancer                          | 5.27E-05 | 1179 |
|       | Alfalfa |          |                                            |          |      |
| Liver | hay     | Positive | abnormal morphology of head                | 5.29E-05 | 252  |
|       | Alfalfa |          |                                            |          |      |
| Liver | hay     | Positive | cleavage of cells                          | 5.35E-05 | 55   |
|       | Alfalfa |          |                                            |          |      |
| Liver | hay     | Positive | quantity of B lymphocytes                  | 5.46E-05 | 112  |
|       | Alfalfa |          |                                            |          |      |
| Liver | hay     | Positive | migration of cancer cells                  | 5.53E-05 | 67   |
|       | Alfalfa |          |                                            |          |      |
| Liver | hay     | Positive | infection of cells                         | 5.60E-05 | 242  |
|       | Alfalfa |          |                                            |          |      |
| Liver | hay     | Positive | differentiation of bone                    | 5.62E-05 | 131  |
|       | Alfalfa |          |                                            |          |      |
| Liver | hay     | Positive | growth of neurites                         | 5.62E-05 | 146  |
|       | Alfalfa |          |                                            |          |      |
| Liver | hay     | Positive | cell death of fibroblasts                  | 5.63E-05 | 88   |
|       | Alfalfa |          |                                            |          |      |
| Liver | hay     | Positive | cell death of heart                        | 5.75E-05 | 77   |
|       | Alfalfa |          |                                            |          |      |
| Liver | hay     | Positive | differentiation of connective tissue cells | 5.82E-05 | 198  |
|       | Alfalfa |          |                                            |          |      |
| Liver | hay     | Positive | quantity of epithelial tissue              | 5.86E-05 | 62   |
| Liver | Alfalfa | Positive | quantity of lymphatic system cells         | 5.90E-05 | 91   |

|       |         |          |                                               |          |     |
|-------|---------|----------|-----------------------------------------------|----------|-----|
|       | hay     |          |                                               |          |     |
|       | Alfalfa |          |                                               |          |     |
| Liver | hay     | Positive | necrosis of cardiac muscle                    | 5.90E-05 | 74  |
|       | Alfalfa |          |                                               |          |     |
| Liver | hay     | Positive | size of embryo                                | 5.95E-05 | 115 |
|       | Alfalfa |          |                                               |          |     |
| Liver | hay     | Positive | morphology of reproductive system             | 5.95E-05 | 167 |
|       | Alfalfa |          |                                               |          |     |
| Liver | hay     | Positive | cell death of B-lymphocyte derived cell lines | 6.02E-05 | 47  |
|       | Alfalfa |          |                                               |          |     |
| Liver | hay     | Positive | abnormal morphology of muscle                 | 6.64E-05 | 103 |
|       | Alfalfa |          |                                               |          |     |
| Liver | hay     | Positive | quantity of granulocytes                      | 6.64E-05 | 103 |
|       | Alfalfa |          |                                               |          |     |
| Liver | hay     | Positive | quantity of diacylglycerol                    | 6.80E-05 | 25  |
|       | Alfalfa |          |                                               |          |     |
| Liver | hay     | Positive | development of gastrointestinal tract         | 6.80E-05 | 87  |
|       | Alfalfa |          |                                               |          |     |
| Liver | hay     | Positive | hypersensitive reaction                       | 6.80E-05 | 136 |
|       | Alfalfa |          |                                               |          |     |
| Liver | hay     | Positive | size of animal                                | 6.88E-05 | 62  |
|       | Alfalfa |          |                                               |          |     |
| Liver | hay     | Positive | proliferation of hepatoma cell lines          | 7.07E-05 | 68  |
|       | Alfalfa |          |                                               |          |     |
| Liver | hay     | Positive | serous neoplasm                               | 7.14E-05 | 188 |
|       | Alfalfa |          |                                               |          |     |
| Liver | hay     | Positive | abnormal morphology of reproductive system    | 7.14E-05 | 159 |
|       | Alfalfa |          |                                               |          |     |
| Liver | hay     | Positive | formation of leukocytes                       | 7.32E-05 | 56  |
|       | Alfalfa |          |                                               |          |     |
| Liver | hay     | Positive | activation of neuroglia                       | 7.32E-05 | 48  |
|       | Alfalfa |          |                                               |          |     |
| Liver | hay     | Positive | colony formation of cells                     | 7.36E-05 | 154 |
|       | Alfalfa |          |                                               |          |     |
| Liver | hay     | Positive | cell death of neuroglia                       | 7.41E-05 | 44  |
|       | Alfalfa |          |                                               |          |     |
| Liver | hay     | Positive | growth of lymphoid organ                      | 7.43E-05 | 60  |
|       | Alfalfa |          |                                               |          |     |
| Liver | hay     | Positive | cognition                                     | 7.59E-05 | 143 |
|       | Alfalfa |          |                                               |          |     |
| Liver | hay     | Positive | differentiation of T lymphocytes              | 7.83E-05 | 121 |
|       | Alfalfa |          |                                               |          |     |
| Liver | hay     | Positive | proliferation of fibroblast cell lines        | 7.83E-05 | 134 |
| Liver | Alfalfa | Positive | formation of muscle cells                     | 8.04E-05 | 62  |



|       |         |          |                                     |          |     |
|-------|---------|----------|-------------------------------------|----------|-----|
|       | hay     |          |                                     |          |     |
|       | Alfalfa |          |                                     |          |     |
| Liver | hay     | Positive | proliferation of T lymphocytes      | 8.25E-05 | 186 |
|       | Alfalfa |          |                                     |          |     |
| Liver | hay     | Positive | Dermatitis                          | 8.27E-05 | 137 |
|       | Alfalfa |          |                                     |          |     |
| Liver | hay     | Positive | organization of actin cytoskeleton  | 8.33E-05 | 98  |
|       | Alfalfa |          |                                     |          |     |
| Liver | hay     | Positive | arthropathy                         | 8.33E-05 | 284 |
|       | Alfalfa |          |                                     |          |     |
| Liver | hay     | Positive | morphology of respiratory system    | 8.41E-05 | 101 |
|       | Alfalfa |          |                                     |          |     |
| Liver | hay     | Positive | proliferation of endothelial cells  | 8.41E-05 | 101 |
|       | Alfalfa |          |                                     |          |     |
| Liver | hay     | Positive | behavior                            | 8.41E-05 | 294 |
|       | Alfalfa |          |                                     |          |     |
| Liver | hay     | Positive | differentiation of bone cells       | 8.48E-05 | 129 |
|       | Alfalfa |          |                                     |          |     |
| Liver | hay     | Positive | cytostasis of tumor cell lines      | 8.58E-05 | 56  |
|       | Alfalfa |          |                                     |          |     |
| Liver | hay     | Positive | morphology of cardiovascular tissue | 8.59E-05 | 34  |
|       | Alfalfa |          |                                     |          |     |
| Liver | hay     | Positive | encephalomyelitis                   | 8.61E-05 | 85  |
|       | Alfalfa |          |                                     |          |     |
| Liver | hay     | Positive | apoptosis of cerebral cortex cells  | 8.64E-05 | 40  |
|       | Alfalfa |          |                                     |          |     |
| Liver | hay     | Positive | cell death of heart cells           | 8.84E-05 | 74  |
|       | Alfalfa |          |                                     |          |     |
| Liver | hay     | Positive | function of cardiac muscle          | 8.84E-05 | 63  |
|       | Alfalfa |          |                                     |          |     |
| Liver | hay     | Positive | quantity of protein in blood        | 8.89E-05 | 158 |
|       | Alfalfa |          |                                     |          |     |
| Liver | hay     | Positive | learning                            | 8.91E-05 | 132 |
|       | Alfalfa |          |                                     |          |     |
| Liver | hay     | Positive | abnormal morphology of lymphocytes  | 8.95E-05 | 59  |
|       | Alfalfa |          |                                     |          |     |
| Liver | hay     | Positive | inflammation of organ               | 9.28E-05 | 345 |
|       | Alfalfa |          |                                     |          |     |
| Liver | hay     | Positive | production of antibody              | 9.29E-05 | 101 |
|       | Alfalfa |          |                                     |          |     |
| Liver | hay     | Positive | breast cancer                       | 9.48E-05 | 441 |
|       | Alfalfa |          |                                     |          |     |
| Liver | hay     | Positive | cell death of embryonic stem cells  | 9.51E-05 | 22  |
| Liver | Alfalfa | Positive | cell death of cardiomyocytes        | 9.91E-05 | 72  |

|       |         |          |                                           |          |      |
|-------|---------|----------|-------------------------------------------|----------|------|
|       | hay     |          |                                           |          |      |
|       | Alfalfa |          |                                           |          |      |
| Liver | hay     | Positive | quantity of hematopoietic cells           | 1.01E-04 | 139  |
|       | Alfalfa |          |                                           |          |      |
| Liver | hay     | Positive | quantity of lymphatic system component    | 1.01E-04 | 120  |
|       | Alfalfa |          |                                           |          |      |
| Liver | hay     | Positive | formation of lymphatic system component   | 1.01E-04 | 95   |
|       | Alfalfa |          |                                           |          |      |
| Liver | hay     | Positive | infection by HIV-1                        | 1.01E-04 | 187  |
|       | Alfalfa |          |                                           |          |      |
| Liver | hay     | Positive | development of central nervous system     | 1.01E-04 | 195  |
|       | Alfalfa |          |                                           |          |      |
| Liver | hay     | Positive | colony formation                          | 1.01E-04 | 166  |
|       | Alfalfa |          |                                           |          |      |
| Liver | hay     | Positive | Breast Cancer and Tumors                  | 1.01E-04 | 442  |
|       | Alfalfa |          |                                           |          |      |
| Liver | hay     | Positive | apoptosis of muscle                       | 1.02E-04 | 86   |
|       | Alfalfa |          |                                           |          |      |
| Liver | hay     | Positive | apoptosis of endothelial cells            | 1.02E-04 | 63   |
|       | Alfalfa |          |                                           |          |      |
| Liver | hay     | Positive | cell death of carcinoma cell lines        | 1.02E-04 | 93   |
|       | Alfalfa |          |                                           |          |      |
| Liver | hay     | Positive | morphology of nervous system              | 1.06E-04 | 236  |
|       | Alfalfa |          |                                           |          |      |
| Liver | hay     | Positive | growth of skin                            | 1.06E-04 | 73   |
|       | Alfalfa |          |                                           |          |      |
| Liver | hay     | Positive | cell movement of muscle cells             | 1.06E-04 | 62   |
|       | Alfalfa |          |                                           |          |      |
| Liver | hay     | Positive | migration of connective tissue cells      | 1.06E-04 | 62   |
|       | Alfalfa |          |                                           |          |      |
| Liver | hay     | Positive | activation of enzyme                      | 1.06E-04 | 123  |
|       | Alfalfa |          |                                           |          |      |
| Liver | hay     | Positive | abdominal carcinoma                       | 1.07E-04 | 1621 |
|       | Alfalfa |          |                                           |          |      |
| Liver | hay     | Positive | hemorrhagic disease                       | 1.09E-04 | 83   |
|       | Alfalfa |          |                                           |          |      |
| Liver | hay     | Positive | neuritogenesis                            | 1.14E-04 | 179  |
|       | Alfalfa |          |                                           |          |      |
| Liver | hay     | Positive | accumulation of blood cells               | 1.17E-04 | 91   |
|       | Alfalfa |          |                                           |          |      |
| Liver | hay     | Positive | hypertrophy of heart                      | 1.18E-04 | 108  |
|       | Alfalfa |          |                                           |          |      |
| Liver | hay     | Positive | abnormal morphology of respiratory system | 1.18E-04 | 99   |
| Liver | Alfalfa | Positive | cell movement of tumor cells              | 1.18E-04 | 63   |

|       |         |          |                                            |          |     |
|-------|---------|----------|--------------------------------------------|----------|-----|
|       | hay     |          |                                            |          |     |
|       | Alfalfa |          |                                            |          |     |
| Liver | hay     | Positive | cell death of myeloma cell lines           | 1.20E-04 | 36  |
|       | Alfalfa |          |                                            |          |     |
| Liver | hay     | Positive | degeneration of muscle cells               | 1.22E-04 | 23  |
|       | Alfalfa |          |                                            |          |     |
| Liver | hay     | Positive | synthesis of phosphatidic acid             | 1.23E-04 | 49  |
|       | Alfalfa |          |                                            |          |     |
| Liver | hay     | Positive | movement of vascular endothelial cells     | 1.24E-04 | 62  |
|       | Alfalfa |          |                                            |          |     |
| Liver | hay     | Positive | quantity of hematopoietic progenitor cells | 1.27E-04 | 138 |
|       | Alfalfa |          |                                            |          |     |
| Liver | hay     | Positive | ion homeostasis of cells                   | 1.29E-04 | 171 |
|       | Alfalfa |          |                                            |          |     |
| Liver | hay     | Positive | damage of epithelial tissue                | 1.29E-04 | 39  |
|       | Alfalfa |          |                                            |          |     |
| Liver | hay     | Positive | phagocytosis                               | 1.29E-04 | 96  |
|       | Alfalfa |          |                                            |          |     |
| Liver | hay     | Positive | apoptosis of fibrosarcoma cell lines       | 1.29E-04 | 25  |
|       | Alfalfa |          |                                            |          |     |
| Liver | hay     | Positive | experimental autoimmune encephalomyelitis  | 1.29E-04 | 84  |
|       | Alfalfa |          |                                            |          |     |
| Liver | hay     | Positive | morphogenesis of head                      | 1.29E-04 | 84  |
|       | Alfalfa |          |                                            |          |     |
| Liver | hay     | Positive | quantity of lymphoid organ                 | 1.30E-04 | 99  |
|       | Alfalfa |          |                                            |          |     |
| Liver | hay     | Positive | myelination                                | 1.35E-04 | 66  |
|       | Alfalfa |          |                                            |          |     |
| Liver | hay     | Positive | abnormal morphology of heart ventricle     | 1.35E-04 | 60  |
|       | Alfalfa |          |                                            |          |     |
| Liver | hay     | Positive | apoptosis of muscle cells                  | 1.37E-04 | 85  |
|       | Alfalfa |          |                                            |          |     |
| Liver | hay     | Positive | differentiation of lymphocytes             | 1.37E-04 | 154 |
|       | Alfalfa |          |                                            |          |     |
| Liver | hay     | Positive | generation of leukocytes                   | 1.37E-04 | 56  |
|       | Alfalfa |          |                                            |          |     |
| Liver | hay     | Positive | apoptosis of colon cancer cell lines       | 1.39E-04 | 79  |
|       | Alfalfa |          |                                            |          |     |
| Liver | hay     | Positive | Hypertrophy                                | 1.39E-04 | 147 |
|       | Alfalfa |          |                                            |          |     |
| Liver | hay     | Positive | apoptosis of liver                         | 1.42E-04 | 55  |
|       | Alfalfa |          |                                            |          |     |
| Liver | hay     | Positive | production of protein                      | 1.44E-04 | 105 |
| Liver | Alfalfa | Positive | cell death of epidermal cells              | 1.44E-04 | 35  |

|       |         |          |                                             |          |     |
|-------|---------|----------|---------------------------------------------|----------|-----|
|       | hay     |          |                                             |          |     |
|       | Alfalfa |          |                                             |          |     |
| Liver | hay     | Positive | morphology of artery                        | 1.48E-04 | 54  |
|       | Alfalfa |          |                                             |          |     |
| Liver | hay     | Positive | quantity of connective tissue cells         | 1.48E-04 | 78  |
|       | Alfalfa |          |                                             |          |     |
| Liver | hay     | Positive | mass of heart                               | 1.48E-04 | 48  |
|       | Alfalfa |          |                                             |          |     |
| Liver | hay     | Positive | vascularization of body region              | 1.48E-04 | 48  |
|       | Alfalfa |          |                                             |          |     |
| Liver | hay     | Positive | apoptosis of hepatocytes                    | 1.52E-04 | 47  |
|       | Alfalfa |          |                                             |          |     |
| Liver | hay     | Positive | function of T lymphocytes                   | 1.53E-04 | 85  |
|       | Alfalfa |          |                                             |          |     |
| Liver | hay     | Positive | quantity of cytokine                        | 1.55E-04 | 83  |
|       | Alfalfa |          |                                             |          |     |
| Liver | hay     | Positive | cell movement of prostate cancer cell lines | 1.57E-04 | 45  |
|       | Alfalfa |          |                                             |          |     |
| Liver | hay     | Positive | apoptosis of myeloma cell lines             | 1.58E-04 | 32  |
|       | Alfalfa |          |                                             |          |     |
| Liver | hay     | Positive | apoptosis of neuroblastoma cell lines       | 1.59E-04 | 44  |
|       | Alfalfa |          |                                             |          |     |
| Liver | hay     | Positive | neovascularization                          | 1.60E-04 | 56  |
|       | Alfalfa |          |                                             |          |     |
| Liver | hay     | Positive | cell death of neuroblastoma cell lines      | 1.63E-04 | 65  |
|       | Alfalfa |          |                                             |          |     |
| Liver | hay     | Positive | morphology of lymphocytes                   | 1.63E-04 | 65  |
|       | Alfalfa |          |                                             |          |     |
| Liver | hay     | Positive | adhesion of mononuclear leukocytes          | 1.63E-04 | 51  |
|       | Alfalfa |          |                                             |          |     |
| Liver | hay     | Positive | cell death of breast cancer cell lines      | 1.63E-04 | 106 |
|       | Alfalfa |          |                                             |          |     |
| Liver | hay     | Positive | growth of embryonic tissue                  | 1.65E-04 | 89  |
|       | Alfalfa |          |                                             |          |     |
| Liver | hay     | Positive | apoptosis of epidermal cells                | 1.66E-04 | 33  |
|       | Alfalfa |          |                                             |          |     |
| Liver | hay     | Positive | abnormal morphology of nervous system       | 1.67E-04 | 218 |
|       | Alfalfa |          |                                             |          |     |
| Liver | hay     | Positive | apoptosis of tumor cells                    | 1.68E-04 | 92  |
|       | Alfalfa |          |                                             |          |     |
| Liver | hay     | Positive | concentration of sterol                     | 1.70E-04 | 98  |
|       | Alfalfa |          |                                             |          |     |
| Liver | hay     | Positive | function of phagocytes                      | 1.70E-04 | 98  |
| Liver | Alfalfa | Positive | quantity of interleukin                     | 1.72E-04 | 49  |

|       |         |          |                                              |          |     |
|-------|---------|----------|----------------------------------------------|----------|-----|
|       | hay     |          |                                              |          |     |
|       | Alfalfa |          |                                              |          |     |
| Liver | hay     | Positive | apoptosis of liver cells                     | 1.72E-04 | 54  |
|       | Alfalfa |          |                                              |          |     |
| Liver | hay     | Positive | estrous cycle                                | 1.75E-04 | 30  |
|       | Alfalfa |          |                                              |          |     |
| Liver | hay     | Positive | cell death of muscle                         | 1.76E-04 | 109 |
|       | Alfalfa |          |                                              |          |     |
| Liver | hay     | Positive | cellular infiltration of phagocytes          | 1.81E-04 | 60  |
|       | Alfalfa |          |                                              |          |     |
| Liver | hay     | Positive | abnormal morphology of interalveolar septa   | 1.81E-04 | 19  |
|       | Alfalfa |          |                                              |          |     |
| Liver | hay     | Positive | formation of connective tissue cells         | 1.85E-04 | 70  |
|       | Alfalfa |          |                                              |          |     |
| Liver | hay     | Positive | apoptosis of fibroblasts                     | 1.87E-04 | 72  |
|       | Alfalfa |          |                                              |          |     |
| Liver | hay     | Positive | uterine serous papillary cancer              | 1.88E-04 | 76  |
|       | Alfalfa |          |                                              |          |     |
| Liver | hay     | Positive | quantity of immunoglobulin                   | 1.88E-04 | 95  |
|       | Alfalfa |          |                                              |          |     |
| Liver | hay     | Positive | apoptosis of B-lymphocyte derived cell lines | 1.91E-04 | 44  |
|       | Alfalfa |          |                                              |          |     |
| Liver | hay     | Positive | morphology of genital organ                  | 1.91E-04 | 132 |
|       | Alfalfa |          |                                              |          |     |
| Liver | hay     | Positive | dysgenesis                                   | 1.94E-04 | 165 |
|       | Alfalfa |          |                                              |          |     |
| Liver | hay     | Positive | chronic myeloid leukemia                     | 1.94E-04 | 39  |
|       | Alfalfa |          |                                              |          |     |
| Liver | hay     | Positive | uptake of 2-deoxyglucose                     | 1.94E-04 | 39  |
|       | Alfalfa |          |                                              |          |     |
| Liver | hay     | Positive | cytostasis                                   | 2.00E-04 | 91  |
|       | Alfalfa |          |                                              |          |     |
| Liver | hay     | Positive | cell movement of macrophages                 | 2.00E-04 | 86  |
|       | Alfalfa |          |                                              |          |     |
| Liver | hay     | Positive | Hypoplasia                                   | 2.00E-04 | 155 |
|       | Alfalfa |          |                                              |          |     |
| Liver | hay     | Positive | abnormal morphology of endothelial tissue    | 2.02E-04 | 26  |
|       | Alfalfa |          |                                              |          |     |
| Liver | hay     | Positive | permeability of epithelial tissue            | 2.02E-04 | 26  |
|       | Alfalfa |          |                                              |          |     |
| Liver | hay     | Positive | cell death of fibrosarcoma cell lines        | 2.11E-04 | 29  |
|       | Alfalfa |          |                                              |          |     |
| Liver | hay     | Positive | apoptosis of cortical neurons                | 2.11E-04 | 33  |
| Liver | Alfalfa | Positive | abnormal morphology of artery                | 2.19E-04 | 52  |

|       |         |          |                                         |          |      |
|-------|---------|----------|-----------------------------------------|----------|------|
|       | hay     |          |                                         |          |      |
|       | Alfalfa |          |                                         |          |      |
| Liver | hay     | Positive | cell death of endothelial cells         | 2.19E-04 | 67   |
|       | Alfalfa |          |                                         |          |      |
| Liver | hay     | Positive | morphology of mononuclear leukocytes    | 2.19E-04 | 67   |
|       | Alfalfa |          |                                         |          |      |
| Liver | hay     | Positive | quantity of macrophages                 | 2.19E-04 | 67   |
|       | Alfalfa |          |                                         |          |      |
| Liver | hay     | Positive | synthesis of prostaglandin              | 2.19E-04 | 59   |
|       | Alfalfa |          |                                         |          |      |
| Liver | hay     | Positive | arthritis                               | 2.21E-04 | 276  |
|       | Alfalfa |          |                                         |          |      |
| Liver | hay     | Positive | abnormal morphology of digestive system | 2.25E-04 | 166  |
|       | Alfalfa |          |                                         |          |      |
| Liver | hay     | Positive | atrophy of muscle                       | 2.25E-04 | 51   |
|       | Alfalfa |          |                                         |          |      |
| Liver | hay     | Positive | cell movement of epithelial cells       | 2.25E-04 | 51   |
|       | Alfalfa |          |                                         |          |      |
| Liver | hay     | Positive | hyperkeratosis                          | 2.25E-04 | 35   |
|       | Alfalfa |          |                                         |          |      |
| Liver | hay     | Positive | secretion of molecule                   | 2.25E-04 | 168  |
|       | Alfalfa |          |                                         |          |      |
| Liver | hay     | Negative | cell death                              | 1.06E-20 | 841  |
|       | Alfalfa |          |                                         |          |      |
| Liver | hay     | Negative | necrosis                                | 3.86E-20 | 672  |
|       | Alfalfa |          |                                         |          |      |
| Liver | hay     | Negative | organismal death                        | 4.09E-20 | 632  |
|       | Alfalfa |          |                                         |          |      |
| Liver | hay     | Negative | apoptosis                               | 4.09E-20 | 686  |
|       | Alfalfa |          |                                         |          |      |
| Liver | hay     | Negative | morbidity or mortality                  | 1.39E-19 | 636  |
|       | Alfalfa |          |                                         |          |      |
| Liver | hay     | Negative | malignant solid tumor                   | 5.74E-19 | 2294 |
|       | Alfalfa |          |                                         |          |      |
| Liver | hay     | Negative | cancer                                  | 7.38E-19 | 2318 |
|       | Alfalfa |          |                                         |          |      |
| Liver | hay     | Negative | proliferation of cells                  | 1.18E-17 | 896  |
|       | Alfalfa |          |                                         |          |      |
| Liver | hay     | Negative | morphology of cells                     | 2.80E-15 | 509  |
|       | Alfalfa |          |                                         |          |      |
| Liver | hay     | Negative | neoplasia of epithelial tissue          | 1.75E-14 | 1918 |
|       | Alfalfa |          |                                         |          |      |
| Liver | hay     | Negative | cell death of tumor cell lines          | 1.86E-14 | 411  |
| Liver | Alfalfa | Negative | tumorigenesis of tissue                 | 1.86E-14 | 1946 |

|       |         |          |                                       |          |      |
|-------|---------|----------|---------------------------------------|----------|------|
|       | hay     |          |                                       |          |      |
|       | Alfalfa |          |                                       |          |      |
| Liver | hay     | Negative | epithelial cancer                     | 5.34E-14 | 1898 |
|       | Alfalfa |          |                                       |          |      |
| Liver | hay     | Negative | apoptosis of tumor cell lines         | 4.24E-13 | 333  |
|       | Alfalfa |          |                                       |          |      |
| Liver | hay     | Negative | organization of cytoplasm             | 1.07E-12 | 404  |
|       | Alfalfa |          |                                       |          |      |
| Liver | hay     | Negative | organization of cytoskeleton          | 1.07E-12 | 373  |
|       | Alfalfa |          |                                       |          |      |
| Liver | hay     | Negative | cellular homeostasis                  | 1.34E-12 | 401  |
|       | Alfalfa |          |                                       |          |      |
| Liver | hay     | Negative | digestive organ tumor                 | 1.64E-12 | 1653 |
|       | Alfalfa |          |                                       |          |      |
| Liver | hay     | Negative | digestive system cancer               | 1.64E-12 | 1639 |
|       | Alfalfa |          |                                       |          |      |
| Liver | hay     | Negative | abdominal neoplasm                    | 2.87E-12 | 1889 |
|       | Alfalfa |          |                                       |          |      |
| Liver | hay     | Negative | cell movement                         | 1.79E-11 | 528  |
|       | Alfalfa |          |                                       |          |      |
| Liver | hay     | Negative | quantity of cells                     | 2.50E-11 | 449  |
|       | Alfalfa |          |                                       |          |      |
| Liver | hay     | Negative | cell death of connective tissue cells | 3.36E-11 | 180  |
|       | Alfalfa |          |                                       |          |      |
| Liver | hay     | Negative | abdominal cancer                      | 4.96E-11 | 1860 |
|       | Alfalfa |          |                                       |          |      |
| Liver | hay     | Negative | cell survival                         | 5.11E-11 | 364  |
|       | Alfalfa |          |                                       |          |      |
| Liver | hay     | Negative | quantity of blood cells               | 2.61E-10 | 278  |
|       | Alfalfa |          |                                       |          |      |
| Liver | hay     | Negative | quantity of leukocytes                | 2.68E-10 | 252  |
|       | Alfalfa |          |                                       |          |      |
| Liver | hay     | Negative | development of lymphatic system       | 3.54E-10 | 114  |
|       | Alfalfa |          |                                       |          |      |
| Liver | hay     | Negative | cell viability                        | 3.54E-10 | 339  |
|       | Alfalfa |          |                                       |          |      |
| Liver | hay     | Negative | differentiation of cells              | 4.13E-10 | 546  |
|       | Alfalfa |          |                                       |          |      |
| Liver | hay     | Negative | transport of molecule                 | 8.41E-10 | 406  |
|       | Alfalfa |          |                                       |          |      |
| Liver | hay     | Negative | migration of cells                    | 1.42E-09 | 468  |
|       | Alfalfa |          |                                       |          |      |
| Liver | hay     | Negative | microtubule dynamics                  | 2.04E-09 | 309  |
| Liver | Alfalfa | Negative | expression of RNA                     | 3.32E-09 | 518  |

|       |         |          |                                                 |          |     |
|-------|---------|----------|-------------------------------------------------|----------|-----|
|       | hay     |          |                                                 |          |     |
|       | Alfalfa |          |                                                 |          |     |
| Liver | hay     | Negative | development of leukocytes                       | 3.80E-09 | 169 |
|       | Alfalfa |          |                                                 |          |     |
| Liver | hay     | Negative | Growth Failure                                  | 4.80E-09 | 171 |
|       | Alfalfa |          |                                                 |          |     |
| Liver | hay     | Negative | development of blood cells                      | 4.99E-09 | 184 |
|       | Alfalfa |          |                                                 |          |     |
| Liver | hay     | Negative | abnormal morphology of cells                    | 5.11E-09 | 325 |
|       | Alfalfa |          |                                                 |          |     |
| Liver | hay     | Negative | development of body trunk                       | 7.43E-09 | 291 |
|       | Alfalfa |          |                                                 |          |     |
| Liver | hay     | Negative | quantity of lymphocytes                         | 1.61E-08 | 195 |
|       | Alfalfa |          |                                                 |          |     |
| Liver | hay     | Negative | morphology of cardiovascular system             | 1.61E-08 | 174 |
|       | Alfalfa |          |                                                 |          |     |
| Liver | hay     | Negative | Movement Disorders                              | 1.85E-08 | 276 |
|       | Alfalfa |          |                                                 |          |     |
| Liver | hay     | Negative | transcription                                   | 2.19E-08 | 480 |
|       | Alfalfa |          |                                                 |          |     |
| Liver | hay     | Negative | proliferation of hematopoietic progenitor cells | 2.89E-08 | 79  |
|       | Alfalfa |          |                                                 |          |     |
| Liver | hay     | Negative | quantity of mononuclear leukocytes              | 3.63E-08 | 200 |
|       | Alfalfa |          |                                                 |          |     |
| Liver | hay     | Negative | proliferation of blood cells                    | 3.63E-08 | 225 |
|       | Alfalfa |          |                                                 |          |     |
| Liver | hay     | Negative | disorder of basal ganglia                       | 4.36E-08 | 207 |
|       | Alfalfa |          |                                                 |          |     |
| Liver | hay     | Negative | perinatal death                                 | 4.36E-08 | 166 |
|       | Alfalfa |          |                                                 |          |     |
| Liver | hay     | Negative | quantity of connective tissue                   | 4.36E-08 | 168 |
|       | Alfalfa |          |                                                 |          |     |
| Liver | hay     | Negative | development of vasculature                      | 4.36E-08 | 123 |
|       | Alfalfa |          |                                                 |          |     |
| Liver | hay     | Negative | growth of organism                              | 4.36E-08 | 223 |
|       | Alfalfa |          |                                                 |          |     |
| Liver | hay     | Negative | abnormal morphology of thoracic cavity          | 4.54E-08 | 164 |
|       | Alfalfa |          |                                                 |          |     |
| Liver | hay     | Negative | transcription of RNA                            | 4.79E-08 | 448 |
|       | Alfalfa |          |                                                 |          |     |
| Liver | hay     | Negative | Viral Infection                                 | 5.18E-08 | 395 |
|       | Alfalfa |          |                                                 |          |     |
| Liver | hay     | Negative | cell movement of tumor cell lines               | 5.44E-08 | 226 |
| Liver | Alfalfa | Negative | development of lymphatic system component       | 5.81E-08 | 95  |



|       |         |          |                                              |          |     |
|-------|---------|----------|----------------------------------------------|----------|-----|
|       | hay     |          |                                              |          |     |
|       | Alfalfa |          |                                              |          |     |
| Liver | hay     | Negative | neuronal cell death                          | 6.02E-08 | 186 |
|       | Alfalfa |          |                                              |          |     |
| Liver | hay     | Negative | proliferation of hematopoietic cells         | 6.26E-08 | 81  |
|       | Alfalfa |          |                                              |          |     |
| Liver | hay     | Negative | homeostasis of leukocytes                    | 9.38E-08 | 155 |
|       | Alfalfa |          |                                              |          |     |
| Liver | hay     | Negative | abnormal morphology of cardiovascular system | 9.55E-08 | 158 |
|       | Alfalfa |          |                                              |          |     |
| Liver | hay     | Negative | growth of connective tissue                  | 1.13E-07 | 176 |
|       | Alfalfa |          |                                              |          |     |
| Liver | hay     | Negative | development of lymphocytes                   | 1.35E-07 | 154 |
|       | Alfalfa |          |                                              |          |     |
| Liver | hay     | Negative | Huntington's Disease                         | 1.39E-07 | 159 |
|       | Alfalfa |          |                                              |          |     |
| Liver | hay     | Negative | dyskinesia                                   | 1.43E-07 | 169 |
|       | Alfalfa |          |                                              |          |     |
| Liver | hay     | Negative | proliferation of immune cells                | 1.50E-07 | 210 |
|       | Alfalfa |          |                                              |          |     |
| Liver | hay     | Negative | abnormal morphology of body cavity           | 1.57E-07 | 289 |
|       | Alfalfa |          |                                              |          |     |
| Liver | hay     | Negative | vasculogenesis                               | 1.57E-07 | 197 |
|       | Alfalfa |          |                                              |          |     |
| Liver | hay     | Negative | size of body                                 | 1.90E-07 | 223 |
|       | Alfalfa |          |                                              |          |     |
| Liver | hay     | Negative | development of hematopoietic system          | 1.97E-07 | 78  |
|       | Alfalfa |          |                                              |          |     |
| Liver | hay     | Negative | morphology of body cavity                    | 1.98E-07 | 300 |
|       | Alfalfa |          |                                              |          |     |
| Liver | hay     | Negative | degeneration of cells                        | 2.00E-07 | 102 |
|       | Alfalfa |          |                                              |          |     |
| Liver | hay     | Negative | Lymphocyte homeostasis                       | 2.12E-07 | 151 |
|       | Alfalfa |          |                                              |          |     |
| Liver | hay     | Negative | cell death of blood cells                    | 2.30E-07 | 186 |
|       | Alfalfa |          |                                              |          |     |
| Liver | hay     | Negative | proliferation of connective tissue cells     | 2.70E-07 | 162 |
|       | Alfalfa |          |                                              |          |     |
| Liver | hay     | Negative | cell death of fibroblast cell lines          | 2.70E-07 | 122 |
|       | Alfalfa |          |                                              |          |     |
| Liver | hay     | Negative | degeneration of nervous system               | 3.16E-07 | 87  |
|       | Alfalfa |          |                                              |          |     |
| Liver | hay     | Negative | ubiquitination of protein                    | 3.73E-07 | 98  |
| Liver | Alfalfa | Negative | migration of tumor cell lines                | 3.95E-07 | 188 |

|       |         |          |                                          |          |      |
|-------|---------|----------|------------------------------------------|----------|------|
|       | hay     |          |                                          |          |      |
|       | Alfalfa |          |                                          |          |      |
| Liver | hay     | Negative | neurological signs                       | 3.98E-07 | 175  |
|       | Alfalfa |          |                                          |          |      |
| Liver | hay     | Negative | ubiquitination                           | 4.42E-07 | 99   |
|       | Alfalfa |          |                                          |          |      |
| Liver | hay     | Negative | abnormal morphology of epithelial tissue | 4.65E-07 | 119  |
|       | Alfalfa |          |                                          |          |      |
| Liver | hay     | Negative | Gastrointestinal Tract Cancer and Tumors | 4.76E-07 | 1129 |
|       | Alfalfa |          |                                          |          |      |
| Liver | hay     | Negative | gastrointestinal tract cancer            | 4.96E-07 | 1112 |
|       | Alfalfa |          |                                          |          |      |
| Liver | hay     | Negative | quantity of T lymphocytes                | 4.96E-07 | 147  |
|       | Alfalfa |          |                                          |          |      |
| Liver | hay     | Negative | formation of mononuclear leukocytes      | 5.25E-07 | 46   |
|       | Alfalfa |          |                                          |          |      |
| Liver | hay     | Negative | T cell development                       | 5.49E-07 | 139  |
|       | Alfalfa |          |                                          |          |      |
| Liver | hay     | Negative | neurodegeneration of neurites            | 5.62E-07 | 35   |
|       | Alfalfa |          |                                          |          |      |
| Liver | hay     | Negative | development of cytoplasm                 | 6.30E-07 | 129  |
|       | Alfalfa |          |                                          |          |      |
| Liver | hay     | Negative | apoptosis of fibroblast cell lines       | 7.47E-07 | 96   |
|       | Alfalfa |          |                                          |          |      |
| Liver | hay     | Negative | damage of nervous system                 | 7.93E-07 | 70   |
|       | Alfalfa |          |                                          |          |      |
| Liver | hay     | Negative | formation of leukocytes                  | 8.06E-07 | 53   |
|       | Alfalfa |          |                                          |          |      |
| Liver | hay     | Negative | Neurodegeneration                        | 8.95E-07 | 91   |
|       | Alfalfa |          |                                          |          |      |
| Liver | hay     | Negative | chronic myeloid leukemia                 | 9.43E-07 | 39   |
|       | Alfalfa |          |                                          |          |      |
| Liver | hay     | Negative | cell death of immune cells               | 9.94E-07 | 175  |
|       | Alfalfa |          |                                          |          |      |
| Liver | hay     | Negative | T cell homeostasis                       | 1.05E-06 | 141  |
|       | Alfalfa |          |                                          |          |      |
| Liver | hay     | Negative | cell death of cervical cancer cell lines | 1.05E-06 | 101  |
|       | Alfalfa |          |                                          |          |      |
| Liver | hay     | Negative | formation of lymphocytes                 | 1.05E-06 | 44   |
|       | Alfalfa |          |                                          |          |      |
| Liver | hay     | Negative | cellular degradation                     | 1.07E-06 | 77   |
|       | Alfalfa |          |                                          |          |      |
| Liver | hay     | Negative | transcription of DNA                     | 1.08E-06 | 369  |
| Liver | Alfalfa | Negative | neuromuscular disease                    | 1.08E-06 | 226  |

|       |         |          |                                         |          |      |
|-------|---------|----------|-----------------------------------------|----------|------|
|       | hay     |          |                                         |          |      |
|       | Alfalfa |          |                                         |          |      |
| Liver | hay     | Negative | degeneration of neurons                 | 1.25E-06 | 73   |
|       | Alfalfa |          |                                         |          |      |
| Liver | hay     | Negative | formation of cells                      | 1.34E-06 | 248  |
|       | Alfalfa |          |                                         |          |      |
| Liver | hay     | Negative | morphology of lymph node                | 1.37E-06 | 53   |
|       | Alfalfa |          |                                         |          |      |
| Liver | hay     | Negative | neonatal death                          | 1.41E-06 | 122  |
|       | Alfalfa |          |                                         |          |      |
| Liver | hay     | Negative | growth of embryo                        | 1.45E-06 | 131  |
|       | Alfalfa |          |                                         |          |      |
| Liver | hay     | Negative | function of cardiovascular system       | 1.49E-06 | 105  |
|       | Alfalfa |          |                                         |          |      |
| Liver | hay     | Negative | homing of cells                         | 1.59E-06 | 150  |
|       | Alfalfa |          |                                         |          |      |
| Liver | hay     | Negative | development of digestive system         | 1.85E-06 | 108  |
|       | Alfalfa |          |                                         |          |      |
| Liver | hay     | Negative | angiogenesis                            | 1.89E-06 | 230  |
|       | Alfalfa |          |                                         |          |      |
| Liver | hay     | Negative | colorectal neoplasia                    | 2.17E-06 | 959  |
|       | Alfalfa |          |                                         |          |      |
| Liver | hay     | Negative | abnormal morphology of lymph node       | 2.23E-06 | 50   |
|       | Alfalfa |          |                                         |          |      |
| Liver | hay     | Negative | function of blood cells                 | 2.39E-06 | 156  |
|       | Alfalfa |          |                                         |          |      |
| Liver | hay     | Negative | homing                                  | 2.40E-06 | 153  |
|       | Alfalfa |          |                                         |          |      |
| Liver | hay     | Negative | chemotaxis of cells                     | 2.41E-06 | 142  |
|       | Alfalfa |          |                                         |          |      |
| Liver | hay     | Negative | breast or colorectal cancer             | 3.04E-06 | 1085 |
|       | Alfalfa |          |                                         |          |      |
| Liver | hay     | Negative | intestinal tumor                        | 3.20E-06 | 960  |
|       | Alfalfa |          |                                         |          |      |
| Liver | hay     | Negative | differentiation of leukocytes           | 3.75E-06 | 175  |
|       | Alfalfa |          |                                         |          |      |
| Liver | hay     | Negative | neurodegeneration of axons              | 3.75E-06 | 32   |
|       | Alfalfa |          |                                         |          |      |
| Liver | hay     | Negative | proliferation of mononuclear leukocytes | 3.96E-06 | 190  |
|       | Alfalfa |          |                                         |          |      |
| Liver | hay     | Negative | differentiation of blood cells          | 3.96E-06 | 214  |
|       | Alfalfa |          |                                         |          |      |
| Liver | hay     | Negative | gastrointestinal carcinoma              | 4.04E-06 | 994  |
| Liver | Alfalfa | Negative | cell cycle progression                  | 4.37E-06 | 259  |

|       |         |          |                                            |          |     |
|-------|---------|----------|--------------------------------------------|----------|-----|
|       | hay     |          |                                            |          |     |
|       | Alfalfa |          |                                            |          |     |
| Liver | hay     | Negative | chemotaxis                                 | 4.37E-06 | 145 |
|       | Alfalfa |          |                                            |          |     |
| Liver | hay     | Negative | cell death of epithelial cell lines        | 4.41E-06 | 82  |
|       | Alfalfa |          |                                            |          |     |
| Liver | hay     | Negative | size of embryo                             | 4.53E-06 | 100 |
|       | Alfalfa |          |                                            |          |     |
| Liver | hay     | Negative | Bleeding                                   | 5.42E-06 | 116 |
|       | Alfalfa |          |                                            |          |     |
| Liver | hay     | Negative | autosomal dominant disease                 | 5.53E-06 | 166 |
|       | Alfalfa |          |                                            |          |     |
| Liver | hay     | Negative | mitosis                                    | 5.62E-06 | 133 |
|       | Alfalfa |          |                                            |          |     |
| Liver | hay     | Negative | morphology of lymphatic system component   | 5.70E-06 | 114 |
|       | Alfalfa |          |                                            |          |     |
| Liver | hay     | Negative | colorectal cancer                          | 6.13E-06 | 942 |
|       | Alfalfa |          |                                            |          |     |
| Liver | hay     | Negative | cell spreading                             | 6.36E-06 | 80  |
|       | Alfalfa |          |                                            |          |     |
| Liver | hay     | Negative | apoptosis of epithelial cell lines         | 6.47E-06 | 67  |
|       | Alfalfa |          |                                            |          |     |
| Liver | hay     | Negative | quantity of hematopoietic cells            | 6.71E-06 | 120 |
|       | Alfalfa |          |                                            |          |     |
| Liver | hay     | Negative | intestinal cancer                          | 6.75E-06 | 943 |
|       | Alfalfa |          |                                            |          |     |
| Liver | hay     | Negative | formation of cytoskeleton                  | 6.81E-06 | 104 |
|       | Alfalfa |          |                                            |          |     |
| Liver | hay     | Negative | proliferation of lymphocytes               | 7.04E-06 | 186 |
|       | Alfalfa |          |                                            |          |     |
| Liver | hay     | Negative | quantity of metal                          | 7.04E-06 | 133 |
|       | Alfalfa |          |                                            |          |     |
| Liver | hay     | Negative | cell movement of leukocytes                | 7.24E-06 | 195 |
|       | Alfalfa |          |                                            |          |     |
| Liver | hay     | Negative | Thrombosis                                 | 7.86E-06 | 53  |
|       | Alfalfa |          |                                            |          |     |
| Liver | hay     | Negative | proliferation of fibroblasts               | 8.76E-06 | 98  |
|       | Alfalfa |          |                                            |          |     |
| Liver | hay     | Negative | quantity of lymphoid organ                 | 8.99E-06 | 87  |
|       | Alfalfa |          |                                            |          |     |
| Liver | hay     | Negative | formation of cellular protrusions          | 8.99E-06 | 225 |
|       | Alfalfa |          |                                            |          |     |
| Liver | hay     | Negative | abnormal morphology of lymphoid organ      | 9.07E-06 | 104 |
| Liver | Alfalfa | Negative | quantity of hematopoietic progenitor cells | 9.30E-06 | 119 |

|       |         |          |                                         |          |      |
|-------|---------|----------|-----------------------------------------|----------|------|
|       | hay     |          |                                         |          |      |
|       | Alfalfa |          |                                         |          |      |
| Liver | hay     | Negative | morphology of bone                      | 9.40E-06 | 121  |
|       | Alfalfa |          |                                         |          |      |
| Liver | hay     | Negative | cell viability of tumor cell lines      | 9.51E-06 | 197  |
|       | Alfalfa |          |                                         |          |      |
| Liver | hay     | Negative | cellular infiltration by leukocytes     | 1.03E-05 | 106  |
|       | Alfalfa |          |                                         |          |      |
| Liver | hay     | Negative | colon cancer                            | 1.15E-05 | 818  |
|       | Alfalfa |          |                                         |          |      |
| Liver | hay     | Negative | formation of T lymphocytes              | 1.15E-05 | 39   |
|       | Alfalfa |          |                                         |          |      |
| Liver | hay     | Negative | quantity of antigen presenting cells    | 1.19E-05 | 79   |
|       | Alfalfa |          |                                         |          |      |
| Liver | hay     | Negative | growth of epithelial tissue             | 1.19E-05 | 174  |
|       | Alfalfa |          |                                         |          |      |
| Liver | hay     | Negative | Hypertrophy                             | 1.24E-05 | 126  |
|       | Alfalfa |          |                                         |          |      |
| Liver | hay     | Negative | formation of lymphoid organ             | 1.26E-05 | 76   |
|       | Alfalfa |          |                                         |          |      |
| Liver | hay     | Negative | colon tumor                             | 1.28E-05 | 822  |
|       | Alfalfa |          |                                         |          |      |
| Liver | hay     | Negative | development of epithelial tissue        | 1.32E-05 | 136  |
|       | Alfalfa |          |                                         |          |      |
| Liver | hay     | Negative | cytopenia                               | 1.34E-05 | 84   |
|       | Alfalfa |          |                                         |          |      |
| Liver | hay     | Negative | abnormal morphology of embryonic tissue | 1.50E-05 | 143  |
|       | Alfalfa |          |                                         |          |      |
| Liver | hay     | Negative | phosphorylation of protein              | 1.52E-05 | 186  |
|       | Alfalfa |          |                                         |          |      |
| Liver | hay     | Negative | growth of lymphatic system component    | 1.53E-05 | 58   |
|       | Alfalfa |          |                                         |          |      |
| Liver | hay     | Negative | concentration of lipid                  | 1.55E-05 | 203  |
|       | Alfalfa |          |                                         |          |      |
| Liver | hay     | Negative | cognition                               | 1.55E-05 | 121  |
|       | Alfalfa |          |                                         |          |      |
| Liver | hay     | Negative | morphology of axial skeleton            | 1.64E-05 | 60   |
|       | Alfalfa |          |                                         |          |      |
| Liver | hay     | Negative | adenocarcinoma                          | 1.68E-05 | 1387 |
|       | Alfalfa |          |                                         |          |      |
| Liver | hay     | Negative | morphology of lymphoid organ            | 1.79E-05 | 106  |
|       | Alfalfa |          |                                         |          |      |
| Liver | hay     | Negative | cell movement of blood cells            | 1.79E-05 | 217  |
| Liver | Alfalfa | Negative | function of leukocytes                  | 1.90E-05 | 140  |

|       |         |          |                                           |          |     |
|-------|---------|----------|-------------------------------------------|----------|-----|
|       | hay     |          |                                           |          |     |
|       | Alfalfa |          |                                           |          |     |
| Liver | hay     | Negative | formation of lymphatic system component   | 1.90E-05 | 82  |
|       | Alfalfa |          |                                           |          |     |
| Liver | hay     | Negative | formation of blood cells                  | 1.95E-05 | 59  |
|       | Alfalfa |          |                                           |          |     |
| Liver | hay     | Negative | cellular infiltration of cells            | 1.96E-05 | 107 |
|       | Alfalfa |          |                                           |          |     |
| Liver | hay     | Negative | maturation of cells                       | 1.97E-05 | 121 |
|       | Alfalfa |          |                                           |          |     |
| Liver | hay     | Negative | morphology of connective tissue           | 1.97E-05 | 122 |
|       | Alfalfa |          |                                           |          |     |
| Liver | hay     | Negative | differentiation of connective tissue      | 1.97E-05 | 184 |
|       | Alfalfa |          |                                           |          |     |
| Liver | hay     | Negative | quantity of thymocytes                    | 2.01E-05 | 67  |
|       | Alfalfa |          |                                           |          |     |
| Liver | hay     | Negative | tumorigenesis of intestine                | 2.06E-05 | 819 |
|       | Alfalfa |          |                                           |          |     |
| Liver | hay     | Negative | migration of blood cells                  | 2.12E-05 | 216 |
|       | Alfalfa |          |                                           |          |     |
| Liver | hay     | Negative | damage of nervous tissue                  | 2.12E-05 | 32  |
|       | Alfalfa |          |                                           |          |     |
| Liver | hay     | Negative | infection of cells                        | 2.21E-05 | 199 |
|       | Alfalfa |          |                                           |          |     |
| Liver | hay     | Negative | quantity of lymphatic system component    | 2.38E-05 | 102 |
|       | Alfalfa |          |                                           |          |     |
| Liver | hay     | Negative | Edema                                     | 2.48E-05 | 94  |
|       | Alfalfa |          |                                           |          |     |
| Liver | hay     | Negative | proliferation of myeloid cells            | 2.48E-05 | 39  |
|       | Alfalfa |          |                                           |          |     |
| Liver | hay     | Negative | cell movement of myeloid cells            | 2.48E-05 | 140 |
|       | Alfalfa |          |                                           |          |     |
| Liver | hay     | Negative | abnormal morphology of respiratory system | 2.58E-05 | 85  |
|       | Alfalfa |          |                                           |          |     |
| Liver | hay     | Negative | gastrointestinal adenocarcinoma           | 2.62E-05 | 931 |
|       | Alfalfa |          |                                           |          |     |
| Liver | hay     | Negative | phosphorylation of L-amino acid           | 2.62E-05 | 64  |
|       | Alfalfa |          |                                           |          |     |
| Liver | hay     | Negative | morphology of respiratory system          | 2.64E-05 | 86  |
|       | Alfalfa |          |                                           |          |     |
| Liver | hay     | Negative | leukocyte migration                       | 2.68E-05 | 215 |
|       | Alfalfa |          |                                           |          |     |
| Liver | hay     | Negative | autophagy                                 | 2.77E-05 | 101 |
| Liver | Alfalfa | Negative | quantity of metal ion                     | 2.88E-05 | 117 |

|       |         |          |                                               |          |      |
|-------|---------|----------|-----------------------------------------------|----------|------|
|       | hay     |          |                                               |          |      |
|       | Alfalfa |          |                                               |          |      |
| Liver | hay     | Negative | damage of neurons                             | 2.98E-05 | 31   |
|       | Alfalfa |          |                                               |          |      |
| Liver | hay     | Negative | development of connective tissue              | 2.98E-05 | 100  |
|       | Alfalfa |          |                                               |          |      |
| Liver | hay     | Negative | learning                                      | 3.05E-05 | 111  |
|       | Alfalfa |          |                                               |          |      |
| Liver | hay     | Negative | development of hematopoietic progenitor cells | 3.06E-05 | 57   |
|       | Alfalfa |          |                                               |          |      |
| Liver | hay     | Negative | activation of cells                           | 3.17E-05 | 238  |
|       | Alfalfa |          |                                               |          |      |
| Liver | hay     | Negative | differentiation of connective tissue cells    | 3.17E-05 | 163  |
|       | Alfalfa |          |                                               |          |      |
| Liver | hay     | Negative | leukopenia                                    | 3.22E-05 | 42   |
|       | Alfalfa |          |                                               |          |      |
| Liver | hay     | Negative | morphology of vertebral column                | 3.28E-05 | 45   |
|       | Alfalfa |          |                                               |          |      |
| Liver | hay     | Negative | peripheral vascular disease                   | 3.28E-05 | 102  |
|       | Alfalfa |          |                                               |          |      |
| Liver | hay     | Negative | proliferation of tumor cell lines             | 3.28E-05 | 360  |
|       | Alfalfa |          |                                               |          |      |
| Liver | hay     | Negative | abdominal adenocarcinoma                      | 3.28E-05 | 1263 |
|       | Alfalfa |          |                                               |          |      |
| Liver | hay     | Negative | seizure disorder                              | 3.28E-05 | 123  |
|       | Alfalfa |          |                                               |          |      |
| Liver | hay     | Negative | development of hematopoietic cells            | 3.28E-05 | 58   |
|       | Alfalfa |          |                                               |          |      |
| Liver | hay     | Negative | cell movement of muscle cells                 | 3.28E-05 | 54   |
|       | Alfalfa |          |                                               |          |      |
| Liver | hay     | Negative | metastatic colorectal cancer                  | 3.42E-05 | 57   |
|       | Alfalfa |          |                                               |          |      |
| Liver | hay     | Negative | formation of lung                             | 3.47E-05 | 83   |
|       | Alfalfa |          |                                               |          |      |
| Liver | hay     | Negative | infection by Retroviridae                     | 3.53E-05 | 180  |
|       | Alfalfa |          |                                               |          |      |
| Liver | hay     | Negative | development of lymphatic system cells         | 3.64E-05 | 36   |
|       | Alfalfa |          |                                               |          |      |
| Liver | hay     | Negative | fibrogenesis                                  | 3.76E-05 | 109  |
|       | Alfalfa |          |                                               |          |      |
| Liver | hay     | Negative | abnormal morphology of axial skeleton         | 3.93E-05 | 57   |
|       | Alfalfa |          |                                               |          |      |
| Liver | hay     | Negative | damage of central nervous system              | 4.08E-05 | 56   |
| Liver | Alfalfa | Negative | development of cardiovascular tissue          | 4.08E-05 | 99   |

|       |         |          |                                                  |          |     |
|-------|---------|----------|--------------------------------------------------|----------|-----|
|       | hay     |          |                                                  |          |     |
|       | Alfalfa |          |                                                  |          |     |
| Liver | hay     | Negative | colorectal carcinoma                             | 4.08E-05 | 812 |
|       | Alfalfa |          |                                                  |          |     |
| Liver | hay     | Negative | metabolism of protein                            | 4.18E-05 | 236 |
|       | Alfalfa |          |                                                  |          |     |
| Liver | hay     | Negative | apoptosis of cervical cancer cell lines          | 4.42E-05 | 78  |
|       | Alfalfa |          |                                                  |          |     |
| Liver | hay     | Negative | protein kinase cascade                           | 4.48E-05 | 111 |
|       | Alfalfa |          |                                                  |          |     |
| Liver | hay     | Negative | endothelial cell development                     | 4.64E-05 | 95  |
|       | Alfalfa |          |                                                  |          |     |
| Liver | hay     | Negative | abnormal morphology of membrane tissue           | 4.80E-05 | 51  |
|       | Alfalfa |          |                                                  |          |     |
| Liver | hay     | Negative | connective or soft tissue tumor                  | 4.90E-05 | 176 |
|       | Alfalfa |          |                                                  |          |     |
| Liver | hay     | Negative | formation of thymus gland                        | 5.04E-05 | 49  |
|       | Alfalfa |          |                                                  |          |     |
| Liver | hay     | Negative | infection by RNA virus                           | 5.11E-05 | 212 |
|       | Alfalfa |          |                                                  |          |     |
| Liver | hay     | Negative | hypertrophy of heart                             | 5.21E-05 | 91  |
|       | Alfalfa |          |                                                  |          |     |
| Liver | hay     | Negative | Inflammatory Bowel Disease                       | 5.27E-05 | 72  |
|       | Alfalfa |          |                                                  |          |     |
| Liver | hay     | Negative | respiratory system development                   | 5.27E-05 | 92  |
|       | Alfalfa |          |                                                  |          |     |
| Liver | hay     | Negative | abnormal morphology of abdomen                   | 5.37E-05 | 214 |
|       | Alfalfa |          |                                                  |          |     |
| Liver | hay     | Negative | apoptosis of connective tissue cells             | 5.37E-05 | 81  |
|       | Alfalfa |          |                                                  |          |     |
| Liver | hay     | Negative | cell surface receptor linked signal transduction | 5.37E-05 | 81  |
|       | Alfalfa |          |                                                  |          |     |
| Liver | hay     | Negative | quantity of lymphatic system cells               | 5.56E-05 | 76  |
|       | Alfalfa |          |                                                  |          |     |
| Liver | hay     | Negative | apoptosis of pheochromocytoma cell lines         | 5.69E-05 | 31  |
|       | Alfalfa |          |                                                  |          |     |
| Liver | hay     | Negative | morphology of skeleton                           | 5.77E-05 | 77  |
|       | Alfalfa |          |                                                  |          |     |
| Liver | hay     | Negative | abnormal morphology of body wall                 | 5.86E-05 | 34  |
|       | Alfalfa |          |                                                  |          |     |
| Liver | hay     | Negative | necrosis of epithelial tissue                    | 6.01E-05 | 149 |
|       | Alfalfa |          |                                                  |          |     |
| Liver | hay     | Negative | development of phagocytes                        | 6.33E-05 | 28  |
| Liver | Alfalfa | Negative | secretory pathway                                | 6.66E-05 | 57  |



|       |         |          |                                           |          |     |
|-------|---------|----------|-------------------------------------------|----------|-----|
|       | hay     |          |                                           |          |     |
|       | Alfalfa |          |                                           |          |     |
| Liver | hay     | Negative | cellular infiltration                     | 6.68E-05 | 114 |
|       | Alfalfa |          |                                           |          |     |
| Liver | hay     | Negative | cell death of pheochromocytoma cell lines | 7.07E-05 | 38  |
|       | Alfalfa |          |                                           |          |     |
| Liver | hay     | Negative | development of myeloid cells              | 7.13E-05 | 31  |
|       | Alfalfa |          |                                           |          |     |
| Liver | hay     | Negative | metastatic gastrointestinal tract cancer  | 7.13E-05 | 63  |
|       | Alfalfa |          |                                           |          |     |
| Liver | hay     | Negative | cell death of T lymphocytes               | 7.35E-05 | 85  |
|       | Alfalfa |          |                                           |          |     |
| Liver | hay     | Negative | development of endothelial tissue         | 7.38E-05 | 97  |
|       | Alfalfa |          |                                           |          |     |
| Liver | hay     | Negative | hemorrhagic disease                       | 7.40E-05 | 70  |
|       | Alfalfa |          |                                           |          |     |
| Liver | hay     | Negative | proliferation of T lymphocytes            | 7.46E-05 | 152 |
|       | Alfalfa |          |                                           |          |     |
| Liver | hay     | Negative | long-term potentiation                    | 7.46E-05 | 68  |
|       | Alfalfa |          |                                           |          |     |
| Liver | hay     | Negative | cell death of fibroblasts                 | 7.50E-05 | 73  |
|       | Alfalfa |          |                                           |          |     |
| Liver | hay     | Negative | apoptosis of blood cells                  | 7.77E-05 | 127 |
|       | Alfalfa |          |                                           |          |     |
| Liver | hay     | Negative | formation of skin                         | 7.99E-05 | 97  |
|       | Alfalfa |          |                                           |          |     |
| Liver | hay     | Negative | Hypoplasia                                | 8.22E-05 | 129 |
|       | Alfalfa |          |                                           |          |     |
| Liver | hay     | Negative | quantity of B lymphocytes                 | 8.23E-05 | 92  |
|       | Alfalfa |          |                                           |          |     |
| Liver | hay     | Negative | cell death of mononuclear leukocytes      | 8.32E-05 | 104 |
|       | Alfalfa |          |                                           |          |     |
| Liver | hay     | Negative | memory                                    | 8.51E-05 | 71  |
|       | Alfalfa |          |                                           |          |     |
| Liver | hay     | Negative | survival of organism                      | 8.51E-05 | 174 |
|       | Alfalfa |          |                                           |          |     |
| Liver | hay     | Negative | generation of lymphocytes                 | 8.51E-05 | 43  |
|       | Alfalfa |          |                                           |          |     |
| Liver | hay     | Negative | morphology of vertebrae                   | 8.51E-05 | 42  |
|       | Alfalfa |          |                                           |          |     |
| Liver | hay     | Negative | cell death of hepatoma cell lines         | 8.51E-05 | 50  |
|       | Alfalfa |          |                                           |          |     |
| Liver | hay     | Negative | formation of thymocytes                   | 8.58E-05 | 34  |
| Liver | Alfalfa | Negative | damage of brain                           | 8.75E-05 | 53  |

|       |         |          |                                              |          |     |
|-------|---------|----------|----------------------------------------------|----------|-----|
|       | hay     |          |                                              |          |     |
|       | Alfalfa |          |                                              |          |     |
| Liver | hay     | Negative | cell death of epithelial cells               | 8.80E-05 | 127 |
|       | Alfalfa |          |                                              |          |     |
| Liver | hay     | Negative | abnormal morphology of bone                  | 8.87E-05 | 113 |
|       | Alfalfa |          |                                              |          |     |
| Liver | hay     | Negative | synthesis of reactive oxygen species         | 9.09E-05 | 123 |
|       | Alfalfa |          |                                              |          |     |
| Liver | hay     | Negative | colorectal adenocarcinoma                    | 9.09E-05 | 786 |
|       | Alfalfa |          |                                              |          |     |
| Liver | hay     | Negative | quantity of connective tissue cells          | 9.19E-05 | 66  |
|       | Alfalfa |          |                                              |          |     |
| Liver | hay     | Negative | proliferation of neuronal cells              | 9.19E-05 | 145 |
|       | Alfalfa |          |                                              |          |     |
| Liver | hay     | Negative | differentiation of lymphocytes               | 9.37E-05 | 127 |
|       | Alfalfa |          |                                              |          |     |
| Liver | hay     | Negative | cell death of lymphocytes                    | 9.43E-05 | 101 |
|       | Alfalfa |          |                                              |          |     |
| Liver | hay     | Negative | development of gastrointestinal tract        | 9.65E-05 | 72  |
|       | Alfalfa |          |                                              |          |     |
| Liver | hay     | Negative | seizures                                     | 1.04E-04 | 104 |
|       | Alfalfa |          |                                              |          |     |
| Liver | hay     | Negative | quantity of Ca <sup>2+</sup>                 | 1.04E-04 | 106 |
|       | Alfalfa |          |                                              |          |     |
| Liver | hay     | Negative | abnormal morphology of skeleton              | 1.04E-04 | 74  |
|       | Alfalfa |          |                                              |          |     |
| Liver | hay     | Negative | metabolism of reactive oxygen species        | 1.18E-04 | 127 |
|       | Alfalfa |          |                                              |          |     |
| Liver | hay     | Negative | morphology of mouth                          | 1.19E-04 | 41  |
|       | Alfalfa |          |                                              |          |     |
| Liver | hay     | Negative | synthesis of nitric oxide                    | 1.21E-04 | 75  |
|       | Alfalfa |          |                                              |          |     |
| Liver | hay     | Negative | invasion of cells                            | 1.21E-04 | 210 |
|       | Alfalfa |          |                                              |          |     |
| Liver | hay     | Negative | dysgenesis                                   | 1.21E-04 | 136 |
|       | Alfalfa |          |                                              |          |     |
| Liver | hay     | Negative | malignant connective or soft tissue neoplasm | 1.21E-04 | 112 |
|       | Alfalfa |          | metastatic malignant neoplasm of digestive   |          |     |
| Liver | hay     | Negative | system                                       | 1.23E-04 | 65  |
|       | Alfalfa |          |                                              |          |     |
| Liver | hay     | Negative | HIV infection                                | 1.23E-04 | 175 |
|       | Alfalfa |          |                                              |          |     |
| Liver | hay     | Negative | phosphorylation of L-tyrosine                | 1.23E-04 | 51  |
| Liver | Alfalfa | Negative | biosynthesis of nucleoside triphosphate      | 1.25E-04 | 34  |

|       |         |          |                                              |          |     |
|-------|---------|----------|----------------------------------------------|----------|-----|
|       | hay     |          |                                              |          |     |
|       | Alfalfa |          |                                              |          |     |
| Liver | hay     | Negative | growth of lymphoid organ                     | 1.28E-04 | 50  |
|       | Alfalfa |          |                                              |          |     |
| Liver | hay     | Negative | morphology of vessel                         | 1.29E-04 | 82  |
|       | Alfalfa |          |                                              |          |     |
| Liver | hay     | Negative | apoptosis of hepatoma cell lines             | 1.29E-04 | 45  |
|       | Alfalfa |          |                                              |          |     |
| Liver | hay     | Negative | morphology of digestive system               | 1.31E-04 | 143 |
|       | Alfalfa |          |                                              |          |     |
| Liver | hay     | Negative | cell movement of phagocytes                  | 1.32E-04 | 138 |
|       | Alfalfa |          |                                              |          |     |
| Liver | hay     | Negative | accumulation of lipid                        | 1.35E-04 | 80  |
|       | Alfalfa |          |                                              |          |     |
| Liver | hay     | Negative | metabolism of nucleoside triphosphate        | 1.35E-04 | 42  |
|       | Alfalfa |          |                                              |          |     |
| Liver | hay     | Negative | hypertrophy of tissue                        | 1.35E-04 | 70  |
|       | Alfalfa |          |                                              |          |     |
| Liver | hay     | Negative | abnormal morphology of vertebrae             | 1.35E-04 | 41  |
|       | Alfalfa |          |                                              |          |     |
| Liver | hay     | Negative | congenital anomaly of musculoskeletal system | 1.35E-04 | 180 |
|       | Alfalfa |          |                                              |          |     |
| Liver | hay     | Negative | oral cancer                                  | 1.36E-04 | 63  |
|       | Alfalfa |          |                                              |          |     |
| Liver | hay     | Negative | cell viability of lymphocytes                | 1.38E-04 | 54  |
|       | Alfalfa |          |                                              |          |     |
| Liver | hay     | Negative | formation of filaments                       | 1.40E-04 | 103 |
|       | Alfalfa |          |                                              |          |     |
| Liver | hay     | Negative | development of antigen presenting cells      | 1.43E-04 | 24  |
|       | Alfalfa |          |                                              |          |     |
| Liver | hay     | Negative | midline defect                               | 1.44E-04 | 72  |
|       | Alfalfa |          |                                              |          |     |
| Liver | hay     | Negative | cardiogenesis                                | 1.51E-04 | 120 |
|       | Alfalfa |          |                                              |          |     |
| Liver | hay     | Negative | morphology of blood cells                    | 1.51E-04 | 107 |
|       | Alfalfa |          |                                              |          |     |
| Liver | hay     | Negative | skin abnormality                             | 1.52E-04 | 63  |
|       | Alfalfa |          |                                              |          |     |
| Liver | hay     | Negative | proliferation of embryonic cells             | 1.53E-04 | 68  |
|       | Alfalfa |          |                                              |          |     |
| Liver | hay     | Negative | migration of muscle cells                    | 1.54E-04 | 48  |
|       | Alfalfa |          |                                              |          |     |
| Liver | hay     | Negative | abnormal morphology of vertebral column      | 1.55E-04 | 42  |
| Liver | Alfalfa | Negative | quantity of epithelial tissue                | 1.57E-04 | 51  |

|       |         |          |                                           |          |     |
|-------|---------|----------|-------------------------------------------|----------|-----|
|       | hay     |          |                                           |          |     |
|       | Alfalfa |          |                                           |          |     |
| Liver | hay     | Negative | development of bone marrow                | 1.58E-04 | 38  |
|       | Alfalfa |          |                                           |          |     |
| Liver | hay     | Negative | growth of muscle tissue                   | 1.62E-04 | 97  |
|       | Alfalfa |          |                                           |          |     |
| Liver | hay     | Negative | ovarian cancer                            | 1.62E-04 | 174 |
|       | Alfalfa |          |                                           |          |     |
| Liver | hay     | Negative | binding of DNA                            | 1.62E-04 | 131 |
|       | Alfalfa |          |                                           |          |     |
| Liver | hay     | Negative | apoptosis of breast cancer cell lines     | 1.64E-04 | 77  |
|       | Alfalfa |          |                                           |          |     |
| Liver | hay     | Negative | chronic leukemia                          | 1.64E-04 | 117 |
|       | Alfalfa |          |                                           |          |     |
| Liver | hay     | Negative | hyperplasia of tissue                     | 1.66E-04 | 55  |
|       | Alfalfa |          |                                           |          |     |
| Liver | hay     | Negative | generation of cells                       | 1.68E-04 | 71  |
|       | Alfalfa |          |                                           |          |     |
| Liver | hay     | Negative | abnormal morphology of digestive system   | 1.86E-04 | 136 |
|       | Alfalfa |          |                                           |          |     |
| Liver | hay     | Negative | cell viability of connective tissue cells | 1.86E-04 | 40  |
|       | Alfalfa |          |                                           |          |     |
| Liver | hay     | Negative | recruitment of antigen presenting cells   | 1.86E-04 | 37  |
|       | Alfalfa |          |                                           |          |     |
| Liver | hay     | Negative | chronic myeloproliferative disorder       | 1.89E-04 | 46  |
|       | Alfalfa |          |                                           |          |     |
| Liver | hay     | Negative | oral cavity carcinoma                     | 1.89E-04 | 55  |
|       | Alfalfa |          |                                           |          |     |
| Liver | hay     | Negative | cell movement of fibroblasts              | 1.94E-04 | 52  |
|       | Alfalfa |          |                                           |          |     |
| Liver | hay     | Negative | shape change of tumor cell lines          | 1.94E-04 | 45  |
|       | Alfalfa |          |                                           |          |     |
| Liver | hay     | Negative | hypertrophy of cells                      | 1.99E-04 | 77  |
|       | Alfalfa |          |                                           |          |     |
| Liver | hay     | Negative | potentiation of synapse                   | 1.99E-04 | 44  |
|       | Alfalfa |          |                                           |          |     |
| Liver | hay     | Negative | differentiation of mononuclear leukocytes | 1.99E-04 | 135 |
|       | Alfalfa |          |                                           |          |     |
| Liver | hay     | Negative | synthesis of lipid                        | 2.01E-04 | 174 |
|       | Alfalfa |          |                                           |          |     |
| Liver | hay     | Negative | morphology of heart                       | 2.04E-04 | 104 |
|       | Alfalfa |          |                                           |          |     |
| Liver | hay     | Negative | proliferation of muscle cells             | 2.04E-04 | 96  |
| Liver | Alfalfa | Negative | metabolism of carbohydrate                | 2.11E-04 | 153 |

|       |         |          |                                            |          |      |
|-------|---------|----------|--------------------------------------------|----------|------|
|       | hay     |          |                                            |          |      |
|       | Alfalfa |          |                                            |          |      |
| Liver | hay     | Negative | proliferation of smooth muscle cells       | 2.13E-04 | 76   |
|       | Alfalfa |          |                                            |          |      |
| Liver | hay     | Negative | relapsed leukemia                          | 2.13E-04 | 22   |
|       | Alfalfa |          |                                            |          |      |
| Liver | hay     | Negative | small GTPase mediated signal transduction  | 2.18E-04 | 52   |
|       | Alfalfa |          |                                            |          |      |
| Liver | hay     | Negative | proliferation of lymphatic system cells    | 2.27E-04 | 56   |
|       | Alfalfa |          |                                            |          |      |
| Liver | hay     | Negative | morphology of nervous system               | 2.29E-04 | 189  |
|       | Alfalfa |          |                                            |          |      |
| Liver | hay     | Negative | cell death of breast cancer cell lines     | 2.30E-04 | 87   |
|       | Alfalfa |          |                                            |          |      |
| Liver | hay     | Negative | quantity of phagocytes                     | 2.33E-04 | 108  |
|       | Alfalfa |          |                                            |          |      |
| Liver | hay     | Negative | cell movement of connective tissue cells   | 2.37E-04 | 61   |
|       | Alfalfa |          |                                            |          |      |
| Liver | hay     | Negative | activation of DNA endogenous promoter      | 2.46E-04 | 281  |
|       | Alfalfa |          |                                            |          |      |
| Liver | hay     | Negative | recruitment of macrophages                 | 2.47E-04 | 33   |
|       | Alfalfa |          |                                            |          |      |
| Liver | hay     | Negative | Ovarian Cancer and Tumors                  | 2.51E-04 | 183  |
|       | Alfalfa |          |                                            |          |      |
| Liver | hay     | Negative | serous neoplasm                            | 2.51E-04 | 150  |
|       | Alfalfa |          |                                            |          |      |
| Liver | hay     | Negative | mesoderm development                       | 2.51E-04 | 34   |
|       | Alfalfa |          |                                            |          |      |
| Liver | hay     | Negative | abdominal carcinoma                        | 2.57E-04 | 1268 |
|       | Alfalfa |          |                                            |          |      |
| Liver | hay     | Negative | quantity of myeloid cells                  | 2.57E-04 | 92   |
|       | Alfalfa |          |                                            |          |      |
| Liver | hay     | Negative | migration of connective tissue cells       | 2.59E-04 | 51   |
|       | Alfalfa |          |                                            |          |      |
| Liver | hay     | Negative | tumorigenesis of gonad                     | 2.59E-04 | 194  |
|       | Alfalfa |          |                                            |          |      |
| Liver | hay     | Negative | abnormal morphology of enlarged lymph node | 2.63E-04 | 30   |
|       | Alfalfa |          |                                            |          |      |
| Liver | hay     | Negative | cell viability of mononuclear leukocytes   | 2.68E-04 | 55   |
|       | Alfalfa |          |                                            |          |      |
| Liver | hay     | Negative | cell transformation                        | 2.69E-04 | 116  |
|       | Alfalfa |          |                                            |          |      |
| Liver | hay     | Negative | oral squamous cell carcinoma               | 2.69E-04 | 50   |
| Liver | Alfalfa | Negative | quantity of reactive oxygen species        | 2.69E-04 | 50   |

|       |         |          |                                              |          |     |
|-------|---------|----------|----------------------------------------------|----------|-----|
|       | hay     |          |                                              |          |     |
|       | Alfalfa |          |                                              |          |     |
| Liver | hay     | Negative | expression of protein                        | 2.71E-04 | 88  |
|       | Alfalfa |          |                                              |          |     |
| Liver | hay     | Negative | growth of yeast                              | 2.72E-04 | 31  |
|       | Alfalfa |          |                                              |          |     |
| Liver | hay     | Negative | cell movement of macrophages                 | 2.72E-04 | 71  |
|       | Alfalfa |          |                                              |          |     |
| Liver | hay     | Negative | transformation of fibroblast cell lines      | 2.86E-04 | 69  |
|       | Alfalfa |          |                                              |          |     |
| Liver | hay     | Negative | growth of embryonic tissue                   | 2.88E-04 | 73  |
|       | Alfalfa |          |                                              |          |     |
| Liver | hay     | Negative | attachment of cells                          | 2.89E-04 | 40  |
|       | Alfalfa |          |                                              |          |     |
| Liver | hay     | Negative | apoptosis of liver cells                     | 2.90E-04 | 45  |
|       | Alfalfa |          |                                              |          |     |
| Liver | hay     | Negative | sarcoma                                      | 2.91E-04 | 105 |
|       | Alfalfa |          |                                              |          |     |
| Liver | hay     | Negative | generation of T lymphocytes                  | 2.96E-04 | 35  |
|       | Alfalfa |          |                                              |          |     |
| Liver | hay     | Negative | hyperesthesia                                | 2.96E-04 | 35  |
|       | Alfalfa |          |                                              |          |     |
| Liver | hay     | Negative | behavior                                     | 2.96E-04 | 233 |
|       | Alfalfa |          |                                              |          |     |
| Liver | hay     | Negative | apoptosis of B-lymphocyte derived cell lines | 2.96E-04 | 37  |
|       | Alfalfa |          |                                              |          |     |
| Liver | hay     | Negative | proliferation of bone marrow cells           | 2.96E-04 | 36  |
|       | Alfalfa |          |                                              |          |     |
| Liver | hay     | Negative | differentiation of T lymphocytes             | 2.96E-04 | 97  |
|       | Alfalfa |          |                                              |          |     |
| Liver | hay     | Negative | development of macrophages                   | 3.01E-04 | 16  |
|       | Alfalfa |          |                                              |          |     |
| Liver | hay     | Negative | generation of blood cells                    | 3.03E-04 | 47  |
|       | Alfalfa |          |                                              |          |     |
| Liver | hay     | Negative | long-term potentiation of synapse            | 3.05E-04 | 43  |
|       | Alfalfa |          |                                              |          |     |
| Liver | hay     | Negative | abnormal morphology of nervous system        | 3.11E-04 | 175 |
|       | Alfalfa |          |                                              |          |     |
| Liver | hay     | Negative | benign neoplasia                             | 3.13E-04 | 219 |
|       | Alfalfa |          |                                              |          |     |
| Liver | hay     | Negative | cell movement of smooth muscle cells         | 3.13E-04 | 46  |
|       | Alfalfa |          |                                              |          |     |
| Liver | hay     | Negative | recurrent cancer                             | 3.13E-04 | 46  |
| Liver | Alfalfa | Negative | formation of muscle                          | 3.14E-04 | 101 |

|       |         |          |                                               |          |     |
|-------|---------|----------|-----------------------------------------------|----------|-----|
|       | hay     |          |                                               |          |     |
|       | Alfalfa |          |                                               |          |     |
| Liver | hay     | Negative | cell death of gonadal cell lines              | 3.26E-04 | 25  |
|       | Alfalfa |          |                                               |          |     |
| Liver | hay     | Negative | hyperplasia of blood cells                    | 3.26E-04 | 25  |
|       | Alfalfa |          |                                               |          |     |
| Liver | hay     | Negative | proliferation of fibroblast cell lines        | 3.26E-04 | 107 |
|       | Alfalfa |          |                                               |          |     |
| Liver | hay     | Negative | transactivation                               | 3.39E-04 | 142 |
|       | Alfalfa |          |                                               |          |     |
| Liver | hay     | Negative | cell death of B-lymphocyte derived cell lines | 3.40E-04 | 38  |
|       | Alfalfa |          |                                               |          |     |
| Liver | hay     | Negative | quantity of bone                              | 3.45E-04 | 66  |
|       | Alfalfa |          |                                               |          |     |
| Liver | hay     | Negative | B-cell leukemia                               | 3.46E-04 | 35  |
|       | Alfalfa |          |                                               |          |     |
| Liver | hay     | Negative | cell death of liver cells                     | 3.47E-04 | 54  |
|       | Alfalfa |          |                                               |          |     |
| Liver | hay     | Negative | proliferation of endothelial cells            | 3.50E-04 | 81  |
|       | Alfalfa |          |                                               |          |     |
| Liver | hay     | Negative | generation of leukocytes                      | 3.57E-04 | 46  |
|       | Alfalfa |          |                                               |          |     |
| Liver | hay     | Negative | refractory malignant tumor                    | 3.58E-04 | 29  |
|       | Alfalfa |          |                                               |          |     |
| Liver | hay     | Negative | synthesis of protein                          | 3.59E-04 | 112 |
|       | Alfalfa |          |                                               |          |     |
| Liver | hay     | Negative | colon carcinoma                               | 3.66E-04 | 758 |
|       | Alfalfa |          |                                               |          |     |
| Liver | hay     | Negative | synthesis of carbohydrate                     | 3.77E-04 | 107 |
|       | Alfalfa |          |                                               |          |     |
| Liver | hay     | Negative | advanced malignant tumor                      | 3.79E-04 | 201 |
|       | Alfalfa |          |                                               |          |     |
| Liver | hay     | Negative | autophagy of cells                            | 3.83E-04 | 70  |
|       | Alfalfa |          |                                               |          |     |
| Liver | hay     | Negative | hypoplasia of thorax                          | 3.87E-04 | 52  |
|       | Alfalfa |          |                                               |          |     |
| Liver | hay     | Negative | morphology of lung                            | 3.87E-04 | 52  |
|       | Alfalfa |          |                                               |          |     |
| Liver | hay     | Negative | aggregation of cells                          | 3.90E-04 | 84  |
|       | Alfalfa |          |                                               |          |     |
| Liver | hay     | Negative | metabolism of nucleotide                      | 3.92E-04 | 110 |
|       | Alfalfa |          |                                               |          |     |
| Liver | hay     | Negative | quantity of double-positive thymocyte         | 4.06E-04 | 34  |
| Liver | Alfalfa | Negative | quantity of muscle cells                      | 4.06E-04 | 35  |

|       |         |          |                                       |          |     |
|-------|---------|----------|---------------------------------------|----------|-----|
|       | hay     |          |                                       |          |     |
|       | Alfalfa |          |                                       |          |     |
| Liver | hay     | Negative | morphology of blood vessel            | 4.15E-04 | 74  |
|       | Alfalfa |          |                                       |          |     |
| Liver | hay     | Negative | gonadal tumor                         | 4.23E-04 | 195 |
|       | Alfalfa |          |                                       |          |     |
| Liver | hay     | Negative | function of muscle                    | 4.34E-04 | 89  |
|       | Alfalfa |          |                                       |          |     |
| Liver | hay     | Negative | generation of reactive oxygen species | 4.34E-04 | 56  |
|       | Alfalfa |          |                                       |          |     |
| Liver | hay     | Negative | cell death of sarcoma cell lines      | 4.35E-04 | 61  |
|       | Alfalfa |          |                                       |          |     |
| Liver | hay     | Negative | apoptosis of retinal cells            | 4.36E-04 | 18  |
|       | Alfalfa |          |                                       |          |     |
| Liver | hay     | Negative | function of heart                     | 4.52E-04 | 62  |
|       | Alfalfa |          |                                       |          |     |
| Liver | hay     | Negative | quantity of muscle                    | 4.62E-04 | 38  |
|       | Alfalfa |          |                                       |          |     |
| Liver | hay     | Negative | quantity of macrophages               | 4.62E-04 | 55  |
|       | Alfalfa |          |                                       |          |     |
| Liver | hay     | Negative | morphology of lymphocytes             | 4.63E-04 | 53  |
|       | Alfalfa |          |                                       |          |     |
| Liver | hay     | Negative | abnormal morphology of heart          | 4.63E-04 | 97  |
|       | Alfalfa |          |                                       |          |     |
| Liver | hay     | Negative | ulcerative colitis                    | 4.78E-04 | 33  |
|       | Alfalfa |          |                                       |          |     |
| Liver | hay     | Negative | secretion of molecule                 | 4.91E-04 | 135 |
|       | Alfalfa |          |                                       |          |     |
| Liver | hay     | Negative | migration of fibroblasts              | 4.94E-04 | 41  |
|       | Alfalfa |          |                                       |          |     |
| Liver | hay     | Negative | infection by HIV-1                    | 5.10E-04 | 148 |
|       | Alfalfa |          |                                       |          |     |
| Liver | hay     | Negative | abnormal morphology of spleen         | 5.11E-04 | 70  |
|       | Alfalfa |          |                                       |          |     |
| Liver | hay     | Negative | abnormal morphology of head           | 5.42E-04 | 197 |
|       | Alfalfa |          | abnormal morphology of mononuclear    |          |     |
| Liver | hay     | Negative | leukocytes                            | 5.48E-04 | 48  |
|       | Alfalfa |          |                                       |          |     |
| Liver | hay     | Negative | hypoplasia of organ                   | 5.57E-04 | 111 |
|       | Alfalfa |          |                                       |          |     |
| Liver | hay     | Negative | exocytosis                            | 5.58E-04 | 52  |
|       | Alfalfa |          |                                       |          |     |
| Liver | hay     | Negative | biosynthesis of purine ribonucleotide | 5.60E-04 | 31  |
| Liver | Alfalfa | Negative | peripheral arterial disease           | 5.73E-04 | 57  |



|       |         |          |                                             |          |     |
|-------|---------|----------|---------------------------------------------|----------|-----|
|       | hay     |          |                                             |          |     |
|       | Alfalfa |          |                                             |          |     |
| Liver | hay     | Negative | quantity of bone marrow cells               | 5.76E-04 | 47  |
|       | Alfalfa |          |                                             |          |     |
| Liver | hay     | Negative | activation of blood cells                   | 6.00E-04 | 178 |
|       | Alfalfa |          |                                             |          |     |
| Liver | hay     | Negative | transport of metal                          | 6.02E-04 | 85  |
|       | Alfalfa |          |                                             |          |     |
| Liver | hay     | Negative | cell death of carcinoma cell lines          | 6.03E-04 | 74  |
|       | Alfalfa |          |                                             |          |     |
| Liver | hay     | Negative | growth of lesion                            | 6.07E-04 | 189 |
|       | Alfalfa |          |                                             |          |     |
| Liver | hay     | Negative | development of body axis                    | 6.13E-04 | 244 |
|       | Alfalfa |          |                                             |          |     |
| Liver | hay     | Negative | Dermatitis                                  | 6.15E-04 | 108 |
|       | Alfalfa |          |                                             |          |     |
| Liver | hay     | Negative | abnormal morphology of rib cage             | 6.16E-04 | 28  |
|       | Alfalfa |          |                                             |          |     |
| Liver | hay     | Negative | morphology of head                          | 6.16E-04 | 206 |
|       | Alfalfa |          |                                             |          |     |
| Liver | hay     | Negative | response of mononuclear leukocytes          | 6.16E-04 | 62  |
|       | Alfalfa |          |                                             |          |     |
| Liver | hay     | Negative | colon adenocarcinoma                        | 6.18E-04 | 741 |
|       | Alfalfa |          |                                             |          |     |
| Liver | hay     | Negative | abnormal morphology of lung                 | 6.18E-04 | 50  |
|       | Alfalfa |          |                                             |          |     |
| Liver | hay     | Negative | fibrosis of heart                           | 6.18E-04 | 50  |
|       | Alfalfa |          |                                             |          |     |
| Liver | hay     | Negative | degeneration of central nervous system      | 6.18E-04 | 38  |
|       | Alfalfa |          |                                             |          |     |
| Liver | hay     | Negative | cell death of brain cells                   | 6.21E-04 | 71  |
|       | Alfalfa |          |                                             |          |     |
| Liver | hay     | Negative | proliferation of tumor cells                | 6.26E-04 | 116 |
|       | Alfalfa |          |                                             |          |     |
| Liver | hay     | Negative | cellular infiltration by granulocytes       | 6.26E-04 | 57  |
|       | Alfalfa |          |                                             |          |     |
| Liver | hay     | Negative | formation of hematopoietic progenitor cells | 6.30E-04 | 37  |
|       | Alfalfa |          | metabolism of nucleic acid component or     |          |     |
| Liver | hay     | Negative | derivative                                  | 6.33E-04 | 127 |
|       | Alfalfa |          |                                             |          |     |
| Liver | hay     | Negative | inflammation of intestine                   | 6.36E-04 | 73  |
|       | Alfalfa |          |                                             |          |     |
| Liver | hay     | Negative | muscular hypertrophy                        | 6.36E-04 | 55  |
| Liver | Alfalfa | Negative | abnormal morphology of lymphocytes          | 6.36E-04 | 47  |

|       |         |          |                                     |          |     |
|-------|---------|----------|-------------------------------------|----------|-----|
|       | hay     |          |                                     |          |     |
|       | Alfalfa |          |                                     |          |     |
| Liver | hay     | Negative | abnormal morphology of rib          | 6.37E-04 | 23  |
|       | Alfalfa |          |                                     |          |     |
| Liver | hay     | Negative | cartilage development               | 6.40E-04 | 41  |
|       | Alfalfa |          |                                     |          |     |
| Liver | hay     | Negative | apoptosis of leukocytes             | 6.44E-04 | 113 |
|       | Alfalfa |          |                                     |          |     |
| Liver | hay     | Negative | export of molecule                  | 6.55E-04 | 76  |
|       | Alfalfa |          |                                     |          |     |
| Liver | hay     | Negative | development of sensory organ        | 6.62E-04 | 137 |
|       | Alfalfa |          |                                     |          |     |
| Liver | hay     | Negative | central nervous system tumor        | 6.64E-04 | 214 |
|       | Alfalfa |          |                                     |          |     |
| Liver | hay     | Negative | aggregation of blood platelets      | 6.82E-04 | 52  |
|       | Alfalfa |          |                                     |          |     |
| Liver | hay     | Negative | influx of inorganic cation          | 6.82E-04 | 52  |
|       | Alfalfa |          |                                     |          |     |
| Liver | hay     | Negative | concentration of phospholipid       | 6.83E-04 | 50  |
|       | Alfalfa |          |                                     |          |     |
| Liver | hay     | Negative | Organ Degeneration                  | 6.94E-04 | 121 |
|       | Alfalfa |          |                                     |          |     |
| Liver | hay     | Negative | morphology of rib                   | 7.02E-04 | 24  |
|       | Alfalfa |          |                                     |          |     |
| Liver | hay     | Negative | fatty acid metabolism               | 7.02E-04 | 145 |
|       | Alfalfa |          |                                     |          |     |
| Liver | hay     | Negative | apoptosis of hepatocytes            | 7.02E-04 | 38  |
|       | Alfalfa |          |                                     |          |     |
| Liver | hay     | Negative | cell death of brain                 | 7.02E-04 | 75  |
|       | Alfalfa |          |                                     |          |     |
| Liver | hay     | Negative | abnormal morphology of blood vessel | 7.07E-04 | 69  |
|       | Alfalfa |          |                                     |          |     |
| Liver | hay     | Negative | dilation of heart ventricle         | 7.28E-04 | 19  |
|       | Alfalfa |          |                                     |          |     |
| Liver | hay     | Negative | growth of tumor                     | 7.31E-04 | 188 |
|       | Alfalfa |          |                                     |          |     |
| Liver | hay     | Negative | head and neck carcinoma             | 7.36E-04 | 117 |
|       | Alfalfa |          |                                     |          |     |
| Liver | hay     | Negative | cell viability of blood cells       | 7.62E-04 | 74  |
|       | Alfalfa |          |                                     |          |     |
| Liver | hay     | Negative | cell death of gonadal cells         | 7.67E-04 | 50  |
|       | Alfalfa |          |                                     |          |     |
| Liver | hay     | Negative | cytolysis                           | 7.94E-04 | 70  |
| Liver | Alfalfa | Negative | cell death of leukemia cell lines   | 8.00E-04 | 81  |

|       |         |          |                                           |          |     |
|-------|---------|----------|-------------------------------------------|----------|-----|
|       | hay     |          |                                           |          |     |
|       | Alfalfa |          |                                           |          |     |
| Liver | hay     | Negative | cell movement of antigen presenting cells | 8.00E-04 | 88  |
|       | Alfalfa |          |                                           |          |     |
| Liver | hay     | Negative | granulation tissue                        | 8.04E-04 | 15  |
|       | Alfalfa |          |                                           |          |     |
| Liver | hay     | Negative | morphology of mononuclear leukocytes      | 8.44E-04 | 54  |
|       | Alfalfa |          |                                           |          |     |
| Liver | hay     | Negative | morphology of cardiovascular tissue       | 8.48E-04 | 27  |
|       | Alfalfa |          |                                           |          |     |
| Liver | hay     | Negative | synthesis of nucleotide                   | 8.58E-04 | 91  |
|       | Alfalfa |          |                                           |          |     |
| Liver | hay     | Negative | development of bone marrow cells          | 8.80E-04 | 28  |
|       | Alfalfa |          |                                           |          |     |
| Liver | hay     | Negative | thrombosis of vein                        | 8.80E-04 | 20  |
|       | Alfalfa |          |                                           |          |     |
| Liver | hay     | Negative | keratosis                                 | 8.82E-04 | 35  |
|       | Alfalfa |          |                                           |          |     |
| Liver | hay     | Negative | apoptosis of T lymphocytes                | 8.90E-04 | 72  |
|       | Alfalfa |          |                                           |          |     |
| Liver | hay     | Negative | morphology of secondary lymphoid organ    | 8.90E-04 | 72  |
|       | Alfalfa |          |                                           |          |     |
| Liver | hay     | Negative | secondary neoplasm of digestive system    | 8.90E-04 | 66  |
|       | Alfalfa |          |                                           |          |     |
| Liver | hay     | Negative | formation of eye                          | 8.97E-04 | 108 |
|       | Alfalfa |          |                                           |          |     |
| Liver | hay     | Negative | hyperplasia of leukocytes                 | 8.97E-04 | 22  |
|       | Alfalfa |          |                                           |          |     |
| Liver | hay     | Negative | colony formation of cells                 | 9.05E-04 | 120 |
|       | Alfalfa |          |                                           |          |     |
| Liver | hay     | Negative | apoptosis of heart cells                  | 9.05E-04 | 51  |
|       | Alfalfa |          |                                           |          |     |
| Liver | hay     | Negative | expansion of cells                        | 9.24E-04 | 77  |
|       | Alfalfa |          |                                           |          |     |
| Liver | hay     | Negative | anemia                                    | 9.31E-04 | 87  |
|       | Alfalfa |          |                                           |          |     |
| Liver | hay     | Negative | apoptosis of lymphocytes                  | 9.31E-04 | 87  |
|       | Alfalfa |          |                                           |          |     |
| Liver | hay     | Negative | apoptosis of eye cells                    | 9.52E-04 | 19  |
|       | Alfalfa |          |                                           |          |     |
| Liver | hay     | Negative | proliferation of epithelial cells         | 9.63E-04 | 120 |
|       | Alfalfa |          |                                           |          |     |
| Liver | hay     | Negative | neurotransmission                         | 9.63E-04 | 102 |
| Liver | Alfalfa | Negative | proliferation of dermal cells             | 9.65E-04 | 48  |

|       |         |          |                                            |          |     |
|-------|---------|----------|--------------------------------------------|----------|-----|
|       | hay     |          |                                            |          |     |
|       | Alfalfa |          |                                            |          |     |
| Liver | hay     | Negative | necrosis of liver                          | 9.83E-04 | 62  |
|       | Alfalfa |          |                                            |          |     |
| Liver | hay     | Negative | growth of plasma membrane projections      | 9.98E-04 | 114 |
|       | Alfalfa |          |                                            |          |     |
| Liver | hay     | Negative | cell death of kidney cell lines            | 1.00E-03 | 77  |
|       | Alfalfa |          |                                            |          |     |
| Liver | hay     | Negative | metastasis                                 | 1.02E-03 | 179 |
|       | Alfalfa |          |                                            |          |     |
| Liver | hay     | Negative | cell death of cerebral cortex cells        | 1.03E-03 | 60  |
|       | Alfalfa |          |                                            |          |     |
| Liver | hay     | Negative | Budd-Chiari syndrome                       | 1.03E-03 | 11  |
|       | Alfalfa |          |                                            |          |     |
| Liver | hay     | Negative | apoptosis of neurons                       | 1.03E-03 | 107 |
|       | Alfalfa |          |                                            |          |     |
| Liver | hay     | Negative | growth of thymus gland                     | 1.06E-03 | 29  |
|       | Alfalfa |          |                                            |          |     |
| Liver | hay     | Negative | congenital malformation of skeleton        | 1.08E-03 | 104 |
|       | Alfalfa |          |                                            |          |     |
| Liver | hay     | Negative | proliferation of epidermal cells           | 1.08E-03 | 46  |
|       | Alfalfa |          |                                            |          |     |
| Liver | hay     | Negative | apoptosis of fibrosarcoma cell lines       | 1.12E-03 | 20  |
|       | Alfalfa |          |                                            |          |     |
| Liver | hay     | Negative | graft-vs-host disease                      | 1.12E-03 | 16  |
|       | Alfalfa |          |                                            |          |     |
| Liver | hay     | Negative | I-kappaB kinase/NF-kappaB cascade          | 1.16E-03 | 47  |
|       | Alfalfa |          |                                            |          |     |
| Liver | hay     | Negative | apoptosis of mononuclear leukocytes        | 1.17E-03 | 89  |
|       | Alfalfa |          |                                            |          |     |
| Liver | hay     | Negative | apoptosis of neuroblastoma cell lines      | 1.19E-03 | 35  |
|       | Alfalfa |          |                                            |          |     |
| Liver | hay     | Negative | invasion of tissue                         | 1.19E-03 | 52  |
|       | Alfalfa |          |                                            |          |     |
| Liver | hay     | Negative | dephosphorylation of protein               | 1.22E-03 | 50  |
|       | Alfalfa |          |                                            |          |     |
| Liver | hay     | Negative | size of animal                             | 1.23E-03 | 48  |
|       | Alfalfa |          |                                            |          |     |
| Liver | hay     | Negative | vascularization of body region             | 1.25E-03 | 38  |
|       | Alfalfa |          |                                            |          |     |
| Liver | hay     | Negative | migration of smooth muscle cells           | 1.25E-03 | 41  |
|       | Alfalfa |          |                                            |          |     |
| Liver | hay     | Negative | cell death of central nervous system cells | 1.28E-03 | 74  |
| Liver | Alfalfa | Negative | function of lymphocytes                    | 1.28E-03 | 85  |

|       |         |          |                              |          |      |
|-------|---------|----------|------------------------------|----------|------|
|       | hay     |          |                              |          |      |
|       | Alfalfa |          |                              |          |      |
| Liver | hay     | Negative | apoptosis of fibroblasts     | 1.28E-03 | 57   |
|       | Alfalfa |          |                              |          |      |
| Liver | hay     | Negative | outgrowth of cells           | 1.29E-03 | 106  |
|       | Alfalfa |          |                              |          |      |
| Liver | hay     | Negative | adult leukemia               | 1.30E-03 | 12   |
|       | Alfalfa |          |                              |          |      |
| Liver | hay     | Negative | apoptosis of osteoclasts     | 1.30E-03 | 12   |
|       | Rice    |          |                              |          |      |
| Liver | straw   | Positive | proliferation of cells       | 2.10E-29 | 1198 |
|       | Rice    |          |                              |          |      |
| Liver | straw   | Positive | cell death                   | 7.03E-28 | 1091 |
|       | Rice    |          |                              |          |      |
| Liver | straw   | Positive | malignant solid tumor        | 5.07E-25 | 2994 |
|       | Rice    |          |                              |          |      |
| Liver | straw   | Positive | cancer                       | 2.48E-24 | 3023 |
|       | Rice    |          |                              |          |      |
| Liver | straw   | Positive | necrosis                     | 1.31E-22 | 850  |
|       | Rice    |          |                              |          |      |
| Liver | straw   | Positive | organization of cytoplasm    | 6.17E-22 | 546  |
|       | Rice    |          |                              |          |      |
| Liver | straw   | Positive | transport of molecule        | 1.39E-21 | 568  |
|       | Rice    |          |                              |          |      |
| Liver | straw   | Positive | cell movement                | 3.91E-21 | 716  |
|       | Rice    |          |                              |          |      |
| Liver | straw   | Positive | morphology of cells          | 4.18E-21 | 663  |
|       | Rice    |          |                              |          |      |
| Liver | straw   | Positive | apoptosis                    | 7.30E-21 | 860  |
|       | Rice    |          |                              |          |      |
| Liver | straw   | Positive | organismal death             | 7.28E-20 | 785  |
|       | Rice    |          |                              |          |      |
| Liver | straw   | Positive | morbidity or mortality       | 1.87E-19 | 792  |
|       | Rice    |          |                              |          |      |
| Liver | straw   | Positive | cell survival                | 3.50E-18 | 488  |
|       | Rice    |          |                              |          |      |
| Liver | straw   | Positive | organization of cytoskeleton | 7.97E-18 | 487  |
|       | Rice    |          |                              |          |      |
| Liver | straw   | Positive | cell viability               | 1.22E-17 | 458  |
|       | Rice    |          |                              |          |      |
| Liver | straw   | Positive | migration of cells           | 4.82E-17 | 631  |
|       | Rice    |          |                              |          |      |
| Liver | straw   | Positive | cellular homeostasis         | 8.29E-16 | 515  |
| Liver | Rice    | Positive | differentiation of cells     | 2.09E-15 | 721  |

|       |       |          |                                   |          |      |
|-------|-------|----------|-----------------------------------|----------|------|
|       | straw |          |                                   |          |      |
|       | Rice  |          |                                   |          |      |
| Liver | straw | Positive | neoplasia of epithelial tissue    | 3.13E-14 | 2467 |
|       | Rice  |          |                                   |          |      |
| Liver | straw | Positive | tumorigenesis of tissue           | 5.42E-14 | 2503 |
|       | Rice  |          |                                   |          |      |
| Liver | straw | Positive | microtubule dynamics              | 1.16E-13 | 406  |
|       | Rice  |          |                                   |          |      |
| Liver | straw | Positive | expression of RNA                 | 1.54E-13 | 681  |
|       | Rice  |          |                                   |          |      |
| Liver | straw | Positive | epithelial cancer                 | 2.13E-13 | 2439 |
|       | Rice  |          |                                   |          |      |
| Liver | straw | Positive | transcription                     | 3.87E-13 | 636  |
|       | Rice  |          |                                   |          |      |
| Liver | straw | Positive | transcription of RNA              | 4.23E-13 | 597  |
|       | Rice  |          |                                   |          |      |
| Liver | straw | Positive | quantity of cells                 | 5.54E-13 | 571  |
|       | Rice  |          |                                   |          |      |
| Liver | straw | Positive | abdominal neoplasm                | 3.43E-12 | 2434 |
|       | Rice  |          |                                   |          |      |
| Liver | straw | Positive | development of cytoplasm          | 5.01E-12 | 177  |
|       | Rice  |          |                                   |          |      |
| Liver | straw | Positive | angiogenesis                      | 5.01E-12 | 316  |
|       | Rice  |          |                                   |          |      |
| Liver | straw | Positive | vasculogenesis                    | 5.01E-12 | 264  |
|       | Rice  |          |                                   |          |      |
| Liver | straw | Positive | concentration of lipid            | 7.87E-12 | 286  |
|       | Rice  |          |                                   |          |      |
| Liver | straw | Positive | abdominal cancer                  | 2.88E-11 | 2400 |
|       | Rice  |          |                                   |          |      |
| Liver | straw | Positive | formation of cytoskeleton         | 4.39E-11 | 146  |
|       | Rice  |          |                                   |          |      |
| Liver | straw | Positive | transcription of DNA              | 4.75E-11 | 494  |
|       | Rice  |          |                                   |          |      |
| Liver | straw | Positive | organization of organelle         | 6.36E-11 | 198  |
|       | Rice  |          |                                   |          |      |
| Liver | straw | Positive | cell movement of tumor cell lines | 1.33E-10 | 293  |
|       | Rice  |          |                                   |          |      |
| Liver | straw | Positive | invasion of cells                 | 1.65E-10 | 298  |
|       | Rice  |          |                                   |          |      |
| Liver | straw | Positive | Movement Disorders                | 1.65E-10 | 354  |
|       | Rice  |          |                                   |          |      |
| Liver | straw | Positive | proliferation of tumor cell lines | 1.86E-10 | 494  |
| Liver | Rice  | Positive | quantity of leukocytes            | 2.35E-10 | 311  |

|       |       |          |                                    |          |     |
|-------|-------|----------|------------------------------------|----------|-----|
|       | straw |          |                                    |          |     |
|       | Rice  |          |                                    |          |     |
| Liver | straw | Positive | cell death of tumor cell lines     | 3.54E-10 | 486 |
|       | Rice  |          |                                    |          |     |
| Liver | straw | Positive | formation of filaments             | 3.73E-10 | 150 |
|       | Rice  |          |                                    |          |     |
| Liver | straw | Positive | fibrogenesis                       | 4.89E-10 | 154 |
|       | Rice  |          |                                    |          |     |
| Liver | straw | Positive | quantity of blood cells            | 5.48E-10 | 342 |
|       | Rice  |          |                                    |          |     |
| Liver | straw | Positive | cell viability of tumor cell lines | 1.67E-09 | 266 |
|       | Rice  |          |                                    |          |     |
| Liver | straw | Positive | neuronal cell death                | 2.13E-09 | 236 |
|       | Rice  |          |                                    |          |     |
| Liver | straw | Positive | synthesis of lipid                 | 2.13E-09 | 246 |
|       | Rice  |          |                                    |          |     |
| Liver | straw | Positive | size of body                       | 2.13E-09 | 287 |
|       | Rice  |          |                                    |          |     |
| Liver | straw | Positive | protein kinase cascade             | 2.15E-09 | 155 |
|       | Rice  |          |                                    |          |     |
| Liver | straw | Positive | transactivation                    | 2.32E-09 | 204 |
|       | Rice  |          |                                    |          |     |
| Liver | straw | Positive | abnormal morphology of cells       | 2.32E-09 | 407 |
|       | Rice  |          |                                    |          |     |
| Liver | straw | Positive | formation of cellular protrusions  | 2.37E-09 | 302 |
|       | Rice  |          |                                    |          |     |
| Liver | straw | Positive | dyskinesia                         | 6.94E-09 | 214 |
|       | Rice  |          |                                    |          |     |
| Liver | straw | Positive | growth of connective tissue        | 8.29E-09 | 222 |
|       | Rice  |          |                                    |          |     |
| Liver | straw | Positive | cell movement of myeloid cells     | 8.29E-09 | 190 |
|       | Rice  |          |                                    |          |     |
| Liver | straw | Positive | disorder of basal ganglia          | 8.29E-09 | 259 |
|       | Rice  |          |                                    |          |     |
| Liver | straw | Positive | neurological signs                 | 8.61E-09 | 224 |
|       | Rice  |          |                                    |          |     |
| Liver | straw | Positive | migration of blood cells           | 1.10E-08 | 290 |
|       | Rice  |          |                                    |          |     |
| Liver | straw | Positive | cell movement of phagocytes        | 1.29E-08 | 192 |
|       | Rice  |          |                                    |          |     |
| Liver | straw | Positive | leukocyte migration                | 1.41E-08 | 289 |
|       | Rice  |          |                                    |          |     |
| Liver | straw | Positive | quantity of carbohydrate           | 1.55E-08 | 182 |
| Liver | Rice  | Positive | neuromuscular disease              | 1.55E-08 | 292 |

|       |       |          |                                          |          |      |
|-------|-------|----------|------------------------------------------|----------|------|
|       | straw |          |                                          |          |      |
|       | Rice  |          |                                          |          |      |
| Liver | straw | Positive | proliferation of connective tissue cells | 1.55E-08 | 205  |
|       | Rice  |          |                                          |          |      |
| Liver | straw | Positive | homing of cells                          | 1.72E-08 | 194  |
|       | Rice  |          |                                          |          |      |
| Liver | straw | Positive | Viral Infection                          | 1.89E-08 | 499  |
|       | Rice  |          |                                          |          |      |
| Liver | straw | Positive | morphology of body cavity                | 2.29E-08 | 381  |
|       | Rice  |          |                                          |          |      |
| Liver | straw | Positive | transactivation of RNA                   | 2.44E-08 | 189  |
|       | Rice  |          |                                          |          |      |
| Liver | straw | Positive | concentration of fatty acid              | 2.44E-08 | 106  |
|       | Rice  |          |                                          |          |      |
| Liver | straw | Positive | formation of actin filaments             | 2.54E-08 | 114  |
|       | Rice  |          |                                          |          |      |
| Liver | straw | Positive | digestive organ tumor                    | 3.02E-08 | 2084 |
|       | Rice  |          |                                          |          |      |
| Liver | straw | Positive | development of cardiovascular tissue     | 3.94E-08 | 134  |
|       | Rice  |          |                                          |          |      |
| Liver | straw | Positive | chemotaxis of cells                      | 4.15E-08 | 183  |
|       | Rice  |          |                                          |          |      |
| Liver | straw | Positive | homing                                   | 4.77E-08 | 197  |
|       | Rice  |          |                                          |          |      |
| Liver | straw | Positive | cell movement of leukocytes              | 4.88E-08 | 255  |
|       | Rice  |          |                                          |          |      |
| Liver | straw | Positive | digestive system cancer                  | 5.27E-08 | 2063 |
|       | Rice  |          |                                          |          |      |
| Liver | straw | Positive | Organ Degeneration                       | 5.44E-08 | 172  |
|       | Rice  |          |                                          |          |      |
| Liver | straw | Positive | formation of actin stress fibers         | 6.05E-08 | 92   |
|       | Rice  |          |                                          |          |      |
| Liver | straw | Positive | phosphorylation of protein               | 6.36E-08 | 245  |
|       | Rice  |          |                                          |          |      |
| Liver | straw | Positive | cell death of connective tissue cells    | 6.83E-08 | 205  |
|       | Rice  |          |                                          |          |      |
| Liver | straw | Positive | apoptosis of tumor cell lines            | 8.24E-08 | 382  |
|       | Rice  |          |                                          |          |      |
| Liver | straw | Positive | chemotaxis                               | 8.48E-08 | 187  |
|       | Rice  |          |                                          |          |      |
| Liver | straw | Positive | Huntington's Disease                     | 8.49E-08 | 196  |
|       | Rice  |          |                                          |          |      |
| Liver | straw | Positive | metabolism of carbohydrate               | 8.71E-08 | 210  |
| Liver | Rice  | Positive | abnormal morphology of body cavity       | 9.59E-08 | 362  |



|       |       |          |                                        |          |     |
|-------|-------|----------|----------------------------------------|----------|-----|
|       | straw |          |                                        |          |     |
|       | Rice  |          |                                        |          |     |
| Liver | straw | Positive | migration of tumor cell lines          | 1.21E-07 | 235 |
|       | Rice  |          |                                        |          |     |
| Liver | straw | Positive | development of endothelial tissue      | 1.21E-07 | 131 |
|       | Rice  |          |                                        |          |     |
| Liver | straw | Positive | development of body trunk              | 1.30E-07 | 354 |
|       | Rice  |          |                                        |          |     |
| Liver | straw | Positive | endothelial cell development           | 1.31E-07 | 127 |
|       | Rice  |          |                                        |          |     |
| Liver | straw | Positive | invasion of tumor cell lines           | 1.62E-07 | 222 |
|       | Rice  |          |                                        |          |     |
| Liver | straw | Positive | morphology of cardiovascular system    | 1.88E-07 | 208 |
|       | Rice  |          |                                        |          |     |
| Liver | straw | Positive | engulfment of cells                    | 1.97E-07 | 143 |
|       | Rice  |          |                                        |          |     |
| Liver | straw | Positive | inflammatory response                  | 2.21E-07 | 255 |
|       | Rice  |          |                                        |          |     |
| Liver | straw | Positive | seizure disorder                       | 2.45E-07 | 162 |
|       | Rice  |          |                                        |          |     |
| Liver | straw | Positive | development of epithelial tissue       | 2.91E-07 | 176 |
|       | Rice  |          |                                        |          |     |
| Liver | straw | Positive | endocytosis                            | 2.97E-07 | 123 |
|       | Rice  |          |                                        |          |     |
| Liver | straw | Positive | secretory pathway                      | 3.58E-07 | 76  |
|       | Rice  |          |                                        |          |     |
| Liver | straw | Positive | cell cycle progression                 | 4.38E-07 | 331 |
|       | Rice  |          |                                        |          |     |
| Liver | straw | Positive | abnormal morphology of thoracic cavity | 5.22E-07 | 196 |
|       | Rice  |          |                                        |          |     |
| Liver | straw | Positive | exocytosis                             | 7.02E-07 | 73  |
|       | Rice  |          |                                        |          |     |
| Liver | straw | Positive | uptake of monosaccharide               | 7.15E-07 | 98  |
|       | Rice  |          |                                        |          |     |
| Liver | straw | Positive | development of vasculature             | 8.95E-07 | 144 |
|       | Rice  |          |                                        |          |     |
| Liver | straw | Positive | seizures                               | 9.16E-07 | 138 |
|       | Rice  |          |                                        |          |     |
| Liver | straw | Positive | quantity of mononuclear leukocytes     | 9.17E-07 | 239 |
|       | Rice  |          |                                        |          |     |
| Liver | straw | Positive | activation of DNA endogenous promoter  | 9.76E-07 | 375 |
|       | Rice  |          |                                        |          |     |
| Liver | straw | Positive | degeneration of nervous system         | 1.06E-06 | 103 |
| Liver | Rice  | Positive | growth of organism                     | 1.09E-06 | 268 |

|       |       |          |                                          |          |     |
|-------|-------|----------|------------------------------------------|----------|-----|
|       | straw |          |                                          |          |     |
|       | Rice  |          |                                          |          |     |
| Liver | straw | Positive | development of connective tissue         | 1.09E-06 | 129 |
|       | Rice  |          |                                          |          |     |
| Liver | straw | Positive | necrosis of epithelial tissue            | 1.12E-06 | 195 |
|       | Rice  |          |                                          |          |     |
| Liver | straw | Positive | behavior                                 | 1.14E-06 | 312 |
|       | Rice  |          |                                          |          |     |
| Liver | straw | Positive | long-term potentiation                   | 1.43E-06 | 89  |
|       | Rice  |          |                                          |          |     |
| Liver | straw | Positive | proliferation of blood cells             | 1.51E-06 | 269 |
|       | Rice  |          |                                          |          |     |
| Liver | straw | Positive | ion homeostasis of cells                 | 2.15E-06 | 184 |
|       | Rice  |          |                                          |          |     |
| Liver | straw | Positive | invasion of carcinoma cell lines         | 2.28E-06 | 74  |
|       | Rice  |          |                                          |          |     |
| Liver | straw | Positive | uptake of carbohydrate                   | 2.28E-06 | 103 |
|       | Rice  |          |                                          |          |     |
| Liver | straw | Positive | learning                                 | 2.34E-06 | 142 |
|       | Rice  |          |                                          |          |     |
| Liver | straw | Positive | cognition                                | 2.40E-06 | 153 |
|       | Rice  |          |                                          |          |     |
| Liver | straw | Positive | function of leukocytes                   | 2.40E-06 | 178 |
|       | Rice  |          |                                          |          |     |
| Liver | straw | Positive | perinatal death                          | 2.45E-06 | 195 |
|       | Rice  |          |                                          |          |     |
| Liver | straw | Positive | interphase                               | 2.84E-06 | 213 |
|       | Rice  |          |                                          |          |     |
| Liver | straw | Positive | quantity of lymphocytes                  | 2.90E-06 | 228 |
|       | Rice  |          |                                          |          |     |
| Liver | straw | Positive | cell movement of fibroblasts             | 2.90E-06 | 69  |
|       | Rice  |          |                                          |          |     |
| Liver | straw | Positive | hypersensitive reaction                  | 2.95E-06 | 145 |
|       | Rice  |          |                                          |          |     |
| Liver | straw | Positive | formation of plasma membrane projections | 3.23E-06 | 195 |
|       | Rice  |          |                                          |          |     |
| Liver | straw | Positive | neuritogenesis                           | 3.24E-06 | 191 |
|       | Rice  |          |                                          |          |     |
| Liver | straw | Positive | cell movement of connective tissue cells | 3.76E-06 | 81  |
|       | Rice  |          |                                          |          |     |
| Liver | straw | Positive | cell death of blood cells                | 4.18E-06 | 223 |
|       | Rice  |          |                                          |          |     |
| Liver | straw | Positive | activation of cells                      | 4.50E-06 | 305 |
| Liver | Rice  | Positive | quantity of metal                        | 4.50E-06 | 165 |

|       |       |          |                                              |          |     |
|-------|-------|----------|----------------------------------------------|----------|-----|
|       | straw |          |                                              |          |     |
|       | Rice  |          |                                              |          |     |
| Liver | straw | Positive | morphology of heart                          | 4.55E-06 | 137 |
|       | Rice  |          |                                              |          |     |
| Liver | straw | Positive | organization of actin cytoskeleton           | 4.65E-06 | 105 |
|       | Rice  |          |                                              |          |     |
| Liver | straw | Positive | proliferation of neuronal cells              | 4.86E-06 | 188 |
|       | Rice  |          |                                              |          |     |
| Liver | straw | Positive | reorganization of cytoskeleton               | 4.91E-06 | 71  |
|       | Rice  |          |                                              |          |     |
| Liver | straw | Positive | chemotaxis of phagocytes                     | 5.17E-06 | 103 |
|       | Rice  |          |                                              |          |     |
| Liver | straw | Positive | degeneration of cells                        | 5.30E-06 | 118 |
|       | Rice  |          |                                              |          |     |
| Liver | straw | Positive | proliferation of immune cells                | 5.48E-06 | 251 |
|       | Rice  |          |                                              |          |     |
| Liver | straw | Positive | cell death of epithelial cells               | 5.78E-06 | 164 |
|       | Rice  |          |                                              |          |     |
| Liver | straw | Positive | abnormal morphology of cardiovascular system | 5.96E-06 | 185 |
|       | Rice  |          |                                              |          |     |
| Liver | straw | Positive | cell movement of carcinoma cell lines        | 6.29E-06 | 75  |
|       | Rice  |          |                                              |          |     |
| Liver | straw | Positive | Growth Failure                               | 6.37E-06 | 194 |
|       | Rice  |          |                                              |          |     |
| Liver | straw | Positive | cell death of immune cells                   | 6.37E-06 | 212 |
|       | Rice  |          |                                              |          |     |
| Liver | straw | Positive | differentiation of connective tissue cells   | 6.45E-06 | 207 |
|       | Rice  |          |                                              |          |     |
| Liver | straw | Positive | uterine serous papillary cancer              | 6.45E-06 | 83  |
|       | Rice  |          |                                              |          |     |
| Liver | straw | Positive | synthesis of carbohydrate                    | 6.81E-06 | 142 |
|       | Rice  |          |                                              |          |     |
| Liver | straw | Positive | migration of connective tissue cells         | 7.52E-06 | 67  |
|       | Rice  |          |                                              |          |     |
| Liver | straw | Positive | function of blood cells                      | 7.72E-06 | 190 |
|       | Rice  |          |                                              |          |     |
| Liver | straw | Positive | colony formation                             | 8.31E-06 | 175 |
|       | Rice  |          |                                              |          |     |
| Liver | straw | Positive | cell movement of granulocytes                | 8.76E-06 | 125 |
|       | Rice  |          |                                              |          |     |
| Liver | straw | Positive | proliferation of endothelial cells           | 8.99E-06 | 107 |
|       | Rice  |          |                                              |          |     |
| Liver | straw | Positive | cell death of fibroblast cell lines          | 9.48E-06 | 142 |
| Liver | Rice  | Positive | chemotaxis of myeloid cells                  | 9.80E-06 | 101 |

|       |       |          |                                           |          |     |
|-------|-------|----------|-------------------------------------------|----------|-----|
|       | straw |          |                                           |          |     |
|       | Rice  |          |                                           |          |     |
| Liver | straw | Positive | differentiation of connective tissue      | 1.14E-05 | 231 |
|       | Rice  |          |                                           |          |     |
| Liver | straw | Positive | colony formation of cells                 | 1.16E-05 | 161 |
|       | Rice  |          |                                           |          |     |
| Liver | straw | Positive | metabolism of nucleotide                  | 1.18E-05 | 145 |
|       | Rice  |          |                                           |          |     |
| Liver | straw | Positive | morphology of head                        | 1.18E-05 | 273 |
|       | Rice  |          |                                           |          |     |
| Liver | straw | Positive | influx of Ca <sup>2+</sup>                | 1.28E-05 | 68  |
|       | Rice  |          |                                           |          |     |
| Liver | straw | Positive | cell movement of neutrophils              | 1.40E-05 | 102 |
|       | Rice  |          |                                           |          |     |
| Liver | straw | Positive | influx of cation                          | 1.46E-05 | 70  |
|       | Rice  |          |                                           |          |     |
| Liver | straw | Positive | long-term potentiation of synapse         | 1.49E-05 | 56  |
|       | Rice  |          |                                           |          |     |
| Liver | straw | Positive | plasticity of synapse                     | 1.53E-05 | 47  |
|       | Rice  |          |                                           |          |     |
| Liver | straw | Positive | dephosphorylation of protein              | 1.53E-05 | 68  |
|       | Rice  |          |                                           |          |     |
| Liver | straw | Positive | quantity of connective tissue             | 1.64E-05 | 193 |
|       | Rice  |          |                                           |          |     |
| Liver | straw | Positive | cell movement of macrophages              | 1.90E-05 | 92  |
|       | Rice  |          |                                           |          |     |
| Liver | straw | Positive | fatty acid metabolism                     | 1.93E-05 | 192 |
|       | Rice  |          |                                           |          |     |
| Liver | straw | Positive | Neurodegeneration                         | 1.95E-05 | 105 |
|       | Rice  |          |                                           |          |     |
| Liver | straw | Positive | proliferation of mononuclear leukocytes   | 1.95E-05 | 232 |
|       | Rice  |          |                                           |          |     |
| Liver | straw | Positive | accumulation of cells                     | 1.97E-05 | 118 |
|       | Rice  |          |                                           |          |     |
| Liver | straw | Positive | female genital tract serous cancer        | 1.99E-05 | 128 |
|       | Rice  |          |                                           |          |     |
| Liver | straw | Positive | growth of lesion                          | 2.03E-05 | 249 |
|       | Rice  |          |                                           |          |     |
| Liver | straw | Positive | cell movement of antigen presenting cells | 2.08E-05 | 117 |
|       | Rice  |          |                                           |          |     |
| Liver | straw | Positive | influx of inorganic cation                | 2.08E-05 | 69  |
|       | Rice  |          |                                           |          |     |
| Liver | straw | Positive | quantity of metal ion                     | 2.15E-05 | 145 |
| Liver | Rice  | Positive | branching of cells                        | 2.20E-05 | 123 |

|       |       |          |                                          |          |     |
|-------|-------|----------|------------------------------------------|----------|-----|
|       | straw |          |                                          |          |     |
|       | Rice  |          |                                          |          |     |
| Liver | straw | Positive | synthesis of nucleotide                  | 2.24E-05 | 121 |
|       | Rice  |          |                                          |          |     |
| Liver | straw | Positive | secretion of molecule                    | 2.31E-05 | 177 |
|       | Rice  |          |                                          |          |     |
| Liver | straw | Positive | binding of DNA                           | 2.32E-05 | 168 |
|       | Rice  |          |                                          |          |     |
| Liver | straw | Positive | formation of skin                        | 2.32E-05 | 122 |
|       | Rice  |          |                                          |          |     |
| Liver | straw | Positive | activation of antigen presenting cells   | 2.41E-05 | 107 |
|       | Rice  |          |                                          |          |     |
| Liver | straw | Positive | growth of tumor                          | 2.45E-05 | 248 |
|       | Rice  |          |                                          |          |     |
| Liver | straw | Positive | proliferation of lymphocytes             | 2.49E-05 | 228 |
|       | Rice  |          |                                          |          |     |
| Liver | straw | Positive | Dermatitis                               | 2.60E-05 | 142 |
|       | Rice  |          |                                          |          |     |
| Liver | straw | Positive | metabolism of membrane lipid derivative  | 2.67E-05 | 128 |
|       | Rice  |          |                                          |          |     |
| Liver | straw | Positive | killing of macrophages                   | 2.76E-05 | 12  |
|       | Rice  |          |                                          |          |     |
| Liver | straw | Positive | concentration of acylglycerol            | 2.81E-05 | 112 |
|       | Rice  |          |                                          |          |     |
| Liver | straw | Positive | growth of epithelial tissue              | 2.87E-05 | 214 |
|       | Rice  |          |                                          |          |     |
| Liver | straw | Positive | allergy                                  | 2.87E-05 | 133 |
|       | Rice  |          |                                          |          |     |
| Liver | straw | Positive | flux of ion                              | 3.25E-05 | 108 |
|       | Rice  |          |                                          |          |     |
| Liver | straw | Positive | transport of carbohydrate                | 3.39E-05 | 69  |
|       | Rice  |          |                                          |          |     |
| Liver | straw | Positive | morphology of lymphatic system component | 3.58E-05 | 136 |
|       | Rice  |          |                                          |          |     |
| Liver | straw | Positive | demyelination                            | 3.64E-05 | 46  |
|       | Rice  |          |                                          |          |     |
| Liver | straw | Positive | differentiation of muscle cell lines     | 3.75E-05 | 59  |
|       | Rice  |          |                                          |          |     |
| Liver | straw | Positive | abnormal morphology of heart             | 3.80E-05 | 126 |
|       | Rice  |          |                                          |          |     |
| Liver | straw | Positive | migration of fibroblasts                 | 3.97E-05 | 53  |
|       | Rice  |          |                                          |          |     |
| Liver | straw | Positive | cell movement of endothelial cells       | 4.04E-05 | 117 |
| Liver | Rice  | Positive | quantity of Ca <sup>2+</sup>             | 4.42E-05 | 133 |

|       |       |          |                                                    |          |     |
|-------|-------|----------|----------------------------------------------------|----------|-----|
|       | straw |          |                                                    |          |     |
|       | Rice  |          |                                                    |          |     |
| Liver | straw | Positive | autophagy                                          | 4.71E-05 | 123 |
|       | Rice  |          |                                                    |          |     |
| Liver | straw | Positive | formation of cells                                 | 4.81E-05 | 299 |
|       | Rice  |          |                                                    |          |     |
| Liver | straw | Positive | organization of filaments                          | 4.86E-05 | 72  |
|       | Rice  |          |                                                    |          |     |
| Liver | straw | Positive | growth of lymphatic system component               | 4.86E-05 | 68  |
|       | Rice  |          |                                                    |          |     |
| Liver | straw | Positive | morphology of heart ventricle                      | 4.86E-05 | 68  |
|       | Rice  |          |                                                    |          |     |
| Liver | straw | Positive | transport of protein                               | 5.06E-05 | 101 |
|       | Rice  |          |                                                    |          |     |
| Liver | straw | Positive | morphology of muscle                               | 5.38E-05 | 111 |
|       | Rice  |          |                                                    |          |     |
| Liver | straw | Positive | proliferation of smooth muscle cells               | 5.38E-05 | 96  |
|       | Rice  |          |                                                    |          |     |
| Liver | straw | Positive | permeability of cells                              | 5.41E-05 | 39  |
|       | Rice  |          |                                                    |          |     |
| Liver | straw | Positive | abnormal morphology of head                        | 5.54E-05 | 256 |
|       | Rice  |          |                                                    |          |     |
| Liver | straw | Positive | quantity of myeloid cells                          | 5.59E-05 | 117 |
|       | Rice  |          |                                                    |          |     |
| Liver | straw | Positive | dysmyelination                                     | 5.92E-05 | 50  |
|       | Rice  |          |                                                    |          |     |
| Liver | straw | Positive | flux of cation                                     | 6.01E-05 | 102 |
|       | Rice  |          |                                                    |          |     |
| Liver | straw | Positive | accumulation of blood cells                        | 6.02E-05 | 94  |
|       | Rice  |          |                                                    |          |     |
| Liver | straw | Positive | growth of muscle tissue                            | 6.09E-05 | 122 |
|       | Rice  |          |                                                    |          |     |
| Liver | straw | Positive | synthesis of DNA                                   | 6.21E-05 | 135 |
|       | Rice  |          |                                                    |          |     |
| Liver | straw | Positive | metabolism of nucleic acid component or derivative | 6.24E-05 | 165 |
|       | Rice  |          |                                                    |          |     |
| Liver | straw | Positive | transport of alpha-amino acid                      | 6.36E-05 | 30  |
|       | Rice  |          |                                                    |          |     |
| Liver | straw | Positive | abnormal morphology of abdomen                     | 6.44E-05 | 268 |
|       | Rice  |          |                                                    |          |     |
| Liver | straw | Positive | cell movement of muscle cells                      | 6.46E-05 | 64  |
|       | Rice  |          |                                                    |          |     |
| Liver | straw | Positive | quantity of phagocytes                             | 6.48E-05 | 137 |
| Liver | Rice  | Positive | ubiquitination                                     | 6.53E-05 | 111 |

|       |       |          |                                        |          |     |
|-------|-------|----------|----------------------------------------|----------|-----|
|       | straw |          |                                        |          |     |
|       | Rice  |          |                                        |          |     |
| Liver | straw | Positive | development of neurons                 | 6.70E-05 | 241 |
|       | Rice  |          |                                        |          |     |
| Liver | straw | Positive | quantity of lymphatic system component | 6.88E-05 | 123 |
|       | Rice  |          |                                        |          |     |
| Liver | straw | Positive | activation of leukocytes               | 6.96E-05 | 217 |
|       | Rice  |          |                                        |          |     |
| Liver | straw | Positive | hydrolysis of lipid                    | 6.99E-05 | 66  |
|       | Rice  |          |                                        |          |     |
| Liver | straw | Positive | concentration of phosphatidic acid     | 6.99E-05 | 50  |
|       | Rice  |          |                                        |          |     |
| Liver | straw | Positive | proliferation of muscle cells          | 7.01E-05 | 121 |
|       | Rice  |          |                                        |          |     |
| Liver | straw | Positive | cellular infiltration by macrophages   | 7.78E-05 | 57  |
|       | Rice  |          |                                        |          |     |
| Liver | straw | Positive | transport of monosaccharide            | 7.78E-05 | 57  |
|       | Rice  |          |                                        |          |     |
| Liver | straw | Positive | cell death of brain                    | 7.97E-05 | 97  |
|       | Rice  |          |                                        |          |     |
| Liver | straw | Positive | flux of Ca <sup>2+</sup>               | 7.97E-05 | 95  |
|       | Rice  |          |                                        |          |     |
| Liver | straw | Positive | benign neoplasia                       | 8.18E-05 | 281 |
|       | Rice  |          |                                        |          |     |
| Liver | straw | Positive | ubiquitination of protein              | 8.22E-05 | 109 |
|       | Rice  |          |                                        |          |     |
| Liver | straw | Positive | receptor-mediated endocytosis          | 8.26E-05 | 53  |
|       | Rice  |          |                                        |          |     |
| Liver | straw | Positive | flux of inorganic cation               | 8.26E-05 | 100 |
|       | Rice  |          |                                        |          |     |
| Liver | straw | Positive | homing of blood cells                  | 8.26E-05 | 123 |
|       | Rice  |          |                                        |          |     |
| Liver | straw | Positive | export of molecule                     | 8.27E-05 | 98  |
|       | Rice  |          |                                        |          |     |
| Liver | straw | Positive | neurotransmission                      | 8.27E-05 | 133 |
|       | Rice  |          |                                        |          |     |
| Liver | straw | Positive | release of fatty acid                  | 8.31E-05 | 60  |
|       | Rice  |          |                                        |          |     |
| Liver | straw | Positive | transport of cation                    | 8.31E-05 | 130 |
|       | Rice  |          |                                        |          |     |
| Liver | straw | Positive | sprouting                              | 8.73E-05 | 125 |
|       | Rice  |          |                                        |          |     |
| Liver | straw | Positive | adhesion of immune cells               | 8.91E-05 | 114 |
| Liver | Rice  | Positive | development of body axis               | 9.12E-05 | 316 |

|       |       |          |                                     |          |     |
|-------|-------|----------|-------------------------------------|----------|-----|
|       | straw |          |                                     |          |     |
|       | Rice  |          |                                     |          |     |
| Liver | straw | Positive | degeneration of neurons             | 9.30E-05 | 81  |
|       | Rice  |          |                                     |          |     |
| Liver | straw | Positive | cell death of epithelial cell lines | 9.30E-05 | 94  |
|       | Rice  |          |                                     |          |     |
| Liver | straw | Positive | experimentally-induced diabetes     | 9.55E-05 | 37  |
|       | Rice  |          |                                     |          |     |
| Liver | straw | Positive | cell death of hippocampal neurons   | 9.91E-05 | 34  |
|       | Rice  |          |                                     |          |     |
| Liver | straw | Positive | concentration of phospholipid       | 1.01E-04 | 64  |
|       | Rice  |          |                                     |          |     |
| Liver | straw | Positive | metastasis of cells                 | 1.02E-04 | 84  |
|       | Rice  |          |                                     |          |     |
| Liver | straw | Positive | morphology of nervous system        | 1.03E-04 | 240 |
|       | Rice  |          |                                     |          |     |
| Liver | straw | Positive | cellular infiltration by leukocytes | 1.06E-04 | 125 |
|       | Rice  |          |                                     |          |     |
| Liver | straw | Positive | transmigration of cells             | 1.10E-04 | 56  |
|       | Rice  |          |                                     |          |     |
| Liver | straw | Positive | cognitive impairment                | 1.20E-04 | 108 |
|       | Rice  |          |                                     |          |     |
| Liver | straw | Positive | metabolism of protein               | 1.20E-04 | 293 |
|       | Rice  |          |                                     |          |     |
| Liver | straw | Positive | epileptic seizure                   | 1.20E-04 | 59  |
|       | Rice  |          |                                     |          |     |
| Liver | straw | Positive | epilepsy                            | 1.20E-04 | 101 |
|       | Rice  |          |                                     |          |     |
| Liver | straw | Positive | release of eicosanoid               | 1.20E-04 | 51  |
|       | Rice  |          |                                     |          |     |
| Liver | straw | Positive | cell death of hippocampal cells     | 1.22E-04 | 37  |
|       | Rice  |          |                                     |          |     |
| Liver | straw | Positive | hydrolysis of phosphoinositide      | 1.23E-04 | 25  |
|       | Rice  |          |                                     |          |     |
| Liver | straw | Positive | infection by RNA virus              | 1.23E-04 | 263 |
|       | Rice  |          |                                     |          |     |
| Liver | straw | Positive | cellular degradation                | 1.23E-04 | 85  |
|       | Rice  |          |                                     |          |     |
| Liver | straw | Positive | morphology of bone                  | 1.23E-04 | 143 |
|       | Rice  |          |                                     |          |     |
| Liver | straw | Positive | cell death of lymphocytes           | 1.23E-04 | 124 |
|       | Rice  |          |                                     |          |     |
| Liver | straw | Positive | abnormal morphology of bone         | 1.23E-04 | 139 |
| Liver | Rice  | Positive | apoptosis of fibroblast cell lines  | 1.23E-04 | 107 |



|       |       |          |                                            |          |     |
|-------|-------|----------|--------------------------------------------|----------|-----|
|       | straw |          |                                            |          |     |
|       | Rice  |          |                                            |          |     |
| Liver | straw | Positive | migration of endothelial cells             | 1.23E-04 | 107 |
|       | Rice  |          |                                            |          |     |
| Liver | straw | Positive | activation of blood cells                  | 1.23E-04 | 229 |
|       | Rice  |          |                                            |          |     |
| Liver | straw | Positive | uptake of D-glucose                        | 1.23E-04 | 75  |
|       | Rice  |          |                                            |          |     |
| Liver | straw | Positive | cell death of heart                        | 1.28E-04 | 77  |
|       | Rice  |          |                                            |          |     |
| Liver | straw | Positive | cell death of T lymphocytes                | 1.28E-04 | 103 |
|       | Rice  |          |                                            |          |     |
| Liver | straw | Positive | transport of ion                           | 1.33E-04 | 159 |
|       | Rice  |          |                                            |          |     |
| Liver | straw | Positive | cancer of cells                            | 1.37E-04 | 85  |
|       | Rice  |          |                                            |          |     |
| Liver | straw | Positive | apoptosis of blood cells                   | 1.38E-04 | 156 |
|       | Rice  |          |                                            |          |     |
| Liver | straw | Positive | migration of muscle cells                  | 1.41E-04 | 58  |
|       | Rice  |          |                                            |          |     |
| Liver | straw | Positive | differentiation of bone cells              | 1.42E-04 | 130 |
|       | Rice  |          |                                            |          |     |
| Liver | straw | Positive | cell death of central nervous system cells | 1.43E-04 | 96  |
|       | Rice  |          |                                            |          |     |
| Liver | straw | Positive | replication of RNA virus                   | 1.43E-04 | 159 |
|       | Rice  |          |                                            |          |     |
| Liver | straw | Positive | cell death of mononuclear leukocytes       | 1.43E-04 | 127 |
|       | Rice  |          |                                            |          |     |
| Liver | straw | Positive | formation of muscle                        | 1.43E-04 | 127 |
|       | Rice  |          |                                            |          |     |
| Liver | straw | Positive | homing of leukocytes                       | 1.47E-04 | 121 |
|       | Rice  |          |                                            |          |     |
| Liver | straw | Positive | abnormal morphology of heart ventricle     | 1.48E-04 | 61  |
|       | Rice  |          |                                            |          |     |
| Liver | straw | Positive | release of neurotransmitter                | 1.52E-04 | 55  |
|       | Rice  |          |                                            |          |     |
| Liver | straw | Positive | transport of metal                         | 1.56E-04 | 108 |
|       | Rice  |          |                                            |          |     |
| Liver | straw | Positive | arthropathy                                | 1.70E-04 | 286 |
|       | Rice  |          |                                            |          |     |
| Liver | straw | Positive | development of head                        | 1.70E-04 | 294 |
|       | Rice  |          |                                            |          |     |
| Liver | straw | Positive | infection by Retroviridae                  | 1.70E-04 | 220 |
| Liver | Rice  | Positive | HIV infection                              | 1.70E-04 | 218 |

|       |       |          |                                              |          |     |
|-------|-------|----------|----------------------------------------------|----------|-----|
|       | straw |          |                                              |          |     |
|       | Rice  |          |                                              |          |     |
| Liver | straw | Positive | chemotaxis of leukocytes                     | 1.75E-04 | 114 |
|       | Rice  |          |                                              |          |     |
| Liver | straw | Positive | morphology of lymphoid organ                 | 1.81E-04 | 125 |
|       | Rice  |          |                                              |          |     |
| Liver | straw | Positive | syndromic mental retardation                 | 1.81E-04 | 55  |
|       | Rice  |          |                                              |          |     |
| Liver | straw | Positive | morphology of connective tissue              | 1.93E-04 | 145 |
|       | Rice  |          |                                              |          |     |
| Liver | straw | Positive | cell death of heart cells                    | 1.96E-04 | 74  |
|       | Rice  |          |                                              |          |     |
| Liver | straw | Positive | arthritis                                    | 1.96E-04 | 281 |
|       | Rice  |          |                                              |          |     |
| Liver | straw | Positive | abnormal morphology of nervous system        | 2.09E-04 | 221 |
|       | Rice  |          |                                              |          |     |
| Liver | straw | Positive | transport of inorganic cation                | 2.09E-04 | 113 |
|       | Rice  |          |                                              |          |     |
| Liver | straw | Positive | S phase                                      | 2.10E-04 | 86  |
|       | Rice  |          |                                              |          |     |
| Liver | straw | Positive | neutropenia                                  | 2.10E-04 | 19  |
|       | Rice  |          |                                              |          |     |
| Liver | straw | Positive | apoptosis of epithelial cell lines           | 2.10E-04 | 75  |
|       | Rice  |          |                                              |          |     |
| Liver | straw | Positive | serous neoplasm                              | 2.10E-04 | 188 |
|       | Rice  |          |                                              |          |     |
| Liver | straw | Positive | I-kappaB kinase/NF-kappaB cascade            | 2.10E-04 | 60  |
|       | Rice  |          |                                              |          |     |
| Liver | straw | Positive | production of reactive oxygen species        | 2.11E-04 | 117 |
|       | Rice  |          |                                              |          |     |
| Liver | straw | Positive | concentration of eicosanoid                  | 2.11E-04 | 42  |
|       | Rice  |          |                                              |          |     |
| Liver | straw | Positive | quantity of B lymphocytes                    | 2.11E-04 | 111 |
|       | Rice  |          |                                              |          |     |
| Liver | straw | Positive | concentration of Ca <sup>2+</sup>            | 2.11E-04 | 46  |
|       | Rice  |          |                                              |          |     |
| Liver | straw | Positive | small GTPase mediated signal transduction    | 2.14E-04 | 63  |
|       | Rice  |          |                                              |          |     |
| Liver | straw | Positive | release of arachidonic acid                  | 2.14E-04 | 35  |
|       | Rice  |          |                                              |          |     |
| Liver | straw | Positive | mitosis                                      | 2.17E-04 | 155 |
|       | Rice  |          |                                              |          |     |
| Liver | straw | Positive | cell viability of cervical cancer cell lines | 2.17E-04 | 74  |
| Liver | Rice  | Positive | synthesis of fatty acid                      | 2.18E-04 | 101 |

|       |       |          |                                           |          |     |
|-------|-------|----------|-------------------------------------------|----------|-----|
|       | straw |          |                                           |          |     |
|       | Rice  |          |                                           |          |     |
| Liver | straw | Positive | proliferation of fibroblasts              | 2.23E-04 | 113 |
|       | Rice  |          |                                           |          |     |
| Liver | straw | Positive | mass of connective tissue                 | 2.24E-04 | 68  |
|       | Rice  |          |                                           |          |     |
| Liver | straw | Positive | proliferation of lymphatic system cells   | 2.24E-04 | 68  |
|       | Rice  |          |                                           |          |     |
| Liver | straw | Positive | accumulation of lipid                     | 2.26E-04 | 97  |
|       | Rice  |          |                                           |          |     |
| Liver | straw | Positive | development of blood cells                | 2.28E-04 | 200 |
|       | Rice  |          |                                           |          |     |
| Liver | straw | Positive | development of lymphatic system component | 2.31E-04 | 100 |
|       | Rice  |          |                                           |          |     |
| Liver | straw | Positive | proliferation of T lymphocytes            | 2.34E-04 | 186 |
|       | Rice  |          |                                           |          |     |
| Liver | straw | Positive | homeostasis of ion                        | 2.40E-04 | 79  |
|       | Rice  |          |                                           |          |     |
| Liver | straw | Positive | quantity of steroid                       | 2.43E-04 | 146 |
|       | Rice  |          |                                           |          |     |
| Liver | straw | Positive | binding of endothelial cells              | 2.43E-04 | 39  |
|       | Rice  |          |                                           |          |     |
| Liver | straw | Positive | infection of cells                        | 2.46E-04 | 241 |
|       | Rice  |          |                                           |          |     |
| Liver | straw | Positive | degeneration of central nervous system    | 2.47E-04 | 47  |
|       | Rice  |          |                                           |          |     |
| Liver | straw | Positive | apoptosis of neurons                      | 2.47E-04 | 137 |
|       | Rice  |          |                                           |          |     |
| Liver | straw | Positive | maturation of cells                       | 2.51E-04 | 143 |
|       | Rice  |          |                                           |          |     |
| Liver | straw | Positive | growth of embryo                          | 2.51E-04 | 149 |
|       | Rice  |          |                                           |          |     |
| Liver | straw | Positive | quantity of hematopoietic cells           | 2.55E-04 | 139 |
|       | Rice  |          |                                           |          |     |
| Liver | straw | Positive | experimentally-induced arthritis          | 2.57E-04 | 53  |
|       | Rice  |          |                                           |          |     |
| Liver | straw | Positive | neurodegeneration of cerebral cortex      | 2.58E-04 | 24  |
|       | Rice  |          |                                           |          |     |
| Liver | straw | Positive | proliferation of glomerular cells         | 2.58E-04 | 24  |
|       | Rice  |          |                                           |          |     |
| Liver | straw | Positive | proliferation of mesangial cells          | 2.59E-04 | 21  |
|       | Rice  |          |                                           |          |     |
| Liver | straw | Positive | size of animal                            | 2.62E-04 | 61  |
| Liver | Rice  | Positive | cell death of brain cells                 | 2.63E-04 | 89  |

|       |       |          |                                            |          |     |
|-------|-------|----------|--------------------------------------------|----------|-----|
|       | straw |          |                                            |          |     |
|       | Rice  |          |                                            |          |     |
| Liver | straw | Positive | homeostasis of inorganic cation            | 2.65E-04 | 64  |
|       | Rice  |          |                                            |          |     |
| Liver | straw | Positive | apoptosis of leukocytes                    | 2.68E-04 | 143 |
|       | Rice  |          |                                            |          |     |
| Liver | straw | Positive | synaptic transmission                      | 2.74E-04 | 108 |
|       | Rice  |          |                                            |          |     |
| Liver | straw | Positive | development of leukocytes                  | 2.77E-04 | 181 |
|       | Rice  |          |                                            |          |     |
| Liver | straw | Positive | cell death of cerebral cortex cells        | 2.77E-04 | 76  |
|       | Rice  |          |                                            |          |     |
| Liver | straw | Positive | formation of leukocytes                    | 2.81E-04 | 55  |
|       | Rice  |          |                                            |          |     |
| Liver | straw | Positive | activation of neuroglia                    | 2.92E-04 | 47  |
|       | Rice  |          |                                            |          |     |
| Liver | straw | Positive | proliferation of fibroblast cell lines     | 2.93E-04 | 133 |
|       | Rice  |          |                                            |          |     |
| Liver | straw | Positive | modification of peptide                    | 2.95E-04 | 39  |
|       | Rice  |          |                                            |          |     |
| Liver | straw | Positive | abnormal morphology of embryonic tissue    | 2.99E-04 | 169 |
|       | Rice  |          |                                            |          |     |
| Liver | straw | Positive | muscle contraction                         | 2.99E-04 | 81  |
|       | Rice  |          |                                            |          |     |
| Liver | straw | Positive | quantity of bone                           | 2.99E-04 | 81  |
|       | Rice  |          |                                            |          |     |
| Liver | straw | Positive | metabolism of monosaccharide               | 2.99E-04 | 44  |
|       | Rice  |          |                                            |          |     |
| Liver | straw | Positive | activation of phagocytes                   | 2.99E-04 | 118 |
|       | Rice  |          |                                            |          |     |
| Liver | straw | Positive | cellular infiltration                      | 3.12E-04 | 137 |
|       | Rice  |          |                                            |          |     |
| Liver | straw | Positive | neovascularization                         | 3.16E-04 | 56  |
|       | Rice  |          |                                            |          |     |
| Liver | straw | Positive | quantity of hematopoietic progenitor cells | 3.16E-04 | 138 |
|       | Rice  |          |                                            |          |     |
| Liver | straw | Positive | Bleeding                                   | 3.16E-04 | 133 |
|       | Rice  |          |                                            |          |     |
| Liver | straw | Positive | aggregation of cells                       | 3.19E-04 | 104 |
|       | Rice  |          |                                            |          |     |
| Liver | straw | Positive | function of cardiovascular system          | 3.19E-04 | 117 |
|       | Rice  |          |                                            |          |     |
| Liver | straw | Positive | accumulation of leukocytes                 | 3.29E-04 | 87  |
| Liver | Rice  | Positive | quantity of T lymphocytes                  | 3.35E-04 | 165 |

|       |       |          |                                       |          |     |
|-------|-------|----------|---------------------------------------|----------|-----|
|       | straw |          |                                       |          |     |
|       | Rice  |          |                                       |          |     |
| Liver | straw | Positive | growth of renal glomerulus            | 3.36E-04 | 28  |
|       | Rice  |          |                                       |          |     |
| Liver | straw | Positive | cleavage of lipid                     | 3.43E-04 | 67  |
|       | Rice  |          |                                       |          |     |
| Liver | straw | Positive | autophagy of cells                    | 3.50E-04 | 86  |
|       | Rice  |          |                                       |          |     |
| Liver | straw | Positive | transport of L-amino acid             | 3.52E-04 | 26  |
|       | Rice  |          |                                       |          |     |
| Liver | straw | Positive | excitatory postsynaptic potential     | 3.60E-04 | 44  |
|       | Rice  |          |                                       |          |     |
| Liver | straw | Positive | transport of metal ion                | 3.64E-04 | 102 |
|       | Rice  |          |                                       |          |     |
| Liver | straw | Positive | differentiation of muscle             | 3.72E-04 | 97  |
|       | Rice  |          |                                       |          |     |
| Liver | straw | Positive | development of lymphocytes            | 3.72E-04 | 170 |
|       | Rice  |          |                                       |          |     |
| Liver | straw | Positive | advanced malignant tumor              | 3.82E-04 | 253 |
|       | Rice  |          |                                       |          |     |
| Liver | straw | Positive | chronic psoriasis                     | 3.82E-04 | 50  |
|       | Rice  |          |                                       |          |     |
| Liver | straw | Positive | concentration of sterol               | 3.85E-04 | 98  |
|       | Rice  |          |                                       |          |     |
| Liver | straw | Positive | quantity of granulocytes              | 3.88E-04 | 101 |
|       | Rice  |          |                                       |          |     |
| Liver | straw | Positive | intracranial hemorrhage               | 3.91E-04 | 49  |
|       | Rice  |          |                                       |          |     |
| Liver | straw | Positive | migration of carcinoma cell lines     | 3.93E-04 | 58  |
|       | Rice  |          |                                       |          |     |
| Liver | straw | Positive | cell transformation                   | 3.96E-04 | 143 |
|       | Rice  |          |                                       |          |     |
| Liver | straw | Positive | apoptosis of kidney cell lines        | 3.97E-04 | 78  |
|       | Rice  |          |                                       |          |     |
| Liver | straw | Positive | development of mononuclear leukocytes | 3.97E-04 | 171 |
|       | Rice  |          |                                       |          |     |
| Liver | straw | Positive | entrance of Ca <sup>2+</sup>          | 3.97E-04 | 30  |
|       | Rice  |          |                                       |          |     |
| Liver | straw | Positive | abnormal morphology of lymphoid organ | 3.97E-04 | 119 |
|       | Rice  |          |                                       |          |     |
| Liver | straw | Positive | replication of virus                  | 3.97E-04 | 172 |
|       | Rice  |          |                                       |          |     |
| Liver | straw | Positive | cell death of tumor                   | 4.05E-04 | 120 |
| Liver | Rice  | Positive | oxidative stress response of cells    | 4.05E-04 | 25  |

|       |       |          |                                         |          |     |
|-------|-------|----------|-----------------------------------------|----------|-----|
|       | straw |          |                                         |          |     |
|       | Rice  |          |                                         |          |     |
| Liver | straw | Positive | concentration of triacylglycerol        | 4.22E-04 | 98  |
|       | Rice  |          |                                         |          |     |
| Liver | straw | Positive | proliferation of leukemia cell lines    | 4.30E-04 | 70  |
|       | Rice  |          |                                         |          |     |
| Liver | straw | Positive | abnormal quantity of lipid              | 4.32E-04 | 51  |
|       | Rice  |          |                                         |          |     |
| Liver | straw | Positive | homeostasis of metal ion                | 4.33E-04 | 62  |
|       | Rice  |          |                                         |          |     |
| Liver | straw | Positive | development of abdomen                  | 4.34E-04 | 177 |
|       | Rice  |          |                                         |          |     |
| Liver | straw | Positive | neurodegeneration of brain              | 4.34E-04 | 40  |
|       | Rice  |          |                                         |          |     |
| Liver | straw | Positive | inflammation of organ                   | 4.40E-04 | 344 |
|       | Rice  |          |                                         |          |     |
| Liver | straw | Positive | serine phosphorylation of peptide       | 4.48E-04 | 32  |
|       | Rice  |          |                                         |          |     |
| Liver | straw | Positive | cell movement of mononuclear leukocytes | 4.59E-04 | 143 |
|       | Rice  |          |                                         |          |     |
| Liver | straw | Positive | growth of neurites                      | 4.59E-04 | 143 |
|       | Rice  |          |                                         |          |     |
| Liver | straw | Positive | phagocytosis                            | 4.59E-04 | 95  |
|       | Rice  |          |                                         |          |     |
| Liver | straw | Positive | vascularization                         | 4.70E-04 | 77  |
|       | Rice  |          |                                         |          |     |
| Liver | straw | Positive | consumption of oxygen                   | 4.70E-04 | 53  |
|       | Rice  |          |                                         |          |     |
| Liver | straw | Positive | concentration of cholesterol            | 4.70E-04 | 93  |
|       | Rice  |          |                                         |          |     |
| Liver | straw | Positive | assembly of protein-protein complex     | 4.70E-04 | 63  |
|       | Rice  |          |                                         |          |     |
| Liver | straw | Positive | morphology of respiratory system        | 4.78E-04 | 99  |
|       | Rice  |          |                                         |          |     |
| Liver | straw | Positive | abnormal morphology of skull            | 4.90E-04 | 72  |
|       | Rice  |          |                                         |          |     |
| Liver | straw | Positive | differentiation of epithelial tissue    | 4.90E-04 | 113 |
|       | Rice  |          |                                         |          |     |
| Liver | straw | Positive | branching of neurites                   | 4.90E-04 | 89  |
|       | Rice  |          |                                         |          |     |
| Liver | straw | Positive | serine phosphorylation                  | 4.96E-04 | 35  |
|       | Rice  |          |                                         |          |     |
| Liver | straw | Positive | cell death of kidney cells              | 4.96E-04 | 110 |
| Liver | Rice  | Positive | growth of plasma membrane projections   | 4.96E-04 | 144 |

|       |       |          |                                           |          |     |
|-------|-------|----------|-------------------------------------------|----------|-----|
|       | straw |          |                                           |          |     |
|       | Rice  |          |                                           |          |     |
| Liver | straw | Positive | cell viability of blood cells             | 4.96E-04 | 92  |
|       | Rice  |          |                                           |          |     |
| Liver | straw | Positive | adhesion of blood cells                   | 4.98E-04 | 118 |
|       | Rice  |          |                                           |          |     |
| Liver | straw | Positive | degeneration of brain                     | 5.01E-04 | 44  |
|       | Rice  |          |                                           |          |     |
| Liver | straw | Positive | necrosis of tumor                         | 5.07E-04 | 119 |
|       | Rice  |          |                                           |          |     |
| Liver | straw | Positive | peripheral vascular disease               | 5.07E-04 | 119 |
|       | Rice  |          |                                           |          |     |
| Liver | straw | Positive | abnormal morphology of right ventricle    | 5.09E-04 | 21  |
|       | Rice  |          |                                           |          |     |
| Liver | straw | Positive | homeostasis of divalent cations           | 5.11E-04 | 50  |
|       | Rice  |          |                                           |          |     |
| Liver | straw | Positive | proliferation of hematopoietic cell lines | 5.15E-04 | 73  |
|       | Rice  |          |                                           |          |     |
| Liver | straw | Positive | development of lymphatic system           | 5.15E-04 | 112 |
|       | Rice  |          |                                           |          |     |
| Liver | straw | Positive | neonatal death                            | 5.21E-04 | 136 |
|       | Rice  |          |                                           |          |     |
| Liver | straw | Positive | mass of adipose tissue                    | 5.30E-04 | 63  |
|       | Rice  |          |                                           |          |     |
| Liver | straw | Positive | morphology of right ventricle             | 5.37E-04 | 23  |
|       | Rice  |          |                                           |          |     |
| Liver | straw | Positive | phosphorylation of L-amino acid           | 5.45E-04 | 72  |
|       | Rice  |          |                                           |          |     |
| Liver | straw | Positive | cell movement of lymphocytes              | 5.45E-04 | 123 |
|       | Rice  |          |                                           |          |     |
| Liver | straw | Positive | mobilization of cells                     | 5.54E-04 | 32  |
|       | Rice  |          |                                           |          |     |
| Liver | straw | Positive | vascularization of body region            | 5.55E-04 | 47  |
|       | Rice  |          |                                           |          |     |
| Liver | straw | Positive | synthesis of phospholipid                 | 5.58E-04 | 59  |
|       | Rice  |          |                                           |          |     |
| Liver | straw | Positive | homeostasis of leukocytes                 | 5.86E-04 | 169 |
|       | Rice  |          |                                           |          |     |
| Liver | straw | Positive | necrosis of kidney                        | 5.93E-04 | 114 |
|       | Rice  |          |                                           |          |     |
| Liver | straw | Positive | autophosphorylation of protein            | 6.06E-04 | 54  |
|       | Rice  |          |                                           |          |     |
| Liver | straw | Positive | quantity of polyunsaturated fatty acids   | 6.07E-04 | 43  |
| Liver | Rice  | Positive | morphology of skin                        | 6.11E-04 | 87  |

|       |       |          |                                           |          |     |
|-------|-------|----------|-------------------------------------------|----------|-----|
|       | straw |          |                                           |          |     |
|       | Rice  |          |                                           |          |     |
| Liver | straw | Positive | metastasis                                | 6.28E-04 | 227 |
|       | Rice  |          |                                           |          |     |
| Liver | straw | Positive | cell death of kidney cell lines           | 6.35E-04 | 96  |
|       | Rice  |          |                                           |          |     |
| Liver | straw | Positive | muscular hypertrophy                      | 6.39E-04 | 67  |
|       | Rice  |          |                                           |          |     |
| Liver | straw | Positive | activation of Protein kinase              | 6.43E-04 | 81  |
|       | Rice  |          |                                           |          |     |
| Liver | straw | Positive | cellular infiltration of phagocytes       | 6.46E-04 | 59  |
|       | Rice  |          |                                           |          |     |
| Liver | straw | Positive | branching of neurons                      | 6.46E-04 | 91  |
|       | Rice  |          |                                           |          |     |
| Liver | straw | Positive | necrosis of cardiac muscle                | 6.50E-04 | 71  |
|       | Rice  |          |                                           |          |     |
| Liver | straw | Positive | activation of macrophages                 | 6.50E-04 | 77  |
|       | Rice  |          |                                           |          |     |
| Liver | straw | Positive | abnormal morphology of respiratory system | 6.50E-04 | 97  |
|       | Rice  |          |                                           |          |     |
| Liver | straw | Positive | autosomal recessive disease               | 6.50E-04 | 272 |
|       | Rice  |          |                                           |          |     |
| Liver | straw | Positive | synthesis of purine nucleotide            | 6.75E-04 | 58  |
|       | Rice  |          |                                           |          |     |
| Liver | straw | Positive | recruitment of leukocytes                 | 6.92E-04 | 102 |
|       | Rice  |          |                                           |          |     |
| Liver | straw | Positive | quantity of antigen presenting cells      | 7.08E-04 | 88  |
|       | Rice  |          |                                           |          |     |
| Liver | straw | Positive | exocytosis by cells                       | 7.09E-04 | 44  |
|       | Rice  |          |                                           |          |     |
| Liver | straw | Positive | cell viability of mononuclear leukocytes  | 7.09E-04 | 65  |
|       | Rice  |          |                                           |          |     |
| Liver | straw | Positive | outgrowth of neurites                     | 7.27E-04 | 125 |
|       | Rice  |          |                                           |          |     |
| Liver | straw | Positive | transport of D-glucose                    | 7.27E-04 | 49  |
|       | Rice  |          |                                           |          |     |
| Liver | straw | Positive | morphogenesis of neurons                  | 7.29E-04 | 131 |
|       | Rice  |          |                                           |          |     |
| Liver | straw | Positive | migration of mesenchymal cells            | 7.61E-04 | 17  |
|       | Rice  |          |                                           |          |     |
| Liver | straw | Positive | chemotaxis of antigen presenting cells    | 7.61E-04 | 52  |
|       | Rice  |          |                                           |          |     |
| Liver | straw | Positive | chronic myeloid leukemia                  | 7.62E-04 | 38  |
| Liver | Rice  | Positive | exocytosis of granules                    | 7.62E-04 | 13  |



|       |       |          |                                            |          |     |
|-------|-------|----------|--------------------------------------------|----------|-----|
|       | straw |          |                                            |          |     |
|       | Rice  |          |                                            |          |     |
| Liver | straw | Positive | internalization of lipid                   | 7.62E-04 | 13  |
|       | Rice  |          |                                            |          |     |
| Liver | straw | Positive | necrosis of muscle                         | 7.90E-04 | 107 |
|       | Rice  |          |                                            |          |     |
| Liver | straw | Positive | size of embryo                             | 7.90E-04 | 111 |
|       | Rice  |          |                                            |          |     |
| Liver | straw | Positive | hypertrophy of cardiomyocytes              | 7.96E-04 | 46  |
|       | Rice  |          |                                            |          |     |
| Liver | straw | Positive | transport of amino acids                   | 7.96E-04 | 46  |
|       | Rice  |          |                                            |          |     |
| Liver | straw | Positive | cell movement of smooth muscle cells       | 8.09E-04 | 54  |
|       | Rice  |          |                                            |          |     |
| Liver | straw | Positive | hydrolysis of carbohydrate                 | 8.19E-04 | 45  |
|       | Rice  |          |                                            |          |     |
| Liver | straw | Positive | T cell development                         | 8.27E-04 | 153 |
|       | Rice  |          |                                            |          |     |
| Liver | straw | Positive | neoplasia of cells                         | 8.36E-04 | 136 |
|       | Rice  |          |                                            |          |     |
| Liver | straw | Positive | miniature excitatory postsynaptic currents | 8.36E-04 | 24  |
|       | Rice  |          |                                            |          |     |
| Liver | straw | Positive | relaxation of muscle                       | 8.38E-04 | 31  |
|       | Rice  |          |                                            |          |     |
| Liver | straw | Positive | shape change of neurites                   | 8.40E-04 | 90  |
|       | Rice  |          |                                            |          |     |
| Liver | straw | Positive | transport of synaptic vesicles             | 8.53E-04 | 27  |
|       | Rice  |          |                                            |          |     |
| Liver | straw | Positive | activation of enzyme                       | 8.55E-04 | 120 |
|       | Rice  |          |                                            |          |     |
| Liver | straw | Positive | immediate hypersensitivity                 | 8.61E-04 | 100 |
|       | Rice  |          |                                            |          |     |
| Liver | straw | Positive | synthesis of progesterone                  | 8.63E-04 | 32  |
|       | Rice  |          |                                            |          |     |
| Liver | straw | Positive | Lymphocyte homeostasis                     | 8.63E-04 | 165 |
|       | Rice  |          |                                            |          |     |
| Liver | straw | Positive | outgrowth of cells                         | 8.66E-04 | 133 |
|       | Rice  |          |                                            |          |     |
| Liver | straw | Positive | keratosis                                  | 8.67E-04 | 42  |
|       | Rice  |          |                                            |          |     |
| Liver | straw | Positive | abnormal morphology of skeleton            | 8.78E-04 | 86  |
|       | Rice  |          |                                            |          |     |
| Liver | straw | Positive | phagocytosis of cells                      | 8.78E-04 | 86  |
| Liver | Rice  | Positive | differentiation of muscle cells            | 8.89E-04 | 89  |

|       |       |          |                                      |          |     |  |
|-------|-------|----------|--------------------------------------|----------|-----|--|
|       | straw |          |                                      |          |     |  |
|       | Rice  |          |                                      |          |     |  |
| Liver | straw | Positive | binding of mononuclear leukocytes    | 8.94E-04 | 40  |  |
|       | Rice  |          |                                      |          |     |  |
| Liver | straw | Positive | binding of lymphocytes               | 8.95E-04 | 34  |  |
|       | Rice  |          |                                      |          |     |  |
| Liver | straw | Positive | uptake of fatty acid                 | 9.04E-04 | 28  |  |
|       | Rice  |          |                                      |          |     |  |
| Liver | straw | Positive | mental retardation                   | 9.07E-04 | 75  |  |
|       | Rice  |          |                                      |          |     |  |
| Liver | straw | Positive | metabolism of phospholipid           | 9.07E-04 | 75  |  |
|       | Rice  |          |                                      |          |     |  |
| Liver | straw | Positive | response of mononuclear leukocytes   | 9.07E-04 | 75  |  |
|       | Rice  |          |                                      |          |     |  |
| Liver | straw | Positive | cell death of tumor cells            | 9.14E-04 | 115 |  |
|       | Rice  |          |                                      |          |     |  |
| Liver | straw | Positive | cellularity                          | 9.15E-04 | 25  |  |
|       | Rice  |          |                                      |          |     |  |
| Liver | straw | Positive | apoptosis of heart cells             | 9.26E-04 | 62  |  |
|       | Rice  |          |                                      |          |     |  |
| Liver | straw | Positive | tyrosine phosphorylation of protein  | 9.26E-04 | 62  |  |
|       | Rice  |          |                                      |          |     |  |
| Liver | straw | Positive | function of muscle                   | 9.43E-04 | 108 |  |
|       | Rice  |          |                                      |          |     |  |
| Liver | straw | Positive | transmigration of blood cells        | 9.78E-04 | 44  |  |
|       | Rice  |          |                                      |          |     |  |
| Liver | straw | Positive | mobilization of Ca <sup>2+</sup>     | 1.02E-03 | 107 |  |
|       | Rice  |          |                                      |          |     |  |
| Liver | straw | Positive | formation of filopodia               | 1.02E-03 | 55  |  |
|       | Rice  |          |                                      |          |     |  |
| Liver | straw | Positive | cell death of cardiomyocytes         | 1.04E-03 | 69  |  |
|       | Rice  |          |                                      |          |     |  |
| Liver | straw | Positive | morphology of skeleton               | 1.05E-03 | 88  |  |
|       | Rice  |          |                                      |          |     |  |
| Liver | straw | Positive | metabolism of acylglycerol           | 1.05E-03 | 47  |  |
|       | Rice  |          |                                      |          |     |  |
| Liver | straw | Positive | hydrolysis of phosphatidylinositol   | 1.09E-03 | 33  |  |
|       | Rice  |          |                                      |          |     |  |
| Liver | straw | Positive | degranulation of cells               | 1.10E-03 | 72  |  |
|       | Rice  |          |                                      |          |     |  |
| Liver | straw | Positive | contraction of heart                 | 1.10E-03 | 59  |  |
|       | Rice  |          |                                      |          |     |  |
| Liver | straw | Positive | formation of connective tissue cells | 1.10E-03 | 68  |  |
| Liver | Rice  | Positive | quantity of lymphoid organ           | 1.11E-03 | 96  |  |

|       |       |          |                                        |          |      |
|-------|-------|----------|----------------------------------------|----------|------|
|       | straw |          |                                        |          |      |
|       | Rice  |          |                                        |          |      |
| Liver | straw | Positive | morphogenesis of neurites              | 1.11E-03 | 128  |
|       | Rice  |          |                                        |          |      |
| Liver | straw | Positive | quantity of cellular protrusions       | 1.11E-03 | 53   |
|       | Rice  |          |                                        |          |      |
| Liver | straw | Positive | synthesis of nitric oxide              | 1.12E-03 | 87   |
|       | Rice  |          |                                        |          |      |
| Liver | straw | Positive | contraction of striated muscle         | 1.12E-03 | 45   |
|       | Rice  |          |                                        |          |      |
| Liver | straw | Positive | cell viability of leukocytes           | 1.13E-03 | 82   |
|       | Rice  |          |                                        |          |      |
| Liver | straw | Positive | cell death of muscle cells             | 1.13E-03 | 104  |
|       | Rice  |          |                                        |          |      |
| Liver | straw | Positive | abnormal morphology of axial skeleton  | 1.14E-03 | 63   |
|       | Rice  |          |                                        |          |      |
| Liver | straw | Positive | trafficking of cells                   | 1.15E-03 | 28   |
|       | Rice  |          |                                        |          |      |
| Liver | straw | Positive | recruitment of cells                   | 1.18E-03 | 110  |
|       | Rice  |          |                                        |          |      |
| Liver | straw | Positive | formation of osteoclasts               | 1.23E-03 | 42   |
|       | Rice  |          |                                        |          |      |
| Liver | straw | Positive | differentiation of leukocytes          | 1.23E-03 | 200  |
|       | Rice  |          |                                        |          |      |
| Liver | straw | Positive | MAPKKK cascade                         | 1.24E-03 | 66   |
|       | Rice  |          |                                        |          |      |
| Liver | straw | Positive | differentiation of blood cells         | 1.24E-03 | 248  |
|       | Rice  |          |                                        |          |      |
| Liver | straw | Positive | adhesion of tumor cell lines           | 1.24E-03 | 90   |
|       | Rice  |          |                                        |          |      |
| Liver | straw | Positive | autosomal dominant disease             | 1.27E-03 | 190  |
|       | Rice  |          |                                        |          |      |
| Liver | straw | Positive | glucose metabolism disorder            | 1.27E-03 | 369  |
|       | Rice  |          |                                        |          |      |
| Liver | straw | Positive | release of granules                    | 1.28E-03 | 15   |
|       | Rice  |          |                                        |          |      |
| Liver | straw | Positive | binding of cells                       | 1.28E-03 | 145  |
|       | Rice  |          |                                        |          |      |
| Liver | straw | Positive | development of connective tissue cells | 1.30E-03 | 71   |
|       | Rice  |          |                                        |          |      |
| Liver | straw | Positive | quantity of macrophages                | 1.30E-03 | 65   |
|       | Rice  |          |                                        |          |      |
| Liver | straw | Negative | proliferation of cells                 | 1.75E-41 | 1567 |
| Liver | Rice  | Negative | malignant solid tumor                  | 7.69E-39 | 3940 |

|       |       |          |                                |          |      |
|-------|-------|----------|--------------------------------|----------|------|
|       | straw |          |                                |          |      |
|       | Rice  |          |                                |          |      |
| Liver | straw | Negative | cancer                         | 7.69E-39 | 3982 |
|       | Rice  |          |                                |          |      |
| Liver | straw | Negative | cell death                     | 3.00E-33 | 1398 |
|       | Rice  |          |                                |          |      |
| Liver | straw | Negative | organismal death               | 5.97E-33 | 1050 |
|       | Rice  |          |                                |          |      |
| Liver | straw | Negative | morphology of cells            | 2.01E-32 | 878  |
|       | Rice  |          |                                |          |      |
| Liver | straw | Negative | morbidity or mortality         | 2.39E-32 | 1059 |
|       | Rice  |          |                                |          |      |
| Liver | straw | Negative | cell movement                  | 4.66E-30 | 937  |
|       | Rice  |          |                                |          |      |
| Liver | straw | Negative | necrosis                       | 4.66E-30 | 1102 |
|       | Rice  |          |                                |          |      |
| Liver | straw | Negative | apoptosis                      | 9.80E-28 | 1117 |
|       | Rice  |          |                                |          |      |
| Liver | straw | Negative | migration of cells             | 1.45E-24 | 828  |
|       | Rice  |          |                                |          |      |
| Liver | straw | Negative | organization of cytoplasm      | 4.35E-24 | 685  |
|       | Rice  |          |                                |          |      |
| Liver | straw | Negative | tumorigenesis of tissue        | 1.39E-23 | 3306 |
|       | Rice  |          |                                |          |      |
| Liver | straw | Negative | neoplasia of epithelial tissue | 4.99E-23 | 3253 |
|       | Rice  |          |                                |          |      |
| Liver | straw | Negative | epithelial cancer              | 1.93E-22 | 3221 |
|       | Rice  |          |                                |          |      |
| Liver | straw | Negative | organization of cytoskeleton   | 2.67E-20 | 616  |
|       | Rice  |          |                                |          |      |
| Liver | straw | Negative | differentiation of cells       | 5.74E-20 | 934  |
|       | Rice  |          |                                |          |      |
| Liver | straw | Negative | transport of molecule          | 2.10E-19 | 694  |
|       | Rice  |          |                                |          |      |
| Liver | straw | Negative | abnormal morphology of cells   | 2.30E-19 | 562  |
|       | Rice  |          |                                |          |      |
| Liver | straw | Negative | abdominal neoplasm             | 3.27E-19 | 3205 |
|       | Rice  |          |                                |          |      |
| Liver | straw | Negative | angiogenesis                   | 3.87E-19 | 421  |
|       | Rice  |          |                                |          |      |
| Liver | straw | Negative | cell viability                 | 4.37E-19 | 574  |
|       | Rice  |          |                                |          |      |
| Liver | straw | Negative | cell survival                  | 8.27E-19 | 608  |
| Liver | Rice  | Negative | expression of RNA              | 1.20E-18 | 888  |

|       |       |          |                                              |          |      |
|-------|-------|----------|----------------------------------------------|----------|------|
|       | straw |          |                                              |          |      |
|       | Rice  |          |                                              |          |      |
| Liver | straw | Negative | abdominal cancer                             | 1.20E-18 | 3166 |
|       | Rice  |          |                                              |          |      |
| Liver | straw | Negative | microtubule dynamics                         | 3.77E-18 | 525  |
|       | Rice  |          |                                              |          |      |
| Liver | straw | Negative | transcription                                | 1.06E-17 | 827  |
|       | Rice  |          |                                              |          |      |
| Liver | straw | Negative | quantity of cells                            | 1.18E-17 | 743  |
|       | Rice  |          |                                              |          |      |
| Liver | straw | Negative | vasculogenesis                               | 1.78E-17 | 346  |
|       | Rice  |          |                                              |          |      |
| Liver | straw | Negative | morphology of cardiovascular system          | 3.32E-17 | 297  |
|       | Rice  |          |                                              |          |      |
| Liver | straw | Negative | cell death of connective tissue cells        | 1.36E-16 | 288  |
|       | Rice  |          |                                              |          |      |
| Liver | straw | Negative | transcription of RNA                         | 2.29E-16 | 769  |
|       | Rice  |          |                                              |          |      |
| Liver | straw | Negative | cellular homeostasis                         | 2.74E-16 | 644  |
|       | Rice  |          |                                              |          |      |
| Liver | straw | Negative | Viral Infection                              | 3.98E-16 | 677  |
|       | Rice  |          |                                              |          |      |
| Liver | straw | Negative | cell death of tumor cell lines               | 8.48E-16 | 643  |
|       | Rice  |          |                                              |          |      |
| Liver | straw | Negative | cell movement of tumor cell lines            | 6.88E-15 | 382  |
|       | Rice  |          |                                              |          |      |
| Liver | straw | Negative | quantity of leukocytes                       | 1.36E-14 | 406  |
|       | Rice  |          |                                              |          |      |
| Liver | straw | Negative | abnormal morphology of cardiovascular system | 2.18E-14 | 266  |
|       | Rice  |          |                                              |          |      |
| Liver | straw | Negative | autosomal recessive disease                  | 2.48E-14 | 407  |
|       | Rice  |          |                                              |          |      |
| Liver | straw | Negative | digestive system cancer                      | 6.29E-14 | 2729 |
|       | Rice  |          |                                              |          |      |
| Liver | straw | Negative | growth of organism                           | 1.02E-13 | 371  |
|       | Rice  |          |                                              |          |      |
| Liver | straw | Negative | quantity of blood cells                      | 1.04E-13 | 445  |
|       | Rice  |          |                                              |          |      |
| Liver | straw | Negative | development of cytoplasm                     | 1.15E-13 | 220  |
|       | Rice  |          |                                              |          |      |
| Liver | straw | Negative | synthesis of lipid                           | 2.87E-13 | 321  |
|       | Rice  |          |                                              |          |      |
| Liver | straw | Negative | migration of tumor cell lines                | 4.90E-13 | 317  |
| Liver | Rice  | Negative | digestive organ tumor                        | 5.15E-13 | 2745 |

|       |       |          |                                        |          |     |
|-------|-------|----------|----------------------------------------|----------|-----|
|       | straw |          |                                        |          |     |
|       | Rice  |          |                                        |          |     |
| Liver | straw | Negative | cell movement of blood cells           | 9.35E-13 | 382 |
|       | Rice  |          |                                        |          |     |
| Liver | straw | Negative | migration of blood cells               | 1.01E-12 | 381 |
|       | Rice  |          |                                        |          |     |
| Liver | straw | Negative | phosphorylation of protein             | 1.01E-12 | 327 |
|       | Rice  |          |                                        |          |     |
| Liver | straw | Negative | formation of cellular protrusions      | 1.19E-12 | 392 |
|       | Rice  |          |                                        |          |     |
| Liver | straw | Negative | leukocyte migration                    | 1.21E-12 | 380 |
|       | Rice  |          |                                        |          |     |
| Liver | straw | Negative | apoptosis of tumor cell lines          | 1.73E-12 | 508 |
|       | Rice  |          |                                        |          |     |
| Liver | straw | Negative | size of body                           | 1.84E-12 | 371 |
|       | Rice  |          |                                        |          |     |
| Liver | straw | Negative | cell cycle progression                 | 2.05E-12 | 446 |
|       | Rice  |          |                                        |          |     |
| Liver | straw | Negative | cell death of fibroblast cell lines    | 2.59E-12 | 201 |
|       | Rice  |          |                                        |          |     |
| Liver | straw | Negative | proliferation of blood cells           | 2.59E-12 | 367 |
|       | Rice  |          |                                        |          |     |
| Liver | straw | Negative | quantity of mononuclear leukocytes     | 8.45E-12 | 323 |
|       | Rice  |          |                                        |          |     |
| Liver | straw | Negative | cell movement of leukocytes            | 9.99E-12 | 335 |
|       | Rice  |          |                                        |          |     |
| Liver | straw | Negative | development of blood cells             | 1.01E-11 | 290 |
|       | Rice  |          |                                        |          |     |
| Liver | straw | Negative | concentration of lipid                 | 1.06E-11 | 352 |
|       | Rice  |          |                                        |          |     |
| Liver | straw | Negative | transcription of DNA                   | 1.83E-11 | 622 |
|       | Rice  |          |                                        |          |     |
| Liver | straw | Negative | quantity of lymphocytes                | 2.38E-11 | 310 |
|       | Rice  |          |                                        |          |     |
| Liver | straw | Negative | Movement Disorders                     | 2.39E-11 | 445 |
|       | Rice  |          |                                        |          |     |
| Liver | straw | Negative | invasion of cells                      | 2.41E-11 | 373 |
|       | Rice  |          |                                        |          |     |
| Liver | straw | Negative | abnormal morphology of thoracic cavity | 2.58E-11 | 262 |
|       | Rice  |          |                                        |          |     |
| Liver | straw | Negative | proliferation of tumor cell lines      | 3.17E-11 | 625 |
|       | Rice  |          |                                        |          |     |
| Liver | straw | Negative | neuronal cell death                    | 6.10E-11 | 298 |
| Liver | Rice  | Negative | engulfment of cells                    | 6.81E-11 | 188 |

|       |       |          |                                           |          |     |
|-------|-------|----------|-------------------------------------------|----------|-----|
|       | straw |          |                                           |          |     |
|       | Rice  |          |                                           |          |     |
| Liver | straw | Negative | infection of cells                        | 6.94E-11 | 343 |
|       | Rice  |          |                                           |          |     |
| Liver | straw | Negative | apoptosis of fibroblast cell lines        | 1.04E-10 | 155 |
|       | Rice  |          |                                           |          |     |
| Liver | straw | Negative | proliferation of immune cells             | 1.04E-10 | 340 |
|       | Rice  |          |                                           |          |     |
| Liver | straw | Negative | protein kinase cascade                    | 1.17E-10 | 193 |
|       | Rice  |          |                                           |          |     |
| Liver | straw | Negative | development of lymphocytes                | 1.23E-10 | 246 |
|       | Rice  |          |                                           |          |     |
| Liver | straw | Negative | development of leukocytes                 | 1.23E-10 | 260 |
|       | Rice  |          |                                           |          |     |
| Liver | straw | Negative | necrosis of epithelial tissue             | 1.23E-10 | 260 |
|       | Rice  |          |                                           |          |     |
| Liver | straw | Negative | formation of cytoskeleton                 | 1.63E-10 | 174 |
|       | Rice  |          |                                           |          |     |
| Liver | straw | Negative | homeostasis of leukocytes                 | 1.69E-10 | 246 |
|       | Rice  |          |                                           |          |     |
| Liver | straw | Negative | Lymphocyte homeostasis                    | 1.73E-10 | 242 |
|       | Rice  |          |                                           |          |     |
| Liver | straw | Negative | neurological signs                        | 1.73E-10 | 284 |
|       | Rice  |          |                                           |          |     |
| Liver | straw | Negative | development of vasculature                | 1.89E-10 | 191 |
|       | Rice  |          |                                           |          |     |
| Liver | straw | Negative | morphology of connective tissue           | 1.91E-10 | 208 |
|       | Rice  |          |                                           |          |     |
| Liver | straw | Negative | development of lymphatic system component | 2.21E-10 | 146 |
|       | Rice  |          |                                           |          |     |
| Liver | straw | Negative | morphology of heart                       | 3.10E-10 | 185 |
|       | Rice  |          |                                           |          |     |
| Liver | straw | Negative | morphology of body cavity                 | 3.16E-10 | 489 |
|       | Rice  |          |                                           |          |     |
| Liver | straw | Negative | transactivation                           | 3.18E-10 | 254 |
|       | Rice  |          |                                           |          |     |
| Liver | straw | Negative | infection by RNA virus                    | 3.38E-10 | 366 |
|       | Rice  |          |                                           |          |     |
| Liver | straw | Negative | formation of cells                        | 3.43E-10 | 410 |
|       | Rice  |          |                                           |          |     |
| Liver | straw | Negative | interphase                                | 4.52E-10 | 284 |
|       | Rice  |          |                                           |          |     |
| Liver | straw | Negative | T cell development                        | 5.51E-10 | 223 |
| Liver | Rice  | Negative | abnormal morphology of body cavity        | 5.58E-10 | 468 |

|       |       |          |                                                 |          |     |
|-------|-------|----------|-------------------------------------------------|----------|-----|
|       | straw |          |                                                 |          |     |
|       | Rice  |          |                                                 |          |     |
| Liver | straw | Negative | invasion of tumor cell lines                    | 5.94E-10 | 287 |
|       | Rice  |          |                                                 |          |     |
| Liver | straw | Negative | development of lymphatic system                 | 5.95E-10 | 164 |
|       | Rice  |          |                                                 |          |     |
| Liver | straw | Negative | dyskinesia                                      | 5.95E-10 | 268 |
|       | Rice  |          |                                                 |          |     |
| Liver | straw | Negative | disorder of basal ganglia                       | 6.97E-10 | 326 |
|       | Rice  |          |                                                 |          |     |
| Liver | straw | Negative | growth of lymphatic system component            | 7.20E-10 | 96  |
|       | Rice  |          |                                                 |          |     |
| Liver | straw | Negative | proliferation of hematopoietic cells            | 7.34E-10 | 122 |
|       | Rice  |          |                                                 |          |     |
| Liver | straw | Negative | organization of organelle                       | 7.38E-10 | 237 |
|       | Rice  |          |                                                 |          |     |
| Liver | straw | Negative | quantity of lymphatic system component          | 8.22E-10 | 172 |
|       | Rice  |          |                                                 |          |     |
| Liver | straw | Negative | infection by Retroviridae                       | 9.10E-10 | 307 |
|       | Rice  |          |                                                 |          |     |
| Liver | straw | Negative | development of body trunk                       | 1.00E-09 | 457 |
|       | Rice  |          |                                                 |          |     |
| Liver | straw | Negative | HIV infection                                   | 1.02E-09 | 304 |
|       | Rice  |          |                                                 |          |     |
| Liver | straw | Negative | homing                                          | 1.02E-09 | 250 |
|       | Rice  |          |                                                 |          |     |
| Liver | straw | Negative | proliferation of mononuclear leukocytes         | 1.02E-09 | 314 |
|       | Rice  |          |                                                 |          |     |
| Liver | straw | Negative | ubiquitination                                  | 1.12E-09 | 155 |
|       | Rice  |          |                                                 |          |     |
| Liver | straw | Negative | proliferation of connective tissue cells        | 1.31E-09 | 257 |
|       | Rice  |          |                                                 |          |     |
| Liver | straw | Negative | cell viability of tumor cell lines              | 1.35E-09 | 329 |
|       | Rice  |          |                                                 |          |     |
| Liver | straw | Negative | proliferation of lymphocytes                    | 1.38E-09 | 309 |
|       | Rice  |          |                                                 |          |     |
| Liver | straw | Negative | homing of cells                                 | 1.38E-09 | 243 |
|       | Rice  |          |                                                 |          |     |
| Liver | straw | Negative | proliferation of hematopoietic progenitor cells | 1.59E-09 | 116 |
|       | Rice  |          |                                                 |          |     |
| Liver | straw | Negative | infection by HIV-1                              | 1.75E-09 | 263 |
|       | Rice  |          |                                                 |          |     |
| Liver | straw | Negative | T cell homeostasis                              | 1.84E-09 | 226 |
| Liver | Rice  | Negative | colony formation                                | 1.94E-09 | 234 |



|       |       |          |                                           |          |     |
|-------|-------|----------|-------------------------------------------|----------|-----|
|       | straw |          |                                           |          |     |
|       | Rice  |          |                                           |          |     |
| Liver | straw | Negative | ubiquitination of protein                 | 2.06E-09 | 152 |
|       | Rice  |          |                                           |          |     |
| Liver | straw | Negative | growth of connective tissue               | 2.14E-09 | 276 |
|       | Rice  |          |                                           |          |     |
| Liver | straw | Negative | fibrogenesis                              | 2.15E-09 | 184 |
|       | Rice  |          |                                           |          |     |
| Liver | straw | Negative | cell death of blood cells                 | 2.15E-09 | 295 |
|       | Rice  |          |                                           |          |     |
| Liver | straw | Negative | function of leukocytes                    | 2.19E-09 | 234 |
|       | Rice  |          |                                           |          |     |
| Liver | straw | Negative | colony formation of cells                 | 2.28E-09 | 216 |
|       | Rice  |          |                                           |          |     |
| Liver | straw | Negative | cell movement of myeloid cells            | 2.30E-09 | 235 |
|       | Rice  |          |                                           |          |     |
| Liver | straw | Negative | differentiation of blood cells            | 2.87E-09 | 352 |
|       | Rice  |          |                                           |          |     |
| Liver | straw | Negative | cell spreading                            | 2.87E-09 | 129 |
|       | Rice  |          |                                           |          |     |
| Liver | straw | Negative | differentiation of leukocytes             | 3.19E-09 | 286 |
|       | Rice  |          |                                           |          |     |
| Liver | straw | Negative | metabolism of carbohydrate                | 3.32E-09 | 266 |
|       | Rice  |          |                                           |          |     |
| Liver | straw | Negative | concentration of fatty acid               | 3.32E-09 | 130 |
|       | Rice  |          |                                           |          |     |
| Liver | straw | Negative | formation of leukocytes                   | 3.66E-09 | 80  |
|       | Rice  |          |                                           |          |     |
| Liver | straw | Negative | proliferation of neuronal cells           | 4.12E-09 | 248 |
|       | Rice  |          |                                           |          |     |
| Liver | straw | Negative | endocytosis                               | 4.72E-09 | 156 |
|       | Rice  |          |                                           |          |     |
| Liver | straw | Negative | chorea                                    | 4.72E-09 | 248 |
|       | Rice  |          |                                           |          |     |
| Liver | straw | Negative | inflammatory response                     | 4.79E-09 | 326 |
|       | Rice  |          |                                           |          |     |
| Liver | straw | Negative | Huntington's Disease                      | 5.12E-09 | 247 |
|       | Rice  |          |                                           |          |     |
| Liver | straw | Negative | cell movement of phagocytes               | 5.25E-09 | 237 |
|       | Rice  |          |                                           |          |     |
| Liver | straw | Negative | cell death of immune cells                | 5.25E-09 | 280 |
|       | Rice  |          |                                           |          |     |
| Liver | straw | Negative | small GTPase mediated signal transduction | 5.77E-09 | 90  |
| Liver | Rice  | Negative | abnormal morphology of heart              | 6.01E-09 | 171 |

|       |       |          |                                          |          |     |
|-------|-------|----------|------------------------------------------|----------|-----|
|       | straw |          |                                          |          |     |
|       | Rice  |          |                                          |          |     |
| Liver | straw | Negative | autosomal dominant disease               | 6.01E-09 | 271 |
|       | Rice  |          |                                          |          |     |
| Liver | straw | Negative | abnormal morphology of epithelial tissue | 6.19E-09 | 185 |
|       | Rice  |          |                                          |          |     |
| Liver | straw | Negative | development of connective tissue         | 6.21E-09 | 166 |
|       | Rice  |          |                                          |          |     |
| Liver | straw | Negative | cell death of epithelial cells           | 6.35E-09 | 216 |
|       | Rice  |          |                                          |          |     |
| Liver | straw | Negative | survival of organism                     | 7.35E-09 | 296 |
|       | Rice  |          |                                          |          |     |
| Liver | straw | Negative | growth of epithelial tissue              | 7.66E-09 | 287 |
|       | Rice  |          |                                          |          |     |
| Liver | straw | Negative | formation of blood cells                 | 1.13E-08 | 95  |
|       | Rice  |          |                                          |          |     |
| Liver | straw | Negative | function of blood cells                  | 1.16E-08 | 250 |
|       | Rice  |          |                                          |          |     |
| Liver | straw | Negative | perinatal death                          | 1.16E-08 | 253 |
|       | Rice  |          |                                          |          |     |
| Liver | straw | Negative | formation of lymphatic system component  | 1.48E-08 | 133 |
|       | Rice  |          |                                          |          |     |
| Liver | straw | Negative | cell movement of neutrophils             | 1.57E-08 | 135 |
|       | Rice  |          |                                          |          |     |
| Liver | straw | Negative | quantity of lymphoid organ               | 1.72E-08 | 139 |
|       | Rice  |          |                                          |          |     |
| Liver | straw | Negative | formation of filaments                   | 1.72E-08 | 175 |
|       | Rice  |          |                                          |          |     |
| Liver | straw | Negative | chemotaxis                               | 1.72E-08 | 233 |
|       | Rice  |          |                                          |          |     |
| Liver | straw | Negative | transactivation of RNA                   | 2.19E-08 | 232 |
|       | Rice  |          |                                          |          |     |
| Liver | straw | Negative | synthesis of carbohydrate                | 2.81E-08 | 185 |
|       | Rice  |          |                                          |          |     |
| Liver | straw | Negative | morphology of vessel                     | 2.81E-08 | 138 |
|       | Rice  |          |                                          |          |     |
| Liver | straw | Negative | degeneration of nervous system           | 2.81E-08 | 130 |
|       | Rice  |          |                                          |          |     |
| Liver | straw | Negative | formation of lymphoid organ              | 2.83E-08 | 121 |
|       | Rice  |          |                                          |          |     |
| Liver | straw | Negative | formation of actin filaments             | 3.01E-08 | 137 |
|       | Rice  |          |                                          |          |     |
| Liver | straw | Negative | neuromuscular disease                    | 3.01E-08 | 361 |
| Liver | Rice  | Negative | chemotaxis of cells                      | 3.02E-08 | 225 |

|       |       |          |                                           |          |      |
|-------|-------|----------|-------------------------------------------|----------|------|
|       | straw |          |                                           |          |      |
|       | Rice  |          |                                           |          |      |
| Liver | straw | Negative | cell movement of granulocytes             | 3.36E-08 | 163  |
|       | Rice  |          |                                           |          |      |
| Liver | straw | Negative | quantity of connective tissue             | 3.48E-08 | 254  |
|       | Rice  |          |                                           |          |      |
| Liver | straw | Negative | fatty acid metabolism                     | 3.80E-08 | 253  |
|       | Rice  |          |                                           |          |      |
| Liver | straw | Negative | metabolism of protein                     | 3.91E-08 | 394  |
|       | Rice  |          |                                           |          |      |
| Liver | straw | Negative | Neurodegeneration                         | 5.01E-08 | 138  |
|       | Rice  |          |                                           |          |      |
| Liver | straw | Negative | cell death of epithelial cell lines       | 6.55E-08 | 127  |
|       | Rice  |          |                                           |          |      |
| Liver | straw | Negative | breast or colorectal cancer               | 7.35E-08 | 1815 |
|       | Rice  |          |                                           |          |      |
| Liver | straw | Negative | activation of DNA endogenous promoter     | 8.30E-08 | 479  |
|       | Rice  |          |                                           |          |      |
| Liver | straw | Negative | formation of muscle                       | 8.66E-08 | 172  |
|       | Rice  |          |                                           |          |      |
| Liver | straw | Negative | abnormal morphology of abdomen            | 8.70E-08 | 356  |
|       | Rice  |          |                                           |          |      |
| Liver | straw | Negative | formation of lymphocytes                  | 9.28E-08 | 63   |
|       | Rice  |          |                                           |          |      |
| Liver | straw | Negative | differentiation of mononuclear leukocytes | 9.37E-08 | 228  |
|       | Rice  |          |                                           |          |      |
| Liver | straw | Negative | formation of mononuclear leukocytes       | 9.47E-08 | 65   |
|       | Rice  |          |                                           |          |      |
| Liver | straw | Negative | growth of embryo                          | 1.05E-07 | 203  |
|       | Rice  |          |                                           |          |      |
| Liver | straw | Negative | Growth Failure                            | 1.08E-07 | 250  |
|       | Rice  |          |                                           |          |      |
| Liver | straw | Negative | abnormal morphology of digestive system   | 1.11E-07 | 229  |
|       | Rice  |          |                                           |          |      |
| Liver | straw | Negative | activation of cells                       | 1.13E-07 | 393  |
|       | Rice  |          |                                           |          |      |
| Liver | straw | Negative | morphology of digestive system            | 1.32E-07 | 239  |
|       | Rice  |          |                                           |          |      |
| Liver | straw | Negative | formation of thymocytes                   | 1.38E-07 | 54   |
|       | Rice  |          |                                           |          |      |
| Liver | straw | Negative | cell transformation                       | 1.44E-07 | 196  |
|       | Rice  |          |                                           |          |      |
| Liver | straw | Negative | activation of blood cells                 | 1.45E-07 | 306  |
| Liver | Rice  | Negative | quantity of hematopoietic cells           | 1.45E-07 | 189  |

|       |       |          |                                            |          |     |
|-------|-------|----------|--------------------------------------------|----------|-----|
|       | straw |          |                                            |          |     |
|       | Rice  |          |                                            |          |     |
| Liver | straw | Negative | quantity of hematopoietic progenitor cells | 1.87E-07 | 188 |
|       | Rice  |          |                                            |          |     |
| Liver | straw | Negative | apoptosis of blood cells                   | 1.90E-07 | 209 |
|       | Rice  |          |                                            |          |     |
| Liver | straw | Negative | benign neoplasia                           | 2.01E-07 | 372 |
|       | Rice  |          |                                            |          |     |
| Liver | straw | Negative | synthesis of fatty acid                    | 2.03E-07 | 137 |
|       | Rice  |          |                                            |          |     |
| Liver | straw | Negative | quantity of T lymphocytes                  | 2.24E-07 | 224 |
|       | Rice  |          |                                            |          |     |
| Liver | straw | Negative | growth of lymphoid organ                   | 2.32E-07 | 81  |
|       | Rice  |          |                                            |          |     |
| Liver | straw | Negative | formation of T lymphocytes                 | 2.36E-07 | 58  |
|       | Rice  |          |                                            |          |     |
| Liver | straw | Negative | quantity of B lymphocytes                  | 2.37E-07 | 150 |
|       | Rice  |          |                                            |          |     |
| Liver | straw | Negative | cell death of cervical cancer cell lines   | 2.37E-07 | 152 |
|       | Rice  |          |                                            |          |     |
| Liver | straw | Negative | morphology of blood vessel                 | 2.45E-07 | 125 |
|       | Rice  |          |                                            |          |     |
| Liver | straw | Negative | quantity of carbohydrate                   | 2.75E-07 | 217 |
|       | Rice  |          |                                            |          |     |
| Liver | straw | Negative | proliferation of T lymphocytes             | 2.85E-07 | 250 |
|       | Rice  |          |                                            |          |     |
| Liver | straw | Negative | cell death of kidney cells                 | 3.06E-07 | 151 |
|       | Rice  |          |                                            |          |     |
| Liver | straw | Negative | cellular infiltration by leukocytes        | 3.12E-07 | 166 |
|       | Rice  |          |                                            |          |     |
| Liver | straw | Negative | abnormal morphology of head                | 3.30E-07 | 336 |
|       | Rice  |          |                                            |          |     |
| Liver | straw | Negative | morphology of head                         | 3.52E-07 | 352 |
|       | Rice  |          |                                            |          |     |
| Liver | straw | Negative | proliferation of lymphatic system cells    | 3.62E-07 | 92  |
|       | Rice  |          |                                            |          |     |
| Liver | straw | Negative | growth of muscle tissue                    | 3.78E-07 | 160 |
|       | Rice  |          |                                            |          |     |
| Liver | straw | Negative | apoptosis of epithelial cell lines         | 4.10E-07 | 101 |
|       | Rice  |          |                                            |          |     |
| Liver | straw | Negative | proliferation of muscle cells              | 4.11E-07 | 159 |
|       | Rice  |          |                                            |          |     |
| Liver | straw | Negative | cellular infiltration of cells             | 4.47E-07 | 169 |
| Liver | Rice  | Negative | differentiation of lymphocytes             | 4.56E-07 | 208 |

|       |       |          |                                      |          |     |
|-------|-------|----------|--------------------------------------|----------|-----|
|       | straw |          |                                      |          |     |
|       | Rice  |          |                                      |          |     |
| Liver | straw | Negative | cell movement of endothelial cells   | 4.56E-07 | 152 |
|       | Rice  |          |                                      |          |     |
| Liver | straw | Negative | cell death of sarcoma cell lines     | 4.73E-07 | 102 |
|       | Rice  |          |                                      |          |     |
| Liver | straw | Negative | formation of actin stress fibers     | 5.12E-07 | 107 |
|       | Rice  |          |                                      |          |     |
| Liver | straw | Negative | apoptosis of connective tissue cells | 5.48E-07 | 129 |
|       | Rice  |          |                                      |          |     |
| Liver | straw | Negative | mitosis                              | 5.67E-07 | 207 |
|       | Rice  |          |                                      |          |     |
| Liver | straw | Negative | cell death of heart cells            | 5.79E-07 | 99  |
|       | Rice  |          |                                      |          |     |
| Liver | straw | Negative | cell death of heart                  | 5.85E-07 | 102 |
|       | Rice  |          |                                      |          |     |
| Liver | straw | Negative | activation of leukocytes             | 6.63E-07 | 284 |
|       | Rice  |          |                                      |          |     |
| Liver | straw | Negative | cell death of T lymphocytes          | 7.57E-07 | 136 |
|       | Rice  |          |                                      |          |     |
| Liver | straw | Negative | cell death of mononuclear leukocytes | 7.61E-07 | 168 |
|       | Rice  |          |                                      |          |     |
| Liver | straw | Negative | development of hematopoietic system  | 7.61E-07 | 110 |
|       | Rice  |          |                                      |          |     |
| Liver | straw | Negative | arthropathy                          | 8.55E-07 | 378 |
|       | Rice  |          |                                      |          |     |
| Liver | straw | Negative | development of cardiovascular tissue | 9.20E-07 | 157 |
|       | Rice  |          |                                      |          |     |
| Liver | straw | Negative | cell death of muscle                 | 9.74E-07 | 147 |
|       | Rice  |          |                                      |          |     |
| Liver | straw | Negative | generation of leukocytes             | 1.13E-06 | 75  |
|       | Rice  |          |                                      |          |     |
| Liver | straw | Negative | binding of DNA                       | 1.19E-06 | 215 |
|       | Rice  |          |                                      |          |     |
| Liver | straw | Negative | cellular infiltration                | 1.19E-06 | 183 |
|       | Rice  |          |                                      |          |     |
| Liver | straw | Negative | proliferation of fibroblasts         | 1.23E-06 | 150 |
|       | Rice  |          |                                      |          |     |
| Liver | straw | Negative | necrosis of muscle                   | 1.25E-06 | 146 |
|       | Rice  |          |                                      |          |     |
| Liver | straw | Negative | morphology of heart ventricle        | 1.25E-06 | 87  |
|       | Rice  |          |                                      |          |     |
| Liver | straw | Negative | necrosis of cardiac muscle           | 1.28E-06 | 97  |
| Liver | Rice  | Negative | synthesis of reactive oxygen species | 1.29E-06 | 199 |

|       |       |          |                                      |          |     |
|-------|-------|----------|--------------------------------------|----------|-----|
|       | straw |          |                                      |          |     |
|       | Rice  |          |                                      |          |     |
| Liver | straw | Negative | replication of RNA virus             | 1.34E-06 | 209 |
|       | Rice  |          |                                      |          |     |
| Liver | straw | Negative | apoptosis of kidney cell lines       | 1.34E-06 | 105 |
|       | Rice  |          |                                      |          |     |
| Liver | straw | Negative | cell death of muscle cells           | 1.34E-06 | 143 |
|       | Rice  |          |                                      |          |     |
| Liver | straw | Negative | generation of blood cells            | 1.36E-06 | 76  |
|       | Rice  |          |                                      |          |     |
| Liver | straw | Negative | cognition                            | 1.36E-06 | 189 |
|       | Rice  |          |                                      |          |     |
| Liver | straw | Negative | replication of virus                 | 1.36E-06 | 230 |
|       | Rice  |          |                                      |          |     |
| Liver | straw | Negative | growth of neurites                   | 1.36E-06 | 192 |
|       | Rice  |          |                                      |          |     |
| Liver | straw | Negative | endothelial cell development         | 1.38E-06 | 150 |
|       | Rice  |          |                                      |          |     |
| Liver | straw | Negative | growth of lesion                     | 1.40E-06 | 319 |
|       | Rice  |          |                                      |          |     |
| Liver | straw | Negative | apoptosis of leukocytes              | 1.40E-06 | 190 |
|       | Rice  |          |                                      |          |     |
| Liver | straw | Negative | cell movement of fibroblasts         | 1.53E-06 | 83  |
|       | Rice  |          |                                      |          |     |
| Liver | straw | Negative | hypersensitive reaction              | 1.61E-06 | 179 |
|       | Rice  |          |                                      |          |     |
| Liver | straw | Negative | migration of connective tissue cells | 1.62E-06 | 82  |
|       | Rice  |          |                                      |          |     |
| Liver | straw | Negative | cell viability of blood cells        | 1.63E-06 | 124 |
|       | Rice  |          |                                      |          |     |
| Liver | straw | Negative | quantity of phagocytes               | 1.65E-06 | 177 |
|       | Rice  |          |                                      |          |     |
| Liver | straw | Negative | cell death of lymphocytes            | 1.65E-06 | 162 |
|       | Rice  |          |                                      |          |     |
| Liver | straw | Negative | growth of tumor                      | 1.66E-06 | 318 |
|       | Rice  |          |                                      |          |     |
| Liver | straw | Negative | arthritis                            | 1.66E-06 | 370 |
|       | Rice  |          |                                      |          |     |
| Liver | straw | Negative | size of animal                       | 1.68E-06 | 81  |
|       | Rice  |          |                                      |          |     |
| Liver | straw | Negative | cell death of cardiomyocytes         | 1.73E-06 | 95  |
|       | Rice  |          |                                      |          |     |
| Liver | straw | Negative | differentiation of connective tissue | 1.75E-06 | 293 |
| Liver | Rice  | Negative | accumulation of lipid                | 1.95E-06 | 128 |

|       |       |          |                                               |          |     |
|-------|-------|----------|-----------------------------------------------|----------|-----|
|       | straw |          |                                               |          |     |
|       | Rice  |          |                                               |          |     |
| Liver | straw | Negative | growth of thymus gland                        | 2.04E-06 | 48  |
|       | Rice  |          |                                               |          |     |
| Liver | straw | Negative | development of endothelial tissue             | 2.07E-06 | 154 |
|       | Rice  |          |                                               |          |     |
| Liver | straw | Negative | apoptosis of heart cells                      | 2.13E-06 | 85  |
|       | Rice  |          |                                               |          |     |
| Liver | straw | Negative | Organ Degeneration                            | 2.13E-06 | 203 |
|       | Rice  |          |                                               |          |     |
| Liver | straw | Negative | secretory pathway                             | 2.21E-06 | 88  |
|       | Rice  |          |                                               |          |     |
| Liver | straw | Negative | S phase                                       | 2.22E-06 | 113 |
|       | Rice  |          |                                               |          |     |
| Liver | straw | Negative | secretion of molecule                         | 2.25E-06 | 225 |
|       | Rice  |          |                                               |          |     |
| Liver | straw | Negative | phosphorylation of L-amino acid               | 2.26E-06 | 97  |
|       | Rice  |          |                                               |          |     |
| Liver | straw | Negative | quantity of thymus gland                      | 2.37E-06 | 102 |
|       | Rice  |          |                                               |          |     |
| Liver | straw | Negative | morphology of cardiovascular tissue           | 2.38E-06 | 44  |
|       | Rice  |          |                                               |          |     |
| Liver | straw | Negative | apoptosis of cervical cancer cell lines       | 2.39E-06 | 121 |
|       | Rice  |          |                                               |          |     |
| Liver | straw | Negative | migration of endothelial cells                | 2.44E-06 | 139 |
|       | Rice  |          |                                               |          |     |
| Liver | straw | Negative | development of hematopoietic progenitor cells | 2.46E-06 | 86  |
|       | Rice  |          |                                               |          |     |
| Liver | straw | Negative | quantity of thymocytes                        | 2.52E-06 | 101 |
|       | Rice  |          |                                               |          |     |
| Liver | straw | Negative | degeneration of cells                         | 2.76E-06 | 145 |
|       | Rice  |          |                                               |          |     |
| Liver | straw | Negative | accumulation of cells                         | 2.90E-06 | 148 |
|       | Rice  |          |                                               |          |     |
| Liver | straw | Negative | differentiation of connective tissue cells    | 2.90E-06 | 259 |
|       | Rice  |          |                                               |          |     |
| Liver | straw | Negative | targeting of protein                          | 2.90E-06 | 61  |
|       | Rice  |          |                                               |          |     |
| Liver | straw | Negative | cell death of kidney cell lines               | 2.90E-06 | 129 |
|       | Rice  |          |                                               |          |     |
| Liver | straw | Negative | morphology of endothelial tissue              | 3.05E-06 | 42  |
|       | Rice  |          |                                               |          |     |
| Liver | straw | Negative | cell movement of cancer cells                 | 3.06E-06 | 68  |
| Liver | Rice  | Negative | apoptosis of epithelial cells                 | 3.08E-06 | 122 |

|       |       |          |                                              |          |     |
|-------|-------|----------|----------------------------------------------|----------|-----|
|       | straw |          |                                              |          |     |
|       | Rice  |          |                                              |          |     |
| Liver | straw | Negative | proliferation of endothelial cells           | 3.12E-06 | 132 |
|       | Rice  |          |                                              |          |     |
| Liver | straw | Negative | learning                                     | 3.36E-06 | 173 |
|       | Rice  |          |                                              |          |     |
| Liver | straw | Negative | abnormal morphology of blood vessel          | 3.47E-06 | 114 |
|       | Rice  |          |                                              |          |     |
| Liver | straw | Negative | development of head                          | 3.58E-06 | 384 |
|       | Rice  |          |                                              |          |     |
| Liver | straw | Negative | transport of carbohydrate                    | 3.83E-06 | 86  |
|       | Rice  |          |                                              |          |     |
| Liver | straw | Negative | aggregation of cells                         | 3.93E-06 | 137 |
|       | Rice  |          |                                              |          |     |
| Liver | straw | Negative | formation of skin                            | 3.95E-06 | 153 |
|       | Rice  |          |                                              |          |     |
| Liver | straw | Negative | aggregation of blood platelets               | 4.07E-06 | 85  |
|       | Rice  |          |                                              |          |     |
| Liver | straw | Negative | cell movement of connective tissue cells     | 4.09E-06 | 97  |
|       | Rice  |          |                                              |          |     |
| Liver | straw | Negative | congenital anomaly of musculoskeletal system | 4.10E-06 | 293 |
|       | Rice  |          |                                              |          |     |
| Liver | straw | Negative | branching of cells                           | 4.16E-06 | 154 |
|       | Rice  |          |                                              |          |     |
| Liver | straw | Negative | modification of peptide                      | 4.22E-06 | 51  |
|       | Rice  |          |                                              |          |     |
| Liver | straw | Negative | cell death of embryonic cells                | 4.22E-06 | 55  |
|       | Rice  |          |                                              |          |     |
| Liver | straw | Negative | necrosis of kidney                           | 4.23E-06 | 152 |
|       | Rice  |          |                                              |          |     |
| Liver | straw | Negative | cell viability of lymphocytes                | 4.26E-06 | 84  |
|       | Rice  |          |                                              |          |     |
| Liver | straw | Negative | generation of lymphocytes                    | 4.40E-06 | 65  |
|       | Rice  |          |                                              |          |     |
| Liver | straw | Negative | peripheral vascular disease                  | 4.49E-06 | 158 |
|       | Rice  |          |                                              |          |     |
| Liver | straw | Negative | development of epithelial tissue             | 4.80E-06 | 210 |
|       | Rice  |          |                                              |          |     |
| Liver | straw | Negative | outgrowth of neurites                        | 4.80E-06 | 167 |
|       | Rice  |          |                                              |          |     |
| Liver | straw | Negative | apoptosis of cardiomyocytes                  | 4.82E-06 | 82  |
|       | Rice  |          |                                              |          |     |
| Liver | straw | Negative | sprouting                                    | 5.01E-06 | 160 |
| Liver | Rice  | Negative | morphology of nervous system                 | 5.19E-06 | 310 |



|       |       |          |                                             |          |      |  |
|-------|-------|----------|---------------------------------------------|----------|------|--|
|       | straw |          |                                             |          |      |  |
|       | Rice  |          |                                             |          |      |  |
| Liver | straw | Negative | colon cancer                                | 5.25E-06 | 1349 |  |
|       | Rice  |          |                                             |          |      |  |
| Liver | straw | Negative | cell viability of mononuclear leukocytes    | 5.37E-06 | 87   |  |
|       | Rice  |          |                                             |          |      |  |
| Liver | straw | Negative | proliferation of smooth muscle cells        | 5.44E-06 | 121  |  |
|       | Rice  |          |                                             |          |      |  |
| Liver | straw | Negative | generation of mononuclear leukocytes        | 5.48E-06 | 66   |  |
|       | Rice  |          |                                             |          |      |  |
| Liver | straw | Negative | invasion of tissue                          | 5.73E-06 | 86   |  |
|       | Rice  |          |                                             |          |      |  |
| Liver | straw | Negative | gastrointestinal tract cancer               | 5.77E-06 | 1822 |  |
|       | Rice  |          |                                             |          |      |  |
| Liver | straw | Negative | development of body axis                    | 5.98E-06 | 408  |  |
|       | Rice  |          |                                             |          |      |  |
| Liver | straw | Negative | neoplasia of colon                          | 6.01E-06 | 1352 |  |
|       | Rice  |          |                                             |          |      |  |
| Liver | straw | Negative | colon tumor                                 | 6.01E-06 | 1356 |  |
|       | Rice  |          |                                             |          |      |  |
| Liver | straw | Negative | abdominal adenocarcinoma                    | 6.05E-06 | 2116 |  |
|       | Rice  |          |                                             |          |      |  |
| Liver | straw | Negative | behavior                                    | 6.14E-06 | 385  |  |
|       | Rice  |          |                                             |          |      |  |
| Liver | straw | Negative | infection of embryonic cell lines           | 6.26E-06 | 117  |  |
|       | Rice  |          |                                             |          |      |  |
| Liver | straw | Negative | infection of epithelial cell lines          | 6.26E-06 | 117  |  |
|       | Rice  |          |                                             |          |      |  |
| Liver | straw | Negative | morphology of muscle                        | 6.26E-06 | 140  |  |
|       | Rice  |          |                                             |          |      |  |
| Liver | straw | Negative | concentration of phospholipid               | 6.26E-06 | 81   |  |
|       | Rice  |          |                                             |          |      |  |
| Liver | straw | Negative | formation of thymus gland                   | 6.32E-06 | 73   |  |
|       | Rice  |          |                                             |          |      |  |
| Liver | straw | Negative | recruitment of cells                        | 6.65E-06 | 148  |  |
|       | Rice  |          |                                             |          |      |  |
| Liver | straw | Negative | angiogenesis of lesion                      | 6.86E-06 | 59   |  |
|       | Rice  |          |                                             |          |      |  |
| Liver | straw | Negative | formation of hematopoietic progenitor cells | 6.86E-06 | 59   |  |
|       | Rice  |          |                                             |          |      |  |
| Liver | straw | Negative | migration of tumor cells                    | 7.02E-06 | 97   |  |
|       | Rice  |          |                                             |          |      |  |
| Liver | straw | Negative | differentiation of epithelial tissue        | 7.02E-06 | 149  |  |
| Liver | Rice  | Negative | tumorigenesis of intestine                  | 7.13E-06 | 1354 |  |

|       |       |          |                                         |          |      |
|-------|-------|----------|-----------------------------------------|----------|------|
|       | straw |          |                                         |          |      |
|       | Rice  |          |                                         |          |      |
| Liver | straw | Negative | adenocarcinoma                          | 7.54E-06 | 2320 |
|       | Rice  |          |                                         |          |      |
| Liver | straw | Negative | damage of epithelial tissue             | 7.80E-06 | 50   |
|       | Rice  |          |                                         |          |      |
| Liver | straw | Negative | mass of organism                        | 7.86E-06 | 139  |
|       | Rice  |          |                                         |          |      |
| Liver | straw | Negative | chemotaxis of phagocytes                | 7.95E-06 | 124  |
|       | Rice  |          |                                         |          |      |
| Liver | straw | Negative | I-kappaB kinase/NF-kappaB cascade       | 7.95E-06 | 77   |
|       | Rice  |          |                                         |          |      |
| Liver | straw | Negative | catabolism of protein                   | 8.73E-06 | 241  |
|       | Rice  |          |                                         |          |      |
| Liver | straw | Negative | metabolism of reactive oxygen species   | 9.10E-06 | 202  |
|       | Rice  |          |                                         |          |      |
| Liver | straw | Negative | cell viability of leukocytes            | 9.19E-06 | 110  |
|       | Rice  |          |                                         |          |      |
| Liver | straw | Negative | recruitment of phagocytes               | 9.63E-06 | 105  |
|       | Rice  |          |                                         |          |      |
| Liver | straw | Negative | cell viability of T lymphocytes         | 1.04E-05 | 54   |
|       | Rice  |          |                                         |          |      |
| Liver | straw | Negative | function of lymphocytes                 | 1.04E-05 | 141  |
|       | Rice  |          |                                         |          |      |
| Liver | straw | Negative | proliferation of epithelial cells       | 1.04E-05 | 199  |
|       | Rice  |          |                                         |          |      |
| Liver | straw | Negative | Bleeding                                | 1.04E-05 | 173  |
|       | Rice  |          |                                         |          |      |
| Liver | straw | Negative | exocytosis                              | 1.04E-05 | 83   |
|       | Rice  |          |                                         |          |      |
| Liver | straw | Negative | metabolism of membrane lipid derivative | 1.04E-05 | 159  |
|       | Rice  |          |                                         |          |      |
| Liver | straw | Negative | invasion of carcinoma cell lines        | 1.04E-05 | 86   |
|       | Rice  |          |                                         |          |      |
| Liver | straw | Negative | female genital tract serous cancer      | 1.14E-05 | 158  |
|       | Rice  |          |                                         |          |      |
| Liver | straw | Negative | infection of kidney cell lines          | 1.21E-05 | 119  |
|       | Rice  |          |                                         |          |      |
| Liver | straw | Negative | apoptosis of neurons                    | 1.23E-05 | 177  |
|       | Rice  |          |                                         |          |      |
| Liver | straw | Negative | cell death of melanoma cell lines       | 1.27E-05 | 106  |
|       | Rice  |          |                                         |          |      |
| Liver | straw | Negative | migration of muscle cells               | 1.28E-05 | 73   |
| Liver | Rice  | Negative | quantity of antigen presenting cells    | 1.31E-05 | 116  |

|       |       |          |                                          |          |      |
|-------|-------|----------|------------------------------------------|----------|------|
|       | straw |          |                                          |          |      |
|       | Rice  |          |                                          |          |      |
| Liver | straw | Negative | outgrowth of cells                       | 1.33E-05 | 176  |
|       | Rice  |          |                                          |          |      |
| Liver | straw | Negative | cell movement of muscle cells            | 1.37E-05 | 79   |
|       | Rice  |          |                                          |          |      |
| Liver | straw | Negative | differentiation of T lymphocytes         | 1.48E-05 | 155  |
|       | Rice  |          |                                          |          |      |
| Liver | straw | Negative | transmembrane potential of mitochondria  | 1.50E-05 | 92   |
|       | Rice  |          |                                          |          |      |
| Liver | straw | Negative | cell movement of lymphocytes             | 1.50E-05 | 161  |
|       | Rice  |          |                                          |          |      |
| Liver | straw | Negative | differentiation of bone                  | 1.52E-05 | 167  |
|       | Rice  |          |                                          |          |      |
| Liver | straw | Negative | apoptosis of muscle                      | 1.53E-05 | 110  |
|       | Rice  |          |                                          |          |      |
| Liver | straw | Negative | apoptosis of endothelial cells           | 1.58E-05 | 80   |
|       | Rice  |          |                                          |          |      |
| Liver | straw | Negative | internalization of cells                 | 1.60E-05 | 73   |
|       | Rice  |          |                                          |          |      |
| Liver | straw | Negative | concentration of Ca <sup>2+</sup>        | 1.62E-05 | 58   |
|       | Rice  |          |                                          |          |      |
| Liver | straw | Negative | neuritogenesis                           | 1.62E-05 | 232  |
|       | Rice  |          |                                          |          |      |
| Liver | straw | Negative | migration of fibroblasts                 | 1.62E-05 | 64   |
|       | Rice  |          |                                          |          |      |
| Liver | straw | Negative | uptake of carbohydrate                   | 1.63E-05 | 121  |
|       | Rice  |          |                                          |          |      |
| Liver | straw | Negative | morphology of lymphatic system component | 1.63E-05 | 169  |
|       | Rice  |          |                                          |          |      |
| Liver | straw | Negative | immune response of cells                 | 1.63E-05 | 228  |
|       | Rice  |          |                                          |          |      |
| Liver | straw | Negative | Gastrointestinal Tract Cancer and Tumors | 1.63E-05 | 1844 |
|       | Rice  |          |                                          |          |      |
| Liver | straw | Negative | growth of embryonic tissue               | 1.64E-05 | 115  |
|       | Rice  |          |                                          |          |      |
| Liver | straw | Negative | development of neurons                   | 1.64E-05 | 306  |
|       | Rice  |          |                                          |          |      |
| Liver | straw | Negative | neoplasia of tumor cell lines            | 1.75E-05 | 131  |
|       | Rice  |          |                                          |          |      |
| Liver | straw | Negative | angiogenesis of tumor                    | 1.75E-05 | 55   |
|       | Rice  |          |                                          |          |      |
| Liver | straw | Negative | function of cardiovascular system        | 1.76E-05 | 151  |
| Liver | Rice  | Negative | cell movement of smooth muscle cells     | 1.77E-05 | 71   |

|       |       |          |                                          |          |      |
|-------|-------|----------|------------------------------------------|----------|------|
|       | straw |          |                                          |          |      |
|       | Rice  |          |                                          |          |      |
| Liver | straw | Negative | morphogenesis of neurons                 | 1.82E-05 | 172  |
|       | Rice  |          |                                          |          |      |
| Liver | straw | Negative | transport of monosaccharide              | 1.87E-05 | 70   |
|       | Rice  |          |                                          |          |      |
| Liver | straw | Negative | cell movement of mononuclear leukocytes  | 1.87E-05 | 186  |
|       | Rice  |          |                                          |          |      |
| Liver | straw | Negative | activation of enzyme                     | 1.88E-05 | 158  |
|       | Rice  |          |                                          |          |      |
| Liver | straw | Negative | gastrointestinal carcinoma               | 1.89E-05 | 1631 |
|       | Rice  |          |                                          |          |      |
| Liver | straw | Negative | cell movement of tumor cells             | 1.89E-05 | 80   |
|       | Rice  |          |                                          |          |      |
| Liver | straw | Negative | apoptosis of muscle cells                | 1.90E-05 | 109  |
|       | Rice  |          |                                          |          |      |
| Liver | straw | Negative | proliferation of thymocytes              | 1.90E-05 | 43   |
|       | Rice  |          |                                          |          |      |
| Liver | straw | Negative | seizures                                 | 1.96E-05 | 162  |
|       | Rice  |          |                                          |          |      |
| Liver | straw | Negative | differentiation of bone cells            | 1.96E-05 | 165  |
|       | Rice  |          |                                          |          |      |
| Liver | straw | Negative | adenoma                                  | 2.00E-05 | 220  |
|       | Rice  |          |                                          |          |      |
| Liver | straw | Negative | metastasis                               | 2.07E-05 | 297  |
|       | Rice  |          |                                          |          |      |
| Liver | straw | Negative | killing of macrophages                   | 2.27E-05 | 13   |
|       | Rice  |          |                                          |          |      |
| Liver | straw | Negative | Dermatitis                               | 2.28E-05 | 175  |
|       | Rice  |          |                                          |          |      |
| Liver | straw | Negative | breast or ovarian cancer                 | 2.28E-05 | 711  |
|       | Rice  |          |                                          |          |      |
| Liver | straw | Negative | infection of tumor cell lines            | 2.28E-05 | 204  |
|       | Rice  |          |                                          |          |      |
| Liver | straw | Negative | homing of blood cells                    | 2.28E-05 | 154  |
|       | Rice  |          |                                          |          |      |
| Liver | straw | Negative | glucose metabolism disorder              | 2.28E-05 | 487  |
|       | Rice  |          |                                          |          |      |
| Liver | straw | Negative | cell death of neuroblastoma cell lines   | 2.28E-05 | 83   |
|       | Rice  |          |                                          |          |      |
| Liver | straw | Negative | formation of plasma membrane projections | 2.30E-05 | 236  |
|       | Rice  |          |                                          |          |      |
| Liver | straw | Negative | accumulation of blood cells              | 2.39E-05 | 116  |
| Liver | Rice  | Negative | epileptic seizure                        | 2.40E-05 | 73   |

|       |       |          |                                           |          |     |
|-------|-------|----------|-------------------------------------------|----------|-----|
|       | straw |          |                                           |          |     |
|       | Rice  |          |                                           |          |     |
| Liver | straw | Negative | peripheral arterial disease               | 2.43E-05 | 90  |
|       | Rice  |          |                                           |          |     |
| Liver | straw | Negative | concentration of acylglycerol             | 2.44E-05 | 137 |
|       | Rice  |          |                                           |          |     |
| Liver | straw | Negative | cell death of astrocytes                  | 2.45E-05 | 23  |
|       | Rice  |          |                                           |          |     |
| Liver | straw | Negative | adhesion of blood cells                   | 2.45E-05 | 153 |
|       | Rice  |          |                                           |          |     |
| Liver | straw | Negative | morphology of respiratory system          | 2.53E-05 | 128 |
|       | Rice  |          |                                           |          |     |
| Liver | straw | Negative | morphology of skin                        | 2.59E-05 | 113 |
|       | Rice  |          |                                           |          |     |
| Liver | straw | Negative | recruitment of macrophages                | 2.59E-05 | 49  |
|       | Rice  |          |                                           |          |     |
| Liver | straw | Negative | maturation of cells                       | 2.62E-05 | 183 |
|       | Rice  |          |                                           |          |     |
| Liver | straw | Negative | cell death of endothelial cells           | 2.69E-05 | 86  |
|       | Rice  |          |                                           |          |     |
| Liver | straw | Negative | migration of cancer cells                 | 2.76E-05 | 83  |
|       | Rice  |          |                                           |          |     |
| Liver | straw | Negative | proliferation of embryonic cells          | 2.79E-05 | 104 |
|       | Rice  |          |                                           |          |     |
| Liver | straw | Negative | mammary tumor                             | 2.94E-05 | 613 |
|       | Rice  |          |                                           |          |     |
| Liver | straw | Negative | abnormal morphology of nervous system     | 2.94E-05 | 283 |
|       | Rice  |          |                                           |          |     |
| Liver | straw | Negative | vascularization                           | 2.95E-05 | 99  |
|       | Rice  |          |                                           |          |     |
| Liver | straw | Negative | abnormal morphology of respiratory system | 2.97E-05 | 126 |
|       | Rice  |          |                                           |          |     |
| Liver | straw | Negative | cell death of bone cancer cell lines      | 2.99E-05 | 76  |
|       | Rice  |          |                                           |          |     |
| Liver | straw | Negative | quantity of immunoglobulin                | 3.08E-05 | 122 |
|       | Rice  |          |                                           |          |     |
| Liver | straw | Negative | abnormal morphology of embryonic tissue   | 3.08E-05 | 217 |
|       | Rice  |          |                                           |          |     |
| Liver | straw | Negative | dysmyelination                            | 3.08E-05 | 60  |
|       | Rice  |          |                                           |          |     |
| Liver | straw | Negative | formation of filopodia                    | 3.13E-05 | 72  |
|       | Rice  |          |                                           |          |     |
| Liver | straw | Negative | apoptosis of sarcoma cell lines           | 3.16E-05 | 81  |
| Liver | Rice  | Negative | bone mineral density                      | 3.17E-05 | 75  |

|       |       |          |                                            |          |     |
|-------|-------|----------|--------------------------------------------|----------|-----|
|       | straw |          |                                            |          |     |
|       | Rice  |          |                                            |          |     |
| Liver | straw | Negative | movement of vascular endothelial cells     | 3.18E-05 | 78  |
|       | Rice  |          |                                            |          |     |
| Liver | straw | Negative | degeneration of neurons                    | 3.20E-05 | 100 |
|       | Rice  |          |                                            |          |     |
| Liver | straw | Negative | morphology of bone                         | 3.32E-05 | 180 |
|       | Rice  |          |                                            |          |     |
| Liver | straw | Negative | dephosphorylation of protein               | 3.38E-05 | 80  |
|       | Rice  |          |                                            |          |     |
| Liver | straw | Negative | expansion of cells                         | 3.48E-05 | 124 |
|       | Rice  |          |                                            |          |     |
| Liver | straw | Negative | transformation of fibroblast cell lines    | 3.54E-05 | 107 |
|       | Rice  |          |                                            |          |     |
| Liver | straw | Negative | permeability of cells                      | 3.59E-05 | 46  |
|       | Rice  |          |                                            |          |     |
| Liver | straw | Negative | cell death of central nervous system cells | 3.59E-05 | 120 |
|       | Rice  |          |                                            |          |     |
| Liver | straw | Negative | chemotaxis of myeloid cells                | 3.59E-05 | 120 |
|       | Rice  |          |                                            |          |     |
| Liver | straw | Negative | quantity of reactive oxygen species        | 3.63E-05 | 76  |
|       | Rice  |          |                                            |          |     |
| Liver | straw | Negative | production of reactive oxygen species      | 3.65E-05 | 148 |
|       | Rice  |          |                                            |          |     |
| Liver | straw | Negative | phagocytosis of cells                      | 3.77E-05 | 112 |
|       | Rice  |          |                                            |          |     |
| Liver | straw | Negative | arrest in interphase                       | 3.77E-05 | 167 |
|       | Rice  |          |                                            |          |     |
| Liver | straw | Negative | migration of smooth muscle cells           | 3.77E-05 | 65  |
|       | Rice  |          |                                            |          |     |
| Liver | straw | Negative | cell movement of macrophages               | 3.77E-05 | 110 |
|       | Rice  |          |                                            |          |     |
| Liver | straw | Negative | homing of leukocytes                       | 3.82E-05 | 152 |
|       | Rice  |          |                                            |          |     |
| Liver | straw | Negative | concentration of phosphatidic acid         | 3.88E-05 | 60  |
|       | Rice  |          |                                            |          |     |
| Liver | straw | Negative | size of cells                              | 3.99E-05 | 172 |
|       | Rice  |          |                                            |          |     |
| Liver | straw | Negative | recruitment of blood cells                 | 4.02E-05 | 134 |
|       | Rice  |          |                                            |          |     |
| Liver | straw | Negative | multiple congenital anomalies              | 4.03E-05 | 169 |
|       | Rice  |          |                                            |          |     |
| Liver | straw | Negative | cell death of hematopoietic cells          | 4.04E-05 | 99  |
| Liver | Rice  | Negative | uptake of monosaccharide                   | 4.04E-05 | 111 |

|       |       |          |                                         |          |     |
|-------|-------|----------|-----------------------------------------|----------|-----|
|       | straw |          |                                         |          |     |
|       | Rice  |          |                                         |          |     |
| Liver | straw | Negative | recruitment of leukocytes               | 4.11E-05 | 132 |
|       | Rice  |          |                                         |          |     |
| Liver | straw | Negative | autophagy                               | 4.12E-05 | 151 |
|       | Rice  |          |                                         |          |     |
| Liver | straw | Negative | dysgenesis                              | 4.12E-05 | 213 |
|       | Rice  |          |                                         |          |     |
| Liver | straw | Negative | generation of T lymphocytes             | 4.12E-05 | 52  |
|       | Rice  |          |                                         |          |     |
| Liver | straw | Negative | adhesion of tumor cell lines            | 4.14E-05 | 118 |
|       | Rice  |          |                                         |          |     |
| Liver | straw | Negative | synthesis of terpenoid                  | 4.21E-05 | 116 |
|       | Rice  |          |                                         |          |     |
| Liver | straw | Negative | branching of neurites                   | 4.26E-05 | 114 |
|       | Rice  |          |                                         |          |     |
| Liver | straw | Negative | formation of eye                        | 4.35E-05 | 175 |
|       | Rice  |          |                                         |          |     |
| Liver | straw | Negative | experimentally-induced arthritis        | 4.40E-05 | 66  |
|       | Rice  |          |                                         |          |     |
| Liver | straw | Negative | advanced malignant tumor                | 4.50E-05 | 326 |
|       | Rice  |          |                                         |          |     |
| Liver | straw | Negative | permeability of epithelial tissue       | 4.65E-05 | 32  |
|       | Rice  |          |                                         |          |     |
| Liver | straw | Negative | cellular degradation                    | 4.77E-05 | 105 |
|       | Rice  |          |                                         |          |     |
| Liver | straw | Negative | size of lesion                          | 4.77E-05 | 105 |
|       | Rice  |          |                                         |          |     |
| Liver | straw | Negative | apoptosis of embryonic cells            | 4.79E-05 | 45  |
|       | Rice  |          |                                         |          |     |
| Liver | straw | Negative | experimentally-induced diabetes         | 4.82E-05 | 44  |
|       | Rice  |          |                                         |          |     |
| Liver | straw | Negative | morphology of muscle cells              | 4.96E-05 | 71  |
|       | Rice  |          |                                         |          |     |
| Liver | straw | Negative | activation of lymphocytes               | 4.96E-05 | 183 |
|       | Rice  |          |                                         |          |     |
| Liver | straw | Negative | recruitment of antigen presenting cells | 4.98E-05 | 54  |
|       | Rice  |          |                                         |          |     |
| Liver | straw | Negative | morphology of blood cells               | 5.08E-05 | 166 |
|       | Rice  |          |                                         |          |     |
| Liver | straw | Negative | cell death of brain                     | 5.09E-05 | 119 |
|       | Rice  |          |                                         |          |     |
| Liver | straw | Negative | chronic inflammatory disorder           | 5.10E-05 | 372 |
| Liver | Rice  | Negative | branching of neurons                    | 5.18E-05 | 117 |

|       |       |          |                                              |          |     |
|-------|-------|----------|----------------------------------------------|----------|-----|
|       | straw |          |                                              |          |     |
|       | Rice  |          |                                              |          |     |
| Liver | straw | Negative | morphogenesis of neurites                    | 5.24E-05 | 167 |
|       | Rice  |          |                                              |          |     |
| Liver | straw | Negative | degeneration of central nervous system       | 5.35E-05 | 58  |
|       | Rice  |          |                                              |          |     |
| Liver | straw | Negative | anoikis                                      | 5.56E-05 | 51  |
|       | Rice  |          |                                              |          |     |
| Liver | straw | Negative | phagocytosis                                 | 5.78E-05 | 121 |
|       | Rice  |          |                                              |          |     |
| Liver | straw | Negative | cell viability of cervical cancer cell lines | 5.85E-05 | 92  |
|       | Rice  |          |                                              |          |     |
| Liver | straw | Negative | size of bone                                 | 6.27E-05 | 113 |
|       | Rice  |          |                                              |          |     |
| Liver | straw | Negative | neoplasia of cells                           | 6.31E-05 | 176 |
|       | Rice  |          |                                              |          |     |
| Liver | straw | Negative | metabolism of DNA                            | 6.37E-05 | 159 |
|       | Rice  |          |                                              |          |     |
| Liver | straw | Negative | engulfment of tumor cell lines               | 6.62E-05 | 63  |
|       | Rice  |          |                                              |          |     |
| Liver | straw | Negative | size of embryo                               | 7.07E-05 | 143 |
|       | Rice  |          |                                              |          |     |
| Liver | straw | Negative | Wound                                        | 7.11E-05 | 94  |
|       | Rice  |          |                                              |          |     |
| Liver | straw | Negative | cell death of lymphatic system cells         | 7.39E-05 | 51  |
|       | Rice  |          |                                              |          |     |
| Liver | straw | Negative | concentration of cholesterol                 | 7.51E-05 | 118 |
|       | Rice  |          |                                              |          |     |
| Liver | straw | Negative | migration of vascular endothelial cells      | 7.62E-05 | 71  |
|       | Rice  |          |                                              |          |     |
| Liver | straw | Negative | mass of connective tissue                    | 7.74E-05 | 84  |
|       | Rice  |          |                                              |          |     |
| Liver | straw | Negative | allergy                                      | 7.76E-05 | 161 |
|       | Rice  |          |                                              |          |     |
| Liver | straw | Negative | apoptosis of T lymphocytes                   | 7.80E-05 | 114 |
|       | Rice  |          |                                              |          |     |
| Liver | straw | Negative | G1 phase                                     | 7.92E-05 | 155 |
|       | Rice  |          |                                              |          |     |
| Liver | straw | Negative | adhesion of immune cells                     | 7.94E-05 | 140 |
|       | Rice  |          |                                              |          |     |
| Liver | straw | Negative | cell movement of antigen presenting cells    | 7.94E-05 | 140 |
|       | Rice  |          |                                              |          |     |
| Liver | straw | Negative | apoptosis of mononuclear leukocytes          | 7.97E-05 | 143 |
| Liver | Rice  | Negative | morphology of lymphoid organ                 | 8.18E-05 | 156 |



|       |       |          |                                              |          |      |
|-------|-------|----------|----------------------------------------------|----------|------|
|       | straw |          |                                              |          |      |
|       | Rice  |          |                                              |          |      |
| Liver | straw | Negative | development of connective tissue cells       | 8.29E-05 | 92   |
|       | Rice  |          |                                              |          |      |
| Liver | straw | Negative | invasion of lung cancer cell lines           | 8.32E-05 | 47   |
|       | Rice  |          |                                              |          |      |
| Liver | straw | Negative | cell death of hematopoietic progenitor cells | 8.34E-05 | 94   |
|       | Rice  |          |                                              |          |      |
| Liver | straw | Negative | differentiation of muscle cell lines         | 8.65E-05 | 69   |
|       | Rice  |          |                                              |          |      |
| Liver | straw | Negative | formation of lamellipodia                    | 8.65E-05 | 69   |
|       | Rice  |          |                                              |          |      |
| Liver | straw | Negative | transport of D-glucose                       | 8.78E-05 | 62   |
|       | Rice  |          |                                              |          |      |
| Liver | straw | Negative | regeneration of muscle                       | 8.80E-05 | 37   |
|       | Rice  |          |                                              |          |      |
| Liver | straw | Negative | abdominal carcinoma                          | 8.85E-05 | 2128 |
|       | Rice  |          |                                              |          |      |
| Liver | straw | Negative | seizure disorder                             | 9.01E-05 | 185  |
|       | Rice  |          |                                              |          |      |
| Liver | straw | Negative | cell death of stem cells                     | 9.04E-05 | 39   |
|       | Rice  |          |                                              |          |      |
| Liver | straw | Negative | abnormal morphology of lymph node            | 9.04E-05 | 65   |
|       | Rice  |          |                                              |          |      |
| Liver | straw | Negative | apoptosis of myeloid cells                   | 9.26E-05 | 79   |
|       | Rice  |          |                                              |          |      |
| Liver | straw | Negative | cellular infiltration by granulocytes        | 9.53E-05 | 88   |
|       | Rice  |          |                                              |          |      |
| Liver | straw | Negative | cancer of cells                              | 9.63E-05 | 104  |
|       | Rice  |          |                                              |          |      |
| Liver | straw | Negative | diabetic nephropathy                         | 9.63E-05 | 64   |
|       | Rice  |          |                                              |          |      |
| Liver | straw | Negative | function of muscle                           | 9.70E-05 | 139  |
|       | Rice  |          |                                              |          |      |
| Liver | straw | Negative | morphology of intestine                      | 9.77E-05 | 94   |
|       | Rice  |          |                                              |          |      |
| Liver | straw | Negative | shape change of neurons                      | 9.79E-05 | 118  |
|       | Rice  |          |                                              |          |      |
| Liver | straw | Negative | differentiation of epithelial cells          | 1.00E-04 | 126  |
|       | Rice  |          |                                              |          |      |
| Liver | straw | Negative | morphology of reproductive system            | 1.01E-04 | 209  |
|       | Rice  |          |                                              |          |      |
| Liver | straw | Negative | migration of carcinoma cell lines            | 1.05E-04 | 72   |
| Liver | Rice  | Negative | binding of endothelial cells                 | 1.09E-04 | 47   |

|       |        |          |                                       |          |      |
|-------|--------|----------|---------------------------------------|----------|------|
|       | straw  |          |                                       |          |      |
|       | Rice   |          |                                       |          |      |
| Liver | straw  | Negative | shape change of neurites              | 1.09E-04 | 115  |
|       | Rice   |          |                                       |          |      |
| Liver | straw  | Negative | cytopenia                             | 1.10E-04 | 120  |
|       | Rice   |          |                                       |          |      |
| Liver | straw  | Negative | concentration of sterol               | 1.13E-04 | 123  |
|       | Rice   |          |                                       |          |      |
| Liver | straw  | Negative | function of phagocytes                | 1.13E-04 | 123  |
|       | Rice   |          |                                       |          |      |
| Liver | straw  | Negative | cell death of myeloid cells           | 1.13E-04 | 88   |
|       | Rice   |          |                                       |          |      |
| Liver | straw  | Negative | colorectal neoplasia                  | 1.15E-04 | 1555 |
|       | Rice   |          |                                       |          |      |
| Liver | straw  | Negative | expansion of blood cells              | 1.15E-04 | 94   |
|       | Rice   |          |                                       |          |      |
| Liver | straw  | Negative | aggregation of blood cells            | 1.15E-04 | 96   |
|       | Rice   |          |                                       |          |      |
| Liver | straw  | Negative | synthesis of polysaccharide           | 1.15E-04 | 76   |
|       | Rice   |          |                                       |          |      |
| Liver | straw  | Negative | formation of lung                     | 1.15E-04 | 121  |
|       | Rice   |          |                                       |          |      |
| Liver | straw  | Negative | abnormal morphology of lymphoid organ | 1.17E-04 | 150  |
|       | Rice   |          |                                       |          |      |
| Liver | straw  | Negative | chemotaxis of leukocytes              | 1.19E-04 | 141  |
|       | Rice   |          |                                       |          |      |
| Liver | straw  | Negative | serine phosphorylation                | 1.19E-04 | 43   |
|       | Rice   |          |                                       |          |      |
| Liver | straw  | Negative | concentration of glutathione          | 1.22E-04 | 37   |
|       | Corn   |          |                                       |          |      |
| Liver | stover | Positive | proliferation of cells                | 1.19E-53 | 1663 |
|       | Corn   |          |                                       |          |      |
| Liver | stover | Positive | cancer                                | 2.00E-40 | 4119 |
|       | Corn   |          |                                       |          |      |
| Liver | stover | Positive | cell death                            | 2.00E-40 | 1472 |
|       | Corn   |          |                                       |          |      |
| Liver | stover | Positive | malignant solid tumor                 | 4.04E-39 | 4069 |
|       | Corn   |          |                                       |          |      |
| Liver | stover | Positive | organismal death                      | 6.73E-38 | 1100 |
|       | Corn   |          |                                       |          |      |
| Liver | stover | Positive | morbidity or mortality                | 8.40E-38 | 1112 |
|       | Corn   |          |                                       |          |      |
| Liver | stover | Positive | morphology of cells                   | 2.19E-37 | 921  |
| Liver | Corn   | Positive | necrosis                              | 1.05E-33 | 1150 |

|       |                |          |                                |          |      |
|-------|----------------|----------|--------------------------------|----------|------|
|       | stover<br>Corn |          |                                |          |      |
| Liver | stover<br>Corn | Positive | apoptosis                      | 2.22E-32 | 1171 |
| Liver | stover<br>Corn | Positive | cell movement                  | 2.98E-32 | 972  |
| Liver | stover<br>Corn | Positive | organization of cytoplasm      | 6.47E-30 | 727  |
| Liver | stover<br>Corn | Positive | migration of cells             | 3.25E-28 | 867  |
| Liver | stover<br>Corn | Positive | neoplasia of epithelial tissue | 3.12E-26 | 3378 |
| Liver | stover<br>Corn | Positive | tumorigenesis of tissue        | 4.41E-26 | 3428 |
| Liver | stover<br>Corn | Positive | epithelial cancer              | 1.18E-24 | 3339 |
| Liver | stover<br>Corn | Positive | organization of cytoskeleton   | 1.18E-24 | 651  |
| Liver | stover<br>Corn | Positive | cellular homeostasis           | 1.41E-24 | 701  |
| Liver | stover<br>Corn | Positive | vasculogenesis                 | 4.30E-24 | 377  |
| Liver | stover<br>Corn | Positive | angiogenesis                   | 6.11E-24 | 449  |
| Liver | stover<br>Corn | Positive | abnormal morphology of cells   | 3.18E-23 | 593  |
| Liver | stover<br>Corn | Positive | expression of RNA              | 4.05E-23 | 937  |
| Liver | stover<br>Corn | Positive | transcription                  | 9.10E-23 | 877  |
| Liver | stover<br>Corn | Positive | abdominal neoplasm             | 2.09E-22 | 3330 |
| Liver | stover<br>Corn | Positive | cell survival                  | 4.32E-22 | 639  |
| Liver | stover<br>Corn | Positive | transport of molecule          | 7.74E-22 | 724  |
| Liver | stover<br>Corn | Positive | quantity of cells              | 3.08E-21 | 782  |
| Liver | stover<br>Corn | Positive | abdominal cancer               | 7.15E-21 | 3284 |
| Liver | stover<br>Corn | Positive | differentiation of cells       | 9.89E-21 | 964  |
| Liver | stover         | Positive | cell death of tumor cell lines | 1.06E-20 | 685  |
| Liver | Corn           | Positive | transcription of RNA           | 1.40E-20 | 813  |

|       |        |          |                                          |          |      |
|-------|--------|----------|------------------------------------------|----------|------|
|       | stover |          |                                          |          |      |
|       | Corn   |          |                                          |          |      |
| Liver | stover | Positive | invasion of cells                        | 1.65E-20 | 421  |
|       | Corn   |          |                                          |          |      |
| Liver | stover | Positive | cell viability                           | 3.10E-20 | 594  |
|       | Corn   |          |                                          |          |      |
| Liver | stover | Positive | cell movement of tumor cell lines        | 3.93E-20 | 412  |
|       | Corn   |          |                                          |          |      |
| Liver | stover | Positive | microtubule dynamics                     | 2.25E-19 | 544  |
|       | Corn   |          |                                          |          |      |
| Liver | stover | Positive | Viral Infection                          | 2.58E-19 | 712  |
|       | Corn   |          |                                          |          |      |
| Liver | stover | Positive | apoptosis of tumor cell lines            | 1.03E-18 | 552  |
|       | Corn   |          |                                          |          |      |
| Liver | stover | Positive | proliferation of tumor cell lines        | 1.71E-18 | 683  |
|       | Corn   |          |                                          |          |      |
| Liver | stover | Positive | cell death of connective tissue cells    | 1.71E-18 | 301  |
|       | Corn   |          |                                          |          |      |
| Liver | stover | Positive | morphology of cardiovascular system      | 4.16E-18 | 307  |
|       | Corn   |          |                                          |          |      |
| Liver | stover | Positive | digestive organ tumor                    | 1.14E-17 | 2872 |
|       | Corn   |          |                                          |          |      |
| Liver | stover | Positive | digestive system cancer                  | 1.14E-17 | 2847 |
|       | Corn   |          |                                          |          |      |
| Liver | stover | Positive | migration of tumor cell lines            | 1.48E-17 | 342  |
|       | Corn   |          |                                          |          |      |
| Liver | stover | Positive | quantity of leukocytes                   | 2.17E-17 | 428  |
|       | Corn   |          |                                          |          |      |
| Liver | stover | Positive | quantity of blood cells                  | 6.80E-17 | 471  |
|       | Corn   |          |                                          |          |      |
| Liver | stover | Positive | invasion of tumor cell lines             | 1.55E-16 | 321  |
|       | Corn   |          |                                          |          |      |
| Liver | stover | Positive | Movement Disorders                       | 1.58E-16 | 482  |
|       | Corn   |          |                                          |          |      |
| Liver | stover | Positive | proliferation of blood cells             | 2.12E-16 | 394  |
|       | Corn   |          |                                          |          |      |
| Liver | stover | Positive | proliferation of connective tissue cells | 3.06E-15 | 286  |
|       | Corn   |          |                                          |          |      |
| Liver | stover | Positive | morphology of body cavity                | 4.23E-15 | 529  |
|       | Corn   |          |                                          |          |      |
| Liver | stover | Positive | growth of connective tissue              | 4.33E-15 | 307  |
|       | Corn   |          |                                          |          |      |
| Liver | stover | Positive | proliferation of immune cells            | 4.82E-15 | 368  |
| Liver | Corn   | Positive | development of body trunk                | 4.96E-15 | 498  |

|       |        |          |                                         |          |     |
|-------|--------|----------|-----------------------------------------|----------|-----|
|       | stover |          |                                         |          |     |
|       | Corn   |          |                                         |          |     |
| Liver | stover | Positive | synthesis of lipid                      | 8.57E-15 | 335 |
|       | Corn   |          |                                         |          |     |
| Liver | stover | Positive | protein kinase cascade                  | 8.57E-15 | 211 |
|       | Corn   |          |                                         |          |     |
| Liver | stover | Positive | transcription of DNA                    | 1.27E-14 | 658 |
|       | Corn   |          |                                         |          |     |
| Liver | stover | Positive | function of leukocytes                  | 1.41E-14 | 260 |
|       | Corn   |          |                                         |          |     |
| Liver | stover | Positive | quantity of lymphocytes                 | 1.59E-14 | 331 |
|       | Corn   |          |                                         |          |     |
| Liver | stover | Positive | quantity of mononuclear leukocytes      | 2.18E-14 | 342 |
|       | Corn   |          |                                         |          |     |
| Liver | stover | Positive | proliferation of mononuclear leukocytes | 2.32E-14 | 343 |
|       | Corn   |          |                                         |          |     |
| Liver | stover | Positive | growth of epithelial tissue             | 2.32E-14 | 319 |
|       | Corn   |          |                                         |          |     |
| Liver | stover | Positive | autosomal recessive disease             | 2.83E-14 | 417 |
|       | Corn   |          |                                         |          |     |
| Liver | stover | Positive | proliferation of lymphocytes            | 2.83E-14 | 338 |
|       | Corn   |          |                                         |          |     |
| Liver | stover | Positive | survival of organism                    | 3.13E-14 | 328 |
|       | Corn   |          |                                         |          |     |
| Liver | stover | Positive | function of blood cells                 | 4.30E-14 | 279 |
|       | Corn   |          |                                         |          |     |
| Liver | stover | Positive | formation of cellular protrusions       | 5.74E-14 | 408 |
|       | Corn   |          |                                         |          |     |
| Liver | stover | Positive | abnormal morphology of body cavity      | 7.31E-14 | 502 |
|       | Corn   |          |                                         |          |     |
| Liver | stover | Positive | organization of organelle               | 8.84E-14 | 258 |
|       | Corn   |          |                                         |          |     |
| Liver | stover | Positive | concentration of lipid                  | 9.79E-14 | 370 |
|       | Corn   |          |                                         |          |     |
| Liver | stover | Positive | size of body                            | 1.78E-13 | 385 |
|       | Corn   |          |                                         |          |     |
| Liver | stover | Positive | cell death of fibroblast cell lines     | 2.17E-13 | 209 |
|       | Corn   |          |                                         |          |     |
| Liver | stover | Positive | benign neoplasia                        | 2.92E-13 | 414 |
|       | Corn   |          |                                         |          |     |
| Liver | stover | Positive | migration of blood cells                | 2.92E-13 | 393 |
|       | Corn   |          |                                         |          |     |
| Liver | stover | Positive | cell death of blood cells               | 2.97E-13 | 320 |
| Liver | Corn   | Positive | leukocyte migration                     | 3.60E-13 | 392 |

|       |                |          |                                              |          |     |
|-------|----------------|----------|----------------------------------------------|----------|-----|
|       | stover<br>Corn |          |                                              |          |     |
| Liver | stover<br>Corn | Positive | abnormal morphology of cardiovascular system | 5.27E-13 | 267 |
| Liver | stover<br>Corn | Positive | development of vasculature                   | 5.46E-13 | 204 |
| Liver | stover<br>Corn | Positive | transactivation                              | 6.67E-13 | 271 |
| Liver | stover<br>Corn | Positive | abnormal morphology of thoracic cavity       | 9.14E-13 | 274 |
| Liver | stover<br>Corn | Positive | apoptosis of fibroblast cell lines           | 1.28E-12 | 164 |
| Liver | stover<br>Corn | Positive | neuronal cell death                          | 1.71E-12 | 312 |
| Liver | stover<br>Corn | Positive | disorder of basal ganglia                    | 2.55E-12 | 346 |
| Liver | stover<br>Corn | Positive | development of cytoplasm                     | 3.10E-12 | 220 |
| Liver | stover<br>Corn | Positive | growth of organism                           | 3.90E-12 | 373 |
| Liver | stover<br>Corn | Positive | cell cycle progression                       | 4.33E-12 | 456 |
| Liver | stover<br>Corn | Positive | phosphorylation of protein                   | 4.89E-12 | 332 |
| Liver | stover<br>Corn | Positive | cell death of immune cells                   | 5.49E-12 | 301 |
| Liver | stover<br>Corn | Positive | cell movement of leukocytes                  | 7.08E-12 | 344 |
| Liver | stover<br>Corn | Positive | cell transformation                          | 7.68E-12 | 218 |
| Liver | stover<br>Corn | Positive | proliferation of fibroblast cell lines       | 9.83E-12 | 202 |
| Liver | stover<br>Corn | Positive | abnormal morphology of abdomen               | 1.10E-11 | 387 |
| Liver | stover<br>Corn | Positive | cell viability of tumor cell lines           | 1.76E-11 | 347 |
| Liver | stover<br>Corn | Positive | development of blood cells                   | 1.77E-11 | 296 |
| Liver | stover<br>Corn | Positive | cell movement of myeloid cells               | 2.83E-11 | 249 |
| Liver | stover<br>Corn | Positive | development of leukocytes                    | 2.83E-11 | 269 |
| Liver | stover         | Positive | necrosis of epithelial tissue                | 2.83E-11 | 269 |
| Liver | Corn           | Positive | morphology of lymphatic system component     | 3.76E-11 | 197 |

|       |                |          |                                         |          |      |
|-------|----------------|----------|-----------------------------------------|----------|------|
|       | stover<br>Corn |          |                                         |          |      |
| Liver | stover<br>Corn | Positive | degeneration of nervous system          | 3.83E-11 | 142  |
| Liver | stover<br>Corn | Positive | quantity of connective tissue           | 4.33E-11 | 274  |
| Liver | stover<br>Corn | Positive | infection by Retroviridae               | 4.91E-11 | 321  |
| Liver | stover<br>Corn | Positive | ubiquitination                          | 4.91E-11 | 163  |
| Liver | stover<br>Corn | Positive | interphase                              | 6.41E-11 | 295  |
| Liver | stover<br>Corn | Positive | metabolism of membrane lipid derivative | 6.79E-11 | 184  |
| Liver | stover<br>Corn | Positive | formation of cytoskeleton               | 7.44E-11 | 179  |
| Liver | stover<br>Corn | Positive | fatty acid metabolism                   | 7.95E-11 | 272  |
| Liver | stover<br>Corn | Positive | quantity of T lymphocytes               | 8.53E-11 | 245  |
| Liver | stover<br>Corn | Positive | ubiquitination of protein               | 8.88E-11 | 160  |
| Liver | stover<br>Corn | Positive | cell death of epithelial cells          | 9.67E-11 | 229  |
| Liver | stover<br>Corn | Positive | proliferation of T lymphocytes          | 9.85E-11 | 273  |
| Liver | stover<br>Corn | Positive | proliferation of hematopoietic cells    | 1.00E-10 | 127  |
| Liver | stover<br>Corn | Positive | activation of DNA endogenous promoter   | 1.19E-10 | 511  |
| Liver | stover<br>Corn | Positive | neuromuscular disease                   | 1.33E-10 | 384  |
| Liver | stover<br>Corn | Positive | growth of embryo                        | 1.52E-10 | 220  |
| Liver | stover<br>Corn | Positive | perinatal death                         | 1.67E-10 | 268  |
| Liver | stover<br>Corn | Positive | development of cardiovascular tissue    | 1.70E-10 | 175  |
| Liver | stover<br>Corn | Positive | development of lymphocytes              | 1.97E-10 | 251  |
| Liver | stover<br>Corn | Positive | infection by lentivirus                 | 2.12E-10 | 316  |
| Liver | stover         | Positive | HIV infection                           | 2.29E-10 | 315  |
| Liver | Corn           | Positive | adenocarcinoma                          | 2.51E-10 | 2451 |

|       |        |          |                                                 |          |     |
|-------|--------|----------|-------------------------------------------------|----------|-----|
|       | stover |          |                                                 |          |     |
|       | Corn   |          |                                                 |          |     |
| Liver | stover | Positive | metabolism of carbohydrate                      | 2.58E-10 | 278 |
|       | Corn   |          |                                                 |          |     |
| Liver | stover | Positive | infection by RNA virus                          | 2.74E-10 | 376 |
|       | Corn   |          |                                                 |          |     |
| Liver | stover | Positive | development of mononuclear leukocytes           | 2.89E-10 | 252 |
|       | Corn   |          |                                                 |          |     |
| Liver | stover | Positive | small GTPase mediated signal transduction       | 3.15E-10 | 95  |
|       | Corn   |          |                                                 |          |     |
| Liver | stover | Positive | development of epithelial tissue                | 3.26E-10 | 235 |
|       | Corn   |          |                                                 |          |     |
| Liver | stover | Positive | cell movement of phagocytes                     | 3.89E-10 | 248 |
|       | Corn   |          |                                                 |          |     |
| Liver | stover | Positive | neurological signs                              | 4.72E-10 | 289 |
|       | Corn   |          |                                                 |          |     |
| Liver | stover | Positive | replication of RNA virus                        | 4.72E-10 | 230 |
|       | Corn   |          |                                                 |          |     |
| Liver | stover | Positive | Neurodegeneration                               | 4.84E-10 | 148 |
|       | Corn   |          |                                                 |          |     |
| Liver | stover | Positive | transactivation of RNA                          | 5.68E-10 | 245 |
|       | Corn   |          |                                                 |          |     |
| Liver | stover | Positive | colony formation                                | 6.04E-10 | 242 |
|       | Corn   |          |                                                 |          |     |
| Liver | stover | Positive | differentiation of connective tissue cells      | 6.35E-10 | 285 |
|       | Corn   |          |                                                 |          |     |
| Liver | stover | Positive | Organ Degeneration                              | 7.26E-10 | 224 |
|       | Corn   |          |                                                 |          |     |
| Liver | stover | Positive | morphology of lymphoid organ                    | 7.79E-10 | 182 |
|       | Corn   |          |                                                 |          |     |
| Liver | stover | Positive | dyskinesia                                      | 8.25E-10 | 274 |
|       | Corn   |          |                                                 |          |     |
| Liver | stover | Positive | development of connective tissue                | 9.41E-10 | 173 |
|       | Corn   |          |                                                 |          |     |
| Liver | stover | Positive | morphology of connective tissue                 | 1.00E-09 | 210 |
|       | Corn   |          |                                                 |          |     |
| Liver | stover | Positive | proliferation of hematopoietic progenitor cells | 1.00E-09 | 119 |
|       | Corn   |          |                                                 |          |     |
| Liver | stover | Positive | morphology of vessel                            | 1.03E-09 | 146 |
|       | Corn   |          |                                                 |          |     |
| Liver | stover | Positive | apoptosis of blood cells                        | 1.17E-09 | 224 |
|       | Corn   |          |                                                 |          |     |
| Liver | stover | Positive | morphology of heart                             | 1.17E-09 | 187 |
| Liver | Corn   | Positive | autophagy                                       | 1.28E-09 | 174 |



|       |                |          |                                           |          |      |
|-------|----------------|----------|-------------------------------------------|----------|------|
|       | stover<br>Corn |          |                                           |          |      |
| Liver | stover<br>Corn | Positive | Lymphocyte homeostasis                    | 1.29E-09 | 244  |
| Liver | stover<br>Corn | Positive | apoptosis of connective tissue cells      | 1.32E-09 | 141  |
| Liver | stover<br>Corn | Positive | quantity of lymphatic system component    | 1.44E-09 | 175  |
| Liver | stover<br>Corn | Positive | fibrogenesis                              | 1.45E-09 | 189  |
| Liver | stover<br>Corn | Positive | endothelial cell development              | 1.49E-09 | 165  |
| Liver | stover<br>Corn | Positive | colony formation of cells                 | 1.55E-09 | 222  |
| Liver | stover<br>Corn | Positive | breast or ovarian cancer                  | 1.60E-09 | 770  |
| Liver | stover<br>Corn | Positive | development of endothelial tissue         | 1.60E-09 | 170  |
| Liver | stover<br>Corn | Positive | abdominal adenocarcinoma                  | 1.66E-09 | 2229 |
| Liver | stover<br>Corn | Positive | development of lymphatic system           | 1.67E-09 | 166  |
| Liver | stover<br>Corn | Positive | replication of virus                      | 1.69E-09 | 250  |
| Liver | stover<br>Corn | Positive | development of lymphatic system component | 1.90E-09 | 146  |
| Liver | stover<br>Corn | Positive | homeostasis of leukocytes                 | 2.13E-09 | 247  |
| Liver | stover<br>Corn | Positive | quantity of carbohydrate                  | 2.22E-09 | 232  |
| Liver | stover<br>Corn | Positive | activation of cells                       | 2.43E-09 | 414  |
| Liver | stover<br>Corn | Positive | cell death of fibroblasts                 | 2.43E-09 | 127  |
| Liver | stover<br>Corn | Positive | abnormal morphology of epithelial tissue  | 2.49E-09 | 191  |
| Liver | stover<br>Corn | Positive | metabolism of protein                     | 2.49E-09 | 412  |
| Liver | stover<br>Corn | Positive | morphology of digestive system            | 2.80E-09 | 253  |
| Liver | stover<br>Corn | Positive | cellular infiltration by leukocytes       | 2.90E-09 | 178  |
| Liver | stover         | Positive | engulfment of cells                       | 2.90E-09 | 186  |
| Liver | Corn           | Positive | abnormal morphology of digestive system   | 3.01E-09 | 242  |

|       |                |          |                                              |          |      |
|-------|----------------|----------|----------------------------------------------|----------|------|
|       | stover<br>Corn |          |                                              |          |      |
| Liver | stover<br>Corn | Positive | female genital tract serous cancer           | 3.06E-09 | 177  |
| Liver | stover<br>Corn | Positive | T cell development                           | 3.07E-09 | 225  |
| Liver | stover<br>Corn | Positive | chorea                                       | 3.14E-09 | 255  |
| Liver | stover<br>Corn | Positive | differentiation of connective tissue         | 3.37E-09 | 316  |
| Liver | stover<br>Corn | Positive | Huntington's Disease                         | 3.37E-09 | 254  |
| Liver | stover<br>Corn | Positive | concentration of phospholipid                | 3.39E-09 | 92   |
| Liver | stover<br>Corn | Positive | autosomal dominant disease                   | 3.59E-09 | 279  |
| Liver | stover<br>Corn | Positive | arthropathy                                  | 3.82E-09 | 403  |
| Liver | stover<br>Corn | Positive | cell movement of neutrophils                 | 3.84E-09 | 140  |
| Liver | stover<br>Corn | Positive | morphology of bone                           | 4.05E-09 | 203  |
| Liver | stover<br>Corn | Positive | congenital anomaly of musculoskeletal system | 4.12E-09 | 318  |
| Liver | stover<br>Corn | Positive | advanced malignant tumor                     | 4.45E-09 | 361  |
| Liver | stover<br>Corn | Positive | secretion of molecule                        | 4.51E-09 | 244  |
| Liver | stover<br>Corn | Positive | infection of cells                           | 4.60E-09 | 342  |
| Liver | stover<br>Corn | Positive | cellular infiltration of cells               | 4.63E-09 | 181  |
| Liver | stover<br>Corn | Positive | quantity of lymphoid organ                   | 4.63E-09 | 144  |
| Liver | stover<br>Corn | Positive | cell death of T lymphocytes                  | 4.78E-09 | 147  |
| Liver | stover<br>Corn | Positive | vascularization                              | 4.78E-09 | 114  |
| Liver | stover<br>Corn | Positive | proliferation of epithelial cells            | 4.91E-09 | 220  |
| Liver | stover<br>Corn | Positive | breast or colorectal cancer                  | 5.41E-09 | 1885 |
| Liver | stover         | Positive | abnormal morphology of lymphoid organ        | 5.42E-09 | 173  |
| Liver | Corn           | Positive | formation of leukocytes                      | 5.44E-09 | 81   |

|       |                |          |                                      |          |      |
|-------|----------------|----------|--------------------------------------|----------|------|
|       | stover<br>Corn |          |                                      |          |      |
| Liver | stover<br>Corn | Positive | differentiation of leukocytes        | 5.48E-09 | 292  |
| Liver | stover<br>Corn | Positive | synthesis of carbohydrate            | 6.05E-09 | 192  |
| Liver | stover<br>Corn | Positive | endocytosis                          | 6.23E-09 | 159  |
| Liver | stover<br>Corn | Positive | experimentally-induced diabetes      | 6.23E-09 | 53   |
| Liver | stover<br>Corn | Positive | morphology of blood vessel           | 6.56E-09 | 133  |
| Liver | stover<br>Corn | Positive | genital tumor                        | 6.83E-09 | 1548 |
| Liver | stover<br>Corn | Positive | cellular infiltration                | 6.95E-09 | 197  |
| Liver | stover<br>Corn | Positive | arthritis                            | 7.26E-09 | 395  |
| Liver | stover<br>Corn | Positive | quantity of B lymphocytes            | 7.45E-09 | 159  |
| Liver | stover<br>Corn | Positive | synthesis of fatty acid              | 7.87E-09 | 145  |
| Liver | stover<br>Corn | Positive | morphology of nervous system         | 8.38E-09 | 335  |
| Liver | stover<br>Corn | Positive | peripheral vascular disease          | 9.16E-09 | 173  |
| Liver | stover<br>Corn | Positive | homing of cells                      | 9.48E-09 | 245  |
| Liver | stover<br>Corn | Positive | formation of blood cells             | 9.56E-09 | 97   |
| Liver | stover<br>Corn | Positive | formation of filaments               | 9.56E-09 | 180  |
| Liver | stover<br>Corn | Positive | formation of lymphoid organ          | 9.56E-09 | 125  |
| Liver | stover<br>Corn | Positive | formation of cells                   | 9.73E-09 | 412  |
| Liver | stover<br>Corn | Positive | growth of lesion                     | 1.01E-08 | 340  |
| Liver | stover<br>Corn | Positive | T cell homeostasis                   | 1.03E-08 | 228  |
| Liver | stover<br>Corn | Positive | function of phagocytes               | 1.13E-08 | 142  |
| Liver | stover         | Positive | differentiation of epithelial tissue | 1.13E-08 | 164  |
| Liver | Corn           | Positive | growth of tumor                      | 1.22E-08 | 339  |

|       |        |          |                                         |          |      |
|-------|--------|----------|-----------------------------------------|----------|------|
|       | stover |          |                                         |          |      |
|       | Corn   |          |                                         |          |      |
| Liver | stover | Positive | formation of lymphatic system component | 1.29E-08 | 136  |
|       | Corn   |          |                                         |          |      |
| Liver | stover | Positive | cell death of epithelial cell lines     | 1.29E-08 | 132  |
|       | Corn   |          |                                         |          |      |
| Liver | stover | Positive | gastrointestinal carcinoma              | 1.40E-08 | 1722 |
|       | Corn   |          |                                         |          |      |
| Liver | stover | Positive | infection by HIV-1                      | 1.41E-08 | 265  |
|       | Corn   |          |                                         |          |      |
| Liver | stover | Positive | serous neoplasm                         | 1.41E-08 | 265  |
|       | Corn   |          |                                         |          |      |
| Liver | stover | Positive | cell death of mononuclear leukocytes    | 1.42E-08 | 179  |
|       | Corn   |          |                                         |          |      |
| Liver | stover | Positive | cell movement of granulocytes           | 1.48E-08 | 168  |
|       | Corn   |          |                                         |          |      |
| Liver | stover | Positive | abnormal morphology of bone             | 1.48E-08 | 195  |
|       | Corn   |          |                                         |          |      |
| Liver | stover | Positive | binding of DNA                          | 1.70E-08 | 229  |
|       | Corn   |          |                                         |          |      |
| Liver | stover | Positive | degeneration of cells                   | 1.75E-08 | 157  |
|       | Corn   |          |                                         |          |      |
| Liver | stover | Positive | morphology of head                      | 1.84E-08 | 369  |
|       | Corn   |          |                                         |          |      |
| Liver | stover | Positive | I-kappaB kinase/NF-kappaB cascade       | 1.87E-08 | 86   |
|       | Corn   |          |                                         |          |      |
| Liver | stover | Positive | homing                                  | 1.91E-08 | 250  |
|       | Corn   |          |                                         |          |      |
| Liver | stover | Positive | formation of skin                       | 2.01E-08 | 166  |
|       | Corn   |          |                                         |          |      |
| Liver | stover | Positive | function of myeloid cells               | 2.01E-08 | 113  |
|       | Corn   |          |                                         |          |      |
| Liver | stover | Positive | gonadal tumor                           | 2.02E-08 | 347  |
|       | Corn   |          |                                         |          |      |
| Liver | stover | Positive | morphology of skin                      | 2.03E-08 | 127  |
|       | Corn   |          |                                         |          |      |
| Liver | stover | Positive | concentration of fatty acid             | 2.15E-08 | 130  |
|       | Corn   |          |                                         |          |      |
| Liver | stover | Positive | metabolism of phospholipid              | 2.16E-08 | 111  |
|       | Corn   |          |                                         |          |      |
| Liver | stover | Positive | epileptic seizure                       | 2.52E-08 | 83   |
|       | Corn   |          |                                         |          |      |
| Liver | stover | Positive | cell movement of endothelial cells      | 3.02E-08 | 160  |
| Liver | Corn   | Positive | cell death of lymphocytes               | 3.02E-08 | 173  |

|       |                |          |                                          |          |     |
|-------|----------------|----------|------------------------------------------|----------|-----|
|       | stover<br>Corn |          |                                          |          |     |
| Liver | stover<br>Corn | Positive | apoptosis of leukocytes                  | 3.19E-08 | 202 |
| Liver | stover<br>Corn | Positive | size of embryo                           | 3.37E-08 | 161 |
| Liver | stover<br>Corn | Positive | congenital malformation of skeleton      | 3.37E-08 | 188 |
| Liver | stover<br>Corn | Positive | behavior                                 | 3.41E-08 | 411 |
| Liver | stover<br>Corn | Positive | differentiation of bone                  | 3.44E-08 | 183 |
| Liver | stover<br>Corn | Positive | development of abdomen                   | 3.44E-08 | 251 |
| Liver | stover<br>Corn | Positive | development of head                      | 3.44E-08 | 408 |
| Liver | stover<br>Corn | Positive | sprouting                                | 3.52E-08 | 173 |
| Liver | stover<br>Corn | Positive | cell spreading                           | 3.62E-08 | 128 |
| Liver | stover<br>Corn | Positive | synthesis of nitric oxide                | 3.62E-08 | 128 |
| Liver | stover<br>Corn | Positive | concentration of phosphatidic acid       | 3.78E-08 | 69  |
| Liver | stover<br>Corn | Positive | adenoma                                  | 3.95E-08 | 240 |
| Liver | stover<br>Corn | Positive | apoptosis of cervical cancer cell lines  | 3.98E-08 | 130 |
| Liver | stover<br>Corn | Positive | quantity of immunoglobulin               | 4.24E-08 | 136 |
| Liver | stover<br>Corn | Positive | abnormal morphology of head              | 4.24E-08 | 350 |
| Liver | stover<br>Corn | Positive | size of animal                           | 4.27E-08 | 87  |
| Liver | stover<br>Corn | Positive | proliferation of fibroblasts             | 4.45E-08 | 159 |
| Liver | stover<br>Corn | Positive | proliferation of neuronal cells          | 4.45E-08 | 249 |
| Liver | stover<br>Corn | Positive | generation of leukocytes                 | 4.45E-08 | 80  |
| Liver | stover<br>Corn | Positive | differentiation of bone cells            | 4.53E-08 | 181 |
| Liver | stover         | Positive | synthesis of DNA                         | 4.70E-08 | 185 |
| Liver | Corn           | Positive | cell death of cervical cancer cell lines | 4.70E-08 | 158 |

|       |                |          |                                      |          |      |
|-------|----------------|----------|--------------------------------------|----------|------|
|       | stover<br>Corn |          |                                      |          |      |
| Liver | stover<br>Corn | Positive | development of body axis             | 4.72E-08 | 434  |
| Liver | stover<br>Corn | Positive | tumorigenesis of gonad               | 5.07E-08 | 340  |
| Liver | stover<br>Corn | Positive | cell death of liver                  | 5.11E-08 | 112  |
| Liver | stover<br>Corn | Positive | abdominal carcinoma                  | 5.18E-08 | 2242 |
| Liver | stover<br>Corn | Positive | activation of enzyme                 | 5.66E-08 | 173  |
| Liver | stover<br>Corn | Positive | recruitment of cells                 | 5.85E-08 | 160  |
| Liver | stover<br>Corn | Positive | growth of skin                       | 5.89E-08 | 103  |
| Liver | stover<br>Corn | Positive | generation of blood cells            | 5.89E-08 | 81   |
| Liver | stover<br>Corn | Positive | gastrointestinal tract cancer        | 6.02E-08 | 1905 |
| Liver | stover<br>Corn | Positive | G1 phase                             | 6.67E-08 | 173  |
| Liver | stover<br>Corn | Positive | necrosis of liver                    | 6.70E-08 | 111  |
| Liver | stover<br>Corn | Positive | hypersensitive reaction              | 7.79E-08 | 189  |
| Liver | stover<br>Corn | Positive | abnormal morphology of lymph node    | 8.00E-08 | 75   |
| Liver | stover<br>Corn | Positive | morphology of lymph node             | 8.02E-08 | 79   |
| Liver | stover<br>Corn | Positive | Oral Cancer and Tumors               | 8.04E-08 | 107  |
| Liver | stover<br>Corn | Positive | metastasis                           | 8.18E-08 | 320  |
| Liver | stover<br>Corn | Positive | growth of lymphatic system component | 8.48E-08 | 92   |
| Liver | stover<br>Corn | Positive | Ovarian Cancer and Tumors            | 8.80E-08 | 319  |
| Liver | stover<br>Corn | Positive | craniofacial abnormality             | 8.80E-08 | 159  |
| Liver | stover<br>Corn | Positive | quantity of hematopoietic cells      | 9.96E-08 | 194  |
| Liver | stover         | Positive | differentiation of blood cells       | 1.03E-07 | 352  |
| Liver | Corn           | Positive | oral cancer                          | 1.06E-07 | 106  |

|       |                |          |                                            |          |     |
|-------|----------------|----------|--------------------------------------------|----------|-----|
|       | stover<br>Corn |          |                                            |          |     |
| Liver | stover<br>Corn | Positive | cell death of liver cells                  | 1.07E-07 | 93  |
| Liver | stover<br>Corn | Positive | apoptosis of epithelial cells              | 1.07E-07 | 130 |
| Liver | stover<br>Corn | Positive | function of mononuclear leukocytes         | 1.11E-07 | 153 |
| Liver | stover<br>Corn | Positive | neoplasia of cells                         | 1.15E-07 | 194 |
| Liver | stover<br>Corn | Positive | arrest in interphase                       | 1.18E-07 | 183 |
| Liver | stover<br>Corn | Positive | organization of filaments                  | 1.19E-07 | 97  |
| Liver | stover<br>Corn | Positive | quantity of hematopoietic progenitor cells | 1.23E-07 | 193 |
| Liver | stover<br>Corn | Positive | uptake of monosaccharide                   | 1.31E-07 | 123 |
| Liver | stover<br>Corn | Positive | migration of endothelial cells             | 1.38E-07 | 147 |
| Liver | stover<br>Corn | Positive | mammary tumor                              | 1.39E-07 | 652 |
| Liver | stover<br>Corn | Positive | multiple congenital anomalies              | 1.39E-07 | 185 |
| Liver | stover<br>Corn | Positive | function of lymphocytes                    | 1.40E-07 | 152 |
| Liver | stover<br>Corn | Positive | cell viability of carcinoma cell lines     | 1.41E-07 | 71  |
| Liver | stover<br>Corn | Positive | cardiogenesis                              | 1.42E-07 | 205 |
| Liver | stover<br>Corn | Positive | morphology of cardiovascular tissue        | 1.42E-07 | 47  |
| Liver | stover<br>Corn | Positive | quantity of thymus gland                   | 1.49E-07 | 108 |
| Liver | stover<br>Corn | Positive | abnormal morphology of embryonic tissue    | 1.57E-07 | 235 |
| Liver | stover<br>Corn | Positive | development of neurons                     | 1.57E-07 | 327 |
| Liver | stover<br>Corn | Positive | growth of muscle tissue                    | 1.57E-07 | 165 |
| Liver | stover<br>Corn | Positive | paraproteinemia                            | 1.57E-07 | 150 |
| Liver | stover         | Positive | abnormal morphology of heart               | 1.65E-07 | 169 |
| Liver | Corn           | Positive | quantity of epithelial tissue              | 1.67E-07 | 85  |

|       |                |          |                                           |          |      |
|-------|----------------|----------|-------------------------------------------|----------|------|
|       | stover<br>Corn |          |                                           |          |      |
| Liver | stover<br>Corn | Positive | proliferation of muscle cells             | 1.68E-07 | 164  |
| Liver | stover<br>Corn | Positive | Gastrointestinal Tract Cancer and Tumors  | 1.70E-07 | 1929 |
| Liver | stover<br>Corn | Positive | midline defect                            | 1.75E-07 | 121  |
| Liver | stover<br>Corn | Positive | production of antibody                    | 1.75E-07 | 140  |
| Liver | stover<br>Corn | Positive | apoptosis of epithelial cell lines        | 1.76E-07 | 104  |
| Liver | stover<br>Corn | Positive | morphology of secondary lymphoid organ    | 1.83E-07 | 127  |
| Liver | stover<br>Corn | Positive | expansion of cells                        | 1.87E-07 | 136  |
| Liver | stover<br>Corn | Positive | cell death of skin                        | 1.98E-07 | 54   |
| Liver | stover<br>Corn | Positive | degeneration of neurons                   | 2.07E-07 | 110  |
| Liver | stover<br>Corn | Positive | development of hematopoietic system       | 2.07E-07 | 114  |
| Liver | stover<br>Corn | Positive | function of cardiovascular system         | 2.10E-07 | 163  |
| Liver | stover<br>Corn | Positive | uptake of carbohydrate                    | 2.11E-07 | 131  |
| Liver | stover<br>Corn | Positive | quantity of phagocytes                    | 2.11E-07 | 185  |
| Liver | stover<br>Corn | Positive | Dermatitis                                | 2.13E-07 | 189  |
| Liver | stover<br>Corn | Positive | differentiation of embryonic tissue       | 2.28E-07 | 116  |
| Liver | stover<br>Corn | Positive | chemotaxis of cells                       | 2.31E-07 | 226  |
| Liver | stover<br>Corn | Positive | proliferation of epidermal cells          | 2.32E-07 | 81   |
| Liver | stover<br>Corn | Positive | plasma cell dyscrasia                     | 2.33E-07 | 149  |
| Liver | stover<br>Corn | Positive | organization of actin cytoskeleton        | 2.37E-07 | 135  |
| Liver | stover<br>Corn | Positive | cell viability of connective tissue cells | 2.37E-07 | 66   |
| Liver | stover         | Positive | differentiation of epithelial cells       | 2.47E-07 | 140  |
| Liver | Corn           | Positive | differentiation of lymphocytes            | 2.47E-07 | 214  |



|       |                |          |                                      |          |      |
|-------|----------------|----------|--------------------------------------|----------|------|
|       | stover<br>Corn |          |                                      |          |      |
| Liver | stover<br>Corn | Positive | differentiation of embryonic cells   | 2.60E-07 | 105  |
| Liver | stover<br>Corn | Positive | morphology of respiratory system     | 2.62E-07 | 139  |
| Liver | stover<br>Corn | Positive | proliferation of endothelial cells   | 2.62E-07 | 139  |
| Liver | stover<br>Corn | Positive | ovarian cancer                       | 2.78E-07 | 298  |
| Liver | stover<br>Corn | Positive | function of antigen presenting cells | 2.79E-07 | 112  |
| Liver | stover<br>Corn | Positive | morphology of spleen                 | 2.80E-07 | 126  |
| Liver | stover<br>Corn | Positive | production of protein                | 2.81E-07 | 146  |
| Liver | stover<br>Corn | Positive | ion homeostasis of cells             | 2.81E-07 | 237  |
| Liver | stover<br>Corn | Positive | Inflammatory Bowel Disease           | 3.21E-07 | 117  |
| Liver | stover<br>Corn | Positive | recruitment of leukocytes            | 3.22E-07 | 144  |
| Liver | stover<br>Corn | Positive | inflammation of organ                | 3.31E-07 | 475  |
| Liver | stover<br>Corn | Positive | generation of lymphocytes            | 3.34E-07 | 69   |
| Liver | stover<br>Corn | Positive | Rheumatic Disease                    | 3.50E-07 | 438  |
| Liver | stover<br>Corn | Positive | peripheral arterial disease          | 3.56E-07 | 98   |
| Liver | stover<br>Corn | Positive | chemotaxis                           | 3.59E-07 | 232  |
| Liver | stover<br>Corn | Positive | Growth Failure                       | 3.81E-07 | 253  |
| Liver | stover<br>Corn | Positive | seizure disorder                     | 3.94E-07 | 202  |
| Liver | stover<br>Corn | Positive | formation of osteoclasts             | 4.02E-07 | 61   |
| Liver | stover<br>Corn | Positive | apoptosis of skin                    | 4.09E-07 | 49   |
| Liver | stover<br>Corn | Positive | recruitment of macrophages           | 4.13E-07 | 54   |
| Liver | stover         | Positive | inflammatory response                | 4.19E-07 | 323  |
| Liver | Corn           | Positive | female genital neoplasm              | 4.23E-07 | 1351 |

|       |        |          |                                           |          |     |
|-------|--------|----------|-------------------------------------------|----------|-----|
|       | stover |          |                                           |          |     |
|       | Corn   |          |                                           |          |     |
| Liver | stover | Positive | blood protein disorder                    | 4.26E-07 | 164 |
|       | Corn   |          |                                           |          |     |
| Liver | stover | Positive | apoptosis of liver                        | 4.27E-07 | 76  |
|       | Corn   |          |                                           |          |     |
| Liver | stover | Positive | formation of lung                         | 4.28E-07 | 134 |
|       | Corn   |          |                                           |          |     |
| Liver | stover | Positive | cellular degradation                      | 4.33E-07 | 115 |
|       | Corn   |          |                                           |          |     |
| Liver | stover | Positive | abnormal morphology of nervous system     | 4.33E-07 | 302 |
|       | Corn   |          |                                           |          |     |
| Liver | stover | Positive | cell death of breast cancer cell lines    | 4.33E-07 | 147 |
|       | Corn   |          |                                           |          |     |
| Liver | stover | Positive | cell death of keratinocytes               | 4.38E-07 | 46  |
|       | Corn   |          |                                           |          |     |
| Liver | stover | Positive | generation of mononuclear leukocytes      | 4.42E-07 | 70  |
|       | Corn   |          |                                           |          |     |
| Liver | stover | Positive | development of digestive system           | 4.65E-07 | 167 |
|       | Corn   |          |                                           |          |     |
| Liver | stover | Positive | synthesis of phospholipid                 | 4.73E-07 | 83  |
|       | Corn   |          |                                           |          |     |
| Liver | stover | Positive | production of reactive oxygen species     | 4.73E-07 | 160 |
|       | Corn   |          |                                           |          |     |
| Liver | stover | Positive | mitosis                                   | 4.74E-07 | 212 |
|       | Corn   |          |                                           |          |     |
| Liver | stover | Positive | cell death of heart cells                 | 4.74E-07 | 101 |
|       | Corn   |          |                                           |          |     |
| Liver | stover | Positive | apoptosis of dermal cells                 | 4.88E-07 | 47  |
|       | Corn   |          |                                           |          |     |
| Liver | stover | Positive | cell death of embryonic cells             | 4.93E-07 | 58  |
|       | Corn   |          |                                           |          |     |
| Liver | stover | Positive | apoptosis of hematopoietic cell lines     | 4.94E-07 | 95  |
|       | Corn   |          |                                           |          |     |
| Liver | stover | Positive | apoptosis of fibroblasts                  | 4.94E-07 | 100 |
|       | Corn   |          |                                           |          |     |
| Liver | stover | Positive | cell death of heart                       | 5.05E-07 | 104 |
|       | Corn   |          |                                           |          |     |
| Liver | stover | Positive | maturation of cells                       | 5.11E-07 | 196 |
|       | Corn   |          |                                           |          |     |
| Liver | stover | Positive | morphology of endothelial tissue          | 5.13E-07 | 44  |
|       | Corn   |          |                                           |          |     |
| Liver | stover | Positive | recruitment of antigen presenting cells   | 5.23E-07 | 60  |
| Liver | Corn   | Positive | abnormal morphology of respiratory system | 5.23E-07 | 136 |

|       |        |          |                                           |          |     |
|-------|--------|----------|-------------------------------------------|----------|-----|
|       | stover |          |                                           |          |     |
|       | Corn   |          |                                           |          |     |
| Liver | stover | Positive | cell death of epidermal cells             | 5.34E-07 | 48  |
|       | Corn   |          |                                           |          |     |
| Liver | stover | Positive | neuritogenesis                            | 5.40E-07 | 246 |
|       | Corn   |          |                                           |          |     |
| Liver | stover | Positive | Bleeding                                  | 5.57E-07 | 183 |
|       | Corn   |          |                                           |          |     |
| Liver | stover | Positive | cell death of tumor                       | 5.69E-07 | 166 |
|       | Corn   |          |                                           |          |     |
| Liver | stover | Positive | growth of embryonic tissue                | 5.70E-07 | 123 |
|       | Corn   |          |                                           |          |     |
| Liver | stover | Positive | recruitment of blood cells                | 5.70E-07 | 145 |
|       | Corn   |          |                                           |          |     |
| Liver | stover | Positive | quantity of thymocytes                    | 5.86E-07 | 105 |
|       | Corn   |          |                                           |          |     |
| Liver | stover | Positive | branching of cells                        | 5.89E-07 | 161 |
|       | Corn   |          |                                           |          |     |
| Liver | stover | Positive | synthesis of reactive oxygen species      | 5.91E-07 | 205 |
|       | Corn   |          |                                           |          |     |
| Liver | stover | Positive | proliferation of dermal cells             | 5.92E-07 | 83  |
|       | Corn   |          |                                           |          |     |
| Liver | stover | Positive | abnormal morphology of blood vessel       | 5.94E-07 | 119 |
|       | Corn   |          |                                           |          |     |
| Liver | stover | Positive | cell viability of blood cells             | 6.00E-07 | 128 |
|       | Corn   |          |                                           |          |     |
| Liver | stover | Positive | apoptosis of T lymphocytes                | 6.00E-07 | 125 |
|       | Corn   |          |                                           |          |     |
| Liver | stover | Positive | apoptosis of mononuclear leukocytes       | 6.01E-07 | 156 |
|       | Corn   |          |                                           |          |     |
| Liver | stover | Positive | differentiation of mononuclear leukocytes | 6.14E-07 | 229 |
|       | Corn   |          |                                           |          |     |
| Liver | stover | Positive | cell death of dermal cells                | 6.24E-07 | 50  |
|       | Corn   |          |                                           |          |     |
| Liver | stover | Positive | proliferation of smooth muscle cells      | 6.35E-07 | 127 |
|       | Corn   |          |                                           |          |     |
| Liver | stover | Positive | cytopenia                                 | 6.64E-07 | 132 |
|       | Corn   |          |                                           |          |     |
| Liver | stover | Positive | S phase                                   | 6.64E-07 | 117 |
|       | Corn   |          |                                           |          |     |
| Liver | stover | Positive | abnormal morphology of skin               | 6.66E-07 | 110 |
|       | Corn   |          |                                           |          |     |
| Liver | stover | Positive | learning                                  | 6.73E-07 | 180 |
| Liver | Corn   | Positive | polymerization of protein                 | 6.73E-07 | 161 |

|       |                |          |                                         |          |      |
|-------|----------------|----------|-----------------------------------------|----------|------|
|       | stover<br>Corn |          |                                         |          |      |
| Liver | stover<br>Corn | Positive | apoptosis of keratinocytes              | 6.73E-07 | 43   |
| Liver | stover<br>Corn | Positive | apoptosis of neurons                    | 7.18E-07 | 187  |
| Liver | stover<br>Corn | Positive | tumorigenesis of genital organ          | 7.18E-07 | 1478 |
| Liver | stover<br>Corn | Positive | benign neoplasm of female genital organ | 7.20E-07 | 183  |
| Liver | stover<br>Corn | Positive | dysgenesis                              | 7.40E-07 | 228  |
| Liver | stover<br>Corn | Positive | quantity of IgG                         | 7.88E-07 | 103  |
| Liver | stover<br>Corn | Positive | apoptosis of muscle                     | 8.02E-07 | 117  |
| Liver | stover<br>Corn | Positive | transmembrane potential of mitochondria | 8.16E-07 | 98   |
| Liver | stover<br>Corn | Positive | genital tract cancer                    | 8.39E-07 | 1465 |
| Liver | stover<br>Corn | Positive | cognition                               | 8.63E-07 | 194  |
| Liver | stover<br>Corn | Positive | apoptosis of epidermal cells            | 8.64E-07 | 45   |
| Liver | stover<br>Corn | Positive | seizures                                | 8.91E-07 | 172  |
| Liver | stover<br>Corn | Positive | quantity of glycosphingolipid           | 9.08E-07 | 50   |
| Liver | stover<br>Corn | Positive | autophagy of cells                      | 9.11E-07 | 118  |
| Liver | stover<br>Corn | Positive | migration of connective tissue cells    | 9.26E-07 | 84   |
| Liver | stover<br>Corn | Positive | apoptosis of liver cells                | 9.41E-07 | 74   |
| Liver | stover<br>Corn | Positive | cell death of hematopoietic cells       | 9.57E-07 | 107  |
| Liver | stover<br>Corn | Positive | skin abnormality                        | 9.65E-07 | 103  |
| Liver | stover<br>Corn | Positive | formation of actin filaments            | 9.72E-07 | 134  |
| Liver | stover<br>Corn | Positive | chronic inflammatory disorder           | 9.72E-07 | 395  |
| Liver | stover         | Positive | neoplasia of tumor cell lines           | 9.78E-07 | 139  |
| Liver | Corn           | Positive | accumulation of cells                   | 9.98E-07 | 153  |

|       |                |          |                                                    |          |     |
|-------|----------------|----------|----------------------------------------------------|----------|-----|
|       | stover<br>Corn |          |                                                    |          |     |
| Liver | stover<br>Corn | Positive | bone mineral density                               | 1.01E-06 | 81  |
| Liver | stover<br>Corn | Positive | morphogenesis of neurons                           | 1.01E-06 | 182 |
| Liver | stover<br>Corn | Positive | apoptosis of muscle cells                          | 1.01E-06 | 116 |
| Liver | stover<br>Corn | Positive | allergy                                            | 1.02E-06 | 174 |
| Liver | stover<br>Corn | Positive | uptake of D-hexose                                 | 1.06E-06 | 101 |
| Liver | stover<br>Corn | Positive | proliferation of lymphatic system cells            | 1.06E-06 | 92  |
| Liver | stover<br>Corn | Positive | adhesion of tumor cell lines                       | 1.07E-06 | 127 |
| Liver | stover<br>Corn | Positive | metabolism of nucleic acid component or derivative | 1.09E-06 | 219 |
| Liver | stover<br>Corn | Positive | cell death of hematopoietic cell lines             | 1.11E-06 | 104 |
| Liver | stover<br>Corn | Positive | uptake of D-glucose                                | 1.11E-06 | 100 |
| Liver | stover<br>Corn | Positive | immune response of cells                           | 1.13E-06 | 240 |
| Liver | stover<br>Corn | Positive | necrosis of tumor                                  | 1.14E-06 | 164 |
| Liver | stover<br>Corn | Positive | cell death of muscle cells                         | 1.16E-06 | 146 |
| Liver | stover<br>Corn | Positive | cell surface receptor linked signal transduction   | 1.25E-06 | 130 |
| Liver | stover<br>Corn | Positive | morphology of reproductive system                  | 1.31E-06 | 225 |
| Liver | stover<br>Corn | Positive | apoptosis of heart cells                           | 1.31E-06 | 87  |
| Liver | stover<br>Corn | Positive | formation of plasma membrane projections           | 1.33E-06 | 249 |
| Liver | stover<br>Corn | Positive | migration of fibroblasts                           | 1.33E-06 | 68  |
| Liver | stover<br>Corn | Positive | metabolism of reactive oxygen species              | 1.34E-06 | 211 |
| Liver | stover<br>Corn | Positive | neonatal death                                     | 1.40E-06 | 187 |
| Liver | stover         | Positive | growth of neurites                                 | 1.42E-06 | 196 |
| Liver | Corn           | Positive | apoptosis of lymphocytes                           | 1.42E-06 | 150 |

|       |                |          |                                              |          |     |
|-------|----------------|----------|----------------------------------------------|----------|-----|
|       | stover<br>Corn |          |                                              |          |     |
| Liver | stover<br>Corn | Positive | differentiation of tumor cell lines          | 1.42E-06 | 163 |
| Liver | stover<br>Corn | Positive | recruitment of phagocytes                    | 1.43E-06 | 110 |
| Liver | stover<br>Corn | Positive | migration of muscle cells                    | 1.45E-06 | 77  |
| Liver | stover<br>Corn | Positive | transport of protein                         | 1.54E-06 | 132 |
| Liver | stover<br>Corn | Positive | activation of Protein kinase                 | 1.55E-06 | 112 |
| Liver | stover<br>Corn | Positive | abnormal morphology of spleen                | 1.56E-06 | 118 |
| Liver | stover<br>Corn | Positive | MAPKKK cascade                               | 1.57E-06 | 93  |
| Liver | stover<br>Corn | Positive | respiratory system development               | 1.63E-06 | 148 |
| Liver | stover<br>Corn | Positive | breast cancer                                | 1.65E-06 | 601 |
| Liver | stover<br>Corn | Positive | development of connective tissue cells       | 1.68E-06 | 100 |
| Liver | stover<br>Corn | Positive | concentration of acylglycerol                | 1.71E-06 | 145 |
| Liver | stover<br>Corn | Positive | apoptosis of embryonic cells                 | 1.75E-06 | 49  |
| Liver | stover<br>Corn | Positive | generation of cells                          | 1.76E-06 | 116 |
| Liver | stover<br>Corn | Positive | invasion of carcinoma cell lines             | 1.80E-06 | 90  |
| Liver | stover<br>Corn | Positive | degeneration of central nervous system       | 1.80E-06 | 63  |
| Liver | stover<br>Corn | Positive | cell death of hematopoietic progenitor cells | 1.85E-06 | 102 |
| Liver | stover<br>Corn | Positive | cell movement of fibroblasts                 | 1.85E-06 | 84  |
| Liver | stover<br>Corn | Positive | export of molecule                           | 1.86E-06 | 129 |
| Liver | stover<br>Corn | Positive | aggregation of cells                         | 1.91E-06 | 141 |
| Liver | stover<br>Corn | Positive | cell movement of muscle cells                | 1.92E-06 | 83  |
| Liver | stover         | Positive | growth of plasma membrane projections        | 1.93E-06 | 197 |
| Liver | Corn           | Positive | function of macrophages                      | 1.99E-06 | 82  |

|       |                |          |                                            |          |     |
|-------|----------------|----------|--------------------------------------------|----------|-----|
|       | stover<br>Corn |          |                                            |          |     |
| Liver | stover<br>Corn | Positive | Hypoplasia                                 | 2.03E-06 | 212 |
| Liver | stover<br>Corn | Positive | quantity of protein in blood               | 2.14E-06 | 213 |
| Liver | stover<br>Corn | Positive | formation of connective tissue cells       | 2.18E-06 | 95  |
| Liver | stover<br>Corn | Positive | proliferation of breast cancer cell lines  | 2.26E-06 | 184 |
| Liver | stover<br>Corn | Positive | binding of protein binding site            | 2.28E-06 | 126 |
| Liver | stover<br>Corn | Positive | generation of T lymphocytes                | 2.29E-06 | 56  |
| Liver | stover<br>Corn | Positive | cell movement of macrophages               | 2.39E-06 | 117 |
| Liver | stover<br>Corn | Positive | apoptosis of hepatocytes                   | 2.42E-06 | 63  |
| Liver | stover<br>Corn | Positive | apoptosis of hematopoietic cells           | 2.42E-06 | 97  |
| Liver | stover<br>Corn | Positive | congenital anomaly of skin                 | 2.54E-06 | 82  |
| Liver | stover<br>Corn | Positive | arrest in proliferation of cells           | 2.55E-06 | 96  |
| Liver | stover<br>Corn | Positive | cell death of cardiomyocytes               | 2.55E-06 | 96  |
| Liver | stover<br>Corn | Positive | cell death of muscle                       | 2.58E-06 | 148 |
| Liver | stover<br>Corn | Positive | activation of leukocytes                   | 2.66E-06 | 287 |
| Liver | stover<br>Corn | Positive | quantity of metal ion                      | 2.70E-06 | 187 |
| Liver | stover<br>Corn | Positive | abnormal morphology of reproductive system | 2.72E-06 | 213 |
| Liver | stover<br>Corn | Positive | growth of lymphoid organ                   | 2.84E-06 | 79  |
| Liver | stover<br>Corn | Positive | cell death of sarcoma cell lines           | 2.92E-06 | 101 |
| Liver | stover<br>Corn | Positive | apoptosis of cardiomyocytes                | 2.94E-06 | 84  |
| Liver | stover<br>Corn | Positive | cell death of central nervous system cells | 3.00E-06 | 127 |
| Liver | stover         | Positive | quantity of IgM                            | 3.17E-06 | 65  |
| Liver | Corn           | Positive | formation of actin stress fibers           | 3.24E-06 | 106 |

|       |        |          |                                                |          |      |
|-------|--------|----------|------------------------------------------------|----------|------|
|       | stover |          |                                                |          |      |
|       | Corn   |          |                                                |          |      |
| Liver | stover | Positive | necrosis of muscle                             | 3.24E-06 | 147  |
|       | Corn   |          |                                                |          |      |
| Liver | stover | Positive | cell death of B-lymphocyte derived cell lines  | 3.25E-06 | 61   |
|       | Corn   |          |                                                |          |      |
| Liver | stover | Positive | formation of thymus gland                      | 3.26E-06 | 75   |
|       | Corn   |          |                                                |          |      |
| Liver | stover | Positive | morphogenesis of neurites                      | 3.26E-06 | 177  |
|       | Corn   |          |                                                |          |      |
| Liver | stover | Positive | activation of blood cells                      | 3.29E-06 | 305  |
|       | Corn   |          |                                                |          |      |
| Liver | stover | Positive | urogenital cancer                              | 3.44E-06 | 1665 |
|       | Corn   |          |                                                |          |      |
| Liver | stover | Positive | phosphorylation of L-amino acid                | 3.45E-06 | 98   |
|       | Corn   |          | intermediate disease stage peripheral arterial |          |      |
| Liver | stover | Positive | disease                                        | 3.45E-06 | 73   |
|       | Corn   |          |                                                |          |      |
| Liver | stover | Positive | necrosis of cardiac muscle                     | 3.65E-06 | 97   |
|       | Corn   |          |                                                |          |      |
| Liver | stover | Positive | transformation of fibroblast cell lines        | 3.68E-06 | 113  |
|       | Corn   |          |                                                |          |      |
| Liver | stover | Positive | migration of smooth muscle cells               | 3.86E-06 | 69   |
|       | Corn   |          |                                                |          |      |
| Liver | stover | Positive | differentiation of T lymphocytes               | 3.91E-06 | 161  |
|       | Corn   |          |                                                |          |      |
| Liver | stover | Positive | quantity of metal                              | 3.91E-06 | 208  |
|       | Corn   |          |                                                |          |      |
| Liver | stover | Positive | formation of filopodia                         | 4.03E-06 | 76   |
|       | Corn   |          |                                                |          |      |
| Liver | stover | Positive | function of T lymphocytes                      | 4.15E-06 | 114  |
|       | Corn   |          |                                                |          |      |
| Liver | stover | Positive | migration of breast cancer cell lines          | 4.18E-06 | 108  |
|       | Corn   |          |                                                |          |      |
| Liver | stover | Positive | cell death of tumor cells                      | 4.19E-06 | 158  |
|       | Corn   |          |                                                |          |      |
| Liver | stover | Positive | mass of organism                               | 4.28E-06 | 143  |
|       | Corn   |          |                                                |          |      |
| Liver | stover | Positive | female genital tract serous carcinoma          | 4.29E-06 | 90   |
|       | Corn   |          |                                                |          |      |
| Liver | stover | Positive | cell movement of smooth muscle cells           | 4.30E-06 | 74   |
|       | Corn   |          |                                                |          |      |
| Liver | stover | Positive | accumulation of lipid                          | 4.30E-06 | 129  |
| Liver | Corn   | Positive | long-term potentiation                         | 4.42E-06 | 107  |



|       |                |          |                                             |          |      |
|-------|----------------|----------|---------------------------------------------|----------|------|
|       | stover<br>Corn |          |                                             |          |      |
| Liver | stover<br>Corn | Positive | cellular infiltration by macrophages        | 4.43E-06 | 73   |
| Liver | stover<br>Corn | Positive | cell death of brain                         | 4.46E-06 | 126  |
| Liver | stover<br>Corn | Positive | occlusion of blood vessel                   | 4.47E-06 | 201  |
| Liver | stover<br>Corn | Positive | proliferation of embryonic cells            | 4.70E-06 | 109  |
| Liver | stover<br>Corn | Positive | cell death of hepatocytes                   | 4.70E-06 | 71   |
| Liver | stover<br>Corn | Positive | quantity of antigen presenting cells        | 4.72E-06 | 120  |
| Liver | stover<br>Corn | Positive | apoptosis of hematopoietic progenitor cells | 4.74E-06 | 92   |
| Liver | stover<br>Corn | Positive | cell movement of breast cancer cell lines   | 4.74E-06 | 125  |
| Liver | stover<br>Corn | Negative | proliferation of cells                      | 1.09E-43 | 1322 |
| Liver | stover<br>Corn | Negative | cell death                                  | 7.74E-37 | 1187 |
| Liver | stover<br>Corn | Negative | morbidity or mortality                      | 1.22E-36 | 910  |
| Liver | stover<br>Corn | Negative | organismal death                            | 1.57E-36 | 899  |
| Liver | stover<br>Corn | Negative | necrosis                                    | 3.28E-36 | 952  |
| Liver | stover<br>Corn | Negative | apoptosis                                   | 3.45E-32 | 957  |
| Liver | stover<br>Corn | Negative | morphology of cells                         | 2.08E-29 | 731  |
| Liver | stover<br>Corn | Negative | malignant solid tumor                       | 3.52E-29 | 3184 |
| Liver | stover<br>Corn | Negative | cancer                                      | 3.78E-29 | 3218 |
| Liver | stover<br>Corn | Negative | cell movement                               | 3.77E-24 | 765  |
| Liver | stover<br>Corn | Negative | cell death of tumor cell lines              | 3.66E-23 | 574  |
| Liver | stover<br>Corn | Negative | differentiation of cells                    | 4.16E-22 | 793  |
| Liver | stover         | Negative | organization of cytoplasm                   | 9.64E-22 | 570  |
| Liver | Corn           | Negative | neoplasia of epithelial tissue              | 2.33E-21 | 2656 |

|       |        |          |                                       |          |      |
|-------|--------|----------|---------------------------------------|----------|------|
|       | stover |          |                                       |          |      |
|       | Corn   |          |                                       |          |      |
| Liver | stover | Negative | tumorigenesis of tissue               | 4.41E-21 | 2694 |
|       | Corn   |          |                                       |          |      |
| Liver | stover | Negative | cell survival                         | 4.58E-21 | 523  |
|       | Corn   |          |                                       |          |      |
| Liver | stover | Negative | epithelial cancer                     | 3.27E-20 | 2626 |
|       | Corn   |          |                                       |          |      |
| Liver | stover | Negative | cell viability                        | 3.43E-20 | 490  |
|       | Corn   |          |                                       |          |      |
| Liver | stover | Negative | quantity of cells                     | 3.59E-20 | 636  |
|       | Corn   |          |                                       |          |      |
| Liver | stover | Negative | apoptosis of tumor cell lines         | 4.38E-20 | 461  |
|       | Corn   |          |                                       |          |      |
| Liver | stover | Negative | abdominal neoplasm                    | 1.48E-19 | 2626 |
|       | Corn   |          |                                       |          |      |
| Liver | stover | Negative | organization of cytoskeleton          | 1.48E-19 | 517  |
|       | Corn   |          |                                       |          |      |
| Liver | stover | Negative | migration of cells                    | 6.57E-19 | 671  |
|       | Corn   |          |                                       |          |      |
| Liver | stover | Negative | abdominal cancer                      | 1.33E-18 | 2592 |
|       | Corn   |          |                                       |          |      |
| Liver | stover | Negative | expression of RNA                     | 2.15E-18 | 742  |
|       | Corn   |          |                                       |          |      |
| Liver | stover | Negative | transport of molecule                 | 4.02E-18 | 578  |
|       | Corn   |          |                                       |          |      |
| Liver | stover | Negative | transcription                         | 5.72E-18 | 694  |
|       | Corn   |          |                                       |          |      |
| Liver | stover | Negative | transcription of RNA                  | 2.78E-17 | 649  |
|       | Corn   |          |                                       |          |      |
| Liver | stover | Negative | quantity of leukocytes                | 7.58E-17 | 353  |
|       | Corn   |          |                                       |          |      |
| Liver | stover | Negative | microtubule dynamics                  | 1.16E-16 | 438  |
|       | Corn   |          |                                       |          |      |
| Liver | stover | Negative | angiogenesis                          | 1.35E-16 | 349  |
|       | Corn   |          |                                       |          |      |
| Liver | stover | Negative | quantity of blood cells               | 2.44E-16 | 387  |
|       | Corn   |          |                                       |          |      |
| Liver | stover | Negative | cell death of connective tissue cells | 2.68E-16 | 246  |
|       | Corn   |          |                                       |          |      |
| Liver | stover | Negative | development of cytoplasm              | 5.49E-16 | 196  |
|       | Corn   |          |                                       |          |      |
| Liver | stover | Negative | digestive organ tumor                 | 6.71E-16 | 2270 |
| Liver | Corn   | Negative | abnormal morphology of cells          | 6.71E-16 | 460  |

|       |                |          |                                     |          |      |
|-------|----------------|----------|-------------------------------------|----------|------|
|       | stover<br>Corn |          |                                     |          |      |
| Liver | stover<br>Corn | Negative | cellular homeostasis                | 1.28E-15 | 538  |
| Liver | stover<br>Corn | Negative | digestive system cancer             | 1.44E-15 | 2248 |
| Liver | stover<br>Corn | Negative | morphology of cardiovascular system | 3.57E-15 | 248  |
| Liver | stover<br>Corn | Negative | formation of cytoskeleton           | 9.08E-15 | 162  |
| Liver | stover<br>Corn | Negative | vasculogenesis                      | 1.63E-14 | 285  |
| Liver | stover<br>Corn | Negative | Viral Infection                     | 1.70E-14 | 560  |
| Liver | stover<br>Corn | Negative | proliferation of tumor cell lines   | 5.14E-14 | 538  |
| Liver | stover<br>Corn | Negative | fibrogenesis                        | 7.11E-14 | 172  |
| Liver | stover<br>Corn | Negative | morphology of body cavity           | 1.04E-13 | 428  |
| Liver | stover<br>Corn | Negative | transcription of DNA                | 1.30E-13 | 532  |
| Liver | stover<br>Corn | Negative | growth of organism                  | 1.31E-13 | 314  |
| Liver | stover<br>Corn | Negative | protein kinase cascade              | 2.26E-13 | 174  |
| Liver | stover<br>Corn | Negative | development of body trunk           | 2.34E-13 | 402  |
| Liver | stover<br>Corn | Negative | formation of cellular protrusions   | 2.84E-13 | 334  |
| Liver | stover<br>Corn | Negative | abnormal morphology of body cavity  | 5.85E-13 | 408  |
| Liver | stover<br>Corn | Negative | transactivation                     | 7.09E-13 | 226  |
| Liver | stover<br>Corn | Negative | development of epithelial tissue    | 8.19E-13 | 205  |
| Liver | stover<br>Corn | Negative | formation of filaments              | 1.89E-12 | 163  |
| Liver | stover<br>Corn | Negative | cell death of fibroblast cell lines | 2.13E-12 | 173  |
| Liver | stover<br>Corn | Negative | Growth Failure                      | 2.28E-12 | 231  |
| Liver | stover         | Negative | size of body                        | 2.97E-12 | 313  |
| Liver | Corn           | Negative | quantity of lymphocytes             | 3.99E-12 | 266  |

|       |                |          |                                              |          |     |
|-------|----------------|----------|----------------------------------------------|----------|-----|
|       | stover<br>Corn |          |                                              |          |     |
| Liver | stover<br>Corn | Negative | quantity of mononuclear leukocytes           | 4.28E-12 | 275 |
| Liver | stover<br>Corn | Negative | abnormal morphology of cardiovascular system | 6.41E-12 | 219 |
| Liver | stover<br>Corn | Negative | necrosis of epithelial tissue                | 6.50E-12 | 226 |
| Liver | stover<br>Corn | Negative | cell movement of leukocytes                  | 8.36E-12 | 284 |
| Liver | stover<br>Corn | Negative | migration of blood cells                     | 8.88E-12 | 318 |
| Liver | stover<br>Corn | Negative | development of vasculature                   | 8.92E-12 | 168 |
| Liver | stover<br>Corn | Negative | cell movement of tumor cell lines            | 8.99E-12 | 311 |
| Liver | stover<br>Corn | Negative | proliferation of blood cells                 | 9.32E-12 | 308 |
| Liver | stover<br>Corn | Negative | transactivation of RNA                       | 1.11E-11 | 210 |
| Liver | stover<br>Corn | Negative | leukocyte migration                          | 1.11E-11 | 317 |
| Liver | stover<br>Corn | Negative | cell death of epithelial cells               | 1.32E-11 | 194 |
| Liver | stover<br>Corn | Negative | abnormal morphology of thoracic cavity       | 1.32E-11 | 224 |
| Liver | stover<br>Corn | Negative | behavior                                     | 1.92E-11 | 353 |
| Liver | stover<br>Corn | Negative | growth of epithelial tissue                  | 2.06E-11 | 254 |
| Liver | stover<br>Corn | Negative | homing                                       | 4.07E-11 | 218 |
| Liver | stover<br>Corn | Negative | homing of cells                              | 6.03E-11 | 212 |
| Liver | stover<br>Corn | Negative | growth of embryo                             | 6.22E-11 | 185 |
| Liver | stover<br>Corn | Negative | apoptosis of fibroblast cell lines           | 7.45E-11 | 134 |
| Liver | stover<br>Corn | Negative | function of blood cells                      | 8.23E-11 | 221 |
| Liver | stover<br>Corn | Negative | morphology of connective tissue              | 8.48E-11 | 179 |
| Liver | stover         | Negative | Movement Disorders                           | 1.01E-10 | 371 |
| Liver | Corn           | Negative | proliferation of immune cells                | 1.14E-10 | 287 |

|       |                |          |                                          |          |     |
|-------|----------------|----------|------------------------------------------|----------|-----|
|       | stover<br>Corn |          |                                          |          |     |
| Liver | stover<br>Corn | Negative | formation of actin filaments             | 1.47E-10 | 125 |
| Liver | stover<br>Corn | Negative | cell death of fibroblasts                | 1.53E-10 | 111 |
| Liver | stover<br>Corn | Negative | cell viability of tumor cell lines       | 1.65E-10 | 282 |
| Liver | stover<br>Corn | Negative | disorder of basal ganglia                | 1.82E-10 | 278 |
| Liver | stover<br>Corn | Negative | organization of organelle                | 1.82E-10 | 204 |
| Liver | stover<br>Corn | Negative | proliferation of connective tissue cells | 2.69E-10 | 221 |
| Liver | stover<br>Corn | Negative | cell cycle progression                   | 2.77E-10 | 365 |
| Liver | stover<br>Corn | Negative | development of cardiovascular tissue     | 3.76E-10 | 146 |
| Liver | stover<br>Corn | Negative | survival of organism                     | 4.08E-10 | 256 |
| Liver | stover<br>Corn | Negative | morphology of heart                      | 4.27E-10 | 158 |
| Liver | stover<br>Corn | Negative | morphogenesis of neurons                 | 6.10E-10 | 164 |
| Liver | stover<br>Corn | Negative | proliferation of neuronal cells          | 6.19E-10 | 214 |
| Liver | stover<br>Corn | Negative | long-term potentiation                   | 6.23E-10 | 102 |
| Liver | stover<br>Corn | Negative | activation of DNA endogenous promoter    | 6.23E-10 | 413 |
| Liver | stover<br>Corn | Negative | invasion of cells                        | 6.30E-10 | 308 |
| Liver | stover<br>Corn | Negative | neuromuscular disease                    | 6.79E-10 | 312 |
| Liver | stover<br>Corn | Negative | neuritogenesis                           | 7.00E-10 | 216 |
| Liver | stover<br>Corn | Negative | infection of cells                       | 7.00E-10 | 285 |
| Liver | stover<br>Corn | Negative | metabolism of protein                    | 7.09E-10 | 340 |
| Liver | stover<br>Corn | Negative | proliferation of mononuclear leukocytes  | 7.15E-10 | 266 |
| Liver | stover         | Negative | quantity of T lymphocytes                | 8.09E-10 | 200 |
| Liver | Corn           | Negative | proliferation of lymphocytes             | 8.81E-10 | 262 |

|       |                |          |                                            |          |      |
|-------|----------------|----------|--------------------------------------------|----------|------|
|       | stover<br>Corn |          |                                            |          |      |
| Liver | stover<br>Corn | Negative | degeneration of cells                      | 9.27E-10 | 136  |
| Liver | stover<br>Corn | Negative | Neurodegeneration                          | 9.45E-10 | 124  |
| Liver | stover<br>Corn | Negative | function of leukocytes                     | 1.20E-09 | 200  |
| Liver | stover<br>Corn | Negative | development of endothelial tissue          | 1.20E-09 | 143  |
| Liver | stover<br>Corn | Negative | formation of plasma membrane projections   | 1.44E-09 | 219  |
| Liver | stover<br>Corn | Negative | growth of connective tissue                | 1.87E-09 | 234  |
| Liver | stover<br>Corn | Negative | cell movement of myeloid cells             | 2.06E-09 | 200  |
| Liver | stover<br>Corn | Negative | differentiation of connective tissue cells | 2.50E-09 | 233  |
| Liver | stover<br>Corn | Negative | formation of actin stress fibers           | 2.50E-09 | 99   |
| Liver | stover<br>Corn | Negative | growth of muscle tissue                    | 3.29E-09 | 144  |
| Liver | stover<br>Corn | Negative | proliferation of endothelial cells         | 3.58E-09 | 123  |
| Liver | stover<br>Corn | Negative | proliferation of muscle cells              | 3.94E-09 | 143  |
| Liver | stover<br>Corn | Negative | infection by RNA virus                     | 4.02E-09 | 303  |
| Liver | stover<br>Corn | Negative | development of lymphatic system            | 4.29E-09 | 138  |
| Liver | stover<br>Corn | Negative | development of neurons                     | 4.96E-09 | 276  |
| Liver | stover<br>Corn | Negative | maturation of cells                        | 4.96E-09 | 171  |
| Liver | stover<br>Corn | Negative | breast or colorectal cancer                | 4.96E-09 | 1501 |
| Liver | stover<br>Corn | Negative | chemotaxis                                 | 4.99E-09 | 200  |
| Liver | stover<br>Corn | Negative | phosphorylation of protein                 | 5.25E-09 | 261  |
| Liver | stover<br>Corn | Negative | proliferation of fibroblast cell lines     | 5.25E-09 | 160  |
| Liver | stover         | Negative | cognition                                  | 5.77E-09 | 170  |
| Liver | Corn           | Negative | morphology of nervous system               | 5.85E-09 | 276  |

|       |                |          |                                           |          |     |
|-------|----------------|----------|-------------------------------------------|----------|-----|
|       | stover<br>Corn |          |                                           |          |     |
| Liver | stover<br>Corn | Negative | morphogenesis of neurites                 | 6.45E-09 | 158 |
| Liver | stover<br>Corn | Negative | ubiquitination of protein                 | 6.60E-09 | 129 |
| Liver | stover<br>Corn | Negative | endothelial cell development              | 8.37E-09 | 136 |
| Liver | stover<br>Corn | Negative | cell death of cervical cancer cell lines  | 8.46E-09 | 135 |
| Liver | stover<br>Corn | Negative | development of lymphatic system component | 8.46E-09 | 121 |
| Liver | stover<br>Corn | Negative | differentiation of connective tissue      | 9.27E-09 | 258 |
| Liver | stover<br>Corn | Negative | chemotaxis of cells                       | 9.73E-09 | 193 |
| Liver | stover<br>Corn | Negative | ubiquitination                            | 1.08E-08 | 130 |
| Liver | stover<br>Corn | Negative | cell death of blood cells                 | 1.15E-08 | 246 |
| Liver | stover<br>Corn | Negative | quantity of connective tissue             | 1.19E-08 | 217 |
| Liver | stover<br>Corn | Negative | growth of embryonic tissue                | 1.21E-08 | 109 |
| Liver | stover<br>Corn | Negative | degeneration of nervous system            | 1.22E-08 | 113 |
| Liver | stover<br>Corn | Negative | neuronal cell death                       | 1.24E-08 | 242 |
| Liver | stover<br>Corn | Negative | migration of tumor cell lines             | 1.24E-08 | 250 |
| Liver | stover<br>Corn | Negative | Lymphocyte homeostasis                    | 1.42E-08 | 198 |
| Liver | stover<br>Corn | Negative | size of embryo                            | 1.54E-08 | 136 |
| Liver | stover<br>Corn | Negative | homeostasis of leukocytes                 | 1.56E-08 | 201 |
| Liver | stover<br>Corn | Negative | quantity of antigen presenting cells      | 1.74E-08 | 109 |
| Liver | stover<br>Corn | Negative | learning                                  | 1.84E-08 | 156 |
| Liver | stover<br>Corn | Negative | seizure disorder                          | 1.94E-08 | 173 |
| Liver | stover         | Negative | formation of skin                         | 1.94E-08 | 139 |
| Liver | Corn           | Negative | formation of cells                        | 1.94E-08 | 335 |

|       |                |          |                                          |          |      |
|-------|----------------|----------|------------------------------------------|----------|------|
|       | stover<br>Corn |          |                                          |          |      |
| Liver | stover<br>Corn | Negative | cellular degradation                     | 2.39E-08 | 101  |
| Liver | stover<br>Corn | Negative | synthesis of lipid                       | 2.43E-08 | 251  |
| Liver | stover<br>Corn | Negative | neurological signs                       | 2.43E-08 | 231  |
| Liver | stover<br>Corn | Negative | apoptosis of connective tissue cells     | 2.43E-08 | 115  |
| Liver | stover<br>Corn | Negative | dyskinesia                               | 2.43E-08 | 220  |
| Liver | stover<br>Corn | Negative | abnormal morphology of heart             | 2.63E-08 | 144  |
| Liver | stover<br>Corn | Negative | concentration of lipid                   | 2.72E-08 | 281  |
| Liver | stover<br>Corn | Negative | proliferation of embryonic cells         | 2.75E-08 | 99   |
| Liver | stover<br>Corn | Negative | gastrointestinal tract cancer            | 3.07E-08 | 1518 |
| Liver | stover<br>Corn | Negative | Huntington's Disease                     | 3.07E-08 | 206  |
| Liver | stover<br>Corn | Negative | cell death of immune cells               | 3.29E-08 | 233  |
| Liver | stover<br>Corn | Negative | cell spreading                           | 3.51E-08 | 108  |
| Liver | stover<br>Corn | Negative | perinatal death                          | 3.59E-08 | 212  |
| Liver | stover<br>Corn | Negative | differentiation of tumor cell lines      | 3.69E-08 | 142  |
| Liver | stover<br>Corn | Negative | abnormal morphology of embryonic tissue  | 3.70E-08 | 197  |
| Liver | stover<br>Corn | Negative | Gastrointestinal Tract Cancer and Tumors | 3.92E-08 | 1540 |
| Liver | stover<br>Corn | Negative | cell movement of mononuclear leukocytes  | 4.23E-08 | 169  |
| Liver | stover<br>Corn | Negative | morphology of lymphatic system component | 4.39E-08 | 154  |
| Liver | stover<br>Corn | Negative | colony formation                         | 4.45E-08 | 193  |
| Liver | stover<br>Corn | Negative | differentiation of blood cells           | 4.45E-08 | 290  |
| Liver | stover         | Negative | T cell development                       | 4.49E-08 | 182  |
| Liver | Corn           | Negative | degeneration of neurons                  | 4.51E-08 | 95   |



|       |                |          |                                      |          |     |
|-------|----------------|----------|--------------------------------------|----------|-----|
|       | stover<br>Corn |          |                                      |          |     |
| Liver | stover<br>Corn | Negative | sprouting                            | 4.51E-08 | 144 |
| Liver | stover<br>Corn | Negative | development of blood cells           | 4.57E-08 | 230 |
| Liver | stover<br>Corn | Negative | differentiation of epithelial tissue | 5.05E-08 | 135 |
| Liver | stover<br>Corn | Negative | differentiation of leukocytes        | 5.05E-08 | 236 |
| Liver | stover<br>Corn | Negative | neonatal death                       | 5.67E-08 | 161 |
| Liver | stover<br>Corn | Negative | function of cardiovascular system    | 6.27E-08 | 138 |
| Liver | stover<br>Corn | Negative | formation of muscle                  | 6.27E-08 | 147 |
| Liver | stover<br>Corn | Negative | development of leukocytes            | 6.27E-08 | 209 |
| Liver | stover<br>Corn | Negative | morphology of head                   | 6.42E-08 | 299 |
| Liver | stover<br>Corn | Negative | proliferation of smooth muscle cells | 6.76E-08 | 110 |
| Liver | stover<br>Corn | Negative | abnormal morphology of abdomen       | 7.00E-08 | 299 |
| Liver | stover<br>Corn | Negative | infection by Retroviridae            | 7.17E-08 | 250 |
| Liver | stover<br>Corn | Negative | interphase                           | 7.63E-08 | 230 |
| Liver | stover<br>Corn | Negative | function of lymphocytes              | 8.11E-08 | 128 |
| Liver | stover<br>Corn | Negative | apoptosis of fibroblasts             | 8.43E-08 | 87  |
| Liver | stover<br>Corn | Negative | proliferation of fibroblasts         | 8.46E-08 | 132 |
| Liver | stover<br>Corn | Negative | T cell homeostasis                   | 8.88E-08 | 185 |
| Liver | stover<br>Corn | Negative | accumulation of lipid                | 8.97E-08 | 114 |
| Liver | stover<br>Corn | Negative | seizures                             | 9.34E-08 | 147 |
| Liver | stover<br>Corn | Negative | function of muscle                   | 1.04E-07 | 130 |
| Liver | stover         | Negative | quantity of phagocytes               | 1.04E-07 | 155 |
| Liver | Corn           | Negative | cellular infiltration by leukocytes  | 1.07E-07 | 143 |

|       |                |          |                                          |          |     |
|-------|----------------|----------|------------------------------------------|----------|-----|
|       | stover<br>Corn |          |                                          |          |     |
| Liver | stover<br>Corn | Negative | branching of cells                       | 1.13E-07 | 137 |
| Liver | stover<br>Corn | Negative | binding of DNA                           | 1.20E-07 | 186 |
| Liver | stover<br>Corn | Negative | mitosis                                  | 1.22E-07 | 178 |
| Liver | stover<br>Corn | Negative | abnormal morphology of head              | 1.22E-07 | 284 |
| Liver | stover<br>Corn | Negative | cell movement of phagocytes              | 1.22E-07 | 195 |
| Liver | stover<br>Corn | Negative | quantity of macrophages                  | 1.30E-07 | 81  |
| Liver | stover<br>Corn | Negative | apoptosis of epithelial cells            | 1.32E-07 | 109 |
| Liver | stover<br>Corn | Negative | cell death of epithelial cell lines      | 1.33E-07 | 108 |
| Liver | stover<br>Corn | Negative | size of animal                           | 1.41E-07 | 73  |
| Liver | stover<br>Corn | Negative | development of lymphocytes               | 1.44E-07 | 196 |
| Liver | stover<br>Corn | Negative | development of connective tissue         | 1.48E-07 | 137 |
| Liver | stover<br>Corn | Negative | abnormal morphology of nervous system    | 1.50E-07 | 250 |
| Liver | stover<br>Corn | Negative | colony formation of cells                | 1.67E-07 | 176 |
| Liver | stover<br>Corn | Negative | development of mononuclear leukocytes    | 1.71E-07 | 197 |
| Liver | stover<br>Corn | Negative | Hypertrophy                              | 1.71E-07 | 170 |
| Liver | stover<br>Corn | Negative | morphology of muscle                     | 1.81E-07 | 125 |
| Liver | stover<br>Corn | Negative | abnormal morphology of epithelial tissue | 1.95E-07 | 152 |
| Liver | stover<br>Corn | Negative | cell movement of macrophages             | 1.95E-07 | 102 |
| Liver | stover<br>Corn | Negative | infection by lentivirus                  | 2.06E-07 | 246 |
| Liver | stover<br>Corn | Negative | cellular infiltration                    | 2.24E-07 | 158 |
| Liver | stover         | Negative | quantity of B lymphocytes                | 2.24E-07 | 128 |
| Liver | Corn           | Negative | HIV infection                            | 2.39E-07 | 245 |

|       |                |          |                                                 |          |      |
|-------|----------------|----------|-------------------------------------------------|----------|------|
|       | stover<br>Corn |          |                                                 |          |      |
| Liver | stover<br>Corn | Negative | proliferation of T lymphocytes                  | 2.45E-07 | 211  |
| Liver | stover<br>Corn | Negative | differentiation of bone                         | 2.48E-07 | 149  |
| Liver | stover<br>Corn | Negative | formation of lymphatic system component         | 2.97E-07 | 110  |
| Liver | stover<br>Corn | Negative | MAPKKK cascade                                  | 2.97E-07 | 81   |
| Liver | stover<br>Corn | Negative | activation of cells                             | 3.22E-07 | 326  |
| Liver | stover<br>Corn | Negative | cell movement of endothelial cells              | 3.28E-07 | 130  |
| Liver | stover<br>Corn | Negative | apoptosis of pheochromocytoma cell lines        | 3.41E-07 | 42   |
| Liver | stover<br>Corn | Negative | cellular infiltration of cells                  | 3.46E-07 | 144  |
| Liver | stover<br>Corn | Negative | differentiation of bone cells                   | 4.05E-07 | 147  |
| Liver | stover<br>Corn | Negative | hepatocellular carcinoma                        | 4.24E-07 | 1258 |
| Liver | stover<br>Corn | Negative | proliferation of hematopoietic cells            | 4.96E-07 | 97   |
| Liver | stover<br>Corn | Negative | proliferation of hematopoietic progenitor cells | 5.03E-07 | 93   |
| Liver | stover<br>Corn | Negative | growth of lymphatic system component            | 6.14E-07 | 76   |
| Liver | stover<br>Corn | Negative | invasion of tumor cell lines                    | 6.92E-07 | 228  |
| Liver | stover<br>Corn | Negative | benign neoplasia                                | 7.27E-07 | 308  |
| Liver | stover<br>Corn | Negative | engulfment of cells                             | 7.27E-07 | 146  |
| Liver | stover<br>Corn | Negative | apoptosis of blood cells                        | 8.71E-07 | 174  |
| Liver | stover<br>Corn | Negative | infection by HIV-1                              | 9.28E-07 | 210  |
| Liver | stover<br>Corn | Negative | quantity of carbohydrate                        | 9.62E-07 | 181  |
| Liver | stover<br>Corn | Negative | quantity of lymphatic system component          | 9.62E-07 | 136  |
| Liver | stover         | Negative | colon tumor                                     | 1.02E-06 | 1122 |
| Liver | Corn           | Negative | growth of neurites                              | 1.04E-06 | 163  |

|       |                |          |                                           |          |      |
|-------|----------------|----------|-------------------------------------------|----------|------|
|       | stover<br>Corn |          |                                           |          |      |
| Liver | stover<br>Corn | Negative | cellular infiltration by macrophages      | 1.14E-06 | 64   |
| Liver | stover<br>Corn | Negative | formation of lymphoid organ               | 1.17E-06 | 99   |
| Liver | stover<br>Corn | Negative | potentiation of synapse                   | 1.19E-06 | 61   |
| Liver | stover<br>Corn | Negative | adenocarcinoma                            | 1.20E-06 | 1905 |
| Liver | stover<br>Corn | Negative | growth of plasma membrane projections     | 1.25E-06 | 164  |
| Liver | stover<br>Corn | Negative | cell transformation                       | 1.38E-06 | 162  |
| Liver | stover<br>Corn | Negative | gastrointestinal carcinoma                | 1.39E-06 | 1350 |
| Liver | stover<br>Corn | Negative | differentiation of osteoblasts            | 1.51E-06 | 103  |
| Liver | stover<br>Corn | Negative | intestinal tumor                          | 1.56E-06 | 1301 |
| Liver | stover<br>Corn | Negative | development of digestive system           | 1.56E-06 | 137  |
| Liver | stover<br>Corn | Negative | colorectal neoplasia                      | 1.61E-06 | 1297 |
| Liver | stover<br>Corn | Negative | tumorigenesis of intestine                | 1.62E-06 | 1119 |
| Liver | stover<br>Corn | Negative | differentiation of mononuclear leukocytes | 1.66E-06 | 187  |
| Liver | stover<br>Corn | Negative | Organ Degeneration                        | 1.66E-06 | 172  |
| Liver | stover<br>Corn | Negative | inflammatory response                     | 1.66E-06 | 261  |
| Liver | stover<br>Corn | Negative | apoptosis of cervical cancer cell lines   | 1.70E-06 | 104  |
| Liver | stover<br>Corn | Negative | autophagy                                 | 1.73E-06 | 134  |
| Liver | stover<br>Corn | Negative | colon cancer                              | 1.75E-06 | 1113 |
| Liver | stover<br>Corn | Negative | long-term potentiation of synapse         | 1.76E-06 | 60   |
| Liver | stover<br>Corn | Negative | neoplasia of colon                        | 1.76E-06 | 1116 |
| Liver | stover         | Negative | morphology of vessel                      | 1.85E-06 | 112  |
| Liver | Corn           | Negative | abdominal adenocarcinoma                  | 1.93E-06 | 1736 |

|       |                |          |                                           |          |      |
|-------|----------------|----------|-------------------------------------------|----------|------|
|       | stover<br>Corn |          |                                           |          |      |
| Liver | stover<br>Corn | Negative | formation of lung                         | 1.96E-06 | 110  |
| Liver | stover<br>Corn | Negative | morphology of cardiovascular tissue       | 2.01E-06 | 39   |
| Liver | stover<br>Corn | Negative | cell death of tumor                       | 2.04E-06 | 136  |
| Liver | stover<br>Corn | Negative | outgrowth of plasma membrane projections  | 2.12E-06 | 144  |
| Liver | stover<br>Corn | Negative | cell movement of smooth muscle cells      | 2.18E-06 | 64   |
| Liver | stover<br>Corn | Negative | outgrowth of neurites                     | 2.21E-06 | 143  |
| Liver | stover<br>Corn | Negative | morphology of lymphoid organ              | 2.32E-06 | 139  |
| Liver | stover<br>Corn | Negative | proliferation of epithelial cells         | 2.37E-06 | 171  |
| Liver | stover<br>Corn | Negative | colorectal cancer                         | 2.44E-06 | 1278 |
| Liver | stover<br>Corn | Negative | formation of leukocytes                   | 2.61E-06 | 63   |
| Liver | stover<br>Corn | Negative | cell death of pheochromocytoma cell lines | 2.61E-06 | 50   |
| Liver | stover<br>Corn | Negative | necrosis of tumor                         | 2.74E-06 | 135  |
| Liver | stover<br>Corn | Negative | cell movement of fibroblasts              | 2.76E-06 | 71   |
| Liver | stover<br>Corn | Negative | mass of organism                          | 2.89E-06 | 120  |
| Liver | stover<br>Corn | Negative | intestinal cancer                         | 3.03E-06 | 1279 |
| Liver | stover<br>Corn | Negative | liver lesion                              | 3.09E-06 | 1296 |
| Liver | stover<br>Corn | Negative | catabolism of protein                     | 3.09E-06 | 205  |
| Liver | stover<br>Corn | Negative | cell death of mononuclear leukocytes      | 3.20E-06 | 140  |
| Liver | stover<br>Corn | Negative | abnormal morphology of lymphoid organ     | 3.21E-06 | 134  |
| Liver | stover<br>Corn | Negative | liver tumor                               | 3.21E-06 | 1295 |
| Liver | stover         | Negative | cell movement of muscle cells             | 3.27E-06 | 70   |
| Liver | Corn           | Negative | apoptosis of leukocytes                   | 3.38E-06 | 159  |

|       |                |          |                                              |          |      |
|-------|----------------|----------|----------------------------------------------|----------|------|
|       | stover<br>Corn |          |                                              |          |      |
| Liver | stover<br>Corn | Negative | congenital anomaly of musculoskeletal system | 3.38E-06 | 246  |
| Liver | stover<br>Corn | Negative | hepatobiliary system cancer                  | 3.40E-06 | 1292 |
| Liver | stover<br>Corn | Negative | vascularization                              | 3.48E-06 | 88   |
| Liver | stover<br>Corn | Negative | morphology of endothelial tissue             | 3.50E-06 | 37   |
| Liver | stover<br>Corn | Negative | differentiation of epithelial cells          | 3.59E-06 | 113  |
| Liver | stover<br>Corn | Negative | cell movement of lymphocytes                 | 3.71E-06 | 139  |
| Liver | stover<br>Corn | Negative | liver cancer                                 | 3.71E-06 | 1286 |
| Liver | stover<br>Corn | Negative | cell death of lymphocytes                    | 3.72E-06 | 136  |
| Liver | stover<br>Corn | Negative | respiratory system development               | 3.93E-06 | 122  |
| Liver | stover<br>Corn | Negative | branching of neurons                         | 4.05E-06 | 104  |
| Liver | stover<br>Corn | Negative | metabolism of carbohydrate                   | 4.05E-06 | 210  |
| Liver | stover<br>Corn | Negative | migration of smooth muscle cells             | 4.06E-06 | 59   |
| Liver | stover<br>Corn | Negative | transport of carbohydrate                    | 4.17E-06 | 74   |
| Liver | stover<br>Corn | Negative | quantity of interleukin                      | 4.28E-06 | 56   |
| Liver | stover<br>Corn | Negative | branching of neurites                        | 4.35E-06 | 101  |
| Liver | stover<br>Corn | Negative | accumulation of cells                        | 4.50E-06 | 125  |
| Liver | stover<br>Corn | Negative | arthropathy                                  | 4.50E-06 | 311  |
| Liver | stover<br>Corn | Negative | cell movement of antigen presenting cells    | 4.68E-06 | 124  |
| Liver | stover<br>Corn | Negative | cardiogenesis                                | 4.69E-06 | 163  |
| Liver | stover<br>Corn | Negative | arthritis                                    | 4.75E-06 | 306  |
| Liver | stover         | Negative | dysgenesis                                   | 5.05E-06 | 184  |
| Liver | Corn           | Negative | morphology of blood cells                    | 5.05E-06 | 145  |

|       |                |          |                                      |          |     |
|-------|----------------|----------|--------------------------------------|----------|-----|
|       | stover<br>Corn |          |                                      |          |     |
| Liver | stover<br>Corn | Negative | fatty acid metabolism                | 5.33E-06 | 203 |
| Liver | stover<br>Corn | Negative | uptake of monosaccharide             | 5.42E-06 | 98  |
| Liver | stover<br>Corn | Negative | hypertrophy of heart                 | 5.42E-06 | 120 |
| Liver | stover<br>Corn | Negative | I-kappaB kinase/NF-kappaB cascade    | 5.42E-06 | 67  |
| Liver | stover<br>Corn | Negative | development of head                  | 5.46E-06 | 319 |
| Liver | stover<br>Corn | Negative | cellular infiltration of phagocytes  | 5.52E-06 | 68  |
| Liver | stover<br>Corn | Negative | advanced malignant tumor             | 5.77E-06 | 278 |
| Liver | stover<br>Corn | Negative | cell death of cerebral cortex cells  | 5.78E-06 | 85  |
| Liver | stover<br>Corn | Negative | differentiation of muscle cell lines | 5.90E-06 | 63  |
| Liver | stover<br>Corn | Negative | activation of enzyme                 | 5.90E-06 | 136 |
| Liver | stover<br>Corn | Negative | cell death of brain                  | 5.92E-06 | 105 |
| Liver | stover<br>Corn | Negative | abnormal morphology of muscle        | 6.03E-06 | 113 |
| Liver | stover<br>Corn | Negative | migration of muscle cells            | 6.05E-06 | 64  |
| Liver | stover<br>Corn | Negative | Ovarian Cancer and Tumors            | 6.10E-06 | 251 |
| Liver | stover<br>Corn | Negative | synthesis of nitric oxide            | 6.86E-06 | 100 |
| Liver | stover<br>Corn | Negative | apoptosis of epithelial cell lines   | 6.96E-06 | 83  |
| Liver | stover<br>Corn | Negative | apoptosis of hepatocytes             | 6.99E-06 | 53  |
| Liver | stover<br>Corn | Negative | activation of Protein kinase         | 7.10E-06 | 92  |
| Liver | stover<br>Corn | Negative | morphology of central nervous system | 7.10E-06 | 175 |
| Liver | stover<br>Corn | Negative | morphology of respiratory system     | 7.40E-06 | 111 |
| Liver | stover         | Negative | apoptosis of muscle                  | 7.76E-06 | 95  |
| Liver | Corn           | Negative | quantity of protein in blood         | 7.89E-06 | 173 |

|       |                |          |                                                    |          |     |
|-------|----------------|----------|----------------------------------------------------|----------|-----|
|       | stover<br>Corn |          |                                                    |          |     |
| Liver | stover<br>Corn | Negative | movement of vascular endothelial cells             | 8.26E-06 | 69  |
| Liver | stover<br>Corn | Negative | recruitment of antigen presenting cells            | 8.35E-06 | 49  |
| Liver | stover<br>Corn | Negative | cell death of tumor cells                          | 8.62E-06 | 130 |
| Liver | stover<br>Corn | Negative | development of gastrointestinal tract              | 9.05E-06 | 95  |
| Liver | stover<br>Corn | Negative | synthesis of reactive oxygen species               | 9.19E-06 | 164 |
| Liver | stover<br>Corn | Negative | metabolism of nucleotide                           | 9.19E-06 | 151 |
| Liver | stover<br>Corn | Negative | migration of endothelial cells                     | 9.19E-06 | 116 |
| Liver | stover<br>Corn | Negative | cell death of muscle                               | 9.80E-06 | 121 |
| Liver | stover<br>Corn | Negative | metabolism of nucleic acid component or derivative | 1.01E-05 | 176 |
| Liver | stover<br>Corn | Negative | formation of blood cells                           | 1.03E-05 | 74  |
| Liver | stover<br>Corn | Negative | abnormal morphology of respiratory system          | 1.04E-05 | 109 |
| Liver | stover<br>Corn | Negative | apoptosis of muscle cells                          | 1.07E-05 | 94  |
| Liver | stover<br>Corn | Negative | differentiation of epidermal cells                 | 1.09E-05 | 63  |
| Liver | stover<br>Corn | Negative | cell death of brain cells                          | 1.12E-05 | 98  |
| Liver | stover<br>Corn | Negative | morphology of digestive system                     | 1.13E-05 | 192 |
| Liver | stover<br>Corn | Negative | breast or ovarian cancer                           | 1.14E-05 | 590 |
| Liver | stover<br>Corn | Negative | uptake of D-hexose                                 | 1.15E-05 | 82  |
| Liver | stover<br>Corn | Negative | differentiation of lymphocytes                     | 1.18E-05 | 169 |
| Liver | stover<br>Corn | Negative | apoptosis of heart cells                           | 1.22E-05 | 71  |
| Liver | stover<br>Corn | Negative | invasion of tissue                                 | 1.22E-05 | 73  |
| Liver | stover<br>Corn | Negative | cell death of central nervous system cells         | 1.22E-05 | 104 |
| Liver | Corn           | Negative | S phase                                            | 1.23E-05 | 94  |



|       |                |          |                                           |          |      |
|-------|----------------|----------|-------------------------------------------|----------|------|
|       | stover<br>Corn |          |                                           |          |      |
| Liver | stover<br>Corn | Negative | apoptosis of liver                        | 1.26E-05 | 61   |
| Liver | stover<br>Corn | Negative | cell death of breast cancer cell lines    | 1.29E-05 | 117  |
| Liver | stover<br>Corn | Negative | necrosis of muscle                        | 1.29E-05 | 120  |
| Liver | stover<br>Corn | Negative | incidence of tumor                        | 1.32E-05 | 113  |
| Liver | stover<br>Corn | Negative | differentiation of skin                   | 1.43E-05 | 68   |
| Liver | stover<br>Corn | Negative | small GTPase mediated signal transduction | 1.44E-05 | 69   |
| Liver | stover<br>Corn | Negative | differentiation of muscle                 | 1.45E-05 | 107  |
| Liver | stover<br>Corn | Negative | quantity of muscle cells                  | 1.48E-05 | 47   |
| Liver | stover<br>Corn | Negative | quantity of immunoglobulin                | 1.56E-05 | 105  |
| Liver | stover<br>Corn | Negative | angiogenesis of tumor                     | 1.61E-05 | 48   |
| Liver | stover<br>Corn | Negative | plasticity of synapse                     | 1.61E-05 | 48   |
| Liver | stover<br>Corn | Negative | cell death of kidney cell lines           | 1.66E-05 | 107  |
| Liver | stover<br>Corn | Negative | uptake of carbohydrate                    | 1.66E-05 | 103  |
| Liver | stover<br>Corn | Negative | differentiation of keratinocytes          | 1.74E-05 | 58   |
| Liver | stover<br>Corn | Negative | gonadal tumor                             | 1.74E-05 | 267  |
| Liver | stover<br>Corn | Negative | production of protein                     | 1.80E-05 | 115  |
| Liver | stover<br>Corn | Negative | outgrowth of cells                        | 1.80E-05 | 148  |
| Liver | stover<br>Corn | Negative | cell death of muscle cells                | 1.88E-05 | 117  |
| Liver | stover<br>Corn | Negative | cell movement of connective tissue cells  | 1.89E-05 | 81   |
| Liver | stover<br>Corn | Negative | abdominal carcinoma                       | 1.90E-05 | 1747 |
| Liver | stover         | Negative | memory                                    | 2.03E-05 | 92   |
| Liver | Corn           | Negative | shape change of fibroblast cell lines     | 2.04E-05 | 38   |

|       |                |          |                                           |          |      |
|-------|----------------|----------|-------------------------------------------|----------|------|
|       | stover<br>Corn |          |                                           |          |      |
| Liver | stover<br>Corn | Negative | quantity of lymphoid organ                | 2.07E-05 | 108  |
| Liver | stover<br>Corn | Negative | cell viability of connective tissue cells | 2.08E-05 | 52   |
| Liver | stover<br>Corn | Negative | recruitment of macrophages                | 2.20E-05 | 43   |
| Liver | stover<br>Corn | Negative | hypertrophy of cells                      | 2.26E-05 | 102  |
| Liver | stover<br>Corn | Negative | cell death of kidney cells                | 2.29E-05 | 121  |
| Liver | stover<br>Corn | Negative | cell death of liver                       | 2.35E-05 | 86   |
| Liver | stover<br>Corn | Negative | apoptosis of lymphocytes                  | 2.39E-05 | 120  |
| Liver | stover<br>Corn | Negative | morphology of endothelial cells           | 2.40E-05 | 28   |
| Liver | stover<br>Corn | Negative | metabolism of reactive oxygen species     | 2.44E-05 | 168  |
| Liver | stover<br>Corn | Negative | cell death of liver cells                 | 2.45E-05 | 72   |
| Liver | stover<br>Corn | Negative | activation of blood cells                 | 2.45E-05 | 244  |
| Liver | stover<br>Corn | Negative | colorectal carcinoma                      | 2.46E-05 | 1100 |
| Liver | stover<br>Corn | Negative | autophagy of cells                        | 2.53E-05 | 94   |
| Liver | stover<br>Corn | Negative | production of antibody                    | 2.57E-05 | 109  |
| Liver | stover<br>Corn | Negative | uptake of D-glucose                       | 2.63E-05 | 80   |
| Liver | stover<br>Corn | Negative | development of body axis                  | 2.64E-05 | 335  |
| Liver | stover<br>Corn | Negative | growth of lesion                          | 2.65E-05 | 259  |
| Liver | stover<br>Corn | Negative | quantity of IL-6 in blood                 | 2.68E-05 | 36   |
| Liver | stover<br>Corn | Negative | homing of blood cells                     | 2.70E-05 | 130  |
| Liver | stover<br>Corn | Negative | quantity of metal ion                     | 2.71E-05 | 150  |
| Liver | stover         | Negative | female genital tract serous cancer        | 2.75E-05 | 132  |
| Liver | Corn           | Negative | tumorigenesis of gonad                    | 2.79E-05 | 262  |

|       |                |          |                                         |          |      |
|-------|----------------|----------|-----------------------------------------|----------|------|
|       | stover<br>Corn |          |                                         |          |      |
| Liver | stover<br>Corn | Negative | quantity of epithelial tissue           | 2.91E-05 | 66   |
| Liver | stover<br>Corn | Negative | apoptosis of mononuclear leukocytes     | 2.94E-05 | 123  |
| Liver | stover<br>Corn | Negative | Bleeding                                | 2.96E-05 | 144  |
| Liver | stover<br>Corn | Negative | gastrointestinal adenocarcinoma         | 3.17E-05 | 1259 |
| Liver | stover<br>Corn | Negative | homing of leukocytes                    | 3.17E-05 | 129  |
| Liver | stover<br>Corn | Negative | necrosis of liver                       | 3.21E-05 | 85   |
| Liver | stover<br>Corn | Negative | growth of tumor                         | 3.22E-05 | 258  |
| Liver | stover<br>Corn | Negative | apoptosis of liver cells                | 3.23E-05 | 59   |
| Liver | stover<br>Corn | Negative | necrosis of kidney                      | 3.38E-05 | 125  |
| Liver | stover<br>Corn | Negative | abnormal morphology of digestive system | 3.38E-05 | 181  |
| Liver | stover<br>Corn | Negative | internalization of cells                | 3.38E-05 | 62   |
| Liver | stover<br>Corn | Negative | growth of lymphoid organ                | 3.44E-05 | 64   |
| Liver | stover<br>Corn | Negative | apoptosis of cardiomyocytes             | 3.46E-05 | 68   |
| Liver | stover<br>Corn | Negative | morphology of neuroglia                 | 3.60E-05 | 46   |
| Liver | stover<br>Corn | Negative | morphology of blood vessel              | 3.68E-05 | 99   |
| Liver | stover<br>Corn | Negative | accumulation of blood cells             | 3.81E-05 | 98   |
| Liver | stover<br>Corn | Negative | cell death of hepatocytes               | 3.86E-05 | 58   |
| Liver | stover<br>Corn | Negative | engulfment of leukocytes                | 4.00E-05 | 60   |
| Liver | stover<br>Corn | Negative | hyperplasia of tissue                   | 4.07E-05 | 71   |
| Liver | stover<br>Corn | Negative | migration of vascular endothelial cells | 4.09E-05 | 62   |
| Liver | stover         | Negative | morphology of leukocytes                | 4.11E-05 | 118  |
| Liver | Corn           | Negative | cytostasis                              | 4.20E-05 | 99   |

|       |                |          |                                       |          |     |
|-------|----------------|----------|---------------------------------------|----------|-----|
|       | stover<br>Corn |          |                                       |          |     |
| Liver | stover<br>Corn | Negative | expansion of cells                    | 4.35E-05 | 105 |
| Liver | stover<br>Corn | Negative | immune response of cells              | 4.48E-05 | 189 |
| Liver | stover<br>Corn | Negative | quantity of metal                     | 4.72E-05 | 166 |
| Liver | stover<br>Corn | Negative | infection of kidney cell lines        | 4.82E-05 | 99  |
| Liver | stover<br>Corn | Negative | epileptic seizure                     | 4.95E-05 | 62  |
| Liver | stover<br>Corn | Negative | engulfment of blood cells             | 4.97E-05 | 63  |
| Liver | stover<br>Corn | Negative | abnormal morphology of blood vessel   | 5.22E-05 | 93  |
| Liver | stover<br>Corn | Negative | autosomal recessive disease           | 5.27E-05 | 294 |
| Liver | stover<br>Corn | Negative | ovarian cancer                        | 5.28E-05 | 231 |
| Liver | stover<br>Corn | Negative | apoptosis of breast cancer cell lines | 5.28E-05 | 100 |
| Liver | stover<br>Corn | Negative | serous neoplasm                       | 5.32E-05 | 200 |
| Liver | stover<br>Corn | Negative | angiogenesis of lesion                | 5.41E-05 | 49  |
| Liver | stover<br>Corn | Negative | modification of peptide               | 5.52E-05 | 42  |
| Liver | stover<br>Corn | Negative | activation of leukocytes              | 5.61E-05 | 227 |
| Liver | stover<br>Corn | Negative | formation of mononuclear leukocytes   | 5.64E-05 | 50  |
| Liver | stover<br>Corn | Negative | long-term potentiation of brain       | 5.64E-05 | 50  |
| Liver | stover<br>Corn | Negative | transport of monosaccharide           | 5.77E-05 | 59  |
| Liver | stover<br>Corn | Negative | migration of connective tissue cells  | 5.90E-05 | 66  |
| Liver | stover<br>Corn | Negative | infection of embryonic cell lines     | 6.08E-05 | 96  |
| Liver | stover<br>Corn | Negative | infection of epithelial cell lines    | 6.08E-05 | 96  |
| Liver | stover         | Negative | autosomal dominant disease            | 6.08E-05 | 208 |
| Liver | Corn           | Negative | uterine serous papillary cancer       | 6.22E-05 | 82  |

|       |                |          |                                         |          |     |
|-------|----------------|----------|-----------------------------------------|----------|-----|
|       | stover<br>Corn |          |                                         |          |     |
| Liver | stover<br>Corn | Negative | glandular intraepithelial neoplasm      | 6.42E-05 | 48  |
| Liver | stover<br>Corn | Negative | metastasis                              | 6.44E-05 | 245 |
| Liver | stover<br>Corn | Negative | tumorigenesis of malignant tumor        | 6.52E-05 | 94  |
| Liver | stover<br>Corn | Negative | morphology of skeleton                  | 6.68E-05 | 97  |
| Liver | stover<br>Corn | Negative | development of connective tissue cells  | 6.69E-05 | 79  |
| Liver | stover<br>Corn | Negative | hypertrophy of heart cells              | 6.88E-05 | 58  |
| Liver | stover<br>Corn | Negative | formation of thymus gland               | 7.00E-05 | 60  |
| Liver | stover<br>Corn | Negative | Hypoplasia                              | 7.02E-05 | 167 |
| Liver | stover<br>Corn | Negative | cell death of T lymphocytes             | 7.08E-05 | 108 |
| Liver | stover<br>Corn | Negative | dyspnea                                 | 7.17E-05 | 51  |
| Liver | stover<br>Corn | Negative | function of T lymphocytes               | 7.17E-05 | 91  |
| Liver | stover<br>Corn | Negative | prostatic intraepithelial neoplasia     | 7.17E-05 | 46  |
| Liver | stover<br>Corn | Negative | synthesis of nucleotide                 | 7.17E-05 | 123 |
| Liver | stover<br>Corn | Negative | ploidy of cells                         | 7.38E-05 | 52  |
| Liver | stover<br>Corn | Negative | synaptic transmission                   | 7.38E-05 | 115 |
| Liver | stover<br>Corn | Negative | wasting                                 | 7.55E-05 | 40  |
| Liver | stover<br>Corn | Negative | Edema                                   | 7.55E-05 | 117 |
| Liver | stover<br>Corn | Negative | proliferation of lymphatic system cells | 7.61E-05 | 72  |
| Liver | stover<br>Corn | Negative | cell death of heart cells               | 7.87E-05 | 78  |
| Liver | stover<br>Corn | Negative | atrophy of muscle                       | 7.87E-05 | 55  |
| Liver | stover         | Negative | metabolism of glycosphingolipid         | 7.87E-05 | 48  |
| Liver | Corn           | Negative | shape change of tumor cell lines        | 8.11E-05 | 57  |

|       |                |          |                                               |          |     |
|-------|----------------|----------|-----------------------------------------------|----------|-----|
|       | stover<br>Corn |          |                                               |          |     |
| Liver | stover<br>Corn | Negative | cell death of skin                            | 8.20E-05 | 41  |
| Liver | stover<br>Corn | Negative | abnormal morphology of central nervous system | 8.32E-05 | 160 |
| Liver | stover<br>Corn | Negative | abnormal morphology of skeleton               | 8.35E-05 | 94  |
| Liver | stover<br>Corn | Negative | phagocytosis of cells                         | 8.35E-05 | 94  |
| Liver | stover<br>Corn | Negative | Wound                                         | 8.64E-05 | 80  |
| Liver | stover<br>Corn | Negative | cell death of sarcoma cell lines              | 8.64E-05 | 80  |
| Liver | stover<br>Corn | Negative | vascularization of body region                | 8.73E-05 | 51  |
| Liver | stover<br>Corn | Negative | neurotransmission                             | 8.86E-05 | 138 |
| Liver | stover<br>Corn | Negative | weight loss                                   | 8.88E-05 | 84  |
| Liver | stover<br>Corn | Negative | hypersensitive reaction                       | 9.30E-05 | 143 |
| Liver | stover<br>Corn | Negative | morphology of heart ventricle                 | 9.30E-05 | 69  |
| Liver | stover<br>Corn | Negative | function of smooth muscle                     | 9.33E-05 | 37  |
| Liver | stover<br>Corn | Negative | proliferation of vascular endothelial cells   | 9.33E-05 | 54  |
| Liver | stover<br>Corn | Negative | differentiation of muscle cells               | 9.61E-05 | 97  |
| Liver | stover<br>Corn | Negative | abnormal morphology of lymph node             | 9.61E-05 | 56  |
| Liver | stover<br>Corn | Negative | peripheral arterial disease                   | 9.70E-05 | 75  |
| Liver | stover<br>Corn | Negative | morphology of lymph node                      | 9.82E-05 | 59  |
| Liver | stover<br>Corn | Negative | hypertrophy of tissue                         | 9.88E-05 | 89  |
| Liver | stover<br>Corn | Negative | cell death of heart                           | 9.88E-05 | 80  |
| Liver | stover<br>Corn | Negative | differentiation of embryonic cells            | 9.88E-05 | 80  |
| Liver | stover         | Negative | formation of vascular lesion                  | 9.92E-05 | 44  |
| Liver | Corn           | Negative | quantity of muscle                            | 9.96E-05 | 49  |

|       |                |          |                                                  |          |     |
|-------|----------------|----------|--------------------------------------------------|----------|-----|
|       | stover<br>Corn |          |                                                  |          |     |
| Liver | stover<br>Corn | Negative | development of abdomen                           | 9.99E-05 | 189 |
| Liver | stover<br>Corn | Negative | size of cells                                    | 1.01E-04 | 143 |
| Liver | stover<br>Corn | Negative | damage of nervous system                         | 1.01E-04 | 79  |
| Liver | stover<br>Corn | Negative | synthesis of DNA                                 | 1.01E-04 | 139 |
| Liver | stover<br>Corn | Negative | morphology of brain                              | 1.01E-04 | 154 |
| Liver | stover<br>Corn | Negative | gliosis                                          | 1.02E-04 | 50  |
| Liver | stover<br>Corn | Negative | Encephalitis                                     | 1.03E-04 | 101 |
| Liver | stover<br>Corn | Negative | export of molecule                               | 1.03E-04 | 101 |
| Liver | stover<br>Corn | Negative | formation of embryonic tissue                    | 1.03E-04 | 101 |
| Liver | stover<br>Corn | Negative | synthesis of ceramide                            | 1.07E-04 | 30  |
| Liver | stover<br>Corn | Negative | morphology of bone                               | 1.08E-04 | 149 |
| Liver | stover<br>Corn | Negative | concentration of fatty acid                      | 1.11E-04 | 96  |
| Liver | stover<br>Corn | Negative | differentiation of phagocytes                    | 1.11E-04 | 85  |
| Liver | stover<br>Corn | Negative | secretion of molecule                            | 1.15E-04 | 180 |
| Liver | stover<br>Corn | Negative | cell surface receptor linked signal transduction | 1.17E-04 | 101 |
| Liver | stover<br>Corn | Negative | inflammation of central nervous system           | 1.21E-04 | 103 |
| Liver | stover<br>Corn | Negative | development of epithelial cells                  | 1.22E-04 | 49  |
| Liver | stover<br>Corn | Negative | Fibrosis                                         | 1.23E-04 | 174 |
| Liver | stover<br>Corn | Negative | cell death of leukemia cell lines                | 1.23E-04 | 108 |
| Liver | stover<br>Corn | Negative | cachexia                                         | 1.25E-04 | 35  |
| Liver | stover         | Negative | migration of mononuclear leukocytes              | 1.26E-04 | 124 |
| Liver | Corn           | Negative | transformation of fibroblast cell lines          | 1.27E-04 | 89  |

|               |         |          |                                   |          |      |  |
|---------------|---------|----------|-----------------------------------|----------|------|--|
|               | stover  |          |                                   |          |      |  |
|               | Corn    |          |                                   |          |      |  |
| Liver         | stover  | Negative | apoptosis of carcinoma cell lines | 1.27E-04 | 85   |  |
|               | Corn    |          |                                   |          |      |  |
| Liver         | stover  | Negative | Lymphocyte migration              | 1.34E-04 | 116  |  |
| Mammary gland | Alfalfa | Positive | proliferation of cells            | 9.69E-71 | 1966 |  |
| Mammary gland | Alfalfa | Positive | cancer                            | 8.33E-59 | 4871 |  |
| Mammary gland | Alfalfa | Positive | malignant solid tumor             | 2.90E-57 | 4814 |  |
| Mammary gland | Alfalfa | Positive | cell death                        | 4.59E-52 | 1734 |  |
| Mammary gland | Alfalfa | Positive | organismal death                  | 2.39E-46 | 1287 |  |
| Mammary gland | Alfalfa | Positive | morbidity or mortality            | 6.29E-46 | 1300 |  |
| Mammary gland | Alfalfa | Positive | apoptosis                         | 8.55E-45 | 1393 |  |
| Mammary gland | Alfalfa | Positive | necrosis                          | 7.00E-43 | 1353 |  |
| Mammary gland | Alfalfa | Positive | morphology of cells               | 6.28E-41 | 1059 |  |
| Mammary gland | Alfalfa | Positive | organization of cytoplasm         | 1.34E-38 | 857  |  |
| Mammary gland | Alfalfa | Positive | tumorigenesis of tissue           | 2.42E-32 | 4028 |  |
| Mammary gland | Alfalfa | Positive | cell movement                     | 5.43E-32 | 1106 |  |
| Mammary gland | Alfalfa | Positive | organization of cytoskeleton      | 1.10E-31 | 767  |  |
| Mammary gland | Alfalfa | Positive | neoplasia of epithelial tissue    | 2.17E-31 | 3962 |  |
| Mammary gland | Alfalfa | Positive | epithelial cancer                 | 6.14E-31 | 3925 |  |
| Mammary gland | Alfalfa | Positive | abdominal neoplasm                | 4.35E-29 | 3921 |  |
| Mammary gland | Alfalfa | Positive | migration of cells                | 2.66E-27 | 983  |  |
| Mammary gland | Alfalfa | Positive | abdominal cancer                  | 4.02E-27 | 3867 |  |
| Mammary gland | Alfalfa | Positive | quantity of cells                 | 6.23E-27 | 920  |  |
| Mammary gland | Alfalfa | Positive | transport of molecule             | 6.61E-26 | 844  |  |



|         |         |          |                                       |          |      |
|---------|---------|----------|---------------------------------------|----------|------|
| gland   | hay     |          |                                       |          |      |
| Mammary | Alfalfa |          |                                       |          |      |
| gland   | hay     | Positive | microtubule dynamics                  | 1.43E-25 | 644  |
| Mammary | Alfalfa |          |                                       |          |      |
| gland   | hay     | Positive | cellular homeostasis                  | 1.43E-25 | 801  |
| Mammary | Alfalfa |          |                                       |          |      |
| gland   | hay     | Positive | cell death of tumor cell lines        | 2.27E-25 | 802  |
| Mammary | Alfalfa |          |                                       |          |      |
| gland   | hay     | Positive | cell survival                         | 3.12E-25 | 740  |
| Mammary | Alfalfa |          |                                       |          |      |
| gland   | hay     | Positive | differentiation of cells              | 1.60E-24 | 1125 |
| Mammary | Alfalfa |          |                                       |          |      |
| gland   | hay     | Positive | transcription                         | 2.19E-24 | 1010 |
| Mammary | Alfalfa |          |                                       |          |      |
| gland   | hay     | Positive | abnormal morphology of cells          | 2.34E-24 | 677  |
| Mammary | Alfalfa |          |                                       |          |      |
| gland   | hay     | Positive | cell viability                        | 4.77E-24 | 692  |
| Mammary | Alfalfa |          |                                       |          |      |
| gland   | hay     | Positive | cell death of connective tissue cells | 1.46E-23 | 354  |
| Mammary | Alfalfa |          |                                       |          |      |
| gland   | hay     | Positive | expression of RNA                     | 1.73E-23 | 1073 |
| Mammary | Alfalfa |          |                                       |          |      |
| gland   | hay     | Positive | morphology of cardiovascular system   | 2.11E-23 | 362  |
| Mammary | Alfalfa |          |                                       |          |      |
| gland   | hay     | Positive | morphology of body cavity             | 2.33E-23 | 640  |
| Mammary | Alfalfa |          |                                       |          |      |
| gland   | hay     | Positive | abnormal morphology of body cavity    | 5.04E-23 | 614  |
| Mammary | Alfalfa |          |                                       |          |      |
| gland   | hay     | Positive | angiogenesis                          | 1.22E-22 | 501  |
| Mammary | Alfalfa |          |                                       |          |      |
| gland   | hay     | Positive | transcription of RNA                  | 1.42E-22 | 939  |
| Mammary | Alfalfa |          |                                       |          |      |
| gland   | hay     | Positive | digestive organ tumor                 | 6.83E-22 | 3374 |
| Mammary | Alfalfa |          |                                       |          |      |
| gland   | hay     | Positive | digestive system cancer               | 1.59E-21 | 3342 |
| Mammary | Alfalfa |          |                                       |          |      |
| gland   | hay     | Positive | proliferation of tumor cell lines     | 1.80E-21 | 794  |
| Mammary | Alfalfa |          |                                       |          |      |
| gland   | hay     | Positive | apoptosis of tumor cell lines         | 1.23E-20 | 636  |
| Mammary | Alfalfa |          |                                       |          |      |
| gland   | hay     | Positive | Viral Infection                       | 1.28E-20 | 819  |
| Mammary | Alfalfa |          |                                       |          |      |
| gland   | hay     | Positive | Movement Disorders                    | 2.74E-20 | 564  |
| Mammary | Alfalfa | Positive | vasculogenesis                        | 2.74E-20 | 410  |

|         |         |          |                                              |          |     |
|---------|---------|----------|----------------------------------------------|----------|-----|
| gland   | hay     |          |                                              |          |     |
| Mammary | Alfalfa |          |                                              |          |     |
| gland   | hay     | Positive | concentration of lipid                       | 5.34E-20 | 445 |
| Mammary | Alfalfa |          |                                              |          |     |
| gland   | hay     | Positive | abnormal morphology of thoracic cavity       | 9.73E-20 | 334 |
| Mammary | Alfalfa |          |                                              |          |     |
| gland   | hay     | Positive | proliferation of connective tissue cells     | 2.25E-19 | 336 |
| Mammary | Alfalfa |          |                                              |          |     |
| gland   | hay     | Positive | abnormal morphology of cardiovascular system | 2.89E-19 | 323 |
| Mammary | Alfalfa |          |                                              |          |     |
| gland   | hay     | Positive | cell cycle progression                       | 9.05E-19 | 552 |
| Mammary | Alfalfa |          |                                              |          |     |
| gland   | hay     | Positive | invasion of cells                            | 1.22E-18 | 468 |
| Mammary | Alfalfa |          |                                              |          |     |
| gland   | hay     | Positive | cell movement of tumor cell lines            | 1.45E-18 | 459 |
| Mammary | Alfalfa |          |                                              |          |     |
| gland   | hay     | Positive | cell viability of tumor cell lines           | 1.53E-18 | 424 |
| Mammary | Alfalfa |          |                                              |          |     |
| gland   | hay     | Positive | size of body                                 | 2.09E-18 | 458 |
| Mammary | Alfalfa |          |                                              |          |     |
| gland   | hay     | Positive | quantity of blood cells                      | 2.28E-18 | 541 |
| Mammary | Alfalfa |          |                                              |          |     |
| gland   | hay     | Positive | formation of cellular protrusions            | 2.88E-18 | 482 |
| Mammary | Alfalfa |          |                                              |          |     |
| gland   | hay     | Positive | development of body trunk                    | 7.62E-18 | 580 |
| Mammary | Alfalfa |          |                                              |          |     |
| gland   | hay     | Positive | quantity of leukocytes                       | 1.05E-17 | 486 |
| Mammary | Alfalfa |          |                                              |          |     |
| gland   | hay     | Positive | ubiquitination                               | 1.48E-17 | 201 |
| Mammary | Alfalfa |          |                                              |          |     |
| gland   | hay     | Positive | cell death of fibroblast cell lines          | 1.60E-17 | 247 |
| Mammary | Alfalfa |          |                                              |          |     |
| gland   | hay     | Positive | growth of connective tissue                  | 2.99E-17 | 354 |
| Mammary | Alfalfa |          |                                              |          |     |
| gland   | hay     | Positive | ubiquitination of protein                    | 5.11E-17 | 197 |
| Mammary | Alfalfa |          |                                              |          |     |
| gland   | hay     | Positive | organization of organelle                    | 8.14E-17 | 301 |
| Mammary | Alfalfa |          |                                              |          |     |
| gland   | hay     | Positive | autosomal recessive disease                  | 1.30E-16 | 484 |
| Mammary | Alfalfa |          |                                              |          |     |
| gland   | hay     | Positive | synthesis of lipid                           | 1.91E-16 | 385 |
| Mammary | Alfalfa |          |                                              |          |     |
| gland   | hay     | Positive | growth of organism                           | 3.54E-16 | 442 |
| Mammary | Alfalfa | Positive | quantity of connective tissue                | 6.77E-16 | 329 |

|         |         |          |                                    |          |     |
|---------|---------|----------|------------------------------------|----------|-----|
| gland   | hay     |          |                                    |          |     |
| Mammary | Alfalfa |          |                                    |          |     |
| gland   | hay     | Positive | migration of tumor cell lines      | 1.41E-15 | 378 |
| Mammary | Alfalfa |          |                                    |          |     |
| gland   | hay     | Positive | colony formation                   | 1.99E-15 | 295 |
| Mammary | Alfalfa |          |                                    |          |     |
| gland   | hay     | Positive | colony formation of cells          | 2.03E-15 | 273 |
| Mammary | Alfalfa |          |                                    |          |     |
| gland   | hay     | Positive | phosphorylation of protein         | 3.81E-15 | 390 |
| Mammary | Alfalfa |          |                                    |          |     |
| gland   | hay     | Positive | apoptosis of fibroblast cell lines | 4.81E-15 | 190 |
| Mammary | Alfalfa |          |                                    |          |     |
| gland   | hay     | Positive | invasion of tumor cell lines       | 4.98E-15 | 356 |
| Mammary | Alfalfa |          |                                    |          |     |
| gland   | hay     | Positive | necrosis of epithelial tissue      | 4.99E-15 | 319 |
| Mammary | Alfalfa |          |                                    |          |     |
| gland   | hay     | Positive | quantity of lymphocytes            | 5.29E-15 | 376 |
| Mammary | Alfalfa |          |                                    |          |     |
| gland   | hay     | Positive | quantity of mononuclear leukocytes | 6.42E-15 | 389 |
| Mammary | Alfalfa |          |                                    |          |     |
| gland   | hay     | Positive | development of vasculature         | 1.34E-14 | 234 |
| Mammary | Alfalfa |          |                                    |          |     |
| gland   | hay     | Positive | development of cytoplasm           | 2.00E-14 | 255 |
| Mammary | Alfalfa |          |                                    |          |     |
| gland   | hay     | Positive | cell death of epithelial cells     | 2.12E-14 | 272 |
| Mammary | Alfalfa |          |                                    |          |     |
| gland   | hay     | Positive | disorder of basal ganglia          | 3.30E-14 | 401 |
| Mammary | Alfalfa |          |                                    |          |     |
| gland   | hay     | Positive | abnormal morphology of abdomen     | 4.20E-14 | 452 |
| Mammary | Alfalfa |          |                                    |          |     |
| gland   | hay     | Positive | function of leukocytes             | 6.44E-14 | 290 |
| Mammary | Alfalfa |          |                                    |          |     |
| gland   | hay     | Positive | neuromuscular disease              | 6.67E-14 | 454 |
| Mammary | Alfalfa |          |                                    |          |     |
| gland   | hay     | Positive | neuronal cell death                | 7.52E-14 | 359 |
| Mammary | Alfalfa |          |                                    |          |     |
| gland   | hay     | Positive | transactivation                    | 1.04E-13 | 309 |
| Mammary | Alfalfa |          |                                    |          |     |
| gland   | hay     | Positive | growth of epithelial tissue        | 1.61E-13 | 357 |
| Mammary | Alfalfa |          |                                    |          |     |
| gland   | hay     | Positive | growth of muscle tissue            | 1.83E-13 | 208 |
| Mammary | Alfalfa |          |                                    |          |     |
| gland   | hay     | Positive | morphology of heart                | 1.85E-13 | 224 |
| Mammary | Alfalfa | Positive | formation of cells                 | 1.88E-13 | 498 |

|         |         |          |                                          |          |      |
|---------|---------|----------|------------------------------------------|----------|------|
| gland   | hay     |          |                                          |          |      |
| Mammary | Alfalfa |          |                                          |          |      |
| gland   | hay     | Positive | transcription of DNA                     | 2.28E-13 | 745  |
| Mammary | Alfalfa |          |                                          |          |      |
| gland   | hay     | Positive | proliferation of muscle cells            | 3.64E-13 | 206  |
| Mammary | Alfalfa |          |                                          |          |      |
| gland   | hay     | Positive | morphology of connective tissue          | 3.69E-13 | 250  |
| Mammary | Alfalfa |          |                                          |          |      |
| gland   | hay     | Positive | proliferation of smooth muscle cells     | 5.04E-13 | 163  |
| Mammary | Alfalfa |          |                                          |          |      |
| gland   | hay     | Positive | abdominal adenocarcinoma                 | 5.11E-13 | 2632 |
| Mammary | Alfalfa |          |                                          |          |      |
| gland   | hay     | Positive | benign neoplasia                         | 6.45E-13 | 469  |
| Mammary | Alfalfa |          |                                          |          |      |
| gland   | hay     | Positive | interphase                               | 6.89E-13 | 343  |
| Mammary | Alfalfa |          |                                          |          |      |
| gland   | hay     | Positive | cell transformation                      | 7.03E-13 | 249  |
| Mammary | Alfalfa |          |                                          |          |      |
| gland   | hay     | Positive | adenocarcinoma                           | 8.66E-13 | 2880 |
| Mammary | Alfalfa |          |                                          |          |      |
| gland   | hay     | Positive | cell death of blood cells                | 9.33E-13 | 360  |
| Mammary | Alfalfa |          |                                          |          |      |
| gland   | hay     | Positive | function of blood cells                  | 1.11E-12 | 309  |
| Mammary | Alfalfa |          |                                          |          |      |
| gland   | hay     | Positive | protein kinase cascade                   | 1.23E-12 | 229  |
| Mammary | Alfalfa |          |                                          |          |      |
| gland   | hay     | Positive | Growth Failure                           | 3.05E-12 | 313  |
| Mammary | Alfalfa |          |                                          |          |      |
| gland   | hay     | Positive | proliferation of neuronal cells          | 3.54E-12 | 302  |
| Mammary | Alfalfa |          |                                          |          |      |
| gland   | hay     | Positive | activation of cells                      | 4.08E-12 | 489  |
| Mammary | Alfalfa |          |                                          |          |      |
| gland   | hay     | Positive | development of blood cells               | 4.29E-12 | 338  |
| Mammary | Alfalfa |          |                                          |          |      |
| gland   | hay     | Positive | cell movement of blood cells             | 6.22E-12 | 441  |
| Mammary | Alfalfa |          |                                          |          |      |
| gland   | hay     | Positive | migration of blood cells                 | 6.26E-12 | 440  |
| Mammary | Alfalfa |          |                                          |          |      |
| gland   | hay     | Positive | development of leukocytes                | 6.28E-12 | 307  |
| Mammary | Alfalfa |          |                                          |          |      |
| gland   | hay     | Positive | abnormal morphology of heart             | 6.52E-12 | 208  |
| Mammary | Alfalfa |          |                                          |          |      |
| gland   | hay     | Positive | abnormal morphology of epithelial tissue | 7.18E-12 | 225  |
| Mammary | Alfalfa | Positive | leukocyte migration                      | 7.18E-12 | 439  |

|         |         |          |                                            |          |      |
|---------|---------|----------|--------------------------------------------|----------|------|
| gland   | hay     |          |                                            |          |      |
| Mammary | Alfalfa |          |                                            |          |      |
| gland   | hay     | Positive | metabolism of carbohydrate                 | 7.39E-12 | 322  |
| Mammary | Alfalfa |          |                                            |          |      |
| gland   | hay     | Positive | cell death of immune cells                 | 8.32E-12 | 340  |
| Mammary | Alfalfa |          |                                            |          |      |
| gland   | hay     | Positive | proliferation of blood cells               | 8.77E-12 | 425  |
| Mammary | Alfalfa |          |                                            |          |      |
| gland   | hay     | Positive | formation of cytoskeleton                  | 8.77E-12 | 204  |
| Mammary | Alfalfa |          |                                            |          |      |
| gland   | hay     | Positive | binding of DNA                             | 8.88E-12 | 274  |
| Mammary | Alfalfa |          |                                            |          |      |
| gland   | hay     | Positive | cell death of T lymphocytes                | 8.92E-12 | 174  |
| Mammary | Alfalfa |          |                                            |          |      |
| gland   | hay     | Positive | fibrogenesis                               | 9.64E-12 | 221  |
| Mammary | Alfalfa |          |                                            |          |      |
| gland   | hay     | Positive | quantity of T lymphocytes                  | 1.39E-11 | 280  |
| Mammary | Alfalfa |          |                                            |          |      |
| gland   | hay     | Positive | differentiation of connective tissue cells | 1.41E-11 | 331  |
| Mammary | Alfalfa |          |                                            |          |      |
| gland   | hay     | Positive | abnormal morphology of embryonic tissue    | 1.41E-11 | 286  |
| Mammary | Alfalfa |          |                                            |          |      |
| gland   | hay     | Positive | replication of RNA virus                   | 1.47E-11 | 266  |
| Mammary | Alfalfa |          |                                            |          |      |
| gland   | hay     | Positive | synthesis of DNA                           | 1.60E-11 | 223  |
| Mammary | Alfalfa |          |                                            |          |      |
| gland   | hay     | Positive | cell death of epithelial cell lines        | 1.95E-11 | 157  |
| Mammary | Alfalfa |          |                                            |          |      |
| gland   | hay     | Positive | dyskinesia                                 | 2.08E-11 | 318  |
| Mammary | Alfalfa |          |                                            |          |      |
| gland   | hay     | Positive | degeneration of nervous system             | 2.25E-11 | 159  |
| Mammary | Alfalfa |          |                                            |          |      |
| gland   | hay     | Positive | neurological signs                         | 2.29E-11 | 334  |
| Mammary | Alfalfa |          |                                            |          |      |
| gland   | hay     | Positive | transactivation of RNA                     | 2.42E-11 | 283  |
| Mammary | Alfalfa |          |                                            |          |      |
| gland   | hay     | Positive | cell death of lymphocytes                  | 2.44E-11 | 207  |
| Mammary | Alfalfa |          |                                            |          |      |
| gland   | hay     | Positive | fatty acid metabolism                      | 2.46E-11 | 310  |
| Mammary | Alfalfa |          |                                            |          |      |
| gland   | hay     | Positive | proliferation of fibroblasts               | 2.73E-11 | 191  |
| Mammary | Alfalfa |          |                                            |          |      |
| gland   | hay     | Positive | genital tumor                              | 2.84E-11 | 1822 |
| Mammary | Alfalfa | Positive | apoptosis of connective tissue cells       | 2.88E-11 | 163  |

|         |         |          |                                              |          |      |
|---------|---------|----------|----------------------------------------------|----------|------|
| gland   | hay     |          |                                              |          |      |
| Mammary | Alfalfa |          |                                              |          |      |
| gland   | hay     | Positive | behavior                                     | 3.24E-11 | 489  |
| Mammary | Alfalfa |          |                                              |          |      |
| gland   | hay     | Positive | breast or colorectal cancer                  | 3.43E-11 | 2216 |
| Mammary | Alfalfa |          |                                              |          |      |
| gland   | hay     | Positive | Huntington's Disease                         | 3.45E-11 | 297  |
| Mammary | Alfalfa |          |                                              |          |      |
| gland   | hay     | Positive | chorea                                       | 3.45E-11 | 298  |
| Mammary | Alfalfa |          |                                              |          |      |
| gland   | hay     | Positive | cell death of mononuclear leukocytes         | 3.45E-11 | 212  |
| Mammary | Alfalfa |          |                                              |          |      |
| gland   | hay     | Positive | Organ Degeneration                           | 4.24E-11 | 258  |
| Mammary | Alfalfa |          |                                              |          |      |
| gland   | hay     | Positive | apoptosis of blood cells                     | 4.25E-11 | 259  |
| Mammary | Alfalfa |          |                                              |          |      |
| gland   | hay     | Positive | small GTPase mediated signal transduction    | 4.70E-11 | 107  |
| Mammary | Alfalfa |          |                                              |          |      |
| gland   | hay     | Positive | cell movement of leukocytes                  | 5.46E-11 | 386  |
| Mammary | Alfalfa |          |                                              |          |      |
| gland   | hay     | Positive | development of head                          | 5.97E-11 | 484  |
| Mammary | Alfalfa |          |                                              |          |      |
| gland   | hay     | Positive | abdominal carcinoma                          | 6.26E-11 | 2647 |
| Mammary | Alfalfa |          |                                              |          |      |
| gland   | hay     | Positive | survival of organism                         | 6.70E-11 | 356  |
| Mammary | Alfalfa |          |                                              |          |      |
| gland   | hay     | Positive | formation of filaments                       | 8.32E-11 | 211  |
| Mammary | Alfalfa |          |                                              |          |      |
| gland   | hay     | Positive | replication of virus                         | 8.39E-11 | 289  |
| Mammary | Alfalfa |          |                                              |          |      |
| gland   | hay     | Positive | infection by Retroviridae                    | 8.39E-11 | 363  |
| Mammary | Alfalfa |          |                                              |          |      |
| gland   | hay     | Positive | growth of embryo                             | 8.39E-11 | 249  |
| Mammary | Alfalfa |          |                                              |          |      |
| gland   | hay     | Positive | Neurodegeneration                            | 8.40E-11 | 168  |
| Mammary | Alfalfa |          |                                              |          |      |
| gland   | hay     | Positive | morphology of respiratory system             | 8.84E-11 | 169  |
| Mammary | Alfalfa |          |                                              |          |      |
| gland   | hay     | Positive | mitosis                                      | 8.96E-11 | 258  |
| Mammary | Alfalfa |          |                                              |          |      |
| gland   | hay     | Positive | development of lymphocytes                   | 9.88E-11 | 285  |
| Mammary | Alfalfa |          |                                              |          |      |
| gland   | hay     | Positive | perinatal death                              | 1.14E-10 | 304  |
| Mammary | Alfalfa | Positive | congenital anomaly of musculoskeletal system | 1.20E-10 | 370  |

|         |         |          |                                          |          |      |
|---------|---------|----------|------------------------------------------|----------|------|
| gland   | hay     |          |                                          |          |      |
| Mammary | Alfalfa |          |                                          |          |      |
| gland   | hay     | Positive | development of body axis                 | 1.22E-10 | 514  |
| Mammary | Alfalfa |          |                                          |          |      |
| gland   | hay     | Positive | infection by RNA virus                   | 1.26E-10 | 430  |
| Mammary | Alfalfa |          |                                          |          |      |
| gland   | hay     | Positive | concentration of fatty acid              | 1.28E-10 | 153  |
| Mammary | Alfalfa |          |                                          |          |      |
| gland   | hay     | Positive | morphology of head                       | 1.34E-10 | 434  |
| Mammary | Alfalfa |          |                                          |          |      |
| gland   | hay     | Positive | cell movement of myeloid cells           | 1.39E-10 | 278  |
| Mammary | Alfalfa |          |                                          |          |      |
| gland   | hay     | Positive | infection of cells                       | 1.41E-10 | 398  |
| Mammary | Alfalfa |          |                                          |          |      |
| gland   | hay     | Positive | size of animal                           | 1.54E-10 | 103  |
| Mammary | Alfalfa |          |                                          |          |      |
| gland   | hay     | Positive | development of mononuclear leukocytes    | 1.65E-10 | 286  |
| Mammary | Alfalfa |          |                                          |          |      |
| gland   | hay     | Positive | female genital neoplasm                  | 1.76E-10 | 1606 |
| Mammary | Alfalfa |          |                                          |          |      |
| gland   | hay     | Positive | infection by lentivirus                  | 1.82E-10 | 359  |
| Mammary | Alfalfa |          |                                          |          |      |
| gland   | hay     | Positive | HIV infection                            | 1.83E-10 | 358  |
| Mammary | Alfalfa |          |                                          |          |      |
| gland   | hay     | Positive | morphology of digestive system           | 1.92E-10 | 292  |
| Mammary | Alfalfa |          |                                          |          |      |
| gland   | hay     | Positive | sprouting                                | 1.97E-10 | 204  |
| Mammary | Alfalfa |          |                                          |          |      |
| gland   | hay     | Positive | endocytosis                              | 2.12E-10 | 184  |
| Mammary | Alfalfa |          |                                          |          |      |
| gland   | hay     | Positive | synthesis of fatty acid                  | 2.24E-10 | 168  |
| Mammary | Alfalfa |          |                                          |          |      |
| gland   | hay     | Positive | development of epithelial tissue         | 2.28E-10 | 266  |
| Mammary | Alfalfa |          |                                          |          |      |
| gland   | hay     | Positive | abnormal morphology of digestive system  | 2.30E-10 | 279  |
| Mammary | Alfalfa |          |                                          |          |      |
| gland   | hay     | Positive | growth of plasma membrane projections    | 2.39E-10 | 242  |
| Mammary | Alfalfa |          |                                          |          |      |
| gland   | hay     | Positive | proliferation of immune cells            | 2.59E-10 | 394  |
| Mammary | Alfalfa |          |                                          |          |      |
| gland   | hay     | Positive | morphology of lymphatic system component | 2.60E-10 | 218  |
| Mammary | Alfalfa |          |                                          |          |      |
| gland   | hay     | Positive | morphology of nervous system             | 2.74E-10 | 390  |
| Mammary | Alfalfa | Positive | hypersensitive reaction                  | 2.85E-10 | 224  |

|         |         |          |                                            |          |     |
|---------|---------|----------|--------------------------------------------|----------|-----|
| gland   | hay     |          |                                            |          |     |
| Mammary | Alfalfa |          |                                            |          |     |
| gland   | hay     | Positive | differentiation of connective tissue       | 2.96E-10 | 365 |
| Mammary | Alfalfa |          |                                            |          |     |
| gland   | hay     | Positive | metabolism of protein                      | 3.00E-10 | 476 |
| Mammary | Alfalfa |          |                                            |          |     |
| gland   | hay     | Positive | abnormal morphology of respiratory system  | 3.13E-10 | 165 |
| Mammary | Alfalfa |          |                                            |          |     |
| gland   | hay     | Positive | quantity of lymphatic system component     | 3.25E-10 | 199 |
| Mammary | Alfalfa |          |                                            |          |     |
| gland   | hay     | Positive | infection by HIV-1                         | 3.33E-10 | 309 |
| Mammary | Alfalfa |          |                                            |          |     |
| gland   | hay     | Positive | differentiation of leukocytes              | 3.52E-10 | 338 |
| Mammary | Alfalfa |          |                                            |          |     |
| gland   | hay     | Positive | arthropathy                                | 4.22E-10 | 466 |
| Mammary | Alfalfa |          |                                            |          |     |
| gland   | hay     | Positive | Lymphocyte homeostasis                     | 4.56E-10 | 278 |
| Mammary | Alfalfa |          |                                            |          |     |
| gland   | hay     | Positive | abnormal morphology of reproductive system | 4.56E-10 | 261 |
| Mammary | Alfalfa |          |                                            |          |     |
| gland   | hay     | Positive | autophagy                                  | 4.80E-10 | 197 |
| Mammary | Alfalfa |          |                                            |          |     |
| gland   | hay     | Positive | formation of plasma membrane projections   | 4.84E-10 | 302 |
| Mammary | Alfalfa |          |                                            |          |     |
| gland   | hay     | Positive | abnormal morphology of head                | 4.95E-10 | 411 |
| Mammary | Alfalfa |          |                                            |          |     |
| gland   | hay     | Positive | growth of lesion                           | 4.97E-10 | 395 |
| Mammary | Alfalfa |          |                                            |          |     |
| gland   | hay     | Positive | apoptosis of epithelial cell lines         | 5.13E-10 | 124 |
| Mammary | Alfalfa |          |                                            |          |     |
| gland   | hay     | Positive | morphology of reproductive system          | 5.37E-10 | 273 |
| Mammary | Alfalfa |          |                                            |          |     |
| gland   | hay     | Positive | quantity of carbohydrate                   | 5.37E-10 | 265 |
| Mammary | Alfalfa |          |                                            |          |     |
| gland   | hay     | Positive | proliferation of hematopoietic cells       | 5.46E-10 | 139 |
| Mammary | Alfalfa |          |                                            |          |     |
| gland   | hay     | Positive | arthritis                                  | 5.47E-10 | 458 |
| Mammary | Alfalfa |          |                                            |          |     |
| gland   | hay     | Positive | development of connective tissue           | 5.50E-10 | 195 |
| Mammary | Alfalfa |          |                                            |          |     |
| gland   | hay     | Positive | proliferation of fibroblast cell lines     | 5.80E-10 | 220 |
| Mammary | Alfalfa |          |                                            |          |     |
| gland   | hay     | Positive | morphology of vessel                       | 6.08E-10 | 164 |
| Mammary | Alfalfa | Positive | engulfment of cells                        | 6.29E-10 | 212 |



|         |         |          |                                           |          |     |
|---------|---------|----------|-------------------------------------------|----------|-----|
| gland   | hay     |          |                                           |          |     |
| Mammary | Alfalfa |          |                                           |          |     |
| gland   | hay     | Positive | development of lymphatic system component | 6.32E-10 | 165 |
| Mammary | Alfalfa |          |                                           |          |     |
| gland   | hay     | Positive | development of cardiovascular tissue      | 6.62E-10 | 194 |
| Mammary | Alfalfa |          |                                           |          |     |
| gland   | hay     | Positive | neuritogenesis                            | 6.75E-10 | 295 |
| Mammary | Alfalfa |          |                                           |          |     |
| gland   | hay     | Positive | growth of neurites                        | 6.86E-10 | 238 |
| Mammary | Alfalfa |          |                                           |          |     |
| gland   | hay     | Positive | Bleeding                                  | 6.96E-10 | 220 |
| Mammary | Alfalfa |          |                                           |          |     |
| gland   | hay     | Positive | homing of cells                           | 7.10E-10 | 283 |
| Mammary | Alfalfa |          |                                           |          |     |
| gland   | hay     | Positive | activation of DNA endogenous promoter     | 7.31E-10 | 579 |
| Mammary | Alfalfa |          |                                           |          |     |
| gland   | hay     | Positive | T cell development                        | 7.31E-10 | 257 |
| Mammary | Alfalfa |          |                                           |          |     |
| gland   | hay     | Positive | growth of tumor                           | 8.55E-10 | 393 |
| Mammary | Alfalfa |          |                                           |          |     |
| gland   | hay     | Positive | homing                                    | 9.63E-10 | 290 |
| Mammary | Alfalfa |          |                                           |          |     |
| gland   | hay     | Positive | morphology of muscle                      | 9.90E-10 | 177 |
| Mammary | Alfalfa |          |                                           |          |     |
| gland   | hay     | Positive | homeostasis of leukocytes                 | 1.00E-09 | 281 |
| Mammary | Alfalfa |          |                                           |          |     |
| gland   | hay     | Positive | cell death of cervical cancer cell lines  | 1.23E-09 | 184 |
| Mammary | Alfalfa |          |                                           |          |     |
| gland   | hay     | Positive | branching of cells                        | 1.23E-09 | 193 |
| Mammary | Alfalfa |          |                                           |          |     |
| gland   | hay     | Positive | function of cardiovascular system         | 1.23E-09 | 193 |
| Mammary | Alfalfa |          |                                           |          |     |
| gland   | hay     | Positive | breast or ovarian cancer                  | 1.31E-09 | 887 |
| Mammary | Alfalfa |          |                                           |          |     |
| gland   | hay     | Positive | proliferation of epithelial cells         | 1.51E-09 | 251 |
| Mammary | Alfalfa |          |                                           |          |     |
| gland   | hay     | Positive | morphogenesis of neurons                  | 1.52E-09 | 219 |
| Mammary | Alfalfa |          |                                           |          |     |
| gland   | hay     | Positive | quantity of lymphoid organ                | 1.52E-09 | 163 |
| Mammary | Alfalfa |          |                                           |          |     |
| gland   | hay     | Positive | cell movement of endothelial cells        | 1.56E-09 | 185 |
| Mammary | Alfalfa |          |                                           |          |     |
| gland   | hay     | Positive | synthesis of nitric oxide                 | 1.59E-09 | 148 |
| Mammary | Alfalfa | Positive | development of neurons                    | 1.69E-09 | 385 |

|         |         |          |                                                 |          |      |
|---------|---------|----------|-------------------------------------------------|----------|------|
| gland   | hay     |          |                                                 |          |      |
| Mammary | Alfalfa |          |                                                 |          |      |
| gland   | hay     | Positive | development of lymphatic system                 | 2.01E-09 | 186  |
| Mammary | Alfalfa |          |                                                 |          |      |
| gland   | hay     | Positive | outgrowth of plasma membrane projections        | 2.04E-09 | 210  |
| Mammary | Alfalfa |          |                                                 |          |      |
| gland   | hay     | Positive | apoptosis of lymphocytes                        | 2.20E-09 | 181  |
| Mammary | Alfalfa |          |                                                 |          |      |
| gland   | hay     | Positive | mass of connective tissue                       | 2.24E-09 | 111  |
| Mammary | Alfalfa |          |                                                 |          |      |
| gland   | hay     | Positive | vascularization                                 | 2.26E-09 | 128  |
| Mammary | Alfalfa |          |                                                 |          |      |
| gland   | hay     | Positive | apoptosis of mononuclear leukocytes             | 2.48E-09 | 186  |
| Mammary | Alfalfa |          |                                                 |          |      |
| gland   | hay     | Positive | T cell homeostasis                              | 2.52E-09 | 261  |
| Mammary | Alfalfa |          |                                                 |          |      |
| gland   | hay     | Positive | uptake of carbohydrate                          | 2.76E-09 | 154  |
| Mammary | Alfalfa |          |                                                 |          |      |
| gland   | hay     | Positive | apoptosis of T lymphocytes                      | 2.79E-09 | 149  |
| Mammary | Alfalfa |          |                                                 |          |      |
| gland   | hay     | Positive | apoptosis of neurons                            | 2.79E-09 | 223  |
| Mammary | Alfalfa |          |                                                 |          |      |
| gland   | hay     | Positive | proliferation of hematopoietic progenitor cells | 2.79E-09 | 131  |
| Mammary | Alfalfa |          |                                                 |          |      |
| gland   | hay     | Positive | morphology of blood vessel                      | 2.91E-09 | 150  |
| Mammary | Alfalfa |          |                                                 |          |      |
| gland   | hay     | Positive | apoptosis of leukocytes                         | 2.93E-09 | 233  |
| Mammary | Alfalfa |          |                                                 |          |      |
| gland   | hay     | Positive | autosomal dominant disease                      | 3.05E-09 | 317  |
| Mammary | Alfalfa |          |                                                 |          |      |
| gland   | hay     | Positive | female genital tract serous cancer              | 3.13E-09 | 199  |
| Mammary | Alfalfa |          |                                                 |          |      |
| gland   | hay     | Positive | gastrointestinal carcinoma                      | 3.32E-09 | 2008 |
| Mammary | Alfalfa |          |                                                 |          |      |
| gland   | hay     | Positive | activation of enzyme                            | 3.94E-09 | 200  |
| Mammary | Alfalfa |          |                                                 |          |      |
| gland   | hay     | Positive | cognition                                       | 4.23E-09 | 231  |
| Mammary | Alfalfa |          |                                                 |          |      |
| gland   | hay     | Positive | formation of lymphatic system component         | 4.47E-09 | 154  |
| Mammary | Alfalfa |          |                                                 |          |      |
| gland   | hay     | Positive | morphogenesis of neurites                       | 4.62E-09 | 214  |
| Mammary | Alfalfa |          |                                                 |          |      |
| gland   | hay     | Positive | development of endothelial tissue               | 4.97E-09 | 189  |
| Mammary | Alfalfa | Positive | outgrowth of neurites                           | 5.26E-09 | 207  |

|         |         |          |                                          |          |      |
|---------|---------|----------|------------------------------------------|----------|------|
| gland   | hay     |          |                                          |          |      |
| Mammary | Alfalfa |          |                                          |          |      |
| gland   | hay     | Positive | advanced malignant tumor                 | 5.65E-09 | 411  |
| Mammary | Alfalfa |          |                                          |          |      |
| gland   | hay     | Positive | differentiation of blood cells           | 5.76E-09 | 410  |
| Mammary | Alfalfa |          |                                          |          |      |
| gland   | hay     | Positive | cell spreading                           | 6.63E-09 | 146  |
| Mammary | Alfalfa |          |                                          |          |      |
| gland   | hay     | Positive | transport of protein                     | 6.65E-09 | 158  |
| Mammary | Alfalfa |          |                                          |          |      |
| gland   | hay     | Positive | morphology of genital organ              | 6.89E-09 | 216  |
| Mammary | Alfalfa |          |                                          |          |      |
| gland   | hay     | Positive | quantity of protein in blood             | 7.12E-09 | 255  |
| Mammary | Alfalfa |          |                                          |          |      |
| gland   | hay     | Positive | tumorigenesis of genital organ           | 7.36E-09 | 1742 |
| Mammary | Alfalfa |          |                                          |          |      |
| gland   | hay     | Positive | cellular degradation                     | 8.12E-09 | 135  |
| Mammary | Alfalfa |          |                                          |          |      |
| gland   | hay     | Positive | formation of lymphoid organ              | 8.16E-09 | 140  |
| Mammary | Alfalfa |          |                                          |          |      |
| gland   | hay     | Positive | proliferation of mononuclear leukocytes  | 8.76E-09 | 361  |
| Mammary | Alfalfa |          |                                          |          |      |
| gland   | hay     | Positive | activation of neuroglia                  | 8.81E-09 | 76   |
| Mammary | Alfalfa |          |                                          |          |      |
| gland   | hay     | Positive | uptake of monosaccharide                 | 8.97E-09 | 142  |
| Mammary | Alfalfa |          |                                          |          |      |
| gland   | hay     | Positive | cell death of kidney cells               | 9.68E-09 | 180  |
| Mammary | Alfalfa |          |                                          |          |      |
| gland   | hay     | Positive | accumulation of lipid                    | 9.83E-09 | 156  |
| Mammary | Alfalfa |          |                                          |          |      |
| gland   | hay     | Positive | endothelial cell development             | 1.00E-08 | 182  |
| Mammary | Alfalfa |          |                                          |          |      |
| gland   | hay     | Positive | formation of lung                        | 1.01E-08 | 157  |
| Mammary | Alfalfa |          |                                          |          |      |
| gland   | hay     | Positive | quantity of steroid                      | 1.04E-08 | 235  |
| Mammary | Alfalfa |          |                                          |          |      |
| gland   | hay     | Positive | gastrointestinal tract cancer            | 1.04E-08 | 2226 |
| Mammary | Alfalfa |          |                                          |          |      |
| gland   | hay     | Positive | learning                                 | 1.17E-08 | 212  |
| Mammary | Alfalfa |          |                                          |          |      |
| gland   | hay     | Positive | Gastrointestinal Tract Cancer and Tumors | 1.20E-08 | 2260 |
| Mammary | Alfalfa |          |                                          |          |      |
| gland   | hay     | Positive | quantity of adipose tissue               | 1.37E-08 | 146  |
| Mammary | Alfalfa | Positive | gonadal tumor                            | 1.40E-08 | 397  |

|         |         |          |                                           |          |     |
|---------|---------|----------|-------------------------------------------|----------|-----|
| gland   | hay     |          |                                           |          |     |
| Mammary | Alfalfa |          |                                           |          |     |
| gland   | hay     | Positive | cell movement of phagocytes               | 1.43E-08 | 273 |
| Mammary | Alfalfa |          |                                           |          |     |
| gland   | hay     | Positive | differentiation of mononuclear leukocytes | 1.47E-08 | 269 |
| Mammary | Alfalfa |          |                                           |          |     |
| gland   | hay     | Positive | cell movement of muscle cells             | 1.50E-08 | 99  |
| Mammary | Alfalfa |          |                                           |          |     |
| gland   | hay     | Positive | apoptosis of epithelial cells             | 1.53E-08 | 149 |
| Mammary | Alfalfa |          |                                           |          |     |
| gland   | hay     | Positive | phosphorylation of amino acids            | 1.83E-08 | 118 |
| Mammary | Alfalfa |          |                                           |          |     |
| gland   | hay     | Positive | morphology of lymphoid organ              | 1.89E-08 | 199 |
| Mammary | Alfalfa |          |                                           |          |     |
| gland   | hay     | Positive | abnormal morphology of nervous system     | 1.96E-08 | 353 |
| Mammary | Alfalfa |          |                                           |          |     |
| gland   | hay     | Positive | abnormal morphology of blood vessel       | 2.12E-08 | 139 |
| Mammary | Alfalfa |          |                                           |          |     |
| gland   | hay     | Positive | chemotaxis of cells                       | 2.15E-08 | 262 |
| Mammary | Alfalfa |          |                                           |          |     |
| gland   | hay     | Positive | accumulation of cells                     | 2.22E-08 | 180 |
| Mammary | Alfalfa |          |                                           |          |     |
| gland   | hay     | Positive | serous neoplasm                           | 2.26E-08 | 300 |
| Mammary | Alfalfa |          |                                           |          |     |
| gland   | hay     | Positive | size of embryo                            | 2.28E-08 | 182 |
| Mammary | Alfalfa |          |                                           |          |     |
| gland   | hay     | Positive | differentiation of lymphocytes            | 2.34E-08 | 248 |
| Mammary | Alfalfa |          |                                           |          |     |
| gland   | hay     | Positive | inflammatory response                     | 2.36E-08 | 377 |
| Mammary | Alfalfa |          |                                           |          |     |
| gland   | hay     | Positive | cell movement of smooth muscle cells      | 2.37E-08 | 89  |
| Mammary | Alfalfa |          |                                           |          |     |
| gland   | hay     | Positive | apoptosis of muscle                       | 2.44E-08 | 137 |
| Mammary | Alfalfa |          |                                           |          |     |
| gland   | hay     | Positive | synthesis of carbohydrate                 | 2.44E-08 | 214 |
| Mammary | Alfalfa |          |                                           |          |     |
| gland   | hay     | Positive | respiratory system development            | 2.45E-08 | 175 |
| Mammary | Alfalfa |          |                                           |          |     |
| gland   | hay     | Positive | outgrowth of cells                        | 2.45E-08 | 218 |
| Mammary | Alfalfa |          |                                           |          |     |
| gland   | hay     | Positive | abnormal morphology of lymphoid organ     | 2.54E-08 | 192 |
| Mammary | Alfalfa |          |                                           |          |     |
| gland   | hay     | Positive | peripheral vascular disease               | 2.56E-08 | 193 |
| Mammary | Alfalfa | Positive | tumorigenesis of gonad                    | 2.60E-08 | 390 |

|         |         |          |                                            |          |      |
|---------|---------|----------|--------------------------------------------|----------|------|
| gland   | hay     |          |                                            |          |      |
| Mammary | Alfalfa |          |                                            |          |      |
| gland   | hay     | Positive | dysgenesis                                 | 2.76E-08 | 267  |
| Mammary | Alfalfa |          |                                            |          |      |
| gland   | hay     | Positive | Ovarian Cancer and Tumors                  | 2.82E-08 | 367  |
| Mammary | Alfalfa |          |                                            |          |      |
| gland   | hay     | Positive | genital tract cancer                       | 2.82E-08 | 1721 |
| Mammary | Alfalfa |          |                                            |          |      |
| gland   | hay     | Positive | proliferation of lymphocytes               | 2.82E-08 | 353  |
| Mammary | Alfalfa |          |                                            |          |      |
| gland   | hay     | Positive | peripheral arterial disease                | 2.85E-08 | 113  |
| Mammary | Alfalfa |          |                                            |          |      |
| gland   | hay     | Positive | phosphorylation of L-amino acid            | 2.86E-08 | 117  |
| Mammary | Alfalfa |          |                                            |          |      |
| gland   | hay     | Positive | apoptosis of muscle cells                  | 2.90E-08 | 136  |
| Mammary | Alfalfa |          |                                            |          |      |
| gland   | hay     | Positive | cell movement of carcinoma cell lines      | 2.99E-08 | 110  |
| Mammary | Alfalfa |          |                                            |          |      |
| gland   | hay     | Positive | craniofacial abnormality                   | 3.26E-08 | 181  |
| Mammary | Alfalfa |          |                                            |          |      |
| gland   | hay     | Positive | necrosis of kidney                         | 3.43E-08 | 185  |
| Mammary | Alfalfa |          |                                            |          |      |
| gland   | hay     | Positive | quantity of hematopoietic progenitor cells | 3.44E-08 | 221  |
| Mammary | Alfalfa |          |                                            |          |      |
| gland   | hay     | Positive | secretion of molecule                      | 3.52E-08 | 272  |
| Mammary | Alfalfa |          |                                            |          |      |
| gland   | hay     | Positive | chemotaxis                                 | 3.63E-08 | 269  |
| Mammary | Alfalfa |          |                                            |          |      |
| gland   | hay     | Positive | mass of adipose tissue                     | 3.66E-08 | 102  |
| Mammary | Alfalfa |          |                                            |          |      |
| gland   | hay     | Positive | concentration of phospholipid              | 3.73E-08 | 99   |
| Mammary | Alfalfa |          |                                            |          |      |
| gland   | hay     | Positive | infection of embryonic cell lines          | 3.83E-08 | 143  |
| Mammary | Alfalfa |          |                                            |          |      |
| gland   | hay     | Positive | infection of epithelial cell lines         | 3.83E-08 | 143  |
| Mammary | Alfalfa |          |                                            |          |      |
| gland   | hay     | Positive | formation of blood cells                   | 3.83E-08 | 106  |
| Mammary | Alfalfa |          |                                            |          |      |
| gland   | hay     | Positive | arrest in interphase                       | 4.00E-08 | 209  |
| Mammary | Alfalfa |          |                                            |          |      |
| gland   | hay     | Positive | metastasis                                 | 4.02E-08 | 367  |
| Mammary | Alfalfa |          |                                            |          |      |
| gland   | hay     | Positive | export of molecule                         | 4.06E-08 | 152  |
| Mammary | Alfalfa | Positive | Hypoplasia                                 | 4.21E-08 | 250  |

|         |         |          |                                         |          |      |
|---------|---------|----------|-----------------------------------------|----------|------|
| gland   | hay     |          |                                         |          |      |
| Mammary | Alfalfa |          |                                         |          |      |
| gland   | hay     | Positive | morphology of lung                      | 4.47E-08 | 101  |
| Mammary | Alfalfa |          |                                         |          |      |
| gland   | hay     | Positive | activation of blood cells               | 4.51E-08 | 361  |
| Mammary | Alfalfa |          |                                         |          |      |
| gland   | hay     | Positive | abnormal morphology of genital organ    | 4.71E-08 | 205  |
| Mammary | Alfalfa |          |                                         |          |      |
| gland   | hay     | Positive | differentiation of bone                 | 4.72E-08 | 206  |
| Mammary | Alfalfa |          |                                         |          |      |
| gland   | hay     | Positive | cell death of brain                     | 4.76E-08 | 150  |
| Mammary | Alfalfa |          |                                         |          |      |
| gland   | hay     | Positive | Dermatitis                              | 4.76E-08 | 217  |
| Mammary | Alfalfa |          |                                         |          |      |
| gland   | hay     | Positive | formation of leukocytes                 | 4.84E-08 | 87   |
| Mammary | Alfalfa |          |                                         |          |      |
| gland   | hay     | Positive | migration of smooth muscle cells        | 4.94E-08 | 82   |
| Mammary | Alfalfa |          |                                         |          |      |
| gland   | hay     | Positive | migration of muscle cells               | 4.97E-08 | 90   |
| Mammary | Alfalfa |          |                                         |          |      |
| gland   | hay     | Positive | targeting of protein                    | 5.16E-08 | 73   |
| Mammary | Alfalfa |          |                                         |          |      |
| gland   | hay     | Positive | differentiation of T lymphocytes        | 5.17E-08 | 191  |
| Mammary | Alfalfa |          |                                         |          |      |
| gland   | hay     | Positive | growth of lymphatic system component    | 5.24E-08 | 103  |
| Mammary | Alfalfa |          |                                         |          |      |
| gland   | hay     | Positive | differentiation of muscle               | 5.41E-08 | 155  |
| Mammary | Alfalfa |          |                                         |          |      |
| gland   | hay     | Positive | proliferation of lymphatic system cells | 5.41E-08 | 107  |
| Mammary | Alfalfa |          |                                         |          |      |
| gland   | hay     | Positive | metabolism of DNA                       | 5.41E-08 | 200  |
| Mammary | Alfalfa |          |                                         |          |      |
| gland   | hay     | Positive | urogenital cancer                       | 5.41E-08 | 1962 |
| Mammary | Alfalfa |          |                                         |          |      |
| gland   | hay     | Positive | differentiation of bone cells           | 5.47E-08 | 204  |
| Mammary | Alfalfa |          |                                         |          |      |
| gland   | hay     | Positive | formation of actin filaments            | 5.47E-08 | 156  |
| Mammary | Alfalfa |          |                                         |          |      |
| gland   | hay     | Positive | migration of endothelial cells          | 5.59E-08 | 167  |
| Mammary | Alfalfa |          |                                         |          |      |
| gland   | hay     | Positive | degeneration of neurons                 | 5.69E-08 | 125  |
| Mammary | Alfalfa |          |                                         |          |      |
| gland   | hay     | Positive | cell death of fibroblasts               | 5.96E-08 | 137  |
| Mammary | Alfalfa | Positive | blood protein disorder                  | 6.03E-08 | 189  |

|         |         |          |                                            |          |      |
|---------|---------|----------|--------------------------------------------|----------|------|
| gland   | hay     |          |                                            |          |      |
| Mammary | Alfalfa |          |                                            |          |      |
| gland   | hay     | Positive | accumulation of blood cells                | 6.03E-08 | 144  |
| Mammary | Alfalfa |          |                                            |          |      |
| gland   | hay     | Positive | apoptosis of cervical cancer cell lines    | 6.23E-08 | 145  |
| Mammary | Alfalfa |          |                                            |          |      |
| gland   | hay     | Positive | quantity of thymus gland                   | 6.24E-08 | 122  |
| Mammary | Alfalfa |          |                                            |          |      |
| gland   | hay     | Positive | quantity of B lymphocytes                  | 6.28E-08 | 175  |
| Mammary | Alfalfa |          |                                            |          |      |
| gland   | hay     | Positive | infection of kidney cell lines             | 6.39E-08 | 146  |
| Mammary | Alfalfa |          |                                            |          |      |
| gland   | hay     | Positive | cell death of muscle cells                 | 7.18E-08 | 170  |
| Mammary | Alfalfa |          |                                            |          |      |
| gland   | hay     | Positive | generation of leukocytes                   | 7.43E-08 | 88   |
| Mammary | Alfalfa |          |                                            |          |      |
| gland   | hay     | Positive | degeneration of cells                      | 7.58E-08 | 174  |
| Mammary | Alfalfa |          |                                            |          |      |
| gland   | hay     | Positive | cell movement of neutrophils               | 7.58E-08 | 152  |
| Mammary | Alfalfa |          |                                            |          |      |
| gland   | hay     | Positive | invasion of carcinoma cell lines           | 8.07E-08 | 105  |
| Mammary | Alfalfa |          |                                            |          |      |
| gland   | hay     | Positive | transmembrane potential of mitochondria    | 8.10E-08 | 113  |
| Mammary | Alfalfa |          |                                            |          |      |
| gland   | hay     | Positive | function of phagocytes                     | 8.34E-08 | 156  |
| Mammary | Alfalfa |          |                                            |          |      |
| gland   | hay     | Positive | synthesis of reactive oxygen species       | 8.38E-08 | 237  |
| Mammary | Alfalfa |          |                                            |          |      |
| gland   | hay     | Positive | production of reactive oxygen species      | 8.39E-08 | 184  |
| Mammary | Alfalfa |          |                                            |          |      |
| gland   | hay     | Positive | paraproteinemia                            | 8.71E-08 | 170  |
| Mammary | Alfalfa |          |                                            |          |      |
| gland   | hay     | Positive | quantity of antigen presenting cells       | 8.85E-08 | 142  |
| Mammary | Alfalfa |          |                                            |          |      |
| gland   | hay     | Positive | quantity of phagocytes                     | 9.22E-08 | 211  |
| Mammary | Alfalfa |          |                                            |          |      |
| gland   | hay     | Positive | tumorigenesis of reproductive tract        | 9.44E-08 | 1517 |
| Mammary | Alfalfa |          |                                            |          |      |
| gland   | hay     | Positive | cell death of central nervous system cells | 1.09E-07 | 149  |
| Mammary | Alfalfa |          |                                            |          |      |
| gland   | hay     | Positive | generation of blood cells                  | 1.15E-07 | 89   |
| Mammary | Alfalfa |          |                                            |          |      |
| gland   | hay     | Positive | abnormal morphology of internal genitalia  | 1.15E-07 | 176  |
| Mammary | Alfalfa | Positive | quantity of thymocytes                     | 1.22E-07 | 120  |

|         |         |          |                                               |          |     |
|---------|---------|----------|-----------------------------------------------|----------|-----|
| gland   | hay     |          |                                               |          |     |
| Mammary | Alfalfa |          |                                               |          |     |
| gland   | hay     | Positive | cell death of kidney cell lines               | 1.23E-07 | 154 |
| Mammary | Alfalfa |          |                                               |          |     |
| gland   | hay     | Positive | branching of neurons                          | 1.25E-07 | 146 |
| Mammary | Alfalfa |          |                                               |          |     |
| gland   | hay     | Positive | I-kappaB kinase/NF-kappaB cascade             | 1.26E-07 | 93  |
| Mammary | Alfalfa |          |                                               |          |     |
| gland   | hay     | Positive | plasma cell dyscrasia                         | 1.29E-07 | 169 |
| Mammary | Alfalfa |          |                                               |          |     |
| gland   | hay     | Positive | concentration of cholesterol                  | 1.32E-07 | 148 |
| Mammary | Alfalfa |          |                                               |          |     |
| gland   | hay     | Positive | function of mononuclear leukocytes            | 1.33E-07 | 172 |
| Mammary | Alfalfa |          |                                               |          |     |
| gland   | hay     | Positive | cell death of muscle                          | 1.34E-07 | 173 |
| Mammary | Alfalfa |          |                                               |          |     |
| gland   | hay     | Positive | abnormal morphology of muscle                 | 1.36E-07 | 160 |
| Mammary | Alfalfa |          |                                               |          |     |
| gland   | hay     | Positive | Hypertrophy                                   | 1.39E-07 | 233 |
| Mammary | Alfalfa |          |                                               |          |     |
| gland   | hay     | Positive | activation of leukocytes                      | 1.50E-07 | 336 |
| Mammary | Alfalfa |          |                                               |          |     |
| gland   | hay     | Positive | concentration of sterol                       | 1.53E-07 | 155 |
| Mammary | Alfalfa |          |                                               |          |     |
| gland   | hay     | Positive | metabolism of membrane lipid derivative       | 1.53E-07 | 193 |
| Mammary | Alfalfa |          |                                               |          |     |
| gland   | hay     | Positive | cell viability of cervical cancer cell lines  | 1.53E-07 | 115 |
| Mammary | Alfalfa |          |                                               |          |     |
| gland   | hay     | Positive | function of lymphocytes                       | 1.59E-07 | 171 |
| Mammary | Alfalfa |          |                                               |          |     |
| gland   | hay     | Positive | necrosis of muscle                            | 1.61E-07 | 172 |
| Mammary | Alfalfa |          |                                               |          |     |
| gland   | hay     | Positive | cell death of tumor                           | 1.83E-07 | 190 |
| Mammary | Alfalfa |          |                                               |          |     |
| gland   | hay     | Positive | cellular infiltration of blood cells          | 1.84E-07 | 193 |
| Mammary | Alfalfa |          |                                               |          |     |
| gland   | hay     | Positive | branching of neurites                         | 2.13E-07 | 141 |
| Mammary | Alfalfa |          |                                               |          |     |
| gland   | hay     | Positive | proliferation of vascular smooth muscle cells | 2.15E-07 | 83  |
| Mammary | Alfalfa |          |                                               |          |     |
| gland   | hay     | Positive | morphology of pulmonary alveolus              | 2.20E-07 | 66  |
| Mammary | Alfalfa |          |                                               |          |     |
| gland   | hay     | Positive | autophagy of cells                            | 2.23E-07 | 135 |
| Mammary | Alfalfa | Positive | growth of skin                                | 2.34E-07 | 113 |



|         |         |          |                                             |          |      |
|---------|---------|----------|---------------------------------------------|----------|------|
| gland   | hay     |          |                                             |          |      |
| Mammary | Alfalfa |          |                                             |          |      |
| gland   | hay     | Positive | morphology of heart ventricle               | 2.47E-07 | 101  |
| Mammary | Alfalfa |          |                                             |          |      |
| gland   | hay     | Positive | female genital tract cancer                 | 2.49E-07 | 1503 |
| Mammary | Alfalfa |          |                                             |          |      |
| gland   | hay     | Positive | neoplasia of cells                          | 2.49E-07 | 218  |
| Mammary | Alfalfa |          |                                             |          |      |
| gland   | hay     | Positive | incidence of tumor                          | 2.56E-07 | 161  |
| Mammary | Alfalfa |          |                                             |          |      |
| gland   | hay     | Positive | cell movement of granulocytes               | 2.58E-07 | 184  |
| Mammary | Alfalfa |          |                                             |          |      |
| gland   | hay     | Positive | development of digestive system             | 2.62E-07 | 190  |
| Mammary | Alfalfa |          |                                             |          |      |
| gland   | hay     | Positive | cellular infiltration by leukocytes         | 2.62E-07 | 192  |
| Mammary | Alfalfa |          |                                             |          |      |
| gland   | hay     | Positive | allergy                                     | 2.62E-07 | 200  |
| Mammary | Alfalfa |          |                                             |          |      |
| gland   | hay     | Positive | morphology of muscle cells                  | 2.64E-07 | 88   |
| Mammary | Alfalfa |          |                                             |          |      |
| gland   | hay     | Positive | biosynthesis of polyunsaturated fatty acids | 2.69E-07 | 116  |
| Mammary | Alfalfa |          |                                             |          |      |
| gland   | hay     | Positive | mass of organism                            | 2.73E-07 | 167  |
| Mammary | Alfalfa |          |                                             |          |      |
| gland   | hay     | Positive | cell death of hematopoietic cells           | 2.76E-07 | 122  |
| Mammary | Alfalfa |          |                                             |          |      |
| gland   | hay     | Positive | bone mineral density                        | 2.81E-07 | 92   |
| Mammary | Alfalfa |          |                                             |          |      |
| gland   | hay     | Positive | formation of actin stress fibers            | 2.87E-07 | 123  |
| Mammary | Alfalfa |          |                                             |          |      |
| gland   | hay     | Positive | epileptic seizure                           | 2.88E-07 | 89   |
| Mammary | Alfalfa |          |                                             |          |      |
| gland   | hay     | Positive | progression of tumor                        | 2.91E-07 | 86   |
| Mammary | Alfalfa |          |                                             |          |      |
| gland   | hay     | Positive | abnormal morphology of lung                 | 2.91E-07 | 96   |
| Mammary | Alfalfa |          |                                             |          |      |
| gland   | hay     | Positive | cell death of cerebral cortex cells         | 2.93E-07 | 118  |
| Mammary | Alfalfa |          |                                             |          |      |
| gland   | hay     | Positive | congenital malformation of skeleton         | 3.00E-07 | 208  |
| Mammary | Alfalfa |          |                                             |          |      |
| gland   | hay     | Positive | cellular infiltration of cells              | 3.08E-07 | 196  |
| Mammary | Alfalfa |          |                                             |          |      |
| gland   | hay     | Positive | mammary tumor                               | 3.14E-07 | 748  |
| Mammary | Alfalfa | Positive | development of hematopoietic system         | 3.32E-07 | 127  |

|         |         |          |                                                |          |      |
|---------|---------|----------|------------------------------------------------|----------|------|
| gland   | hay     |          |                                                |          |      |
| Mammary | Alfalfa |          |                                                |          |      |
| gland   | hay     | Positive | function of muscle                             | 3.45E-07 | 173  |
| Mammary | Alfalfa |          |                                                |          |      |
| gland   | hay     | Positive | apoptosis of kidney cell lines                 | 3.48E-07 | 122  |
| Mammary | Alfalfa |          |                                                |          |      |
| gland   | hay     | Positive | cell death of tumor cells                      | 3.63E-07 | 184  |
| Mammary | Alfalfa |          |                                                |          |      |
| gland   | hay     | Positive | morphology of gonad                            | 3.65E-07 | 187  |
| Mammary | Alfalfa |          |                                                |          |      |
| gland   | hay     | Positive | necrosis of tumor                              | 3.65E-07 | 188  |
| Mammary | Alfalfa |          |                                                |          |      |
| gland   | hay     | Positive | metabolism of reactive oxygen species          | 3.67E-07 | 243  |
| Mammary | Alfalfa |          |                                                |          |      |
| gland   | hay     | Positive | transformation of fibroblast cell lines        | 3.77E-07 | 131  |
| Mammary | Alfalfa |          |                                                |          |      |
| gland   | hay     | Positive | hepatobiliary system cancer                    | 4.02E-07 | 1903 |
| Mammary | Alfalfa |          |                                                |          |      |
| gland   | hay     | Positive | differentiation of muscle cells                | 4.06E-07 | 142  |
| Mammary | Alfalfa |          |                                                |          |      |
| gland   | hay     | Positive | ovarian cancer                                 | 4.22E-07 | 339  |
| Mammary | Alfalfa |          |                                                |          |      |
| gland   | hay     | Positive | migration of carcinoma cell lines              | 4.23E-07 | 90   |
| Mammary | Alfalfa |          |                                                |          |      |
| gland   | hay     | Positive | binding of protein binding site                | 4.32E-07 | 145  |
| Mammary | Alfalfa |          |                                                |          |      |
| gland   | hay     | Positive | vascular lesion                                | 4.35E-07 | 116  |
| Mammary | Alfalfa |          | intermediate disease stage peripheral arterial |          |      |
| gland   | hay     | Positive | disease                                        | 4.41E-07 | 84   |
| Mammary | Alfalfa |          |                                                |          |      |
| gland   | hay     | Positive | quantity of cytokine                           | 4.42E-07 | 129  |
| Mammary | Alfalfa |          |                                                |          |      |
| gland   | hay     | Positive | development of abdomen                         | 4.55E-07 | 279  |
| Mammary | Alfalfa |          |                                                |          |      |
| gland   | hay     | Positive | cell death of pheochromocytoma cell lines      | 4.61E-07 | 66   |
| Mammary | Alfalfa |          |                                                |          |      |
| gland   | hay     | Positive | cellular infiltration                          | 4.70E-07 | 214  |
| Mammary | Alfalfa |          |                                                |          |      |
| gland   | hay     | Positive | generation of lymphocytes                      | 4.70E-07 | 76   |
| Mammary | Alfalfa |          |                                                |          |      |
| gland   | hay     | Positive | movement of vascular endothelial cells         | 4.70E-07 | 95   |
| Mammary | Alfalfa |          |                                                |          |      |
| gland   | hay     | Positive | cell death of embryonic cells                  | 4.76E-07 | 64   |
| Mammary | Alfalfa | Positive | S phase                                        | 4.80E-07 | 132  |

|         |         |          |                                                    |          |      |
|---------|---------|----------|----------------------------------------------------|----------|------|
| gland   | hay     |          |                                                    |          |      |
| Mammary | Alfalfa |          |                                                    |          |      |
| gland   | hay     | Positive | cell viability of connective tissue cells          | 5.57E-07 | 72   |
| Mammary | Alfalfa |          |                                                    |          |      |
| gland   | hay     | Positive | concentration of acylglycerol                      | 5.70E-07 | 166  |
| Mammary | Alfalfa |          |                                                    |          |      |
| gland   | hay     | Positive | catabolism of protein                              | 5.76E-07 | 289  |
| Mammary | Alfalfa |          |                                                    |          |      |
| gland   | hay     | Positive | secretory pathway                                  | 5.77E-07 | 102  |
| Mammary | Alfalfa |          |                                                    |          |      |
| gland   | hay     | Positive | Rheumatic Disease                                  | 5.78E-07 | 501  |
| Mammary | Alfalfa |          |                                                    |          |      |
| gland   | hay     | Positive | G1 phase                                           | 6.09E-07 | 191  |
| Mammary | Alfalfa |          |                                                    |          |      |
| gland   | hay     | Positive | synthesis of eicosanoid                            | 6.17E-07 | 113  |
| Mammary | Alfalfa |          |                                                    |          |      |
| gland   | hay     | Positive | quantity of macrophages                            | 6.50E-07 | 104  |
| Mammary | Alfalfa |          |                                                    |          |      |
| gland   | hay     | Positive | hepatocellular carcinoma                           | 6.51E-07 | 1834 |
| Mammary | Alfalfa |          |                                                    |          |      |
| gland   | hay     | Positive | apoptosis of pheochromocytoma cell lines           | 7.04E-07 | 52   |
| Mammary | Alfalfa |          |                                                    |          |      |
| gland   | hay     | Positive | skin abnormality                                   | 7.04E-07 | 116  |
| Mammary | Alfalfa |          |                                                    |          |      |
| gland   | hay     | Positive | quantity of double-positive thymocyte              | 7.31E-07 | 62   |
| Mammary | Alfalfa |          |                                                    |          |      |
| gland   | hay     | Positive | colorectal neoplasia                               | 7.35E-07 | 1901 |
| Mammary | Alfalfa |          |                                                    |          |      |
| gland   | hay     | Positive | generation of mononuclear leukocytes               | 7.41E-07 | 77   |
| Mammary | Alfalfa |          |                                                    |          |      |
| gland   | hay     | Positive | function of antigen presenting cells               | 7.43E-07 | 124  |
| Mammary | Alfalfa |          |                                                    |          |      |
| gland   | hay     | Positive | Cytosis                                            | 7.83E-07 | 159  |
| Mammary | Alfalfa |          |                                                    |          |      |
| gland   | hay     | Positive | formation of filopodia                             | 7.87E-07 | 87   |
| Mammary | Alfalfa |          |                                                    |          |      |
| gland   | hay     | Positive | formation of connective tissue cells               | 7.99E-07 | 108  |
| Mammary | Alfalfa |          |                                                    |          |      |
| gland   | hay     | Positive | metabolism of nucleic acid component or derivative | 7.99E-07 | 250  |
| Mammary | Alfalfa |          |                                                    |          |      |
| gland   | hay     | Positive | cell death of cortical neurons                     | 8.12E-07 | 91   |
| Mammary | Alfalfa |          |                                                    |          |      |
| gland   | hay     | Positive | adhesion of immune cells                           | 8.47E-07 | 172  |
| Mammary | Alfalfa | Positive | Oral Cancer and Tumors                             | 8.88E-07 | 116  |

|         |         |          |                                          |          |      |
|---------|---------|----------|------------------------------------------|----------|------|
| gland   | hay     |          |                                          |          |      |
| Mammary | Alfalfa |          |                                          |          |      |
| gland   | hay     | Positive | morphology of intestine                  | 8.88E-07 | 116  |
| Mammary | Alfalfa |          |                                          |          |      |
| gland   | hay     | Positive | formation of eye                         | 8.89E-07 | 213  |
| Mammary | Alfalfa |          |                                          |          |      |
| gland   | hay     | Positive | morphology of secondary lymphoid organ   | 8.90E-07 | 140  |
| Mammary | Alfalfa |          |                                          |          |      |
| gland   | hay     | Positive | mass of fat pad                          | 8.91E-07 | 61   |
| Mammary | Alfalfa |          |                                          |          |      |
| gland   | hay     | Positive | shape change of neurites                 | 9.21E-07 | 142  |
| Mammary | Alfalfa |          |                                          |          |      |
| gland   | hay     | Positive | benign neoplasm of female genital organ  | 9.24E-07 | 207  |
| Mammary | Alfalfa |          |                                          |          |      |
| gland   | hay     | Positive | liver tumor                              | 9.58E-07 | 1902 |
| Mammary | Alfalfa |          |                                          |          |      |
| gland   | hay     | Positive | adenoma                                  | 9.64E-07 | 265  |
| Mammary | Alfalfa |          |                                          |          |      |
| gland   | hay     | Positive | accumulation of leukocytes               | 9.64E-07 | 134  |
| Mammary | Alfalfa |          |                                          |          |      |
| gland   | hay     | Positive | liver lesion                             | 9.75E-07 | 1903 |
| Mammary | Alfalfa |          |                                          |          |      |
| gland   | hay     | Positive | DNA replication                          | 9.75E-07 | 126  |
| Mammary | Alfalfa |          |                                          |          |      |
| gland   | hay     | Positive | recruitment of cells                     | 1.01E-06 | 175  |
| Mammary | Alfalfa |          |                                          |          |      |
| gland   | hay     | Positive | quantity of natural killer T lymphocytes | 1.01E-06 | 39   |
| Mammary | Alfalfa |          |                                          |          |      |
| gland   | hay     | Positive | pelvic tumor                             | 1.02E-06 | 1907 |
| Mammary | Alfalfa |          |                                          |          |      |
| gland   | hay     | Positive | cell death of sarcoma cell lines         | 1.07E-06 | 115  |
| Mammary | Alfalfa |          |                                          |          |      |
| gland   | hay     | Positive | oral cancer                              | 1.07E-06 | 115  |
| Mammary | Alfalfa |          |                                          |          |      |
| gland   | hay     | Positive | colon cancer                             | 1.09E-06 | 1625 |
| Mammary | Alfalfa |          |                                          |          |      |
| gland   | hay     | Positive | proliferation of T lymphocytes           | 1.10E-06 | 288  |
| Mammary | Alfalfa |          |                                          |          |      |
| gland   | hay     | Positive | shape change of tumor cell lines         | 1.10E-06 | 81   |
| Mammary | Alfalfa |          |                                          |          |      |
| gland   | hay     | Positive | tumorigenesis of intestine               | 1.15E-06 | 1633 |
| Mammary | Alfalfa |          |                                          |          |      |
| gland   | hay     | Positive | urination disorder                       | 1.15E-06 | 144  |
| Mammary | Alfalfa | Positive | intestinal tumor                         | 1.15E-06 | 1904 |

|         |         |          |                                              |          |      |
|---------|---------|----------|----------------------------------------------|----------|------|
| gland   | hay     |          |                                              |          |      |
| Mammary | Alfalfa |          |                                              |          |      |
| gland   | hay     | Positive | gastrointestinal adenocarcinoma              | 1.20E-06 | 1866 |
| Mammary | Alfalfa |          |                                              |          |      |
| gland   | hay     | Positive | development of central nervous system        | 1.21E-06 | 303  |
| Mammary | Alfalfa |          |                                              |          |      |
| gland   | hay     | Positive | pelvic cancer                                | 1.22E-06 | 1894 |
| Mammary | Alfalfa |          |                                              |          |      |
| gland   | hay     | Positive | cell death of brain cells                    | 1.22E-06 | 136  |
| Mammary | Alfalfa |          |                                              |          |      |
| gland   | hay     | Positive | organization of actin cytoskeleton           | 1.22E-06 | 149  |
| Mammary | Alfalfa |          |                                              |          |      |
| gland   | hay     | Positive | uptake of D-hexose                           | 1.24E-06 | 113  |
| Mammary | Alfalfa |          |                                              |          |      |
| gland   | hay     | Positive | function of myeloid cells                    | 1.26E-06 | 120  |
| Mammary | Alfalfa |          |                                              |          |      |
| gland   | hay     | Positive | morphology of spleen                         | 1.29E-06 | 139  |
| Mammary | Alfalfa |          |                                              |          |      |
| gland   | hay     | Positive | apoptosis of liver                           | 1.32E-06 | 83   |
| Mammary | Alfalfa |          |                                              |          |      |
| gland   | hay     | Positive | cell death of heart                          | 1.33E-06 | 115  |
| Mammary | Alfalfa |          |                                              |          |      |
| gland   | hay     | Positive | cell death of hematopoietic progenitor cells | 1.33E-06 | 115  |
| Mammary | Alfalfa |          |                                              |          |      |
| gland   | hay     | Positive | cell death of neuroblastoma cell lines       | 1.34E-06 | 99   |
| Mammary | Alfalfa |          |                                              |          |      |
| gland   | hay     | Positive | formation of osteoclasts                     | 1.34E-06 | 66   |
| Mammary | Alfalfa |          |                                              |          |      |
| gland   | hay     | Positive | quantity of interleukin                      | 1.35E-06 | 74   |
| Mammary | Alfalfa |          |                                              |          |      |
| gland   | hay     | Positive | phosphorylation of L-tyrosine                | 1.38E-06 | 91   |
| Mammary | Alfalfa |          |                                              |          |      |
| gland   | hay     | Positive | abnormal morphology of gonad                 | 1.40E-06 | 178  |
| Mammary | Alfalfa |          |                                              |          |      |
| gland   | hay     | Positive | cell death of liver cells                    | 1.41E-06 | 100  |
| Mammary | Alfalfa |          |                                              |          |      |
| gland   | hay     | Positive | neoplasia of colon                           | 1.42E-06 | 1628 |
| Mammary | Alfalfa |          |                                              |          |      |
| gland   | hay     | Positive | morphology of testis                         | 1.46E-06 | 135  |
| Mammary | Alfalfa |          |                                              |          |      |
| gland   | hay     | Positive | development of sensory organ                 | 1.50E-06 | 269  |
| Mammary | Alfalfa |          |                                              |          |      |
| gland   | hay     | Positive | formation of vascular lesion                 | 1.50E-06 | 62   |
| Mammary | Alfalfa | Positive | liver cancer                                 | 1.51E-06 | 1887 |

|         |         |          |                                      |          |      |
|---------|---------|----------|--------------------------------------|----------|------|
| gland   | hay     |          |                                      |          |      |
| Mammary | Alfalfa |          |                                      |          |      |
| gland   | hay     | Positive | colon tumor                          | 1.67E-06 | 1632 |
| Mammary | Alfalfa |          |                                      |          |      |
| gland   | hay     | Positive | cell movement of fibroblasts         | 1.68E-06 | 94   |
| Mammary | Alfalfa |          |                                      |          |      |
| gland   | hay     | Positive | colorectal cancer                    | 1.70E-06 | 1871 |
| Mammary | Alfalfa |          |                                      |          |      |
| gland   | hay     | Positive | cytopenia                            | 1.75E-06 | 147  |
| Mammary | Alfalfa |          |                                      |          |      |
| gland   | hay     | Positive | apoptosis of fibroblasts             | 1.75E-06 | 110  |
| Mammary | Alfalfa |          |                                      |          |      |
| gland   | hay     | Positive | binding of cells                     | 1.77E-06 | 230  |
| Mammary | Alfalfa |          |                                      |          |      |
| gland   | hay     | Positive | morphology of skin                   | 1.79E-06 | 135  |
| Mammary | Alfalfa |          |                                      |          |      |
| gland   | hay     | Positive | cellular infiltration of phagocytes  | 1.80E-06 | 91   |
| Mammary | Alfalfa |          |                                      |          |      |
| gland   | hay     | Positive | quantity of reactive oxygen species  | 1.80E-06 | 91   |
| Mammary | Alfalfa |          |                                      |          |      |
| gland   | hay     | Positive | cell death of heart cells            | 1.81E-06 | 111  |
| Mammary | Alfalfa |          |                                      |          |      |
| gland   | hay     | Positive | ion homeostasis of cells             | 1.82E-06 | 265  |
| Mammary | Alfalfa |          |                                      |          |      |
| gland   | hay     | Positive | production of HIV                    | 1.82E-06 | 35   |
| Mammary | Alfalfa |          |                                      |          |      |
| gland   | hay     | Positive | connective or soft tissue tumor      | 1.90E-06 | 332  |
| Mammary | Alfalfa |          |                                      |          |      |
| gland   | hay     | Positive | polymerization of protein            | 1.94E-06 | 180  |
| Mammary | Alfalfa |          |                                      |          |      |
| gland   | hay     | Positive | differentiation of epithelial tissue | 1.96E-06 | 175  |
| Mammary | Alfalfa |          |                                      |          |      |
| gland   | hay     | Positive | apoptosis of hematopoietic cells     | 2.13E-06 | 109  |
| Mammary | Alfalfa |          |                                      |          |      |
| gland   | hay     | Positive | function of heart                    | 2.15E-06 | 116  |
| Mammary | Alfalfa |          |                                      |          |      |
| gland   | hay     | Positive | uterine serous papillary cancer      | 2.15E-06 | 116  |
| Mammary | Alfalfa |          |                                      |          |      |
| gland   | hay     | Negative | organismal death                     | 2.24E-18 | 502  |
| Mammary | Alfalfa |          |                                      |          |      |
| gland   | hay     | Negative | morbidity or mortality               | 2.71E-18 | 506  |
| Mammary | Alfalfa |          |                                      |          |      |
| gland   | hay     | Negative | malignant solid tumor                | 4.23E-18 | 1770 |
| Mammary | Alfalfa | Negative | cancer                               | 4.23E-18 | 1788 |

|         |         |          |                                              |          |      |
|---------|---------|----------|----------------------------------------------|----------|------|
| gland   | hay     |          |                                              |          |      |
| Mammary | Alfalfa |          |                                              |          |      |
| gland   | hay     | Negative | morphology of cells                          | 1.04E-15 | 411  |
| Mammary | Alfalfa |          |                                              |          |      |
| gland   | hay     | Negative | organization of cytoplasm                    | 1.30E-13 | 330  |
| Mammary | Alfalfa |          |                                              |          |      |
| gland   | hay     | Negative | cell death                                   | 1.38E-13 | 632  |
| Mammary | Alfalfa |          |                                              |          |      |
| gland   | hay     | Negative | proliferation of cells                       | 1.98E-13 | 688  |
| Mammary | Alfalfa |          |                                              |          |      |
| gland   | hay     | Negative | organization of cytoskeleton                 | 4.15E-13 | 303  |
| Mammary | Alfalfa |          |                                              |          |      |
| gland   | hay     | Negative | tumorigenesis of tissue                      | 4.97E-12 | 1495 |
| Mammary | Alfalfa |          |                                              |          |      |
| gland   | hay     | Negative | apoptosis                                    | 1.11E-11 | 508  |
| Mammary | Alfalfa |          |                                              |          |      |
| gland   | hay     | Negative | neoplasia of epithelial tissue               | 1.48E-11 | 1470 |
| Mammary | Alfalfa |          |                                              |          |      |
| gland   | hay     | Negative | transport of molecule                        | 6.71E-11 | 331  |
| Mammary | Alfalfa |          |                                              |          |      |
| gland   | hay     | Negative | cell movement                                | 7.74E-11 | 418  |
| Mammary | Alfalfa |          |                                              |          |      |
| gland   | hay     | Negative | epithelial cancer                            | 9.72E-11 | 1452 |
| Mammary | Alfalfa |          |                                              |          |      |
| gland   | hay     | Negative | necrosis                                     | 1.21E-10 | 490  |
| Mammary | Alfalfa |          |                                              |          |      |
| gland   | hay     | Negative | microtubule dynamics                         | 1.64E-10 | 254  |
| Mammary | Alfalfa |          |                                              |          |      |
| gland   | hay     | Negative | development of vasculature                   | 9.99E-10 | 107  |
| Mammary | Alfalfa |          |                                              |          |      |
| gland   | hay     | Negative | morphology of cardiovascular system          | 3.69E-09 | 145  |
| Mammary | Alfalfa |          |                                              |          |      |
| gland   | hay     | Negative | Movement Disorders                           | 6.79E-09 | 225  |
| Mammary | Alfalfa |          |                                              |          |      |
| gland   | hay     | Negative | abnormal morphology of cells                 | 1.95E-08 | 259  |
| Mammary | Alfalfa |          |                                              |          |      |
| gland   | hay     | Negative | migration of cells                           | 4.78E-08 | 365  |
| Mammary | Alfalfa |          |                                              |          |      |
| gland   | hay     | Negative | differentiation of cells                     | 8.03E-08 | 421  |
| Mammary | Alfalfa |          |                                              |          |      |
| gland   | hay     | Negative | proliferation of connective tissue cells     | 1.71E-07 | 134  |
| Mammary | Alfalfa |          |                                              |          |      |
| gland   | hay     | Negative | abnormal morphology of cardiovascular system | 1.85E-07 | 129  |
| Mammary | Alfalfa | Negative | quantity of cells                            | 1.85E-07 | 339  |

|         |         |          |                                    |          |      |
|---------|---------|----------|------------------------------------|----------|------|
| gland   | hay     |          |                                    |          |      |
| Mammary | Alfalfa |          |                                    |          |      |
| gland   | hay     | Negative | transcription                      | 2.21E-07 | 376  |
| Mammary | Alfalfa |          |                                    |          |      |
| gland   | hay     | Negative | growth of connective tissue        | 2.23E-07 | 143  |
| Mammary | Alfalfa |          |                                    |          |      |
| gland   | hay     | Negative | formation of cellular protrusions  | 2.41E-07 | 190  |
| Mammary | Alfalfa |          |                                    |          |      |
| gland   | hay     | Negative | urination disorder                 | 2.61E-07 | 74   |
| Mammary | Alfalfa |          |                                    |          |      |
| gland   | hay     | Negative | abdominal neoplasm                 | 2.70E-07 | 1429 |
| Mammary | Alfalfa |          |                                    |          |      |
| gland   | hay     | Negative | transcription of RNA               | 3.19E-07 | 352  |
| Mammary | Alfalfa |          |                                    |          |      |
| gland   | hay     | Negative | cell viability                     | 3.79E-07 | 258  |
| Mammary | Alfalfa |          |                                    |          |      |
| gland   | hay     | Negative | cell death of tumor cell lines     | 9.49E-07 | 294  |
| Mammary | Alfalfa |          |                                    |          |      |
| gland   | hay     | Negative | cell movement of tumor cell lines  | 9.58E-07 | 178  |
| Mammary | Alfalfa |          |                                    |          |      |
| gland   | hay     | Negative | expression of RNA                  | 1.08E-06 | 396  |
| Mammary | Alfalfa |          |                                    |          |      |
| gland   | hay     | Negative | cell survival                      | 1.15E-06 | 271  |
| Mammary | Alfalfa |          |                                    |          |      |
| gland   | hay     | Negative | apoptosis of tumor cell lines      | 1.20E-06 | 240  |
| Mammary | Alfalfa |          |                                    |          |      |
| gland   | hay     | Negative | neuromuscular disease              | 1.20E-06 | 183  |
| Mammary | Alfalfa |          |                                    |          |      |
| gland   | hay     | Negative | angiogenesis                       | 1.31E-06 | 187  |
| Mammary | Alfalfa |          |                                    |          |      |
| gland   | hay     | Negative | Viral Infection                    | 1.46E-06 | 307  |
| Mammary | Alfalfa |          |                                    |          |      |
| gland   | hay     | Negative | ruffling                           | 1.50E-06 | 34   |
| Mammary | Alfalfa |          |                                    |          |      |
| gland   | hay     | Negative | morphology of vessel               | 1.51E-06 | 75   |
| Mammary | Alfalfa |          |                                    |          |      |
| gland   | hay     | Negative | abdominal cancer                   | 3.31E-06 | 1404 |
| Mammary | Alfalfa |          |                                    |          |      |
| gland   | hay     | Negative | cell viability of tumor cell lines | 3.76E-06 | 162  |
| Mammary | Alfalfa |          |                                    |          |      |
| gland   | hay     | Negative | morphology of blood vessel         | 3.88E-06 | 69   |
| Mammary | Alfalfa |          |                                    |          |      |
| gland   | hay     | Negative | growth of organism                 | 4.08E-06 | 172  |
| Mammary | Alfalfa | Negative | quantity of leukocytes             | 4.16E-06 | 186  |



|         |         |          |                                    |          |      |
|---------|---------|----------|------------------------------------|----------|------|
| gland   | hay     |          |                                    |          |      |
| Mammary | Alfalfa |          |                                    |          |      |
| gland   | hay     | Negative | synthesis of lipid                 | 4.33E-06 | 150  |
| Mammary | Alfalfa |          |                                    |          |      |
| gland   | hay     | Negative | vasculogenesis                     | 4.35E-06 | 154  |
| Mammary | Alfalfa |          |                                    |          |      |
| gland   | hay     | Negative | quantity of blood cells            | 4.75E-06 | 205  |
| Mammary | Alfalfa |          |                                    |          |      |
| gland   | hay     | Negative | organization of actin cytoskeleton | 5.86E-06 | 72   |
| Mammary | Alfalfa |          |                                    |          |      |
| gland   | hay     | Negative | metabolism of carbohydrate         | 7.32E-06 | 132  |
| Mammary | Alfalfa |          |                                    |          |      |
| gland   | hay     | Negative | necrosis of epithelial tissue      | 7.50E-06 | 126  |
| Mammary | Alfalfa |          |                                    |          |      |
| gland   | hay     | Negative | digestive organ tumor              | 7.72E-06 | 1233 |
| Mammary | Alfalfa |          |                                    |          |      |
| gland   | hay     | Negative | digestive system cancer            | 8.17E-06 | 1222 |
| Mammary | Alfalfa |          |                                    |          |      |
| gland   | hay     | Negative | benign neoplasia                   | 8.22E-06 | 186  |
| Mammary | Alfalfa |          |                                    |          |      |
| gland   | hay     | Negative | cellular homeostasis               | 1.11E-05 | 286  |
| Mammary | Alfalfa |          |                                    |          |      |
| gland   | hay     | Negative | dyskinesia                         | 1.35E-05 | 130  |
| Mammary | Alfalfa |          |                                    |          |      |
| gland   | hay     | Negative | leukocyte migration                | 1.70E-05 | 175  |
| Mammary | Alfalfa |          |                                    |          |      |
| gland   | hay     | Negative | transcription of DNA               | 1.77E-05 | 287  |
| Mammary | Alfalfa |          |                                    |          |      |
| gland   | hay     | Negative | formation of skin                  | 1.77E-05 | 83   |
| Mammary | Alfalfa |          |                                    |          |      |
| gland   | hay     | Negative | proliferation of tumor cell lines  | 1.77E-05 | 289  |
| Mammary | Alfalfa |          |                                    |          |      |
| gland   | hay     | Negative | seizures                           | 1.92E-05 | 89   |
| Mammary | Alfalfa |          |                                    |          |      |
| gland   | hay     | Negative | proteinuria                        | 1.93E-05 | 43   |
| Mammary | Alfalfa |          |                                    |          |      |
| gland   | hay     | Negative | disorder of basal ganglia          | 2.01E-05 | 156  |
| Mammary | Alfalfa |          |                                    |          |      |
| gland   | hay     | Negative | invasion of carcinoma cell lines   | 2.01E-05 | 50   |
| Mammary | Alfalfa |          |                                    |          |      |
| gland   | hay     | Negative | invasion of cells                  | 2.05E-05 | 174  |
| Mammary | Alfalfa |          |                                    |          |      |
| gland   | hay     | Negative | neurological signs                 | 2.31E-05 | 135  |
| Mammary | Alfalfa | Negative | growth of epithelial tissue        | 2.50E-05 | 140  |

|         |         |          |                                          |          |     |
|---------|---------|----------|------------------------------------------|----------|-----|
| gland   | hay     |          |                                          |          |     |
| Mammary | Alfalfa |          |                                          |          |     |
| gland   | hay     | Negative | development of body trunk                | 3.65E-05 | 215 |
| Mammary | Alfalfa |          |                                          |          |     |
| gland   | hay     | Negative | cell death of epithelial cells           | 3.77E-05 | 106 |
| Mammary | Alfalfa |          |                                          |          |     |
| gland   | hay     | Negative | seizure disorder                         | 3.77E-05 | 101 |
| Mammary | Alfalfa |          |                                          |          |     |
| gland   | hay     | Negative | morphology of heart                      | 3.83E-05 | 89  |
| Mammary | Alfalfa |          |                                          |          |     |
| gland   | hay     | Negative | proliferation of fibroblasts             | 4.02E-05 | 79  |
| Mammary | Alfalfa |          |                                          |          |     |
| gland   | hay     | Negative | Huntington's Disease                     | 4.02E-05 | 120 |
| Mammary | Alfalfa |          |                                          |          |     |
| gland   | hay     | Negative | growth of embryo                         | 4.35E-05 | 102 |
| Mammary | Alfalfa |          |                                          |          |     |
| gland   | hay     | Negative | Growth Failure                           | 4.73E-05 | 124 |
| Mammary | Alfalfa |          |                                          |          |     |
| gland   | hay     | Negative | cellular infiltration                    | 6.89E-05 | 94  |
| Mammary | Alfalfa |          |                                          |          |     |
| gland   | hay     | Negative | cell death of connective tissue cells    | 7.04E-05 | 124 |
| Mammary | Alfalfa |          |                                          |          |     |
| gland   | hay     | Negative | abnormal morphology of embryonic tissue  | 7.20E-05 | 114 |
| Mammary | Alfalfa |          |                                          |          |     |
| gland   | hay     | Negative | abnormal morphology of thoracic cavity   | 7.20E-05 | 121 |
| Mammary | Alfalfa |          |                                          |          |     |
| gland   | hay     | Negative | Fibrosis                                 | 7.88E-05 | 111 |
| Mammary | Alfalfa |          |                                          |          |     |
| gland   | hay     | Negative | abnormal morphology of epithelial tissue | 8.55E-05 | 90  |
| Mammary | Alfalfa |          |                                          |          |     |
| gland   | hay     | Negative | migration of tumor cell lines            | 8.68E-05 | 142 |
| Mammary | Alfalfa |          |                                          |          |     |
| gland   | hay     | Negative | abnormal morphology of blood vessel      | 1.01E-04 | 61  |
| Mammary | Alfalfa |          |                                          |          |     |
| gland   | hay     | Negative | endocytosis                              | 1.01E-04 | 76  |
| Mammary | Alfalfa |          |                                          |          |     |
| gland   | hay     | Negative | synthesis of nitric oxide                | 1.10E-04 | 63  |
| Mammary | Alfalfa |          |                                          |          |     |
| gland   | hay     | Negative | cell movement of leukocytes              | 1.11E-04 | 152 |
| Mammary | Alfalfa |          |                                          |          |     |
| gland   | hay     | Negative | cell death of epithelial cell lines      | 1.18E-04 | 64  |
| Mammary | Alfalfa |          |                                          |          |     |
| gland   | hay     | Negative | accumulation of cells                    | 1.24E-04 | 77  |
| Mammary | Alfalfa | Negative | neuritogenesis                           | 1.37E-04 | 119 |

|         |         |          |                                                 |          |     |
|---------|---------|----------|-------------------------------------------------|----------|-----|
| gland   | hay     |          |                                                 |          |     |
| Mammary | Alfalfa |          |                                                 |          |     |
| gland   | hay     | Negative | formation of plasma membrane projections        | 1.65E-04 | 121 |
| Mammary | Alfalfa |          |                                                 |          |     |
| gland   | hay     | Negative | proliferation of hematopoietic progenitor cells | 1.65E-04 | 56  |
| Mammary | Alfalfa |          |                                                 |          |     |
| gland   | hay     | Negative | transport of alpha-amino acid                   | 1.66E-04 | 22  |
| Mammary | Alfalfa |          |                                                 |          |     |
| gland   | hay     | Negative | proliferation of smooth muscle cells            | 1.70E-04 | 64  |
| Mammary | Alfalfa |          |                                                 |          |     |
| gland   | hay     | Negative | reorganization of cytoskeleton                  | 1.89E-04 | 46  |
| Mammary | Alfalfa |          |                                                 |          |     |
| gland   | hay     | Negative | proliferation of hematopoietic cells            | 1.99E-04 | 58  |
| Mammary | Alfalfa |          |                                                 |          |     |
| gland   | hay     | Negative | size of body                                    | 2.08E-04 | 165 |
| Mammary | Alfalfa |          |                                                 |          |     |
| gland   | hay     | Negative | morphology of bone                              | 2.18E-04 | 94  |
| Mammary | Alfalfa |          |                                                 |          |     |
| gland   | hay     | Negative | dysgenesis                                      | 2.36E-04 | 110 |
| Mammary | Alfalfa |          |                                                 |          |     |
| gland   | hay     | Negative | formation of thymus gland                       | 2.58E-04 | 40  |
| Mammary | Alfalfa |          |                                                 |          |     |
| gland   | hay     | Negative | neuronal cell death                             | 2.58E-04 | 135 |
| Mammary | Alfalfa |          |                                                 |          |     |
| gland   | hay     | Negative | morphogenesis of neurons                        | 2.72E-04 | 89  |
| Mammary | Alfalfa |          |                                                 |          |     |
| gland   | hay     | Negative | synthesis of carbohydrate                       | 2.72E-04 | 89  |
| Mammary | Alfalfa |          |                                                 |          |     |
| gland   | hay     | Negative | invasion of tumor cell lines                    | 2.72E-04 | 132 |
| Mammary | Alfalfa |          |                                                 |          |     |
| gland   | hay     | Negative | cell death of phagocytes                        | 2.76E-04 | 49  |
| Mammary | Alfalfa |          |                                                 |          |     |
| gland   | hay     | Negative | abnormal morphology of bone                     | 2.76E-04 | 91  |
| Mammary | Alfalfa |          |                                                 |          |     |
| gland   | hay     | Negative | function of blood cells                         | 2.76E-04 | 118 |
| Mammary | Alfalfa |          |                                                 |          |     |
| gland   | hay     | Negative | adhesion of immune cells                        | 2.79E-04 | 75  |
| Mammary | Alfalfa |          |                                                 |          |     |
| gland   | hay     | Negative | organization of filaments                       | 2.98E-04 | 48  |
| Mammary | Alfalfa |          |                                                 |          |     |
| gland   | hay     | Negative | concentration of lipid                          | 3.07E-04 | 157 |
| Mammary | Alfalfa |          |                                                 |          |     |
| gland   | hay     | Negative | quantity of lymphocytes                         | 3.07E-04 | 139 |
| Mammary | Alfalfa | Negative | Organ Degeneration                              | 3.14E-04 | 101 |

|         |         |          |                                           |          |     |
|---------|---------|----------|-------------------------------------------|----------|-----|
| gland   | hay     |          |                                           |          |     |
| Mammary | Alfalfa |          |                                           |          |     |
| gland   | hay     | Negative | abnormal morphology of heart              | 3.14E-04 | 81  |
| Mammary | Alfalfa |          |                                           |          |     |
| gland   | hay     | Negative | perinatal death                           | 3.14E-04 | 119 |
| Mammary | Alfalfa |          |                                           |          |     |
| gland   | hay     | Negative | Hypoplasia                                | 3.14E-04 | 103 |
| Mammary | Alfalfa |          |                                           |          |     |
| gland   | hay     | Negative | cell death of fibroblasts                 | 3.16E-04 | 59  |
| Mammary | Alfalfa |          |                                           |          |     |
| gland   | hay     | Negative | proliferation of embryonic cells          | 3.25E-04 | 56  |
| Mammary | Alfalfa |          |                                           |          |     |
| gland   | hay     | Negative | transactivation                           | 3.27E-04 | 116 |
| Mammary | Alfalfa |          |                                           |          |     |
| gland   | hay     | Negative | formation of cells                        | 3.32E-04 | 186 |
| Mammary | Alfalfa |          |                                           |          |     |
| gland   | hay     | Negative | proliferation of bone marrow cells        | 3.47E-04 | 31  |
| Mammary | Alfalfa |          |                                           |          |     |
| gland   | hay     | Negative | cell movement of myeloid cells            | 3.57E-04 | 109 |
| Mammary | Alfalfa |          |                                           |          |     |
| gland   | hay     | Negative | development of cytoplasm                  | 3.57E-04 | 95  |
| Mammary | Alfalfa |          |                                           |          |     |
| gland   | hay     | Negative | proliferation of fibroblast cell lines    | 3.58E-04 | 88  |
| Mammary | Alfalfa |          |                                           |          |     |
| gland   | hay     | Negative | accumulation of lipid                     | 3.85E-04 | 65  |
| Mammary | Alfalfa |          |                                           |          |     |
| gland   | hay     | Negative | function of cardiovascular system         | 3.91E-04 | 78  |
| Mammary | Alfalfa |          |                                           |          |     |
| gland   | hay     | Negative | cell death of pheochromocytoma cell lines | 3.94E-04 | 31  |
| Mammary | Alfalfa |          |                                           |          |     |
| gland   | hay     | Negative | adenoma                                   | 3.94E-04 | 111 |
| Mammary | Alfalfa |          |                                           |          |     |
| gland   | hay     | Negative | function of leukocytes                    | 4.43E-04 | 108 |
| Mammary | Alfalfa |          |                                           |          |     |
| gland   | hay     | Negative | apoptosis of neutrophils                  | 4.44E-04 | 19  |
| Mammary | Alfalfa |          |                                           |          |     |
| gland   | hay     | Negative | cellular infiltration by leukocytes       | 4.50E-04 | 81  |
| Mammary | Alfalfa |          |                                           |          |     |
| gland   | hay     | Negative | metabolism of membrane lipid derivative   | 4.50E-04 | 81  |
| Mammary | Alfalfa |          |                                           |          |     |
| gland   | hay     | Negative | adhesion of blood cells                   | 4.55E-04 | 79  |
| Mammary | Alfalfa |          |                                           |          |     |
| gland   | hay     | Negative | cell death of embryonic cells             | 4.59E-04 | 30  |
| Mammary | Alfalfa | Negative | apoptosis of phagocytes                   | 4.70E-04 | 44  |

|         |         |          |                                         |          |     |
|---------|---------|----------|-----------------------------------------|----------|-----|
| gland   | hay     |          |                                         |          |     |
| Mammary | Alfalfa |          |                                         |          |     |
| gland   | hay     | Negative | transmigration of cells                 | 4.70E-04 | 38  |
| Mammary | Alfalfa |          |                                         |          |     |
| gland   | hay     | Negative | organization of organelle               | 5.11E-04 | 108 |
| Mammary | Alfalfa |          |                                         |          |     |
| gland   | hay     | Negative | secretion of molecule                   | 5.43E-04 | 110 |
| Mammary | Alfalfa |          |                                         |          |     |
| gland   | hay     | Negative | homing of cells                         | 5.75E-04 | 111 |
| Mammary | Alfalfa |          |                                         |          |     |
| gland   | hay     | Negative | development of hematopoietic system     | 5.94E-04 | 55  |
| Mammary | Alfalfa |          |                                         |          |     |
| gland   | hay     | Negative | long-term potentiation                  | 5.99E-04 | 54  |
| Mammary | Alfalfa |          |                                         |          |     |
| gland   | hay     | Negative | proliferation of lymphatic system cells | 6.01E-04 | 46  |
| Mammary | Alfalfa |          |                                         |          |     |
| gland   | hay     | Negative | degeneration of nervous system          | 6.01E-04 | 62  |
| Mammary | Alfalfa |          |                                         |          |     |
| gland   | hay     | Negative | morphology of head                      | 6.03E-04 | 166 |
| Mammary | Alfalfa |          |                                         |          |     |
| gland   | hay     | Negative | migration of mesenchymal stem cells     | 6.21E-04 | 11  |
| Mammary | Alfalfa |          |                                         |          |     |
| gland   | hay     | Negative | cellular infiltration of cells          | 6.27E-04 | 82  |
| Mammary | Alfalfa |          |                                         |          |     |
| gland   | hay     | Negative | quantity of embryonic cells             | 6.28E-04 | 22  |
| Mammary | Alfalfa |          |                                         |          |     |
| gland   | hay     | Negative | cell movement of endothelial cells      | 6.71E-04 | 74  |
| Mammary | Alfalfa |          |                                         |          |     |
| gland   | hay     | Negative | proliferation of epithelial cells       | 6.76E-04 | 99  |
| Mammary | Alfalfa |          |                                         |          |     |
| gland   | hay     | Negative | cell movement of muscle cells           | 6.76E-04 | 42  |
| Mammary | Alfalfa |          |                                         |          |     |
| gland   | hay     | Negative | migration of muscle cells               | 6.80E-04 | 39  |
| Mammary | Alfalfa |          |                                         |          |     |
| gland   | hay     | Negative | cell movement of phagocytes             | 6.80E-04 | 109 |
| Mammary | Alfalfa |          |                                         |          |     |
| gland   | hay     | Negative | transactivation of RNA                  | 6.80E-04 | 108 |
| Mammary | Alfalfa |          |                                         |          |     |
| gland   | hay     | Negative | proliferation of muscle cells           | 7.10E-04 | 77  |
| Mammary | Alfalfa |          |                                         |          |     |
| gland   | hay     | Negative | cell death of myeloid cells             | 7.10E-04 | 48  |
| Mammary | Alfalfa |          |                                         |          |     |
| gland   | hay     | Negative | cell death of kidney cells              | 7.28E-04 | 73  |
| Mammary | Alfalfa | Negative | autosomal recessive disease             | 7.31E-04 | 173 |

|         |         |          |                                          |          |     |
|---------|---------|----------|------------------------------------------|----------|-----|
| gland   | hay     |          |                                          |          |     |
| Mammary | Alfalfa |          |                                          |          |     |
| gland   | hay     | Negative | protein kinase cascade                   | 7.31E-04 | 86  |
| Mammary | Alfalfa |          |                                          |          |     |
| gland   | hay     | Negative | accumulation of macrophages              | 7.31E-04 | 22  |
| Mammary | Alfalfa |          |                                          |          |     |
| gland   | hay     | Negative | cell cycle progression                   | 7.31E-04 | 194 |
| Mammary | Alfalfa |          |                                          |          |     |
| gland   | hay     | Negative | formation of filopodia                   | 7.35E-04 | 39  |
| Mammary | Alfalfa |          |                                          |          |     |
| gland   | hay     | Negative | morphology of connective tissue          | 7.35E-04 | 93  |
| Mammary | Alfalfa |          |                                          |          |     |
| gland   | hay     | Negative | homing                                   | 7.64E-04 | 113 |
| Mammary | Alfalfa |          |                                          |          |     |
| gland   | hay     | Negative | binding of mononuclear leukocytes        | 7.85E-04 | 29  |
| Mammary | Alfalfa |          |                                          |          |     |
| gland   | hay     | Negative | quantity of mononuclear leukocytes       | 7.91E-04 | 141 |
| Mammary | Alfalfa |          |                                          |          |     |
| gland   | hay     | Negative | transport of L-amino acid                | 7.92E-04 | 19  |
| Mammary | Alfalfa |          |                                          |          |     |
| gland   | hay     | Negative | apoptosis of connective tissue cells     | 7.95E-04 | 63  |
| Mammary | Alfalfa |          |                                          |          |     |
| gland   | hay     | Negative | cell death of cervical cancer cell lines | 7.95E-04 | 73  |
| Mammary | Alfalfa |          |                                          |          |     |
| gland   | hay     | Negative | concentration of fatty acid              | 7.95E-04 | 60  |
| Mammary | Alfalfa |          |                                          |          |     |
| gland   | hay     | Negative | morphology of reproductive system        | 7.95E-04 | 106 |
| Mammary | Alfalfa |          |                                          |          |     |
| gland   | hay     | Negative | proliferation of neuronal cells          | 8.78E-04 | 113 |
| Mammary | Alfalfa |          |                                          |          |     |
| gland   | hay     | Negative | apoptosis of myeloid cells               | 8.82E-04 | 43  |
| Mammary | Alfalfa |          |                                          |          |     |
| gland   | hay     | Negative | morphogenesis of neurites                | 8.93E-04 | 85  |
| Mammary | Alfalfa |          |                                          |          |     |
| gland   | hay     | Negative | epileptic seizure                        | 8.95E-04 | 39  |
| Mammary | Alfalfa |          |                                          |          |     |
| gland   | hay     | Negative | Bleeding                                 | 8.96E-04 | 86  |
| Mammary | Alfalfa |          |                                          |          |     |
| gland   | hay     | Negative | binding of endothelial cells             | 9.21E-04 | 27  |
| Mammary | Alfalfa |          |                                          |          |     |
| gland   | hay     | Negative | oral cancer                              | 9.64E-04 | 50  |
| Mammary | Alfalfa |          |                                          |          |     |
| gland   | hay     | Negative | morphology of body cavity                | 1.07E-03 | 217 |
| Mammary | Alfalfa | Negative | cell death of macrophages                | 1.07E-03 | 31  |

|         |         |          |                                            |          |     |
|---------|---------|----------|--------------------------------------------|----------|-----|
| gland   | hay     |          |                                            |          |     |
| Mammary | Alfalfa |          |                                            |          |     |
| gland   | hay     | Negative | apoptosis of macrophages                   | 1.07E-03 | 27  |
| Mammary | Alfalfa |          |                                            |          |     |
| gland   | hay     | Negative | formation of vessel component              | 1.07E-03 | 20  |
| Mammary | Alfalfa |          |                                            |          |     |
| gland   | hay     | Negative | development of neurons                     | 1.13E-03 | 148 |
| Mammary | Alfalfa |          |                                            |          |     |
| gland   | hay     | Negative | cell transformation                        | 1.13E-03 | 92  |
| Mammary | Alfalfa |          |                                            |          |     |
| gland   | hay     | Negative | congenital malformation of brain           | 1.15E-03 | 63  |
| Mammary | Alfalfa |          |                                            |          |     |
| gland   | hay     | Negative | migration of smooth muscle cells           | 1.22E-03 | 35  |
| Mammary | Alfalfa |          |                                            |          |     |
| gland   | hay     | Negative | chronic myeloid leukemia                   | 1.25E-03 | 27  |
| Mammary | Alfalfa |          |                                            |          |     |
| gland   | hay     | Negative | accumulation of antigen presenting cells   | 1.26E-03 | 23  |
| Mammary | Alfalfa |          |                                            |          |     |
| gland   | hay     | Negative | accumulation of myeloid cells              | 1.26E-03 | 40  |
| Mammary | Alfalfa |          |                                            |          |     |
| gland   | hay     | Negative | activation of antigen presenting cells     | 1.28E-03 | 66  |
| Mammary | Alfalfa |          |                                            |          |     |
| gland   | hay     | Negative | quantity of cellular protrusions           | 1.30E-03 | 37  |
| Mammary | Alfalfa |          |                                            |          |     |
| gland   | hay     | Negative | secretory pathway                          | 1.30E-03 | 44  |
| Mammary | Alfalfa |          |                                            |          |     |
| gland   | hay     | Negative | survival of organism                       | 1.30E-03 | 134 |
| Mammary | Alfalfa |          |                                            |          |     |
| gland   | hay     | Negative | synthesis of fatty acid                    | 1.31E-03 | 65  |
| Mammary | Alfalfa |          |                                            |          |     |
| gland   | hay     | Negative | hypersensitive reaction                    | 1.34E-03 | 86  |
| Mammary | Alfalfa |          |                                            |          |     |
| gland   | hay     | Negative | abnormal morphology of head                | 1.34E-03 | 156 |
| Mammary | Alfalfa |          |                                            |          |     |
| gland   | hay     | Negative | hypoplasia of organ                        | 1.37E-03 | 89  |
| Mammary | Alfalfa |          |                                            |          |     |
| gland   | hay     | Negative | accumulation of blood cells                | 1.38E-03 | 59  |
| Mammary | Alfalfa |          |                                            |          |     |
| gland   | hay     | Negative | abnormal morphology of reproductive system | 1.40E-03 | 100 |
| Mammary | Alfalfa |          |                                            |          |     |
| gland   | hay     | Negative | cell death of brain                        | 1.51E-03 | 61  |
| Mammary | Alfalfa |          |                                            |          |     |
| gland   | hay     | Negative | oral squamous cell carcinoma               | 1.52E-03 | 40  |
| Mammary | Alfalfa | Negative | quantity of interleukin                    | 1.53E-03 | 33  |

|         |         |          |                                               |          |     |
|---------|---------|----------|-----------------------------------------------|----------|-----|
| gland   | hay     |          |                                               |          |     |
| Mammary | Alfalfa |          |                                               |          |     |
| gland   | hay     | Negative | chemotaxis of cells                           | 1.54E-03 | 103 |
| Mammary | Alfalfa |          |                                               |          |     |
| gland   | hay     | Negative | cell movement of vascular smooth muscle cells | 1.55E-03 | 28  |
| Mammary | Alfalfa |          |                                               |          |     |
| gland   | hay     | Negative | phosphorylation of protein                    | 1.55E-03 | 139 |
| Mammary | Alfalfa |          |                                               |          |     |
| gland   | hay     | Negative | cell movement of smooth muscle cells          | 1.57E-03 | 37  |
| Mammary | Alfalfa |          |                                               |          |     |
| gland   | hay     | Negative | chemotaxis                                    | 1.59E-03 | 106 |
| Mammary | Alfalfa |          |                                               |          |     |
| gland   | hay     | Negative | cognition                                     | 1.60E-03 | 90  |
| Mammary | Alfalfa |          |                                               |          |     |
| gland   | hay     | Negative | congenital anomaly of musculoskeletal system  | 1.60E-03 | 139 |
| Mammary | Alfalfa |          |                                               |          |     |
| gland   | hay     | Negative | necrosis of kidney                            | 1.61E-03 | 74  |
| Mammary | Alfalfa |          |                                               |          |     |
| gland   | hay     | Negative | killing of cells                              | 1.62E-03 | 47  |
| Mammary | Alfalfa |          |                                               |          |     |
| gland   | hay     | Negative | activation of DNA endogenous promoter         | 1.62E-03 | 218 |
| Mammary | Alfalfa |          |                                               |          |     |
| gland   | hay     | Negative | apoptosis of cervical cancer cell lines       | 1.69E-03 | 59  |
| Mammary | Alfalfa |          |                                               |          |     |
| gland   | hay     | Negative | development of connective tissue              | 1.74E-03 | 75  |
| Mammary | Alfalfa |          |                                               |          |     |
| gland   | hay     | Negative | formation of vascular lesion                  | 1.74E-03 | 28  |
| Mammary | Alfalfa |          |                                               |          |     |
| gland   | hay     | Negative | polyneuropathy                                | 1.81E-03 | 27  |
| Mammary | Alfalfa |          |                                               |          |     |
| gland   | hay     | Negative | apoptosis of hepatoma cell lines              | 1.81E-03 | 35  |
| Mammary | Alfalfa |          |                                               |          |     |
| gland   | hay     | Negative | activation of enzyme                          | 1.81E-03 | 78  |
| Mammary | Alfalfa |          |                                               |          |     |
| gland   | hay     | Negative | cell movement of antigen presenting cells     | 1.82E-03 | 71  |
| Mammary | Alfalfa |          |                                               |          |     |
| gland   | hay     | Negative | skin abnormality                              | 1.85E-03 | 49  |
| Mammary | Alfalfa |          |                                               |          |     |
| gland   | hay     | Negative | Hypertrophy                                   | 1.86E-03 | 93  |
| Mammary | Alfalfa |          |                                               |          |     |
| gland   | hay     | Negative | synthesis of DNA                              | 1.89E-03 | 83  |
| Mammary | Alfalfa |          |                                               |          |     |
| gland   | hay     | Negative | binding of lymphocytes                        | 1.92E-03 | 24  |
| Mammary | Alfalfa | Negative | Dermatitis                                    | 1.92E-03 | 86  |



|         |         |          |                                               |          |     |
|---------|---------|----------|-----------------------------------------------|----------|-----|
| gland   | hay     |          |                                               |          |     |
| Mammary | Alfalfa |          |                                               |          |     |
| gland   | hay     | Negative | response of mononuclear leukocytes            | 1.96E-03 | 50  |
| Mammary | Alfalfa |          |                                               |          |     |
| gland   | hay     | Negative | development of leukocytes                     | 1.96E-03 | 113 |
| Mammary | Alfalfa |          |                                               |          |     |
| gland   | hay     | Negative | exocytosis                                    | 1.96E-03 | 42  |
| Mammary | Alfalfa |          |                                               |          |     |
| gland   | hay     | Negative | cell movement of breast cancer cell lines     | 1.98E-03 | 60  |
| Mammary | Alfalfa |          |                                               |          |     |
| gland   | hay     | Negative | migration of endothelial cells                | 1.98E-03 | 67  |
| Mammary | Alfalfa |          |                                               |          |     |
| gland   | hay     | Negative | formation of neointima                        | 1.98E-03 | 19  |
| Mammary | Alfalfa |          |                                               |          |     |
| gland   | hay     | Negative | cell death of brain cells                     | 2.02E-03 | 57  |
| Mammary | Alfalfa |          |                                               |          |     |
| gland   | hay     | Negative | abnormal morphology of zona fasciculata       | 2.03E-03 | 7   |
| Mammary | Alfalfa |          |                                               |          |     |
| gland   | hay     | Negative | activation of female germ cells               | 2.04E-03 | 6   |
| Mammary | Alfalfa |          |                                               |          |     |
| gland   | hay     | Negative | development of lymphatic system               | 2.04E-03 | 72  |
| Mammary | Alfalfa |          |                                               |          |     |
| gland   | hay     | Negative | formation of thymocytes                       | 2.06E-03 | 26  |
| Mammary | Alfalfa |          |                                               |          |     |
| gland   | hay     | Negative | cell death of cerebral cortex cells           | 2.12E-03 | 49  |
| Mammary | Alfalfa |          |                                               |          |     |
| gland   | hay     | Negative | apoptosis of epithelial cell lines            | 2.16E-03 | 48  |
| Mammary | Alfalfa |          |                                               |          |     |
| gland   | hay     | Negative | formation of T lymphocytes                    | 2.17E-03 | 28  |
| Mammary | Alfalfa |          |                                               |          |     |
| gland   | hay     | Negative | cell death of embryonic cell lines            | 2.19E-03 | 51  |
| Mammary | Alfalfa |          |                                               |          |     |
| gland   | hay     | Negative | morphology of nervous system                  | 2.21E-03 | 146 |
| Mammary | Alfalfa |          |                                               |          |     |
| gland   | hay     | Negative | differentiation of leukocytes                 | 2.22E-03 | 127 |
| Mammary | Alfalfa |          |                                               |          |     |
| gland   | hay     | Negative | binding of leukocytes                         | 2.31E-03 | 40  |
| Mammary | Alfalfa |          |                                               |          |     |
| gland   | hay     | Negative | quantity of metal ion                         | 2.33E-03 | 87  |
| Mammary | Alfalfa |          |                                               |          |     |
| gland   | hay     | Negative | abnormal morphology of skull                  | 2.38E-03 | 47  |
| Mammary | Alfalfa |          |                                               |          |     |
| gland   | hay     | Negative | proliferation of vascular smooth muscle cells | 2.39E-03 | 35  |
| Mammary | Alfalfa | Negative | vascularization                               | 2.42E-03 | 50  |

|         |         |          |                                            |          |     |
|---------|---------|----------|--------------------------------------------|----------|-----|
| gland   | hay     |          |                                            |          |     |
| Mammary | Alfalfa |          |                                            |          |     |
| gland   | hay     | Negative | cell death of gonadal cell lines           | 2.45E-03 | 20  |
| Mammary | Alfalfa |          |                                            |          |     |
| gland   | hay     | Negative | glomerulosclerosis                         | 2.45E-03 | 30  |
| Mammary | Alfalfa |          |                                            |          |     |
| gland   | hay     | Negative | cell movement of neutrophils               | 2.45E-03 | 61  |
| Mammary | Alfalfa |          |                                            |          |     |
| gland   | hay     | Negative | cell movement of granulocytes              | 2.48E-03 | 74  |
| Mammary | Alfalfa |          |                                            |          |     |
| gland   | hay     | Negative | cell viability of carcinoma cell lines     | 2.48E-03 | 33  |
| Mammary | Alfalfa |          |                                            |          |     |
| gland   | hay     | Negative | synthesis of phospholipid                  | 2.48E-03 | 39  |
| Mammary | Alfalfa |          |                                            |          |     |
| gland   | hay     | Negative | quantity of IL-6 in blood                  | 2.51E-03 | 22  |
| Mammary | Alfalfa |          |                                            |          |     |
| gland   | hay     | Negative | cell death of central nervous system cells | 2.51E-03 | 60  |
| Mammary | Alfalfa |          |                                            |          |     |
| gland   | hay     | Negative | formation of lymphatic system component    | 2.51E-03 | 60  |
| Mammary | Alfalfa |          |                                            |          |     |
| gland   | hay     | Negative | ubiquitination                             | 2.51E-03 | 68  |
| Mammary | Alfalfa |          |                                            |          |     |
| gland   | hay     | Negative | development of lymphatic system component  | 2.53E-03 | 63  |
| Mammary | Alfalfa |          |                                            |          |     |
| gland   | hay     | Negative | transport of glutamine family amino acid   | 2.53E-03 | 16  |
| Mammary | Alfalfa |          |                                            |          |     |
| gland   | hay     | Negative | development of genitourinary system        | 2.53E-03 | 163 |
| Mammary | Alfalfa |          |                                            |          |     |
| gland   | hay     | Negative | cell viability of muscle cells             | 2.55E-03 | 18  |
| Mammary | Alfalfa |          |                                            |          |     |
| gland   | hay     | Negative | formation of lymphoid organ                | 2.55E-03 | 55  |
| Mammary | Alfalfa |          |                                            |          |     |
| gland   | hay     | Negative | allergy                                    | 2.55E-03 | 80  |
| Mammary | Alfalfa |          |                                            |          |     |
| gland   | hay     | Negative | proliferation of hepatoma cell lines       | 2.63E-03 | 43  |
| Mammary | Alfalfa |          |                                            |          |     |
| gland   | hay     | Negative | killing of macrophages                     | 2.63E-03 | 8   |
| Mammary | Alfalfa |          |                                            |          |     |
| gland   | hay     | Negative | fatty acid metabolism                      | 2.74E-03 | 114 |
| Mammary | Alfalfa |          |                                            |          |     |
| gland   | hay     | Negative | ruffling of plasma membrane                | 2.79E-03 | 14  |
| Mammary | Alfalfa |          |                                            |          |     |
| gland   | hay     | Negative | damage of cellular membrane                | 2.82E-03 | 9   |
| Mammary | Alfalfa | Negative | homeostasis of leukocytes                  | 2.82E-03 | 106 |

|         |         |          |                                          |          |     |
|---------|---------|----------|------------------------------------------|----------|-----|
| gland   | hay     |          |                                          |          |     |
| Mammary | Alfalfa |          |                                          |          |     |
| gland   | hay     | Negative | apoptosis of pheochromocytoma cell lines | 2.82E-03 | 23  |
| Mammary | Alfalfa |          |                                          |          |     |
| gland   | hay     | Negative | learning                                 | 2.88E-03 | 82  |
| Mammary | Alfalfa |          |                                          |          |     |
| gland   | hay     | Negative | cell movement of fibroblasts             | 2.92E-03 | 40  |
| Mammary | Alfalfa |          |                                          |          |     |
| gland   | hay     | Negative | transport of metal                       | 2.92E-03 | 67  |
| Mammary | Alfalfa |          |                                          |          |     |
| gland   | hay     | Negative | heart rate                               | 2.93E-03 | 57  |
| Mammary | Alfalfa |          |                                          |          |     |
| gland   | hay     | Negative | apoptosis of melanoma cell lines         | 2.97E-03 | 30  |
| Mammary | Alfalfa |          |                                          |          |     |
| gland   | hay     | Negative | reorganization of actin cytoskeleton     | 2.97E-03 | 30  |
| Mammary | Alfalfa |          |                                          |          |     |
| gland   | hay     | Negative | development of head                      | 2.97E-03 | 178 |
| Mammary | Alfalfa |          |                                          |          |     |
| gland   | hay     | Negative | infection by Retroviridae                | 2.98E-03 | 134 |
| Mammary | Alfalfa |          |                                          |          |     |
| gland   | hay     | Negative | apoptosis of neurons                     | 3.02E-03 | 85  |
| Mammary | Alfalfa |          |                                          |          |     |
| gland   | hay     | Negative | cell movement of carcinoma cell lines    | 3.02E-03 | 44  |
| Mammary | Alfalfa |          |                                          |          |     |
| gland   | hay     | Negative | inflammatory response                    | 3.04E-03 | 144 |
| Mammary | Alfalfa |          |                                          |          |     |
| gland   | hay     | Negative | cell movement of connective tissue cells | 3.10E-03 | 47  |
| Mammary | Alfalfa |          |                                          |          |     |
| gland   | hay     | Negative | cell death of antigen presenting cells   | 3.10E-03 | 36  |
| Mammary | Alfalfa |          |                                          |          |     |
| gland   | hay     | Negative | abnormal morphology of body cavity       | 3.13E-03 | 204 |
| Mammary | Alfalfa |          |                                          |          |     |
| gland   | hay     | Negative | binding of T lymphocytes                 | 3.13E-03 | 19  |
| Mammary | Alfalfa |          |                                          |          |     |
| gland   | hay     | Negative | inflammation of blood vessel             | 3.13E-03 | 11  |
| Mammary | Alfalfa |          |                                          |          |     |
| gland   | hay     | Negative | cell death of melanoma cell lines        | 3.14E-03 | 52  |
| Mammary | Alfalfa |          |                                          |          |     |
| gland   | hay     | Negative | metabolism of phospholipid               | 3.16E-03 | 49  |
| Mammary | Alfalfa |          |                                          |          |     |
| gland   | hay     | Negative | transport of ion                         | 3.20E-03 | 97  |
| Mammary | Alfalfa |          |                                          |          |     |
| gland   | hay     | Negative | transport of cation                      | 3.25E-03 | 79  |
| Mammary | Alfalfa | Negative | formation of vesicles                    | 3.30E-03 | 28  |

|         |         |          |                                                |          |     |
|---------|---------|----------|------------------------------------------------|----------|-----|
| gland   | hay     |          |                                                |          |     |
| Mammary | Alfalfa |          |                                                |          |     |
| gland   | hay     | Negative | morphology of endothelial cells                | 3.31E-03 | 17  |
| Mammary | Alfalfa |          |                                                |          |     |
| gland   | hay     | Negative | necrosis of tumor                              | 3.34E-03 | 75  |
| Mammary | Alfalfa |          |                                                |          |     |
| gland   | hay     | Negative | transport of inorganic cation                  | 3.35E-03 | 70  |
| Mammary | Alfalfa |          |                                                |          |     |
| gland   | hay     | Negative | apoptosis of cardiomyocytes                    | 3.37E-03 | 40  |
| Mammary | Alfalfa |          |                                                |          |     |
| gland   | hay     | Negative | organization of actin filaments                | 3.37E-03 | 25  |
| Mammary | Alfalfa |          |                                                |          |     |
| gland   | hay     | Negative | quantity of carbohydrate                       | 3.45E-03 | 99  |
| Mammary | Alfalfa |          |                                                |          |     |
| gland   | hay     | Negative | cell movement of microglia                     | 3.45E-03 | 13  |
| Mammary | Alfalfa |          |                                                |          |     |
| gland   | hay     | Negative | airway hyperresponsiveness                     | 3.46E-03 | 27  |
| Mammary | Alfalfa |          |                                                |          |     |
| gland   | hay     | Negative | epilepsy                                       | 3.47E-03 | 62  |
| Mammary | Alfalfa |          |                                                |          |     |
| gland   | hay     | Negative | activation of Protein kinase                   | 3.60E-03 | 52  |
| Mammary | Alfalfa |          |                                                |          |     |
| gland   | hay     | Negative | morphology of blood cells                      | 3.61E-03 | 81  |
| Mammary | Alfalfa |          |                                                |          |     |
| gland   | hay     | Negative | development of blood cells                     | 3.61E-03 | 122 |
| Mammary | Alfalfa |          |                                                |          |     |
| gland   | hay     | Negative | transport of metal ion                         | 3.61E-03 | 64  |
| Mammary | Alfalfa |          |                                                |          |     |
| gland   | hay     | Negative | invasion of squamous cell carcinoma cell lines | 3.61E-03 | 16  |
| Mammary | Alfalfa |          |                                                |          |     |
| gland   | hay     | Negative | activation of oocytes                          | 3.63E-03 | 5   |
| Mammary | Alfalfa |          |                                                |          |     |
| gland   | hay     | Negative | formation of cytoskeleton                      | 3.63E-03 | 74  |
| Mammary | Alfalfa |          |                                                |          |     |
| gland   | hay     | Negative | proliferation of blood cells                   | 3.65E-03 | 154 |
| Mammary | Alfalfa |          |                                                |          |     |
| gland   | hay     | Negative | central nervous system tumor                   | 3.65E-03 | 166 |
| Mammary | Alfalfa |          |                                                |          |     |
| gland   | hay     | Negative | proliferation of lung cancer cell lines        | 3.66E-03 | 55  |
| Mammary | Alfalfa |          |                                                |          |     |
| gland   | hay     | Negative | uptake of monosaccharide                       | 3.66E-03 | 55  |
| Mammary | Alfalfa |          |                                                |          |     |
| gland   | hay     | Negative | cognitive impairment                           | 3.68E-03 | 66  |
| Mammary | Alfalfa | Negative | differentiation of epithelial tissue           | 3.70E-03 | 71  |

|         |         |          |                                           |          |     |
|---------|---------|----------|-------------------------------------------|----------|-----|
| gland   | hay     |          |                                           |          |     |
| Mammary | Alfalfa |          |                                           |          |     |
| gland   | hay     | Negative | invasion of lung cancer cell lines        | 3.73E-03 | 25  |
| Mammary | Alfalfa |          |                                           |          |     |
| gland   | hay     | Negative | migration of vascular smooth muscle cells | 3.73E-03 | 25  |
| Mammary | Alfalfa |          |                                           |          |     |
| gland   | hay     | Negative | cell viability of lung cancer cell lines  | 3.81E-03 | 27  |
| Mammary | Alfalfa |          |                                           |          |     |
| gland   | hay     | Negative | synthesis of reactive oxygen species      | 3.84E-03 | 92  |
| Mammary | Alfalfa |          |                                           |          |     |
| gland   | hay     | Negative | Neurodegeneration                         | 3.84E-03 | 62  |
| Mammary | Alfalfa |          |                                           |          |     |
| gland   | hay     | Negative | ubiquitination of protein                 | 3.88E-03 | 66  |
| Mammary | Alfalfa |          |                                           |          |     |
| gland   | hay     | Negative | growth of tumor                           | 3.88E-03 | 146 |
| Mammary | Alfalfa |          |                                           |          |     |
| gland   | hay     | Negative | migration of connective tissue cells      | 3.91E-03 | 39  |
| Mammary | Alfalfa |          |                                           |          |     |
| gland   | hay     | Negative | cell death of hepatoma cell lines         | 3.93E-03 | 37  |
| Mammary | Alfalfa |          |                                           |          |     |
| gland   | hay     | Negative | arthropathy                               | 4.00E-03 | 172 |
| Mammary | Alfalfa |          |                                           |          |     |
| gland   | hay     | Negative | accumulation of phagocytes                | 4.14E-03 | 32  |
| Mammary | Alfalfa |          |                                           |          |     |
| gland   | hay     | Negative | quantity of metal                         | 4.14E-03 | 95  |
| Mammary | Alfalfa |          |                                           |          |     |
| gland   | hay     | Negative | development of abdomen                    | 4.16E-03 | 109 |
| Mammary | Alfalfa |          |                                           |          |     |
| gland   | hay     | Negative | morphology of gonad                       | 4.21E-03 | 74  |
| Mammary | Alfalfa |          |                                           |          |     |
| gland   | hay     | Negative | Lymphocyte homeostasis                    | 4.24E-03 | 103 |
| Mammary | Alfalfa |          |                                           |          |     |
| gland   | hay     | Negative | apoptosis of embryonic cell lines         | 4.24E-03 | 39  |
| Mammary | Alfalfa |          |                                           |          |     |
| gland   | hay     | Negative | migration of mesenchymal cells            | 4.24E-03 | 12  |
| Mammary | Alfalfa |          |                                           |          |     |
| gland   | hay     | Negative | quantity of diacylglycerol                | 4.24E-03 | 16  |
| Mammary | Alfalfa |          |                                           |          |     |
| gland   | hay     | Negative | quantity of antigen presenting cells      | 4.24E-03 | 56  |
| Mammary | Alfalfa |          |                                           |          |     |
| gland   | hay     | Negative | quantity of myeloid cells                 | 4.26E-03 | 70  |
| Mammary | Alfalfa |          |                                           |          |     |
| gland   | hay     | Negative | morphology of genital organ               | 4.26E-03 | 82  |
| Mammary | Alfalfa | Negative | arthritis                                 | 4.33E-03 | 169 |

|         |         |          |                                         |          |     |
|---------|---------|----------|-----------------------------------------|----------|-----|
| gland   | hay     |          |                                         |          |     |
| Mammary | Alfalfa |          |                                         |          |     |
| gland   | hay     | Negative | development of body axis                | 4.33E-03 | 188 |
| Mammary | Alfalfa |          |                                         |          |     |
| gland   | hay     | Negative | necrosis of liver                       | 4.33E-03 | 49  |
| Mammary | Alfalfa |          |                                         |          |     |
| gland   | hay     | Negative | hemolysis                               | 4.33E-03 | 24  |
| Mammary | Alfalfa |          |                                         |          |     |
| gland   | hay     | Negative | development of epithelial tissue        | 4.34E-03 | 98  |
| Mammary | Alfalfa |          |                                         |          |     |
| gland   | hay     | Negative | metabolism of reactive oxygen species   | 4.45E-03 | 95  |
| Mammary | Alfalfa |          |                                         |          |     |
| gland   | hay     | Negative | size of embryo                          | 4.48E-03 | 70  |
| Mammary | Alfalfa |          |                                         |          |     |
| gland   | hay     | Negative | shape change of kidney cell lines       | 4.49E-03 | 17  |
| Mammary | Alfalfa |          |                                         |          |     |
| gland   | hay     | Negative | cell movement of macrophages            | 4.51E-03 | 54  |
| Mammary | Alfalfa |          |                                         |          |     |
| gland   | hay     | Negative | cancer of cells                         | 4.51E-03 | 52  |
| Mammary | Alfalfa |          |                                         |          |     |
| gland   | hay     | Negative | fibrosis of heart                       | 4.54E-03 | 39  |
| Mammary | Alfalfa |          |                                         |          |     |
| gland   | hay     | Negative | engulfment of leukocytes                | 4.59E-03 | 35  |
| Mammary | Alfalfa |          |                                         |          |     |
| gland   | hay     | Negative | migration of myeloid cells              | 4.59E-03 | 36  |
| Mammary | Alfalfa |          |                                         |          |     |
| gland   | hay     | Negative | hereditary motor and sensory neuropathy | 4.59E-03 | 22  |
| Mammary | Alfalfa |          |                                         |          |     |
| gland   | hay     | Negative | apoptosis of kidney cell lines          | 4.59E-03 | 49  |
| Mammary | Alfalfa |          |                                         |          |     |
| gland   | hay     | Negative | inflammation of organ                   | 4.61E-03 | 208 |
| Mammary | Alfalfa |          |                                         |          |     |
| gland   | hay     | Negative | metastasis of cells                     | 4.61E-03 | 51  |
| Mammary | Alfalfa |          |                                         |          |     |
| gland   | hay     | Negative | homo-oligomerization of protein         | 4.65E-03 | 30  |
| Mammary | Alfalfa |          |                                         |          |     |
| gland   | hay     | Negative | killing of tumor cell lines             | 4.66E-03 | 21  |
| Mammary | Alfalfa |          |                                         |          |     |
| gland   | hay     | Negative | apoptosis of antigen presenting cells   | 4.78E-03 | 31  |
| Mammary | Alfalfa |          |                                         |          |     |
| gland   | hay     | Negative | generation of mononuclear leukocytes    | 4.88E-03 | 32  |
| Mammary | Alfalfa |          |                                         |          |     |
| gland   | hay     | Negative | HIV infection                           | 4.90E-03 | 131 |
| Mammary | Alfalfa | Negative | invasion of ovarian cancer cell lines   | 4.92E-03 | 14  |

|         |         |          |                                                 |          |     |
|---------|---------|----------|-------------------------------------------------|----------|-----|
| gland   | hay     |          |                                                 |          |     |
| Mammary | Alfalfa |          |                                                 |          |     |
| gland   | hay     | Negative | colony formation                                | 4.97E-03 | 101 |
| Mammary | Alfalfa |          |                                                 |          |     |
| gland   | hay     | Negative | differentiation of blood cells                  | 4.97E-03 | 153 |
| Mammary | Alfalfa |          |                                                 |          |     |
| gland   | hay     | Negative | migration of vascular endothelial cells         | 4.97E-03 | 36  |
| Mammary | Alfalfa |          |                                                 |          |     |
| gland   | hay     | Negative | branching of cells                              | 4.97E-03 | 72  |
| Mammary | Alfalfa |          |                                                 |          |     |
| gland   | hay     | Negative | mental retardation                              | 5.05E-03 | 48  |
| Mammary | Alfalfa |          |                                                 |          |     |
| gland   | hay     | Negative | accumulation of leukocytes                      | 5.05E-03 | 54  |
| Mammary | Alfalfa |          |                                                 |          |     |
| gland   | hay     | Negative | cell death of leukemia cell lines               | 5.05E-03 | 63  |
| Mammary | Alfalfa |          |                                                 |          |     |
| gland   | hay     | Negative | apoptosis of carcinoma cell lines               | 5.05E-03 | 50  |
| Mammary | Alfalfa |          |                                                 |          |     |
| gland   | hay     | Negative | hypertrophy of tissue                           | 5.05E-03 | 52  |
| Mammary | Alfalfa |          |                                                 |          |     |
| gland   | hay     | Negative | degranulation of mast cells                     | 5.10E-03 | 30  |
| Mammary | Alfalfa |          |                                                 |          |     |
| gland   | hay     | Negative | uptake of 2-deoxyglucose                        | 5.13E-03 | 25  |
| Mammary | Alfalfa |          |                                                 |          |     |
| gland   | hay     | Negative | peripheral arterial disease                     | 5.18E-03 | 44  |
| Mammary | Alfalfa |          |                                                 |          |     |
| gland   | hay     | Negative | differentiation of connective tissue cells      | 5.20E-03 | 119 |
| Mammary | Alfalfa |          | abnormal morphology of retinal pigment          |          |     |
| gland   | hay     | Negative | epithelium                                      | 5.21E-03 | 12  |
| Mammary | Alfalfa |          |                                                 |          |     |
| gland   | hay     | Negative | quantity of trophoblast cells                   | 5.21E-03 | 12  |
| Mammary | Alfalfa |          |                                                 |          |     |
| gland   | hay     | Negative | size of animal                                  | 5.27E-03 | 38  |
| Mammary | Alfalfa |          |                                                 |          |     |
| gland   | hay     | Negative | cell death of hippocampal neurons               | 5.27E-03 | 21  |
| Mammary | Alfalfa |          |                                                 |          |     |
| gland   | hay     | Negative | infection of cells                              | 5.28E-03 | 145 |
| Mammary | Alfalfa |          |                                                 |          |     |
| gland   | hay     | Negative | chemoattraction of natural killer cells         | 5.28E-03 | 4   |
| Mammary | Alfalfa |          |                                                 |          |     |
| gland   | hay     | Negative | osmotic water permeability of cells             | 5.28E-03 | 4   |
| Mammary | Alfalfa |          |                                                 |          |     |
| gland   | hay     | Negative | polarization of B-lymphocyte derived cell lines | 5.28E-03 | 4   |
| Mammary | Alfalfa | Negative | syndromic mental retardation                    | 5.28E-03 | 34  |

|         |         |          |                                          |          |     |
|---------|---------|----------|------------------------------------------|----------|-----|
| gland   | hay     |          |                                          |          |     |
| Mammary | Alfalfa |          |                                          |          |     |
| gland   | hay     | Negative | generation of leukocytes                 | 5.28E-03 | 35  |
| Mammary | Alfalfa |          |                                          |          |     |
| gland   | hay     | Negative | migration of breast cancer cell lines    | 5.28E-03 | 50  |
| Mammary | Alfalfa |          |                                          |          |     |
| gland   | hay     | Negative | differentiation of muscle                | 5.28E-03 | 60  |
| Mammary | Alfalfa |          |                                          |          |     |
| gland   | hay     | Negative | cell death of carcinoma cell lines       | 5.28E-03 | 57  |
| Mammary | Alfalfa |          |                                          |          |     |
| gland   | hay     | Negative | apoptosis of fibroblasts                 | 5.31E-03 | 45  |
| Mammary | Alfalfa |          |                                          |          |     |
| gland   | hay     | Negative | cell death of liver cells                | 5.37E-03 | 41  |
| Mammary | Alfalfa |          |                                          |          |     |
| gland   | hay     | Negative | oral cavity carcinoma                    | 5.37E-03 | 41  |
| Mammary | Alfalfa |          |                                          |          |     |
| gland   | hay     | Negative | fibrogenesis                             | 5.42E-03 | 79  |
| Mammary | Alfalfa |          |                                          |          |     |
| gland   | hay     | Negative | chronic inflammatory disorder            | 5.56E-03 | 174 |
| Mammary | Alfalfa |          |                                          |          |     |
| gland   | hay     | Negative | cell death of kidney cell lines          | 5.60E-03 | 60  |
| Mammary | Alfalfa |          |                                          |          |     |
| gland   | hay     | Negative | apoptosis of microglia                   | 5.60E-03 | 8   |
| Mammary | Alfalfa |          |                                          |          |     |
| gland   | hay     | Negative | adhesion of mononuclear leukocytes       | 5.69E-03 | 32  |
| Mammary | Alfalfa |          |                                          |          |     |
| gland   | hay     | Negative | cell death of endothelial cells          | 5.70E-03 | 42  |
| Mammary | Alfalfa |          |                                          |          |     |
| gland   | hay     | Negative | serous neoplasm                          | 5.77E-03 | 113 |
| Mammary | Alfalfa |          |                                          |          |     |
| gland   | hay     | Negative | exencephaly                              | 5.77E-03 | 28  |
| Mammary | Alfalfa |          |                                          |          |     |
| gland   | hay     | Negative | targeting of protein                     | 5.98E-03 | 29  |
| Mammary | Alfalfa |          |                                          |          |     |
| gland   | hay     | Negative | migration of tumor cells                 | 6.00E-03 | 46  |
| Mammary | Alfalfa |          |                                          |          |     |
| gland   | hay     | Negative | abnormal morphology of joint             | 6.00E-03 | 17  |
| Mammary | Alfalfa |          |                                          |          |     |
| gland   | hay     | Negative | outgrowth of plasma membrane projections | 6.00E-03 | 78  |
| Mammary | Alfalfa |          |                                          |          |     |
| gland   | hay     | Negative | extension of cellular protrusions        | 6.00E-03 | 43  |
| Mammary | Alfalfa |          |                                          |          |     |
| gland   | hay     | Negative | attachment of cells                      | 6.08E-03 | 30  |
| Mammary | Alfalfa | Negative | transport of L-glutamic acid             | 6.10E-03 | 10  |



|         |         |          |                                     |          |      |
|---------|---------|----------|-------------------------------------|----------|------|
| gland   | hay     |          |                                     |          |      |
| Mammary | Alfalfa |          |                                     |          |      |
| gland   | hay     | Negative | generation of lymphocytes           | 6.17E-03 | 31   |
| Mammary | Alfalfa |          |                                     |          |      |
| gland   | hay     | Negative | cell death of neuroglia             | 6.17E-03 | 27   |
| Mammary | Alfalfa |          |                                     |          |      |
| gland   | hay     | Negative | proliferation of myeloid cells      | 6.17E-03 | 27   |
| Mammary | Alfalfa |          |                                     |          |      |
| gland   | hay     | Negative | quantity of T lymphocytes           | 6.22E-03 | 100  |
| Mammary | Alfalfa |          |                                     |          |      |
| gland   | hay     | Negative | septic shock                        | 6.24E-03 | 33   |
| Mammary | Alfalfa |          |                                     |          |      |
| gland   | hay     | Negative | adhesion of tumor cell lines        | 6.32E-03 | 57   |
| Mammary | Alfalfa |          |                                     |          |      |
| gland   | hay     | Negative | adenocarcinoma                      | 6.34E-03 | 1041 |
| Mammary | Alfalfa |          |                                     |          |      |
| gland   | hay     | Negative | quantity of granulocytes            | 6.43E-03 | 62   |
| Mammary | Alfalfa |          |                                     |          |      |
| gland   | hay     | Negative | development of macrophages          | 6.43E-03 | 12   |
| Mammary | Alfalfa |          |                                     |          |      |
| gland   | hay     | Negative | morphology of filaments             | 6.43E-03 | 11   |
| Mammary | Alfalfa |          |                                     |          |      |
| gland   | hay     | Negative | cell death of granulocytes          | 6.47E-03 | 22   |
| Mammary | Alfalfa |          |                                     |          |      |
| gland   | hay     | Negative | development of myeloid cells        | 6.47E-03 | 22   |
| Mammary | Alfalfa |          |                                     |          |      |
| gland   | hay     | Negative | formation of muscle                 | 6.57E-03 | 76   |
| Mammary | Alfalfa |          |                                     |          |      |
| gland   | hay     | Negative | differentiation of embryonic tissue | 6.57E-03 | 51   |
| Mammary | Alfalfa |          |                                     |          |      |
| gland   | hay     | Negative | quantity of cytokine                | 6.57E-03 | 51   |
| Mammary | Alfalfa |          |                                     |          |      |
| gland   | hay     | Negative | morphology of cardiovascular tissue | 6.69E-03 | 21   |
| Mammary | Alfalfa |          |                                     |          |      |
| gland   | hay     | Negative | metabolism of phosphatidic acid     | 6.69E-03 | 36   |
| Mammary | Alfalfa |          |                                     |          |      |
| gland   | hay     | Negative | formation of blood cells            | 6.69E-03 | 41   |
| Mammary | Alfalfa |          |                                     |          |      |
| gland   | hay     | Negative | quantity of B lymphocytes           | 6.69E-03 | 67   |
| Mammary | Alfalfa |          |                                     |          |      |
| gland   | hay     | Negative | formation of leukocytes             | 6.77E-03 | 34   |
| Mammary | Alfalfa |          |                                     |          |      |
| gland   | hay     | Negative | branching of neurites               | 6.77E-03 | 55   |
| Mammary | Alfalfa | Negative | demyelination                       | 6.77E-03 | 27   |

|         |         |          |                                               |          |     |  |
|---------|---------|----------|-----------------------------------------------|----------|-----|--|
| gland   | hay     |          |                                               |          |     |  |
| Mammary | Alfalfa |          |                                               |          |     |  |
| gland   | hay     | Negative | development of hematopoietic progenitor cells | 6.80E-03 | 40  |  |
| Mammary | Alfalfa |          |                                               |          |     |  |
| gland   | hay     | Negative | sprouting                                     | 6.83E-03 | 74  |  |
| Mammary | Alfalfa |          |                                               |          |     |  |
| gland   | hay     | Negative | removal of cells                              | 6.92E-03 | 23  |  |
| Mammary | Alfalfa |          |                                               |          |     |  |
| gland   | hay     | Negative | organic aciduria                              | 6.92E-03 | 14  |  |
| Mammary | Alfalfa |          |                                               |          |     |  |
| gland   | hay     | Negative | phosphorylation of carbohydrate               | 6.92E-03 | 14  |  |
| Mammary | Alfalfa |          |                                               |          |     |  |
| gland   | hay     | Negative | cell viability of cervical cancer cell lines  | 6.92E-03 | 45  |  |
| Mammary | Alfalfa |          |                                               |          |     |  |
| gland   | hay     | Negative | proliferation of immune cells                 | 6.93E-03 | 143 |  |
| Mammary | Alfalfa |          |                                               |          |     |  |
| gland   | hay     | Negative | anemia                                        | 6.99E-03 | 67  |  |
| Mammary | Alfalfa |          |                                               |          |     |  |
| gland   | hay     | Negative | movement of vascular endothelial cells        | 7.00E-03 | 38  |  |
| Mammary | Alfalfa |          |                                               |          |     |  |
| gland   | hay     | Negative | fertility                                     | 7.07E-03 | 70  |  |
| Mammary | Alfalfa |          |                                               |          |     |  |
| gland   | hay     | Negative | export of molecule                            | 7.07E-03 | 58  |  |
| Mammary | Alfalfa |          |                                               |          |     |  |
| gland   | hay     | Negative | S phase                                       | 7.07E-03 | 52  |  |
| Mammary | Alfalfa |          |                                               |          |     |  |
| gland   | hay     | Negative | outgrowth of neurites                         | 7.09E-03 | 77  |  |
| Mammary | Alfalfa |          |                                               |          |     |  |
| gland   | hay     | Negative | engulfment of blood cells                     | 7.16E-03 | 36  |  |
| Mammary | Alfalfa |          |                                               |          |     |  |
| gland   | hay     | Negative | morphology of uterus                          | 7.19E-03 | 22  |  |
| Mammary | Alfalfa |          |                                               |          |     |  |
| gland   | hay     | Negative | migration of fibroblasts                      | 7.24E-03 | 31  |  |
| Mammary | Alfalfa |          |                                               |          |     |  |
| gland   | hay     | Negative | abnormal morphology of gonad                  | 7.46E-03 | 70  |  |
| Mammary | Alfalfa |          |                                               |          |     |  |
| gland   | hay     | Negative | ion homeostasis of cells                      | 7.51E-03 | 103 |  |
| Mammary | Alfalfa |          |                                               |          |     |  |
| gland   | hay     | Negative | abnormal morphology of neurosensory retina    | 7.51E-03 | 21  |  |
| Mammary | Alfalfa |          |                                               |          |     |  |
| gland   | hay     | Negative | shape change of neurites                      | 7.76E-03 | 56  |  |
| Mammary | Alfalfa |          |                                               |          |     |  |
| gland   | hay     | Negative | infection by HIV-1                            | 7.77E-03 | 112 |  |
| Mammary | Alfalfa | Negative | permeability of cells                         | 7.77E-03 | 23  |  |

|         |         |          |                                             |          |     |
|---------|---------|----------|---------------------------------------------|----------|-----|
| gland   | hay     |          |                                             |          |     |
| Mammary | Alfalfa |          |                                             |          |     |
| gland   | hay     | Negative | morphology of endothelial tissue            | 7.77E-03 | 20  |
| Mammary | Alfalfa |          |                                             |          |     |
| gland   | hay     | Negative | activation of neuroglia                     | 7.81E-03 | 29  |
| Mammary | Alfalfa |          |                                             |          |     |
| gland   | hay     | Negative | internalization of cells                    | 7.88E-03 | 35  |
| Mammary | Alfalfa |          |                                             |          |     |
| gland   | hay     | Negative | synthesis of phosphatidic acid              | 7.88E-03 | 30  |
| Mammary | Alfalfa |          |                                             |          |     |
| gland   | hay     | Negative | necrosis of glioma                          | 7.88E-03 | 12  |
| Mammary | Alfalfa |          |                                             |          |     |
| gland   | hay     | Negative | apoptosis of seminiferous tubule cells      | 7.88E-03 | 5   |
| Mammary | Alfalfa |          |                                             |          |     |
| gland   | hay     | Negative | development of connective tissue cells      | 7.88E-03 | 45  |
| Mammary | Alfalfa |          |                                             |          |     |
| gland   | hay     | Negative | abnormal morphology of PNS glial cells      | 7.88E-03 | 8   |
| Mammary | Alfalfa |          |                                             |          |     |
| gland   | hay     | Negative | cell death of blood cells                   | 7.88E-03 | 126 |
| Mammary | Alfalfa |          |                                             |          |     |
| gland   | hay     | Negative | migration of granulocytes                   | 7.88E-03 | 31  |
| Mammary | Alfalfa |          |                                             |          |     |
| gland   | hay     | Negative | degranulation of phagocytes                 | 7.88E-03 | 33  |
| Mammary | Alfalfa |          |                                             |          |     |
| gland   | hay     | Negative | aciduria                                    | 7.88E-03 | 17  |
| Mammary | Alfalfa |          |                                             |          |     |
| gland   | hay     | Negative | differentiation of smooth muscle            | 7.88E-03 | 17  |
| Mammary | Alfalfa |          |                                             |          |     |
| gland   | hay     | Negative | thoracic neoplasm                           | 7.88E-03 | 199 |
| Mammary | Alfalfa |          |                                             |          |     |
| gland   | hay     | Negative | apoptosis of epithelial cells               | 8.05E-03 | 56  |
| Mammary | Alfalfa |          |                                             |          |     |
| gland   | hay     | Negative | apoptosis of tumor cells                    | 8.05E-03 | 56  |
| Mammary | Alfalfa |          |                                             |          |     |
| gland   | hay     | Negative | apoptosis of testicular cells               | 8.05E-03 | 7   |
| Mammary | Alfalfa |          |                                             |          |     |
| gland   | hay     | Negative | retinal degeneration                        | 8.24E-03 | 51  |
| Mammary | Alfalfa |          |                                             |          |     |
| gland   | hay     | Negative | activation of cells                         | 8.24E-03 | 173 |
| Mammary | Alfalfa |          |                                             |          |     |
| gland   | hay     | Negative | formation of hematopoietic progenitor cells | 8.33E-03 | 28  |
| Mammary | Alfalfa |          |                                             |          |     |
| gland   | hay     | Negative | Shock Response                              | 8.33E-03 | 36  |
| Mammary | Alfalfa | Negative | apoptosis of granulocytes                   | 8.40E-03 | 21  |

|         |         |          |                                         |          |      |
|---------|---------|----------|-----------------------------------------|----------|------|
| gland   | hay     |          |                                         |          |      |
| Mammary | Alfalfa |          |                                         |          |      |
| gland   | hay     | Negative | transport of divalent cations           | 8.43E-03 | 35   |
| Mammary | Alfalfa |          |                                         |          |      |
| gland   | hay     | Negative | abnormal morphology of nervous system   | 8.53E-03 | 131  |
| Mammary | Alfalfa |          |                                         |          |      |
| gland   | hay     | Negative | branching of neurons                    | 8.54E-03 | 56   |
| Mammary | Alfalfa |          |                                         |          |      |
| gland   | hay     | Negative | hereditary polyneuropathy               | 8.56E-03 | 23   |
| Mammary | Alfalfa |          |                                         |          |      |
| gland   | hay     | Negative | growth of skin                          | 8.62E-03 | 44   |
| Mammary | Alfalfa |          |                                         |          |      |
| gland   | hay     | Negative | breast or colorectal cancer             | 8.67E-03 | 802  |
| Mammary | Alfalfa |          |                                         |          |      |
| gland   | hay     | Negative | shape change of plasma membrane         | 8.72E-03 | 15   |
| Mammary | Alfalfa |          |                                         |          |      |
| gland   | hay     | Negative | orientation of cells                    | 8.87E-03 | 37   |
| Mammary | Alfalfa |          |                                         |          |      |
| gland   | hay     | Negative | degeneration of cells                   | 8.87E-03 | 66   |
| Mammary | Alfalfa |          |                                         |          |      |
| gland   | hay     | Negative | quantity of Ca <sup>2+</sup>            | 8.87E-03 | 77   |
| Mammary | Alfalfa |          |                                         |          |      |
| gland   | hay     | Negative | formation of osteoclasts                | 8.99E-03 | 27   |
| Mammary | Alfalfa |          |                                         |          |      |
| gland   | hay     | Negative | permeability of blood vessel            | 9.04E-03 | 22   |
| Mammary | Alfalfa |          |                                         |          |      |
| gland   | hay     | Negative | growth of plasma membrane projections   | 9.14E-03 | 87   |
| Mammary | Alfalfa |          |                                         |          |      |
| gland   | hay     | Negative | arrest in growth of organism            | 9.14E-03 | 35   |
| Mammary | Alfalfa |          |                                         |          |      |
| gland   | hay     | Negative | development of antigen presenting cells | 9.15E-03 | 17   |
| Mammary | Alfalfa |          |                                         |          |      |
| gland   | hay     | Negative | melanoma                                | 9.16E-03 | 1059 |
| Mammary | Alfalfa |          |                                         |          |      |
| gland   | hay     | Negative | dendritic growth/branching              | 9.20E-03 | 44   |
| Mammary | Alfalfa |          |                                         |          |      |
| gland   | hay     | Negative | formation of lamellipodia               | 9.20E-03 | 34   |
| Mammary | Alfalfa |          |                                         |          |      |
| gland   | hay     | Negative | transport of amino acids                | 9.23E-03 | 29   |
| Mammary | Alfalfa |          |                                         |          |      |
| gland   | hay     | Negative | abnormal morphology of genital organ    | 9.24E-03 | 77   |
| Mammary | Alfalfa |          |                                         |          |      |
| gland   | hay     | Negative | female genital tract serous cancer      | 9.35E-03 | 73   |
| Mammary | Alfalfa | Negative | inflammation of artery                  | 9.36E-03 | 9    |

|         |         |          |                                             |          |      |
|---------|---------|----------|---------------------------------------------|----------|------|
| gland   | hay     |          |                                             |          |      |
| Mammary | Alfalfa |          |                                             |          |      |
| gland   | hay     | Negative | congenital anomaly of skin                  | 9.55E-03 | 37   |
| Mammary | Alfalfa |          | abnormal morphology of vascular endothelial |          |      |
| gland   | hay     | Negative | cells                                       | 9.60E-03 | 12   |
| Mammary | Alfalfa |          |                                             |          |      |
| gland   | hay     | Negative | allodynia                                   | 9.76E-03 | 14   |
| Mammary | Alfalfa |          |                                             |          |      |
| gland   | hay     | Negative | phagocytosis of neutrophils                 | 9.76E-03 | 14   |
| Mammary | Alfalfa |          |                                             |          |      |
| gland   | hay     | Negative | benign pelvic disease                       | 9.76E-03 | 75   |
| Mammary | Alfalfa |          |                                             |          |      |
| gland   | hay     | Negative | formation of filaments                      | 9.76E-03 | 75   |
| Mammary | Alfalfa |          |                                             |          |      |
| gland   | hay     | Negative | formation of eye                            | 9.86E-03 | 82   |
| Mammary | Alfalfa |          |                                             |          |      |
| gland   | hay     | Negative | infection by RNA virus                      | 9.92E-03 | 154  |
| Mammary | Alfalfa |          |                                             |          |      |
| gland   | hay     | Negative | cell movement of mononuclear leukocytes     | 9.98E-03 | 86   |
| Mammary | Alfalfa |          |                                             |          |      |
| gland   | hay     | Negative | apoptosis of cerebral cortex cells          | 9.98E-03 | 24   |
| Mammary | Alfalfa |          |                                             |          |      |
| gland   | hay     | Negative | quantity of trophoblast giant cells         | 9.98E-03 | 11   |
| Mammary | Alfalfa |          |                                             |          |      |
| gland   | hay     | Negative | apoptosis of glioma cells                   | 9.98E-03 | 10   |
| Mammary | Rice    |          |                                             |          |      |
| gland   | straw   | Positive | proliferation of cells                      | 8.08E-19 | 851  |
| Mammary | Rice    |          |                                             |          |      |
| gland   | straw   | Positive | cell death                                  | 2.71E-18 | 777  |
| Mammary | Rice    |          |                                             |          |      |
| gland   | straw   | Positive | organization of cytoplasm                   | 1.88E-17 | 403  |
| Mammary | Rice    |          |                                             |          |      |
| gland   | straw   | Positive | necrosis                                    | 5.70E-17 | 616  |
| Mammary | Rice    |          |                                             |          |      |
| gland   | straw   | Positive | organismal death                            | 5.70E-17 | 580  |
| Mammary | Rice    |          |                                             |          |      |
| gland   | straw   | Positive | cancer                                      | 9.22E-17 | 2151 |
| Mammary | Rice    |          |                                             |          |      |
| gland   | straw   | Positive | morbidity or mortality                      | 9.22E-17 | 585  |
| Mammary | Rice    |          |                                             |          |      |
| gland   | straw   | Positive | malignant solid tumor                       | 1.15E-16 | 2127 |
| Mammary | Rice    |          |                                             |          |      |
| gland   | straw   | Positive | morphology of cells                         | 1.68E-15 | 480  |
| Mammary | Rice    | Positive | apoptosis                                   | 3.53E-15 | 620  |

|         |       |          |                                |          |      |  |
|---------|-------|----------|--------------------------------|----------|------|--|
| gland   | straw |          |                                |          |      |  |
| Mammary | Rice  |          |                                |          |      |  |
| gland   | straw | Positive | organization of cytoskeleton   | 4.34E-15 | 362  |  |
| Mammary | Rice  |          |                                |          |      |  |
| gland   | straw | Positive | epithelial cancer              | 6.26E-15 | 1776 |  |
| Mammary | Rice  |          |                                |          |      |  |
| gland   | straw | Positive | neoplasia of epithelial tissue | 8.97E-15 | 1790 |  |
| Mammary | Rice  |          |                                |          |      |  |
| gland   | straw | Positive | cellular homeostasis           | 1.07E-14 | 387  |  |
| Mammary | Rice  |          |                                |          |      |  |
| gland   | straw | Positive | tumorigenesis of tissue        | 3.11E-14 | 1813 |  |
| Mammary | Rice  |          |                                |          |      |  |
| gland   | straw | Positive | quantity of cells              | 3.03E-13 | 432  |  |
| Mammary | Rice  |          |                                |          |      |  |
| gland   | straw | Positive | cell movement                  | 3.79E-13 | 505  |  |
| Mammary | Rice  |          |                                |          |      |  |
| gland   | straw | Positive | Movement Disorders             | 1.17E-12 | 279  |  |
| Mammary | Rice  |          |                                |          |      |  |
| gland   | straw | Positive | migration of cells             | 2.46E-12 | 455  |  |
| Mammary | Rice  |          |                                |          |      |  |
| gland   | straw | Positive | dyskinesia                     | 3.60E-12 | 177  |  |
| Mammary | Rice  |          |                                |          |      |  |
| gland   | straw | Positive | neurological signs             | 3.61E-12 | 185  |  |
| Mammary | Rice  |          |                                |          |      |  |
| gland   | straw | Positive | cell survival                  | 3.74E-12 | 348  |  |
| Mammary | Rice  |          |                                |          |      |  |
| gland   | straw | Positive | disorder of basal ganglia      | 5.33E-12 | 211  |  |
| Mammary | Rice  |          |                                |          |      |  |
| gland   | straw | Positive | cell viability                 | 1.25E-11 | 326  |  |
| Mammary | Rice  |          |                                |          |      |  |
| gland   | straw | Positive | abdominal neoplasm             | 2.20E-11 | 1755 |  |
| Mammary | Rice  |          |                                |          |      |  |
| gland   | straw | Positive | microtubule dynamics           | 3.86E-11 | 299  |  |
| Mammary | Rice  |          |                                |          |      |  |
| gland   | straw | Positive | differentiation of cells       | 4.53E-11 | 518  |  |
| Mammary | Rice  |          |                                |          |      |  |
| gland   | straw | Positive | Huntington's Disease           | 1.08E-10 | 162  |  |
| Mammary | Rice  |          |                                |          |      |  |
| gland   | straw | Positive | neuromuscular disease          | 1.91E-10 | 231  |  |
| Mammary | Rice  |          |                                |          |      |  |
| gland   | straw | Positive | cell death of tumor cell lines | 2.13E-10 | 367  |  |
| Mammary | Rice  |          |                                |          |      |  |
| gland   | straw | Positive | abdominal cancer               | 2.15E-10 | 1729 |  |
| Mammary | Rice  | Positive | apoptosis of tumor cell lines  | 2.34E-10 | 301  |  |

|         |       |          |                                       |          |      |  |
|---------|-------|----------|---------------------------------------|----------|------|--|
| gland   | straw |          |                                       |          |      |  |
| Mammary | Rice  |          |                                       |          |      |  |
| gland   | straw | Positive | quantity of leukocytes                | 6.12E-10 | 236  |  |
| Mammary | Rice  |          |                                       |          |      |  |
| gland   | straw | Positive | quantity of blood cells               | 6.37E-10 | 260  |  |
| Mammary | Rice  |          |                                       |          |      |  |
| gland   | straw | Positive | transport of molecule                 | 9.87E-10 | 381  |  |
| Mammary | Rice  |          |                                       |          |      |  |
| gland   | straw | Positive | transcription                         | 1.23E-09 | 458  |  |
| Mammary | Rice  |          |                                       |          |      |  |
| gland   | straw | Positive | expression of RNA                     | 1.38E-09 | 488  |  |
| Mammary | Rice  |          |                                       |          |      |  |
| gland   | straw | Positive | angiogenesis                          | 2.92E-09 | 231  |  |
| Mammary | Rice  |          |                                       |          |      |  |
| gland   | straw | Positive | formation of cellular protrusions     | 5.21E-09 | 229  |  |
| Mammary | Rice  |          |                                       |          |      |  |
| gland   | straw | Positive | cell movement of tumor cell lines     | 2.53E-08 | 215  |  |
| Mammary | Rice  |          |                                       |          |      |  |
| gland   | straw | Positive | transcription of RNA                  | 3.27E-08 | 422  |  |
| Mammary | Rice  |          |                                       |          |      |  |
| gland   | straw | Positive | abnormal morphology of cells          | 4.35E-08 | 301  |  |
| Mammary | Rice  |          |                                       |          |      |  |
| gland   | straw | Positive | advanced malignant tumor              | 6.23E-08 | 212  |  |
| Mammary | Rice  |          |                                       |          |      |  |
| gland   | straw | Positive | vasculogenesis                        | 6.83E-08 | 188  |  |
| Mammary | Rice  |          |                                       |          |      |  |
| gland   | straw | Positive | cell death of connective tissue cells | 1.45E-07 | 157  |  |
| Mammary | Rice  |          |                                       |          |      |  |
| gland   | straw | Positive | invasion of cells                     | 1.79E-07 | 215  |  |
| Mammary | Rice  |          |                                       |          |      |  |
| gland   | straw | Positive | digestive system cancer               | 2.33E-07 | 1488 |  |
| Mammary | Rice  |          |                                       |          |      |  |
| gland   | straw | Positive | migration of tumor cell lines         | 2.44E-07 | 179  |  |
| Mammary | Rice  |          |                                       |          |      |  |
| gland   | straw | Positive | development of cytoplasm              | 2.89E-07 | 124  |  |
| Mammary | Rice  |          |                                       |          |      |  |
| gland   | straw | Positive | function of leukocytes                | 2.92E-07 | 141  |  |
| Mammary | Rice  |          |                                       |          |      |  |
| gland   | straw | Positive | cell movement of blood cells          | 3.00E-07 | 215  |  |
| Mammary | Rice  |          |                                       |          |      |  |
| gland   | straw | Positive | morphology of cardiovascular system   | 3.63E-07 | 159  |  |
| Mammary | Rice  |          |                                       |          |      |  |
| gland   | straw | Positive | organization of organelle             | 3.73E-07 | 141  |  |
| Mammary | Rice  | Positive | migration of blood cells              | 3.76E-07 | 214  |  |

|         |       |          |                                          |          |      |
|---------|-------|----------|------------------------------------------|----------|------|
| gland   | straw |          |                                          |          |      |
| Mammary | Rice  |          |                                          |          |      |
| gland   | straw | Positive | metabolism of carbohydrate               | 4.12E-07 | 159  |
| Mammary | Rice  |          |                                          |          |      |
| gland   | straw | Positive | proliferation of fibroblasts             | 4.60E-07 | 98   |
| Mammary | Rice  |          |                                          |          |      |
| gland   | straw | Positive | leukocyte migration                      | 5.08E-07 | 213  |
| Mammary | Rice  |          |                                          |          |      |
| gland   | straw | Positive | Organ Degeneration                       | 5.11E-07 | 130  |
| Mammary | Rice  |          |                                          |          |      |
| gland   | straw | Positive | digestive organ tumor                    | 5.43E-07 | 1497 |
| Mammary | Rice  |          |                                          |          |      |
| gland   | straw | Positive | formation of cytoskeleton                | 5.69E-07 | 103  |
| Mammary | Rice  |          |                                          |          |      |
| gland   | straw | Positive | growth of connective tissue              | 7.11E-07 | 163  |
| Mammary | Rice  |          |                                          |          |      |
| gland   | straw | Positive | cell viability of tumor cell lines       | 8.08E-07 | 192  |
| Mammary | Rice  |          |                                          |          |      |
| gland   | straw | Positive | synthesis of lipid                       | 8.25E-07 | 178  |
| Mammary | Rice  |          |                                          |          |      |
| gland   | straw | Positive | benign neoplasia                         | 9.16E-07 | 223  |
| Mammary | Rice  |          |                                          |          |      |
| gland   | straw | Positive | invasion of tumor cell lines             | 9.46E-07 | 167  |
| Mammary | Rice  |          |                                          |          |      |
| gland   | straw | Positive | cell movement of leukocytes              | 9.55E-07 | 189  |
| Mammary | Rice  |          |                                          |          |      |
| gland   | straw | Positive | proliferation of connective tissue cells | 9.66E-07 | 151  |
| Mammary | Rice  |          |                                          |          |      |
| gland   | straw | Positive | development of leukocytes                | 9.90E-07 | 150  |
| Mammary | Rice  |          |                                          |          |      |
| gland   | straw | Positive | proliferation of tumor cell lines        | 1.42E-06 | 349  |
| Mammary | Rice  |          |                                          |          |      |
| gland   | straw | Positive | degeneration of cells                    | 1.65E-06 | 94   |
| Mammary | Rice  |          |                                          |          |      |
| gland   | straw | Positive | transcription of DNA                     | 1.66E-06 | 346  |
| Mammary | Rice  |          |                                          |          |      |
| gland   | straw | Positive | morphology of body cavity                | 1.74E-06 | 277  |
| Mammary | Rice  |          |                                          |          |      |
| gland   | straw | Positive | concentration of lipid                   | 1.82E-06 | 197  |
| Mammary | Rice  |          |                                          |          |      |
| gland   | straw | Positive | ubiquitination                           | 1.99E-06 | 92   |
| Mammary | Rice  |          |                                          |          |      |
| gland   | straw | Positive | abnormal morphology of thoracic cavity   | 2.20E-06 | 148  |
| Mammary | Rice  | Positive | protein kinase cascade                   | 2.38E-06 | 111  |



|         |       |          |                                              |          |      |  |
|---------|-------|----------|----------------------------------------------|----------|------|--|
| gland   | straw |          |                                              |          |      |  |
| Mammary | Rice  |          |                                              |          |      |  |
| gland   | straw | Positive | abnormal morphology of body cavity           | 2.76E-06 | 265  |  |
| Mammary | Rice  |          |                                              |          |      |  |
| gland   | straw | Positive | ubiquitination of protein                    | 3.50E-06 | 90   |  |
| Mammary | Rice  |          |                                              |          |      |  |
| gland   | straw | Positive | function of blood cells                      | 3.71E-06 | 147  |  |
| Mammary | Rice  |          |                                              |          |      |  |
| gland   | straw | Positive | development of body trunk                    | 3.76E-06 | 259  |  |
| Mammary | Rice  |          |                                              |          |      |  |
| gland   | straw | Positive | proliferation of blood cells                 | 3.76E-06 | 202  |  |
| Mammary | Rice  |          |                                              |          |      |  |
| gland   | straw | Positive | cell transformation                          | 3.81E-06 | 119  |  |
| Mammary | Rice  |          |                                              |          |      |  |
| gland   | straw | Positive | quantity of lymphocytes                      | 4.01E-06 | 173  |  |
| Mammary | Rice  |          |                                              |          |      |  |
| gland   | straw | Positive | proliferation of immune cells                | 4.23E-06 | 191  |  |
| Mammary | Rice  |          |                                              |          |      |  |
| gland   | straw | Positive | development of blood cells                   | 4.32E-06 | 161  |  |
| Mammary | Rice  |          |                                              |          |      |  |
| gland   | straw | Positive | binding of DNA                               | 4.70E-06 | 132  |  |
| Mammary | Rice  |          |                                              |          |      |  |
| gland   | straw | Positive | development of epithelial tissue             | 4.82E-06 | 131  |  |
| Mammary | Rice  |          |                                              |          |      |  |
| gland   | straw | Positive | degeneration of nervous system               | 5.23E-06 | 79   |  |
| Mammary | Rice  |          |                                              |          |      |  |
| gland   | straw | Positive | quantity of mononuclear leukocytes           | 6.23E-06 | 178  |  |
| Mammary | Rice  |          |                                              |          |      |  |
| gland   | straw | Positive | cell movement of endothelial cells           | 6.23E-06 | 94   |  |
| Mammary | Rice  |          |                                              |          |      |  |
| gland   | straw | Positive | metastasis                                   | 6.89E-06 | 183  |  |
| Mammary | Rice  |          |                                              |          |      |  |
| gland   | straw | Positive | adenocarcinoma                               | 7.32E-06 | 1299 |  |
| Mammary | Rice  |          |                                              |          |      |  |
| gland   | straw | Positive | homing of cells                              | 8.16E-06 | 139  |  |
| Mammary | Rice  |          |                                              |          |      |  |
| gland   | straw | Positive | function of macrophages                      | 8.62E-06 | 53   |  |
| Mammary | Rice  |          |                                              |          |      |  |
| gland   | straw | Positive | abnormal morphology of cardiovascular system | 8.74E-06 | 141  |  |
| Mammary | Rice  |          |                                              |          |      |  |
| gland   | straw | Positive | abnormal morphology of epithelial tissue     | 8.93E-06 | 108  |  |
| Mammary | Rice  |          |                                              |          |      |  |
| gland   | straw | Positive | growth of epithelial tissue                  | 1.03E-05 | 165  |  |
| Mammary | Rice  | Positive | apoptosis of connective tissue cells         | 1.03E-05 | 80   |  |

|         |       |          |                                              |          |     |  |
|---------|-------|----------|----------------------------------------------|----------|-----|--|
| gland   | straw |          |                                              |          |     |  |
| Mammary | Rice  |          |                                              |          |     |  |
| gland   | straw | Positive | growth of lesion                             | 1.03E-05 | 190 |  |
| Mammary | Rice  |          |                                              |          |     |  |
| gland   | straw | Positive | homing                                       | 1.03E-05 | 142 |  |
| Mammary | Rice  |          |                                              |          |     |  |
| gland   | straw | Positive | advanced stage solid tumor                   | 1.13E-05 | 129 |  |
| Mammary | Rice  |          |                                              |          |     |  |
| gland   | straw | Positive | formation of eye                             | 1.13E-05 | 112 |  |
| Mammary | Rice  |          |                                              |          |     |  |
| gland   | straw | Positive | morphology of head                           | 1.24E-05 | 206 |  |
| Mammary | Rice  |          |                                              |          |     |  |
| gland   | straw | Positive | binding of protein binding site              | 1.25E-05 | 78  |  |
| Mammary | Rice  |          |                                              |          |     |  |
| gland   | straw | Positive | development of mononuclear leukocytes        | 1.27E-05 | 138 |  |
| Mammary | Rice  |          |                                              |          |     |  |
| gland   | straw | Positive | development of lymphocytes                   | 1.31E-05 | 137 |  |
| Mammary | Rice  |          |                                              |          |     |  |
| gland   | straw | Positive | growth of tumor                              | 1.35E-05 | 189 |  |
| Mammary | Rice  |          |                                              |          |     |  |
| gland   | straw | Positive | chemotaxis                                   | 1.40E-05 | 135 |  |
| Mammary | Rice  |          |                                              |          |     |  |
| gland   | straw | Positive | chemotaxis of cells                          | 1.51E-05 | 131 |  |
| Mammary | Rice  |          |                                              |          |     |  |
| gland   | straw | Positive | Viral Infection                              | 1.54E-05 | 354 |  |
| Mammary | Rice  |          |                                              |          |     |  |
| gland   | straw | Positive | peripheral arterial disease                  | 1.55E-05 | 60  |  |
| Mammary | Rice  |          |                                              |          |     |  |
| gland   | straw | Positive | infection by Retroviridae                    | 1.78E-05 | 172 |  |
| Mammary | Rice  |          |                                              |          |     |  |
| gland   | straw | Positive | cell death of fibroblasts                    | 1.78E-05 | 72  |  |
| Mammary | Rice  |          |                                              |          |     |  |
| gland   | straw | Positive | Neurodegeneration                            | 1.92E-05 | 82  |  |
| Mammary | Rice  |          |                                              |          |     |  |
| gland   | straw | Positive | cell movement of fibroblasts                 | 2.02E-05 | 53  |  |
| Mammary | Rice  |          |                                              |          |     |  |
| gland   | straw | Positive | behavior                                     | 2.14E-05 | 228 |  |
| Mammary | Rice  |          |                                              |          |     |  |
| gland   | straw | Positive | immune response of cells                     | 2.23E-05 | 140 |  |
| Mammary | Rice  |          |                                              |          |     |  |
| gland   | straw | Positive | congenital anomaly of musculoskeletal system | 2.24E-05 | 175 |  |
| Mammary | Rice  |          |                                              |          |     |  |
| gland   | straw | Positive | development of head                          | 2.48E-05 | 226 |  |
| Mammary | Rice  | Positive | female genital neoplasm                      | 2.49E-05 | 734 |  |

|         |       |          |                                         |          |     |  |
|---------|-------|----------|-----------------------------------------|----------|-----|--|
| gland   | straw |          |                                         |          |     |  |
| Mammary | Rice  |          |                                         |          |     |  |
| gland   | straw | Positive | proliferation of mononuclear leukocytes | 2.71E-05 | 175 |  |
| Mammary | Rice  |          |                                         |          |     |  |
| gland   | straw | Positive | branching of cells                      | 2.71E-05 | 95  |  |
| Mammary | Rice  |          |                                         |          |     |  |
| gland   | straw | Positive | metabolism of membrane lipid derivative | 2.73E-05 | 99  |  |
| Mammary | Rice  |          |                                         |          |     |  |
| gland   | straw | Positive | quantity of phagocytes                  | 2.92E-05 | 107 |  |
| Mammary | Rice  |          |                                         |          |     |  |
| gland   | straw | Positive | fibrogenesis                            | 3.17E-05 | 104 |  |
| Mammary | Rice  |          |                                         |          |     |  |
| gland   | straw | Positive | movement of vascular endothelial cells  | 3.33E-05 | 52  |  |
| Mammary | Rice  |          |                                         |          |     |  |
| gland   | straw | Positive | growth of organism                      | 3.37E-05 | 195 |  |
| Mammary | Rice  |          |                                         |          |     |  |
| gland   | straw | Positive | benign neoplasm of female genital organ | 3.44E-05 | 107 |  |
| Mammary | Rice  |          |                                         |          |     |  |
| gland   | straw | Positive | proliferation of lymphocytes            | 3.44E-05 | 172 |  |
| Mammary | Rice  |          |                                         |          |     |  |
| gland   | straw | Positive | formation of vascular lesion            | 3.52E-05 | 36  |  |
| Mammary | Rice  |          |                                         |          |     |  |
| gland   | straw | Positive | female genital tract serous cancer      | 3.56E-05 | 98  |  |
| Mammary | Rice  |          |                                         |          |     |  |
| gland   | straw | Positive | arthropathy                             | 3.56E-05 | 219 |  |
| Mammary | Rice  |          |                                         |          |     |  |
| gland   | straw | Positive | infection by lentivirus                 | 3.91E-05 | 169 |  |
| Mammary | Rice  |          |                                         |          |     |  |
| gland   | straw | Positive | long-term potentiation                  | 3.91E-05 | 66  |  |
| Mammary | Rice  |          |                                         |          |     |  |
| gland   | straw | Positive | angiogenesis of lesion                  | 4.03E-05 | 39  |  |
| Mammary | Rice  |          |                                         |          |     |  |
| gland   | straw | Positive | necrosis of epithelial tissue           | 4.25E-05 | 142 |  |
| Mammary | Rice  |          |                                         |          |     |  |
| gland   | straw | Positive | autosomal recessive disease             | 4.25E-05 | 212 |  |
| Mammary | Rice  |          |                                         |          |     |  |
| gland   | straw | Positive | formation of actin stress fibers        | 4.26E-05 | 65  |  |
| Mammary | Rice  |          |                                         |          |     |  |
| gland   | straw | Positive | cell death of epithelial cells          | 4.50E-05 | 122 |  |
| Mammary | Rice  |          |                                         |          |     |  |
| gland   | straw | Positive | development of cardiovascular tissue    | 4.52E-05 | 94  |  |
| Mammary | Rice  |          |                                         |          |     |  |
| gland   | straw | Positive | function of cardiovascular system       | 4.52E-05 | 94  |  |
| Mammary | Rice  | Positive | adenoma                                 | 4.67E-05 | 134 |  |

|         |       |          |                                          |          |     |
|---------|-------|----------|------------------------------------------|----------|-----|
| gland   | straw |          |                                          |          |     |
| Mammary | Rice  |          |                                          |          |     |
| gland   | straw | Positive | morphology of heart ventricle            | 4.67E-05 | 54  |
| Mammary | Rice  |          |                                          |          |     |
| gland   | straw | Positive | inflammatory response                    | 4.67E-05 | 182 |
| Mammary | Rice  |          |                                          |          |     |
| gland   | straw | Positive | HIV infection                            | 4.67E-05 | 168 |
| Mammary | Rice  |          |                                          |          |     |
| gland   | straw | Positive | morphology of nervous system             | 4.68E-05 | 183 |
| Mammary | Rice  |          |                                          |          |     |
| gland   | straw | Positive | function of antigen presenting cells     | 4.68E-05 | 66  |
| Mammary | Rice  |          |                                          |          |     |
| gland   | straw | Positive | accumulation of cells                    | 4.72E-05 | 90  |
| Mammary | Rice  |          |                                          |          |     |
| gland   | straw | Positive | cellular degradation                     | 4.78E-05 | 68  |
| Mammary | Rice  |          |                                          |          |     |
| gland   | straw | Positive | formation of filaments                   | 4.89E-05 | 100 |
| Mammary | Rice  |          |                                          |          |     |
| gland   | straw | Positive | abnormal morphology of head              | 4.99E-05 | 193 |
| Mammary | Rice  |          |                                          |          |     |
| gland   | straw | Positive | fatty acid metabolism                    | 5.10E-05 | 144 |
| Mammary | Rice  |          |                                          |          |     |
| gland   | straw | Positive | genital tumor                            | 5.39E-05 | 823 |
| Mammary | Rice  |          |                                          |          |     |
| gland   | straw | Positive | apoptosis of cervical cancer cell lines  | 5.46E-05 | 74  |
| Mammary | Rice  |          |                                          |          |     |
| gland   | straw | Positive | endothelial cell development             | 5.55E-05 | 90  |
| Mammary | Rice  |          |                                          |          |     |
| gland   | straw | Positive | colony formation                         | 5.55E-05 | 130 |
| Mammary | Rice  |          |                                          |          |     |
| gland   | straw | Positive | neuritogenesis                           | 5.55E-05 | 140 |
| Mammary | Rice  |          |                                          |          |     |
| gland   | straw | Positive | arthritis                                | 6.03E-05 | 214 |
| Mammary | Rice  |          |                                          |          |     |
| gland   | straw | Positive | activation of Protein kinase             | 6.54E-05 | 67  |
| Mammary | Rice  |          |                                          |          |     |
| gland   | straw | Positive | cell death of cervical cancer cell lines | 6.81E-05 | 89  |
| Mammary | Rice  |          |                                          |          |     |
| gland   | straw | Positive | T cell homeostasis                       | 7.32E-05 | 125 |
| Mammary | Rice  |          |                                          |          |     |
| gland   | straw | Positive | cellular infiltration                    | 7.38E-05 | 108 |
| Mammary | Rice  |          |                                          |          |     |
| gland   | straw | Positive | accumulation of blood cells              | 7.43E-05 | 73  |
| Mammary | Rice  | Positive | T cell development                       | 7.56E-05 | 122 |

|         |       |          |                                           |          |     |  |
|---------|-------|----------|-------------------------------------------|----------|-----|--|
| gland   | straw |          |                                           |          |     |  |
| Mammary | Rice  |          |                                           |          |     |  |
| gland   | straw | Positive | cell movement of phagocytes               | 7.76E-05 | 132 |  |
| Mammary | Rice  |          |                                           |          |     |  |
| gland   | straw | Positive | apoptosis of fibroblasts                  | 7.94E-05 | 59  |  |
| Mammary | Rice  |          |                                           |          |     |  |
| gland   | straw | Positive | formation of plasma membrane projections  | 8.10E-05 | 142 |  |
| Mammary | Rice  |          |                                           |          |     |  |
| gland   | straw | Positive | development of endothelial tissue         | 8.20E-05 | 92  |  |
| Mammary | Rice  |          |                                           |          |     |  |
| gland   | straw | Positive | differentiation of leukocytes             | 8.41E-05 | 158 |  |
| Mammary | Rice  |          |                                           |          |     |  |
| gland   | straw | Positive | homeostasis of leukocytes                 | 8.41E-05 | 133 |  |
| Mammary | Rice  |          |                                           |          |     |  |
| gland   | straw | Positive | apoptosis of macrophages                  | 8.45E-05 | 33  |  |
| Mammary | Rice  |          |                                           |          |     |  |
| gland   | straw | Positive | abnormal morphology of nervous system     | 8.54E-05 | 169 |  |
| Mammary | Rice  |          |                                           |          |     |  |
| gland   | straw | Positive | size of body                              | 9.39E-05 | 195 |  |
| Mammary | Rice  |          |                                           |          |     |  |
| gland   | straw | Positive | cognition                                 | 9.57E-05 | 111 |  |
| Mammary | Rice  |          |                                           |          |     |  |
| gland   | straw | Positive | small GTPase mediated signal transduction | 9.60E-05 | 51  |  |
| Mammary | Rice  |          |                                           |          |     |  |
| gland   | straw | Positive | activation of cells                       | 9.75E-05 | 221 |  |
| Mammary | Rice  |          |                                           |          |     |  |
| gland   | straw | Positive | tumorigenesis of gonad                    | 9.84E-05 | 186 |  |
| Mammary | Rice  |          |                                           |          |     |  |
| gland   | straw | Positive | apoptosis of skin                         | 9.87E-05 | 30  |  |
| Mammary | Rice  |          |                                           |          |     |  |
| gland   | straw | Positive | biosynthesis of nucleoside triphosphate   | 1.01E-04 | 33  |  |
| Mammary | Rice  |          |                                           |          |     |  |
| gland   | straw | Positive | sprouting                                 | 1.01E-04 | 96  |  |
| Mammary | Rice  |          |                                           |          |     |  |
| gland   | straw | Positive | formation of actin filaments              | 1.02E-04 | 78  |  |
| Mammary | Rice  |          |                                           |          |     |  |
| gland   | straw | Positive | infection by RNA virus                    | 1.02E-04 | 198 |  |
| Mammary | Rice  |          |                                           |          |     |  |
| gland   | straw | Positive | metastatic colorectal cancer              | 1.02E-04 | 53  |  |
| Mammary | Rice  |          |                                           |          |     |  |
| gland   | straw | Positive | proliferation of T lymphocytes            | 1.02E-04 | 143 |  |
| Mammary | Rice  |          |                                           |          |     |  |
| gland   | straw | Positive | necrosis of liver                         | 1.02E-04 | 63  |  |
| Mammary | Rice  | Positive | morphology of heart                       | 1.14E-04 | 100 |  |

|         |       |          |                                            |          |     |  |
|---------|-------|----------|--------------------------------------------|----------|-----|--|
| gland   | straw |          |                                            |          |     |  |
| Mammary | Rice  |          |                                            |          |     |  |
| gland   | straw | Positive | cell death of fibrosarcoma cell lines      | 1.14E-04 | 25  |  |
| Mammary | Rice  |          |                                            |          |     |  |
| gland   | straw | Positive | breast or ovarian cancer                   | 1.14E-04 | 407 |  |
| Mammary | Rice  |          |                                            |          |     |  |
| gland   | straw | Positive | function of myeloid cells                  | 1.14E-04 | 63  |  |
| Mammary | Rice  |          |                                            |          |     |  |
| gland   | straw | Positive | migration of connective tissue cells       | 1.14E-04 | 50  |  |
| Mammary | Rice  |          |                                            |          |     |  |
| gland   | straw | Positive | cell movement of myeloid cells             | 1.15E-04 | 129 |  |
| Mammary | Rice  |          |                                            |          |     |  |
| gland   | straw | Positive | cell viability of connective tissue cells  | 1.16E-04 | 39  |  |
| Mammary | Rice  |          |                                            |          |     |  |
| gland   | straw | Positive | Lymphocyte homeostasis                     | 1.17E-04 | 130 |  |
| Mammary | Rice  |          |                                            |          |     |  |
| gland   | straw | Positive | hypersensitive reaction                    | 1.19E-04 | 105 |  |
| Mammary | Rice  |          |                                            |          |     |  |
| gland   | straw | Positive | function of phagocytes                     | 1.19E-04 | 78  |  |
| Mammary | Rice  |          |                                            |          |     |  |
| gland   | straw | Positive | advanced stage peripheral arterial disease | 1.25E-04 | 43  |  |
| Mammary | Rice  |          |                                            |          |     |  |
| gland   | straw | Positive | degeneration of neurons                    | 1.25E-04 | 63  |  |
| Mammary | Rice  |          |                                            |          |     |  |
| gland   | straw | Positive | proliferation of endothelial cells         | 1.28E-04 | 79  |  |
| Mammary | Rice  |          |                                            |          |     |  |
| gland   | straw | Positive | ovarian cancer                             | 1.28E-04 | 165 |  |
| Mammary | Rice  |          |                                            |          |     |  |
| gland   | straw | Positive | development of body axis                   | 1.29E-04 | 235 |  |
| Mammary | Rice  |          |                                            |          |     |  |
| gland   | straw | Positive | vascular lesion                            | 1.34E-04 | 60  |  |
| Mammary | Rice  |          |                                            |          |     |  |
| gland   | straw | Positive | immune response of leukocytes              | 1.43E-04 | 78  |  |
| Mammary | Rice  |          |                                            |          |     |  |
| gland   | straw | Positive | oral cavity carcinoma                      | 1.44E-04 | 53  |  |
| Mammary | Rice  |          |                                            |          |     |  |
| gland   | straw | Positive | seizures                                   | 1.46E-04 | 98  |  |
| Mammary | Rice  |          |                                            |          |     |  |
| gland   | straw | Positive | cell movement of connective tissue cells   | 1.46E-04 | 59  |  |
| Mammary | Rice  |          |                                            |          |     |  |
| gland   | straw | Positive | metastatic gastrointestinal tract cancer   | 1.46E-04 | 59  |  |
| Mammary | Rice  |          |                                            |          |     |  |
| gland   | straw | Positive | oral cancer                                | 1.48E-04 | 60  |  |
| Mammary | Rice  | Positive | learning                                   | 1.48E-04 | 102 |  |

|         |       |          |                                       |          |     |  |
|---------|-------|----------|---------------------------------------|----------|-----|--|
| gland   | straw |          |                                       |          |     |  |
| Mammary | Rice  |          |                                       |          |     |  |
| gland   | straw | Positive | atherogenesis                         | 1.48E-04 | 26  |  |
| Mammary | Rice  |          |                                       |          |     |  |
| gland   | straw | Positive | colony formation of cells             | 1.48E-04 | 118 |  |
| Mammary | Rice  |          |                                       |          |     |  |
| gland   | straw | Positive | differentiation of blood cells        | 1.48E-04 | 192 |  |
| Mammary | Rice  |          |                                       |          |     |  |
| gland   | straw | Positive | cell death of fibroblast cell lines   | 1.48E-04 | 104 |  |
| Mammary | Rice  |          |                                       |          |     |  |
| gland   | straw | Positive | hereditary neuropathy                 | 1.48E-04 | 46  |  |
| Mammary | Rice  |          |                                       |          |     |  |
| gland   | straw | Positive | quantity of antigen presenting cells  | 1.48E-04 | 71  |  |
| Mammary | Rice  |          |                                       |          |     |  |
| gland   | straw | Positive | activation of DNA endogenous promoter | 1.51E-04 | 266 |  |
| Mammary | Rice  |          |                                       |          |     |  |
| gland   | straw | Positive | gonadal tumor                         | 1.51E-04 | 187 |  |
| Mammary | Rice  |          |                                       |          |     |  |
| gland   | straw | Positive | Ovarian Cancer and Tumors             | 1.57E-04 | 174 |  |
| Mammary | Rice  |          |                                       |          |     |  |
| gland   | straw | Positive | cell death of tumor                   | 1.58E-04 | 94  |  |
| Mammary | Rice  |          |                                       |          |     |  |
| gland   | straw | Positive | branching of neurons                  | 1.59E-04 | 73  |  |
| Mammary | Rice  |          |                                       |          |     |  |
| gland   | straw | Positive | female genital tract serous carcinoma | 1.59E-04 | 54  |  |
| Mammary | Rice  |          |                                       |          |     |  |
| gland   | straw | Positive | branching of neurites                 | 1.61E-04 | 71  |  |
| Mammary | Rice  |          |                                       |          |     |  |
| gland   | straw | Positive | cell death of lung cell lines         | 1.68E-04 | 18  |  |
| Mammary | Rice  |          |                                       |          |     |  |
| gland   | straw | Positive | transmigration of cells               | 1.69E-04 | 44  |  |
| Mammary | Rice  |          |                                       |          |     |  |
| gland   | straw | Positive | central nervous system tumor          | 1.71E-04 | 206 |  |
| Mammary | Rice  |          |                                       |          |     |  |
| gland   | straw | Positive | cellular infiltration by leukocytes   | 1.79E-04 | 95  |  |
| Mammary | Rice  |          |                                       |          |     |  |
| gland   | straw | Positive | migration of endothelial cells        | 1.79E-04 | 82  |  |
| Mammary | Rice  |          |                                       |          |     |  |
| gland   | straw | Positive | formation of lamellipodia             | 1.79E-04 | 45  |  |
| Mammary | Rice  |          |                                       |          |     |  |
| gland   | straw | Positive | cellular infiltration of cells        | 1.80E-04 | 97  |  |
| Mammary | Rice  |          |                                       |          |     |  |
| gland   | straw | Positive | organization of actin cytoskeleton    | 1.81E-04 | 76  |  |
| Mammary | Rice  | Positive | synthesis of carbohydrate             | 1.85E-04 | 103 |  |

|         |       |          |                                         |          |     |  |
|---------|-------|----------|-----------------------------------------|----------|-----|--|
| gland   | straw |          |                                         |          |     |  |
| Mammary | Rice  |          |                                         |          |     |  |
| gland   | straw | Positive | cell movement of mononuclear leukocytes | 1.85E-04 | 111 |  |
| Mammary | Rice  |          |                                         |          |     |  |
| gland   | straw | Positive | cell death of neuroblastoma cell lines  | 1.87E-04 | 52  |  |
| Mammary | Rice  |          |                                         |          |     |  |
| gland   | straw | Positive | activation of enzyme                    | 1.90E-04 | 95  |  |
| Mammary | Rice  |          |                                         |          |     |  |
| gland   | straw | Positive | spatial learning                        | 1.98E-04 | 50  |  |
| Mammary | Rice  |          |                                         |          |     |  |
| gland   | straw | Positive | necrosis of tumor                       | 2.22E-04 | 93  |  |
| Mammary | Rice  |          |                                         |          |     |  |
| gland   | straw | Positive | neuronal cell death                     | 2.33E-04 | 157 |  |
| Mammary | Rice  |          |                                         |          |     |  |
| gland   | straw | Positive | shape change of neurites                | 2.33E-04 | 72  |  |
| Mammary | Rice  |          |                                         |          |     |  |
| gland   | straw | Positive | metabolism of protein                   | 2.33E-04 | 217 |  |
| Mammary | Rice  |          |                                         |          |     |  |
| gland   | straw | Positive | cell death of tumor cells               | 2.34E-04 | 91  |  |
| Mammary | Rice  |          |                                         |          |     |  |
| gland   | straw | Positive | apoptosis of dermal cells               | 2.37E-04 | 28  |  |
| Mammary | Rice  |          |                                         |          |     |  |
| gland   | straw | Positive | development of hematopoietic system     | 2.46E-04 | 64  |  |
| Mammary | Rice  |          |                                         |          |     |  |
| gland   | straw | Positive | development of vasculature              | 2.47E-04 | 101 |  |
| Mammary | Rice  |          |                                         |          |     |  |
| gland   | straw | Positive | morphogenesis of neurites               | 2.47E-04 | 101 |  |
| Mammary | Rice  |          |                                         |          |     |  |
| gland   | straw | Positive | angiogenesis of tumor                   | 2.47E-04 | 35  |  |
| Mammary | Rice  |          |                                         |          |     |  |
| gland   | straw | Positive | apoptosis of epithelial cells           | 2.51E-04 | 72  |  |
| Mammary | Rice  |          |                                         |          |     |  |
| gland   | straw | Positive | seizure disorder                        | 2.51E-04 | 112 |  |
| Mammary | Rice  |          |                                         |          |     |  |
| gland   | straw | Positive | morphology of connective tissue         | 2.53E-04 | 110 |  |
| Mammary | Rice  |          |                                         |          |     |  |
| gland   | straw | Positive | development of sensory organ            | 2.56E-04 | 132 |  |
| Mammary | Rice  |          |                                         |          |     |  |
| gland   | straw | Positive | abnormal morphology of abdomen          | 2.56E-04 | 197 |  |
| Mammary | Rice  |          |                                         |          |     |  |
| gland   | straw | Positive | cell death of liver cells               | 2.66E-04 | 52  |  |
| Mammary | Rice  |          |                                         |          |     |  |
| gland   | straw | Positive | serous ovarian carcinoma                | 2.73E-04 | 53  |  |
| Mammary | Rice  | Positive | autosomal dominant myopathy             | 2.82E-04 | 27  |  |



|         |       |          |                                            |          |      |  |
|---------|-------|----------|--------------------------------------------|----------|------|--|
| gland   | straw |          |                                            |          |      |  |
| Mammary | Rice  |          |                                            |          |      |  |
| gland   | straw | Positive | migration of fibroblasts                   | 2.93E-04 | 40   |  |
| Mammary | Rice  |          |                                            |          |      |  |
| gland   | straw | Positive | morphogenesis of neurons                   | 2.95E-04 | 102  |  |
| Mammary | Rice  |          |                                            |          |      |  |
| gland   | straw | Positive | contractility of myocardium                | 3.01E-04 | 21   |  |
| Mammary | Rice  |          |                                            |          |      |  |
| gland   | straw | Positive | function of mononuclear leukocytes         | 3.02E-04 | 84   |  |
| Mammary | Rice  |          |                                            |          |      |  |
| gland   | straw | Positive | apoptosis of blood cells                   | 3.07E-04 | 117  |  |
| Mammary | Rice  |          |                                            |          |      |  |
| gland   | straw | Positive | apoptosis of liver cells                   | 3.09E-04 | 43   |  |
| Mammary | Rice  |          |                                            |          |      |  |
| gland   | straw | Positive | apoptosis of antigen presenting cells      | 3.10E-04 | 39   |  |
| Mammary | Rice  |          |                                            |          |      |  |
| gland   | straw | Positive | progression of tumor                       | 3.27E-04 | 44   |  |
| Mammary | Rice  |          |                                            |          |      |  |
| gland   | straw | Positive | cell death of skin                         | 3.34E-04 | 31   |  |
| Mammary | Rice  |          |                                            |          |      |  |
| gland   | straw | Positive | hereditary polyneuropathy                  | 3.40E-04 | 30   |  |
| Mammary | Rice  |          |                                            |          |      |  |
| gland   | straw | Positive | female genital tract cancer                | 3.40E-04 | 689  |  |
| Mammary | Rice  |          |                                            |          |      |  |
| gland   | straw | Positive | quantity of macrophages                    | 3.41E-04 | 53   |  |
| Mammary | Rice  |          |                                            |          |      |  |
| gland   | straw | Positive | advanced malignant solid tumor             | 3.64E-04 | 59   |  |
| Mammary | Rice  |          |                                            |          |      |  |
| gland   | straw | Positive | quantity of T lymphocytes                  | 3.67E-04 | 125  |  |
| Mammary | Rice  |          |                                            |          |      |  |
| gland   | straw | Positive | gliomatosis                                | 3.70E-04 | 179  |  |
| Mammary | Rice  |          |                                            |          |      |  |
| gland   | straw | Positive | cell movement of lymphocytes               | 3.72E-04 | 95   |  |
| Mammary | Rice  |          |                                            |          |      |  |
| gland   | straw | Positive | migration of vascular endothelial cells    | 3.88E-04 | 45   |  |
| Mammary | Rice  |          |                                            |          |      |  |
| gland   | straw | Positive | morphology of cardiac muscle               | 3.88E-04 | 45   |  |
| Mammary | Rice  |          |                                            |          |      |  |
| gland   | straw | Positive | survival of organism                       | 3.97E-04 | 160  |  |
| Mammary | Rice  |          | metastatic malignant neoplasm of digestive |          |      |  |
| gland   | straw | Positive | system                                     | 4.01E-04 | 60   |  |
| Mammary | Rice  |          |                                            |          |      |  |
| gland   | straw | Positive | quantity of connective tissue              | 4.05E-04 | 139  |  |
| Mammary | Rice  | Positive | abdominal adenocarcinoma                   | 4.10E-04 | 1164 |  |

|         |       |          |                                               |          |     |  |
|---------|-------|----------|-----------------------------------------------|----------|-----|--|
| gland   | straw |          |                                               |          |     |  |
| Mammary | Rice  |          |                                               |          |     |  |
| gland   | straw | Positive | tumorigenesis of reproductive tract           | 4.21E-04 | 692 |  |
| Mammary | Rice  |          |                                               |          |     |  |
| gland   | straw | Positive | formation of cells                            | 4.22E-04 | 217 |  |
| Mammary | Rice  |          |                                               |          |     |  |
| gland   | straw | Positive | quantity of lymphatic system component        | 4.22E-04 | 91  |  |
| Mammary | Rice  |          |                                               |          |     |  |
| gland   | straw | Positive | function of lymphocytes                       | 4.22E-04 | 83  |  |
| Mammary | Rice  |          |                                               |          |     |  |
| gland   | straw | Positive | quantity of hematopoietic cells               | 4.22E-04 | 105 |  |
| Mammary | Rice  |          |                                               |          |     |  |
| gland   | straw | Positive | cell movement of muscle cells                 | 4.25E-04 | 48  |  |
| Mammary | Rice  |          |                                               |          |     |  |
| gland   | straw | Positive | epileptic seizure                             | 4.34E-04 | 45  |  |
| Mammary | Rice  |          |                                               |          |     |  |
| gland   | straw | Positive | cell death of renal glomerulus                | 4.35E-04 | 20  |  |
| Mammary | Rice  |          |                                               |          |     |  |
| gland   | straw | Positive | cell spreading                                | 4.43E-04 | 69  |  |
| Mammary | Rice  |          |                                               |          |     |  |
| gland   | straw | Positive | laminopathy                                   | 4.50E-04 | 23  |  |
| Mammary | Rice  |          |                                               |          |     |  |
| gland   | straw | Positive | Dermatitis                                    | 4.52E-04 | 103 |  |
| Mammary | Rice  |          |                                               |          |     |  |
| gland   | straw | Positive | accumulation of leukocytes                    | 4.53E-04 | 67  |  |
| Mammary | Rice  |          |                                               |          |     |  |
| gland   | straw | Positive | infection of cells                            | 4.61E-04 | 179 |  |
| Mammary | Rice  |          |                                               |          |     |  |
| gland   | straw | Positive | hereditary spastic paraplegia                 | 4.64E-04 | 16  |  |
| Mammary | Rice  |          |                                               |          |     |  |
| gland   | straw | Positive | abnormal morphology of heart                  | 4.65E-04 | 92  |  |
| Mammary | Rice  |          |                                               |          |     |  |
| gland   | straw | Positive | secondary neoplasm of digestive system        | 4.65E-04 | 64  |  |
| Mammary | Rice  |          |                                               |          |     |  |
| gland   | straw | Positive | serous neoplasm                               | 4.72E-04 | 140 |  |
| Mammary | Rice  |          |                                               |          |     |  |
| gland   | straw | Positive | cell death of dermal cells                    | 4.82E-04 | 29  |  |
| Mammary | Rice  |          |                                               |          |     |  |
| gland   | straw | Positive | formation of focal adhesions                  | 4.82E-04 | 42  |  |
| Mammary | Rice  |          |                                               |          |     |  |
| gland   | straw | Positive | apoptosis of fibroblast cell lines            | 4.86E-04 | 80  |  |
| Mammary | Rice  |          |                                               |          |     |  |
| gland   | straw | Positive | autophagy                                     | 4.91E-04 | 90  |  |
| Mammary | Rice  | Positive | neuritogenesis of pheochromocytoma cell lines | 4.91E-04 | 10  |  |

|         |       |          |                                                    |          |     |  |
|---------|-------|----------|----------------------------------------------------|----------|-----|--|
| gland   | straw |          |                                                    |          |     |  |
| Mammary | Rice  |          |                                                    |          |     |  |
| gland   | straw | Positive | cell death of breast cancer cell lines             | 5.13E-04 | 81  |  |
| Mammary | Rice  |          |                                                    |          |     |  |
| gland   | straw | Positive | development of lymphatic system                    | 5.18E-04 | 86  |  |
| Mammary | Rice  |          |                                                    |          |     |  |
| gland   | straw | Positive | mixed papillary and follicular thyroid cancer      | 5.19E-04 | 9   |  |
| Mammary | Rice  |          |                                                    |          |     |  |
| gland   | straw | Positive | glioma cancer                                      | 5.37E-04 | 76  |  |
| Mammary | Rice  |          |                                                    |          |     |  |
| gland   | straw | Positive | transactivation                                    | 5.41E-04 | 133 |  |
| Mammary | Rice  |          |                                                    |          |     |  |
| gland   | straw | Positive | peripheral vascular disease                        | 5.51E-04 | 91  |  |
| Mammary | Rice  |          |                                                    |          |     |  |
| gland   | straw | Positive | apoptosis of fibrosarcoma cell lines               | 5.51E-04 | 20  |  |
| Mammary | Rice  |          |                                                    |          |     |  |
| gland   | straw | Positive | quantity of hematopoietic progenitor cells         | 5.60E-04 | 104 |  |
| Mammary | Rice  |          |                                                    |          |     |  |
| gland   | straw | Positive | I-kappaB kinase/NF-kappaB cascade                  | 5.60E-04 | 46  |  |
| Mammary | Rice  |          |                                                    |          |     |  |
| gland   | straw | Positive | breast or colorectal cancer                        | 5.67E-04 | 985 |  |
| Mammary | Rice  |          |                                                    |          |     |  |
| gland   | straw | Positive | tumorigenesis of genital organ                     | 5.80E-04 | 785 |  |
| Mammary | Rice  |          |                                                    |          |     |  |
| gland   | straw | Positive | apoptosis of keratinocytes                         | 5.84E-04 | 25  |  |
| Mammary | Rice  |          |                                                    |          |     |  |
| gland   | straw | Positive | regression of tumor                                | 5.84E-04 | 25  |  |
| Mammary | Rice  |          |                                                    |          |     |  |
| gland   | straw | Positive | hereditary motor and sensory neuropathy            | 5.87E-04 | 27  |  |
| Mammary | Rice  |          |                                                    |          |     |  |
| gland   | straw | Positive | quantity of IL-6 in blood                          | 5.87E-04 | 26  |  |
| Mammary | Rice  |          |                                                    |          |     |  |
| gland   | straw | Positive | Emery-Dreifuss muscular dystrophy                  | 6.03E-04 | 21  |  |
| Mammary | Rice  |          |                                                    |          |     |  |
| gland   | straw | Positive | adhesion of immune cells                           | 6.36E-04 | 84  |  |
| Mammary | Rice  |          |                                                    |          |     |  |
| gland   | straw | Positive | cell movement of antigen presenting cells          | 6.36E-04 | 84  |  |
| Mammary | Rice  |          |                                                    |          |     |  |
| gland   | straw | Positive | cell movement of cancer cells                      | 6.37E-04 | 40  |  |
| Mammary | Rice  |          |                                                    |          |     |  |
| gland   | straw | Positive | cell movement of smooth muscle cells               | 6.42E-04 | 43  |  |
| Mammary | Rice  |          |                                                    |          |     |  |
| gland   | straw | Positive | metabolism of nucleic acid component or derivative | 6.61E-04 | 120 |  |
| Mammary | Rice  | Positive | retinal degeneration                               | 6.64E-04 | 64  |  |

|         |       |          |                                              |          |     |  |
|---------|-------|----------|----------------------------------------------|----------|-----|--|
| gland   | straw |          |                                              |          |     |  |
| Mammary | Rice  |          |                                              |          |     |  |
| gland   | straw | Positive | formation of filopodia                       | 6.64E-04 | 44  |  |
| Mammary | Rice  |          |                                              |          |     |  |
| gland   | straw | Positive | infection by HIV-1                           | 6.76E-04 | 139 |  |
| Mammary | Rice  |          |                                              |          |     |  |
| gland   | straw | Positive | cell viability of carcinoma cell lines       | 6.87E-04 | 39  |  |
| Mammary | Rice  |          |                                              |          |     |  |
| gland   | straw | Positive | sensory neuropathy                           | 6.92E-04 | 28  |  |
| Mammary | Rice  |          |                                              |          |     |  |
| gland   | straw | Positive | advanced stage carcinoma                     | 7.00E-04 | 55  |  |
| Mammary | Rice  |          |                                              |          |     |  |
| gland   | straw | Positive | cell viability of cervical cancer cell lines | 7.00E-04 | 56  |  |
| Mammary | Rice  |          |                                              |          |     |  |
| gland   | straw | Positive | abnormal morphology of heart ventricle       | 7.00E-04 | 46  |  |
| Mammary | Rice  |          |                                              |          |     |  |
| gland   | straw | Positive | apoptosis of epidermal cells                 | 7.06E-04 | 26  |  |
| Mammary | Rice  |          |                                              |          |     |  |
| gland   | straw | Positive | apoptosis of tumor cells                     | 7.08E-04 | 70  |  |
| Mammary | Rice  |          |                                              |          |     |  |
| gland   | straw | Positive | degeneration of eye                          | 7.08E-04 | 65  |  |
| Mammary | Rice  |          |                                              |          |     |  |
| gland   | straw | Positive | cell movement of tumor cells                 | 7.28E-04 | 48  |  |
| Mammary | Rice  |          |                                              |          |     |  |
| gland   | straw | Positive | export of molecule                           | 7.38E-04 | 72  |  |
| Mammary | Rice  |          |                                              |          |     |  |
| gland   | straw | Positive | genital tract cancer                         | 7.49E-04 | 777 |  |
| Mammary | Rice  |          |                                              |          |     |  |
| gland   | straw | Positive | atherosclerotic lesion                       | 7.49E-04 | 41  |  |
| Mammary | Rice  |          |                                              |          |     |  |
| gland   | straw | Positive | contractility of heart                       | 7.86E-04 | 46  |  |
| Mammary | Rice  |          |                                              |          |     |  |
| gland   | straw | Positive | pulmonary interstitial fibrosis              | 7.88E-04 | 7   |  |
| Mammary | Rice  |          |                                              |          |     |  |
| gland   | straw | Positive | activation of leukocytes                     | 7.93E-04 | 157 |  |
| Mammary | Rice  |          |                                              |          |     |  |
| gland   | straw | Positive | size of lesion                               | 7.98E-04 | 63  |  |
| Mammary | Rice  |          |                                              |          |     |  |
| gland   | straw | Positive | formation of thymus gland                    | 8.09E-04 | 43  |  |
| Mammary | Rice  |          |                                              |          |     |  |
| gland   | straw | Positive | head and neck cancer                         | 8.09E-04 | 237 |  |
| Mammary | Rice  |          |                                              |          |     |  |
| gland   | straw | Positive | cell viability of brain cells                | 8.13E-04 | 28  |  |
| Mammary | Rice  | Positive | apoptosis of neuroblastoma cell lines        | 8.41E-04 | 34  |  |

|         |       |          |                                     |          |     |  |
|---------|-------|----------|-------------------------------------|----------|-----|--|
| gland   | straw |          |                                     |          |     |  |
| Mammary | Rice  |          |                                     |          |     |  |
| gland   | straw | Positive | cell death of keratinocytes         | 8.44E-04 | 26  |  |
| Mammary | Rice  |          |                                     |          |     |  |
| gland   | straw | Positive | morphology of cardiovascular tissue | 8.44E-04 | 26  |  |
| Mammary | Rice  |          |                                     |          |     |  |
| gland   | straw | Positive | morphology of endothelial tissue    | 8.46E-04 | 25  |  |
| Mammary | Rice  |          |                                     |          |     |  |
| gland   | straw | Positive | polyneuropathy                      | 8.50E-04 | 31  |  |
| Mammary | Rice  |          |                                     |          |     |  |
| gland   | straw | Positive | connective or soft tissue tumor     | 8.70E-04 | 158 |  |
| Mammary | Rice  |          |                                     |          |     |  |
| gland   | straw | Positive | oral squamous cell carcinoma        | 8.70E-04 | 46  |  |
| Mammary | Rice  |          |                                     |          |     |  |
| gland   | straw | Positive | formation of thymocytes             | 8.91E-04 | 30  |  |
| Mammary | Rice  |          |                                     |          |     |  |
| gland   | straw | Positive | binding of epithelial cell lines    | 8.99E-04 | 13  |  |
| Mammary | Rice  |          |                                     |          |     |  |
| gland   | straw | Positive | necrosis of renal glomerulus        | 8.99E-04 | 18  |  |
| Mammary | Rice  |          |                                     |          |     |  |
| gland   | straw | Positive | glioblastoma cancer                 | 9.11E-04 | 73  |  |
| Mammary | Rice  |          |                                     |          |     |  |
| gland   | straw | Positive | formation of lymphoid organ         | 9.12E-04 | 65  |  |
| Mammary | Rice  |          |                                     |          |     |  |
| gland   | straw | Positive | potentiation of synapse             | 9.12E-04 | 40  |  |
| Mammary | Rice  |          |                                     |          |     |  |
| gland   | straw | Positive | apoptosis of leukocytes             | 9.58E-04 | 106 |  |
| Mammary | Rice  |          |                                     |          |     |  |
| gland   | straw | Positive | cell death of muscle                | 9.58E-04 | 82  |  |
| Mammary | Rice  |          |                                     |          |     |  |
| gland   | straw | Positive | Bleeding                            | 9.79E-04 | 99  |  |
| Mammary | Rice  |          |                                     |          |     |  |
| gland   | straw | Positive | cell death of epidermal cells       | 9.87E-04 | 27  |  |
| Mammary | Rice  |          |                                     |          |     |  |
| gland   | straw | Positive | metabolism of nucleotide            | 9.88E-04 | 102 |  |
| Mammary | Rice  |          |                                     |          |     |  |
| gland   | straw | Positive | dephosphorylation of protein        | 9.98E-04 | 48  |  |
| Mammary | Rice  |          |                                     |          |     |  |
| gland   | straw | Positive | Rheumatic Disease                   | 9.98E-04 | 233 |  |
| Mammary | Rice  |          |                                     |          |     |  |
| gland   | straw | Positive | concentration of fatty acid         | 1.02E-03 | 68  |  |
| Mammary | Rice  |          |                                     |          |     |  |
| gland   | straw | Positive | morphology of eye                   | 1.02E-03 | 68  |  |
| Mammary | Rice  | Positive | growth of embryo                    | 1.03E-03 | 110 |  |

|         |       |          |                                             |          |     |  |
|---------|-------|----------|---------------------------------------------|----------|-----|--|
| gland   | straw |          |                                             |          |     |  |
| Mammary | Rice  |          |                                             |          |     |  |
| gland   | straw | Positive | gastrointestinal tract cancer               | 1.05E-03 | 998 |  |
| Mammary | Rice  |          |                                             |          |     |  |
| gland   | straw | Positive | abnormal morphology of lymphoid organ       | 1.08E-03 | 89  |  |
| Mammary | Rice  |          |                                             |          |     |  |
| gland   | straw | Positive | cell viability of fibroblast cell lines     | 1.09E-03 | 32  |  |
| Mammary | Rice  |          | autosomal dominant Emery-Dreifuss muscular  |          |     |  |
| gland   | straw | Positive | dystrophy                                   | 1.10E-03 | 20  |  |
| Mammary | Rice  |          |                                             |          |     |  |
| gland   | straw | Positive | abnormal morphology of eye                  | 1.10E-03 | 64  |  |
| Mammary | Rice  |          |                                             |          |     |  |
| gland   | straw | Positive | morphology of lymphatic system component    | 1.12E-03 | 97  |  |
| Mammary | Rice  |          |                                             |          |     |  |
| gland   | straw | Positive | differentiation of tumor cell lines         | 1.16E-03 | 89  |  |
| Mammary | Rice  |          |                                             |          |     |  |
| gland   | straw | Positive | apoptosis of hepatoma cell lines            | 1.18E-03 | 40  |  |
| Mammary | Rice  |          |                                             |          |     |  |
| gland   | straw | Positive | progressive motor neuropathy                | 1.21E-03 | 119 |  |
| Mammary | Rice  |          | abnormal morphology of vascular endothelial |          |     |  |
| gland   | straw | Positive | cells                                       | 1.22E-03 | 15  |  |
| Mammary | Rice  |          |                                             |          |     |  |
| gland   | straw | Positive | transformation of fibroblast cell lines     | 1.23E-03 | 63  |  |
| Mammary | Rice  |          |                                             |          |     |  |
| gland   | straw | Positive | female genital tract adenocarcinoma         | 1.24E-03 | 583 |  |
| Mammary | Rice  |          |                                             |          |     |  |
| gland   | straw | Positive | amyotrophic lateral sclerosis               | 1.24E-03 | 55  |  |
| Mammary | Rice  |          |                                             |          |     |  |
| gland   | straw | Positive | migration of mononuclear leukocytes         | 1.24E-03 | 87  |  |
| Mammary | Rice  |          |                                             |          |     |  |
| gland   | straw | Positive | G2/M phase of fibroblasts                   | 1.24E-03 | 6   |  |
| Mammary | Rice  |          |                                             |          |     |  |
| gland   | straw | Positive | quantity of metal                           | 1.25E-03 | 114 |  |
| Mammary | Rice  |          |                                             |          |     |  |
| gland   | straw | Positive | formation of T lymphocytes                  | 1.25E-03 | 32  |  |
| Mammary | Rice  |          |                                             |          |     |  |
| gland   | straw | Positive | gastrointestinal carcinoma                  | 1.28E-03 | 897 |  |
| Mammary | Rice  |          |                                             |          |     |  |
| gland   | straw | Positive | necrosis of muscle                          | 1.32E-03 | 81  |  |
| Mammary | Rice  |          |                                             |          |     |  |
| gland   | straw | Positive | uterine tumor                               | 1.34E-03 | 642 |  |
| Mammary | Rice  |          |                                             |          |     |  |
| gland   | straw | Positive | Ras protein signal transduction             | 1.38E-03 | 20  |  |
| Mammary | Rice  | Positive | migration of cancer cells                   | 1.39E-03 | 49  |  |

|         |       |          |                                         |          |      |  |
|---------|-------|----------|-----------------------------------------|----------|------|--|
| gland   | straw |          |                                         |          |      |  |
| Mammary | Rice  |          |                                         |          |      |  |
| gland   | straw | Positive | generation of leukocytes                | 1.41E-03 | 42   |  |
| Mammary | Rice  |          |                                         |          |      |  |
| gland   | straw | Positive | gait disturbance                        | 1.44E-03 | 36   |  |
| Mammary | Rice  |          |                                         |          |      |  |
| gland   | straw | Positive | long-term potentiation of synapse       | 1.45E-03 | 39   |  |
| Mammary | Rice  |          |                                         |          |      |  |
| gland   | straw | Positive | vascularization                         | 1.45E-03 | 58   |  |
| Mammary | Rice  |          |                                         |          |      |  |
| gland   | straw | Positive | head and neck carcinoma                 | 1.45E-03 | 109  |  |
| Mammary | Rice  |          |                                         |          |      |  |
| gland   | straw | Positive | cell death of blood cells               | 1.45E-03 | 154  |  |
| Mammary | Rice  |          |                                         |          |      |  |
| gland   | straw | Positive | formation of lymphatic system component | 1.46E-03 | 70   |  |
| Mammary | Rice  |          |                                         |          |      |  |
| gland   | straw | Positive | activation of blood cells               | 1.46E-03 | 165  |  |
| Mammary | Rice  |          |                                         |          |      |  |
| gland   | straw | Positive | proliferation of hematopoietic cells    | 1.48E-03 | 62   |  |
| Mammary | Rice  |          |                                         |          |      |  |
| gland   | straw | Positive | oral tumor                              | 1.49E-03 | 72   |  |
| Mammary | Rice  |          |                                         |          |      |  |
| gland   | straw | Positive | apoptosis of breast cancer cell lines   | 1.49E-03 | 69   |  |
| Mammary | Rice  |          |                                         |          |      |  |
| gland   | straw | Positive | quantity of lesion                      | 1.49E-03 | 46   |  |
| Mammary | Rice  |          |                                         |          |      |  |
| gland   | straw | Positive | muscular hypertrophy                    | 1.52E-03 | 51   |  |
| Mammary | Rice  |          |                                         |          |      |  |
| gland   | straw | Positive | cell cycle progression                  | 1.54E-03 | 225  |  |
| Mammary | Rice  |          |                                         |          |      |  |
| gland   | straw | Positive | liver tumor                             | 1.55E-03 | 862  |  |
| Mammary | Rice  |          |                                         |          |      |  |
| gland   | straw | Positive | morphology of lymphoid organ            | 1.60E-03 | 91   |  |
| Mammary | Rice  |          |                                         |          |      |  |
| gland   | straw | Positive | juvenile dermatomyositis                | 1.61E-03 | 19   |  |
| Mammary | Rice  |          |                                         |          |      |  |
| gland   | straw | Positive | cell death of muscle cells              | 1.61E-03 | 79   |  |
| Mammary | Rice  |          |                                         |          |      |  |
| gland   | straw | Positive | morphology of muscle                    | 1.61E-03 | 79   |  |
| Mammary | Rice  |          |                                         |          |      |  |
| gland   | straw | Positive | attachment of cells                     | 1.61E-03 | 36   |  |
| Mammary | Rice  |          |                                         |          |      |  |
| gland   | straw | Positive | Shock Response                          | 1.61E-03 | 44   |  |
| Mammary | Rice  | Positive | abdominal carcinoma                     | 1.62E-03 | 1171 |  |

|         |       |          |                                           |          |     |  |
|---------|-------|----------|-------------------------------------------|----------|-----|--|
| gland   | straw |          |                                           |          |     |  |
| Mammary | Rice  |          |                                           |          |     |  |
| gland   | straw | Positive | interphase                                | 1.62E-03 | 146 |  |
| Mammary | Rice  |          |                                           |          |     |  |
| gland   | straw | Positive | cell death of macrophages                 | 1.65E-03 | 34  |  |
| Mammary | Rice  |          |                                           |          |     |  |
| gland   | straw | Positive | apoptosis of mesangial cells              | 1.67E-03 | 11  |  |
| Mammary | Rice  |          |                                           |          |     |  |
| gland   | straw | Positive | production of lactic acid                 | 1.67E-03 | 17  |  |
| Mammary | Rice  |          |                                           |          |     |  |
| gland   | straw | Positive | abnormal morphology of endothelial tissue | 1.67E-03 | 20  |  |
| Mammary | Rice  |          |                                           |          |     |  |
| gland   | straw | Positive | function of respiratory system            | 1.67E-03 | 20  |  |
| Mammary | Rice  |          |                                           |          |     |  |
| gland   | straw | Positive | granulation tissue                        | 1.72E-03 | 14  |  |
| Mammary | Rice  |          |                                           |          |     |  |
| gland   | straw | Positive | trafficking of mononuclear leukocytes     | 1.72E-03 | 14  |  |
| Mammary | Rice  |          |                                           |          |     |  |
| gland   | straw | Positive | contractility of cardiac muscle           | 1.74E-03 | 38  |  |
| Mammary | Rice  |          |                                           |          |     |  |
| gland   | straw | Positive | binding of embryonic cell lines           | 1.79E-03 | 12  |  |
| Mammary | Rice  |          |                                           |          |     |  |
| gland   | straw | Positive | cell viability of sarcoma cell lines      | 1.80E-03 | 13  |  |
| Mammary | Rice  |          |                                           |          |     |  |
| gland   | straw | Positive | vaso-occlusion                            | 1.80E-03 | 109 |  |
| Mammary | Rice  |          |                                           |          |     |  |
| gland   | straw | Positive | proliferation of tumor cells              | 1.85E-03 | 107 |  |
| Mammary | Rice  |          |                                           |          |     |  |
| gland   | straw | Positive | contractility of ventricular myocardium   | 1.85E-03 | 18  |  |
| Mammary | Rice  |          |                                           |          |     |  |
| gland   | straw | Positive | hepatobiliary system cancer               | 1.85E-03 | 859 |  |
| Mammary | Rice  |          |                                           |          |     |  |
| gland   | straw | Positive | migration of prostate cancer cells        | 1.86E-03 | 7   |  |
| Mammary | Rice  |          |                                           |          |     |  |
| gland   | straw | Positive | activation of lymphocytes                 | 1.89E-03 | 105 |  |
| Mammary | Rice  |          |                                           |          |     |  |
| gland   | straw | Positive | generation of lymphocytes                 | 1.89E-03 | 37  |  |
| Mammary | Rice  |          |                                           |          |     |  |
| gland   | straw | Positive | proliferation of neuronal cells           | 1.90E-03 | 129 |  |
| Mammary | Rice  |          |                                           |          |     |  |
| gland   | straw | Positive | development of lymphatic system component | 1.93E-03 | 73  |  |
| Mammary | Rice  |          |                                           |          |     |  |
| gland   | straw | Positive | damage of nervous system                  | 1.93E-03 | 55  |  |
| Mammary | Rice  | Positive | recruitment of cells                      | 1.98E-03 | 83  |  |



|         |       |          |                                               |          |      |  |
|---------|-------|----------|-----------------------------------------------|----------|------|--|
| gland   | straw |          |                                               |          |      |  |
| Mammary | Rice  |          |                                               |          |      |  |
| gland   | straw | Positive | urogenital cancer                             | 1.98E-03 | 880  |  |
| Mammary | Rice  |          |                                               |          |      |  |
| gland   | straw | Positive | synthesis of purine nucleotide                | 1.98E-03 | 44   |  |
| Mammary | Rice  |          |                                               |          |      |  |
| gland   | straw | Positive | generation of cells                           | 1.99E-03 | 63   |  |
| Mammary | Rice  |          |                                               |          |      |  |
| gland   | straw | Positive | proliferation of cervical cancer cell lines   | 2.01E-03 | 50   |  |
| Mammary | Rice  |          |                                               |          |      |  |
| gland   | straw | Positive | development of hematopoietic progenitor cells | 2.02E-03 | 48   |  |
| Mammary | Rice  |          |                                               |          |      |  |
| gland   | straw | Positive | Gastrointestinal Tract Cancer and Tumors      | 2.02E-03 | 1009 |  |
| Mammary | Rice  |          |                                               |          |      |  |
| gland   | straw | Positive | interphase of cervical cancer cell lines      | 2.07E-03 | 24   |  |
| Mammary | Rice  |          |                                               |          |      |  |
| gland   | straw | Positive | transactivation of RNA                        | 2.09E-03 | 122  |  |
| Mammary | Rice  |          |                                               |          |      |  |
| gland   | straw | Positive | quantity of metal ion                         | 2.09E-03 | 101  |  |
| Mammary | Rice  |          |                                               |          |      |  |
| gland   | straw | Positive | transmigration of blood cells                 | 2.12E-03 | 34   |  |
| Mammary | Rice  |          |                                               |          |      |  |
| gland   | straw | Positive | occlusion of blood vessel                     | 2.12E-03 | 109  |  |
| Mammary | Rice  |          |                                               |          |      |  |
| gland   | straw | Positive | migration of muscle cells                     | 2.14E-03 | 42   |  |
| Mammary | Rice  |          |                                               |          |      |  |
| gland   | straw | Positive | cell death of hepatoma cell lines             | 2.17E-03 | 43   |  |
| Mammary | Rice  |          |                                               |          |      |  |
| gland   | straw | Positive | epithelial-mesenchymal transition             | 2.20E-03 | 51   |  |
| Mammary | Rice  |          |                                               |          |      |  |
| gland   | straw | Positive | adhesion of blood cells                       | 2.21E-03 | 87   |  |
| Mammary | Rice  |          |                                               |          |      |  |
| gland   | straw | Positive | apoptosis of myeloid cells                    | 2.22E-03 | 47   |  |
| Mammary | Rice  |          |                                               |          |      |  |
| gland   | straw | Positive | apoptosis of phagocytes                       | 2.22E-03 | 47   |  |
| Mammary | Rice  |          |                                               |          |      |  |
| gland   | straw | Positive | liver cancer                                  | 2.24E-03 | 854  |  |
| Mammary | Rice  |          |                                               |          |      |  |
| gland   | straw | Positive | metastatic solid tumor                        | 2.26E-03 | 99   |  |
| Mammary | Rice  |          |                                               |          |      |  |
| gland   | straw | Positive | proliferation of breast cancer cell lines     | 2.26E-03 | 99   |  |
| Mammary | Rice  |          |                                               |          |      |  |
| gland   | straw | Positive | mammary tumor                                 | 2.26E-03 | 340  |  |
| Mammary | Rice  | Positive | synthesis of ATP                              | 2.27E-03 | 26   |  |

|         |       |          |                                       |          |     |  |
|---------|-------|----------|---------------------------------------|----------|-----|--|
| gland   | straw |          |                                       |          |     |  |
| Mammary | Rice  |          |                                       |          |     |  |
| gland   | straw | Positive | trafficking of blood cells            | 2.29E-03 | 18  |  |
| Mammary | Rice  |          |                                       |          |     |  |
| gland   | straw | Positive | synthesis of nucleotide               | 2.29E-03 | 84  |  |
| Mammary | Rice  |          |                                       |          |     |  |
| gland   | straw | Positive | metabolism of sphingolipid            | 2.29E-03 | 36  |  |
| Mammary | Rice  |          |                                       |          |     |  |
| gland   | straw | Positive | inflammation of organ                 | 2.31E-03 | 249 |  |
| Mammary | Rice  |          |                                       |          |     |  |
| gland   | straw | Positive | abnormal posture                      | 2.36E-03 | 25  |  |
| Mammary | Rice  |          |                                       |          |     |  |
| gland   | straw | Positive | apoptosis of melanoma cell lines      | 2.39E-03 | 34  |  |
| Mammary | Rice  |          |                                       |          |     |  |
| gland   | straw | Positive | biosynthesis of purine ribonucleotide | 2.40E-03 | 28  |  |
| Mammary | Rice  |          |                                       |          |     |  |
| gland   | straw | Positive | morphology of endothelial cells       | 2.40E-03 | 19  |  |
| Mammary | Rice  |          |                                       |          |     |  |
| gland   | straw | Positive | cancer of cells                       | 2.40E-03 | 61  |  |
| Mammary | Rice  |          |                                       |          |     |  |
| gland   | straw | Positive | antiviral response of cells           | 2.40E-03 | 16  |  |
| Mammary | Rice  |          |                                       |          |     |  |
| gland   | straw | Positive | apoptosis of retinal cells            | 2.40E-03 | 16  |  |
| Mammary | Rice  |          |                                       |          |     |  |
| gland   | straw | Positive | quantity of smooth muscle cells       | 2.40E-03 | 16  |  |
| Mammary | Rice  |          |                                       |          |     |  |
| gland   | straw | Positive | transport of carbohydrate             | 2.41E-03 | 48  |  |
| Mammary | Rice  |          |                                       |          |     |  |
| gland   | straw | Positive | G2 phase of fibroblasts               | 2.41E-03 | 11  |  |
| Mammary | Rice  |          |                                       |          |     |  |
| gland   | straw | Positive | atrophy of muscle                     | 2.41E-03 | 38  |  |
| Mammary | Rice  |          |                                       |          |     |  |
| gland   | straw | Positive | perinatal death                       | 2.41E-03 | 132 |  |
| Mammary | Rice  |          |                                       |          |     |  |
| gland   | straw | Positive | cell death of melanoma cell lines     | 2.43E-03 | 60  |  |
| Mammary | Rice  |          |                                       |          |     |  |
| gland   | straw | Positive | Lymphocyte migration                  | 2.43E-03 | 80  |  |
| Mammary | Rice  |          |                                       |          |     |  |
| gland   | straw | Positive | Wound                                 | 2.44E-03 | 55  |  |
| Mammary | Rice  |          |                                       |          |     |  |
| gland   | straw | Positive | cell death of sarcoma cell lines      | 2.44E-03 | 55  |  |
| Mammary | Rice  |          |                                       |          |     |  |
| gland   | straw | Positive | vascularization of tumor              | 2.44E-03 | 20  |  |
| Mammary | Rice  | Positive | peripheral neuropathy                 | 2.45E-03 | 39  |  |

|         |       |          |                                                 |          |     |  |
|---------|-------|----------|-------------------------------------------------|----------|-----|--|
| gland   | straw |          |                                                 |          |     |  |
| Mammary | Rice  |          |                                                 |          |     |  |
| gland   | straw | Positive | septic shock                                    | 2.45E-03 | 39  |  |
| Mammary | Rice  |          |                                                 |          |     |  |
| gland   | straw | Positive | synthesis of fatty acid                         | 2.49E-03 | 73  |  |
| Mammary | Rice  |          |                                                 |          |     |  |
| gland   | straw | Positive | secretion of molecule                           | 2.50E-03 | 123 |  |
| Mammary | Rice  |          |                                                 |          |     |  |
| gland   | straw | Positive | hepatocellular carcinoma                        | 2.57E-03 | 827 |  |
| Mammary | Rice  |          |                                                 |          |     |  |
| gland   | straw | Positive | quantity of lymphoid organ                      | 2.57E-03 | 72  |  |
| Mammary | Rice  |          |                                                 |          |     |  |
| gland   | straw | Positive | development of neurons                          | 2.65E-03 | 170 |  |
| Mammary | Rice  |          |                                                 |          |     |  |
| gland   | straw | Positive | occlusion of artery                             | 2.65E-03 | 107 |  |
| Mammary | Rice  |          |                                                 |          |     |  |
| gland   | straw | Positive | demyelination of central nervous system         | 2.69E-03 | 15  |  |
| Mammary | Rice  |          |                                                 |          |     |  |
| gland   | straw | Positive | migration of smooth muscle cells                | 2.69E-03 | 38  |  |
| Mammary | Rice  |          |                                                 |          |     |  |
| gland   | straw | Positive | polyarticular juvenile rheumatoid arthritis     | 2.73E-03 | 25  |  |
| Mammary | Rice  |          |                                                 |          |     |  |
| gland   | straw | Positive | cell death of immune cells                      | 2.73E-03 | 145 |  |
| Mammary | Rice  |          |                                                 |          |     |  |
| gland   | straw | Positive | accumulation of lipid                           | 2.73E-03 | 70  |  |
| Mammary | Rice  |          |                                                 |          |     |  |
| gland   | straw | Positive | dysmyelination                                  | 2.76E-03 | 35  |  |
| Mammary | Rice  |          |                                                 |          |     |  |
| gland   | straw | Positive | endometrium tumor                               | 2.83E-03 | 579 |  |
| Mammary | Rice  |          |                                                 |          |     |  |
| gland   | straw | Positive | metabolism of nucleoside triphosphate           | 2.87E-03 | 36  |  |
| Mammary | Rice  |          |                                                 |          |     |  |
| gland   | straw | Positive | formation of lymphocytes                        | 2.88E-03 | 33  |  |
| Mammary | Rice  |          |                                                 |          |     |  |
| gland   | straw | Positive | growth of plasma membrane projections           | 2.89E-03 | 105 |  |
| Mammary | Rice  |          |                                                 |          |     |  |
| gland   | straw | Positive | growth of yeast                                 | 2.89E-03 | 27  |  |
| Mammary | Rice  |          |                                                 |          |     |  |
| gland   | straw | Positive | apoptosis of muscle                             | 2.95E-03 | 62  |  |
| Mammary | Rice  |          |                                                 |          |     |  |
| gland   | straw | Positive | morphology of myocardium                        | 2.95E-03 | 31  |  |
| Mammary | Rice  |          |                                                 |          |     |  |
| gland   | straw | Positive | proliferation of hematopoietic progenitor cells | 2.98E-03 | 58  |  |
| Mammary | Rice  | Positive | abnormal morphology of digestive system         | 3.05E-03 | 121 |  |

|         |       |          |                                                |          |      |  |
|---------|-------|----------|------------------------------------------------|----------|------|--|
| gland   | straw |          |                                                |          |      |  |
| Mammary | Rice  |          |                                                |          |      |  |
| gland   | straw | Positive | formation of skin lesion                       | 3.05E-03 | 26   |  |
| Mammary | Rice  |          |                                                |          |      |  |
| gland   | straw | Positive | autosomal dominant disease                     | 3.13E-03 | 140  |  |
| Mammary | Rice  |          |                                                |          |      |  |
| gland   | straw | Positive | cell viability of central nervous system cells | 3.19E-03 | 30   |  |
| Mammary | Rice  |          |                                                |          |      |  |
| gland   | straw | Positive | glycolysis of cells                            | 3.19E-03 | 30   |  |
| Mammary | Rice  |          |                                                |          |      |  |
| gland   | straw | Positive | neoplasia of cells                             | 3.19E-03 | 100  |  |
| Mammary | Rice  |          |                                                |          |      |  |
| gland   | straw | Positive | migration of tumor cells                       | 3.24E-03 | 54   |  |
| Mammary | Rice  |          |                                                |          |      |  |
| gland   | straw | Negative | cell death                                     | 1.06E-37 | 1347 |  |
| Mammary | Rice  |          |                                                |          |      |  |
| gland   | straw | Negative | proliferation of cells                         | 7.76E-34 | 1449 |  |
| Mammary | Rice  |          |                                                |          |      |  |
| gland   | straw | Negative | cancer                                         | 9.73E-33 | 3722 |  |
| Mammary | Rice  |          |                                                |          |      |  |
| gland   | straw | Negative | malignant solid tumor                          | 3.27E-31 | 3675 |  |
| Mammary | Rice  |          |                                                |          |      |  |
| gland   | straw | Negative | apoptosis                                      | 5.17E-29 | 1066 |  |
| Mammary | Rice  |          |                                                |          |      |  |
| gland   | straw | Negative | necrosis                                       | 8.84E-29 | 1040 |  |
| Mammary | Rice  |          |                                                |          |      |  |
| gland   | straw | Negative | organismal death                               | 8.41E-27 | 969  |  |
| Mammary | Rice  |          |                                                |          |      |  |
| gland   | straw | Negative | morbidity or mortality                         | 2.40E-26 | 978  |  |
| Mammary | Rice  |          |                                                |          |      |  |
| gland   | straw | Negative | organization of cytoplasm                      | 3.02E-26 | 660  |  |
| Mammary | Rice  |          |                                                |          |      |  |
| gland   | straw | Negative | transport of molecule                          | 2.30E-23 | 677  |  |
| Mammary | Rice  |          |                                                |          |      |  |
| gland   | straw | Negative | organization of cytoskeleton                   | 2.81E-23 | 598  |  |
| Mammary | Rice  |          |                                                |          |      |  |
| gland   | straw | Negative | morphology of cells                            | 1.83E-22 | 791  |  |
| Mammary | Rice  |          |                                                |          |      |  |
| gland   | straw | Negative | tumorigenesis of tissue                        | 1.77E-18 | 3080 |  |
| Mammary | Rice  |          |                                                |          |      |  |
| gland   | straw | Negative | microtubule dynamics                           | 2.19E-18 | 501  |  |
| Mammary | Rice  |          |                                                |          |      |  |
| gland   | straw | Negative | cell movement                                  | 2.32E-18 | 834  |  |
| Mammary | Rice  | Negative | neoplasia of epithelial tissue                 | 2.41E-18 | 3032 |  |

|         |       |          |                                       |          |      |  |
|---------|-------|----------|---------------------------------------|----------|------|--|
| gland   | straw |          |                                       |          |      |  |
| Mammary | Rice  |          |                                       |          |      |  |
| gland   | straw | Negative | epithelial cancer                     | 5.34E-18 | 3003 |  |
| Mammary | Rice  |          |                                       |          |      |  |
| gland   | straw | Negative | cell death of tumor cell lines        | 3.17E-17 | 618  |  |
| Mammary | Rice  |          |                                       |          |      |  |
| gland   | straw | Negative | abdominal neoplasm                    | 1.52E-16 | 2998 |  |
| Mammary | Rice  |          |                                       |          |      |  |
| gland   | straw | Negative | cell survival                         | 1.91E-16 | 567  |  |
| Mammary | Rice  |          |                                       |          |      |  |
| gland   | straw | Negative | abdominal cancer                      | 4.44E-16 | 2962 |  |
| Mammary | Rice  |          |                                       |          |      |  |
| gland   | straw | Negative | differentiation of cells              | 7.12E-16 | 862  |  |
| Mammary | Rice  |          |                                       |          |      |  |
| gland   | straw | Negative | cellular homeostasis                  | 2.33E-15 | 607  |  |
| Mammary | Rice  |          |                                       |          |      |  |
| gland   | straw | Negative | expression of RNA                     | 2.55E-15 | 823  |  |
| Mammary | Rice  |          |                                       |          |      |  |
| gland   | straw | Negative | migration of cells                    | 6.51E-15 | 737  |  |
| Mammary | Rice  |          |                                       |          |      |  |
| gland   | straw | Negative | cell viability                        | 8.19E-15 | 526  |  |
| Mammary | Rice  |          |                                       |          |      |  |
| gland   | straw | Negative | angiogenesis                          | 1.52E-14 | 383  |  |
| Mammary | Rice  |          |                                       |          |      |  |
| gland   | straw | Negative | Movement Disorders                    | 5.57E-14 | 436  |  |
| Mammary | Rice  |          |                                       |          |      |  |
| gland   | straw | Negative | cell movement of tumor cell lines     | 6.11E-14 | 360  |  |
| Mammary | Rice  |          |                                       |          |      |  |
| gland   | straw | Negative | vasculogenesis                        | 1.19E-13 | 316  |  |
| Mammary | Rice  |          |                                       |          |      |  |
| gland   | straw | Negative | concentration of lipid                | 1.76E-13 | 343  |  |
| Mammary | Rice  |          |                                       |          |      |  |
| gland   | straw | Negative | cell death of connective tissue cells | 2.34E-13 | 264  |  |
| Mammary | Rice  |          |                                       |          |      |  |
| gland   | straw | Negative | apoptosis of tumor cell lines         | 2.34E-13 | 487  |  |
| Mammary | Rice  |          |                                       |          |      |  |
| gland   | straw | Negative | transcription                         | 4.91E-13 | 757  |  |
| Mammary | Rice  |          |                                       |          |      |  |
| gland   | straw | Negative | abnormal morphology of cells          | 9.45E-13 | 503  |  |
| Mammary | Rice  |          |                                       |          |      |  |
| gland   | straw | Negative | transcription of RNA                  | 1.56E-12 | 707  |  |
| Mammary | Rice  |          |                                       |          |      |  |
| gland   | straw | Negative | morphology of cardiovascular system   | 1.89E-12 | 267  |  |
| Mammary | Rice  | Negative | formation of cellular protrusions     | 1.96E-12 | 372  |  |

|         |       |          |                                          |  |          |      |
|---------|-------|----------|------------------------------------------|--|----------|------|
| gland   | straw |          |                                          |  |          |      |
| Mammary | Rice  |          |                                          |  |          |      |
| gland   | straw | Negative | size of body                             |  | 1.98E-12 | 353  |
| Mammary | Rice  |          |                                          |  |          |      |
| gland   | straw | Negative | proliferation of tumor cell lines        |  | 4.12E-12 | 598  |
| Mammary | Rice  |          |                                          |  |          |      |
| gland   | straw | Negative | development of vasculature               |  | 5.26E-12 | 188  |
| Mammary | Rice  |          |                                          |  |          |      |
| gland   | straw | Negative | digestive system cancer                  |  | 9.85E-12 | 2550 |
| Mammary | Rice  |          |                                          |  |          |      |
| gland   | straw | Negative | invasion of cells                        |  | 1.45E-11 | 356  |
| Mammary | Rice  |          |                                          |  |          |      |
| gland   | straw | Negative | digestive organ tumor                    |  | 1.45E-11 | 2571 |
| Mammary | Rice  |          |                                          |  |          |      |
| gland   | straw | Negative | development of body trunk                |  | 1.69E-11 | 444  |
| Mammary | Rice  |          |                                          |  |          |      |
| gland   | straw | Negative | necrosis of epithelial tissue            |  | 7.80E-11 | 249  |
| Mammary | Rice  |          |                                          |  |          |      |
| gland   | straw | Negative | cell death of epithelial cells           |  | 9.04E-11 | 214  |
| Mammary | Rice  |          |                                          |  |          |      |
| gland   | straw | Negative | Viral Infection                          |  | 1.31E-10 | 611  |
| Mammary | Rice  |          |                                          |  |          |      |
| gland   | straw | Negative | cell death of cervical cancer cell lines |  | 1.45E-10 | 157  |
| Mammary | Rice  |          |                                          |  |          |      |
| gland   | straw | Negative | proliferation of connective tissue cells |  | 1.87E-10 | 249  |
| Mammary | Rice  |          |                                          |  |          |      |
| gland   | straw | Negative | development of cytoplasm                 |  | 2.64E-10 | 199  |
| Mammary | Rice  |          |                                          |  |          |      |
| gland   | straw | Negative | quantity of cells                        |  | 2.64E-10 | 662  |
| Mammary | Rice  |          |                                          |  |          |      |
| gland   | straw | Negative | degeneration of nervous system           |  | 3.17E-10 | 131  |
| Mammary | Rice  |          |                                          |  |          |      |
| gland   | straw | Negative | Organ Degeneration                       |  | 4.46E-10 | 210  |
| Mammary | Rice  |          |                                          |  |          |      |
| gland   | straw | Negative | protein kinase cascade                   |  | 6.70E-10 | 182  |
| Mammary | Rice  |          |                                          |  |          |      |
| gland   | straw | Negative | cell viability of tumor cell lines       |  | 6.75E-10 | 315  |
| Mammary | Rice  |          |                                          |  |          |      |
| gland   | straw | Negative | perinatal death                          |  | 7.32E-10 | 247  |
| Mammary | Rice  |          |                                          |  |          |      |
| gland   | straw | Negative | dyskinesia                               |  | 8.85E-10 | 255  |
| Mammary | Rice  |          |                                          |  |          |      |
| gland   | straw | Negative | disorder of basal ganglia                |  | 9.06E-10 | 310  |
| Mammary | Rice  | Negative | formation of cytoskeleton                |  | 9.73E-10 | 164  |

|         |       |          |                                              |          |     |  |
|---------|-------|----------|----------------------------------------------|----------|-----|--|
| gland   | straw |          |                                              |          |     |  |
| Mammary | Rice  |          |                                              |          |     |  |
| gland   | straw | Negative | autosomal recessive disease                  | 1.22E-09 | 365 |  |
| Mammary | Rice  |          |                                              |          |     |  |
| gland   | straw | Negative | abnormal morphology of cardiovascular system | 1.23E-09 | 236 |  |
| Mammary | Rice  |          |                                              |          |     |  |
| gland   | straw | Negative | migration of tumor cell lines                | 1.46E-09 | 287 |  |
| Mammary | Rice  |          |                                              |          |     |  |
| gland   | straw | Negative | growth of connective tissue                  | 1.51E-09 | 264 |  |
| Mammary | Rice  |          |                                              |          |     |  |
| gland   | straw | Negative | phosphorylation of protein                   | 1.82E-09 | 297 |  |
| Mammary | Rice  |          |                                              |          |     |  |
| gland   | straw | Negative | metabolism of carbohydrate                   | 1.88E-09 | 255 |  |
| Mammary | Rice  |          |                                              |          |     |  |
| gland   | straw | Negative | neurological signs                           | 1.99E-09 | 266 |  |
| Mammary | Rice  |          |                                              |          |     |  |
| gland   | straw | Negative | synthesis of lipid                           | 2.08E-09 | 289 |  |
| Mammary | Rice  |          |                                              |          |     |  |
| gland   | straw | Negative | cell death of fibroblast cell lines          | 2.35E-09 | 182 |  |
| Mammary | Rice  |          |                                              |          |     |  |
| gland   | straw | Negative | neuromuscular disease                        | 3.09E-09 | 349 |  |
| Mammary | Rice  |          |                                              |          |     |  |
| gland   | straw | Negative | concentration of fatty acid                  | 3.18E-09 | 125 |  |
| Mammary | Rice  |          |                                              |          |     |  |
| gland   | straw | Negative | transcription of DNA                         | 3.36E-09 | 575 |  |
| Mammary | Rice  |          |                                              |          |     |  |
| gland   | straw | Negative | Neurodegeneration                            | 4.30E-09 | 136 |  |
| Mammary | Rice  |          |                                              |          |     |  |
| gland   | straw | Negative | Huntington's Disease                         | 4.71E-09 | 236 |  |
| Mammary | Rice  |          |                                              |          |     |  |
| gland   | straw | Negative | transport of carbohydrate                    | 5.08E-09 | 91  |  |
| Mammary | Rice  |          |                                              |          |     |  |
| gland   | straw | Negative | degeneration of cells                        | 5.83E-09 | 149 |  |
| Mammary | Rice  |          |                                              |          |     |  |
| gland   | straw | Negative | quantity of leukocytes                       | 6.18E-09 | 359 |  |
| Mammary | Rice  |          |                                              |          |     |  |
| gland   | straw | Negative | Growth Failure                               | 7.16E-09 | 244 |  |
| Mammary | Rice  |          |                                              |          |     |  |
| gland   | straw | Negative | invasion of tumor cell lines                 | 9.05E-09 | 268 |  |
| Mammary | Rice  |          |                                              |          |     |  |
| gland   | straw | Negative | morphology of body cavity                    | 1.05E-08 | 455 |  |
| Mammary | Rice  |          |                                              |          |     |  |
| gland   | straw | Negative | fibrogenesis                                 | 1.50E-08 | 173 |  |
| Mammary | Rice  | Negative | cell death of epithelial cell lines          | 1.55E-08 | 124 |  |

|         |       |          |                                              |          |     |  |
|---------|-------|----------|----------------------------------------------|----------|-----|--|
| gland   | straw |          |                                              |          |     |  |
| Mammary | Rice  |          |                                              |          |     |  |
| gland   | straw | Negative | abnormal morphology of thoracic cavity       | 1.62E-08 | 238 |  |
| Mammary | Rice  |          |                                              |          |     |  |
| gland   | straw | Negative | apoptosis of fibroblast cell lines           | 2.09E-08 | 141 |  |
| Mammary | Rice  |          |                                              |          |     |  |
| gland   | straw | Negative | development of leukocytes                    | 2.42E-08 | 238 |  |
| Mammary | Rice  |          |                                              |          |     |  |
| gland   | straw | Negative | development of lymphocytes                   | 2.46E-08 | 225 |  |
| Mammary | Rice  |          |                                              |          |     |  |
| gland   | straw | Negative | apoptosis of cervical cancer cell lines      | 2.57E-08 | 123 |  |
| Mammary | Rice  |          |                                              |          |     |  |
| gland   | straw | Negative | development of blood cells                   | 2.82E-08 | 261 |  |
| Mammary | Rice  |          |                                              |          |     |  |
| gland   | straw | Negative | growth of lesion                             | 3.19E-08 | 313 |  |
| Mammary | Rice  |          |                                              |          |     |  |
| gland   | straw | Negative | development of mononuclear leukocytes        | 3.20E-08 | 226 |  |
| Mammary | Rice  |          |                                              |          |     |  |
| gland   | straw | Negative | quantity of blood cells                      | 3.21E-08 | 394 |  |
| Mammary | Rice  |          |                                              |          |     |  |
| gland   | straw | Negative | growth of tumor                              | 3.90E-08 | 312 |  |
| Mammary | Rice  |          |                                              |          |     |  |
| gland   | straw | Negative | cell viability of cervical cancer cell lines | 4.07E-08 | 99  |  |
| Mammary | Rice  |          |                                              |          |     |  |
| gland   | straw | Negative | growth of organism                           | 4.20E-08 | 326 |  |
| Mammary | Rice  |          |                                              |          |     |  |
| gland   | straw | Negative | abnormal morphology of body cavity           | 5.94E-08 | 432 |  |
| Mammary | Rice  |          |                                              |          |     |  |
| gland   | straw | Negative | organization of organelle                    | 6.02E-08 | 218 |  |
| Mammary | Rice  |          |                                              |          |     |  |
| gland   | straw | Negative | secretory pathway                            | 8.18E-08 | 89  |  |
| Mammary | Rice  |          |                                              |          |     |  |
| gland   | straw | Negative | neuronal cell death                          | 8.54E-08 | 269 |  |
| Mammary | Rice  |          |                                              |          |     |  |
| gland   | straw | Negative | cell transformation                          | 1.02E-07 | 188 |  |
| Mammary | Rice  |          |                                              |          |     |  |
| gland   | straw | Negative | growth of epithelial tissue                  | 1.07E-07 | 268 |  |
| Mammary | Rice  |          |                                              |          |     |  |
| gland   | straw | Negative | T cell development                           | 1.31E-07 | 203 |  |
| Mammary | Rice  |          |                                              |          |     |  |
| gland   | straw | Negative | growth of muscle tissue                      | 1.33E-07 | 155 |  |
| Mammary | Rice  |          |                                              |          |     |  |
| gland   | straw | Negative | proliferation of muscle cells                | 1.50E-07 | 154 |  |
| Mammary | Rice  | Negative | cellular degradation                         | 1.52E-07 | 110 |  |



|         |       |          |                                           |          |     |  |
|---------|-------|----------|-------------------------------------------|----------|-----|--|
| gland   | straw |          |                                           |          |     |  |
| Mammary | Rice  |          |                                           |          |     |  |
| gland   | straw | Negative | small GTPase mediated signal transduction | 1.75E-07 | 83  |  |
| Mammary | Rice  |          |                                           |          |     |  |
| gland   | straw | Negative | growth of embryo                          | 1.75E-07 | 193 |  |
| Mammary | Rice  |          |                                           |          |     |  |
| gland   | straw | Negative | degeneration of neurons                   | 1.85E-07 | 104 |  |
| Mammary | Rice  |          |                                           |          |     |  |
| gland   | straw | Negative | cell spreading                            | 2.10E-07 | 118 |  |
| Mammary | Rice  |          |                                           |          |     |  |
| gland   | straw | Negative | apoptosis of epithelial cell lines        | 2.21E-07 | 98  |  |
| Mammary | Rice  |          |                                           |          |     |  |
| gland   | straw | Negative | transport of monosaccharide               | 2.24E-07 | 73  |  |
| Mammary | Rice  |          |                                           |          |     |  |
| gland   | straw | Negative | formation of filaments                    | 2.51E-07 | 163 |  |
| Mammary | Rice  |          |                                           |          |     |  |
| gland   | straw | Negative | proliferation of smooth muscle cells      | 2.63E-07 | 121 |  |
| Mammary | Rice  |          |                                           |          |     |  |
| gland   | straw | Negative | metabolism of protein                     | 3.25E-07 | 369 |  |
| Mammary | Rice  |          |                                           |          |     |  |
| gland   | straw | Negative | ubiquitination of protein                 | 3.32E-07 | 138 |  |
| Mammary | Rice  |          |                                           |          |     |  |
| gland   | straw | Negative | homeostasis of leukocytes                 | 3.63E-07 | 220 |  |
| Mammary | Rice  |          |                                           |          |     |  |
| gland   | straw | Negative | Bleeding                                  | 3.95E-07 | 172 |  |
| Mammary | Rice  |          |                                           |          |     |  |
| gland   | straw | Negative | behavior                                  | 3.98E-07 | 374 |  |
| Mammary | Rice  |          |                                           |          |     |  |
| gland   | straw | Negative | Lymphocyte homeostasis                    | 4.38E-07 | 216 |  |
| Mammary | Rice  |          |                                           |          |     |  |
| gland   | straw | Negative | morphology of vessel                      | 5.14E-07 | 128 |  |
| Mammary | Rice  |          |                                           |          |     |  |
| gland   | straw | Negative | transport of protein                      | 5.37E-07 | 126 |  |
| Mammary | Rice  |          |                                           |          |     |  |
| gland   | straw | Negative | cell cycle progression                    | 5.38E-07 | 393 |  |
| Mammary | Rice  |          |                                           |          |     |  |
| gland   | straw | Negative | T cell homeostasis                        | 5.38E-07 | 205 |  |
| Mammary | Rice  |          |                                           |          |     |  |
| gland   | straw | Negative | autophagy                                 | 5.58E-07 | 153 |  |
| Mammary | Rice  |          |                                           |          |     |  |
| gland   | straw | Negative | ubiquitination                            | 5.58E-07 | 139 |  |
| Mammary | Rice  |          |                                           |          |     |  |
| gland   | straw | Negative | colony formation                          | 6.69E-07 | 212 |  |
| Mammary | Rice  | Negative | morphology of heart                       | 7.14E-07 | 164 |  |

|         |       |          |                                              |          |      |
|---------|-------|----------|----------------------------------------------|----------|------|
| gland   | straw |          |                                              |          |      |
| Mammary | Rice  |          |                                              |          |      |
| gland   | straw | Negative | quantity of carbohydrate                     | 7.80E-07 | 205  |
| Mammary | Rice  |          |                                              |          |      |
| gland   | straw | Negative | cell death of immune cells                   | 7.91E-07 | 256  |
| Mammary | Rice  |          |                                              |          |      |
| gland   | straw | Negative | size of animal                               | 8.21E-07 | 79   |
| Mammary | Rice  |          |                                              |          |      |
| gland   | straw | Negative | organization of actin cytoskeleton           | 8.21E-07 | 125  |
| Mammary | Rice  |          |                                              |          |      |
| gland   | straw | Negative | Edema                                        | 8.36E-07 | 141  |
| Mammary | Rice  |          |                                              |          |      |
| gland   | straw | Negative | congenital anomaly of musculoskeletal system | 8.48E-07 | 283  |
| Mammary | Rice  |          |                                              |          |      |
| gland   | straw | Negative | female genital tract serous cancer           | 9.59E-07 | 156  |
| Mammary | Rice  |          |                                              |          |      |
| gland   | straw | Negative | formation of filopodia                       | 9.78E-07 | 74   |
| Mammary | Rice  |          |                                              |          |      |
| gland   | straw | Negative | function of cardiovascular system            | 1.03E-06 | 150  |
| Mammary | Rice  |          |                                              |          |      |
| gland   | straw | Negative | transport of D-hexose                        | 1.07E-06 | 66   |
| Mammary | Rice  |          |                                              |          |      |
| gland   | straw | Negative | cognition                                    | 1.07E-06 | 181  |
| Mammary | Rice  |          |                                              |          |      |
| gland   | straw | Negative | fatty acid metabolism                        | 1.09E-06 | 234  |
| Mammary | Rice  |          |                                              |          |      |
| gland   | straw | Negative | exocytosis                                   | 1.12E-06 | 83   |
| Mammary | Rice  |          |                                              |          |      |
| gland   | straw | Negative | cell death of blood cells                    | 1.15E-06 | 267  |
| Mammary | Rice  |          |                                              |          |      |
| gland   | straw | Negative | metabolism of nucleotide                     | 1.20E-06 | 175  |
| Mammary | Rice  |          |                                              |          |      |
| gland   | straw | Negative | serous neoplasm                              | 1.22E-06 | 237  |
| Mammary | Rice  |          |                                              |          |      |
| gland   | straw | Negative | development of lymphatic system component    | 1.48E-06 | 127  |
| Mammary | Rice  |          |                                              |          |      |
| gland   | straw | Negative | transport of D-glucose                       | 1.48E-06 | 65   |
| Mammary | Rice  |          |                                              |          |      |
| gland   | straw | Negative | activation of cells                          | 1.59E-06 | 366  |
| Mammary | Rice  |          |                                              |          |      |
| gland   | straw | Negative | proliferation of fibroblasts                 | 1.63E-06 | 143  |
| Mammary | Rice  |          |                                              |          |      |
| gland   | straw | Negative | activation of enzyme                         | 1.64E-06 | 156  |
| Mammary | Rice  | Negative | abdominal adenocarcinoma                     | 1.82E-06 | 2000 |

|         |       |          |                                                |          |     |  |
|---------|-------|----------|------------------------------------------------|----------|-----|--|
| gland   | straw |          |                                                |          |     |  |
| Mammary | Rice  |          |                                                |          |     |  |
| gland   | straw | Negative | development of lymphatic system                | 1.97E-06 | 144 |  |
| Mammary | Rice  |          |                                                |          |     |  |
| gland   | straw | Negative | differentiation of leukocytes                  | 2.14E-06 | 258 |  |
| Mammary | Rice  |          | intermediate disease stage peripheral arterial |          |     |  |
| gland   | straw | Negative | disease                                        | 2.20E-06 | 70  |  |
| Mammary | Rice  |          |                                                |          |     |  |
| gland   | straw | Negative | neonatal death                                 | 2.26E-06 | 174 |  |
| Mammary | Rice  |          |                                                |          |     |  |
| gland   | straw | Negative | cell death of kidney cells                     | 2.35E-06 | 141 |  |
| Mammary | Rice  |          |                                                |          |     |  |
| gland   | straw | Negative | colony formation of cells                      | 2.38E-06 | 193 |  |
| Mammary | Rice  |          |                                                |          |     |  |
| gland   | straw | Negative | quantity of mononuclear leukocytes             | 2.41E-06 | 280 |  |
| Mammary | Rice  |          |                                                |          |     |  |
| gland   | straw | Negative | arthropathy                                    | 2.41E-06 | 356 |  |
| Mammary | Rice  |          |                                                |          |     |  |
| gland   | straw | Negative | learning                                       | 2.41E-06 | 166 |  |
| Mammary | Rice  |          |                                                |          |     |  |
| gland   | straw | Negative | transactivation                                | 2.41E-06 | 224 |  |
| Mammary | Rice  |          |                                                |          |     |  |
| gland   | straw | Negative | engulfment of cells                            | 2.49E-06 | 162 |  |
| Mammary | Rice  |          |                                                |          |     |  |
| gland   | straw | Negative | seizures                                       | 2.64E-06 | 159 |  |
| Mammary | Rice  |          |                                                |          |     |  |
| gland   | straw | Negative | proliferation of neuronal cells                | 2.66E-06 | 223 |  |
| Mammary | Rice  |          |                                                |          |     |  |
| gland   | straw | Negative | phosphorylation of L-amino acid                | 2.66E-06 | 93  |  |
| Mammary | Rice  |          |                                                |          |     |  |
| gland   | straw | Negative | arthritis                                      | 2.73E-06 | 350 |  |
| Mammary | Rice  |          |                                                |          |     |  |
| gland   | straw | Negative | uptake of carbohydrate                         | 2.88E-06 | 119 |  |
| Mammary | Rice  |          |                                                |          |     |  |
| gland   | straw | Negative | uptake of monosaccharide                       | 2.96E-06 | 111 |  |
| Mammary | Rice  |          |                                                |          |     |  |
| gland   | straw | Negative | concentration of Ca <sup>2+</sup>              | 2.96E-06 | 58  |  |
| Mammary | Rice  |          |                                                |          |     |  |
| gland   | straw | Negative | morphology of skin                             | 3.14E-06 | 112 |  |
| Mammary | Rice  |          |                                                |          |     |  |
| gland   | straw | Negative | morphology of nervous system                   | 3.38E-06 | 296 |  |
| Mammary | Rice  |          |                                                |          |     |  |
| gland   | straw | Negative | differentiation of lymphocytes                 | 3.74E-06 | 194 |  |
| Mammary | Rice  | Negative | survival of organism                           | 4.41E-06 | 267 |  |

|         |       |          |                                         |          |      |  |
|---------|-------|----------|-----------------------------------------|----------|------|--|
| gland   | straw |          |                                         |          |      |  |
| Mammary | Rice  |          |                                         |          |      |  |
| gland   | straw | Negative | growth of lymphatic system component    | 4.42E-06 | 82   |  |
| Mammary | Rice  |          |                                         |          |      |  |
| gland   | straw | Negative | peripheral arterial disease             | 4.95E-06 | 89   |  |
| Mammary | Rice  |          |                                         |          |      |  |
| gland   | straw | Negative | degeneration of central nervous system  | 4.95E-06 | 59   |  |
| Mammary | Rice  |          | metabolism of nucleic acid component or |          |      |  |
| gland   | straw | Negative | derivative                              | 5.05E-06 | 201  |  |
| Mammary | Rice  |          |                                         |          |      |  |
| gland   | straw | Negative | morphology of blood vessel              | 5.27E-06 | 115  |  |
| Mammary | Rice  |          |                                         |          |      |  |
| gland   | straw | Negative | synthesis of carbohydrate               | 5.27E-06 | 167  |  |
| Mammary | Rice  |          |                                         |          |      |  |
| gland   | straw | Negative | Thrombosis                              | 5.37E-06 | 73   |  |
| Mammary | Rice  |          |                                         |          |      |  |
| gland   | straw | Negative | adenocarcinoma                          | 5.56E-06 | 2186 |  |
| Mammary | Rice  |          |                                         |          |      |  |
| gland   | straw | Negative | function of blood cells                 | 5.56E-06 | 225  |  |
| Mammary | Rice  |          |                                         |          |      |  |
| gland   | straw | Negative | autosomal dominant disease              | 5.56E-06 | 243  |  |
| Mammary | Rice  |          |                                         |          |      |  |
| gland   | straw | Negative | seizure disorder                        | 5.88E-06 | 183  |  |
| Mammary | Rice  |          |                                         |          |      |  |
| gland   | straw | Negative | dysmyelination                          | 5.89E-06 | 60   |  |
| Mammary | Rice  |          |                                         |          |      |  |
| gland   | straw | Negative | uterine serous papillary cancer         | 6.00E-06 | 96   |  |
| Mammary | Rice  |          |                                         |          |      |  |
| gland   | straw | Negative | proliferation of epithelial cells       | 6.36E-06 | 191  |  |
| Mammary | Rice  |          |                                         |          |      |  |
| gland   | straw | Negative | cell movement of fibroblasts            | 6.36E-06 | 78   |  |
| Mammary | Rice  |          |                                         |          |      |  |
| gland   | straw | Negative | differentiation of muscle cell lines    | 6.95E-06 | 70   |  |
| Mammary | Rice  |          |                                         |          |      |  |
| gland   | straw | Negative | formation of lymphatic system component | 7.05E-06 | 118  |  |
| Mammary | Rice  |          |                                         |          |      |  |
| gland   | straw | Negative | metabolism of sphingolipid              | 7.05E-06 | 61   |  |
| Mammary | Rice  |          |                                         |          |      |  |
| gland   | straw | Negative | morphology of head                      | 7.17E-06 | 326  |  |
| Mammary | Rice  |          |                                         |          |      |  |
| gland   | straw | Negative | quantity of lymphocytes                 | 7.43E-06 | 267  |  |
| Mammary | Rice  |          |                                         |          |      |  |
| gland   | straw | Negative | benign neoplasia                        | 7.57E-06 | 343  |  |
| Mammary | Rice  | Negative | peripheral vascular disease             | 7.71E-06 | 150  |  |

|         |       |          |                                            |          |      |  |
|---------|-------|----------|--------------------------------------------|----------|------|--|
| gland   | straw |          |                                            |          |      |  |
| Mammary | Rice  |          |                                            |          |      |  |
| gland   | straw | Negative | formation of skin                          | 7.72E-06 | 145  |  |
| Mammary | Rice  |          |                                            |          |      |  |
| gland   | straw | Negative | proliferation of blood cells               | 7.98E-06 | 314  |  |
| Mammary | Rice  |          |                                            |          |      |  |
| gland   | straw | Negative | differentiation of connective tissue cells | 7.98E-06 | 244  |  |
| Mammary | Rice  |          |                                            |          |      |  |
| gland   | straw | Negative | morphology of bone                         | 8.28E-06 | 175  |  |
| Mammary | Rice  |          |                                            |          |      |  |
| gland   | straw | Negative | cell death of T lymphocytes                | 8.36E-06 | 126  |  |
| Mammary | Rice  |          |                                            |          |      |  |
| gland   | straw | Negative | apoptosis of connective tissue cells       | 8.38E-06 | 119  |  |
| Mammary | Rice  |          |                                            |          |      |  |
| gland   | straw | Negative | gastrointestinal carcinoma                 | 8.50E-06 | 1542 |  |
| Mammary | Rice  |          |                                            |          |      |  |
| gland   | straw | Negative | demyelination                              | 8.50E-06 | 54   |  |
| Mammary | Rice  |          |                                            |          |      |  |
| gland   | straw | Negative | replication of RNA virus                   | 8.86E-06 | 195  |  |
| Mammary | Rice  |          |                                            |          |      |  |
| gland   | straw | Negative | apoptosis of epithelial cells              | 9.46E-06 | 115  |  |
| Mammary | Rice  |          |                                            |          |      |  |
| gland   | straw | Negative | formation of actin filaments               | 9.48E-06 | 122  |  |
| Mammary | Rice  |          |                                            |          |      |  |
| gland   | straw | Negative | metabolism of glycosphingolipid            | 9.82E-06 | 56   |  |
| Mammary | Rice  |          |                                            |          |      |  |
| gland   | straw | Negative | morphology of reproductive system          | 1.04E-05 | 205  |  |
| Mammary | Rice  |          |                                            |          |      |  |
| gland   | straw | Negative | cell death of stem cells                   | 1.04E-05 | 40   |  |
| Mammary | Rice  |          |                                            |          |      |  |
| gland   | straw | Negative | differentiation of mononuclear leukocytes  | 1.04E-05 | 207  |  |
| Mammary | Rice  |          |                                            |          |      |  |
| gland   | straw | Negative | abnormal morphology of abdomen             | 1.04E-05 | 325  |  |
| Mammary | Rice  |          |                                            |          |      |  |
| gland   | straw | Negative | mitosis                                    | 1.05E-05 | 191  |  |
| Mammary | Rice  |          |                                            |          |      |  |
| gland   | straw | Negative | synthesis of nucleotide                    | 1.05E-05 | 143  |  |
| Mammary | Rice  |          |                                            |          |      |  |
| gland   | straw | Negative | quantity of connective tissue              | 1.05E-05 | 229  |  |
| Mammary | Rice  |          |                                            |          |      |  |
| gland   | straw | Negative | cell death of kidney cell lines            | 1.22E-05 | 121  |  |
| Mammary | Rice  |          |                                            |          |      |  |
| gland   | straw | Negative | abnormal morphology of heart               | 1.26E-05 | 150  |  |
| Mammary | Rice  | Negative | concentration of phospholipid              | 1.26E-05 | 77   |  |

|         |       |          |                                            |          |      |  |
|---------|-------|----------|--------------------------------------------|----------|------|--|
| gland   | straw |          |                                            |          |      |  |
| Mammary | Rice  |          |                                            |          |      |  |
| gland   | straw | Negative | differentiation of blood cells             | 1.27E-05 | 313  |  |
| Mammary | Rice  |          |                                            |          |      |  |
| gland   | straw | Negative | proliferation of immune cells              | 1.28E-05 | 295  |  |
| Mammary | Rice  |          |                                            |          |      |  |
| gland   | straw | Negative | breast or colorectal cancer                | 1.37E-05 | 1682 |  |
| Mammary | Rice  |          |                                            |          |      |  |
| gland   | straw | Negative | necrosis of kidney                         | 1.38E-05 | 143  |  |
| Mammary | Rice  |          |                                            |          |      |  |
| gland   | straw | Negative | function of leukocytes                     | 1.40E-05 | 205  |  |
| Mammary | Rice  |          |                                            |          |      |  |
| gland   | straw | Negative | migration of smooth muscle cells           | 1.40E-05 | 64   |  |
| Mammary | Rice  |          |                                            |          |      |  |
| gland   | straw | Negative | activation of Protein kinase               | 1.43E-05 | 102  |  |
| Mammary | Rice  |          |                                            |          |      |  |
| gland   | straw | Negative | concentration of acylglycerol              | 1.53E-05 | 132  |  |
| Mammary | Rice  |          |                                            |          |      |  |
| gland   | straw | Negative | migration of muscle cells                  | 1.61E-05 | 70   |  |
| Mammary | Rice  |          |                                            |          |      |  |
| gland   | straw | Negative | metabolism of membrane lipid derivative    | 1.63E-05 | 151  |  |
| Mammary | Rice  |          |                                            |          |      |  |
| gland   | straw | Negative | cell movement of connective tissue cells   | 1.65E-05 | 91   |  |
| Mammary | Rice  |          |                                            |          |      |  |
| gland   | straw | Negative | movement of vascular endothelial cells     | 1.68E-05 | 76   |  |
| Mammary | Rice  |          |                                            |          |      |  |
| gland   | straw | Negative | formation of cells                         | 1.69E-05 | 360  |  |
| Mammary | Rice  |          |                                            |          |      |  |
| gland   | straw | Negative | cell death of muscle cells                 | 1.74E-05 | 132  |  |
| Mammary | Rice  |          |                                            |          |      |  |
| gland   | straw | Negative | development of endothelial tissue          | 1.77E-05 | 143  |  |
| Mammary | Rice  |          |                                            |          |      |  |
| gland   | straw | Negative | growth of embryonic tissue                 | 1.84E-05 | 110  |  |
| Mammary | Rice  |          |                                            |          |      |  |
| gland   | straw | Negative | cell death of muscle                       | 1.89E-05 | 135  |  |
| Mammary | Rice  |          |                                            |          |      |  |
| gland   | straw | Negative | abnormal morphology of embryonic tissue    | 1.89E-05 | 208  |  |
| Mammary | Rice  |          |                                            |          |      |  |
| gland   | straw | Negative | abnormal morphology of reproductive system | 2.03E-05 | 194  |  |
| Mammary | Rice  |          |                                            |          |      |  |
| gland   | straw | Negative | development of cardiovascular tissue       | 2.05E-05 | 144  |  |
| Mammary | Rice  |          |                                            |          |      |  |
| gland   | straw | Negative | cell death of fibroblasts                  | 2.05E-05 | 106  |  |
| Mammary | Rice  | Negative | formation of lymphoid organ                | 2.05E-05 | 106  |  |

|         |       |          |                                          |          |      |  |
|---------|-------|----------|------------------------------------------|----------|------|--|
| gland   | straw |          |                                          |          |      |  |
| Mammary | Rice  |          |                                          |          |      |  |
| gland   | straw | Negative | biosynthesis of nucleoside triphosphate  | 2.06E-05 | 48   |  |
| Mammary | Rice  |          |                                          |          |      |  |
| gland   | straw | Negative | binding of DNA                           | 2.27E-05 | 198  |  |
| Mammary | Rice  |          |                                          |          |      |  |
| gland   | straw | Negative | cell movement of smooth muscle cells     | 2.39E-05 | 68   |  |
| Mammary | Rice  |          |                                          |          |      |  |
| gland   | straw | Negative | necrosis of muscle                       | 2.39E-05 | 134  |  |
| Mammary | Rice  |          |                                          |          |      |  |
| gland   | straw | Negative | abdominal carcinoma                      | 2.42E-05 | 2012 |  |
| Mammary | Rice  |          |                                          |          |      |  |
| gland   | straw | Negative | synthesis of sphingolipid                | 2.43E-05 | 50   |  |
| Mammary | Rice  |          |                                          |          |      |  |
| gland   | straw | Negative | quantity of B lymphocytes                | 2.43E-05 | 135  |  |
| Mammary | Rice  |          |                                          |          |      |  |
| gland   | straw | Negative | proliferation of fibroblast cell lines   | 2.44E-05 | 163  |  |
| Mammary | Rice  |          |                                          |          |      |  |
| gland   | straw | Negative | metabolism of nucleoside triphosphate    | 2.44E-05 | 60   |  |
| Mammary | Rice  |          |                                          |          |      |  |
| gland   | straw | Negative | abnormal morphology of head              | 2.48E-05 | 307  |  |
| Mammary | Rice  |          |                                          |          |      |  |
| gland   | straw | Negative | replication of virus                     | 2.50E-05 | 212  |  |
| Mammary | Rice  |          |                                          |          |      |  |
| gland   | straw | Negative | apoptosis of kidney cell lines           | 2.65E-05 | 96   |  |
| Mammary | Rice  |          |                                          |          |      |  |
| gland   | straw | Negative | apoptosis of pheochromocytoma cell lines | 2.66E-05 | 42   |  |
| Mammary | Rice  |          |                                          |          |      |  |
| gland   | straw | Negative | cell movement of muscle cells            | 2.70E-05 | 75   |  |
| Mammary | Rice  |          |                                          |          |      |  |
| gland   | straw | Negative | development of epithelial tissue         | 2.71E-05 | 196  |  |
| Mammary | Rice  |          |                                          |          |      |  |
| gland   | straw | Negative | activation of blood cells                | 2.81E-05 | 277  |  |
| Mammary | Rice  |          |                                          |          |      |  |
| gland   | straw | Negative | cell death of lymphocytes                | 2.82E-05 | 149  |  |
| Mammary | Rice  |          |                                          |          |      |  |
| gland   | straw | Negative | formation of plasma membrane projections | 2.97E-05 | 224  |  |
| Mammary | Rice  |          |                                          |          |      |  |
| gland   | straw | Negative | abnormal morphology of nervous system    | 2.99E-05 | 269  |  |
| Mammary | Rice  |          |                                          |          |      |  |
| gland   | straw | Negative | cell death of mononuclear leukocytes     | 2.99E-05 | 153  |  |
| Mammary | Rice  |          |                                          |          |      |  |
| gland   | straw | Negative | gastrointestinal tract cancer            | 3.17E-05 | 1706 |  |
| Mammary | Rice  | Negative | hepatic steatosis                        | 3.20E-05 | 106  |  |

|         |       |          |                                                 |          |      |  |
|---------|-------|----------|-------------------------------------------------|----------|------|--|
| gland   | straw |          |                                                 |          |      |  |
| Mammary | Rice  |          |                                                 |          |      |  |
| gland   | straw | Negative | paraproteinemia                                 | 3.20E-05 | 131  |  |
| Mammary | Rice  |          |                                                 |          |      |  |
| gland   | straw | Negative | morphology of respiratory system                | 3.25E-05 | 122  |  |
| Mammary | Rice  |          |                                                 |          |      |  |
| gland   | straw | Negative | neuritogenesis                                  | 3.27E-05 | 219  |  |
| Mammary | Rice  |          |                                                 |          |      |  |
| gland   | straw | Negative | stress response of cells                        | 3.29E-05 | 59   |  |
| Mammary | Rice  |          |                                                 |          |      |  |
| gland   | straw | Negative | homing of cells                                 | 3.29E-05 | 210  |  |
| Mammary | Rice  |          |                                                 |          |      |  |
| gland   | straw | Negative | congenital malformation of skeleton             | 3.31E-05 | 162  |  |
| Mammary | Rice  |          |                                                 |          |      |  |
| gland   | straw | Negative | endocytosis                                     | 3.40E-05 | 134  |  |
| Mammary | Rice  |          |                                                 |          |      |  |
| gland   | straw | Negative | function of muscle                              | 3.48E-05 | 135  |  |
| Mammary | Rice  |          |                                                 |          |      |  |
| gland   | straw | Negative | endothelial cell development                    | 3.63E-05 | 137  |  |
| Mammary | Rice  |          |                                                 |          |      |  |
| gland   | straw | Negative | growth of skin                                  | 3.63E-05 | 88   |  |
| Mammary | Rice  |          |                                                 |          |      |  |
| gland   | straw | Negative | synthesis of fatty acid                         | 3.68E-05 | 122  |  |
| Mammary | Rice  |          |                                                 |          |      |  |
| gland   | straw | Negative | differentiation of epithelial tissue            | 3.76E-05 | 139  |  |
| Mammary | Rice  |          |                                                 |          |      |  |
| gland   | straw | Negative | proliferation of hematopoietic progenitor cells | 3.76E-05 | 97   |  |
| Mammary | Rice  |          |                                                 |          |      |  |
| gland   | straw | Negative | differentiation of T lymphocytes                | 3.76E-05 | 146  |  |
| Mammary | Rice  |          |                                                 |          |      |  |
| gland   | straw | Negative | synthesis of reactive oxygen species            | 3.80E-05 | 182  |  |
| Mammary | Rice  |          |                                                 |          |      |  |
| gland   | straw | Negative | degeneration of brain                           | 3.83E-05 | 54   |  |
| Mammary | Rice  |          |                                                 |          |      |  |
| gland   | straw | Negative | abnormal morphology of respiratory system       | 3.94E-05 | 120  |  |
| Mammary | Rice  |          |                                                 |          |      |  |
| gland   | straw | Negative | synthesis of ceramide                           | 4.03E-05 | 34   |  |
| Mammary | Rice  |          |                                                 |          |      |  |
| gland   | straw | Negative | Gastrointestinal Tract Cancer and Tumors        | 4.03E-05 | 1731 |  |
| Mammary | Rice  |          |                                                 |          |      |  |
| gland   | straw | Negative | interphase                                      | 4.10E-05 | 244  |  |
| Mammary | Rice  |          |                                                 |          |      |  |
| gland   | straw | Negative | synthesis of glycosphingolipid                  | 4.10E-05 | 45   |  |
| Mammary | Rice  | Negative | proliferation of embryonic cells                | 4.10E-05 | 99   |  |



|         |       |          |                                           |          |     |  |
|---------|-------|----------|-------------------------------------------|----------|-----|--|
| gland   | straw |          |                                           |          |     |  |
| Mammary | Rice  |          |                                           |          |     |  |
| gland   | straw | Negative | infection by RNA virus                    | 4.21E-05 | 317 |  |
| Mammary | Rice  |          |                                           |          |     |  |
| gland   | straw | Negative | MAPKKK cascade                            | 4.22E-05 | 83  |  |
| Mammary | Rice  |          |                                           |          |     |  |
| gland   | straw | Negative | proliferation of epidermal cells          | 4.22E-05 | 70  |  |
| Mammary | Rice  |          |                                           |          |     |  |
| gland   | straw | Negative | cell death of pheochromocytoma cell lines | 4.41E-05 | 52  |  |
| Mammary | Rice  |          |                                           |          |     |  |
| gland   | straw | Negative | plasma cell dyscrasia                     | 4.44E-05 | 130 |  |
| Mammary | Rice  |          |                                           |          |     |  |
| gland   | straw | Negative | accumulation of cells                     | 4.44E-05 | 136 |  |
| Mammary | Rice  |          |                                           |          |     |  |
| gland   | straw | Negative | multiple congenital anomalies             | 4.45E-05 | 161 |  |
| Mammary | Rice  |          |                                           |          |     |  |
| gland   | straw | Negative | proliferation of hematopoietic cells      | 4.45E-05 | 101 |  |
| Mammary | Rice  |          |                                           |          |     |  |
| gland   | straw | Negative | Rheumatic Disease                         | 4.45E-05 | 389 |  |
| Mammary | Rice  |          |                                           |          |     |  |
| gland   | straw | Negative | activation of DNA endogenous promoter     | 4.58E-05 | 433 |  |
| Mammary | Rice  |          |                                           |          |     |  |
| gland   | straw | Negative | abnormal morphology of bone               | 4.62E-05 | 166 |  |
| Mammary | Rice  |          |                                           |          |     |  |
| gland   | straw | Negative | abnormal quantity of lipid                | 4.77E-05 | 62  |  |
| Mammary | Rice  |          |                                           |          |     |  |
| gland   | straw | Negative | abnormal morphology of internal genitalia | 4.89E-05 | 135 |  |
| Mammary | Rice  |          |                                           |          |     |  |
| gland   | straw | Negative | cell death of skin                        | 5.05E-05 | 46  |  |
| Mammary | Rice  |          |                                           |          |     |  |
| gland   | straw | Negative | quantity of IL-6 in blood                 | 5.25E-05 | 39  |  |
| Mammary | Rice  |          |                                           |          |     |  |
| gland   | straw | Negative | biosynthesis of purine ribonucleotide     | 5.37E-05 | 45  |  |
| Mammary | Rice  |          |                                           |          |     |  |
| gland   | straw | Negative | keratosis                                 | 5.62E-05 | 52  |  |
| Mammary | Rice  |          |                                           |          |     |  |
| gland   | straw | Negative | formation of lamellipodia                 | 5.62E-05 | 67  |  |
| Mammary | Rice  |          |                                           |          |     |  |
| gland   | straw | Negative | cell movement of endothelial cells        | 5.66E-05 | 136 |  |
| Mammary | Rice  |          |                                           |          |     |  |
| gland   | straw | Negative | morphology of heart ventricle             | 5.87E-05 | 78  |  |
| Mammary | Rice  |          |                                           |          |     |  |
| gland   | straw | Negative | cell death of tumor                       | 5.88E-05 | 146 |  |
| Mammary | Rice  | Negative | autophagy of cells                        | 5.88E-05 | 104 |  |

|         |       |          |                                       |          |     |  |
|---------|-------|----------|---------------------------------------|----------|-----|--|
| gland   | straw |          |                                       |          |     |  |
| Mammary | Rice  |          |                                       |          |     |  |
| gland   | straw | Negative | dephosphorylation of protein          | 5.97E-05 | 76  |  |
| Mammary | Rice  |          |                                       |          |     |  |
| gland   | straw | Negative | development of abdomen                | 6.00E-05 | 216 |  |
| Mammary | Rice  |          |                                       |          |     |  |
| gland   | straw | Negative | homing                                | 6.03E-05 | 214 |  |
| Mammary | Rice  |          |                                       |          |     |  |
| gland   | straw | Negative | mass of connective tissue             | 6.07E-05 | 81  |  |
| Mammary | Rice  |          |                                       |          |     |  |
| gland   | straw | Negative | uptake of D-hexose                    | 6.10E-05 | 89  |  |
| Mammary | Rice  |          |                                       |          |     |  |
| gland   | straw | Negative | formation of actin stress fibers      | 6.10E-05 | 95  |  |
| Mammary | Rice  |          |                                       |          |     |  |
| gland   | straw | Negative | secretion of molecule                 | 6.10E-05 | 206 |  |
| Mammary | Rice  |          |                                       |          |     |  |
| gland   | straw | Negative | cell movement of myeloid cells        | 6.13E-05 | 202 |  |
| Mammary | Rice  |          |                                       |          |     |  |
| gland   | straw | Negative | metabolism of glycolipid              | 6.61E-05 | 63  |  |
| Mammary | Rice  |          |                                       |          |     |  |
| gland   | straw | Negative | abnormal morphology of blood vessel   | 6.74E-05 | 104 |  |
| Mammary | Rice  |          |                                       |          |     |  |
| gland   | straw | Negative | transactivation of RNA                | 6.76E-05 | 203 |  |
| Mammary | Rice  |          |                                       |          |     |  |
| gland   | straw | Negative | quantity of metal                     | 6.80E-05 | 187 |  |
| Mammary | Rice  |          |                                       |          |     |  |
| gland   | straw | Negative | retinal degeneration                  | 6.88E-05 | 101 |  |
| Mammary | Rice  |          |                                       |          |     |  |
| gland   | straw | Negative | development of hematopoietic system   | 7.01E-05 | 98  |  |
| Mammary | Rice  |          |                                       |          |     |  |
| gland   | straw | Negative | attachment of cells                   | 7.37E-05 | 57  |  |
| Mammary | Rice  |          |                                       |          |     |  |
| gland   | straw | Negative | concentration of phosphatidic acid    | 7.37E-05 | 57  |  |
| Mammary | Rice  |          |                                       |          |     |  |
| gland   | straw | Negative | synthesis of DNA                      | 7.37E-05 | 158 |  |
| Mammary | Rice  |          |                                       |          |     |  |
| gland   | straw | Negative | mass of fat pad                       | 7.40E-05 | 48  |  |
| Mammary | Rice  |          |                                       |          |     |  |
| gland   | straw | Negative | infection of cells                    | 8.04E-05 | 291 |  |
| Mammary | Rice  |          |                                       |          |     |  |
| gland   | straw | Negative | homo-oligomerization of protein       | 8.08E-05 | 56  |  |
| Mammary | Rice  |          |                                       |          |     |  |
| gland   | straw | Negative | metabolism of reactive oxygen species | 8.29E-05 | 187 |  |
| Mammary | Rice  | Negative | experimentally-induced diabetes       | 8.29E-05 | 42  |  |

|         |       |          |                                           |          |      |  |
|---------|-------|----------|-------------------------------------------|----------|------|--|
| gland   | straw |          |                                           |          |      |  |
| Mammary | Rice  |          |                                           |          |      |  |
| gland   | straw | Negative | damage of nervous system                  | 8.38E-05 | 89   |  |
| Mammary | Rice  |          |                                           |          |      |  |
| gland   | straw | Negative | Waldenstrom's macroglobulinemia           | 8.45E-05 | 76   |  |
| Mammary | Rice  |          |                                           |          |      |  |
| gland   | straw | Negative | apoptosis of macrophages                  | 8.51E-05 | 46   |  |
| Mammary | Rice  |          |                                           |          |      |  |
| gland   | straw | Negative | gastrointestinal adenocarcinoma           | 8.80E-05 | 1442 |  |
| Mammary | Rice  |          |                                           |          |      |  |
| gland   | straw | Negative | cell movement of breast cancer cell lines | 8.80E-05 | 112  |  |
| Mammary | Rice  |          |                                           |          |      |  |
| gland   | straw | Negative | outgrowth of plasma membrane projections  | 8.83E-05 | 154  |  |
| Mammary | Rice  |          |                                           |          |      |  |
| gland   | straw | Negative | formation of vascular lesion              | 8.83E-05 | 49   |  |
| Mammary | Rice  |          |                                           |          |      |  |
| gland   | straw | Negative | morphology of connective tissue           | 8.83E-05 | 173  |  |
| Mammary | Rice  |          |                                           |          |      |  |
| gland   | straw | Negative | growth of lymphoid organ                  | 8.87E-05 | 70   |  |
| Mammary | Rice  |          |                                           |          |      |  |
| gland   | straw | Negative | cardiogenesis                             | 8.88E-05 | 177  |  |
| Mammary | Rice  |          |                                           |          |      |  |
| gland   | straw | Negative | migration of vascular endothelial cells   | 8.90E-05 | 68   |  |
| Mammary | Rice  |          |                                           |          |      |  |
| gland   | straw | Negative | aggregation of blood platelets            | 8.95E-05 | 77   |  |
| Mammary | Rice  |          |                                           |          |      |  |
| gland   | straw | Negative | morphogenesis of neurites                 | 8.98E-05 | 158  |  |
| Mammary | Rice  |          |                                           |          |      |  |
| gland   | straw | Negative | morphology of genital organ               | 9.10E-05 | 160  |  |
| Mammary | Rice  |          |                                           |          |      |  |
| gland   | straw | Negative | differentiation of connective tissue      | 9.35E-05 | 267  |  |
| Mammary | Rice  |          |                                           |          |      |  |
| gland   | straw | Negative | migration of connective tissue cells      | 9.40E-05 | 73   |  |
| Mammary | Rice  |          |                                           |          |      |  |
| gland   | straw | Negative | formation of lung                         | 9.67E-05 | 116  |  |
| Mammary | Rice  |          |                                           |          |      |  |
| gland   | straw | Negative | apoptosis of blood cells                  | 9.84E-05 | 185  |  |
| Mammary | Rice  |          |                                           |          |      |  |
| gland   | straw | Negative | apoptosis of carcinoma cell lines         | 9.85E-05 | 96   |  |
| Mammary | Rice  |          |                                           |          |      |  |
| gland   | straw | Negative | morphogenesis of neurons                  | 1.01E-04 | 160  |  |
| Mammary | Rice  |          |                                           |          |      |  |
| gland   | straw | Negative | concentration of triacylglycerol          | 1.01E-04 | 118  |  |
| Mammary | Rice  | Negative | quantity of interleukin                   | 1.02E-04 | 58   |  |

|         |       |          |                                             |          |     |  |
|---------|-------|----------|---------------------------------------------|----------|-----|--|
| gland   | straw |          |                                             |          |     |  |
| Mammary | Rice  |          |                                             |          |     |  |
| gland   | straw | Negative | outgrowth of cells                          | 1.02E-04 | 163 |  |
| Mammary | Rice  |          |                                             |          |     |  |
| gland   | straw | Negative | activation of leukocytes                    | 1.03E-04 | 256 |  |
| Mammary | Rice  |          |                                             |          |     |  |
| gland   | straw | Negative | oligomerization of protein                  | 1.04E-04 | 94  |  |
| Mammary | Rice  |          |                                             |          |     |  |
| gland   | straw | Negative | epileptic seizure                           | 1.07E-04 | 68  |  |
| Mammary | Rice  |          |                                             |          |     |  |
| gland   | straw | Negative | degeneration of eye                         | 1.07E-04 | 102 |  |
| Mammary | Rice  |          |                                             |          |     |  |
| gland   | straw | Negative | necrosis of tumor                           | 1.09E-04 | 144 |  |
| Mammary | Rice  |          |                                             |          |     |  |
| gland   | straw | Negative | morphology of muscle                        | 1.09E-04 | 128 |  |
| Mammary | Rice  |          |                                             |          |     |  |
| gland   | straw | Negative | quantity of cytokine                        | 1.10E-04 | 99  |  |
| Mammary | Rice  |          |                                             |          |     |  |
| gland   | straw | Negative | chronic inflammatory disorder               | 1.11E-04 | 350 |  |
| Mammary | Rice  |          |                                             |          |     |  |
| gland   | straw | Negative | sprouting                                   | 1.11E-04 | 146 |  |
| Mammary | Rice  |          |                                             |          |     |  |
| gland   | straw | Negative | quantity of metal ion                       | 1.14E-04 | 166 |  |
| Mammary | Rice  |          |                                             |          |     |  |
| gland   | straw | Negative | apoptosis of leukocytes                     | 1.16E-04 | 171 |  |
| Mammary | Rice  |          |                                             |          |     |  |
| gland   | straw | Negative | gliosis of brain                            | 1.16E-04 | 21  |  |
| Mammary | Rice  |          |                                             |          |     |  |
| gland   | straw | Negative | paralysis                                   | 1.16E-04 | 67  |  |
| Mammary | Rice  |          |                                             |          |     |  |
| gland   | straw | Negative | blood protein disorder                      | 1.18E-04 | 142 |  |
| Mammary | Rice  |          |                                             |          |     |  |
| gland   | straw | Negative | neurodegeneration of central nervous system | 1.18E-04 | 48  |  |
| Mammary | Rice  |          |                                             |          |     |  |
| gland   | straw | Negative | spatial learning                            | 1.19E-04 | 74  |  |
| Mammary | Rice  |          |                                             |          |     |  |
| gland   | straw | Negative | proliferation of mononuclear leukocytes     | 1.22E-04 | 269 |  |
| Mammary | Rice  |          |                                             |          |     |  |
| gland   | straw | Negative | differentiation of muscle                   | 1.22E-04 | 116 |  |
| Mammary | Rice  |          |                                             |          |     |  |
| gland   | straw | Negative | abnormal morphology of skin                 | 1.24E-04 | 95  |  |
| Mammary | Rice  |          |                                             |          |     |  |
| gland   | straw | Negative | long-term potentiation                      | 1.24E-04 | 95  |  |
| Mammary | Rice  | Negative | cell death of macrophages                   | 1.25E-04 | 53  |  |

|         |       |          |                                      |          |     |  |
|---------|-------|----------|--------------------------------------|----------|-----|--|
| gland   | straw |          |                                      |          |     |  |
| Mammary | Rice  |          |                                      |          |     |  |
| gland   | straw | Negative | formation of thymus gland            | 1.28E-04 | 66  |  |
| Mammary | Rice  |          |                                      |          |     |  |
| gland   | straw | Negative | outgrowth of neurites                | 1.28E-04 | 152 |  |
| Mammary | Rice  |          |                                      |          |     |  |
| gland   | straw | Negative | internalization of protein           | 1.29E-04 | 43  |  |
| Mammary | Rice  |          |                                      |          |     |  |
| gland   | straw | Negative | cell movement of phagocytes          | 1.34E-04 | 203 |  |
| Mammary | Rice  |          |                                      |          |     |  |
| gland   | straw | Negative | proliferation of dermal cells        | 1.34E-04 | 71  |  |
| Mammary | Rice  |          |                                      |          |     |  |
| gland   | straw | Negative | quantity of T lymphocytes            | 1.36E-04 | 198 |  |
| Mammary | Rice  |          |                                      |          |     |  |
| gland   | straw | Negative | chronic psoriasis                    | 1.38E-04 | 59  |  |
| Mammary | Rice  |          |                                      |          |     |  |
| gland   | straw | Negative | proliferation of tumor cells         | 1.40E-04 | 175 |  |
| Mammary | Rice  |          |                                      |          |     |  |
| gland   | straw | Negative | formation of focal adhesions         | 1.40E-04 | 63  |  |
| Mammary | Rice  |          |                                      |          |     |  |
| gland   | straw | Negative | apoptosis of renal glomerulus        | 1.40E-04 | 27  |  |
| Mammary | Rice  |          |                                      |          |     |  |
| gland   | straw | Negative | targeting of protein                 | 1.42E-04 | 54  |  |
| Mammary | Rice  |          |                                      |          |     |  |
| gland   | straw | Negative | outgrowth of neurons                 | 1.43E-04 | 153 |  |
| Mammary | Rice  |          |                                      |          |     |  |
| gland   | straw | Negative | vascularization                      | 1.45E-04 | 92  |  |
| Mammary | Rice  |          |                                      |          |     |  |
| gland   | straw | Negative | apoptosis of skin                    | 1.45E-04 | 41  |  |
| Mammary | Rice  |          |                                      |          |     |  |
| gland   | straw | Negative | cell death of renal glomerulus       | 1.45E-04 | 28  |  |
| Mammary | Rice  |          |                                      |          |     |  |
| gland   | straw | Negative | skin abnormality                     | 1.47E-04 | 89  |  |
| Mammary | Rice  |          |                                      |          |     |  |
| gland   | straw | Negative | chemotaxis of cells                  | 1.48E-04 | 195 |  |
| Mammary | Rice  |          |                                      |          |     |  |
| gland   | straw | Negative | apoptosis of stem cells              | 1.51E-04 | 32  |  |
| Mammary | Rice  |          |                                      |          |     |  |
| gland   | straw | Negative | angiogenesis of lesion               | 1.55E-04 | 53  |  |
| Mammary | Rice  |          |                                      |          |     |  |
| gland   | straw | Negative | Cytosis                              | 1.55E-04 | 122 |  |
| Mammary | Rice  |          |                                      |          |     |  |
| gland   | straw | Negative | abnormal morphology of genital organ | 1.58E-04 | 153 |  |
| Mammary | Rice  | Negative | prostatic intraepithelial neoplasia  | 1.59E-04 | 50  |  |

|         |       |          |                                      |          |     |
|---------|-------|----------|--------------------------------------|----------|-----|
| gland   | straw |          |                                      |          |     |
| Mammary | Rice  |          |                                      |          |     |
| gland   | straw | Negative | neurodegeneration of brain           | 1.59E-04 | 47  |
| Mammary | Rice  |          |                                      |          |     |
| gland   | straw | Negative | advanced malignant tumor             | 1.61E-04 | 305 |
| Mammary | Rice  |          |                                      |          |     |
| gland   | straw | Negative | proliferation of lymphocytes         | 1.71E-04 | 264 |
| Mammary | Rice  |          |                                      |          |     |
| gland   | straw | Negative | stabilization of filaments           | 1.73E-04 | 46  |
| Mammary | Rice  |          |                                      |          |     |
| gland   | straw | Negative | cell death of heart cells            | 1.73E-04 | 86  |
| Mammary | Rice  |          |                                      |          |     |
| gland   | straw | Negative | mass of adipose tissue               | 1.77E-04 | 75  |
| Mammary | Rice  |          |                                      |          |     |
| gland   | straw | Negative | cell death of dermal cells           | 1.78E-04 | 42  |
| Mammary | Rice  |          |                                      |          |     |
| gland   | straw | Negative | differentiation of epidermal cells   | 1.84E-04 | 66  |
| Mammary | Rice  |          |                                      |          |     |
| gland   | straw | Negative | synthesis of protein                 | 1.84E-04 | 166 |
| Mammary | Rice  |          |                                      |          |     |
| gland   | straw | Negative | craniofacial abnormality             | 1.86E-04 | 134 |
| Mammary | Rice  |          |                                      |          |     |
| gland   | straw | Negative | infection by Retroviridae            | 1.90E-04 | 261 |
| Mammary | Rice  |          |                                      |          |     |
| gland   | straw | Negative | expression of protein                | 1.93E-04 | 128 |
| Mammary | Rice  |          |                                      |          |     |
| gland   | straw | Negative | cell death of carcinoma cell lines   | 1.93E-04 | 109 |
| Mammary | Rice  |          |                                      |          |     |
| gland   | straw | Negative | cell death of liver cells            | 2.01E-04 | 77  |
| Mammary | Rice  |          |                                      |          |     |
| gland   | straw | Negative | abnormal morphology of body wall     | 2.01E-04 | 44  |
| Mammary | Rice  |          |                                      |          |     |
| gland   | straw | Negative | differentiation of endothelial cells | 2.01E-04 | 34  |
| Mammary | Rice  |          |                                      |          |     |
| gland   | straw | Negative | uptake of D-glucose                  | 2.01E-04 | 86  |
| Mammary | Rice  |          |                                      |          |     |
| gland   | straw | Negative | migration of endothelial cells       | 2.03E-04 | 124 |
| Mammary | Rice  |          |                                      |          |     |
| gland   | straw | Negative | differentiation of keratinocytes     | 2.05E-04 | 61  |
| Mammary | Rice  |          |                                      |          |     |
| gland   | straw | Negative | fusion of vesicles                   | 2.06E-04 | 33  |
| Mammary | Rice  |          |                                      |          |     |
| gland   | straw | Negative | development of body axis             | 2.06E-04 | 374 |
| Mammary | Rice  | Negative | proliferation of hepatoma cell lines | 2.11E-04 | 78  |

|         |       |          |                                          |          |     |  |
|---------|-------|----------|------------------------------------------|----------|-----|--|
| gland   | straw |          |                                          |          |     |  |
| Mammary | Rice  |          |                                          |          |     |  |
| gland   | straw | Negative | fusion of cellular membrane              | 2.11E-04 | 28  |  |
| Mammary | Rice  |          |                                          |          |     |  |
| gland   | straw | Negative | juvenile dermatomyositis                 | 2.11E-04 | 28  |  |
| Mammary | Rice  |          |                                          |          |     |  |
| gland   | straw | Negative | abnormal morphology of rib cage          | 2.12E-04 | 39  |  |
| Mammary | Rice  |          |                                          |          |     |  |
| gland   | straw | Negative | apoptosis of dermal cells                | 2.12E-04 | 39  |  |
| Mammary | Rice  |          |                                          |          |     |  |
| gland   | straw | Negative | morphology of lymphatic system component | 2.15E-04 | 155 |  |
| Mammary | Rice  |          |                                          |          |     |  |
| gland   | straw | Negative | cell death of sarcoma cell lines         | 2.17E-04 | 88  |  |
| Mammary | Rice  |          |                                          |          |     |  |
| gland   | straw | Negative | concentration of sterol                  | 2.23E-04 | 116 |  |
| Mammary | Rice  |          |                                          |          |     |  |
| gland   | straw | Negative | chemotaxis                               | 2.24E-04 | 200 |  |
| Mammary | Rice  |          |                                          |          |     |  |
| gland   | straw | Negative | morphology of lung                       | 2.29E-04 | 74  |  |
| Mammary | Rice  |          |                                          |          |     |  |
| gland   | straw | Negative | I-kappaB kinase/NF-kappaB cascade        | 2.29E-04 | 69  |  |
| Mammary | Rice  |          |                                          |          |     |  |
| gland   | straw | Negative | export of molecule                       | 2.32E-04 | 112 |  |
| Mammary | Rice  |          |                                          |          |     |  |
| gland   | straw | Negative | cell viability of fibroblast cell lines  | 2.34E-04 | 48  |  |
| Mammary | Rice  |          |                                          |          |     |  |
| gland   | straw | Negative | abnormal morphology of lung              | 2.38E-04 | 72  |  |
| Mammary | Rice  |          |                                          |          |     |  |
| gland   | straw | Negative | incidence of tumor                       | 2.43E-04 | 121 |  |
| Mammary | Rice  |          |                                          |          |     |  |
| gland   | straw | Negative | quantity of lymphatic system component   | 2.44E-04 | 141 |  |
| Mammary | Rice  |          |                                          |          |     |  |
| gland   | straw | Negative | cell death of heart                      | 2.52E-04 | 88  |  |
| Mammary | Rice  |          |                                          |          |     |  |
| gland   | straw | Negative | apoptosis of muscle                      | 2.52E-04 | 100 |  |
| Mammary | Rice  |          |                                          |          |     |  |
| gland   | straw | Negative | formation of pathological cyst           | 2.54E-04 | 47  |  |
| Mammary | Rice  |          |                                          |          |     |  |
| gland   | straw | Negative | cell death of liver                      | 2.54E-04 | 92  |  |
| Mammary | Rice  |          |                                          |          |     |  |
| gland   | straw | Negative | exocytosis by cells                      | 2.57E-04 | 52  |  |
| Mammary | Rice  |          |                                          |          |     |  |
| gland   | straw | Negative | activation of neuroglia                  | 2.65E-04 | 54  |  |
| Mammary | Rice  | Negative | growth of plasma membrane projections    | 2.67E-04 | 172 |  |

|         |       |          |                                        |          |     |
|---------|-------|----------|----------------------------------------|----------|-----|
| gland   | straw |          |                                        |          |     |
| Mammary | Rice  |          |                                        |          |     |
| gland   | straw | Negative | accumulation of lipid                  | 2.67E-04 | 113 |
| Mammary | Rice  |          |                                        |          |     |
| gland   | straw | Negative | consumption of oxygen                  | 2.68E-04 | 62  |
| Mammary | Rice  |          |                                        |          |     |
| gland   | straw | Negative | Pathological Cyst                      | 2.68E-04 | 56  |
| Mammary | Rice  |          |                                        |          |     |
| gland   | straw | Negative | morphology of pulmonary alveolus       | 2.68E-04 | 49  |
| Mammary | Rice  |          |                                        |          |     |
| gland   | straw | Negative | arrest in proliferation of cells       | 2.69E-04 | 83  |
| Mammary | Rice  |          |                                        |          |     |
| gland   | straw | Negative | morphology of rib                      | 2.79E-04 | 33  |
| Mammary | Rice  |          |                                        |          |     |
| gland   | straw | Negative | cell movement of blood cells           | 2.79E-04 | 313 |
| Mammary | Rice  |          |                                        |          |     |
| gland   | straw | Negative | cell movement of leukocytes            | 2.79E-04 | 276 |
| Mammary | Rice  |          |                                        |          |     |
| gland   | straw | Negative | concentration of cholesterol           | 2.82E-04 | 110 |
| Mammary | Rice  |          |                                        |          |     |
| gland   | straw | Negative | cell death of breast cancer cell lines | 2.86E-04 | 125 |
| Mammary | Rice  |          |                                        |          |     |
| gland   | straw | Negative | production of HIV                      | 2.98E-04 | 27  |
| Mammary | Rice  |          |                                        |          |     |
| gland   | straw | Negative | migration of blood cells               | 3.03E-04 | 312 |
| Mammary | Rice  |          |                                        |          |     |
| gland   | straw | Negative | quantity of protein in blood           | 3.08E-04 | 186 |
| Mammary | Rice  |          |                                        |          |     |
| gland   | straw | Negative | polarization of tumor cell lines       | 3.08E-04 | 21  |
| Mammary | Rice  |          |                                        |          |     |
| gland   | straw | Negative | differentiation of skin                | 3.10E-04 | 71  |
| Mammary | Rice  |          |                                        |          |     |
| gland   | straw | Negative | failure of heart                       | 3.11E-04 | 94  |
| Mammary | Rice  |          |                                        |          |     |
| gland   | straw | Negative | familial Alzheimer's disease           | 3.11E-04 | 16  |
| Mammary | Rice  |          |                                        |          |     |
| gland   | straw | Negative | breast or ovarian cancer               | 3.12E-04 | 659 |
| Mammary | Rice  |          |                                        |          |     |
| gland   | straw | Negative | apoptosis of heart cells               | 3.14E-04 | 74  |
| Mammary | Rice  |          |                                        |          |     |
| gland   | straw | Negative | apoptosis of muscle cells              | 3.15E-04 | 99  |
| Mammary | Rice  |          |                                        |          |     |
| gland   | straw | Negative | proliferation of endothelial cells     | 3.20E-04 | 117 |
| Mammary | Rice  | Negative | necrosis of liver                      | 3.21E-04 | 91  |



|         |       |          |                                            |          |      |  |
|---------|-------|----------|--------------------------------------------|----------|------|--|
| gland   | straw |          |                                            |          |      |  |
| Mammary | Rice  |          |                                            |          |      |  |
| gland   | straw | Negative | apoptosis of antigen presenting cells      | 3.25E-04 | 56   |  |
| Mammary | Rice  |          |                                            |          |      |  |
| gland   | straw | Negative | apoptosis of fibroblasts                   | 3.25E-04 | 84   |  |
| Mammary | Rice  |          |                                            |          |      |  |
| gland   | straw | Negative | neoplasia of tumor cell lines              | 3.29E-04 | 119  |  |
| Mammary | Rice  |          |                                            |          |      |  |
| gland   | straw | Negative | metastasis                                 | 3.30E-04 | 273  |  |
| Mammary | Rice  |          |                                            |          |      |  |
| gland   | straw | Negative | cell death of embryonic cell lines         | 3.31E-04 | 92   |  |
| Mammary | Rice  |          |                                            |          |      |  |
| gland   | straw | Negative | hyperkeratosis                             | 3.33E-04 | 40   |  |
| Mammary | Rice  |          |                                            |          |      |  |
| gland   | straw | Negative | demyelination of central nervous system    | 3.40E-04 | 22   |  |
| Mammary | Rice  |          |                                            |          |      |  |
| gland   | straw | Negative | glandular intraepithelial neoplasm         | 3.42E-04 | 51   |  |
| Mammary | Rice  |          |                                            |          |      |  |
| gland   | straw | Negative | homologous recombination                   | 3.42E-04 | 51   |  |
| Mammary | Rice  |          |                                            |          |      |  |
| gland   | straw | Negative | leukocyte migration                        | 3.43E-04 | 311  |  |
| Mammary | Rice  |          |                                            |          |      |  |
| gland   | straw | Negative | apoptosis of liver                         | 3.44E-04 | 63   |  |
| Mammary | Rice  |          |                                            |          |      |  |
| gland   | straw | Negative | cell death of tumor cells                  | 3.58E-04 | 138  |  |
| Mammary | Rice  |          |                                            |          |      |  |
| gland   | straw | Negative | colon cancer                               | 3.59E-04 | 1246 |  |
| Mammary | Rice  |          |                                            |          |      |  |
| gland   | straw | Negative | quantity of muscle cells                   | 3.60E-04 | 48   |  |
| Mammary | Rice  |          |                                            |          |      |  |
| gland   | straw | Negative | colorectal carcinoma                       | 3.64E-04 | 1247 |  |
| Mammary | Rice  |          |                                            |          |      |  |
| gland   | straw | Negative | infection by lentivirus                    | 3.69E-04 | 257  |  |
| Mammary | Rice  |          |                                            |          |      |  |
| gland   | straw | Negative | cell movement of antigen presenting cells  | 3.73E-04 | 130  |  |
| Mammary | Rice  |          |                                            |          |      |  |
| gland   | straw | Negative | cell death of neuroblastoma cell lines     | 3.87E-04 | 75   |  |
| Mammary | Rice  |          |                                            |          |      |  |
| gland   | straw | Negative | advanced stage peripheral arterial disease | 3.89E-04 | 60   |  |
| Mammary | Rice  |          |                                            |          |      |  |
| gland   | straw | Negative | transport of amino acids                   | 3.91E-04 | 54   |  |
| Mammary | Rice  |          |                                            |          |      |  |
| gland   | straw | Negative | apoptosis of glomerular cells              | 3.91E-04 | 24   |  |
| Mammary | Rice  | Negative | abnormal morphology of pulmonary alveolus  | 3.92E-04 | 47   |  |

|         |       |          |                                               |          |      |  |
|---------|-------|----------|-----------------------------------------------|----------|------|--|
| gland   | straw |          |                                               |          |      |  |
| Mammary | Rice  |          |                                               |          |      |  |
| gland   | straw | Negative | branching of cells                            | 3.93E-04 | 137  |  |
| Mammary | Rice  |          |                                               |          |      |  |
| gland   | straw | Negative | abnormal morphology of rib                    | 3.99E-04 | 31   |  |
| Mammary | Rice  |          |                                               |          |      |  |
| gland   | straw | Negative | HIV infection                                 | 4.00E-04 | 256  |  |
| Mammary | Rice  |          |                                               |          |      |  |
| gland   | straw | Negative | modification of peptide                       | 4.00E-04 | 44   |  |
| Mammary | Rice  |          |                                               |          |      |  |
| gland   | straw | Negative | necrosis of renal glomerulus                  | 4.05E-04 | 25   |  |
| Mammary | Rice  |          |                                               |          |      |  |
| gland   | straw | Negative | angiogenesis of tumor                         | 4.07E-04 | 49   |  |
| Mammary | Rice  |          |                                               |          |      |  |
| gland   | straw | Negative | plasticity of synapse                         | 4.07E-04 | 49   |  |
| Mammary | Rice  |          |                                               |          |      |  |
| gland   | straw | Negative | apoptosis of mesangial cells                  | 4.10E-04 | 15   |  |
| Mammary | Rice  |          |                                               |          |      |  |
| gland   | straw | Negative | formation of eye                              | 4.17E-04 | 161  |  |
| Mammary | Rice  |          |                                               |          |      |  |
| gland   | straw | Negative | proliferation of vascular smooth muscle cells | 4.18E-04 | 61   |  |
| Mammary | Rice  |          |                                               |          |      |  |
| gland   | straw | Negative | migration of fibroblasts                      | 4.29E-04 | 57   |  |
| Mammary | Rice  |          |                                               |          |      |  |
| gland   | straw | Negative | polymerization of protein                     | 4.35E-04 | 137  |  |
| Mammary | Rice  |          |                                               |          |      |  |
| gland   | straw | Negative | differentiation of tumor cell lines           | 4.42E-04 | 140  |  |
| Mammary | Rice  |          |                                               |          |      |  |
| gland   | straw | Negative | repair of DNA                                 | 4.43E-04 | 109  |  |
| Mammary | Rice  |          |                                               |          |      |  |
| gland   | straw | Negative | neoplasia of colon                            | 4.45E-04 | 1248 |  |
| Mammary | Rice  |          |                                               |          |      |  |
| gland   | straw | Negative | growth of neurites                            | 4.53E-04 | 169  |  |
| Mammary | Rice  |          |                                               |          |      |  |
| gland   | straw | Negative | synthesis of nitric oxide                     | 4.53E-04 | 104  |  |
| Mammary | Rice  |          |                                               |          |      |  |
| gland   | straw | Negative | maturation of cells                           | 4.54E-04 | 167  |  |
| Mammary | Rice  |          |                                               |          |      |  |
| gland   | straw | Negative | cell death of epidermal cells                 | 4.55E-04 | 39   |  |
| Mammary | Rice  |          |                                               |          |      |  |
| gland   | straw | Negative | cell death of cardiomyocytes                  | 4.55E-04 | 82   |  |
| Mammary | Rice  |          |                                               |          |      |  |
| gland   | straw | Negative | abnormal morphology of lymph node             | 4.59E-04 | 60   |  |
| Mammary | Rice  | Negative | accumulation of blood cells                   | 4.59E-04 | 105  |  |

|         |        |          |                              |          |      |  |
|---------|--------|----------|------------------------------|----------|------|--|
| gland   | straw  |          |                              |          |      |  |
| Mammary | Corn   |          |                              |          |      |  |
| gland   | stover | Positive | proliferation of cells       | 3.05E-25 | 940  |  |
| Mammary | Corn   |          |                              |          |      |  |
| gland   | stover | Positive | organismal death             | 8.39E-24 | 650  |  |
| Mammary | Corn   |          |                              |          |      |  |
| gland   | stover | Positive | morbidity or mortality       | 2.01E-23 | 655  |  |
| Mammary | Corn   |          |                              |          |      |  |
| gland   | stover | Positive | cell death                   | 7.18E-20 | 836  |  |
| Mammary | Corn   |          |                              |          |      |  |
| gland   | stover | Positive | necrosis                     | 4.16E-19 | 667  |  |
| Mammary | Corn   |          |                              |          |      |  |
| gland   | stover | Positive | morphology of cells          | 1.90E-18 | 525  |  |
| Mammary | Corn   |          |                              |          |      |  |
| gland   | stover | Positive | cell movement                | 9.18E-17 | 558  |  |
| Mammary | Corn   |          |                              |          |      |  |
| gland   | stover | Positive | apoptosis                    | 6.22E-16 | 666  |  |
| Mammary | Corn   |          |                              |          |      |  |
| gland   | stover | Positive | cancer                       | 1.34E-15 | 2309 |  |
| Mammary | Corn   |          |                              |          |      |  |
| gland   | stover | Positive | transport of molecule        | 8.92E-15 | 433  |  |
| Mammary | Corn   |          |                              |          |      |  |
| gland   | stover | Positive | malignant solid tumor        | 2.50E-14 | 2277 |  |
| Mammary | Corn   |          |                              |          |      |  |
| gland   | stover | Positive | organization of cytoplasm    | 9.96E-14 | 410  |  |
| Mammary | Corn   |          |                              |          |      |  |
| gland   | stover | Positive | migration of cells           | 1.43E-13 | 492  |  |
| Mammary | Corn   |          |                              |          |      |  |
| gland   | stover | Positive | Viral Infection              | 6.83E-13 | 424  |  |
| Mammary | Corn   |          |                              |          |      |  |
| gland   | stover | Positive | cellular homeostasis         | 1.41E-12 | 402  |  |
| Mammary | Corn   |          |                              |          |      |  |
| gland   | stover | Positive | angiogenesis                 | 1.45E-12 | 260  |  |
| Mammary | Corn   |          |                              |          |      |  |
| gland   | stover | Positive | development of body trunk    | 5.45E-12 | 307  |  |
| Mammary | Corn   |          |                              |          |      |  |
| gland   | stover | Positive | organization of cytoskeleton | 1.82E-11 | 368  |  |
| Mammary | Corn   |          |                              |          |      |  |
| gland   | stover | Positive | vasculogenesis               | 9.78E-11 | 212  |  |
| Mammary | Corn   |          |                              |          |      |  |
| gland   | stover | Positive | differentiation of cells     | 1.41E-10 | 551  |  |
| Mammary | Corn   |          |                              |          |      |  |
| gland   | stover | Positive | abnormal morphology of cells | 1.66E-10 | 334  |  |
| Mammary | Corn   | Positive | expression of RNA            | 3.59E-10 | 526  |  |

|         |        |          |                                              |          |      |  |
|---------|--------|----------|----------------------------------------------|----------|------|--|
| gland   | stover |          |                                              |          |      |  |
| Mammary | Corn   |          |                                              |          |      |  |
| gland   | stover | Positive | morphology of cardiovascular system          | 3.72E-10 | 181  |  |
| Mammary | Corn   |          |                                              |          |      |  |
| gland   | stover | Positive | formation of cellular protrusions            | 3.72E-10 | 249  |  |
| Mammary | Corn   |          |                                              |          |      |  |
| gland   | stover | Positive | abdominal neoplasm                           | 4.74E-10 | 1878 |  |
| Mammary | Corn   |          |                                              |          |      |  |
| gland   | stover | Positive | perinatal death                              | 1.07E-09 | 173  |  |
| Mammary | Corn   |          |                                              |          |      |  |
| gland   | stover | Positive | abdominal cancer                             | 1.07E-09 | 1855 |  |
| Mammary | Corn   |          |                                              |          |      |  |
| gland   | stover | Positive | tumorigenesis of tissue                      | 1.16E-09 | 1917 |  |
| Mammary | Corn   |          |                                              |          |      |  |
| gland   | stover | Positive | microtubule dynamics                         | 1.19E-09 | 311  |  |
| Mammary | Corn   |          |                                              |          |      |  |
| gland   | stover | Positive | neoplasia of epithelial tissue               | 1.46E-09 | 1887 |  |
| Mammary | Corn   |          |                                              |          |      |  |
| gland   | stover | Positive | cell movement of tumor cell lines            | 1.57E-09 | 234  |  |
| Mammary | Corn   |          |                                              |          |      |  |
| gland   | stover | Positive | cell death of tumor cell lines               | 4.62E-09 | 384  |  |
| Mammary | Corn   |          |                                              |          |      |  |
| gland   | stover | Positive | epithelial cancer                            | 5.13E-09 | 1866 |  |
| Mammary | Corn   |          |                                              |          |      |  |
| gland   | stover | Positive | transcription                                | 6.22E-09 | 485  |  |
| Mammary | Corn   |          |                                              |          |      |  |
| gland   | stover | Positive | abnormal morphology of cardiovascular system | 7.97E-09 | 163  |  |
| Mammary | Corn   |          |                                              |          |      |  |
| gland   | stover | Positive | transcription of RNA                         | 1.03E-08 | 454  |  |
| Mammary | Corn   |          |                                              |          |      |  |
| gland   | stover | Positive | digestive system cancer                      | 1.66E-08 | 1611 |  |
| Mammary | Corn   |          |                                              |          |      |  |
| gland   | stover | Positive | apoptosis of tumor cell lines                | 1.72E-08 | 311  |  |
| Mammary | Corn   |          |                                              |          |      |  |
| gland   | stover | Positive | replication of virus                         | 1.85E-08 | 160  |  |
| Mammary | Corn   |          |                                              |          |      |  |
| gland   | stover | Positive | digestive organ tumor                        | 2.07E-08 | 1624 |  |
| Mammary | Corn   |          |                                              |          |      |  |
| gland   | stover | Positive | size of body                                 | 2.93E-08 | 228  |  |
| Mammary | Corn   |          |                                              |          |      |  |
| gland   | stover | Positive | concentration of lipid                       | 4.20E-08 | 218  |  |
| Mammary | Corn   |          |                                              |          |      |  |
| gland   | stover | Positive | replication of RNA virus                     | 4.58E-08 | 145  |  |
| Mammary | Corn   | Positive | necrosis of epithelial tissue                | 4.68E-08 | 165  |  |

|         |        |          |                                          |          |     |
|---------|--------|----------|------------------------------------------|----------|-----|
| gland   | stover |          |                                          |          |     |
| Mammary | Corn   |          |                                          |          |     |
| gland   | stover | Positive | proliferation of connective tissue cells | 4.68E-08 | 166 |
| Mammary | Corn   |          |                                          |          |     |
| gland   | stover | Positive | quantity of cells                        | 5.10E-08 | 430 |
| Mammary | Corn   |          |                                          |          |     |
| gland   | stover | Positive | autophagy of cells                       | 5.41E-08 | 84  |
| Mammary | Corn   |          |                                          |          |     |
| gland   | stover | Positive | autophagy                                | 5.41E-08 | 112 |
| Mammary | Corn   |          |                                          |          |     |
| gland   | stover | Positive | autosomal recessive disease              | 8.08E-08 | 242 |
| Mammary | Corn   |          |                                          |          |     |
| gland   | stover | Positive | cell death of connective tissue cells    | 9.75E-08 | 167 |
| Mammary | Corn   |          |                                          |          |     |
| gland   | stover | Positive | transactivation                          | 1.01E-07 | 161 |
| Mammary | Corn   |          |                                          |          |     |
| gland   | stover | Positive | development of vasculature               | 1.01E-07 | 122 |
| Mammary | Corn   |          |                                          |          |     |
| gland   | stover | Positive | dyskinesia                               | 1.14E-07 | 170 |
| Mammary | Corn   |          |                                          |          |     |
| gland   | stover | Positive | growth of organism                       | 1.47E-07 | 221 |
| Mammary | Corn   |          |                                          |          |     |
| gland   | stover | Positive | morphology of heart                      | 1.70E-07 | 118 |
| Mammary | Corn   |          |                                          |          |     |
| gland   | stover | Positive | neurological signs                       | 2.16E-07 | 177 |
| Mammary | Corn   |          |                                          |          |     |
| gland   | stover | Positive | Movement Disorders                       | 3.04E-07 | 270 |
| Mammary | Corn   |          |                                          |          |     |
| gland   | stover | Positive | morphology of body cavity                | 4.83E-07 | 299 |
| Mammary | Corn   |          |                                          |          |     |
| gland   | stover | Positive | abnormal morphology of thoracic cavity   | 5.36E-07 | 160 |
| Mammary | Corn   |          |                                          |          |     |
| gland   | stover | Positive | Huntington's Disease                     | 5.76E-07 | 157 |
| Mammary | Corn   |          |                                          |          |     |
| gland   | stover | Positive | cell death of epithelial cells           | 7.12E-07 | 138 |
| Mammary | Corn   |          |                                          |          |     |
| gland   | stover | Positive | Organ Degeneration                       | 7.68E-07 | 137 |
| Mammary | Corn   |          |                                          |          |     |
| gland   | stover | Positive | organization of organelle                | 7.77E-07 | 148 |
| Mammary | Corn   |          |                                          |          |     |
| gland   | stover | Positive | migration of tumor cell lines            | 9.90E-07 | 187 |
| Mammary | Corn   |          |                                          |          |     |
| gland   | stover | Positive | growth of connective tissue              | 1.22E-06 | 172 |
| Mammary | Corn   | Positive | cardiogenesis                            | 1.25E-06 | 131 |

|         |        |          |                                        |          |     |  |
|---------|--------|----------|----------------------------------------|----------|-----|--|
| gland   | stover |          |                                        |          |     |  |
| Mammary | Corn   |          |                                        |          |     |  |
| gland   | stover | Positive | ubiquitination                         | 1.25E-06 | 98  |  |
| Mammary | Corn   |          |                                        |          |     |  |
| gland   | stover | Positive | transactivation of RNA                 | 1.32E-06 | 148 |  |
| Mammary | Corn   |          |                                        |          |     |  |
| gland   | stover | Positive | quantity of connective tissue          | 1.32E-06 | 162 |  |
| Mammary | Corn   |          |                                        |          |     |  |
| gland   | stover | Positive | morphology of nervous system           | 1.38E-06 | 204 |  |
| Mammary | Corn   |          |                                        |          |     |  |
| gland   | stover | Positive | fibrogenesis                           | 1.41E-06 | 116 |  |
| Mammary | Corn   |          |                                        |          |     |  |
| gland   | stover | Positive | seizures                               | 1.42E-06 | 113 |  |
| Mammary | Corn   |          |                                        |          |     |  |
| gland   | stover | Positive | abnormal morphology of body cavity     | 1.63E-06 | 284 |  |
| Mammary | Corn   |          |                                        |          |     |  |
| gland   | stover | Positive | cell death of epithelial cell lines    | 1.66E-06 | 84  |  |
| Mammary | Corn   |          |                                        |          |     |  |
| gland   | stover | Positive | ubiquitination of protein              | 1.94E-06 | 96  |  |
| Mammary | Corn   |          |                                        |          |     |  |
| gland   | stover | Positive | morphology of head                     | 2.13E-06 | 224 |  |
| Mammary | Corn   |          |                                        |          |     |  |
| gland   | stover | Positive | function of cardiovascular system      | 2.28E-06 | 105 |  |
| Mammary | Corn   |          |                                        |          |     |  |
| gland   | stover | Positive | abnormal morphology of nervous system  | 2.58E-06 | 189 |  |
| Mammary | Corn   |          |                                        |          |     |  |
| gland   | stover | Positive | development of cytoplasm               | 2.87E-06 | 127 |  |
| Mammary | Corn   |          |                                        |          |     |  |
| gland   | stover | Positive | protein kinase cascade                 | 3.24E-06 | 117 |  |
| Mammary | Corn   |          |                                        |          |     |  |
| gland   | stover | Positive | abnormal morphology of head            | 3.46E-06 | 213 |  |
| Mammary | Corn   |          |                                        |          |     |  |
| gland   | stover | Positive | transcription of DNA                   | 3.66E-06 | 367 |  |
| Mammary | Corn   |          |                                        |          |     |  |
| gland   | stover | Positive | formation of filaments                 | 3.75E-06 | 111 |  |
| Mammary | Corn   |          |                                        |          |     |  |
| gland   | stover | Positive | behavior                               | 3.77E-06 | 248 |  |
| Mammary | Corn   |          |                                        |          |     |  |
| gland   | stover | Positive | cell viability                         | 3.85E-06 | 316 |  |
| Mammary | Corn   |          |                                        |          |     |  |
| gland   | stover | Positive | invasion of cells                      | 3.93E-06 | 221 |  |
| Mammary | Corn   |          |                                        |          |     |  |
| gland   | stover | Positive | proliferation of fibroblast cell lines | 4.17E-06 | 117 |  |
| Mammary | Corn   | Positive | seizure disorder                       | 4.42E-06 | 128 |  |

|         |        |          |                                            |          |     |
|---------|--------|----------|--------------------------------------------|----------|-----|
| gland   | stover |          |                                            |          |     |
| Mammary | Corn   |          |                                            |          |     |
| gland   | stover | Positive | morphology of heart ventricle              | 4.61E-06 | 60  |
| Mammary | Corn   |          |                                            |          |     |
| gland   | stover | Positive | proliferation of neuronal cells            | 4.61E-06 | 153 |
| Mammary | Corn   |          |                                            |          |     |
| gland   | stover | Positive | abnormal morphology of heart               | 4.82E-06 | 107 |
| Mammary | Corn   |          |                                            |          |     |
| gland   | stover | Positive | cell death of embryonic cell lines         | 4.82E-06 | 72  |
| Mammary | Corn   |          |                                            |          |     |
| gland   | stover | Positive | infection by Retroviridae                  | 5.12E-06 | 186 |
| Mammary | Corn   |          |                                            |          |     |
| gland   | stover | Positive | formation of cytoskeleton                  | 5.55E-06 | 105 |
| Mammary | Corn   |          |                                            |          |     |
| gland   | stover | Positive | metabolism of carbohydrate                 | 5.81E-06 | 163 |
| Mammary | Corn   |          |                                            |          |     |
| gland   | stover | Positive | formation of plasma membrane projections   | 6.62E-06 | 157 |
| Mammary | Corn   |          |                                            |          |     |
| gland   | stover | Positive | development of abdomen                     | 6.75E-06 | 153 |
| Mammary | Corn   |          |                                            |          |     |
| gland   | stover | Positive | proliferation of fibroblasts               | 6.95E-06 | 99  |
| Mammary | Corn   |          |                                            |          |     |
| gland   | stover | Positive | development of digestive system            | 8.65E-06 | 106 |
| Mammary | Corn   |          |                                            |          |     |
| gland   | stover | Positive | long-term potentiation of synapse          | 8.96E-06 | 48  |
| Mammary | Corn   |          |                                            |          |     |
| gland   | stover | Positive | neuronal cell death                        | 9.02E-06 | 176 |
| Mammary | Corn   |          |                                            |          |     |
| gland   | stover | Positive | neuritogenesis                             | 1.00E-05 | 153 |
| Mammary | Corn   |          |                                            |          |     |
| gland   | stover | Positive | infection by lentivirus                    | 1.17E-05 | 183 |
| Mammary | Corn   |          |                                            |          |     |
| gland   | stover | Positive | abnormal morphology of respiratory system  | 1.18E-05 | 87  |
| Mammary | Corn   |          |                                            |          |     |
| gland   | stover | Positive | morphology of respiratory system           | 1.23E-05 | 88  |
| Mammary | Corn   |          |                                            |          |     |
| gland   | stover | Positive | neuromuscular disease                      | 1.23E-05 | 221 |
| Mammary | Corn   |          |                                            |          |     |
| gland   | stover | Positive | branching of cells                         | 1.27E-05 | 102 |
| Mammary | Corn   |          |                                            |          |     |
| gland   | stover | Positive | cell survival                              | 1.34E-05 | 332 |
| Mammary | Corn   |          |                                            |          |     |
| gland   | stover | Positive | abnormal morphology of reproductive system | 1.34E-05 | 135 |
| Mammary | Corn   | Positive | cognition                                  | 1.39E-05 | 122 |

|         |        |          |                                              |          |     |  |
|---------|--------|----------|----------------------------------------------|----------|-----|--|
| gland   | stover |          |                                              |          |     |  |
| Mammary | Corn   |          |                                              |          |     |  |
| gland   | stover | Positive | HIV infection                                | 1.39E-05 | 182 |  |
| Mammary | Corn   |          |                                              |          |     |  |
| gland   | stover | Positive | morphology of reproductive system            | 1.41E-05 | 141 |  |
| Mammary | Corn   |          |                                              |          |     |  |
| gland   | stover | Positive | infection of embryonic cell lines            | 1.48E-05 | 79  |  |
| Mammary | Corn   |          |                                              |          |     |  |
| gland   | stover | Positive | infection of epithelial cell lines           | 1.48E-05 | 79  |  |
| Mammary | Corn   |          |                                              |          |     |  |
| gland   | stover | Positive | development of lymphatic system component    | 1.56E-05 | 87  |  |
| Mammary | Corn   |          |                                              |          |     |  |
| gland   | stover | Positive | cell death of cervical cancer cell lines     | 1.61E-05 | 97  |  |
| Mammary | Corn   |          |                                              |          |     |  |
| gland   | stover | Positive | congenital anomaly of musculoskeletal system | 1.63E-05 | 187 |  |
| Mammary | Corn   |          |                                              |          |     |  |
| gland   | stover | Positive | growth of embryo                             | 1.64E-05 | 127 |  |
| Mammary | Corn   |          |                                              |          |     |  |
| gland   | stover | Positive | synthesis of lipid                           | 1.64E-05 | 182 |  |
| Mammary | Corn   |          |                                              |          |     |  |
| gland   | stover | Positive | abnormal morphology of heart ventricle       | 1.67E-05 | 54  |  |
| Mammary | Corn   |          |                                              |          |     |  |
| gland   | stover | Positive | neonatal death                               | 1.67E-05 | 118 |  |
| Mammary | Corn   |          |                                              |          |     |  |
| gland   | stover | Positive | autophagy of tumor cell lines                | 1.67E-05 | 47  |  |
| Mammary | Corn   |          |                                              |          |     |  |
| gland   | stover | Positive | function of leukocytes                       | 1.69E-05 | 141 |  |
| Mammary | Corn   |          |                                              |          |     |  |
| gland   | stover | Positive | Hypertrophy                                  | 1.71E-05 | 126 |  |
| Mammary | Corn   |          |                                              |          |     |  |
| gland   | stover | Positive | cell death of fibroblast cell lines          | 1.74E-05 | 115 |  |
| Mammary | Corn   |          |                                              |          |     |  |
| gland   | stover | Positive | development of neurons                       | 1.89E-05 | 197 |  |
| Mammary | Corn   |          |                                              |          |     |  |
| gland   | stover | Positive | development of lymphatic system              | 1.91E-05 | 98  |  |
| Mammary | Corn   |          |                                              |          |     |  |
| gland   | stover | Positive | function of blood cells                      | 2.09E-05 | 152 |  |
| Mammary | Corn   |          |                                              |          |     |  |
| gland   | stover | Positive | apoptosis of connective tissue cells         | 2.46E-05 | 83  |  |
| Mammary | Corn   |          |                                              |          |     |  |
| gland   | stover | Positive | learning                                     | 2.71E-05 | 112 |  |
| Mammary | Corn   |          |                                              |          |     |  |
| gland   | stover | Positive | differentiation of muscle cell lines         | 2.83E-05 | 50  |  |
| Mammary | Corn   | Positive | formation of lung                            | 2.87E-05 | 84  |  |



|         |        |          |                                            |          |     |
|---------|--------|----------|--------------------------------------------|----------|-----|
| gland   | stover |          |                                            |          |     |
| Mammary | Corn   |          |                                            |          |     |
| gland   | stover | Positive | apoptosis of neuroblastoma cell lines      | 2.90E-05 | 40  |
| Mammary | Corn   |          |                                            |          |     |
| gland   | stover | Positive | long-term potentiation                     | 3.08E-05 | 70  |
| Mammary | Corn   |          |                                            |          |     |
| gland   | stover | Positive | differentiation of connective tissue cells | 3.20E-05 | 164 |
| Mammary | Corn   |          |                                            |          |     |
| gland   | stover | Positive | proliferation of tumor cell lines          | 3.20E-05 | 362 |
| Mammary | Corn   |          |                                            |          |     |
| gland   | stover | Positive | necrosis of kidney                         | 3.20E-05 | 99  |
| Mammary | Corn   |          |                                            |          |     |
| gland   | stover | Positive | formation of lymphoid organ                | 3.23E-05 | 75  |
| Mammary | Corn   |          |                                            |          |     |
| gland   | stover | Positive | quantity of blood cells                    | 3.24E-05 | 250 |
| Mammary | Corn   |          |                                            |          |     |
| gland   | stover | Positive | abnormal morphology of embryonic tissue    | 3.27E-05 | 142 |
| Mammary | Corn   |          |                                            |          |     |
| gland   | stover | Positive | epileptic seizure                          | 3.76E-05 | 51  |
| Mammary | Corn   |          |                                            |          |     |
| gland   | stover | Positive | apoptosis of fibroblast cell lines         | 3.80E-05 | 90  |
| Mammary | Corn   |          |                                            |          |     |
| gland   | stover | Positive | quantity of leukocytes                     | 3.80E-05 | 225 |
| Mammary | Corn   |          |                                            |          |     |
| gland   | stover | Positive | growth of epithelial tissue                | 3.83E-05 | 172 |
| Mammary | Corn   |          |                                            |          |     |
| gland   | stover | Positive | cell death of kidney cells                 | 3.85E-05 | 95  |
| Mammary | Corn   |          |                                            |          |     |
| gland   | stover | Positive | infection by RNA virus                     | 3.92E-05 | 214 |
| Mammary | Corn   |          |                                            |          |     |
| gland   | stover | Positive | abnormal morphology of internal genitalia  | 4.25E-05 | 95  |
| Mammary | Corn   |          |                                            |          |     |
| gland   | stover | Positive | hypertrophy of heart                       | 4.37E-05 | 92  |
| Mammary | Corn   |          |                                            |          |     |
| gland   | stover | Positive | Growth Failure                             | 4.43E-05 | 153 |
| Mammary | Corn   |          |                                            |          |     |
| gland   | stover | Positive | cell movement of muscle cells              | 4.63E-05 | 54  |
| Mammary | Corn   |          |                                            |          |     |
| gland   | stover | Positive | formation of lymphatic system component    | 4.65E-05 | 81  |
| Mammary | Corn   |          |                                            |          |     |
| gland   | stover | Positive | abnormal morphology of epithelial tissue   | 4.69E-05 | 111 |
| Mammary | Corn   |          |                                            |          |     |
| gland   | stover | Positive | infection of kidney cell lines             | 4.74E-05 | 79  |
| Mammary | Corn   | Positive | necrosis of muscle                         | 4.83E-05 | 93  |

|         |        |          |                                         |          |     |
|---------|--------|----------|-----------------------------------------|----------|-----|
| gland   | stover |          |                                         |          |     |
| Mammary | Corn   |          |                                         |          |     |
| gland   | stover | Positive | apoptosis of heart cells                | 4.91E-05 | 56  |
| Mammary | Corn   |          |                                         |          |     |
| gland   | stover | Positive | cell death of muscle cells              | 5.67E-05 | 91  |
| Mammary | Corn   |          |                                         |          |     |
| gland   | stover | Positive | size of embryo                          | 5.67E-05 | 96  |
| Mammary | Corn   |          |                                         |          |     |
| gland   | stover | Positive | uptake of monosaccharide                | 6.26E-05 | 75  |
| Mammary | Corn   |          |                                         |          |     |
| gland   | stover | Positive | apoptosis of epithelial cell lines      | 6.79E-05 | 64  |
| Mammary | Corn   |          |                                         |          |     |
| gland   | stover | Positive | cell death of kidney cell lines         | 6.85E-05 | 83  |
| Mammary | Corn   |          |                                         |          |     |
| gland   | stover | Positive | dephosphorylation of protein            | 6.85E-05 | 55  |
| Mammary | Corn   |          |                                         |          |     |
| gland   | stover | Positive | infection of cells                      | 6.85E-05 | 197 |
| Mammary | Corn   |          |                                         |          |     |
| gland   | stover | Positive | metabolism of monosaccharide            | 6.96E-05 | 39  |
| Mammary | Corn   |          |                                         |          |     |
| gland   | stover | Positive | morphology of blood vessel              | 7.00E-05 | 78  |
| Mammary | Corn   |          |                                         |          |     |
| gland   | stover | Positive | disorder of basal ganglia               | 7.03E-05 | 190 |
| Mammary | Corn   |          |                                         |          |     |
| gland   | stover | Positive | respiratory system development          | 7.66E-05 | 92  |
| Mammary | Corn   |          |                                         |          |     |
| gland   | stover | Positive | concentration of fatty acid             | 8.44E-05 | 77  |
| Mammary | Corn   |          |                                         |          |     |
| gland   | stover | Positive | abnormal morphology of abdomen          | 8.45E-05 | 214 |
| Mammary | Corn   |          |                                         |          |     |
| gland   | stover | Positive | abnormal morphology of digestive system | 8.45E-05 | 139 |
| Mammary | Corn   |          |                                         |          |     |
| gland   | stover | Positive | morphology of testis                    | 8.57E-05 | 75  |
| Mammary | Corn   |          |                                         |          |     |
| gland   | stover | Positive | attachment of cells                     | 8.68E-05 | 42  |
| Mammary | Corn   |          |                                         |          |     |
| gland   | stover | Positive | Bleeding                                | 9.08E-05 | 111 |
| Mammary | Corn   |          |                                         |          |     |
| gland   | stover | Positive | congenital heart disease                | 9.23E-05 | 60  |
| Mammary | Corn   |          |                                         |          |     |
| gland   | stover | Positive | cell cycle progression                  | 9.23E-05 | 251 |
| Mammary | Corn   |          |                                         |          |     |
| gland   | stover | Positive | limb development                        | 9.56E-05 | 66  |
| Mammary | Corn   | Positive | replication of Influenza virus          | 9.85E-05 | 79  |

|         |        |          |                                         |          |     |  |
|---------|--------|----------|-----------------------------------------|----------|-----|--|
| gland   | stover |          |                                         |          |     |  |
| Mammary | Corn   |          |                                         |          |     |  |
| gland   | stover | Positive | mass of adipose tissue                  | 1.01E-04 | 55  |  |
| Mammary | Corn   |          |                                         |          |     |  |
| gland   | stover | Positive | ruffling                                | 1.05E-04 | 35  |  |
| Mammary | Corn   |          |                                         |          |     |  |
| gland   | stover | Positive | dendritic growth/branching              | 1.06E-04 | 62  |  |
| Mammary | Corn   |          |                                         |          |     |  |
| gland   | stover | Positive | cell death of fibroblasts               | 1.07E-04 | 73  |  |
| Mammary | Corn   |          |                                         |          |     |  |
| gland   | stover | Positive | migration of muscle cells               | 1.07E-04 | 49  |  |
| Mammary | Corn   |          |                                         |          |     |  |
| gland   | stover | Positive | urination disorder                      | 1.07E-04 | 79  |  |
| Mammary | Corn   |          |                                         |          |     |  |
| gland   | stover | Positive | apoptosis of embryonic cell lines       | 1.08E-04 | 53  |  |
| Mammary | Corn   |          |                                         |          |     |  |
| gland   | stover | Positive | cell movement of smooth muscle cells    | 1.09E-04 | 48  |  |
| Mammary | Corn   |          |                                         |          |     |  |
| gland   | stover | Positive | metabolism of membrane lipid derivative | 1.09E-04 | 102 |  |
| Mammary | Corn   |          |                                         |          |     |  |
| gland   | stover | Positive | morphology of connective tissue         | 1.09E-04 | 119 |  |
| Mammary | Corn   |          |                                         |          |     |  |
| gland   | stover | Positive | apoptosis of cervical cancer cell lines | 1.09E-04 | 77  |  |
| Mammary | Corn   |          |                                         |          |     |  |
| gland   | stover | Positive | proliferation of muscle cells           | 1.14E-04 | 98  |  |
| Mammary | Corn   |          |                                         |          |     |  |
| gland   | stover | Positive | cell death of heart                     | 1.17E-04 | 64  |  |
| Mammary | Corn   |          |                                         |          |     |  |
| gland   | stover | Positive | serous neoplasm                         | 1.22E-04 | 153 |  |
| Mammary | Corn   |          |                                         |          |     |  |
| gland   | stover | Positive | cell death of heart cells               | 1.32E-04 | 62  |  |
| Mammary | Corn   |          |                                         |          |     |  |
| gland   | stover | Positive | development of gastrointestinal tract   | 1.41E-04 | 72  |  |
| Mammary | Corn   |          |                                         |          |     |  |
| gland   | stover | Positive | cell movement of fibroblasts            | 1.41E-04 | 53  |  |
| Mammary | Corn   |          |                                         |          |     |  |
| gland   | stover | Positive | morphology of genital organ             | 1.42E-04 | 110 |  |
| Mammary | Corn   |          |                                         |          |     |  |
| gland   | stover | Positive | proteinuria                             | 1.46E-04 | 48  |  |
| Mammary | Corn   |          |                                         |          |     |  |
| gland   | stover | Positive | organization of actin cytoskeleton      | 1.51E-04 | 81  |  |
| Mammary | Corn   |          |                                         |          |     |  |
| gland   | stover | Positive | sprouting                               | 1.51E-04 | 101 |  |
| Mammary | Corn   | Positive | development of head                     | 1.61E-04 | 235 |  |

|         |        |          |                                             |          |     |  |
|---------|--------|----------|---------------------------------------------|----------|-----|--|
| gland   | stover |          |                                             |          |     |  |
| Mammary | Corn   |          |                                             |          |     |  |
| gland   | stover | Positive | small GTPase mediated signal transduction   | 1.61E-04 | 53  |  |
| Mammary | Corn   |          |                                             |          |     |  |
| gland   | stover | Positive | secretion of molecule                       | 1.61E-04 | 139 |  |
| Mammary | Corn   |          |                                             |          |     |  |
| gland   | stover | Positive | apoptosis of kidney cell lines              | 1.64E-04 | 66  |  |
| Mammary | Corn   |          |                                             |          |     |  |
| gland   | stover | Positive | multiple congenital anomalies               | 1.80E-04 | 109 |  |
| Mammary | Corn   |          |                                             |          |     |  |
| gland   | stover | Positive | development of body axis                    | 1.80E-04 | 250 |  |
| Mammary | Corn   |          |                                             |          |     |  |
| gland   | stover | Positive | mass of fat pad                             | 1.80E-04 | 35  |  |
| Mammary | Corn   |          |                                             |          |     |  |
| gland   | stover | Positive | differentiation of connective tissue        | 1.81E-04 | 179 |  |
| Mammary | Corn   |          |                                             |          |     |  |
| gland   | stover | Positive | apoptosis of cardiomyocytes                 | 1.81E-04 | 53  |  |
| Mammary | Corn   |          |                                             |          |     |  |
| gland   | stover | Positive | apoptosis of muscle cells                   | 1.81E-04 | 71  |  |
| Mammary | Corn   |          |                                             |          |     |  |
| gland   | stover | Positive | transport of alpha-amino acid               | 1.81E-04 | 25  |  |
| Mammary | Corn   |          |                                             |          |     |  |
| gland   | stover | Positive | congenital anomaly of digestive system      | 1.83E-04 | 64  |  |
| Mammary | Corn   |          |                                             |          |     |  |
| gland   | stover | Positive | growth of lesion                            | 1.88E-04 | 194 |  |
| Mammary | Corn   |          |                                             |          |     |  |
| gland   | stover | Positive | autosomal dominant disease                  | 1.94E-04 | 158 |  |
| Mammary | Corn   |          |                                             |          |     |  |
| gland   | stover | Positive | morphology of digestive system              | 1.94E-04 | 143 |  |
| Mammary | Corn   |          |                                             |          |     |  |
| gland   | stover | Positive | transport of metal                          | 2.04E-04 | 88  |  |
| Mammary | Corn   |          |                                             |          |     |  |
| gland   | stover | Positive | uptake of D-hexose                          | 2.06E-04 | 62  |  |
| Mammary | Corn   |          |                                             |          |     |  |
| gland   | stover | Positive | midline defect                              | 2.07E-04 | 72  |  |
| Mammary | Corn   |          |                                             |          |     |  |
| gland   | stover | Positive | transport of carbohydrate                   | 2.10E-04 | 55  |  |
| Mammary | Corn   |          |                                             |          |     |  |
| gland   | stover | Positive | migration of smooth muscle cells            | 2.10E-04 | 44  |  |
| Mammary | Corn   |          |                                             |          |     |  |
| gland   | stover | Positive | congenital anomaly of cardiovascular system | 2.15E-04 | 63  |  |
| Mammary | Corn   |          |                                             |          |     |  |
| gland   | stover | Positive | replication of Influenza A virus            | 2.15E-04 | 77  |  |
| Mammary | Corn   | Positive | activation of neuroglia                     | 2.20E-04 | 40  |  |

|         |        |          |                                      |          |     |
|---------|--------|----------|--------------------------------------|----------|-----|
| gland   | stover |          |                                      |          |     |
| Mammary | Corn   |          |                                      |          |     |
| gland   | stover | Positive | transport of cation                  | 2.20E-04 | 104 |
| Mammary | Corn   |          |                                      |          |     |
| gland   | stover | Positive | growth of tumor                      | 2.35E-04 | 193 |
| Mammary | Corn   |          |                                      |          |     |
| gland   | stover | Positive | formation of actin filaments         | 2.36E-04 | 81  |
| Mammary | Corn   |          |                                      |          |     |
| gland   | stover | Positive | development of epithelial tissue     | 2.47E-04 | 130 |
| Mammary | Corn   |          |                                      |          |     |
| gland   | stover | Positive | function of muscle                   | 2.47E-04 | 91  |
| Mammary | Corn   |          |                                      |          |     |
| gland   | stover | Positive | transport of inorganic cation        | 2.49E-04 | 92  |
| Mammary | Corn   |          |                                      |          |     |
| gland   | stover | Positive | hepatic steatosis                    | 2.49E-04 | 72  |
| Mammary | Corn   |          |                                      |          |     |
| gland   | stover | Positive | quantity of cytokine                 | 2.49E-04 | 69  |
| Mammary | Corn   |          |                                      |          |     |
| gland   | stover | Positive | development of cardiovascular tissue | 2.53E-04 | 96  |
| Mammary | Corn   |          |                                      |          |     |
| gland   | stover | Positive | abnormal morphology of genital organ | 2.54E-04 | 105 |
| Mammary | Corn   |          |                                      |          |     |
| gland   | stover | Positive | cognitive impairment                 | 2.54E-04 | 87  |
| Mammary | Corn   |          |                                      |          |     |
| gland   | stover | Positive | infection by HIV-1                   | 2.56E-04 | 151 |
| Mammary | Corn   |          |                                      |          |     |
| gland   | stover | Positive | cell transformation                  | 2.56E-04 | 117 |
| Mammary | Corn   |          |                                      |          |     |
| gland   | stover | Positive | uptake of D-glucose                  | 2.66E-04 | 61  |
| Mammary | Corn   |          |                                      |          |     |
| gland   | stover | Positive | length of cells                      | 2.69E-04 | 32  |
| Mammary | Corn   |          |                                      |          |     |
| gland   | stover | Positive | phosphorylation of protein           | 2.69E-04 | 179 |
| Mammary | Corn   |          |                                      |          |     |
| gland   | stover | Positive | breast or ovarian cancer             | 2.69E-04 | 432 |
| Mammary | Corn   |          |                                      |          |     |
| gland   | stover | Positive | morphology of brain                  | 2.71E-04 | 118 |
| Mammary | Corn   |          |                                      |          |     |
| gland   | stover | Positive | transport of ion                     | 2.84E-04 | 127 |
| Mammary | Corn   |          |                                      |          |     |
| gland   | stover | Positive | formation of thymus gland            | 2.86E-04 | 47  |
| Mammary | Corn   |          |                                      |          |     |
| gland   | stover | Positive | congenital malformation of skeleton  | 2.89E-04 | 108 |
| Mammary | Corn   | Positive | development of connective tissue     | 2.90E-04 | 96  |

|         |        |          |                                          |          |     |  |
|---------|--------|----------|------------------------------------------|----------|-----|--|
| gland   | stover |          |                                          |          |     |  |
| Mammary | Corn   |          |                                          |          |     |  |
| gland   | stover | Positive | cell movement of sarcoma cell lines      | 2.90E-04 | 30  |  |
| Mammary | Corn   |          |                                          |          |     |  |
| gland   | stover | Positive | growth of neurites                       | 2.90E-04 | 117 |  |
| Mammary | Corn   |          |                                          |          |     |  |
| gland   | stover | Positive | formation of muscle                      | 2.90E-04 | 102 |  |
| Mammary | Corn   |          |                                          |          |     |  |
| gland   | stover | Positive | formation of leukocytes                  | 2.90E-04 | 46  |  |
| Mammary | Corn   |          |                                          |          |     |  |
| gland   | stover | Positive | differentiation of muscle                | 2.90E-04 | 80  |  |
| Mammary | Corn   |          |                                          |          |     |  |
| gland   | stover | Positive | proliferation of smooth muscle cells     | 2.93E-04 | 76  |  |
| Mammary | Corn   |          |                                          |          |     |  |
| gland   | stover | Positive | morphology of vessel                     | 2.94E-04 | 81  |  |
| Mammary | Corn   |          |                                          |          |     |  |
| gland   | stover | Positive | invasion of tumor cell lines             | 2.95E-04 | 163 |  |
| Mammary | Corn   |          |                                          |          |     |  |
| gland   | stover | Positive | mass of connective tissue                | 3.05E-04 | 56  |  |
| Mammary | Corn   |          |                                          |          |     |  |
| gland   | stover | Positive | necrosis of cardiac muscle               | 3.05E-04 | 60  |  |
| Mammary | Corn   |          |                                          |          |     |  |
| gland   | stover | Positive | biosynthesis of purine ribonucleotide    | 3.15E-04 | 32  |  |
| Mammary | Corn   |          |                                          |          |     |  |
| gland   | stover | Positive | cell movement of connective tissue cells | 3.21E-04 | 61  |  |
| Mammary | Corn   |          |                                          |          |     |  |
| gland   | stover | Positive | cell death of cardiomyocytes             | 3.24E-04 | 59  |  |
| Mammary | Corn   |          |                                          |          |     |  |
| gland   | stover | Positive | uptake of carbohydrate                   | 3.26E-04 | 77  |  |
| Mammary | Corn   |          |                                          |          |     |  |
| gland   | stover | Positive | differentiation of epithelial tissue     | 3.29E-04 | 93  |  |
| Mammary | Corn   |          |                                          |          |     |  |
| gland   | stover | Positive | abnormal morphology of testis            | 3.31E-04 | 70  |  |
| Mammary | Corn   |          |                                          |          |     |  |
| gland   | stover | Positive | abnormal morphology of blood vessel      | 3.41E-04 | 71  |  |
| Mammary | Corn   |          |                                          |          |     |  |
| gland   | stover | Positive | morphology of lymphatic system component | 3.54E-04 | 106 |  |
| Mammary | Corn   |          |                                          |          |     |  |
| gland   | stover | Positive | morphology of central nervous system     | 3.82E-04 | 128 |  |
| Mammary | Corn   |          |                                          |          |     |  |
| gland   | stover | Positive | metabolism of nucleoside triphosphate    | 3.84E-04 | 41  |  |
| Mammary | Corn   |          |                                          |          |     |  |
| gland   | stover | Positive | biosynthesis of nucleoside triphosphate  | 3.90E-04 | 33  |  |
| Mammary | Corn   | Positive | mass of heart                            | 3.90E-04 | 40  |  |

|         |        |          |                                               |          |     |  |
|---------|--------|----------|-----------------------------------------------|----------|-----|--|
| gland   | stover |          |                                               |          |     |  |
| Mammary | Corn   |          |                                               |          |     |  |
| gland   | stover | Positive | syndromic mental retardation                  | 3.93E-04 | 45  |  |
| Mammary | Corn   |          |                                               |          |     |  |
| gland   | stover | Positive | homing of cells                               | 3.94E-04 | 138 |  |
| Mammary | Corn   |          |                                               |          |     |  |
| gland   | stover | Positive | quantity of carbohydrate                      | 3.97E-04 | 129 |  |
| Mammary | Corn   |          |                                               |          |     |  |
| gland   | stover | Positive | cell viability of pheochromocytoma cell lines | 3.97E-04 | 16  |  |
| Mammary | Corn   |          |                                               |          |     |  |
| gland   | stover | Positive | quantity of epithelial tissue                 | 4.14E-04 | 50  |  |
| Mammary | Corn   |          |                                               |          |     |  |
| gland   | stover | Positive | interphase                                    | 4.15E-04 | 160 |  |
| Mammary | Corn   |          |                                               |          |     |  |
| gland   | stover | Positive | morphogenesis of neurites                     | 4.44E-04 | 106 |  |
| Mammary | Corn   |          |                                               |          |     |  |
| gland   | stover | Positive | cell viability of tumor cell lines            | 4.54E-04 | 187 |  |
| Mammary | Corn   |          |                                               |          |     |  |
| gland   | stover | Positive | endothelial cell development                  | 4.54E-04 | 91  |  |
| Mammary | Corn   |          |                                               |          |     |  |
| gland   | stover | Positive | length of neurons                             | 4.62E-04 | 28  |  |
| Mammary | Corn   |          |                                               |          |     |  |
| gland   | stover | Positive | transport of metal ion                        | 4.68E-04 | 83  |  |
| Mammary | Corn   |          |                                               |          |     |  |
| gland   | stover | Positive | formation of filopodia                        | 4.75E-04 | 47  |  |
| Mammary | Corn   |          |                                               |          |     |  |
| gland   | stover | Positive | benign neoplasia                              | 4.77E-04 | 219 |  |
| Mammary | Corn   |          |                                               |          |     |  |
| gland   | stover | Positive | cell spreading                                | 4.78E-04 | 73  |  |
| Mammary | Corn   |          |                                               |          |     |  |
| gland   | stover | Positive | mental retardation                            | 4.79E-04 | 63  |  |
| Mammary | Corn   |          |                                               |          |     |  |
| gland   | stover | Positive | activation of DNA endogenous promoter         | 4.86E-04 | 280 |  |
| Mammary | Corn   |          |                                               |          |     |  |
| gland   | stover | Positive | development of urinary tract                  | 4.96E-04 | 75  |  |
| Mammary | Corn   |          |                                               |          |     |  |
| gland   | stover | Positive | quantity of protein in blood                  | 5.01E-04 | 126 |  |
| Mammary | Corn   |          |                                               |          |     |  |
| gland   | stover | Positive | homing                                        | 5.03E-04 | 141 |  |
| Mammary | Corn   |          |                                               |          |     |  |
| gland   | stover | Positive | differentiation of muscle cells               | 5.36E-04 | 74  |  |
| Mammary | Corn   |          |                                               |          |     |  |
| gland   | stover | Positive | morphology of lung                            | 5.38E-04 | 52  |  |
| Mammary | Corn   | Positive | MAPKKK cascade                                | 5.39E-04 | 56  |  |

|         |        |          |                                           |          |     |
|---------|--------|----------|-------------------------------------------|----------|-----|
| gland   | stover |          |                                           |          |     |
| Mammary | Corn   |          |                                           |          |     |
| gland   | stover | Positive | morphogenesis of neurons                  | 5.40E-04 | 107 |
| Mammary | Corn   |          |                                           |          |     |
| gland   | stover | Positive | hypertrophy of tissue                     | 5.64E-04 | 68  |
| Mammary | Corn   |          |                                           |          |     |
| gland   | stover | Positive | formation of cardiac muscle               | 5.93E-04 | 29  |
| Mammary | Corn   |          |                                           |          |     |
| gland   | stover | Positive | degeneration of nervous system            | 5.99E-04 | 75  |
| Mammary | Corn   |          |                                           |          |     |
| gland   | stover | Positive | chemotaxis of cells                       | 6.13E-04 | 130 |
| Mammary | Corn   |          |                                           |          |     |
| gland   | stover | Positive | formation of actin stress fibers          | 6.13E-04 | 64  |
| Mammary | Corn   |          |                                           |          |     |
| gland   | stover | Positive | morphology of gonad                       | 6.19E-04 | 96  |
| Mammary | Corn   |          |                                           |          |     |
| gland   | stover | Positive | cell death of neuroblastoma cell lines    | 6.46E-04 | 53  |
| Mammary | Corn   |          |                                           |          |     |
| gland   | stover | Positive | formation of thymocytes                   | 6.46E-04 | 32  |
| Mammary | Corn   |          |                                           |          |     |
| gland   | stover | Positive | development of endothelial tissue         | 6.76E-04 | 93  |
| Mammary | Corn   |          |                                           |          |     |
| gland   | stover | Positive | migration of connective tissue cells      | 6.79E-04 | 50  |
| Mammary | Corn   |          |                                           |          |     |
| gland   | stover | Positive | formation of kidney                       | 6.97E-04 | 73  |
| Mammary | Corn   |          |                                           |          |     |
| gland   | stover | Positive | abnormal morphology of bone               | 7.13E-04 | 109 |
| Mammary | Corn   |          |                                           |          |     |
| gland   | stover | Positive | activation of enzyme                      | 7.19E-04 | 98  |
| Mammary | Corn   |          |                                           |          |     |
| gland   | stover | Positive | morphology of bone                        | 7.40E-04 | 112 |
| Mammary | Corn   |          |                                           |          |     |
| gland   | stover | Positive | differentiation of embryonic tissue       | 7.40E-04 | 67  |
| Mammary | Corn   |          |                                           |          |     |
| gland   | stover | Positive | modification of peptide                   | 7.75E-04 | 32  |
| Mammary | Corn   |          |                                           |          |     |
| gland   | stover | Positive | migration of breast cancer cell lines     | 7.76E-04 | 65  |
| Mammary | Corn   |          |                                           |          |     |
| gland   | stover | Positive | phosphorylation of L-amino acid           | 7.76E-04 | 59  |
| Mammary | Corn   |          |                                           |          |     |
| gland   | stover | Positive | cell movement of breast cancer cell lines | 7.85E-04 | 75  |
| Mammary | Corn   |          |                                           |          |     |
| gland   | stover | Positive | quantity of IL-6 in blood                 | 7.93E-04 | 27  |
| Mammary | Corn   | Positive | abnormal morphology of right ventricle    | 7.94E-04 | 18  |



|         |        |          |                                               |          |     |  |
|---------|--------|----------|-----------------------------------------------|----------|-----|--|
| gland   | stover |          |                                               |          |     |  |
| Mammary | Corn   |          |                                               |          |     |  |
| gland   | stover | Positive | congenital malformation of face               | 8.36E-04 | 43  |  |
| Mammary | Corn   |          |                                               |          |     |  |
| gland   | stover | Positive | quantity of subcutaneous fat                  | 8.58E-04 | 21  |  |
| Mammary | Corn   |          |                                               |          |     |  |
| gland   | stover | Positive | morphology of intercellular junctions         | 8.69E-04 | 29  |  |
| Mammary | Corn   |          |                                               |          |     |  |
| gland   | stover | Positive | chemotaxis                                    | 8.98E-04 | 133 |  |
| Mammary | Corn   |          |                                               |          |     |  |
| gland   | stover | Positive | mitosis                                       | 8.98E-04 | 122 |  |
| Mammary | Corn   |          |                                               |          |     |  |
| gland   | stover | Positive | cell death of hepatoma cell lines             | 8.98E-04 | 47  |  |
| Mammary | Corn   |          |                                               |          |     |  |
| gland   | stover | Positive | development of blood cells                    | 9.14E-04 | 157 |  |
| Mammary | Corn   |          |                                               |          |     |  |
| gland   | stover | Positive | abnormal morphology of gonad                  | 9.19E-04 | 92  |  |
| Mammary | Corn   |          |                                               |          |     |  |
| gland   | stover | Positive | neoplasia of cells                            | 9.23E-04 | 110 |  |
| Mammary | Corn   |          |                                               |          |     |  |
| gland   | stover | Positive | abnormal morphology of central nervous system | 9.35E-04 | 119 |  |
| Mammary | Corn   |          |                                               |          |     |  |
| gland   | stover | Positive | outgrowth of neurites                         | 9.38E-04 | 101 |  |
| Mammary | Corn   |          |                                               |          |     |  |
| gland   | stover | Positive | activation of cells                           | 9.55E-04 | 228 |  |
| Mammary | Corn   |          |                                               |          |     |  |
| gland   | stover | Positive | morphology of left ventricle                  | 9.62E-04 | 27  |  |
| Mammary | Corn   |          |                                               |          |     |  |
| gland   | stover | Positive | quantity of steroid                           | 9.88E-04 | 115 |  |
| Mammary | Corn   |          |                                               |          |     |  |
| gland   | stover | Positive | accumulation of cells                         | 9.93E-04 | 89  |  |
| Mammary | Corn   |          |                                               |          |     |  |
| gland   | stover | Positive | quantity of mononuclear leukocytes            | 1.00E-03 | 175 |  |
| Mammary | Corn   |          |                                               |          |     |  |
| gland   | stover | Positive | apoptosis of fibroblasts                      | 1.02E-03 | 58  |  |
| Mammary | Corn   |          |                                               |          |     |  |
| gland   | stover | Positive | permeability of blood vessel                  | 1.03E-03 | 29  |  |
| Mammary | Corn   |          |                                               |          |     |  |
| gland   | stover | Positive | serine phosphorylation                        | 1.03E-03 | 29  |  |
| Mammary | Corn   |          |                                               |          |     |  |
| gland   | stover | Positive | cell death of pheochromocytoma cell lines     | 1.05E-03 | 35  |  |
| Mammary | Corn   |          |                                               |          |     |  |
| gland   | stover | Positive | morphology of muscle                          | 1.07E-03 | 85  |  |
| Mammary | Corn   | Positive | metabolism of hexose                          | 1.07E-03 | 32  |  |

|         |        |          |                                       |          |     |
|---------|--------|----------|---------------------------------------|----------|-----|
| gland   | stover |          |                                       |          |     |
| Mammary | Corn   |          |                                       |          |     |
| gland   | stover | Positive | quantity of mitochondria              | 1.10E-03 | 17  |
| Mammary | Corn   |          |                                       |          |     |
| gland   | stover | Positive | abnormal morphology of left ventricle | 1.11E-03 | 26  |
| Mammary | Corn   |          |                                       |          |     |
| gland   | stover | Positive | organization of filaments             | 1.11E-03 | 55  |
| Mammary | Corn   |          |                                       |          |     |
| gland   | stover | Positive | abnormal morphology of brain          | 1.12E-03 | 110 |
| Mammary | Corn   |          |                                       |          |     |
| gland   | stover | Positive | proliferation of embryonic cells      | 1.12E-03 | 65  |
| Mammary | Corn   |          |                                       |          |     |
| gland   | stover | Positive | development of striated muscle        | 1.14E-03 | 49  |
| Mammary | Corn   |          |                                       |          |     |
| gland   | stover | Positive | cell movement of endothelial cells    | 1.14E-03 | 89  |
| Mammary | Corn   |          |                                       |          |     |
| gland   | stover | Positive | endocytosis                           | 1.15E-03 | 87  |
| Mammary | Corn   |          |                                       |          |     |
| gland   | stover | Positive | development of leukocytes             | 1.17E-03 | 142 |
| Mammary | Corn   |          |                                       |          |     |
| gland   | stover | Positive | development of mononuclear leukocytes | 1.21E-03 | 135 |
| Mammary | Corn   |          |                                       |          |     |
| gland   | stover | Positive | differentiation of smooth muscle      | 1.22E-03 | 22  |
| Mammary | Corn   |          |                                       |          |     |
| gland   | stover | Positive | abnormal morphology of skeleton       | 1.23E-03 | 70  |
| Mammary | Corn   |          |                                       |          |     |
| gland   | stover | Positive | development of lymphocytes            | 1.23E-03 | 134 |
| Mammary | Corn   |          |                                       |          |     |
| gland   | stover | Positive | abnormal morphology of skull          | 1.23E-03 | 58  |
| Mammary | Corn   |          |                                       |          |     |
| gland   | stover | Positive | invasion of carcinoma cell lines      | 1.24E-03 | 53  |
| Mammary | Corn   |          |                                       |          |     |
| gland   | stover | Positive | metabolism of sphingolipid            | 1.24E-03 | 39  |
| Mammary | Corn   |          |                                       |          |     |
| gland   | stover | Positive | leukocyte migration                   | 1.26E-03 | 204 |
| Mammary | Corn   |          |                                       |          |     |
| gland   | stover | Positive | hypertrophy of cells                  | 1.28E-03 | 74  |
| Mammary | Corn   |          |                                       |          |     |
| gland   | stover | Positive | quantity of lymphocytes               | 1.29E-03 | 168 |
| Mammary | Corn   |          |                                       |          |     |
| gland   | stover | Positive | vascularization of bone               | 1.30E-03 | 7   |
| Mammary | Corn   |          |                                       |          |     |
| gland   | stover | Positive | quantity of cellular protrusions      | 1.30E-03 | 44  |
| Mammary | Corn   | Positive | fertility                             | 1.30E-03 | 91  |

|         |        |          |                                              |          |     |  |
|---------|--------|----------|----------------------------------------------|----------|-----|--|
| gland   | stover |          |                                              |          |     |  |
| Mammary | Corn   |          |                                              |          |     |  |
| gland   | stover | Positive | weight gain                                  | 1.31E-03 | 79  |  |
| Mammary | Corn   |          |                                              |          |     |  |
| gland   | stover | Positive | congenital anomaly of gastrointestinal tract | 1.32E-03 | 46  |  |
| Mammary | Corn   |          |                                              |          |     |  |
| gland   | stover | Positive | function of mononuclear leukocytes           | 1.32E-03 | 86  |  |
| Mammary | Corn   |          |                                              |          |     |  |
| gland   | stover | Positive | synthesis of ceramide                        | 1.32E-03 | 23  |  |
| Mammary | Corn   |          |                                              |          |     |  |
| gland   | stover | Positive | synthesis of nitric oxide                    | 1.33E-03 | 71  |  |
| Mammary | Corn   |          |                                              |          |     |  |
| gland   | stover | Positive | metabolism of glycosphingolipid              | 1.34E-03 | 36  |  |
| Mammary | Corn   |          |                                              |          |     |  |
| gland   | stover | Positive | migration of fibroblasts                     | 1.35E-03 | 40  |  |
| Mammary | Corn   |          |                                              |          |     |  |
| gland   | stover | Positive | craniofacial abnormality                     | 1.41E-03 | 89  |  |
| Mammary | Corn   |          |                                              |          |     |  |
| gland   | stover | Positive | apoptosis of hepatoma cell lines             | 1.42E-03 | 42  |  |
| Mammary | Corn   |          |                                              |          |     |  |
| gland   | stover | Positive | mass of organism                             | 1.42E-03 | 84  |  |
| Mammary | Corn   |          |                                              |          |     |  |
| gland   | stover | Positive | cell movement of fibrosarcoma cell lines     | 1.43E-03 | 17  |  |
| Mammary | Corn   |          |                                              |          |     |  |
| gland   | stover | Positive | function of endothelial cells                | 1.43E-03 | 17  |  |
| Mammary | Corn   |          |                                              |          |     |  |
| gland   | stover | Positive | damage of epithelial tissue                  | 1.44E-03 | 31  |  |
| Mammary | Corn   |          |                                              |          |     |  |
| gland   | stover | Positive | branching of neurites                        | 1.44E-03 | 71  |  |
| Mammary | Corn   |          |                                              |          |     |  |
| gland   | stover | Positive | apoptosis of neurons                         | 1.46E-03 | 107 |  |
| Mammary | Corn   |          |                                              |          |     |  |
| gland   | stover | Positive | branching of neurons                         | 1.47E-03 | 73  |  |
| Mammary | Corn   |          |                                              |          |     |  |
| gland   | stover | Positive | muscular hypertrophy                         | 1.59E-03 | 54  |  |
| Mammary | Corn   |          |                                              |          |     |  |
| gland   | stover | Positive | serine phosphorylation of peptide            | 1.59E-03 | 26  |  |
| Mammary | Corn   |          |                                              |          |     |  |
| gland   | stover | Positive | abnormal morphology of epiblast              | 1.60E-03 | 10  |  |
| Mammary | Corn   |          |                                              |          |     |  |
| gland   | stover | Positive | cell death of brain                          | 1.62E-03 | 74  |  |
| Mammary | Corn   |          |                                              |          |     |  |
| gland   | stover | Positive | stage 2-3 breast cancer                      | 1.63E-03 | 23  |  |
| Mammary | Corn   | Positive | morphology of right ventricle                | 1.63E-03 | 19  |  |

|         |        |          |                                             |          |     |  |
|---------|--------|----------|---------------------------------------------|----------|-----|--|
| gland   | stover |          |                                             |          |     |  |
| Mammary | Corn   |          |                                             |          |     |  |
| gland   | stover | Positive | size of animal                              | 1.66E-03 | 48  |  |
| Mammary | Corn   |          |                                             |          |     |  |
| gland   | stover | Positive | cellularity                                 | 1.68E-03 | 21  |  |
| Mammary | Corn   |          |                                             |          |     |  |
| gland   | stover | Positive | transport of L-amino acid                   | 1.68E-03 | 21  |  |
| Mammary | Corn   |          |                                             |          |     |  |
| gland   | stover | Positive | apoptosis of embryonic cells                | 1.68E-03 | 29  |  |
| Mammary | Corn   |          |                                             |          |     |  |
| gland   | stover | Positive | antiviral response of fibroblast cell lines | 1.70E-03 | 8   |  |
| Mammary | Corn   |          |                                             |          |     |  |
| gland   | stover | Positive | estrous cycle                               | 1.74E-03 | 24  |  |
| Mammary | Corn   |          |                                             |          |     |  |
| gland   | stover | Positive | concentration of phospholipid               | 1.74E-03 | 49  |  |
| Mammary | Corn   |          |                                             |          |     |  |
| gland   | stover | Positive | morphology of vertebral column              | 1.74E-03 | 40  |  |
| Mammary | Corn   |          |                                             |          |     |  |
| gland   | stover | Positive | function of lymphocytes                     | 1.77E-03 | 85  |  |
| Mammary | Corn   |          |                                             |          |     |  |
| gland   | stover | Positive | accumulation of sterol                      | 1.86E-03 | 22  |  |
| Mammary | Corn   |          |                                             |          |     |  |
| gland   | stover | Positive | morphology of skeleton                      | 1.87E-03 | 71  |  |
| Mammary | Corn   |          |                                             |          |     |  |
| gland   | stover | Positive | formation of pulmonary alveolus             | 1.88E-03 | 20  |  |
| Mammary | Corn   |          |                                             |          |     |  |
| gland   | stover | Positive | morphology of limb                          | 1.88E-03 | 60  |  |
| Mammary | Corn   |          |                                             |          |     |  |
| gland   | stover | Positive | colony formation of cells                   | 1.88E-03 | 119 |  |
| Mammary | Corn   |          |                                             |          |     |  |
| gland   | stover | Positive | abnormal morphology of enlarged heart       | 1.89E-03 | 26  |  |
| Mammary | Corn   |          |                                             |          |     |  |
| gland   | stover | Positive | morphology of fibroblast cell lines         | 1.89E-03 | 26  |  |
| Mammary | Corn   |          |                                             |          |     |  |
| gland   | stover | Positive | growth of lymphatic system component        | 1.90E-03 | 51  |  |
| Mammary | Corn   |          |                                             |          |     |  |
| gland   | stover | Positive | cell viability of lung cancer cell lines    | 1.90E-03 | 33  |  |
| Mammary | Corn   |          |                                             |          |     |  |
| gland   | stover | Positive | metabolism of D-glucose                     | 1.93E-03 | 27  |  |
| Mammary | Corn   |          |                                             |          |     |  |
| gland   | stover | Positive | function of vascular endothelial cells      | 2.01E-03 | 14  |  |
| Mammary | Corn   |          |                                             |          |     |  |
| gland   | stover | Positive | differentiation of embryonic cells          | 2.02E-03 | 59  |  |
| Mammary | Corn   | Positive | fatty acid metabolism                       | 2.02E-03 | 143 |  |

|         |        |          |                                               |          |     |  |
|---------|--------|----------|-----------------------------------------------|----------|-----|--|
| gland   | stover |          |                                               |          |     |  |
| Mammary | Corn   |          |                                               |          |     |  |
| gland   | stover | Positive | shape change of neurites                      | 2.02E-03 | 72  |  |
| Mammary | Corn   |          |                                               |          |     |  |
| gland   | stover | Positive | proliferation of vascular smooth muscle cells | 2.03E-03 | 42  |  |
| Mammary | Corn   |          |                                               |          |     |  |
| gland   | stover | Positive | gonadal tumor                                 | 2.07E-03 | 191 |  |
| Mammary | Corn   |          |                                               |          |     |  |
| gland   | stover | Positive | cell viability of muscle cells                | 2.08E-03 | 21  |  |
| Mammary | Corn   |          |                                               |          |     |  |
| gland   | stover | Positive | release of L-amino acid                       | 2.21E-03 | 25  |  |
| Mammary | Corn   |          |                                               |          |     |  |
| gland   | stover | Positive | apoptosis of epithelial cells                 | 2.21E-03 | 72  |  |
| Mammary | Corn   |          |                                               |          |     |  |
| gland   | stover | Positive | cell death of embryonic cells                 | 2.21E-03 | 33  |  |
| Mammary | Corn   |          |                                               |          |     |  |
| gland   | stover | Positive | formation of T lymphocytes                    | 2.21E-03 | 33  |  |
| Mammary | Corn   |          |                                               |          |     |  |
| gland   | stover | Positive | epilepsy                                      | 2.24E-03 | 77  |  |
| Mammary | Corn   |          |                                               |          |     |  |
| gland   | stover | Positive | migration of macrophages                      | 2.31E-03 | 27  |  |
| Mammary | Corn   |          |                                               |          |     |  |
| gland   | stover | Positive | congenital anomaly of mouth                   | 2.33E-03 | 44  |  |
| Mammary | Corn   |          |                                               |          |     |  |
| gland   | stover | Positive | glandular intraepithelial neoplasm            | 2.43E-03 | 35  |  |
| Mammary | Corn   |          |                                               |          |     |  |
| gland   | stover | Positive | neoplasia of tumor cell lines                 | 2.43E-03 | 79  |  |
| Mammary | Corn   |          |                                               |          |     |  |
| gland   | stover | Positive | abnormal morphology of limb                   | 2.44E-03 | 59  |  |
| Mammary | Corn   |          |                                               |          |     |  |
| gland   | stover | Positive | survival of organism                          | 2.44E-03 | 165 |  |
| Mammary | Corn   |          |                                               |          |     |  |
| gland   | stover | Positive | quantity of reactive oxygen species           | 2.44E-03 | 47  |  |
| Mammary | Corn   |          |                                               |          |     |  |
| gland   | stover | Positive | Lymphocyte homeostasis                        | 2.56E-03 | 130 |  |
| Mammary | Corn   |          |                                               |          |     |  |
| gland   | stover | Positive | Edema                                         | 2.56E-03 | 85  |  |
| Mammary | Corn   |          |                                               |          |     |  |
| gland   | stover | Positive | degranulation of mast cells                   | 2.57E-03 | 37  |  |
| Mammary | Corn   |          |                                               |          |     |  |
| gland   | stover | Positive | long-term memory                              | 2.60E-03 | 21  |  |
| Mammary | Corn   |          |                                               |          |     |  |
| gland   | stover | Positive | bleeding of tissue                            | 2.64E-03 | 19  |  |
| Mammary | Corn   | Positive | proliferation of blood cells                  | 2.66E-03 | 195 |  |

|         |        |          |                                            |          |     |
|---------|--------|----------|--------------------------------------------|----------|-----|
| gland   | stover |          |                                            |          |     |
| Mammary | Corn   |          |                                            |          |     |
| gland   | stover | Positive | mammary tumor                              | 2.67E-03 | 364 |
| Mammary | Corn   |          |                                            |          |     |
| gland   | stover | Positive | function of T lymphocytes                  | 2.71E-03 | 66  |
| Mammary | Corn   |          |                                            |          |     |
| gland   | stover | Positive | activation of microglia                    | 2.72E-03 | 30  |
| Mammary | Corn   |          |                                            |          |     |
| gland   | stover | Positive | homeostasis of leukocytes                  | 2.72E-03 | 132 |
| Mammary | Corn   |          |                                            |          |     |
| gland   | stover | Positive | metabolism of glycolipid                   | 2.73E-03 | 41  |
| Mammary | Corn   |          |                                            |          |     |
| gland   | stover | Positive | apoptosis of pheochromocytoma cell lines   | 2.73E-03 | 27  |
| Mammary | Corn   |          |                                            |          |     |
| gland   | stover | Positive | release of amino acids                     | 2.74E-03 | 28  |
| Mammary | Corn   |          |                                            |          |     |
| gland   | stover | Positive | Thrombosis                                 | 2.74E-03 | 45  |
| Mammary | Corn   |          |                                            |          |     |
| gland   | stover | Positive | formation of cells                         | 2.76E-03 | 225 |
| Mammary | Corn   |          |                                            |          |     |
| gland   | stover | Positive | TNM stage III breast cancer                | 2.77E-03 | 22  |
| Mammary | Corn   |          |                                            |          |     |
| gland   | stover | Positive | synthesis of nucleotide                    | 2.82E-03 | 89  |
| Mammary | Corn   |          |                                            |          |     |
| gland   | stover | Positive | abnormal morphology of lung                | 2.82E-03 | 48  |
| Mammary | Corn   |          |                                            |          |     |
| gland   | stover | Positive | invasion of tissue                         | 2.85E-03 | 51  |
| Mammary | Corn   |          |                                            |          |     |
| gland   | stover | Positive | size of cells                              | 2.85E-03 | 104 |
| Mammary | Corn   |          |                                            |          |     |
| gland   | stover | Positive | dyspnea                                    | 2.89E-03 | 37  |
| Mammary | Corn   |          | autosomal dominant Emery-Dreifuss muscular |          |     |
| gland   | stover | Positive | dystrophy                                  | 2.90E-03 | 20  |
| Mammary | Corn   |          |                                            |          |     |
| gland   | stover | Positive | proliferation of neural stem cells         | 2.90E-03 | 20  |
| Mammary | Corn   |          |                                            |          |     |
| gland   | stover | Positive | dysplasia                                  | 2.90E-03 | 55  |
| Mammary | Corn   |          |                                            |          |     |
| gland   | stover | Positive | cell viability of carcinoma cell lines     | 2.99E-03 | 39  |
| Mammary | Corn   |          |                                            |          |     |
| gland   | stover | Positive | neurotransmission                          | 3.02E-03 | 100 |
| Mammary | Corn   |          |                                            |          |     |
| gland   | stover | Positive | abnormal morphology of embryoblast         | 3.18E-03 | 17  |
| Mammary | Corn   | Positive | Ovarian Cancer and Tumors                  | 3.18E-03 | 176 |

|         |        |          |                                         |          |     |
|---------|--------|----------|-----------------------------------------|----------|-----|
| gland   | stover |          |                                         |          |     |
| Mammary | Corn   |          |                                         |          |     |
| gland   | stover | Positive | morphology of mitochondria              | 3.18E-03 | 29  |
| Mammary | Corn   |          |                                         |          |     |
| gland   | stover | Positive | synthesis of glycosphingolipid          | 3.18E-03 | 29  |
| Mammary | Corn   |          |                                         |          |     |
| gland   | stover | Positive | binding of DNA                          | 3.18E-03 | 124 |
| Mammary | Corn   |          |                                         |          |     |
| gland   | stover | Positive | synthesis of ATP                        | 3.20E-03 | 27  |
| Mammary | Corn   |          |                                         |          |     |
| gland   | stover | Positive | proliferation of endothelial cells      | 3.24E-03 | 77  |
| Mammary | Corn   |          |                                         |          |     |
| gland   | stover | Positive | migration of mesenchymal stem cells     | 3.24E-03 | 11  |
| Mammary | Corn   |          |                                         |          |     |
| gland   | stover | Positive | development of genitourinary system     | 3.25E-03 | 204 |
| Mammary | Corn   |          |                                         |          |     |
| gland   | stover | Positive | abnormal morphology of vertebrae        | 3.27E-03 | 37  |
| Mammary | Corn   |          |                                         |          |     |
| gland   | stover | Positive | morphology of pulmonary alveolus        | 3.36E-03 | 33  |
| Mammary | Corn   |          |                                         |          |     |
| gland   | stover | Positive | cartilage development                   | 3.37E-03 | 39  |
| Mammary | Corn   |          |                                         |          |     |
| gland   | stover | Positive | morphology of lymphoid organ            | 3.44E-03 | 95  |
| Mammary | Corn   |          |                                         |          |     |
| gland   | stover | Positive | transmembrane potential of mitochondria | 3.52E-03 | 55  |
| Mammary | Corn   |          |                                         |          |     |
| gland   | stover | Positive | migration of sarcoma cell lines         | 3.54E-03 | 23  |
| Mammary | Corn   |          |                                         |          |     |
| gland   | stover | Positive | abnormal morphology of vertebral column | 3.55E-03 | 38  |
| Mammary | Corn   |          |                                         |          |     |
| gland   | stover | Positive | differentiation of tumor cell lines     | 3.57E-03 | 92  |
| Mammary | Corn   |          |                                         |          |     |
| gland   | stover | Positive | proliferation of immune cells           | 3.59E-03 | 183 |
| Mammary | Corn   |          |                                         |          |     |
| gland   | stover | Positive | shape change of kidney cell lines       | 3.60E-03 | 20  |
| Mammary | Corn   |          |                                         |          |     |
| gland   | stover | Positive | function of blood vessel                | 3.65E-03 | 18  |
| Mammary | Corn   |          |                                         |          |     |
| gland   | stover | Positive | neurogenesis of brain                   | 3.65E-03 | 18  |
| Mammary | Corn   |          |                                         |          |     |
| gland   | stover | Positive | concentration of acylglycerol           | 3.65E-03 | 82  |
| Mammary | Corn   |          |                                         |          |     |
| gland   | stover | Positive | colony formation                        | 3.69E-03 | 127 |
| Mammary | Corn   | Positive | morphology of uterus                    | 3.75E-03 | 27  |

|         |        |          |                                            |          |     |  |
|---------|--------|----------|--------------------------------------------|----------|-----|--|
| gland   | stover |          |                                            |          |     |  |
| Mammary | Corn   |          |                                            |          |     |  |
| gland   | stover | Positive | cell death of brain cells                  | 3.75E-03 | 68  |  |
| Mammary | Corn   |          |                                            |          |     |  |
| gland   | stover | Positive | export of molecule                         | 3.78E-03 | 73  |  |
| Mammary | Corn   |          |                                            |          |     |  |
| gland   | stover | Positive | development of sensory organ               | 3.78E-03 | 133 |  |
| Mammary | Corn   |          |                                            |          |     |  |
| gland   | stover | Positive | outgrowth of cells                         | 3.85E-03 | 104 |  |
| Mammary | Corn   |          |                                            |          |     |  |
| gland   | stover | Positive | differentiation of bone cells              | 4.00E-03 | 98  |  |
| Mammary | Corn   |          |                                            |          |     |  |
| gland   | stover | Positive | activation of astrocytes                   | 4.06E-03 | 17  |  |
| Mammary | Corn   |          |                                            |          |     |  |
| gland   | stover | Positive | transport of monosaccharide                | 4.06E-03 | 42  |  |
| Mammary | Corn   |          |                                            |          |     |  |
| gland   | stover | Positive | cell death of cerebral cortex cells        | 4.06E-03 | 58  |  |
| Mammary | Corn   |          |                                            |          |     |  |
| gland   | stover | Positive | fusion of cellular membrane                | 4.06E-03 | 19  |  |
| Mammary | Corn   |          |                                            |          |     |  |
| gland   | stover | Positive | juvenile dermatomyositis                   | 4.06E-03 | 19  |  |
| Mammary | Corn   |          |                                            |          |     |  |
| gland   | stover | Positive | differentiation of osteoblasts             | 4.06E-03 | 69  |  |
| Mammary | Corn   |          |                                            |          |     |  |
| gland   | stover | Positive | tumorigenesis of gonad                     | 4.07E-03 | 186 |  |
| Mammary | Corn   |          |                                            |          |     |  |
| gland   | stover | Positive | cell movement of leukocytes                | 4.18E-03 | 177 |  |
| Mammary | Corn   |          |                                            |          |     |  |
| gland   | stover | Positive | Shock Response                             | 4.18E-03 | 45  |  |
| Mammary | Corn   |          |                                            |          |     |  |
| gland   | stover | Positive | transport of monovalent inorganic cation   | 4.19E-03 | 55  |  |
| Mammary | Corn   |          |                                            |          |     |  |
| gland   | stover | Positive | localization of protein                    | 4.22E-03 | 48  |  |
| Mammary | Corn   |          |                                            |          |     |  |
| gland   | stover | Positive | activation of Protein kinase               | 4.28E-03 | 63  |  |
| Mammary | Corn   |          |                                            |          |     |  |
| gland   | stover | Positive | death of perinatal stage organism          | 4.32E-03 | 24  |  |
| Mammary | Corn   |          |                                            |          |     |  |
| gland   | stover | Positive | quantity of glycosphingolipid              | 4.33E-03 | 28  |  |
| Mammary | Corn   |          |                                            |          |     |  |
| gland   | stover | Positive | oral squamous cell carcinoma               | 4.33E-03 | 46  |  |
| Mammary | Corn   |          |                                            |          |     |  |
| gland   | stover | Positive | cancer of secretory structure              | 4.33E-03 | 430 |  |
| Mammary | Corn   | Positive | cell death of central nervous system cells | 4.37E-03 | 72  |  |



|         |        |          |                                        |          |      |  |
|---------|--------|----------|----------------------------------------|----------|------|--|
| gland   | stover |          |                                        |          |      |  |
| Mammary | Corn   |          |                                        |          |      |  |
| gland   | stover | Positive | fragmentation of mitochondria          | 4.37E-03 | 16   |  |
| Mammary | Corn   |          |                                        |          |      |  |
| gland   | stover | Positive | metabolism of protein                  | 4.46E-03 | 221  |  |
| Mammary | Corn   |          |                                        |          |      |  |
| gland   | stover | Positive | cell movement of epithelial cell lines | 4.53E-03 | 32   |  |
| Mammary | Corn   |          |                                        |          |      |  |
| gland   | stover | Positive | migration of endothelial cells         | 4.54E-03 | 80   |  |
| Mammary | Corn   |          |                                        |          |      |  |
| gland   | stover | Positive | metabolism of peptide                  | 4.67E-03 | 48   |  |
| Mammary | Corn   |          |                                        |          |      |  |
| gland   | stover | Positive | concentration of sterol                | 4.68E-03 | 75   |  |
| Mammary | Corn   |          |                                        |          |      |  |
| gland   | stover | Positive | stress response of cells               | 4.72E-03 | 37   |  |
| Mammary | Corn   |          |                                        |          |      |  |
| gland   | stover | Positive | growth of embryonic tissue             | 4.72E-03 | 68   |  |
| Mammary | Corn   |          |                                        |          |      |  |
| gland   | stover | Positive | migration of fibrosarcoma cell lines   | 4.72E-03 | 15   |  |
| Mammary | Corn   |          |                                        |          |      |  |
| gland   | stover | Positive | differentiation of leukocytes          | 4.74E-03 | 156  |  |
| Mammary | Corn   |          |                                        |          |      |  |
| gland   | stover | Positive | myopathy of heart                      | 4.74E-03 | 11   |  |
| Mammary | Corn   |          |                                        |          |      |  |
| gland   | stover | Positive | familial cardiovascular disease        | 4.78E-03 | 46   |  |
| Mammary | Corn   |          |                                        |          |      |  |
| gland   | stover | Positive | cell movement of embryonic cell lines  | 4.78E-03 | 30   |  |
| Mammary | Corn   |          |                                        |          |      |  |
| gland   | stover | Positive | cell death of breast cancer cell lines | 4.80E-03 | 81   |  |
| Mammary | Corn   |          |                                        |          |      |  |
| gland   | stover | Positive | development of tumor cell lines        | 4.84E-03 | 22   |  |
| Mammary | Corn   |          |                                        |          |      |  |
| gland   | stover | Positive | length of neurites                     | 4.84E-03 | 22   |  |
| Mammary | Corn   |          |                                        |          |      |  |
| gland   | stover | Negative | malignant solid tumor                  | 9.26E-53 | 4810 |  |
| Mammary | Corn   |          |                                        |          |      |  |
| gland   | stover | Negative | cancer                                 | 1.28E-52 | 4860 |  |
| Mammary | Corn   |          |                                        |          |      |  |
| gland   | stover | Negative | proliferation of cells                 | 2.26E-50 | 1888 |  |
| Mammary | Corn   |          |                                        |          |      |  |
| gland   | stover | Negative | cell death                             | 4.65E-50 | 1729 |  |
| Mammary | Corn   |          |                                        |          |      |  |
| gland   | stover | Negative | apoptosis                              | 8.51E-43 | 1388 |  |
| Mammary | Corn   | Negative | morbidity or mortality                 | 4.85E-42 | 1287 |  |

|         |        |          |                                |          |      |  |
|---------|--------|----------|--------------------------------|----------|------|--|
| gland   | stover |          |                                |          |      |  |
| Mammary | Corn   |          |                                |          |      |  |
| gland   | stover | Negative | organismal death               | 1.40E-41 | 1270 |  |
| Mammary | Corn   |          |                                |          |      |  |
| gland   | stover | Negative | necrosis                       | 3.08E-38 | 1336 |  |
| Mammary | Corn   |          |                                |          |      |  |
| gland   | stover | Negative | neoplasia of epithelial tissue | 5.38E-34 | 3986 |  |
| Mammary | Corn   |          |                                |          |      |  |
| gland   | stover | Negative | tumorigenesis of tissue        | 1.83E-33 | 4043 |  |
| Mammary | Corn   |          |                                |          |      |  |
| gland   | stover | Negative | organization of cytoplasm      | 3.00E-33 | 839  |  |
| Mammary | Corn   |          |                                |          |      |  |
| gland   | stover | Negative | morphology of cells            | 5.74E-33 | 1029 |  |
| Mammary | Corn   |          |                                |          |      |  |
| gland   | stover | Negative | abdominal neoplasm             | 9.09E-33 | 3951 |  |
| Mammary | Corn   |          |                                |          |      |  |
| gland   | stover | Negative | epithelial cancer              | 3.00E-32 | 3941 |  |
| Mammary | Corn   |          |                                |          |      |  |
| gland   | stover | Negative | abdominal cancer               | 3.59E-30 | 3894 |  |
| Mammary | Corn   |          |                                |          |      |  |
| gland   | stover | Negative | organization of cytoskeleton   | 2.78E-29 | 759  |  |
| Mammary | Corn   |          |                                |          |      |  |
| gland   | stover | Negative | cell movement                  | 5.35E-29 | 1094 |  |
| Mammary | Corn   |          |                                |          |      |  |
| gland   | stover | Negative | migration of cells             | 7.90E-26 | 978  |  |
| Mammary | Corn   |          |                                |          |      |  |
| gland   | stover | Negative | expression of RNA              | 2.81E-24 | 1080 |  |
| Mammary | Corn   |          |                                |          |      |  |
| gland   | stover | Negative | transport of molecule          | 3.52E-24 | 838  |  |
| Mammary | Corn   |          |                                |          |      |  |
| gland   | stover | Negative | cell survival                  | 3.98E-24 | 737  |  |
| Mammary | Corn   |          |                                |          |      |  |
| gland   | stover | Negative | cell death of tumor cell lines | 7.46E-24 | 797  |  |
| Mammary | Corn   |          |                                |          |      |  |
| gland   | stover | Negative | cellular homeostasis           | 7.46E-24 | 795  |  |
| Mammary | Corn   |          |                                |          |      |  |
| gland   | stover | Negative | quantity of cells              | 3.84E-23 | 904  |  |
| Mammary | Corn   |          |                                |          |      |  |
| gland   | stover | Negative | Movement Disorders             | 1.24E-22 | 575  |  |
| Mammary | Corn   |          |                                |          |      |  |
| gland   | stover | Negative | transcription                  | 2.22E-22 | 1002 |  |
| Mammary | Corn   |          |                                |          |      |  |
| gland   | stover | Negative | differentiation of cells       | 3.28E-22 | 1115 |  |
| Mammary | Corn   | Negative | apoptosis of tumor cell lines  | 3.85E-22 | 644  |  |

|         |        |          |                                       |          |      |  |
|---------|--------|----------|---------------------------------------|----------|------|--|
| gland   | stover |          |                                       |          |      |  |
| Mammary | Corn   |          |                                       |          |      |  |
| gland   | stover | Negative | microtubule dynamics                  | 4.26E-22 | 631  |  |
| Mammary | Corn   |          |                                       |          |      |  |
| gland   | stover | Negative | cell viability                        | 4.28E-22 | 685  |  |
| Mammary | Corn   |          |                                       |          |      |  |
| gland   | stover | Negative | Viral Infection                       | 4.28E-22 | 828  |  |
| Mammary | Corn   |          |                                       |          |      |  |
| gland   | stover | Negative | transcription of RNA                  | 2.28E-21 | 935  |  |
| Mammary | Corn   |          |                                       |          |      |  |
| gland   | stover | Negative | proliferation of tumor cell lines     | 4.29E-21 | 794  |  |
| Mammary | Corn   |          |                                       |          |      |  |
| gland   | stover | Negative | digestive organ tumor                 | 5.31E-21 | 3375 |  |
| Mammary | Corn   |          |                                       |          |      |  |
| gland   | stover | Negative | digestive system cancer               | 1.18E-20 | 3343 |  |
| Mammary | Corn   |          |                                       |          |      |  |
| gland   | stover | Negative | disorder of basal ganglia             | 1.10E-18 | 420  |  |
| Mammary | Corn   |          |                                       |          |      |  |
| gland   | stover | Negative | quantity of blood cells               | 3.15E-18 | 542  |  |
| Mammary | Corn   |          |                                       |          |      |  |
| gland   | stover | Negative | angiogenesis                          | 3.65E-18 | 485  |  |
| Mammary | Corn   |          |                                       |          |      |  |
| gland   | stover | Negative | cell death of connective tissue cells | 2.66E-17 | 335  |  |
| Mammary | Corn   |          |                                       |          |      |  |
| gland   | stover | Negative | abnormal morphology of cells          | 2.82E-17 | 647  |  |
| Mammary | Corn   |          |                                       |          |      |  |
| gland   | stover | Negative | concentration of lipid                | 4.58E-17 | 435  |  |
| Mammary | Corn   |          |                                       |          |      |  |
| gland   | stover | Negative | neuromuscular disease                 | 9.21E-17 | 468  |  |
| Mammary | Corn   |          |                                       |          |      |  |
| gland   | stover | Negative | quantity of leukocytes                | 1.20E-16 | 483  |  |
| Mammary | Corn   |          |                                       |          |      |  |
| gland   | stover | Negative | cell movement of tumor cell lines     | 1.66E-16 | 452  |  |
| Mammary | Corn   |          |                                       |          |      |  |
| gland   | stover | Negative | vasculogenesis                        | 1.86E-16 | 397  |  |
| Mammary | Corn   |          |                                       |          |      |  |
| gland   | stover | Negative | Huntington's Disease                  | 2.03E-16 | 318  |  |
| Mammary | Corn   |          |                                       |          |      |  |
| gland   | stover | Negative | morphology of cardiovascular system   | 2.09E-16 | 340  |  |
| Mammary | Corn   |          |                                       |          |      |  |
| gland   | stover | Negative | size of body                          | 2.24E-16 | 451  |  |
| Mammary | Corn   |          |                                       |          |      |  |
| gland   | stover | Negative | cell viability of tumor cell lines    | 3.39E-16 | 416  |  |
| Mammary | Corn   | Negative | function of blood cells               | 3.43E-16 | 323  |  |

|         |        |          |                                    |          |     |
|---------|--------|----------|------------------------------------|----------|-----|
| gland   | stover |          |                                    |          |     |
| Mammary | Corn   |          |                                    |          |     |
| gland   | stover | Negative | formation of cellular protrusions  | 4.69E-16 | 474 |
| Mammary | Corn   |          |                                    |          |     |
| gland   | stover | Negative | dyskinesia                         | 5.62E-16 | 337 |
| Mammary | Corn   |          |                                    |          |     |
| gland   | stover | Negative | synthesis of lipid                 | 1.16E-15 | 383 |
| Mammary | Corn   |          |                                    |          |     |
| gland   | stover | Negative | neurological signs                 | 1.65E-15 | 352 |
| Mammary | Corn   |          |                                    |          |     |
| gland   | stover | Negative | morphology of body cavity          | 1.68E-15 | 606 |
| Mammary | Corn   |          |                                    |          |     |
| gland   | stover | Negative | function of leukocytes             | 2.08E-15 | 296 |
| Mammary | Corn   |          |                                    |          |     |
| gland   | stover | Negative | cell cycle progression             | 2.17E-15 | 538 |
| Mammary | Corn   |          |                                    |          |     |
| gland   | stover | Negative | abnormal morphology of body cavity | 4.24E-15 | 580 |
| Mammary | Corn   |          |                                    |          |     |
| gland   | stover | Negative | development of cytoplasm           | 7.87E-15 | 257 |
| Mammary | Corn   |          |                                    |          |     |
| gland   | stover | Negative | growth of organism                 | 9.71E-15 | 437 |
| Mammary | Corn   |          |                                    |          |     |
| gland   | stover | Negative | cell movement of blood cells       | 2.01E-14 | 454 |
| Mammary | Corn   |          |                                    |          |     |
| gland   | stover | Negative | phosphorylation of protein         | 2.02E-14 | 388 |
| Mammary | Corn   |          |                                    |          |     |
| gland   | stover | Negative | migration of blood cells           | 3.36E-14 | 452 |
| Mammary | Corn   |          |                                    |          |     |
| gland   | stover | Negative | infection by RNA virus             | 3.41E-14 | 449 |
| Mammary | Corn   |          |                                    |          |     |
| gland   | stover | Negative | leukocyte migration                | 3.92E-14 | 451 |
| Mammary | Corn   |          |                                    |          |     |
| gland   | stover | Negative | concentration of fatty acid        | 5.50E-14 | 163 |
| Mammary | Corn   |          |                                    |          |     |
| gland   | stover | Negative | cell movement of leukocytes        | 5.64E-14 | 401 |
| Mammary | Corn   |          |                                    |          |     |
| gland   | stover | Negative | transcription of DNA               | 1.04E-13 | 749 |
| Mammary | Corn   |          |                                    |          |     |
| gland   | stover | Negative | invasion of cells                  | 1.07E-13 | 448 |
| Mammary | Corn   |          |                                    |          |     |
| gland   | stover | Negative | migration of tumor cell lines      | 1.26E-13 | 371 |
| Mammary | Corn   |          |                                    |          |     |
| gland   | stover | Negative | cell spreading                     | 2.06E-13 | 160 |
| Mammary | Corn   | Negative | growth of connective tissue        | 2.59E-13 | 340 |

|         |        |          |                                              |          |     |
|---------|--------|----------|----------------------------------------------|----------|-----|
| gland   | stover |          |                                              |          |     |
| Mammary | Corn   |          |                                              |          |     |
| gland   | stover | Negative | cell death of blood cells                    | 3.18E-13 | 363 |
| Mammary | Corn   |          |                                              |          |     |
| gland   | stover | Negative | necrosis of epithelial tissue                | 3.19E-13 | 313 |
| Mammary | Corn   |          |                                              |          |     |
| gland   | stover | Negative | proliferation of connective tissue cells     | 3.20E-13 | 315 |
| Mammary | Corn   |          |                                              |          |     |
| gland   | stover | Negative | quantity of lymphocytes                      | 4.41E-13 | 369 |
| Mammary | Corn   |          |                                              |          |     |
| gland   | stover | Negative | growth of epithelial tissue                  | 4.46E-13 | 356 |
| Mammary | Corn   |          |                                              |          |     |
| gland   | stover | Negative | transactivation                              | 5.38E-13 | 307 |
| Mammary | Corn   |          |                                              |          |     |
| gland   | stover | Negative | infection of cells                           | 9.43E-13 | 410 |
| Mammary | Corn   |          |                                              |          |     |
| gland   | stover | Negative | protein kinase cascade                       | 9.53E-13 | 230 |
| Mammary | Corn   |          |                                              |          |     |
| gland   | stover | Negative | infection by Retroviridae                    | 1.03E-12 | 373 |
| Mammary | Corn   |          |                                              |          |     |
| gland   | stover | Negative | degeneration of nervous system               | 1.33E-12 | 163 |
| Mammary | Corn   |          |                                              |          |     |
| gland   | stover | Negative | cell death of immune cells                   | 1.60E-12 | 344 |
| Mammary | Corn   |          |                                              |          |     |
| gland   | stover | Negative | abnormal morphology of cardiovascular system | 1.65E-12 | 300 |
| Mammary | Corn   |          |                                              |          |     |
| gland   | stover | Negative | autosomal recessive disease                  | 1.79E-12 | 466 |
| Mammary | Corn   |          |                                              |          |     |
| gland   | stover | Negative | proliferation of blood cells                 | 2.25E-12 | 429 |
| Mammary | Corn   |          |                                              |          |     |
| gland   | stover | Negative | quantity of mononuclear leukocytes           | 2.28E-12 | 379 |
| Mammary | Corn   |          |                                              |          |     |
| gland   | stover | Negative | Neurodegeneration                            | 3.00E-12 | 173 |
| Mammary | Corn   |          |                                              |          |     |
| gland   | stover | Negative | formation of cytoskeleton                    | 3.16E-12 | 206 |
| Mammary | Corn   |          |                                              |          |     |
| gland   | stover | Negative | abnormal morphology of thoracic cavity       | 5.52E-12 | 307 |
| Mammary | Corn   |          |                                              |          |     |
| gland   | stover | Negative | homing of cells                              | 6.17E-12 | 293 |
| Mammary | Corn   |          |                                              |          |     |
| gland   | stover | Negative | infection by lentivirus                      | 6.81E-12 | 367 |
| Mammary | Corn   |          |                                              |          |     |
| gland   | stover | Negative | HIV infection                                | 6.81E-12 | 366 |
| Mammary | Corn   | Negative | organization of organelle                    | 6.81E-12 | 284 |

|         |        |          |                                          |          |     |  |
|---------|--------|----------|------------------------------------------|----------|-----|--|
| gland   | stover |          |                                          |          |     |  |
| Mammary | Corn   |          |                                          |          |     |  |
| gland   | stover | Negative | degeneration of cells                    | 8.17E-12 | 189 |  |
| Mammary | Corn   |          |                                          |          |     |  |
| gland   | stover | Negative | abnormal morphology of epithelial tissue | 1.04E-11 | 225 |  |
| Mammary | Corn   |          |                                          |          |     |  |
| gland   | stover | Negative | cell death of fibroblast cell lines      | 1.16E-11 | 229 |  |
| Mammary | Corn   |          |                                          |          |     |  |
| gland   | stover | Negative | cell transformation                      | 1.35E-11 | 245 |  |
| Mammary | Corn   |          |                                          |          |     |  |
| gland   | stover | Negative | fatty acid metabolism                    | 1.36E-11 | 312 |  |
| Mammary | Corn   |          |                                          |          |     |  |
| gland   | stover | Negative | homing                                   | 1.60E-11 | 299 |  |
| Mammary | Corn   |          |                                          |          |     |  |
| gland   | stover | Negative | cell death of epithelial cells           | 1.76E-11 | 262 |  |
| Mammary | Corn   |          |                                          |          |     |  |
| gland   | stover | Negative | proliferation of immune cells            | 1.99E-11 | 401 |  |
| Mammary | Corn   |          |                                          |          |     |  |
| gland   | stover | Negative | abnormal morphology of abdomen           | 2.04E-11 | 440 |  |
| Mammary | Corn   |          |                                          |          |     |  |
| gland   | stover | Negative | Organ Degeneration                       | 2.07E-11 | 260 |  |
| Mammary | Corn   |          |                                          |          |     |  |
| gland   | stover | Negative | cell movement of myeloid cells           | 2.55E-11 | 282 |  |
| Mammary | Corn   |          |                                          |          |     |  |
| gland   | stover | Negative | cellular degradation                     | 2.69E-11 | 143 |  |
| Mammary | Corn   |          |                                          |          |     |  |
| gland   | stover | Negative | formation of muscle                      | 2.75E-11 | 213 |  |
| Mammary | Corn   |          |                                          |          |     |  |
| gland   | stover | Negative | ubiquitination of protein                | 3.20E-11 | 181 |  |
| Mammary | Corn   |          |                                          |          |     |  |
| gland   | stover | Negative | apoptosis of blood cells                 | 3.76E-11 | 260 |  |
| Mammary | Corn   |          |                                          |          |     |  |
| gland   | stover | Negative | migration of muscle cells                | 4.13E-11 | 98  |  |
| Mammary | Corn   |          |                                          |          |     |  |
| gland   | stover | Negative | function of cardiovascular system        | 4.31E-11 | 199 |  |
| Mammary | Corn   |          |                                          |          |     |  |
| gland   | stover | Negative | ubiquitination                           | 4.52E-11 | 183 |  |
| Mammary | Corn   |          |                                          |          |     |  |
| gland   | stover | Negative | neuronal cell death                      | 6.44E-11 | 347 |  |
| Mammary | Corn   |          |                                          |          |     |  |
| gland   | stover | Negative | transactivation of RNA                   | 6.45E-11 | 282 |  |
| Mammary | Corn   |          |                                          |          |     |  |
| gland   | stover | Negative | development of connective tissue         | 6.92E-11 | 199 |  |
| Mammary | Corn   | Negative | development of epithelial tissue         | 7.21E-11 | 269 |  |

|         |        |          |                                            |          |     |  |
|---------|--------|----------|--------------------------------------------|----------|-----|--|
| gland   | stover |          |                                            |          |     |  |
| Mammary | Corn   |          |                                            |          |     |  |
| gland   | stover | Negative | chemotaxis of cells                        | 7.39E-11 | 274 |  |
| Mammary | Corn   |          |                                            |          |     |  |
| gland   | stover | Negative | invasion of tumor cell lines               | 7.85E-11 | 339 |  |
| Mammary | Corn   |          |                                            |          |     |  |
| gland   | stover | Negative | function of phagocytes                     | 9.05E-11 | 167 |  |
| Mammary | Corn   |          |                                            |          |     |  |
| gland   | stover | Negative | fibrogenesis                               | 9.47E-11 | 218 |  |
| Mammary | Corn   |          |                                            |          |     |  |
| gland   | stover | Negative | morphology of heart                        | 1.10E-10 | 215 |  |
| Mammary | Corn   |          |                                            |          |     |  |
| gland   | stover | Negative | inflammatory response                      | 1.13E-10 | 391 |  |
| Mammary | Corn   |          |                                            |          |     |  |
| gland   | stover | Negative | development of body trunk                  | 1.27E-10 | 544 |  |
| Mammary | Corn   |          |                                            |          |     |  |
| gland   | stover | Negative | formation of cells                         | 1.33E-10 | 484 |  |
| Mammary | Corn   |          |                                            |          |     |  |
| gland   | stover | Negative | mitosis                                    | 1.40E-10 | 258 |  |
| Mammary | Corn   |          |                                            |          |     |  |
| gland   | stover | Negative | chemotaxis                                 | 1.56E-10 | 281 |  |
| Mammary | Corn   |          |                                            |          |     |  |
| gland   | stover | Negative | differentiation of connective tissue cells | 1.61E-10 | 327 |  |
| Mammary | Corn   |          |                                            |          |     |  |
| gland   | stover | Negative | engulfment of cells                        | 1.66E-10 | 215 |  |
| Mammary | Corn   |          |                                            |          |     |  |
| gland   | stover | Negative | quantity of connective tissue              | 1.76E-10 | 308 |  |
| Mammary | Corn   |          |                                            |          |     |  |
| gland   | stover | Negative | proliferation of lymphocytes               | 1.76E-10 | 366 |  |
| Mammary | Corn   |          |                                            |          |     |  |
| gland   | stover | Negative | proliferation of mononuclear leukocytes    | 1.92E-10 | 371 |  |
| Mammary | Corn   |          |                                            |          |     |  |
| gland   | stover | Negative | infection by HIV-1                         | 2.04E-10 | 311 |  |
| Mammary | Corn   |          |                                            |          |     |  |
| gland   | stover | Negative | quantity of B lymphocytes                  | 2.04E-10 | 185 |  |
| Mammary | Corn   |          |                                            |          |     |  |
| gland   | stover | Negative | growth of lymphatic system component       | 2.05E-10 | 110 |  |
| Mammary | Corn   |          |                                            |          |     |  |
| gland   | stover | Negative | growth of embryo                           | 2.20E-10 | 248 |  |
| Mammary | Corn   |          |                                            |          |     |  |
| gland   | stover | Negative | accumulation of lipid                      | 2.40E-10 | 162 |  |
| Mammary | Corn   |          |                                            |          |     |  |
| gland   | stover | Negative | cell movement of muscle cells              | 2.47E-10 | 104 |  |
| Mammary | Corn   | Negative | growth of muscle tissue                    | 2.47E-10 | 198 |  |

|         |        |          |                                          |          |     |  |
|---------|--------|----------|------------------------------------------|----------|-----|--|
| gland   | stover |          |                                          |          |     |  |
| Mammary | Corn   |          |                                          |          |     |  |
| gland   | stover | Negative | cell movement of phagocytes              | 2.52E-10 | 282 |  |
| Mammary | Corn   |          |                                          |          |     |  |
| gland   | stover | Negative | proliferation of fibroblasts             | 2.82E-10 | 188 |  |
| Mammary | Corn   |          |                                          |          |     |  |
| gland   | stover | Negative | apoptosis of fibroblast cell lines       | 2.83E-10 | 176 |  |
| Mammary | Corn   |          |                                          |          |     |  |
| gland   | stover | Negative | apoptosis of leukocytes                  | 2.85E-10 | 238 |  |
| Mammary | Corn   |          |                                          |          |     |  |
| gland   | stover | Negative | differentiation of connective tissue     | 3.06E-10 | 366 |  |
| Mammary | Corn   |          |                                          |          |     |  |
| gland   | stover | Negative | activation of cells                      | 3.84E-10 | 479 |  |
| Mammary | Corn   |          |                                          |          |     |  |
| gland   | stover | Negative | colony formation of cells                | 4.00E-10 | 254 |  |
| Mammary | Corn   |          |                                          |          |     |  |
| gland   | stover | Negative | formation of filaments                   | 4.02E-10 | 209 |  |
| Mammary | Corn   |          |                                          |          |     |  |
| gland   | stover | Negative | morphology of connective tissue          | 4.26E-10 | 239 |  |
| Mammary | Corn   |          |                                          |          |     |  |
| gland   | stover | Negative | function of antigen presenting cells     | 4.40E-10 | 135 |  |
| Mammary | Corn   |          |                                          |          |     |  |
| gland   | stover | Negative | proliferation of muscle cells            | 4.45E-10 | 196 |  |
| Mammary | Corn   |          |                                          |          |     |  |
| gland   | stover | Negative | degeneration of neurons                  | 4.51E-10 | 132 |  |
| Mammary | Corn   |          |                                          |          |     |  |
| gland   | stover | Negative | synthesis of reactive oxygen species     | 4.51E-10 | 248 |  |
| Mammary | Corn   |          |                                          |          |     |  |
| gland   | stover | Negative | cell death of cervical cancer cell lines | 5.12E-10 | 186 |  |
| Mammary | Corn   |          |                                          |          |     |  |
| gland   | stover | Negative | development of blood cells               | 5.25E-10 | 329 |  |
| Mammary | Corn   |          |                                          |          |     |  |
| gland   | stover | Negative | migration of smooth muscle cells         | 5.50E-10 | 87  |  |
| Mammary | Corn   |          |                                          |          |     |  |
| gland   | stover | Negative | replication of virus                     | 5.78E-10 | 286 |  |
| Mammary | Corn   |          |                                          |          |     |  |
| gland   | stover | Negative | formation of actin stress fibers         | 6.00E-10 | 132 |  |
| Mammary | Corn   |          |                                          |          |     |  |
| gland   | stover | Negative | function of myeloid cells                | 7.49E-10 | 131 |  |
| Mammary | Corn   |          |                                          |          |     |  |
| gland   | stover | Negative | growth of lesion                         | 8.25E-10 | 395 |  |
| Mammary | Corn   |          |                                          |          |     |  |
| gland   | stover | Negative | seizure disorder                         | 9.28E-10 | 242 |  |
| Mammary | Corn   | Negative | growth of tumor                          | 9.63E-10 | 394 |  |



|         |        |          |                                           |          |     |
|---------|--------|----------|-------------------------------------------|----------|-----|
| gland   | stover |          |                                           |          |     |
| Mammary | Corn   |          |                                           |          |     |
| gland   | stover | Negative | replication of RNA virus                  | 9.92E-10 | 259 |
| Mammary | Corn   |          |                                           |          |     |
| gland   | stover | Negative | small GTPase mediated signal transduction | 9.92E-10 | 104 |
| Mammary | Corn   |          |                                           |          |     |
| gland   | stover | Negative | cellular infiltration of blood cells      | 9.92E-10 | 203 |
| Mammary | Corn   |          |                                           |          |     |
| gland   | stover | Negative | uptake of carbohydrate                    | 9.94E-10 | 156 |
| Mammary | Corn   |          |                                           |          |     |
| gland   | stover | Negative | morphology of nervous system              | 1.04E-09 | 388 |
| Mammary | Corn   |          |                                           |          |     |
| gland   | stover | Negative | colony formation                          | 1.17E-09 | 273 |
| Mammary | Corn   |          |                                           |          |     |
| gland   | stover | Negative | Growth Failure                            | 1.21E-09 | 302 |
| Mammary | Corn   |          |                                           |          |     |
| gland   | stover | Negative | demyelination                             | 1.24E-09 | 72  |
| Mammary | Corn   |          |                                           |          |     |
| gland   | stover | Negative | development of vasculature                | 1.25E-09 | 217 |
| Mammary | Corn   |          |                                           |          |     |
| gland   | stover | Negative | function of macrophages                   | 1.29E-09 | 101 |
| Mammary | Corn   |          |                                           |          |     |
| gland   | stover | Negative | morphology of digestive system            | 1.29E-09 | 289 |
| Mammary | Corn   |          |                                           |          |     |
| gland   | stover | Negative | cellular infiltration                     | 1.38E-09 | 226 |
| Mammary | Corn   |          |                                           |          |     |
| gland   | stover | Negative | formation of skin                         | 1.43E-09 | 192 |
| Mammary | Corn   |          |                                           |          |     |
| gland   | stover | Negative | cellular infiltration by leukocytes       | 1.44E-09 | 202 |
| Mammary | Corn   |          |                                           |          |     |
| gland   | stover | Negative | synthesis of DNA                          | 1.47E-09 | 216 |
| Mammary | Corn   |          |                                           |          |     |
| gland   | stover | Negative | uptake of monosaccharide                  | 1.47E-09 | 145 |
| Mammary | Corn   |          |                                           |          |     |
| gland   | stover | Negative | abnormal morphology of digestive system   | 1.58E-09 | 276 |
| Mammary | Corn   |          |                                           |          |     |
| gland   | stover | Negative | interphase                                | 1.73E-09 | 328 |
| Mammary | Corn   |          |                                           |          |     |
| gland   | stover | Negative | development of cardiovascular tissue      | 1.79E-09 | 193 |
| Mammary | Corn   |          |                                           |          |     |
| gland   | stover | Negative | cellular infiltration of cells            | 1.88E-09 | 206 |
| Mammary | Corn   |          |                                           |          |     |
| gland   | stover | Negative | cell movement of smooth muscle cells      | 1.96E-09 | 92  |
| Mammary | Corn   | Negative | differentiation of epithelial tissue      | 1.96E-09 | 188 |

|         |        |          |                                         |          |      |
|---------|--------|----------|-----------------------------------------|----------|------|
| gland   | stover |          |                                         |          |      |
| Mammary | Corn   |          |                                         |          |      |
| gland   | stover | Negative | cell movement of endothelial cells      | 2.27E-09 | 185  |
| Mammary | Corn   |          |                                         |          |      |
| gland   | stover | Negative | metabolism of membrane lipid derivative | 2.62E-09 | 201  |
| Mammary | Corn   |          |                                         |          |      |
| gland   | stover | Negative | activation of DNA endogenous promoter   | 2.62E-09 | 577  |
| Mammary | Corn   |          |                                         |          |      |
| gland   | stover | Negative | quantity of lymphatic system component  | 2.93E-09 | 196  |
| Mammary | Corn   |          |                                         |          |      |
| gland   | stover | Negative | seizures                                | 3.51E-09 | 206  |
| Mammary | Corn   |          |                                         |          |      |
| gland   | stover | Negative | quantity of T lymphocytes               | 3.78E-09 | 270  |
| Mammary | Corn   |          |                                         |          |      |
| gland   | stover | Negative | development of leukocytes               | 3.81E-09 | 295  |
| Mammary | Corn   |          |                                         |          |      |
| gland   | stover | Negative | endothelial cell development            | 4.31E-09 | 184  |
| Mammary | Corn   |          |                                         |          |      |
| gland   | stover | Negative | autophagy                               | 4.31E-09 | 194  |
| Mammary | Corn   |          |                                         |          |      |
| gland   | stover | Negative | metabolism of reactive oxygen species   | 4.64E-09 | 253  |
| Mammary | Corn   |          |                                         |          |      |
| gland   | stover | Negative | genital tumor                           | 4.70E-09 | 1803 |
| Mammary | Corn   |          |                                         |          |      |
| gland   | stover | Negative | secretion of molecule                   | 5.06E-09 | 277  |
| Mammary | Corn   |          |                                         |          |      |
| gland   | stover | Negative | adenocarcinoma                          | 5.14E-09 | 2845 |
| Mammary | Corn   |          |                                         |          |      |
| gland   | stover | Negative | dysmyelination                          | 5.14E-09 | 78   |
| Mammary | Corn   |          |                                         |          |      |
| gland   | stover | Negative | recruitment of cells                    | 5.39E-09 | 185  |
| Mammary | Corn   |          |                                         |          |      |
| gland   | stover | Negative | benign neoplasia                        | 6.24E-09 | 448  |
| Mammary | Corn   |          |                                         |          |      |
| gland   | stover | Negative | proliferation of epithelial cells       | 6.54E-09 | 249  |
| Mammary | Corn   |          |                                         |          |      |
| gland   | stover | Negative | metabolism of protein                   | 7.14E-09 | 469  |
| Mammary | Corn   |          |                                         |          |      |
| gland   | stover | Negative | hypersensitive reaction                 | 7.14E-09 | 219  |
| Mammary | Corn   |          |                                         |          |      |
| gland   | stover | Negative | development of endothelial tissue       | 7.23E-09 | 189  |
| Mammary | Corn   |          |                                         |          |      |
| gland   | stover | Negative | development of mononuclear leukocytes   | 8.07E-09 | 279  |
| Mammary | Corn   | Negative | development of lymphocytes              | 8.15E-09 | 277  |

|         |        |          |                                         |          |      |  |
|---------|--------|----------|-----------------------------------------|----------|------|--|
| gland   | stover |          |                                         |          |      |  |
| Mammary | Corn   |          |                                         |          |      |  |
| gland   | stover | Negative | abnormal morphology of heart            | 8.25E-09 | 197  |  |
| Mammary | Corn   |          |                                         |          |      |  |
| gland   | stover | Negative | cell death of epithelial cell lines     | 8.28E-09 | 149  |  |
| Mammary | Corn   |          |                                         |          |      |  |
| gland   | stover | Negative | hepatocellular carcinoma                | 8.50E-09 | 1862 |  |
| Mammary | Corn   |          |                                         |          |      |  |
| gland   | stover | Negative | survival of organism                    | 8.85E-09 | 346  |  |
| Mammary | Corn   |          |                                         |          |      |  |
| gland   | stover | Negative | liver tumor                             | 9.71E-09 | 1932 |  |
| Mammary | Corn   |          |                                         |          |      |  |
| gland   | stover | Negative | concentration of sterol                 | 1.00E-08 | 160  |  |
| Mammary | Corn   |          |                                         |          |      |  |
| gland   | stover | Negative | proliferation of T lymphocytes          | 1.05E-08 | 300  |  |
| Mammary | Corn   |          |                                         |          |      |  |
| gland   | stover | Negative | Hypertrophy                             | 1.09E-08 | 239  |  |
| Mammary | Corn   |          |                                         |          |      |  |
| gland   | stover | Negative | proliferation of smooth muscle cells    | 1.09E-08 | 150  |  |
| Mammary | Corn   |          |                                         |          |      |  |
| gland   | stover | Negative | formation of actin filaments            | 1.22E-08 | 159  |  |
| Mammary | Corn   |          |                                         |          |      |  |
| gland   | stover | Negative | binding of DNA                          | 1.22E-08 | 261  |  |
| Mammary | Corn   |          |                                         |          |      |  |
| gland   | stover | Negative | abnormal morphology of nervous system   | 1.32E-08 | 355  |  |
| Mammary | Corn   |          |                                         |          |      |  |
| gland   | stover | Negative | epileptic seizure                       | 1.36E-08 | 93   |  |
| Mammary | Corn   |          |                                         |          |      |  |
| gland   | stover | Negative | metabolism of carbohydrate              | 1.52E-08 | 307  |  |
| Mammary | Corn   |          |                                         |          |      |  |
| gland   | stover | Negative | cell movement of mononuclear leukocytes | 1.53E-08 | 233  |  |
| Mammary | Corn   |          |                                         |          |      |  |
| gland   | stover | Negative | synthesis of fatty acid                 | 1.68E-08 | 162  |  |
| Mammary | Corn   |          |                                         |          |      |  |
| gland   | stover | Negative | neurodegeneration of neurites           | 1.76E-08 | 55   |  |
| Mammary | Corn   |          |                                         |          |      |  |
| gland   | stover | Negative | hepatobiliary system cancer             | 1.76E-08 | 1925 |  |
| Mammary | Corn   |          |                                         |          |      |  |
| gland   | stover | Negative | differentiation of muscle cell lines    | 1.81E-08 | 90   |  |
| Mammary | Corn   |          |                                         |          |      |  |
| gland   | stover | Negative | quantity of antigen presenting cells    | 1.81E-08 | 145  |  |
| Mammary | Corn   |          |                                         |          |      |  |
| gland   | stover | Negative | peripheral arterial disease             | 1.81E-08 | 114  |  |
| Mammary | Corn   | Negative | cell death of mononuclear leukocytes    | 1.87E-08 | 202  |  |

|         |        |          |                                            |          |      |  |
|---------|--------|----------|--------------------------------------------|----------|------|--|
| gland   | stover |          |                                            |          |      |  |
| Mammary | Corn   |          |                                            |          |      |  |
| gland   | stover | Negative | arthritis                                  | 1.87E-08 | 450  |  |
| Mammary | Corn   |          |                                            |          |      |  |
| gland   | stover | Negative | liver cancer                               | 2.00E-08 | 1916 |  |
| Mammary | Corn   |          |                                            |          |      |  |
| gland   | stover | Negative | apoptosis of connective tissue cells       | 2.00E-08 | 154  |  |
| Mammary | Corn   |          |                                            |          |      |  |
| gland   | stover | Negative | arthropathy                                | 2.00E-08 | 457  |  |
| Mammary | Corn   |          |                                            |          |      |  |
| gland   | stover | Negative | cell death of central nervous system cells | 2.37E-08 | 152  |  |
| Mammary | Corn   |          |                                            |          |      |  |
| gland   | stover | Negative | endocytosis                                | 2.38E-08 | 177  |  |
| Mammary | Corn   |          |                                            |          |      |  |
| gland   | stover | Negative | morphology of head                         | 2.40E-08 | 422  |  |
| Mammary | Corn   |          |                                            |          |      |  |
| gland   | stover | Negative | metabolism of nucleotide                   | 2.50E-08 | 221  |  |
| Mammary | Corn   |          |                                            |          |      |  |
| gland   | stover | Negative | homeostasis of leukocytes                  | 2.83E-08 | 275  |  |
| Mammary | Corn   |          |                                            |          |      |  |
| gland   | stover | Negative | autosomal dominant disease                 | 2.83E-08 | 313  |  |
| Mammary | Corn   |          |                                            |          |      |  |
| gland   | stover | Negative | concentration of cholesterol               | 2.86E-08 | 151  |  |
| Mammary | Corn   |          |                                            |          |      |  |
| gland   | stover | Negative | neuritogenesis                             | 2.86E-08 | 288  |  |
| Mammary | Corn   |          |                                            |          |      |  |
| gland   | stover | Negative | recruitment of phagocytes                  | 3.00E-08 | 130  |  |
| Mammary | Corn   |          |                                            |          |      |  |
| gland   | stover | Negative | transport of protein                       | 3.37E-08 | 156  |  |
| Mammary | Corn   |          |                                            |          |      |  |
| gland   | stover | Negative | Lymphocyte homeostasis                     | 3.41E-08 | 270  |  |
| Mammary | Corn   |          |                                            |          |      |  |
| gland   | stover | Negative | apoptosis of epithelial cell lines         | 3.41E-08 | 119  |  |
| Mammary | Corn   |          |                                            |          |      |  |
| gland   | stover | Negative | cell death of brain                        | 3.58E-08 | 151  |  |
| Mammary | Corn   |          |                                            |          |      |  |
| gland   | stover | Negative | phosphorylation of L-amino acid            | 3.93E-08 | 117  |  |
| Mammary | Corn   |          |                                            |          |      |  |
| gland   | stover | Negative | T cell development                         | 3.93E-08 | 250  |  |
| Mammary | Corn   |          |                                            |          |      |  |
| gland   | stover | Negative | paraproteinemia                            | 3.99E-08 | 172  |  |
| Mammary | Corn   |          |                                            |          |      |  |
| gland   | stover | Negative | proliferation of neuronal cells            | 4.00E-08 | 284  |  |
| Mammary | Corn   | Negative | production of reactive oxygen species      | 4.05E-08 | 186  |  |

|         |        |          |                                                    |          |     |
|---------|--------|----------|----------------------------------------------------|----------|-----|
| gland   | stover |          |                                                    |          |     |
| Mammary | Corn   |          |                                                    |          |     |
| gland   | stover | Negative | development of body axis                           | 4.35E-08 | 499 |
| Mammary | Corn   |          |                                                    |          |     |
| gland   | stover | Negative | cell death of lymphocytes                          | 4.47E-08 | 195 |
| Mammary | Corn   |          |                                                    |          |     |
| gland   | stover | Negative | migration of endothelial cells                     | 4.49E-08 | 168 |
| Mammary | Corn   |          |                                                    |          |     |
| gland   | stover | Negative | quantity of interleukin                            | 5.27E-08 | 78  |
| Mammary | Corn   |          |                                                    |          |     |
| gland   | stover | Negative | function of muscle                                 | 5.33E-08 | 177 |
| Mammary | Corn   |          |                                                    |          |     |
| gland   | stover | Negative | development of head                                | 5.40E-08 | 467 |
| Mammary | Corn   |          |                                                    |          |     |
| gland   | stover | Negative | activation of enzyme                               | 5.43E-08 | 196 |
| Mammary | Corn   |          |                                                    |          |     |
| gland   | stover | Negative | size of embryo                                     | 5.62E-08 | 181 |
| Mammary | Corn   |          |                                                    |          |     |
| gland   | stover | Negative | plasma cell dyscrasia                              | 5.87E-08 | 171 |
| Mammary | Corn   |          |                                                    |          |     |
| gland   | stover | Negative | movement of vascular endothelial cells             | 6.20E-08 | 98  |
| Mammary | Corn   |          |                                                    |          |     |
| gland   | stover | Negative | recruitment of blood cells                         | 6.86E-08 | 168 |
| Mammary | Corn   |          |                                                    |          |     |
| gland   | stover | Negative | quantity of steroid                                | 6.89E-08 | 232 |
| Mammary | Corn   |          |                                                    |          |     |
| gland   | stover | Negative | differentiation of bone                            | 6.89E-08 | 206 |
| Mammary | Corn   |          |                                                    |          |     |
| gland   | stover | Negative | T cell homeostasis                                 | 7.09E-08 | 255 |
| Mammary | Corn   |          |                                                    |          |     |
| gland   | stover | Negative | immune response of cells                           | 7.44E-08 | 281 |
| Mammary | Corn   |          |                                                    |          |     |
| gland   | stover | Negative | cell death of kidney cells                         | 7.90E-08 | 177 |
| Mammary | Corn   |          |                                                    |          |     |
| gland   | stover | Negative | differentiation of bone cells                      | 8.19E-08 | 204 |
| Mammary | Corn   |          |                                                    |          |     |
| gland   | stover | Negative | metabolism of nucleic acid component or derivative | 8.21E-08 | 256 |
| Mammary | Corn   |          |                                                    |          |     |
| gland   | stover | Negative | cognition                                          | 8.22E-08 | 226 |
| Mammary | Corn   |          |                                                    |          |     |
| gland   | stover | Negative | Bleeding                                           | 8.27E-08 | 212 |
| Mammary | Corn   |          |                                                    |          |     |
| gland   | stover | Negative | morphology of cardiovascular tissue                | 8.36E-08 | 52  |
| Mammary | Corn   | Negative | necrosis of kidney                                 | 8.48E-08 | 184 |

|         |        |          |                                          |          |     |  |
|---------|--------|----------|------------------------------------------|----------|-----|--|
| gland   | stover |          |                                          |          |     |  |
| Mammary | Corn   |          |                                          |          |     |  |
| gland   | stover | Negative | differentiation of epithelial cells      | 8.64E-08 | 160 |  |
| Mammary | Corn   |          |                                          |          |     |  |
| gland   | stover | Negative | blood protein disorder                   | 8.86E-08 | 189 |  |
| Mammary | Corn   |          |                                          |          |     |  |
| gland   | stover | Negative | apoptosis of cervical cancer cell lines  | 8.89E-08 | 145 |  |
| Mammary | Corn   |          |                                          |          |     |  |
| gland   | stover | Negative | growth of lymphoid organ                 | 9.30E-08 | 93  |  |
| Mammary | Corn   |          |                                          |          |     |  |
| gland   | stover | Negative | recruitment of leukocytes                | 9.52E-08 | 165 |  |
| Mammary | Corn   |          |                                          |          |     |  |
| gland   | stover | Negative | abnormal morphology of embryonic tissue  | 9.63E-08 | 269 |  |
| Mammary | Corn   |          |                                          |          |     |  |
| gland   | stover | Negative | morphology of lymphatic system component | 9.63E-08 | 208 |  |
| Mammary | Corn   |          |                                          |          |     |  |
| gland   | stover | Negative | infection of tumor cell lines            | 9.64E-08 | 252 |  |
| Mammary | Corn   |          |                                          |          |     |  |
| gland   | stover | Negative | neurodegeneration of axons               | 9.83E-08 | 51  |  |
| Mammary | Corn   |          |                                          |          |     |  |
| gland   | stover | Negative | recruitment of macrophages               | 9.90E-08 | 61  |  |
| Mammary | Corn   |          |                                          |          |     |  |
| gland   | stover | Negative | cell death of liver cells                | 1.02E-07 | 104 |  |
| Mammary | Corn   |          |                                          |          |     |  |
| gland   | stover | Negative | uptake of D-glucose                      | 1.03E-07 | 116 |  |
| Mammary | Corn   |          |                                          |          |     |  |
| gland   | stover | Negative | peripheral vascular disease              | 1.06E-07 | 191 |  |
| Mammary | Corn   |          |                                          |          |     |  |
| gland   | stover | Negative | morphology of endothelial cells          | 1.06E-07 | 39  |  |
| Mammary | Corn   |          |                                          |          |     |  |
| gland   | stover | Negative | quantity of carbohydrate                 | 1.08E-07 | 255 |  |
| Mammary | Corn   |          |                                          |          |     |  |
| gland   | stover | Negative | uptake of D-hexose                       | 1.08E-07 | 117 |  |
| Mammary | Corn   |          |                                          |          |     |  |
| gland   | stover | Negative | quantity of reactive oxygen species      | 1.11E-07 | 95  |  |
| Mammary | Corn   |          |                                          |          |     |  |
| gland   | stover | Negative | formation of plasma membrane projections | 1.11E-07 | 291 |  |
| Mammary | Corn   |          |                                          |          |     |  |
| gland   | stover | Negative | perinatal death                          | 1.12E-07 | 290 |  |
| Mammary | Corn   |          |                                          |          |     |  |
| gland   | stover | Negative | behavior                                 | 1.18E-07 | 468 |  |
| Mammary | Corn   |          |                                          |          |     |  |
| gland   | stover | Negative | abnormal morphology of head              | 1.21E-07 | 398 |  |
| Mammary | Corn   | Negative | recruitment of antigen presenting cells  | 1.26E-07 | 68  |  |

|         |        |          |                                        |          |      |  |
|---------|--------|----------|----------------------------------------|----------|------|--|
| gland   | stover |          |                                        |          |      |  |
| Mammary | Corn   |          |                                        |          |      |  |
| gland   | stover | Negative | quantity of phagocytes                 | 1.34E-07 | 211  |  |
| Mammary | Corn   |          |                                        |          |      |  |
| gland   | stover | Negative | differentiation of muscle              | 1.37E-07 | 154  |  |
| Mammary | Corn   |          |                                        |          |      |  |
| gland   | stover | Negative | cell death of brain cells              | 1.45E-07 | 140  |  |
| Mammary | Corn   |          |                                        |          |      |  |
| gland   | stover | Negative | proliferation of endothelial cells     | 1.50E-07 | 158  |  |
| Mammary | Corn   |          |                                        |          |      |  |
| gland   | stover | Negative | autophagy of cells                     | 1.59E-07 | 136  |  |
| Mammary | Corn   |          |                                        |          |      |  |
| gland   | stover | Negative | quantity of metal                      | 1.59E-07 | 245  |  |
| Mammary | Corn   |          |                                        |          |      |  |
| gland   | stover | Negative | activation of Protein kinase           | 1.59E-07 | 130  |  |
| Mammary | Corn   |          |                                        |          |      |  |
| gland   | stover | Negative | I-kappaB kinase/NF-kappaB cascade      | 1.67E-07 | 93   |  |
| Mammary | Corn   |          |                                        |          |      |  |
| gland   | stover | Negative | abdominal adenocarcinoma               | 1.67E-07 | 2575 |  |
| Mammary | Corn   |          |                                        |          |      |  |
| gland   | stover | Negative | quantity of protein in blood           | 1.79E-07 | 249  |  |
| Mammary | Corn   |          |                                        |          |      |  |
| gland   | stover | Negative | proliferation of fibroblast cell lines | 1.88E-07 | 210  |  |
| Mammary | Corn   |          |                                        |          |      |  |
| gland   | stover | Negative | cell death of cerebral cortex cells    | 2.01E-07 | 119  |  |
| Mammary | Corn   |          |                                        |          |      |  |
| gland   | stover | Negative | apoptosis of mononuclear leukocytes    | 2.02E-07 | 179  |  |
| Mammary | Corn   |          |                                        |          |      |  |
| gland   | stover | Negative | permeability of cells                  | 2.17E-07 | 57   |  |
| Mammary | Corn   |          |                                        |          |      |  |
| gland   | stover | Negative | female genital tract serous cancer     | 2.19E-07 | 192  |  |
| Mammary | Corn   |          |                                        |          |      |  |
| gland   | stover | Negative | differentiation of leukocytes          | 2.20E-07 | 324  |  |
| Mammary | Corn   |          |                                        |          |      |  |
| gland   | stover | Negative | activation of leukocytes               | 2.28E-07 | 336  |  |
| Mammary | Corn   |          |                                        |          |      |  |
| gland   | stover | Negative | vascularization                        | 2.31E-07 | 122  |  |
| Mammary | Corn   |          |                                        |          |      |  |
| gland   | stover | Negative | synthesis of nitric oxide              | 2.31E-07 | 141  |  |
| Mammary | Corn   |          |                                        |          |      |  |
| gland   | stover | Negative | apoptosis of muscle                    | 2.31E-07 | 134  |  |
| Mammary | Corn   |          |                                        |          |      |  |
| gland   | stover | Negative | morphology of endothelial tissue       | 2.31E-07 | 49   |  |
| Mammary | Corn   | Negative | cell death of tumor                    | 2.58E-07 | 190  |  |

|         |        |          |                                          |          |      |
|---------|--------|----------|------------------------------------------|----------|------|
| gland   | stover |          |                                          |          |      |
| Mammary | Corn   |          |                                          |          |      |
| gland   | stover | Negative | concentration of acylglycerol            | 2.62E-07 | 168  |
| Mammary | Corn   |          |                                          |          |      |
| gland   | stover | Negative | internalization by tumor cell lines      | 2.83E-07 | 66   |
| Mammary | Corn   |          |                                          |          |      |
| gland   | stover | Negative | apoptosis of muscle cells                | 2.83E-07 | 133  |
| Mammary | Corn   |          |                                          |          |      |
| gland   | stover | Negative | synthesis of nucleotide                  | 2.96E-07 | 181  |
| Mammary | Corn   |          |                                          |          |      |
| gland   | stover | Negative | apoptosis of pheochromocytoma cell lines | 2.96E-07 | 53   |
| Mammary | Corn   |          |                                          |          |      |
| gland   | stover | Negative | quantity of metal ion                    | 3.00E-07 | 218  |
| Mammary | Corn   |          |                                          |          |      |
| gland   | stover | Negative | quantity of cytokine                     | 3.20E-07 | 130  |
| Mammary | Corn   |          |                                          |          |      |
| gland   | stover | Negative | quantity of lymphoid organ               | 3.20E-07 | 155  |
| Mammary | Corn   |          |                                          |          |      |
| gland   | stover | Negative | quantity of IL-6 in blood                | 3.20E-07 | 50   |
| Mammary | Corn   |          |                                          |          |      |
| gland   | stover | Negative | cell death of muscle                     | 3.29E-07 | 172  |
| Mammary | Corn   |          |                                          |          |      |
| gland   | stover | Negative | apoptosis of lymphocytes                 | 3.32E-07 | 173  |
| Mammary | Corn   |          |                                          |          |      |
| gland   | stover | Negative | apoptosis of liver                       | 3.48E-07 | 85   |
| Mammary | Corn   |          |                                          |          |      |
| gland   | stover | Negative | S phase                                  | 3.52E-07 | 133  |
| Mammary | Corn   |          |                                          |          |      |
| gland   | stover | Negative | cell movement of granulocytes            | 3.57E-07 | 184  |
| Mammary | Corn   |          |                                          |          |      |
| gland   | stover | Negative | learning                                 | 3.65E-07 | 206  |
| Mammary | Corn   |          |                                          |          |      |
| gland   | stover | Negative | allergy                                  | 3.66E-07 | 200  |
| Mammary | Corn   |          |                                          |          |      |
| gland   | stover | Negative | Waldenstrom's macroglobulinemia          | 3.66E-07 | 99   |
| Mammary | Corn   |          |                                          |          |      |
| gland   | stover | Negative | function of lymphocytes                  | 3.88E-07 | 170  |
| Mammary | Corn   |          |                                          |          |      |
| gland   | stover | Negative | necrosis of muscle                       | 3.90E-07 | 171  |
| Mammary | Corn   |          |                                          |          |      |
| gland   | stover | Negative | cell death of T lymphocytes              | 4.06E-07 | 158  |
| Mammary | Corn   |          |                                          |          |      |
| gland   | stover | Negative | breast or colorectal cancer              | 4.11E-07 | 2173 |
| Mammary | Corn   | Negative | apoptosis of cardiomyocytes              | 4.16E-07 | 97   |



|         |        |          |                                              |          |     |
|---------|--------|----------|----------------------------------------------|----------|-----|
| gland   | stover |          |                                              |          |     |
| Mammary | Corn   |          |                                              |          |     |
| gland   | stover | Negative | quantity of macrophages                      | 4.18E-07 | 105 |
| Mammary | Corn   |          |                                              |          |     |
| gland   | stover | Negative | occlusion of blood vessel                    | 4.22E-07 | 235 |
| Mammary | Corn   |          |                                              |          |     |
| gland   | stover | Negative | vaso-occlusion                               | 4.25E-07 | 234 |
| Mammary | Corn   |          |                                              |          |     |
| gland   | stover | Negative | apoptosis of epithelial cells                | 4.69E-07 | 144 |
| Mammary | Corn   |          |                                              |          |     |
| gland   | stover | Negative | development of lymphatic system component    | 4.70E-07 | 155 |
| Mammary | Corn   |          |                                              |          |     |
| gland   | stover | Negative | cell death of heart                          | 4.77E-07 | 117 |
| Mammary | Corn   |          |                                              |          |     |
| gland   | stover | Negative | quantity of hematopoietic cells              | 4.78E-07 | 217 |
| Mammary | Corn   |          |                                              |          |     |
| gland   | stover | Negative | apoptosis of heart cells                     | 4.78E-07 | 99  |
| Mammary | Corn   |          |                                              |          |     |
| gland   | stover | Negative | development of lymphatic system              | 4.85E-07 | 177 |
| Mammary | Corn   |          |                                              |          |     |
| gland   | stover | Negative | abnormal morphology of lymphoid organ        | 5.02E-07 | 187 |
| Mammary | Corn   |          |                                              |          |     |
| gland   | stover | Negative | cell movement of fibroblasts                 | 5.02E-07 | 96  |
| Mammary | Corn   |          |                                              |          |     |
| gland   | stover | Negative | concentration of phospholipid                | 5.02E-07 | 96  |
| Mammary | Corn   |          |                                              |          |     |
| gland   | stover | Negative | necrosis of tumor                            | 5.02E-07 | 188 |
| Mammary | Corn   |          |                                              |          |     |
| gland   | stover | Negative | transformation of fibroblast cell lines      | 5.02E-07 | 131 |
| Mammary | Corn   |          |                                              |          |     |
| gland   | stover | Negative | cell death of muscle cells                   | 5.38E-07 | 167 |
| Mammary | Corn   |          |                                              |          |     |
| gland   | stover | Negative | differentiation of muscle cells              | 5.44E-07 | 142 |
| Mammary | Corn   |          |                                              |          |     |
| gland   | stover | Negative | quantity of hematopoietic progenitor cells   | 5.57E-07 | 216 |
| Mammary | Corn   |          |                                              |          |     |
| gland   | stover | Negative | binding of protein binding site              | 5.81E-07 | 145 |
| Mammary | Corn   |          |                                              |          |     |
| gland   | stover | Negative | morphology of lymphoid organ                 | 5.99E-07 | 193 |
| Mammary | Corn   |          |                                              |          |     |
| gland   | stover | Negative | Cytosis                                      | 6.03E-07 | 160 |
| Mammary | Corn   |          |                                              |          |     |
| gland   | stover | Negative | growth of skin                               | 6.05E-07 | 112 |
| Mammary | Corn   | Negative | congenital anomaly of musculoskeletal system | 6.32E-07 | 350 |

|         |        |          |                                              |          |      |  |
|---------|--------|----------|----------------------------------------------|----------|------|--|
| gland   | stover |          |                                              |          |      |  |
| Mammary | Corn   |          |                                              |          |      |  |
| gland   | stover | Negative | cell death of heart cells                    | 6.35E-07 | 113  |  |
| Mammary | Corn   |          |                                              |          |      |  |
| gland   | stover | Negative | activation of blood cells                    | 6.38E-07 | 355  |  |
| Mammary | Corn   |          |                                              |          |      |  |
| gland   | stover | Negative | migration of breast cancer cell lines        | 6.43E-07 | 125  |  |
| Mammary | Corn   |          |                                              |          |      |  |
| gland   | stover | Negative | tumorigenesis of genital organ               | 6.50E-07 | 1723 |  |
| Mammary | Corn   |          |                                              |          |      |  |
| gland   | stover | Negative | occlusion of artery                          | 6.73E-07 | 231  |  |
| Mammary | Corn   |          |                                              |          |      |  |
| gland   | stover | Negative | advanced malignant tumor                     | 6.74E-07 | 399  |  |
| Mammary | Corn   |          |                                              |          |      |  |
| gland   | stover | Negative | differentiation of blood cells               | 6.89E-07 | 398  |  |
| Mammary | Corn   |          |                                              |          |      |  |
| gland   | stover | Negative | apoptosis of liver cells                     | 6.91E-07 | 83   |  |
| Mammary | Corn   |          |                                              |          |      |  |
| gland   | stover | Negative | cell movement of lymphocytes                 | 6.98E-07 | 194  |  |
| Mammary | Corn   |          |                                              |          |      |  |
| gland   | stover | Negative | generation of blood cells                    | 7.49E-07 | 87   |  |
| Mammary | Corn   |          |                                              |          |      |  |
| gland   | stover | Negative | apoptosis of myeloid cells                   | 7.53E-07 | 98   |  |
| Mammary | Corn   |          |                                              |          |      |  |
| gland   | stover | Negative | Dermatitis                                   | 7.73E-07 | 212  |  |
| Mammary | Corn   |          |                                              |          |      |  |
| gland   | stover | Negative | cell viability of cervical cancer cell lines | 8.05E-07 | 113  |  |
| Mammary | Corn   |          |                                              |          |      |  |
| gland   | stover | Negative | proliferation of embryonic cells             | 8.31E-07 | 126  |  |
| Mammary | Corn   |          |                                              |          |      |  |
| gland   | stover | Negative | cell movement of macrophages                 | 8.38E-07 | 134  |  |
| Mammary | Corn   |          |                                              |          |      |  |
| gland   | stover | Negative | genital tract cancer                         | 8.82E-07 | 1707 |  |
| Mammary | Corn   |          |                                              |          |      |  |
| gland   | stover | Negative | colony formation of tumor cell lines         | 9.26E-07 | 138  |  |
| Mammary | Corn   |          |                                              |          |      |  |
| gland   | stover | Negative | hypertrophy of heart                         | 9.29E-07 | 167  |  |
| Mammary | Corn   |          |                                              |          |      |  |
| gland   | stover | Negative | proliferation of tumor cells                 | 9.31E-07 | 228  |  |
| Mammary | Corn   |          |                                              |          |      |  |
| gland   | stover | Negative | cell death of kidney cell lines              | 9.50E-07 | 151  |  |
| Mammary | Corn   |          |                                              |          |      |  |
| gland   | stover | Negative | differentiation of skin                      | 9.83E-07 | 94   |  |
| Mammary | Corn   | Negative | migration of connective tissue cells         | 9.83E-07 | 94   |  |

|         |        |          |                                            |          |      |  |
|---------|--------|----------|--------------------------------------------|----------|------|--|
| gland   | stover |          |                                            |          |      |  |
| Mammary | Corn   |          |                                            |          |      |  |
| gland   | stover | Negative | female genital neoplasm                    | 1.00E-06 | 1568 |  |
| Mammary | Corn   |          |                                            |          |      |  |
| gland   | stover | Negative | cell death of fibroblasts                  | 1.01E-06 | 133  |  |
| Mammary | Corn   |          |                                            |          |      |  |
| gland   | stover | Negative | cell movement of neutrophils               | 1.11E-06 | 148  |  |
| Mammary | Corn   |          |                                            |          |      |  |
| gland   | stover | Negative | proliferation of dermal cells              | 1.13E-06 | 92   |  |
| Mammary | Corn   |          |                                            |          |      |  |
| gland   | stover | Negative | generation of leukocytes                   | 1.13E-06 | 85   |  |
| Mammary | Corn   |          |                                            |          |      |  |
| gland   | stover | Negative | cell movement of antigen presenting cells  | 1.14E-06 | 172  |  |
| Mammary | Corn   |          |                                            |          |      |  |
| gland   | stover | Negative | metastasis                                 | 1.15E-06 | 359  |  |
| Mammary | Corn   |          |                                            |          |      |  |
| gland   | stover | Negative | morphology of intestine                    | 1.15E-06 | 116  |  |
| Mammary | Corn   |          |                                            |          |      |  |
| gland   | stover | Negative | necrosis of cardiac muscle                 | 1.19E-06 | 111  |  |
| Mammary | Corn   |          |                                            |          |      |  |
| gland   | stover | Negative | hypertrophy of cells                       | 1.27E-06 | 144  |  |
| Mammary | Corn   |          |                                            |          |      |  |
| gland   | stover | Negative | atherosclerosis                            | 1.30E-06 | 224  |  |
| Mammary | Corn   |          |                                            |          |      |  |
| gland   | stover | Negative | morphology of reproductive system          | 1.34E-06 | 257  |  |
| Mammary | Corn   |          |                                            |          |      |  |
| gland   | stover | Negative | proliferation of hematopoietic cells       | 1.36E-06 | 128  |  |
| Mammary | Corn   |          |                                            |          |      |  |
| gland   | stover | Negative | abnormal morphology of reproductive system | 1.37E-06 | 245  |  |
| Mammary | Corn   |          |                                            |          |      |  |
| gland   | stover | Negative | cell death of cardiomyocytes               | 1.38E-06 | 109  |  |
| Mammary | Corn   |          |                                            |          |      |  |
| gland   | stover | Negative | growth of thymus gland                     | 1.39E-06 | 54   |  |
| Mammary | Corn   |          |                                            |          |      |  |
| gland   | stover | Negative | abnormal morphology of respiratory system  | 1.41E-06 | 152  |  |
| Mammary | Corn   |          |                                            |          |      |  |
| gland   | stover | Negative | infection of cervical cancer cell lines    | 1.42E-06 | 213  |  |
| Mammary | Corn   |          |                                            |          |      |  |
| gland   | stover | Negative | atrophy of muscle                          | 1.42E-06 | 78   |  |
| Mammary | Corn   |          |                                            |          |      |  |
| gland   | stover | Negative | morphology of respiratory system           | 1.43E-06 | 154  |  |
| Mammary | Corn   |          |                                            |          |      |  |
| gland   | stover | Negative | Thrombosis                                 | 1.43E-06 | 88   |  |
| Mammary | Corn   | Negative | proliferation of epidermal cells           | 1.43E-06 | 88   |  |

|         |        |          |                                           |          |      |  |
|---------|--------|----------|-------------------------------------------|----------|------|--|
| gland   | stover |          |                                           |          |      |  |
| Mammary | Corn   |          |                                           |          |      |  |
| gland   | stover | Negative | uterine serous papillary cancer           | 1.49E-06 | 117  |  |
| Mammary | Corn   |          |                                           |          |      |  |
| gland   | stover | Negative | adhesion of tumor cell lines              | 1.50E-06 | 143  |  |
| Mammary | Corn   |          |                                           |          |      |  |
| gland   | stover | Negative | cell viability of carcinoma cell lines    | 1.57E-06 | 76   |  |
| Mammary | Corn   |          |                                           |          |      |  |
| gland   | stover | Negative | organization of actin cytoskeleton        | 1.64E-06 | 149  |  |
| Mammary | Corn   |          |                                           |          |      |  |
| gland   | stover | Negative | cellular infiltration by macrophages      | 1.69E-06 | 83   |  |
| Mammary | Corn   |          |                                           |          |      |  |
| gland   | stover | Negative | growth of plasma membrane projections     | 1.71E-06 | 225  |  |
| Mammary | Corn   |          |                                           |          |      |  |
| gland   | stover | Negative | cell death of neuroblastoma cell lines    | 1.74E-06 | 99   |  |
| Mammary | Corn   |          |                                           |          |      |  |
| gland   | stover | Negative | skin abnormality                          | 1.74E-06 | 115  |  |
| Mammary | Corn   |          |                                           |          |      |  |
| gland   | stover | Negative | arrest in interphase                      | 1.77E-06 | 202  |  |
| Mammary | Corn   |          |                                           |          |      |  |
| gland   | stover | Negative | quantity of Ca <sup>2+</sup>              | 1.81E-06 | 198  |  |
| Mammary | Corn   |          |                                           |          |      |  |
| gland   | stover | Negative | urogenital cancer                         | 1.87E-06 | 1947 |  |
| Mammary | Corn   |          |                                           |          |      |  |
| gland   | stover | Negative | sprouting                                 | 1.88E-06 | 188  |  |
| Mammary | Corn   |          |                                           |          |      |  |
| gland   | stover | Negative | consumption of oxygen                     | 1.88E-06 | 81   |  |
| Mammary | Corn   |          |                                           |          |      |  |
| gland   | stover | Negative | serous neoplasm                           | 1.93E-06 | 290  |  |
| Mammary | Corn   |          |                                           |          |      |  |
| gland   | stover | Negative | differentiation of keratinocytes          | 2.13E-06 | 79   |  |
| Mammary | Corn   |          |                                           |          |      |  |
| gland   | stover | Negative | differentiation of dermal cells           | 2.16E-06 | 86   |  |
| Mammary | Corn   |          |                                           |          |      |  |
| gland   | stover | Negative | cell movement of breast cancer cell lines | 2.23E-06 | 143  |  |
| Mammary | Corn   |          |                                           |          |      |  |
| gland   | stover | Negative | cell death of tumor cells                 | 2.27E-06 | 181  |  |
| Mammary | Corn   |          |                                           |          |      |  |
| gland   | stover | Negative | expansion of cells                        | 2.41E-06 | 149  |  |
| Mammary | Corn   |          |                                           |          |      |  |
| gland   | stover | Negative | formation of lamellipodia                 | 2.46E-06 | 84   |  |
| Mammary | Corn   |          |                                           |          |      |  |
| gland   | stover | Negative | cell movement of connective tissue cells  | 2.49E-06 | 112  |  |
| Mammary | Corn   | Negative | cell death of neuroglia                   | 2.61E-06 | 64   |  |

|         |        |          |                                                |          |      |  |
|---------|--------|----------|------------------------------------------------|----------|------|--|
| gland   | stover |          |                                                |          |      |  |
| Mammary | Corn   |          |                                                |          |      |  |
| gland   | stover | Negative | cell death of breast cancer cell lines         | 2.65E-06 | 163  |  |
| Mammary | Corn   |          |                                                |          |      |  |
| gland   | stover | Negative | differentiation of epidermal cells             | 2.65E-06 | 85   |  |
| Mammary | Corn   |          |                                                |          |      |  |
| gland   | stover | Negative | apoptosis of neurons                           | 2.65E-06 | 210  |  |
| Mammary | Corn   |          |                                                |          |      |  |
| gland   | stover | Negative | breast or ovarian cancer                       | 2.73E-06 | 859  |  |
| Mammary | Corn   |          |                                                |          |      |  |
| gland   | stover | Negative | growth of neurites                             | 2.73E-06 | 222  |  |
| Mammary | Corn   |          |                                                |          |      |  |
| gland   | stover | Negative | synthesis of carbohydrate                      | 2.76E-06 | 205  |  |
| Mammary | Corn   |          | intermediate disease stage peripheral arterial |          |      |  |
| gland   | stover | Negative | disease                                        | 2.76E-06 | 82   |  |
| Mammary | Corn   |          |                                                |          |      |  |
| gland   | stover | Negative | migration of vascular endothelial cells        | 2.85E-06 | 86   |  |
| Mammary | Corn   |          |                                                |          |      |  |
| gland   | stover | Negative | experimentally-induced arthritis               | 2.85E-06 | 79   |  |
| Mammary | Corn   |          |                                                |          |      |  |
| gland   | stover | Negative | activation of neuroglia                        | 2.86E-06 | 70   |  |
| Mammary | Corn   |          |                                                |          |      |  |
| gland   | stover | Negative | Rheumatic Disease                              | 2.92E-06 | 497  |  |
| Mammary | Corn   |          |                                                |          |      |  |
| gland   | stover | Negative | quantity of lymphatic system cells             | 2.95E-06 | 136  |  |
| Mammary | Corn   |          |                                                |          |      |  |
| gland   | stover | Negative | chronic inflammatory disorder                  | 2.97E-06 | 451  |  |
| Mammary | Corn   |          |                                                |          |      |  |
| gland   | stover | Negative | gastrointestinal tract cancer                  | 3.00E-06 | 2199 |  |
| Mammary | Corn   |          |                                                |          |      |  |
| gland   | stover | Negative | arteriosclerosis                               | 3.01E-06 | 225  |  |
| Mammary | Corn   |          |                                                |          |      |  |
| gland   | stover | Negative | aggregation of cells                           | 3.06E-06 | 159  |  |
| Mammary | Corn   |          |                                                |          |      |  |
| gland   | stover | Negative | apoptosis of kidney cell lines                 | 3.07E-06 | 119  |  |
| Mammary | Corn   |          |                                                |          |      |  |
| gland   | stover | Negative | shape change of tumor cell lines               | 3.08E-06 | 80   |  |
| Mammary | Corn   |          |                                                |          |      |  |
| gland   | stover | Negative | adhesion of immune cells                       | 3.14E-06 | 170  |  |
| Mammary | Corn   |          |                                                |          |      |  |
| gland   | stover | Negative | development of neurons                         | 3.19E-06 | 366  |  |
| Mammary | Corn   |          |                                                |          |      |  |
| gland   | stover | Negative | generation of lymphocytes                      | 3.19E-06 | 74   |  |
| Mammary | Corn   | Negative | neovascularization                             | 3.19E-06 | 84   |  |

|         |        |          |                                           |          |      |
|---------|--------|----------|-------------------------------------------|----------|------|
| gland   | stover |          |                                           |          |      |
| Mammary | Corn   |          |                                           |          |      |
| gland   | stover | Negative | Gastrointestinal Tract Cancer and Tumors  | 3.33E-06 | 2233 |
| Mammary | Corn   |          |                                           |          |      |
| gland   | stover | Negative | cell death of pheochromocytoma cell lines | 3.64E-06 | 64   |
| Mammary | Corn   |          |                                           |          |      |
| gland   | stover | Negative | branching of cells                        | 3.68E-06 | 179  |
| Mammary | Corn   |          |                                           |          |      |
| gland   | stover | Negative | hypertrophy of tissue                     | 3.73E-06 | 127  |
| Mammary | Corn   |          |                                           |          |      |
| gland   | stover | Negative | abnormal morphology of intestine          | 3.73E-06 | 111  |
| Mammary | Corn   |          |                                           |          |      |
| gland   | stover | Negative | cell death of liver                       | 3.81E-06 | 119  |
| Mammary | Corn   |          |                                           |          |      |
| gland   | stover | Negative | receptor-mediated endocytosis             | 3.89E-06 | 76   |
| Mammary | Corn   |          |                                           |          |      |
| gland   | stover | Negative | formation of connective tissue cells      | 3.90E-06 | 106  |
| Mammary | Corn   |          |                                           |          |      |
| gland   | stover | Negative | cell death of myeloid cells               | 4.06E-06 | 107  |
| Mammary | Corn   |          |                                           |          |      |
| gland   | stover | Negative | concentration of triacylglycerol          | 4.16E-06 | 150  |
| Mammary | Corn   |          |                                           |          |      |
| gland   | stover | Negative | adhesion of blood cells                   | 4.28E-06 | 182  |
| Mammary | Corn   |          |                                           |          |      |
| gland   | stover | Negative | quantity of thymus gland                  | 4.36E-06 | 116  |
| Mammary | Corn   |          |                                           |          |      |
| gland   | stover | Negative | morphology of pulmonary alveolus          | 4.47E-06 | 63   |
| Mammary | Corn   |          |                                           |          |      |
| gland   | stover | Negative | cancer of cells                           | 4.48E-06 | 126  |
| Mammary | Corn   |          |                                           |          |      |
| gland   | stover | Negative | necrosis of liver                         | 4.60E-06 | 118  |
| Mammary | Corn   |          |                                           |          |      |
| gland   | stover | Negative | development of connective tissue cells    | 4.67E-06 | 111  |
| Mammary | Corn   |          |                                           |          |      |
| gland   | stover | Negative | apoptosis of mesangial cells              | 4.67E-06 | 19   |
| Mammary | Corn   |          |                                           |          |      |
| gland   | stover | Negative | concentration of eicosanoid               | 4.77E-06 | 61   |
| Mammary | Corn   |          |                                           |          |      |
| gland   | stover | Negative | quantity of immunoglobulin                | 4.78E-06 | 145  |
| Mammary | Corn   |          |                                           |          |      |
| gland   | stover | Negative | cellular infiltration of phagocytes       | 4.78E-06 | 90   |
| Mammary | Corn   |          |                                           |          |      |
| gland   | stover | Negative | damage of nervous system                  | 4.78E-06 | 112  |
| Mammary | Corn   | Negative | degeneration of central nervous system    | 4.78E-06 | 69   |

|         |        |          |                                                 |          |     |  |
|---------|--------|----------|-------------------------------------------------|----------|-----|--|
| gland   | stover |          |                                                 |          |     |  |
| Mammary | Corn   |          |                                                 |          |     |  |
| gland   | stover | Negative | stress response of cells                        | 4.80E-06 | 72  |  |
| Mammary | Corn   |          |                                                 |          |     |  |
| gland   | stover | Negative | formation of muscle cells                       | 5.04E-06 | 91  |  |
| Mammary | Corn   |          |                                                 |          |     |  |
| gland   | stover | Negative | mass of connective tissue                       | 5.04E-06 | 101 |  |
| Mammary | Corn   |          |                                                 |          |     |  |
| gland   | stover | Negative | proliferation of lymphatic system cells         | 5.04E-06 | 101 |  |
| Mammary | Corn   |          |                                                 |          |     |  |
| gland   | stover | Negative | familial dementia                               | 5.22E-06 | 28  |  |
| Mammary | Corn   |          |                                                 |          |     |  |
| gland   | stover | Negative | concentration of Ca <sup>2+</sup>               | 5.24E-06 | 67  |  |
| Mammary | Corn   |          |                                                 |          |     |  |
| gland   | stover | Negative | apoptosis of macrophages                        | 5.25E-06 | 57  |  |
| Mammary | Corn   |          |                                                 |          |     |  |
| gland   | stover | Negative | cell movement of carcinoma cell lines           | 5.48E-06 | 103 |  |
| Mammary | Corn   |          |                                                 |          |     |  |
| gland   | stover | Negative | synthesis of steroid                            | 5.53E-06 | 127 |  |
| Mammary | Corn   |          |                                                 |          |     |  |
| gland   | stover | Negative | ion homeostasis of cells                        | 5.65E-06 | 263 |  |
| Mammary | Corn   |          |                                                 |          |     |  |
| gland   | stover | Negative | migration of fibroblasts                        | 5.82E-06 | 74  |  |
| Mammary | Corn   |          |                                                 |          |     |  |
| gland   | stover | Negative | invasion of tumor                               | 5.89E-06 | 120 |  |
| Mammary | Corn   |          |                                                 |          |     |  |
| gland   | stover | Negative | proliferation of hematopoietic progenitor cells | 5.89E-06 | 120 |  |
| Mammary | Corn   |          |                                                 |          |     |  |
| gland   | stover | Negative | cell death of phagocytes                        | 5.89E-06 | 105 |  |
| Mammary | Corn   |          |                                                 |          |     |  |
| gland   | stover | Negative | Fibrosis                                        | 5.95E-06 | 252 |  |
| Mammary | Corn   |          |                                                 |          |     |  |
| gland   | stover | Negative | morphology of blood cells                       | 5.95E-06 | 199 |  |
| Mammary | Corn   |          |                                                 |          |     |  |
| gland   | stover | Negative | activation of antigen presenting cells          | 5.95E-06 | 154 |  |
| Mammary | Corn   |          |                                                 |          |     |  |
| gland   | stover | Negative | neoplasia of tumor cell lines                   | 5.95E-06 | 154 |  |
| Mammary | Corn   |          |                                                 |          |     |  |
| gland   | stover | Negative | immediate hypersensitivity                      | 5.96E-06 | 155 |  |
| Mammary | Corn   |          |                                                 |          |     |  |
| gland   | stover | Negative | quantity of blastocyst                          | 6.02E-06 | 26  |  |
| Mammary | Corn   |          |                                                 |          |     |  |
| gland   | stover | Negative | cell death of sensory neurons                   | 6.03E-06 | 36  |  |
| Mammary | Corn   | Negative | apoptosis of phagocytes                         | 6.13E-06 | 95  |  |

|         |        |          |                                           |          |      |
|---------|--------|----------|-------------------------------------------|----------|------|
| gland   | stover |          |                                           |          |      |
| Mammary | Corn   |          |                                           |          |      |
| gland   | stover | Negative | abdominal carcinoma                       | 6.14E-06 | 2589 |
| Mammary | Corn   |          |                                           |          |      |
| gland   | stover | Negative | metastasis of cells                       | 6.18E-06 | 123  |
| Mammary | Corn   |          |                                           |          |      |
| gland   | stover | Negative | apoptosis of T lymphocytes                | 6.28E-06 | 137  |
| Mammary | Corn   |          |                                           |          |      |
| gland   | stover | Negative | metabolism of DNA                         | 6.29E-06 | 191  |
| Mammary | Corn   |          |                                           |          |      |
| gland   | stover | Negative | quantity of trophoblast cells             | 6.30E-06 | 25   |
| Mammary | Corn   |          |                                           |          |      |
| gland   | stover | Negative | synthesis of terpenoid                    | 6.31E-06 | 138  |
| Mammary | Corn   |          |                                           |          |      |
| gland   | stover | Negative | cell death of skin                        | 6.31E-06 | 56   |
| Mammary | Corn   |          |                                           |          |      |
| gland   | stover | Negative | migration of vascular smooth muscle cells | 6.31E-06 | 56   |
| Mammary | Corn   |          |                                           |          |      |
| gland   | stover | Negative | apoptosis of hepatocytes                  | 6.37E-06 | 69   |
| Mammary | Corn   |          |                                           |          |      |
| gland   | stover | Negative | muscular hypertrophy                      | 6.46E-06 | 102  |



Figure S1. A working hypothesis of mechanism through which quality of forage affects amino acids and energy metabolism function in dairy cows, suggesting roles that could be played by microRNAs (miRNAs). *Note:* positively-associated miRNAs (positively correlated with nitrogen efficiency and feed efficiency or negatively correlated with milk urea nitrogen content) and differentially expressed (DE, AL vs RS or (and) AL vs CS) in cows fed AL is indicated by (+) while negative-associated miRNAs (negatively associated with nitrogen efficiency and efficiency or positively associated with milk urea nitrogen content) and differentially expressed (DE, AL vs RS or (and) AL vs CS) in cows fed AL is indicated by (-). The molecular flows are indicated by slender arrows. Bolded solid arrows indicate increase (up) and decrease (down) for either molecules quantity or expression of miRNA. Broken line indicates certain metabolites regulate biological process of molecules.

Abbreviations: AL= alfalfa hay diet; RS= rice straw diet; CS= corn stover diet; RDP= rumen degradable protein; AAs= amino acids; MCP= microbial crude protein; VFAs= volatile fatty acids; RUP= rumen undegradable protein.

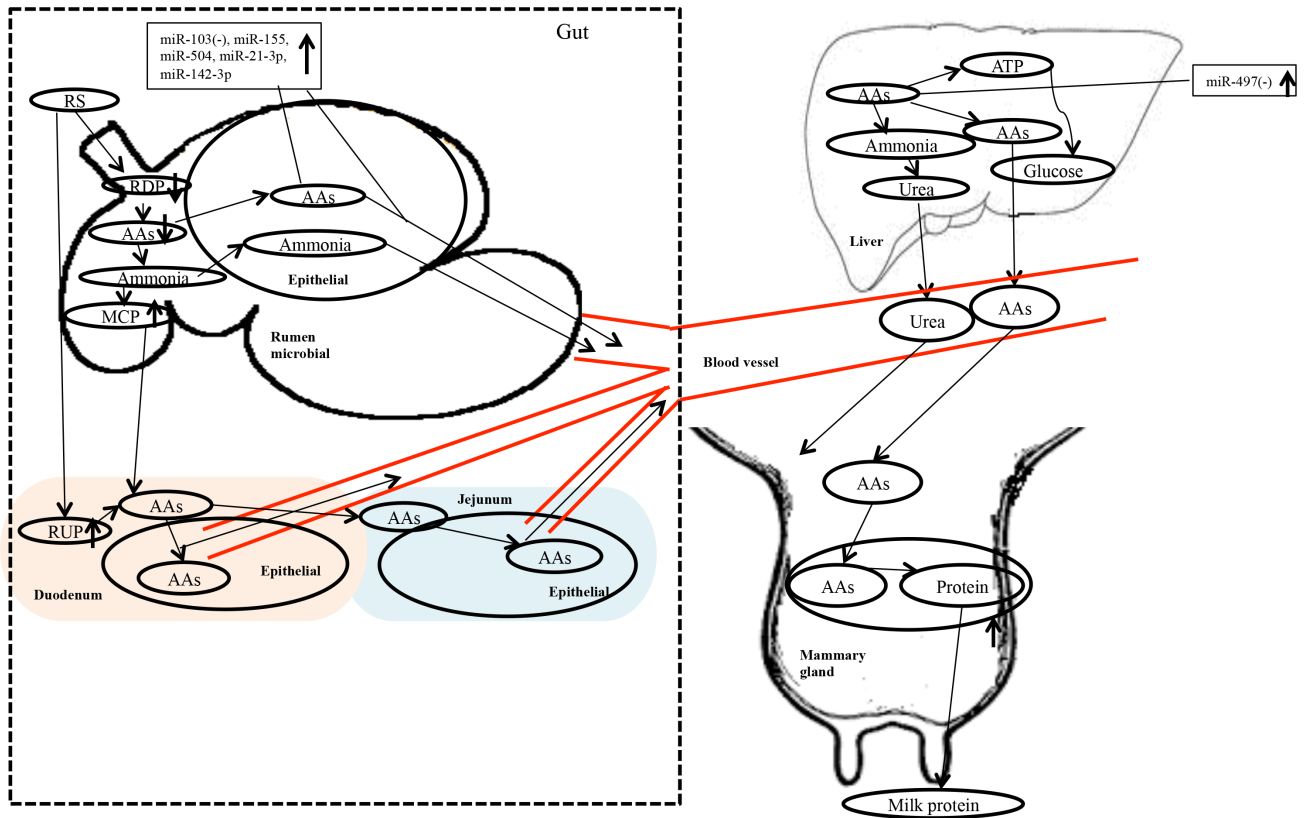

→ Metabolites flow

↑ Up-regulated

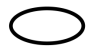

Metabolites

Targeting

↓ Down-regulated

(+) miRNAs that were positively correlated with N efficiency

(-) miRNAs that were negatively correlated with N efficiency

Figure S2. A working hypothesis of mechanism through which quality of forage affects amino acids and energy metabolism function in dairy cows, suggesting roles that could be played by microRNAs (miRNAs). *Note:* positively-associated miRNAs (positively correlated with nitrogen efficiency and feed efficiency or negatively correlated with milk urea nitrogen content) and differentially expressed (DE, AL vs RS or (and) AL vs CS) in cows fed AL is indicated by (+) while negative-associated miRNAs (negatively associated with nitrogen efficiency and efficiency or positively associated with milk urea nitrogen content) and differentially expressed (DE, AL vs RS or (and) AL vs CS) in cows fed AL is indicated by (-). The molecular flows are indicated by slender arrows. Bolded solid arrows indicate increase (up) and decrease (down) for either molecules quantity or expression of miRNA. Broken line indicates certain metabolites regulate biological process of molecules.

Abbreviations: AL= alfalfa hay diet; RS= rice straw diet; CS= corn stover diet; RDP= rumen degradable protein; AAs= amino acids; MCP= microbial crude protein; VFAs= volatile fatty acids; RUP= rumen undegradable protein.

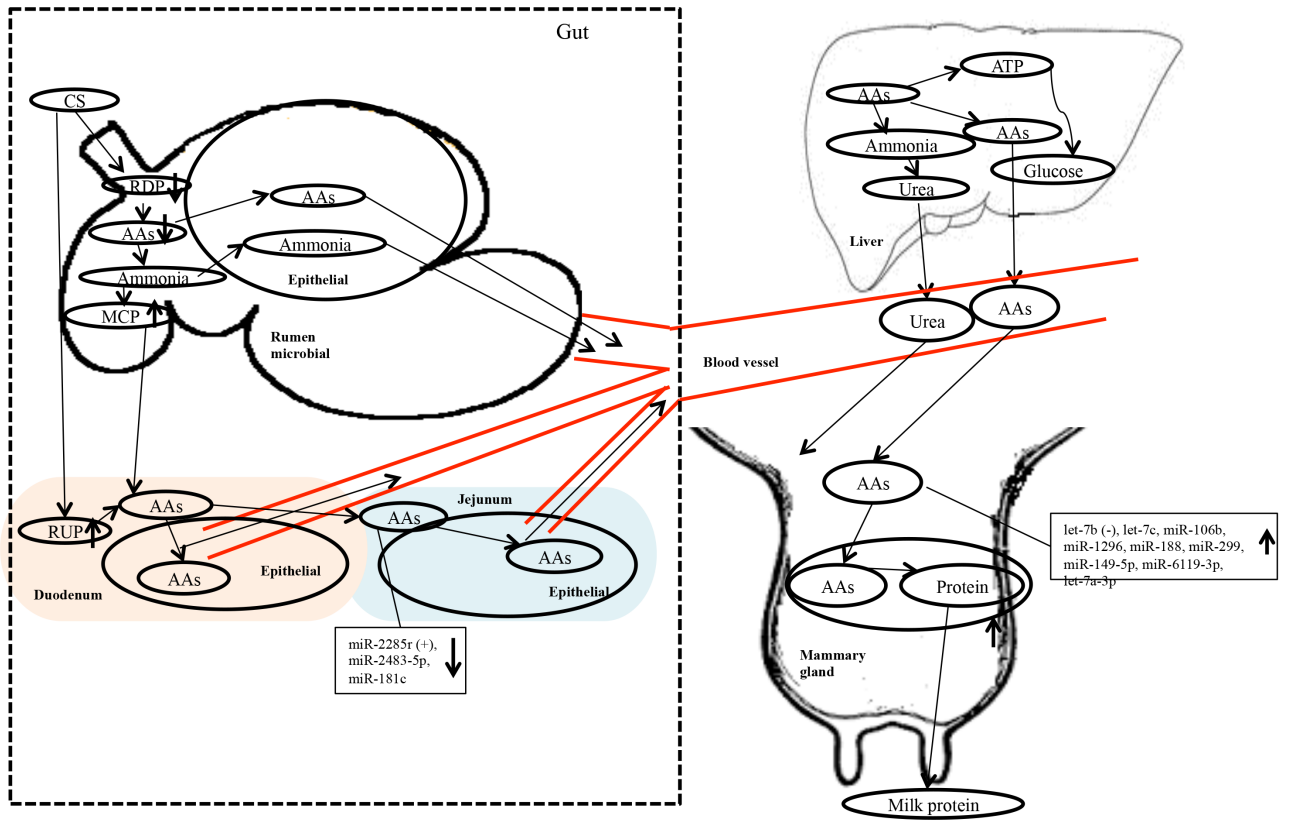

→ Metabolites flow

↑ Up-regulated

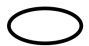

Metabolites

---> Targeting

(+) miRNAs that were positively correlated with N efficiency

↓ Down-regulated

(-) miRNAs that were negatively correlated with N efficiency
